# Supplementary material for: 4′-Phosphopantetheine and long acyl chain-dependent interactions are integral to human mitochondrial acyl carrier protein function
Source: Royal Society of Chemistry journal article supplement (doi:10.1039/c8md00489g), 2019-01-01
Supplement: c8md00489g2.xlsx [file c8md00489g2.xlsx]

## Sheet: WT-ACPM PD_All Detections
	LEGEND
	Gene - Represents gene name for protein			Avg Areas - Control Samples - Avg Areas of Both control injections							Log2_FoldChange_BR1 - Log(base2) value for BR1 fold change														MitoCarta2.0 Dataset Annotation - How is a protein defined by the MitoCarts 2.0 database?
	Protein Description - Description of protein			Avg Areas - Samples - Avg Areas of both biological replicates							Log2_FoldChange_BR2 - Log(base2) value for BR2 fold change														Protein Synonyms - All synonyms for the protein
	# Unique Peptides - Number of unique peptides detected for particular protein			Fold Change (Sample/Control) - Ratio of Avg Sample/Avg Control							Detected in # Injections - Times a protein was detected in the sample injections														EnsemblGeneID - The Ensenbl gene ID
	# Peptides - Number of total peptides detected for a protein (including shared ones)			Log2 Fold Change (FC) - LOg2 value for Fold Change							Is pValue <= 0.05? - True or false argument for significance of pvalue
	#PSMs - Number of Peptide Spectral Matches for specific protein			p-Value - p-value od determined by the student's t-test							> 3 Unique peptides? - True or false argument for protein having at least 3 unique peptides
	Areas: Control 1 - Total protein area in control sample 1			NegLog10Pval - Negative log (base10) value of the p-value							> 5 PSMs? - True or false argument for a protein having at least 5 peptide spectral matches
	Areas: Control 2 - Total protein area in control sample 2			Avg Sample_BR1 - Avg areas for BR1 (both injections)							# Datasets protein found in Crapome - How many times is a protein detected as a contaminant in the crapome respostory?
	Areas: BioRep1 - Injection 1 - Total protein area in 1st biological replicate, Injection 1			Avg Sample_BR - Avg areas for BR2 (both injections)							Total Crapome Datasets - Total number of affinity purification datasets in the crapome repository
	Areas: BioRep1 - Injection 2 - Total protein area in 1st biological replicate, Injection 2			Fold Change_BR1 - Ratio of Avg areas for BR1/Avg Control							% Crapome probability - Percentage of the ratio of columsn AB and AC
	Areas: BioRep2 - Injection 1 - Total protein area in 2nd biological replicate, Injection 1			Fold Change_BR2 - Ratio of Avg areas for BR2/Avg Control
	Areas: BioRep2 - Injection 1 - Total protein area in 2nd biological replicate, Injection 2
Gene	Protein Description	# Unique Peptides	# Peptides	# PSMs	Areas: Control -1	Areas: Control -2	Areas: BioRep1- (Injection1)	Areas: BioRep1 (Injection2)	Areas: BioRep2 (Injection1)	Areas: BioRep2 (Injection2)	Avg Areas - Control Samples	Avg Areas - Samples	Fold Change (Sample/Control)	Log2 Fold Change (FC)	p-Value	NegLog10 Pval	Avg Sample_BR1	Avg Sample _BR2	Fold Change_BR1	Fold Change_BR2	Log2_FoldChange_BR1	Log2_FoldChange_BR2	Detected in # Injections	Is pval<0.05?	>3 Unq Peptides?	>5 PSMs?	# Datasets protein found in Crapome	Total Crapome Datasets	% Crapome Probability	MitoCarta2.0 Dataset Annotation	Protein Synonyms	EnsemblGeneID
SDHB	Succinate dehydrogenase [ubiquinone] iron-sulfur subunit, mitochondrial OS=Homo sapiens GN=SDHB PE=1 SV=3	9	9	72	7600000	7500000	150000000	150000000	150000000	150000000	7550000	150000000	19.8675	4.31234	0.000223454	3.65081	150000000	150000000	19.8675	19.8675	4.31234	4.31234	4	TRUE	TRUE	TRUE	18	411	4.37956	Tmito	CWS2|IP|PGL4|SDH|SDH1|SDH2|SDHIP|P21912	ENSG00000117118
SDHA	Succinate dehydrogenase [ubiquinone] flavoprotein subunit, mitochondrial OS=Homo sapiens GN=SDHA PE=1 SV=2	6	6	19	16000000	7300000	15000000	13000000	22000000	24000000	11650000	18500000	1.58798	0.667195	0.323277	0.490426	23000000	14000000	1.97425	1.20172	0.981304	0.265097	4	FALSE	TRUE	TRUE	44	411	10.7056	Tmito	CMD1GG|FP|PGL5|SDH1|SDH2|SDHF|P31040	ENSG00000073578
UQCRC1	Cytochrome b-c1 complex subunit 1, mitochondrial OS=Homo sapiens GN=UQCRC1 PE=1 SV=3	1	1	3		4800000		6400000		8300000	2400000	3675000	1.53125	0.61471	0.722023	0.141449	4150000	3200000	1.72917	1.33333	0.790077	0.415037	2	FALSE	FALSE	FALSE	30	411	7.29927	Tmito	D3S3191|QCR1|UQCR1|P31930	ENSG00000010256
PDHA1	Isoform 4 of Pyruvate dehydrogenase E1 component subunit alpha, somatic form, mitochondrial OS=Homo sapiens GN=PDHA1	2	2	15	14000000	15000000	21000000	23000000	24000000	13000000	14500000	20250000	1.39655	0.481869	0.102709	0.988392	18500000	22000000	1.27586	1.51724	0.351472	0.601451	4	FALSE	FALSE	TRUE	47	411	11.4355	Tmito	PDHA|PDHCE1A|PHE1A|P08559	ENSG00000131828
COQ9	Ubiquinone biosynthesis protein COQ9, mitochondrial OS=Homo sapiens GN=COQ9 PE=1 SV=1	3	3	5		11000000		22000000	15000000	13000000	5500000	12500000	2.27273	1.18442	0.414055	0.382942	14000000	11000000	2.54545	2	1.34792	1	3	FALSE	TRUE	TRUE	0	411	0	Tmito	C16orf49|COQ10D5|O75208	ENSG00000088682
ATP5D	ATP synthase subunit delta, mitochondrial OS=Homo sapiens GN=ATP5D PE=1 SV=2	2	2	20	28000000	21000000	26000000	23000000	35000000	33000000	24500000	29250000	1.19388	0.255655	0.386223	0.413162	34000000	24500000	1.38776	1	0.472753	0	4	FALSE	FALSE	TRUE	21	411	5.10949	Tmito	P30049	ENSG00000099624
COX5A	Cytochrome c oxidase subunit 5A, mitochondrial OS=Homo sapiens GN=COX5A PE=2 SV=1	1	1	1	15000000						7500000	0	0		0.5	0.30103	0	0	0	0			0	FALSE	FALSE	FALSE	24	411	5.83942	Tmito	COX|COX-VA|VA|P20674	ENSG00000178741
PMPCB	Mitochondrial-processing peptidase subunit beta OS=Homo sapiens GN=PMPCB PE=1 SV=2	8	8	34			20000000	18000000	23000000	19000000	0	20000000	100	6.64386	0.000343763	3.46374	21000000	19000000	100	100	6.64386	6.64386	4	TRUE	TRUE	TRUE	31	411	7.54258	Tmito	Beta-MPP|MPP11|MPPB|MPPP52|P-52|O75439	ENSG00000105819
UQCRFS1	Cytochrome b-c1 complex subunit Rieske, mitochondrial OS=Homo sapiens GN=UQCRFS1 PE=1 SV=2	9	9	133			540000000	510000000	480000000	520000000	0	512500000	100	6.64386	3.19293e-05	4.49581	500000000	525000000	100	100	6.64386	6.64386	4	TRUE	TRUE	TRUE	10	411	2.43309	Tmito	RIP1|RIS1|RISP|UQCR5|P47985	ENSG00000169021
ATP5A1	ATP synthase subunit alpha, mitochondrial OS=Homo sapiens GN=ATP5A1 PE=1 SV=1	23	23	379	94000000	110000000	850000000	890000000	1000000000	950000000	102000000	922500000	9.04412	3.17698	7.43234e-05	4.12887	975000000	870000000	9.55882	8.52941	3.25683	3.09245	4	TRUE	TRUE	TRUE	210	411	51.0949	Tmito	ATP5A|ATP5AL2|ATPM|HEL-S-123m|MC5DN4|MOM2|OMR|ORM|hATP1|P25705	ENSG00000152234
PDHB	Pyruvate dehydrogenase E1 component subunit beta, mitochondrial OS=Homo sapiens GN=PDHB PE=1 SV=3	4	4	18	16000000	7700000	9000000	8900000	12000000	12000000	11850000	10475000	0.883966	-0.177937	0.796904	0.0985939	12000000	8950000	1.01266	0.755274	0.0181473	-0.404927	4	FALSE	TRUE	TRUE	52	411	12.6521	Tmito	PDHBD|PDHE1-B|PHE1B|P11177	ENSG00000168291
UQCRC2	Cytochrome b-c1 complex subunit 2, mitochondrial OS=Homo sapiens GN=UQCRC2 PE=1 SV=3	1	1	2					12000000	9000000	0	5250000	100	6.64386	0.18812	0.725564	10500000	0	100	0	6.64386		2	FALSE	FALSE	FALSE	38	411	9.24574	Tmito	MC3DN5|QCR2|UQCR2|P22695	ENSG00000140740
MRPS35	28S ribosomal protein S35, mitochondrial OS=Homo sapiens GN=MRPS35 PE=1 SV=1	1	1	2	7000000					10000000	3500000	2500000	0.714286	-0.485427	0.836873	0.0773403	5000000	0	1.42857	0	0.514573		1	FALSE	FALSE	FALSE	25	411	6.08273	Tmito	MDS023|MRP-S28|MRPS28|P82673	ENSG00000061794
MRPL53	39S ribosomal protein L53, mitochondrial OS=Homo sapiens GN=MRPL53 PE=1 SV=1	3	3	22	14000000	10000000	29000000	28000000	37000000	33000000	12000000	31750000	2.64583	1.40372	0.00574338	2.24083	35000000	28500000	2.91667	2.375	1.54432	1.24793	4	TRUE	TRUE	TRUE	3	411	0.729927	Tmito	L53MT|Q96EL3	ENSG00000204822
MDH2	Malate dehydrogenase, mitochondrial OS=Homo sapiens GN=MDH2 PE=1 SV=3	7	7	35	16000000	25000000	11000000	13000000	11000000	12000000	20500000	11750000	0.573171	-0.802963	0.29957	0.523502	11500000	12000000	0.560976	0.585366	-0.83399	-0.77259	4	FALSE	TRUE	TRUE	103	411	25.0608	Tmito	M-MDH|MDH|MGC:3559|MOR1|P40926	ENSG00000146701
MRPS27	28S ribosomal protein S27, mitochondrial OS=Homo sapiens GN=MRPS27 PE=2 SV=1	18	18	112	64000000	73000000	51000000	50000000	63000000	66000000	68500000	57500000	0.839416	-0.252542	0.177699	0.750316	64500000	50500000	0.941606	0.737226	-0.0868048	-0.439821	4	FALSE	TRUE	TRUE	31	411	7.54258	Tmito	MRP-S27|S27mt|Q92552	ENSG00000113048
CS	Citrate synthase, mitochondrial OS=Homo sapiens GN=CS PE=1 SV=2	5	5	17	13000000	19000000	8200000	10000000	7800000	8700000	16000000	8675000	0.542188	-0.883136	0.240403	0.619059	8250000	9100000	0.515625	0.56875	-0.955606	-0.814133	4	FALSE	TRUE	TRUE	90	411	21.8978	Tmito	O75390	ENSG00000062485
GRPEL1	GrpE protein homolog 1, mitochondrial OS=Homo sapiens GN=GRPEL1 PE=1 SV=2	2	2	16	9300000	10000000	9100000	10000000	12000000	12000000	9650000	10775000	1.11658	0.159087	0.238739	0.622076	12000000	9550000	1.24352	0.989637	0.314434	-0.0150282	4	FALSE	FALSE	TRUE	79	411	19.2214	Tmito	HMGE|Q9HAV7	ENSG00000109519
DLAT	Dihydrolipoyllysine-residue acetyltransferase component of pyruvate dehydrogenase complex, mitochondrial OS=Homo sapiens GN=DLAT PE=1 SV=3	10	10	38	13000000	16000000	5800000	12000000	15000000	18000000	14500000	12700000	0.875862	-0.191224	0.581645	0.235342	16500000	8900000	1.13793	0.613793	0.186413	-0.704176	4	FALSE	TRUE	TRUE	38	411	9.24574	Tmito	DLTA|PDC-E2|PDCE2|P10515	ENSG00000150768
LRPPRC	Leucine-rich PPR motif-containing protein, mitochondrial OS=Homo sapiens GN=LRPPRC PE=1 SV=3	42	42	234	28000000	27000000	34000000	30000000	35000000	36000000	27500000	33750000	1.22727	0.295456	0.0134868	1.87009	35500000	32000000	1.29091	1.16364	0.368387	0.21864	4	TRUE	TRUE	TRUE	130	411	31.6302	Tmito	CLONE-23970|GP130|LRP130|LSFC|P42704	ENSG00000138095
DLST	Dihydrolipoyllysine-residue succinyltransferase component of 2-oxoglutarate dehydrogenase complex, mitochondrial OS=Homo sapiens GN=DLST PE=1 SV=4	4	4	8	6900000	8100000	8300000		11000000	9400000	7500000	7175000	0.956667	-0.0639118	0.905052	0.0433267	10200000	4150000	1.36	0.553333	0.443607	-0.853779	3	FALSE	TRUE	TRUE	57	411	13.8686	Tmito	DLTS|P36957	ENSG00000119689
PDHX	Pyruvate dehydrogenase protein X component, mitochondrial OS=Homo sapiens GN=PDHX PE=1 SV=3	1	1	1		1700000					850000	0	0		0.5	0.30103	0	0	0	0			0	FALSE	FALSE	FALSE	12	411	2.91971	Tmito	DLDBP|E3BP|OPDX|PDX1|proX|O00330	ENSG00000110435
NDUFS1	Isoform 2 of NADH-ubiquinone oxidoreductase 75 kDa subunit, mitochondrial OS=Homo sapiens GN=NDUFS1	17	17	53			23000000	21000000	24000000	25000000	0	23250000	100	6.64386	0.000108727	3.96366	24500000	22000000	100	100	6.64386	6.64386	4	TRUE	TRUE	TRUE	19	411	4.62287	Tmito	CI-75Kd|CI-75k|PRO1304|P28331	ENSG00000023228
MRPL46	39S ribosomal protein L46, mitochondrial OS=Homo sapiens GN=MRPL46 PE=1 SV=1	7	7	31			32000000	31000000	36000000	35000000	0	33500000	100	6.64386	9.84618e-05	4.00673	35500000	31500000	100	100	6.64386	6.64386	4	TRUE	TRUE	TRUE	18	411	4.37956	Tmito	C15orf4|LIECG2|P2ECSL|Q9H2W6	ENSG00000259494
ATP5E	ATP synthase subunit epsilon, mitochondrial OS=Homo sapiens GN=ATP5E PE=1 SV=2	1	1	8	20000000	17000000	12000000	11000000	17000000	17000000	18500000	14250000	0.77027	-0.376563	0.142498	0.846192	17000000	11500000	0.918919	0.621622	-0.121991	-0.685891	4	FALSE	FALSE	TRUE	1	411	0.243309	Tmito	ATPE|MC5DN3|P56381	ENSG00000124172
SLC25A3	Phosphate carrier protein, mitochondrial OS=Homo sapiens GN=SLC25A3 PE=1 SV=2	1	1	2			15000000		18000000		0	8250000	100	6.64386	0.18431	0.734451	9000000	7500000	100	100	6.64386	6.64386	2	FALSE	FALSE	FALSE	130	411	31.6302	Tmito	PHC|PTP|Q00325	ENSG00000075415
MRPS23	28S ribosomal protein S23, mitochondrial OS=Homo sapiens GN=MRPS23 PE=1 SV=2	3	3	18	7300000	7000000	6500000	7100000	8600000	8600000	7150000	7700000	1.07692	0.106915	0.386019	0.413391	8600000	6800000	1.2028	0.951049	0.266393	-0.0724085	4	FALSE	TRUE	TRUE	21	411	5.10949	Tmito	HSPC329|MRP-S23|Q9Y3D9	ENSG00000181610
PMPCA	Mitochondrial-processing peptidase subunit alpha OS=Homo sapiens GN=PMPCA PE=1 SV=2	11	11	45			19000000	16000000	15000000	16000000	0	16500000	100	6.64386	0.000315733	3.50068	15500000	17500000	100	100	6.64386	6.64386	4	TRUE	TRUE	TRUE	19	411	4.62287	Tmito	Alpha-MPP|INPP5E|P-55|Q10713	ENSG00000165688
ATP5B	ATP synthase subunit beta, mitochondrial OS=Homo sapiens GN=ATP5B PE=1 SV=3	25	25	309	92000000	130000000	150000000	150000000	220000000	220000000	111000000	185000000	1.66667	0.736966	0.071171	1.1477	220000000	150000000	1.98198	1.35135	0.986944	0.434403	4	FALSE	TRUE	TRUE	211	411	51.3382	Tmito	ATPMB|ATPSB|HEL-S-271|P06576	ENSG00000110955
IDH3A	Isocitrate dehydrogenase [NAD] subunit alpha, mitochondrial OS=Homo sapiens GN=IDH3A PE=1 SV=1	1	1	1	2400000						1200000	0	0		0.5	0.30103	0	0	0	0			0	FALSE	FALSE	FALSE	32	411	7.78589	Tmito	P50213	ENSG00000166411
MRPL34	Ribosomal protein L34 OS=Homo sapiens GN=MRPL34 PE=2 SV=1	2	2	3			11000000		16000000	18000000	0	11250000	100	6.64386	0.0682727	1.16575	17000000	5500000	100	100	6.64386	6.64386	3	FALSE	FALSE	FALSE	3	411	0.729927	Tmito	L34mt|Q9BQ48	ENSG00000130312
MRPL2	39S ribosomal protein L2, mitochondrial OS=Homo sapiens GN=MRPL2 PE=1 SV=2	3	3	8			10000000	9100000	13000000	14000000	0	11525000	100	6.64386	0.00224047	2.64966	13500000	9550000	100	100	6.64386	6.64386	4	TRUE	TRUE	TRUE	22	411	5.3528	Tmito	MRP-L14|RPML14|Q5T653	ENSG00000112651
ATP5O	ATP synthase subunit O, mitochondrial OS=Homo sapiens GN=ATP5O PE=1 SV=1	4	7	44	27000000	27000000	21000000	24000000	30000000	31000000	27000000	26500000	0.981481	-0.026967	0.848182	0.071511	30500000	22500000	1.12963	0.833333	0.17585	-0.263034	4	FALSE	TRUE	TRUE	51	411	12.4088	Tmito	ATPO|OSCP|P48047	ENSG00000241837
ECHS1	Enoyl-CoA hydratase, mitochondrial OS=Homo sapiens GN=ECHS1 PE=1 SV=4	4	4	14	6700000	6200000	9800000	12000000	10000000	12000000	6450000	10950000	1.69767	0.76356	0.00292453	2.53394	11000000	10900000	1.70543	1.68992	0.770132	0.756957	4	TRUE	TRUE	TRUE	40	411	9.73236	Tmito	SCEH|P30084	ENSG00000127884
HADHA	Trifunctional enzyme subunit alpha, mitochondrial OS=Homo sapiens GN=HADHA PE=1 SV=2	22	22	166	25000000	25000000	72000000	62000000	72000000	78000000	25000000	71000000	2.84	1.50589	0.000811368	3.09078	75000000	67000000	3	2.68	1.58496	1.42223	4	TRUE	TRUE	TRUE	72	411	17.5182	Tmito	ECHA|GBP|HADH|LCEH|LCHAD|MTPA|TP-ALPHA|P40939	ENSG00000084754
ETFA	Electron transfer flavoprotein subunit alpha, mitochondrial OS=Homo sapiens GN=ETFA PE=1 SV=1	10	10	58			35000000	39000000	40000000	42000000	0	39000000	100	6.64386	0.000117962	3.92826	41000000	37000000	100	100	6.64386	6.64386	4	TRUE	TRUE	TRUE	47	411	11.4355	Tmito	EMA|GA2|MADD|P13804	ENSG00000140374
NDUFS7	NADH dehydrogenase [ubiquinone] iron-sulfur protein 7, mitochondrial OS=Homo sapiens GN=NDUFS7 PE=1 SV=3	3	3	13			31000000	31000000	36000000	27000000	0	31250000	100	6.64386	0.000446612	3.35007	31500000	31000000	100	100	6.64386	6.64386	4	TRUE	TRUE	TRUE	17	411	4.13625	Tmito	CI-20|CI-20KD|MY017|PSST|O75251	ENSG00000115286
CPT2	Carnitine O-palmitoyltransferase 2, mitochondrial OS=Homo sapiens GN=CPT2 PE=1 SV=2	4	4	16		6100000	7500000	9100000	8000000	9300000	3050000	8475000	2.77869	1.4744	0.321433	0.492909	8650000	8300000	2.83607	2.72131	1.50389	1.4443	4	FALSE	TRUE	TRUE	7	411	1.70316	Tmito	CPT1|CPTASE|IIAE4|P23786	ENSG00000157184
IDH3B	Isocitrate dehydrogenase [NAD] subunit beta, mitochondrial OS=Homo sapiens GN=IDH3B PE=1 SV=2	1	1	2			7700000			7500000	0	3800000	100	6.64386	0.181745	0.740537	3750000	3850000	100	100	6.64386	6.64386	2	FALSE	FALSE	FALSE	17	411	4.13625	Tmito	H-IDHB|RP46|O43837	ENSG00000101365
LETM1	LETM1 and EF-hand domain-containing protein 1, mitochondrial OS=Homo sapiens GN=LETM1 PE=1 SV=1	3	3	10	3700000	3300000	4400000	4100000	6500000	7100000	3500000	5525000	1.57857	0.65862	0.0700626	1.15451	6800000	4250000	1.94286	1.21429	0.95818	0.280108	4	FALSE	TRUE	TRUE	18	411	4.37956	Tmito	O95202	ENSG00000168924
ATP5I	ATP synthase subunit e, mitochondrial OS=Homo sapiens GN=ATP5I PE=1 SV=2	3	3	8	14000000	1100000	9500000		7900000	9300000	7550000	6675000	0.884106	-0.177709	0.915529	0.0383277	8600000	4750000	1.13907	0.629139	0.18786	-0.668549	3	FALSE	TRUE	TRUE	6	411	1.45985	Tmito	ATP5K|P56385	ENSG00000169020
NDUFV2	NADH dehydrogenase [ubiquinone] flavoprotein 2, mitochondrial OS=Homo sapiens GN=NDUFV2 PE=4 SV=1	1	1	2					3600000	4800000	0	2100000	100	6.64386	0.18812	0.725564	4200000	0	100	0	6.64386		2	FALSE	FALSE	FALSE	3	411	0.729927	Tmito	CI-24k|P19404	ENSG00000178127
COQ6	Ubiquinone biosynthesis monooxygenase COQ6 OS=Homo sapiens GN=COQ6 PE=1 SV=2	2	2	6	3400000	4700000		3700000	5300000	5300000	4050000	3575000	0.882716	-0.179979	0.753063	0.123168	5300000	1850000	1.30864	0.45679	0.38807	-1.1304	3	FALSE	FALSE	TRUE	0	411	0	Tmito	CGI10|COQ10D6|Q9Y2Z9	ENSG00000119723
MRPL43	Isoform 6 of 39S ribosomal protein L43, mitochondrial OS=Homo sapiens GN=MRPL43	3	3	10	7100000		24000000	29000000	38000000	26000000	3550000	29250000	8.23944	3.04255	0.0174378	1.75851	32000000	26500000	9.01408	7.46479	3.17218	2.9001	4	TRUE	TRUE	TRUE	8	411	1.94647	Tmito	bMRP36a|Q8N983	ENSG00000055950
ATP5J	ATP synthase-coupling factor 6, mitochondrial OS=Homo sapiens GN=ATP5J PE=2 SV=1	1	1	5	14000000		14000000	13000000	19000000	15000000	7000000	15250000	2.17857	1.12338	0.443296	0.353306	17000000	13500000	2.42857	1.92857	1.28011	0.947533	4	FALSE	FALSE	TRUE	10	411	2.43309	Tmito	ATP5|ATP5A|ATPM|CF6|F6|P18859	ENSG00000154723
LONP1	Lon protease homolog, mitochondrial OS=Homo sapiens GN=LONP1 PE=1 SV=2	1	1	2				1600000		1700000	0	825000	100	6.64386	0.181982	0.739971	850000	800000	100	100	6.64386	6.64386	2	FALSE	FALSE	FALSE	73	411	17.7616	Tmito	LON|LONP|LonHS|PIM1|PRSS15|hLON|P36776	ENSG00000196365
DLD	Dihydrolipoyl dehydrogenase, mitochondrial OS=Homo sapiens GN=DLD PE=1 SV=2	4	4	16	5200000	5200000		9100000	8400000	8900000	5200000	6600000	1.26923	0.343954	0.57058	0.243683	8650000	4550000	1.66346	0.875	0.734189	-0.192645	3	FALSE	TRUE	TRUE	84	411	20.438	Tmito	DLDD|DLDH|E3|GCSL|LAD|PHE3|P09622	ENSG00000091140
AIFM1	Apoptosis-inducing factor 1, mitochondrial OS=Homo sapiens GN=AIFM1 PE=1 SV=1	5	5	12	5800000	5300000	5100000		5800000	5700000	5550000	4150000	0.747748	-0.419376	0.391286	0.407506	5750000	2550000	1.03604	0.459459	0.0510742	-1.12199	3	FALSE	TRUE	TRUE	101	411	24.5742	Tmito	AIF|CMT2D|CMTX4|COWCK|COXPD6|NADMR|NAMSD|PDCD8|O95831	ENSG00000156709
MRPL10	Isoform 2 of 39S ribosomal protein L10, mitochondrial OS=Homo sapiens GN=MRPL10	4	4	17			13000000	12000000	15000000	19000000	0	14750000	100	6.64386	0.0024509	2.61067	17000000	12500000	100	100	6.64386	6.64386	4	TRUE	TRUE	TRUE	8	411	1.94647	Tmito	L10MT|MRP-L10|MRP-L8|MRPL8|RPML8|Q7Z7H8	ENSG00000159111
NDUFS8	NADH dehydrogenase [ubiquinone] iron-sulfur protein 8, mitochondrial OS=Homo sapiens GN=NDUFS8 PE=1 SV=1	1	1	1					3500000		0	875000	100	6.64386	0.391002	0.407821	1750000	0	100	0	6.64386		1	FALSE	FALSE	FALSE	7	411	1.70316	Tmito	CI-23k|CI23KD|TYKY|O00217	ENSG00000110717
NDUFS2	NADH dehydrogenase [ubiquinone] iron-sulfur protein 2, mitochondrial OS=Homo sapiens GN=NDUFS2 PE=1 SV=2	1	1	1					4400000		0	1100000	100	6.64386	0.391002	0.407821	2200000	0	100	0	6.64386		1	FALSE	FALSE	FALSE	14	411	3.40633	Tmito	CI-49|O75306	ENSG00000158864
NDUFV1	NADH dehydrogenase [ubiquinone] flavoprotein 1, mitochondrial OS=Homo sapiens GN=NDUFV1 PE=1 SV=4	2	2	6			5400000	4100000	5100000	5900000	0	5125000	100	6.64386	0.000877488	3.05676	5500000	4750000	100	100	6.64386	6.64386	4	TRUE	FALSE	TRUE	6	411	1.45985	Tmito	CI-51K|CI51KD|UQOR1|P49821	ENSG00000167792
ACO2	Aconitate hydratase, mitochondrial OS=Homo sapiens GN=ACO2 PE=2 SV=1	1	1	3		2400000		3500000		2600000	1200000	1525000	1.27083	0.345775	0.846837	0.0722004	1300000	1750000	1.08333	1.45833	0.115477	0.544321	2	FALSE	FALSE	FALSE	27	411	6.56934	Tmito	ACONM|ICRD|Q99798	ENSG00000100412
FECH	Isoform 2 of Ferrochelatase, mitochondrial OS=Homo sapiens GN=FECH	13	13	83	72000000	60000000	48000000	44000000	56000000	48000000	66000000	49000000	0.742424	-0.429684	0.175059	0.756816	52000000	46000000	0.787879	0.69697	-0.343954	-0.520832	4	FALSE	TRUE	TRUE	5	411	1.21655	Tmito	EPP|FCE|P22830	ENSG00000066926
PHB	Prohibitin OS=Homo sapiens GN=PHB PE=1 SV=1	7	7	34	17000000	15000000	15000000	15000000	22000000	25000000	16000000	19250000	1.20312	0.266787	0.302347	0.519495	23500000	15000000	1.46875	0.9375	0.554589	-0.0931094	4	FALSE	TRUE	TRUE	85	411	20.6813	Tmito	HEL-215|HEL-S-54e|PHB1|P35232	ENSG00000167085
MRPS2	28S ribosomal protein S2, mitochondrial OS=Homo sapiens GN=MRPS2 PE=1 SV=1	1	1	1			6200000				0	1550000	100	6.64386	0.391002	0.407821	0	3100000	0	100		6.64386	1	FALSE	FALSE	FALSE	19	411	4.62287	Tmito	MRP-S2|S2mt|Q9Y399	ENSG00000122140
HSPA9	Stress-70 protein, mitochondrial OS=Homo sapiens GN=HSPA9 PE=1 SV=2	22	22	379	240000000	230000000	160000000	130000000	180000000	160000000	235000000	157500000	0.670213	-0.577309	0.00266431	2.57442	170000000	145000000	0.723404	0.617021	-0.467126	-0.696608	4	TRUE	TRUE	TRUE	307	411	74.6959	Tmito	CSA|GRP-75|GRP75|HEL-S-124m|HSPA9B|MOT|MOT2|MTHSP75|PBP74|P38646	ENSG00000113013
PRDX3	Thioredoxin-dependent peroxide reductase, mitochondrial OS=Homo sapiens GN=PRDX3 PE=1 SV=3	7	7	57	40000000	41000000	47000000	49000000	57000000	64000000	40500000	54250000	1.33951	0.421701	0.0376964	1.4237	60500000	48000000	1.49383	1.18519	0.579013	0.245112	4	TRUE	TRUE	TRUE	137	411	33.3333	Tmito	AOP-1|AOP1|HBC189|MER5|PRO1748|SP-22|prx-III|P30048	ENSG00000165672
TIMM13	Mitochondrial import inner membrane translocase subunit Tim13 OS=Homo sapiens GN=TIMM13 PE=1 SV=1	3	3	11	12000000	14000000	15000000	11000000	17000000	16000000	13000000	14750000	1.13462	0.182203	0.353172	0.452014	16500000	13000000	1.26923	1	0.343954	0	4	FALSE	TRUE	TRUE	65	411	15.8151	Tmito	TIM13|TIM13B|TIMM13A|TIMM13B|ppv1|Q9Y5L4	ENSG00000099800
LYRM4	LYR motif-containing protein 4 OS=Homo sapiens GN=LYRM4 PE=1 SV=1	7	7	73			390000000	390000000	420000000	460000000	0	415000000	100	6.64386	0.000139905	3.85417	440000000	390000000	100	100	6.64386	6.64386	4	TRUE	TRUE	TRUE	2	411	0.486618	Tmito	C6orf149|CGI-203|COXPD19|ISD11|RP11-428J1.4|Q9HD34	ENSG00000214113
MRPL16	39S ribosomal protein L16, mitochondrial OS=Homo sapiens GN=MRPL16 PE=1 SV=1	1	1	1			14000000				0	3500000	100	6.64386	0.391002	0.407821	0	7000000	0	100		6.64386	1	FALSE	FALSE	FALSE	13	411	3.16302	Tmito	L16mt|MRP-L16|Q9NX20	ENSG00000166902
MRPL40	39S ribosomal protein L40, mitochondrial OS=Homo sapiens GN=MRPL40 PE=1 SV=1	2	2	3			26000000		34000000	8900000	0	17225000	100	6.64386	0.113363	0.945527	21450000	13000000	100	100	6.64386	6.64386	3	FALSE	FALSE	FALSE	5	411	1.21655	Tmito	MRP-L22|MRPL22|NLVCF|URIM|Q9NQ50	ENSG00000185608
TXN2	Thioredoxin, mitochondrial OS=Homo sapiens GN=TXN2 PE=1 SV=2	1	1	4			8000000	8700000	9100000	12000000	0	9450000	100	6.64386	0.00172598	2.76296	10550000	8350000	100	100	6.64386	6.64386	4	TRUE	FALSE	FALSE	0	411	0	Tmito	MT-TRX|MTRX|TRX2|Q99757	ENSG00000100348
MRPS18A	Isoform 2 of 28S ribosomal protein S18a, mitochondrial OS=Homo sapiens GN=MRPS18A	2	2	4				4100000	4700000	12000000	0	5200000	100	6.64386	0.128558	0.890901	8350000	2050000	100	100	6.64386	6.64386	3	FALSE	FALSE	FALSE	11	411	2.6764	Tmito	HumanS18b|MRP-S18-3|MRPS18-3|S18bmt|Q9NVS2	ENSG00000096080
NDUFB9	NADH dehydrogenase [ubiquinone] 1 beta subcomplex subunit 9 OS=Homo sapiens GN=NDUFB9 PE=1 SV=3	6	6	42			110000000	92000000	90000000	93000000	0	96250000	100	6.64386	0.000242752	3.61484	91500000	101000000	100	100	6.64386	6.64386	4	TRUE	TRUE	TRUE	2	411	0.486618	Tmito	B22|CI-B22|LYRM3|UQOR22|Q9Y6M9	ENSG00000147684
NDUFA6	NADH dehydrogenase [ubiquinone] 1 alpha subcomplex subunit 6 OS=Homo sapiens GN=NDUFA6 PE=1 SV=3	5	5	79	7400000	8400000	960000000	1000000000	990000000	880000000	7900000	957500000	121.203	6.92128	5.13971e-05	4.28906	935000000	980000000	118.354	124.051	6.88697	6.95479	4	TRUE	TRUE	TRUE	3	411	0.729927	Tmito	B14|CI-B14|LYRM6|NADHB14|P56556	ENSG00000184983
MRPL1	39S ribosomal protein L1, mitochondrial OS=Homo sapiens GN=MRPL1 PE=1 SV=2	5	5	29	4100000		24000000	21000000	28000000	25000000	2050000	24500000	11.9512	3.57909	0.0110226	1.95771	26500000	22500000	12.9268	10.9756	3.6923	3.45623	4	TRUE	TRUE	TRUE	13	411	3.16302	Tmito	BM022|L1MT|MRP-L1|Q9BYD6	ENSG00000169288
TIMM44	Mitochondrial import inner membrane translocase subunit TIM44 OS=Homo sapiens GN=TIMM44 PE=1 SV=2	7	7	33	16000000	19000000	29000000	23000000	27000000	30000000	17500000	27250000	1.55714	0.638901	0.0189055	1.72341	28500000	26000000	1.62857	1.48571	0.703607	0.571157	4	TRUE	TRUE	TRUE	40	411	9.73236	Tmito	TIM44|O43615	ENSG00000104980
COX17	Cytochrome c oxidase copper chaperone OS=Homo sapiens GN=COX17 PE=4 SV=1	1	1	1		5200000					2600000	0	0		0.5	0.30103	0	0	0	0			0	FALSE	FALSE	FALSE	27	411	6.56934	Tmito	Q14061	ENSG00000138495
COX6B1	Cytochrome c oxidase subunit 6B1 OS=Homo sapiens GN=COX6B1 PE=1 SV=2	2	2	3	7000000					7800000	3500000	1950000	0.557143	-0.843881	0.742617	0.129235	3900000	0	1.11429	0	0.156119		1	FALSE	FALSE	FALSE	9	411	2.18978	Tmito	COX6B|COXG|COXVIb1|P14854	ENSG00000126267
ACAT1	Acetyl-CoA acetyltransferase, mitochondrial OS=Homo sapiens GN=ACAT1 PE=1 SV=1	5	5	16			21000000	19000000	18000000	19000000	0	19250000	100	6.64386	7.66972e-05	4.11522	18500000	20000000	100	100	6.64386	6.64386	4	TRUE	TRUE	TRUE	63	411	15.3285	Tmito	ACAT|MAT|T2|THIL|P24752	ENSG00000075239
MALSU1	Mitochondrial assembly of ribosomal large subunit protein 1 OS=Homo sapiens GN=MALSU1 PE=1 SV=1	4	4	31			140000000	95000000	110000000	130000000	0	118750000	100	6.64386	0.00131378	2.88148	120000000	117500000	100	100	6.64386	6.64386	4	TRUE	TRUE	TRUE	1	411	0.243309	Tmito	C7orf30|mtRsfA|Q96EH3	ENSG00000156928
CLPX	ATP-dependent Clp protease ATP-binding subunit clpX-like, mitochondrial OS=Homo sapiens GN=CLPX PE=1 SV=2	12	12	48	7100000	6600000	16000000	14000000	19000000	18000000	6850000	16750000	2.44526	1.28999	0.00221616	2.6544	18500000	15000000	2.70073	2.18978	1.43335	1.13079	4	TRUE	TRUE	TRUE	23	411	5.59611	Tmito	O76031	ENSG00000166855
MRPL4	39S ribosomal protein L4, mitochondrial OS=Homo sapiens GN=MRPL4 PE=1 SV=1	5	5	23	18000000	18000000	24000000	26000000	24000000	30000000	18000000	26000000	1.44444	0.530515	0.0109377	1.96108	27000000	25000000	1.5	1.38889	0.584963	0.473931	4	TRUE	TRUE	TRUE	15	411	3.64964	Tmito	CGI-28|L4mt|Q9BYD3	ENSG00000105364
C1QBP	Complement component 1 Q subcomponent-binding protein, mitochondrial OS=Homo sapiens GN=C1QBP PE=1 SV=1	9	9	149	390000000	500000000	330000000	390000000	400000000	440000000	445000000	390000000	0.876404	-0.190331	0.489815	0.309968	420000000	360000000	0.94382	0.808989	-0.083416	-0.305808	4	FALSE	TRUE	TRUE	223	411	54.2579	Tmito	GC1QBP|HABP1|SF2p32|gC1Q-R|gC1qR|p32|Q07021	ENSG00000108561
PITRM1	Isoform 2 of Presequence protease, mitochondrial OS=Homo sapiens GN=PITRM1	13	13	35			16000000	15000000	17000000	14000000	0	15500000	100	6.64386	0.00015829	3.80055	15500000	15500000	100	100	6.64386	6.64386	4	TRUE	TRUE	TRUE	11	411	2.6764	Tmito	MP1|PreP|Q5JRX3	ENSG00000107959
UQCC1	Ubiquinol-cytochrome-c reductase complex assembly factor 1 OS=Homo sapiens GN=UQCC1 PE=1 SV=3	2	2	5			7800000	9400000	13000000	8100000	0	9575000	100	6.64386	0.00404143	2.39347	10550000	8600000	100	100	6.64386	6.64386	4	TRUE	FALSE	TRUE	0	411	0	Tmito	BFZB|C20orf44|CBP3|UQCC|Q9NVA1	ENSG00000101019
MRPL55	Isoform 2 of 39S ribosomal protein L55, mitochondrial OS=Homo sapiens GN=MRPL55	1	1	4			23000000	22000000	22000000	22000000	0	22250000	100	6.64386	3.12682e-06	5.5049	22000000	22500000	100	100	6.64386	6.64386	4	TRUE	FALSE	FALSE	1	411	0.243309	Tmito	AAVG5835|L55nt|MRP-L55|PRO19675|Q7Z7F7	ENSG00000162910
MECR	Trans-2-enoyl-CoA reductase, mitochondrial OS=Homo sapiens GN=MECR PE=1 SV=2	1	1	4		4700000	8900000	9600000	9700000		2350000	7050000	3	1.58496	0.252507	0.597727	4850000	9250000	2.06383	3.93617	1.04532	1.97679	3	FALSE	FALSE	FALSE	1	411	0.243309	Tmito	CGI-63|FASN2B|NRBF1|Q9BV79	ENSG00000116353
MRPL44	39S ribosomal protein L44, mitochondrial OS=Homo sapiens GN=MRPL44 PE=1 SV=1	8	8	33			16000000	17000000	21000000	22000000	0	19000000	100	6.64386	0.00100368	2.99841	21500000	16500000	100	100	6.64386	6.64386	4	TRUE	TRUE	TRUE	10	411	2.43309	Tmito	COXPD16|L44MT|MRP-L44|Q9H9J2	ENSG00000135900
HSDL2	Hydroxysteroid dehydrogenase-like protein 2 OS=Homo sapiens GN=HSDL2 PE=1 SV=1	3	3	8	3400000		8300000	5500000	7400000	8400000	1700000	7400000	4.35294	2.12199	0.146028	0.835564	7900000	6900000	4.64706	4.05882	2.21632	2.02106	4	FALSE	TRUE	TRUE	15	411	3.64964	Tmito	C9orf99|SDR13C1|Q6YN16	ENSG00000119471
MRPS14	28S ribosomal protein S14, mitochondrial OS=Homo sapiens GN=MRPS14 PE=1 SV=1	1	1	2	3600000	4400000					4000000	0	0		0.063451	1.19756	0	0	0	0			0	FALSE	FALSE	FALSE	16	411	3.89294	Tmito	DJ262D12.2|HSMRPS14|MRP-S14|S14mt|O60783	ENSG00000120333
ATPAF2	ATP synthase mitochondrial F1 complex assembly factor 2 OS=Homo sapiens GN=ATPAF2 PE=1 SV=1	18	18	215			800000000	860000000	770000000	860000000	0	822500000	100	6.64386	4.50238e-05	4.34656	815000000	830000000	100	100	6.64386	6.64386	4	TRUE	TRUE	TRUE	3	411	0.729927	Tmito	ATP12|ATP12p|MC5DN1|Q8N5M1	ENSG00000171953
COA6	Isoform 2 of Cytochrome c oxidase assembly factor 6 homolog OS=Homo sapiens GN=COA6	2	2	10	11000000	11000000	13000000	11000000	10000000	12000000	11000000	11500000	1.04545	0.0641303	0.495025	0.305373	11000000	12000000	1	1.09091	0	0.125531	4	FALSE	FALSE	TRUE	11	411	2.6764	Tmito	C1orf31|Q5JTJ3	ENSG00000168275
POLRMT	DNA-directed RNA polymerase, mitochondrial OS=Homo sapiens GN=POLRMT PE=1 SV=2	1	1	1			11000000				0	2750000	100	6.64386	0.391002	0.407821	0	5500000	0	100		6.64386	1	FALSE	FALSE	FALSE	30	411	7.29927	Tmito	APOLMT|MTRNAP|MTRPOL|h-mtRPOL|O00411	ENSG00000099821
ISCU	Iron-sulfur cluster assembly enzyme ISCU, mitochondrial OS=Homo sapiens GN=ISCU PE=1 SV=2	5	5	46			250000000	160000000	280000000	260000000	0	237500000	100	6.64386	0.00295584	2.52932	270000000	205000000	100	100	6.64386	6.64386	4	TRUE	TRUE	TRUE	0	411	0	Tmito	2310020H20Rik|HML|ISU2|NIFU|NIFUN|hnifU|Q9H1K1	ENSG00000136003
RTN4IP1	Reticulon-4-interacting protein 1, mitochondrial OS=Homo sapiens GN=RTN4IP1 PE=1 SV=2	1	1	3	5600000	5300000	6900000				5450000	1725000	0.316514	-1.65966	0.119227	0.923626	0	3450000	0	0.633028		-0.65966	1	FALSE	FALSE	FALSE	5	411	1.21655	Tmito	NIMP|Q8WWV3	ENSG00000130347
ATP5C1	ATP synthase subunit gamma, mitochondrial OS=Homo sapiens GN=ATP5C1 PE=1 SV=1	8	8	39	17000000	21000000	27000000	24000000	34000000	35000000	19000000	30000000	1.57895	0.658963	0.0329934	1.48157	34500000	25500000	1.81579	1.34211	0.860597	0.424498	4	TRUE	TRUE	TRUE	68	411	16.545	Tmito	ATP5C|ATP5CL1|P36542	ENSG00000165629
SLC25A11	Mitochondrial 2-oxoglutarate/malate carrier protein OS=Homo sapiens GN=SLC25A11 PE=1 SV=3	1	1	3				3900000	7700000	7100000	0	4675000	100	6.64386	0.0773227	1.11169	7400000	1950000	100	100	6.64386	6.64386	3	FALSE	FALSE	FALSE	55	411	13.382	Tmito	OGC|SLC20A4|Q02978	ENSG00000108528
TIMM8B	Mitochondrial import inner membrane translocase subunit Tim8 B OS=Homo sapiens GN=TIMM8B PE=4 SV=1	1	1	1						9700000	0	2425000	100	6.64386	0.391002	0.407821	4850000	0	100	0	6.64386		1	FALSE	FALSE	FALSE	8	411	1.94647	Tmito	DDP2|TIM8B|Q9Y5J9	ENSG00000150779
MCAT	Malonyl-CoA-acyl carrier protein transacylase, mitochondrial OS=Homo sapiens GN=MCAT PE=1 SV=2	2	2	6			15000000	14000000	12000000	15000000	0	14000000	100	6.64386	0.000281558	3.55043	13500000	14500000	100	100	6.64386	6.64386	4	TRUE	FALSE	TRUE	0	411	0	Tmito	FASN2C|MCT|MT|NET62|fabD|Q8IVS2	ENSG00000100294
IBA57	Putative transferase CAF17, mitochondrial OS=Homo sapiens GN=IBA57 PE=1 SV=1	2	2	6			6200000	9100000	10000000	9200000	0	8625000	100	6.64386	0.0019222	2.7162	9600000	7650000	100	100	6.64386	6.64386	4	TRUE	FALSE	TRUE	7	411	1.70316	Tmito	C1orf69|MMDS3|Q5T440	ENSG00000181873
PHB2	Prohibitin-2 OS=Homo sapiens GN=PHB2 PE=2 SV=1	8	8	40	23000000	22000000	18000000	23000000	31000000	35000000	22500000	26750000	1.18889	0.249614	0.350048	0.455873	33000000	20500000	1.46667	0.911111	0.552541	-0.134301	4	FALSE	TRUE	TRUE	95	411	23.1144	Tmito	BAP|BCAP37|Bap37|PNAS-141|REA|p22|Q99623	ENSG00000215021
DAP3	28S ribosomal protein S29, mitochondrial OS=Homo sapiens GN=DAP3 PE=1 SV=1	3	3	7	4600000	6400000		2700000	3400000	3300000	5500000	2350000	0.427273	-1.22677	0.0900763	1.04539	3350000	1350000	0.609091	0.245455	-0.715271	-2.02647	3	FALSE	TRUE	TRUE	41	411	9.97567	Tmito	DAP-3|MRP-S29|MRPS29|bMRP-10|P51398	ENSG00000132676
SDHAF1	Succinate dehydrogenase assembly factor 1, mitochondrial OS=Homo sapiens GN=SDHAF1 PE=1 SV=1	4	4	8			74000000	91000000	52000000	86000000	0	75750000	100	6.64386	0.00317083	2.49883	69000000	82500000	100	100	6.64386	6.64386	4	TRUE	TRUE	TRUE	0	411	0	Tmito	LYRM8|A6NFY7	ENSG00000205138
MRPS17	28S ribosomal protein S17, mitochondrial OS=Homo sapiens GN=MRPS17 PE=3 SV=1	1	1	1		4600000					2300000	0	0		0.5	0.30103	0	0	0	0			0	FALSE	FALSE	FALSE	11	411	2.6764	Tmito	HSPC011|MRP-S17|RPMS17|S17mt|Q9Y2R5	ENSG00000239789
NFS1	Cysteine desulfurase, mitochondrial OS=Homo sapiens GN=NFS1 PE=1 SV=3	21	21	496			500000000	480000000	620000000	760000000	0	590000000	100	6.64386	0.00276817	2.55781	690000000	490000000	100	100	6.64386	6.64386	4	TRUE	TRUE	TRUE	10	411	2.43309	Tmito	IscS|NIFS|Q9Y697	ENSG00000244005
NDUFAF5	NADH dehydrogenase [ubiquinone] 1 alpha subcomplex assembly factor 5 OS=Homo sapiens GN=NDUFAF5 PE=1 SV=1	11	11	73			150000000	150000000	170000000	160000000	0	157500000	100	6.64386	6.17183e-05	4.20959	165000000	150000000	100	100	6.64386	6.64386	4	TRUE	TRUE	TRUE	2	411	0.486618	Tmito	C20orf7|bA526K24.2|dJ842G6.1|Q5TEU4	ENSG00000101247
MRPL17	39S ribosomal protein L17, mitochondrial OS=Homo sapiens GN=MRPL17 PE=1 SV=1	3	3	7			12000000			12000000	0	6000000	100	6.64386	0.18169	0.740669	6000000	6000000	100	100	6.64386	6.64386	2	FALSE	TRUE	TRUE	4	411	0.973236	Tmito	L17mt|LIP2|MRP-L17|MRP-L26|RPL17L|RPML26|Q9NRX2	ENSG00000158042
TACO1	Translational activator of cytochrome c oxidase 1 OS=Homo sapiens GN=TACO1 PE=1 SV=1	1	1	3			12000000	9200000	12000000		0	8300000	100	6.64386	0.0615896	1.21049	6000000	10600000	100	100	6.64386	6.64386	3	FALSE	FALSE	FALSE	9	411	2.18978	Tmito	CCDC44|Q9BSH4	ENSG00000136463
MRPL11	39S ribosomal protein L11, mitochondrial OS=Homo sapiens GN=MRPL11 PE=1 SV=1	7	7	28	4800000		16000000	16000000	22000000	19000000	2400000	18250000	7.60417	2.92679	0.0389598	1.40938	20500000	16000000	8.54167	6.66667	3.09452	2.73697	4	TRUE	TRUE	TRUE	11	411	2.6764	Tmito	L11MT|MRP-L11|Q9Y3B7	ENSG00000174547
MRPL13	39S ribosomal protein L13, mitochondrial OS=Homo sapiens GN=MRPL13 PE=1 SV=1	4	4	13			15000000	14000000	20000000	21000000	0	17500000	100	6.64386	0.00214964	2.66763	20500000	14500000	100	100	6.64386	6.64386	4	TRUE	TRUE	TRUE	11	411	2.6764	Tmito	L13|L13A|L13mt|RPL13|RPML13|Q9BYD1	ENSG00000172172
MRPL33	39S ribosomal protein L33, mitochondrial OS=Homo sapiens GN=MRPL33 PE=1 SV=1	1	1	1				15000000			0	3750000	100	6.64386	0.391002	0.407821	0	7500000	0	100		6.64386	1	FALSE	FALSE	FALSE	0	411	0	Tmito	C2orf1|L33mt|MRP-L33|RPL33L|O75394	ENSG00000243147
NDUFA5	NADH dehydrogenase [ubiquinone] 1 alpha subcomplex subunit 5 OS=Homo sapiens GN=NDUFA5 PE=1 SV=3	2	2	7		4100000	4900000	6400000	4800000	5900000	2050000	5500000	2.68293	1.42381	0.333668	0.476685	5350000	5650000	2.60976	2.7561	1.38391	1.46263	4	FALSE	FALSE	TRUE	13	411	3.16302	Tmito	B13|CI-13KD-B|CI-13kB|NUFM|UQOR13|Q16718	ENSG00000128609
TIMM50	Isoform 2 of Mitochondrial import inner membrane translocase subunit TIM50 OS=Homo sapiens GN=TIMM50	1	1	1						7600000	0	1900000	100	6.64386	0.391002	0.407821	3800000	0	100	0	6.64386		1	FALSE	FALSE	FALSE	124	411	30.1703	Tmito	TIM50|TIM50L|Q3ZCQ8	ENSG00000105197
ECH1	Delta(3,5)-Delta(2,4)-dienoyl-CoA isomerase, mitochondrial OS=Homo sapiens GN=ECH1 PE=1 SV=2	3	3	4	6400000	6400000	6700000	6600000			6400000	3325000	0.519531	-0.944718	0.207535	0.682909	0	6650000	0	1.03906		0.0552824	2	FALSE	TRUE	FALSE	65	411	15.8151	Tmito	HPXEL|Q13011	ENSG00000104823
ERAL1	GTPase Era, mitochondrial OS=Homo sapiens GN=ERAL1 PE=1 SV=2	1	1	1		3200000					1600000	0	0		0.5	0.30103	0	0	0	0			0	FALSE	FALSE	FALSE	10	411	2.43309	Tmito	ERA|ERAL1A|H-ERA|HERA-A|HERA-B|O75616	ENSG00000132591
CMC1	COX assembly mitochondrial protein homolog (Fragment) OS=Homo sapiens GN=CMC1 PE=4 SV=1	1	1	1	2300000						1150000	0	0		0.5	0.30103	0	0	0	0			0	FALSE	FALSE	FALSE	7	411	1.70316	Tmito	C3orf68|Q7Z7K0	ENSG00000187118
MRPL28	39S ribosomal protein L28, mitochondrial OS=Homo sapiens GN=MRPL28 PE=1 SV=4	3	3	5			21000000		23000000	14000000	0	14500000	100	6.64386	0.0686337	1.16346	18500000	10500000	100	100	6.64386	6.64386	3	FALSE	TRUE	TRUE	12	411	2.91971	Tmito	MAAT1|p15|Q13084	ENSG00000086504
NFU1	NFU1 iron-sulfur cluster scaffold homolog, mitochondrial OS=Homo sapiens GN=NFU1 PE=1 SV=2	2	2	2			12000000			7600000	0	4900000	100	6.64386	0.197334	0.704797	3800000	6000000	100	100	6.64386	6.64386	2	FALSE	FALSE	FALSE	0	411	0	Tmito	HIRIP|HIRIP5|MMDS1|NIFUC|Nfu|NifU|Q9UMS0	ENSG00000169599
YARS2	Tyrosine--tRNA ligase, mitochondrial OS=Homo sapiens GN=YARS2 PE=1 SV=2	1	1	1					3300000		0	825000	100	6.64386	0.391002	0.407821	1650000	0	100	0	6.64386		1	FALSE	FALSE	FALSE	16	411	3.89294	Tmito	MLASA2|MT-TYRRS|TYRRS|Q9Y2Z4	ENSG00000139131
MRPL21	39S ribosomal protein L21, mitochondrial OS=Homo sapiens GN=MRPL21 PE=1 SV=2	3	3	6			14000000	7500000	11000000	17000000	0	12375000	100	6.64386	0.00892683	2.0493	14000000	10750000	100	100	6.64386	6.64386	4	TRUE	TRUE	TRUE	6	411	1.45985	Tmito	L21mt|MRP-L21|Q7Z2W9	ENSG00000197345
NDUFB10	NADH dehydrogenase [ubiquinone] 1 beta subcomplex subunit 10 OS=Homo sapiens GN=NDUFB10 PE=1 SV=3	2	2	2			3800000			2800000	0	1650000	100	6.64386	0.188914	0.723735	1400000	1900000	100	100	6.64386	6.64386	2	FALSE	FALSE	FALSE	10	411	2.43309	Tmito	PDSW|O96000	ENSG00000140990
MRPS9	28S ribosomal protein S9, mitochondrial OS=Homo sapiens GN=MRPS9 PE=1 SV=2	1	1	1						5200000	0	1300000	100	6.64386	0.391002	0.407821	2600000	0	100	0	6.64386		1	FALSE	FALSE	FALSE	27	411	6.56934	Tmito	MRP-S9|RPMS9|S9mt|P82933	ENSG00000135972
ADCK3	Chaperone activity of bc1 complex-like, mitochondrial OS=Homo sapiens GN=ADCK3 PE=1 SV=1	4	4	10		2600000	6200000	4500000	6700000	7600000	1300000	6250000	4.80769	2.26534	0.109364	0.961126	7150000	5350000	5.5	4.11538	2.45943	2.04103	4	FALSE	TRUE	TRUE	11	411	2.6764	Tmito	ARCA2|CABC1|COQ10D4|COQ8|SCAR9|Q8NI60	ENSG00000163050
ACADVL	Isoform 3 of Very long-chain specific acyl-CoA dehydrogenase, mitochondrial OS=Homo sapiens GN=ACADVL	10	10	29	15000000	14000000	13000000	11000000	14000000	8700000	14500000	11675000	0.805172	-0.31263	0.0941303	1.02627	11350000	12000000	0.782759	0.827586	-0.353361	-0.273018	4	FALSE	TRUE	TRUE	29	411	7.05596	Tmito	ACAD6|LCACD|VLCAD|P49748	ENSG00000072778
MRPL15	39S ribosomal protein L15, mitochondrial OS=Homo sapiens GN=MRPL15 PE=1 SV=1	7	7	19			24000000	20000000	15000000	26000000	0	21250000	100	6.64386	0.00314171	2.50283	20500000	22000000	100	100	6.64386	6.64386	4	TRUE	TRUE	TRUE	13	411	3.16302	Tmito	L15mt|MRP-L15|MRP-L7|RPML7|Q9P015	ENSG00000137547
MRPL24	39S ribosomal protein L24, mitochondrial OS=Homo sapiens GN=MRPL24 PE=1 SV=1	4	4	15			18000000	21000000	24000000	25000000	0	22000000	100	6.64386	0.000803703	3.0949	24500000	19500000	100	100	6.64386	6.64386	4	TRUE	TRUE	TRUE	14	411	3.40633	Tmito	L24mt|MRP-L18|MRP-L24|Q96A35	ENSG00000143314
HSPD1	60 kDa heat shock protein, mitochondrial OS=Homo sapiens GN=HSPD1 PE=1 SV=2	29	29	411	400000000	430000000	410000000	420000000	430000000	450000000	415000000	427500000	1.03012	0.0428131	0.555714	0.255149	440000000	415000000	1.06024	1	0.0843922	0	4	FALSE	TRUE	TRUE	231	411	56.2044	Tmito	CPN60|GROEL|HLD4|HSP-60|HSP60|HSP65|HuCHA60|SPG13|P10809	ENSG00000144381
NDUFS5	NADH dehydrogenase [ubiquinone] iron-sulfur protein 5 OS=Homo sapiens GN=NDUFS5 PE=1 SV=3	1	1	4	1300000	1600000			2400000	2700000	1450000	1275000	0.87931	-0.185556	0.83032	0.0807546	2550000	0	1.75862	0	0.814444		2	FALSE	FALSE	FALSE	1	411	0.243309	Tmito	CI-15k|CI15K|O43920	ENSG00000168653
CYCS	Cytochrome c OS=Homo sapiens GN=CYCS PE=1 SV=2	1	1	2		10000000	12000000				5000000	3000000	0.6	-0.736966	0.767936	0.114675	0	6000000	0	1.2		0.263034	1	FALSE	FALSE	FALSE	23	411	5.59611	Tmito	CYC|HCS|THC4|P99999	ENSG00000172115
LYRM7	Complex III assembly factor LYRM7 OS=Homo sapiens GN=LYRM7 PE=1 SV=1	5	5	98		3400000	1500000000	1400000000	1400000000	1400000000	1700000	1425000000	838.235	9.71121	1.10257e-05	4.9576	1400000000	1450000000	823.529	852.941	9.68568	9.7363	4	TRUE	TRUE	TRUE	1	411	0.243309	Tmito	C5orf31|MZM1L|Q5U5X0	ENSG00000186687
MRPS7	28S ribosomal protein S7, mitochondrial OS=Homo sapiens GN=MRPS7 PE=2 SV=1	2	2	9	7700000	8300000	15000000	11000000	14000000	10000000	8000000	12500000	1.5625	0.643856	0.0290966	1.53616	12000000	13000000	1.5	1.625	0.584963	0.70044	4	TRUE	FALSE	TRUE	29	411	7.05596	Tmito	MRP-S|MRP-S7|RP-S7|RPMS7|S7mt|bMRP27a|Q9Y2R9	ENSG00000125445
MRPL3	39S ribosomal protein L3, mitochondrial OS=Homo sapiens GN=MRPL3 PE=2 SV=1	4	4	15			15000000	18000000	23000000	14000000	0	17500000	100	6.64386	0.00323904	2.48958	18500000	16500000	100	100	6.64386	6.64386	4	TRUE	TRUE	TRUE	13	411	3.16302	Tmito	COXPD9|MRL3|RPML3|P09001	ENSG00000114686
MRPL49	39S ribosomal protein L49, mitochondrial OS=Homo sapiens GN=MRPL49 PE=1 SV=1	3	3	12			16000000	15000000	16000000	18000000	0	16250000	100	6.64386	0.000127304	3.89516	17000000	15500000	100	100	6.64386	6.64386	4	TRUE	TRUE	TRUE	13	411	3.16302	Tmito	C11orf4|L49mt|MRP-L49|NOF|NOF1|Q13405	ENSG00000149792
MRPL19	39S ribosomal protein L19, mitochondrial OS=Homo sapiens GN=MRPL19 PE=1 SV=2	6	6	16			13000000	13000000	16000000	20000000	0	15500000	100	6.64386	0.00259336	2.58614	18000000	13000000	100	100	6.64386	6.64386	4	TRUE	TRUE	TRUE	15	411	3.64964	Tmito	L19mt|MRP-L15|MRP-L19|MRPL15|RLX1|RP11-342K6.1|RPML15|P49406	ENSG00000115364
TRAP1	Heat shock protein 75 kDa, mitochondrial OS=Homo sapiens GN=TRAP1 PE=1 SV=3	21	22	137	46000000	55000000	120000000	110000000	130000000	140000000	50500000	125000000	2.47525	1.30757	0.000805593	3.09388	135000000	115000000	2.67327	2.27723	1.4186	1.18728	4	TRUE	TRUE	TRUE	118	411	28.7105	Tmito	HSP 75|HSP75|HSP90L|TRAP-1|Q12931	ENSG00000126602
L2HGDH	L-2-hydroxyglutarate dehydrogenase, mitochondrial OS=Homo sapiens GN=L2HGDH PE=1 SV=3	5	5	11	7200000	10000000	7200000	9400000	8800000	7800000	8600000	8300000	0.965116	-0.0512253	0.867569	0.0616959	8300000	8300000	0.965116	0.965116	-0.0512253	-0.0512253	4	FALSE	TRUE	TRUE	6	411	1.45985	Tmito	C14orf160|Q9H9P8	ENSG00000087299
MRPL20	39S ribosomal protein L20, mitochondrial OS=Homo sapiens GN=MRPL20 PE=1 SV=1	1	1	2			15000000		27000000		0	10500000	100	6.64386	0.206644	0.684777	13500000	7500000	100	100	6.64386	6.64386	2	FALSE	FALSE	FALSE	2	411	0.486618	Tmito	L20mt|MRP-L20|Q9BYC9	ENSG00000242485
SLC25A5	ADP/ATP translocase 2 OS=Homo sapiens GN=SLC25A5 PE=1 SV=7	2	5	26	6500000	8400000	13000000	13000000	18000000	27000000	7450000	17750000	2.38255	1.25251	0.0483726	1.3154	22500000	13000000	3.02013	1.74497	1.59461	0.803199	4	TRUE	FALSE	TRUE	223	411	54.2579	Tmito	2F1|AAC2|ANT2|T2|T3|P05141	ENSG00000005022
DNAJA3	DnaJ homolog subfamily A member 3, mitochondrial OS=Homo sapiens GN=DNAJA3 PE=1 SV=2	2	2	6	8100000	6000000		4600000	6100000	6800000	7050000	4375000	0.620567	-0.68834	0.224489	0.648806	6450000	2300000	0.914894	0.326241	-0.128324	-1.61599	3	FALSE	FALSE	TRUE	33	411	8.0292	Tmito	HCA57|TID1|hTID-1|Q96EY1	ENSG00000103423
MRPS34	28S ribosomal protein S34, mitochondrial OS=Homo sapiens GN=MRPS34 PE=2 SV=2	2	2	4	5800000	8700000	6600000		6200000		7250000	3200000	0.441379	-1.17991	0.166401	0.778845	3100000	3300000	0.427586	0.455172	-1.22571	-1.13551	2	FALSE	FALSE	FALSE	24	411	5.83942	Tmito	MRP-S12|MRP-S34|MRPS12|P82930	ENSG00000074071
ETFB	Isoform 2 of Electron transfer flavoprotein subunit beta OS=Homo sapiens GN=ETFB	10	10	54			64000000	61000000	62000000	61000000	0	62000000	100	6.64386	3.27e-06	5.48545	61500000	62500000	100	100	6.64386	6.64386	4	TRUE	TRUE	TRUE	24	411	5.83942	Tmito	MADD|P38117	ENSG00000105379
POLDIP2	Polymerase delta-interacting protein 2 OS=Homo sapiens GN=POLDIP2 PE=1 SV=1	9	9	39	9200000	7900000	22000000	22000000	22000000	21000000	8550000	21750000	2.54386	1.34702	0.0147981	1.8298	21500000	22000000	2.51462	2.5731	1.33034	1.36351	4	TRUE	TRUE	TRUE	36	411	8.75912	Tmito	PDIP38|POLD4|Q9Y2S7	ENSG00000004142
SLC25A10	Mitochondrial dicarboxylate carrier OS=Homo sapiens GN=SLC25A10 PE=2 SV=1	4	4	22	65000000	28000000	64000000	62000000	100000000	93000000	46500000	79750000	1.71505	0.778254	0.282667	0.548724	96500000	63000000	2.07527	1.35484	1.0533	0.438121	4	FALSE	TRUE	TRUE	32	411	7.78589	Tmito	DIC|Q9UBX3	ENSG00000183048
MRPL22	39S ribosomal protein L22, mitochondrial OS=Homo sapiens GN=MRPL22 PE=2 SV=1	3	3	11			21000000	15000000	21000000	22000000	0	19750000	100	6.64386	0.00114707	2.94041	21500000	18000000	100	100	6.64386	6.64386	4	TRUE	TRUE	TRUE	22	411	5.3528	Tmito	L22mt|MRP-L22|MRP-L25|RPML25|Q9NWU5	ENSG00000082515
MRPL47	39S ribosomal protein L47, mitochondrial OS=Homo sapiens GN=MRPL47 PE=1 SV=2	3	3	10			12000000	13000000	15000000	13000000	0	13250000	100	6.64386	0.000234195	3.63042	14000000	12500000	100	100	6.64386	6.64386	4	TRUE	TRUE	TRUE	16	411	3.89294	Tmito	L47mt|MRP-L47|NCM1|Q9HD33	ENSG00000136522
MRPL9	39S ribosomal protein L9, mitochondrial OS=Homo sapiens GN=MRPL9 PE=1 SV=2	2	2	9			7700000	9200000	14000000	14000000	0	11225000	100	6.64386	0.00628522	2.20168	14000000	8450000	100	100	6.64386	6.64386	4	TRUE	FALSE	TRUE	12	411	2.91971	Tmito	L9mt|Q9BYD2	ENSG00000143436
MRPS16	28S ribosomal protein S16, mitochondrial OS=Homo sapiens GN=MRPS16 PE=1 SV=1	1	1	5	4800000	3900000	6700000	5800000		6900000	4350000	4850000	1.11494	0.156969	0.785067	0.105093	3450000	6250000	0.793103	1.43678	-0.334419	0.522841	3	FALSE	FALSE	TRUE	7	411	1.70316	Tmito	COXPD2|MRP-S16|RPMS16|Q9Y3D3	ENSG00000182180
LYRM5	LYR motif-containing protein 5 OS=Homo sapiens GN=LYRM5 PE=2 SV=2	1	1	10			53000000	38000000	45000000	43000000	0	44750000	100	6.64386	0.000733941	3.13434	44000000	45500000	100	100	6.64386	6.64386	4	TRUE	FALSE	TRUE	0	411	0	Tpossible_mito	Q6IPR1	ENSG00000205707
SLIRP	SRA stem-loop-interacting RNA-binding protein, mitochondrial OS=Homo sapiens GN=SLIRP PE=2 SV=1	6	6	22	27000000	40000000	20000000	37000000	47000000	21000000	33500000	31250000	0.932836	-0.100305	0.82283	0.0846901	34000000	28500000	1.01493	0.850746	0.0213737	-0.233199	4	FALSE	TRUE	TRUE	53	411	12.8954	Tmito	C14orf156|DC50|PD04872|Q9GZT3	ENSG00000119705
NDUFA8	NADH dehydrogenase [ubiquinone] 1 alpha subcomplex subunit 8 OS=Homo sapiens GN=NDUFA8 PE=1 SV=3	1	1	2		4300000	3800000				2150000	950000	0.44186	-1.17834	0.678074	0.168723	0	1900000	0	0.883721		-0.178337	1	FALSE	FALSE	FALSE	4	411	0.973236	Tmito	CI-19KD|CI-PGIV|PGIV|P51970	ENSG00000119421
FAHD2A	Fumarylacetoacetate hydrolase domain-containing protein 2A OS=Homo sapiens GN=FAHD2A PE=1 SV=1	9	9	76	53000000	52000000	47000000	47000000	54000000	56000000	52500000	51000000	0.971429	-0.0418202	0.572705	0.242069	55000000	47000000	1.04762	0.895238	0.0671142	-0.159657	4	FALSE	TRUE	TRUE	1	411	0.243309	Tmito	Q96GK7	ENSG00000115042
LIPT2	Putative lipoyltransferase 2, mitochondrial OS=Homo sapiens GN=LIPT2 PE=3 SV=1	8	8	35			34000000	43000000	43000000	46000000	0	41500000	100	6.64386	0.000533566	3.27281	44500000	38500000	100	100	6.64386	6.64386	4	TRUE	TRUE	TRUE	0	411	0	Tpossible_mito	A6NK58	ENSG00000175536
MRPS26	28S ribosomal protein S26, mitochondrial OS=Homo sapiens GN=MRPS26 PE=1 SV=1	1	1	1						4600000	0	1150000	100	6.64386	0.391002	0.407821	2300000	0	100	0	6.64386		1	FALSE	FALSE	FALSE	20	411	4.86618	Tmito	C20orf193|GI008|MRP-S13|MRP-S26|MRPS13|NY-BR-87|RPMS13|dJ534B8.3|Q9BYN8	ENSG00000125901
STOML2	Stomatin-like protein 2, mitochondrial OS=Homo sapiens GN=STOML2 PE=1 SV=1	1	1	2			1500000			2700000	0	1050000	100	6.64386	0.206644	0.684777	1350000	750000	100	100	6.64386	6.64386	2	FALSE	FALSE	FALSE	32	411	7.78589	Tmito	SLP-2|Q9UJZ1	ENSG00000165283
GLDC	Glycine dehydrogenase (decarboxylating), mitochondrial OS=Homo sapiens GN=GLDC PE=1 SV=2	13	13	51			40000000	37000000	44000000	39000000	0	40000000	100	6.64386	0.000109362	3.96113	41500000	38500000	100	100	6.64386	6.64386	4	TRUE	TRUE	TRUE	2	411	0.486618	Tmito	GCE|GCSP|HYGN1|P23378	ENSG00000178445
SSBP1	Single-stranded DNA-binding protein, mitochondrial OS=Homo sapiens GN=SSBP1 PE=1 SV=1	6	6	83	130000000	120000000	120000000	95000000	130000000	130000000	125000000	118750000	0.95	-0.0740006	0.552772	0.257454	130000000	107500000	1.04	0.86	0.0565835	-0.217591	4	FALSE	TRUE	TRUE	78	411	18.9781	Tmito	Mt-SSB|SOSS-B1|SSBP|mtSSB|Q04837	ENSG00000106028
MRPL27	39S ribosomal protein L27, mitochondrial OS=Homo sapiens GN=MRPL27 PE=1 SV=1	1	1	1						12000000	0	3000000	100	6.64386	0.391002	0.407821	6000000	0	100	0	6.64386		1	FALSE	FALSE	FALSE	14	411	3.40633	Tmito	L27mt|Q9P0M9	ENSG00000108826
ATAD3A	Isoform 2 of ATPase family AAA domain-containing protein 3A OS=Homo sapiens GN=ATAD3A	2	2	2				1800000	5200000		0	1750000	100	6.64386	0.248679	0.604361	2600000	900000	100	100	6.64386	6.64386	2	FALSE	FALSE	FALSE	87	411	21.1679	Tmito	Q9NVI7	ENSG00000197785
MRPL37	39S ribosomal protein L37, mitochondrial OS=Homo sapiens GN=MRPL37 PE=1 SV=2	5	5	17			19000000	19000000	27000000	26000000	0	22750000	100	6.64386	0.00186466	2.7294	26500000	19000000	100	100	6.64386	6.64386	4	TRUE	TRUE	TRUE	21	411	5.10949	Tmito	L37mt|MRP-L2|MRP-L37|MRPL2|RPML2|Q9BZE1	ENSG00000116221
PTGES2	Prostaglandin E synthase 2 OS=Homo sapiens GN=PTGES2 PE=1 SV=1	7	7	33	16000000	18000000	16000000	13000000	19000000	15000000	17000000	15750000	0.926471	-0.110183	0.482769	0.31626	17000000	14500000	1	0.852941	0	-0.229482	4	FALSE	TRUE	TRUE	3	411	0.729927	Tmito	C9orf15|GBF-1|GBF1|PGES2|mPGES-2|Q9H7Z7	ENSG00000148334
MRPL41	39S ribosomal protein L41, mitochondrial OS=Homo sapiens GN=MRPL41 PE=1 SV=1	6	6	18		3100000	17000000	16000000	20000000	24000000	1550000	19250000	12.4194	3.63452	0.00310232	2.50831	22000000	16500000	14.1935	10.6452	3.82716	3.41213	4	TRUE	TRUE	TRUE	17	411	4.13625	Tmito	BMRP|MRP-L27|MRPL27|RPML27|Q8IXM3	ENSG00000182154
MRPL23	39S ribosomal protein L23, mitochondrial OS=Homo sapiens GN=MRPL23 PE=2 SV=1	2	2	6			15000000	20000000	12000000	13000000	0	15000000	100	6.64386	0.00350367	2.45548	12500000	17500000	100	100	6.64386	6.64386	4	TRUE	FALSE	TRUE	14	411	3.40633	Tmito	L23MRP|RPL23|RPL23L|Q16540	ENSG00000214026
MTHFD1L	Monofunctional C1-tetrahydrofolate synthase, mitochondrial OS=Homo sapiens GN=MTHFD1L PE=1 SV=1	12	12	35	4800000		13000000	13000000	16000000	15000000	2400000	14250000	5.9375	2.56986	0.10191	0.991783	15500000	13000000	6.45833	5.41667	2.69116	2.43741	4	FALSE	TRUE	TRUE	75	411	18.2482	Tmito	FTHFSDC1|MTC1THFS|dJ292B18.2|Q6UB35	ENSG00000120254
ECI2	Enoyl-CoA delta isomerase 2, mitochondrial OS=Homo sapiens GN=ECI2 PE=1 SV=4	2	2	4				2300000	3400000	3600000	0	2325000	100	6.64386	0.0670294	1.17373	3500000	1150000	100	100	6.64386	6.64386	3	FALSE	FALSE	FALSE	16	411	3.89294	Tmito	ACBD2|DRS-1|DRS1|HCA88|PECI|dJ1013A10.3|O75521	ENSG00000198721
UQCRB	Cytochrome b-c1 complex subunit 7 OS=Homo sapiens GN=UQCRB PE=1 SV=2	2	2	7	5400000	5100000	7300000	7700000	11000000	8400000	5250000	8600000	1.6381	0.712019	0.0256186	1.59145	9700000	7500000	1.84762	1.42857	0.885667	0.514573	4	TRUE	FALSE	TRUE	1	411	0.243309	Tmito	MC3DN3|QCR7|QP-C|QPC|UQBC|UQBP|UQCR6|UQPC|P14927	ENSG00000156467
ATP5H	ATP synthase subunit d, mitochondrial OS=Homo sapiens GN=ATP5H PE=1 SV=3	4	4	7			7300000	7500000	12000000	12000000	0	9700000	100	6.64386	0.00530512	2.2753	12000000	7400000	100	100	6.64386	6.64386	4	TRUE	TRUE	TRUE	28	411	6.81265	Tmito	ATPQ|O75947	ENSG00000167863
ATP5L	ATP synthase subunit g, mitochondrial OS=Homo sapiens GN=ATP5L PE=1 SV=3	3	3	10	4600000	5400000	9900000	8400000	11000000	12000000	5000000	10325000	2.065	1.04614	0.00369011	2.43296	11500000	9150000	2.3	1.83	1.20163	0.871844	4	TRUE	TRUE	TRUE	22	411	5.3528	Tmito	ATP5JG|O75964	ENSG00000167283
MCEE	Methylmalonyl-CoA epimerase, mitochondrial OS=Homo sapiens GN=MCEE PE=1 SV=1	1	1	1						13000000	0	3250000	100	6.64386	0.391002	0.407821	6500000	0	100	0	6.64386		1	FALSE	FALSE	FALSE	0	411	0	Tpossible_mito	GLOD2|Q96PE7	ENSG00000124370
DARS2	Aspartate--tRNA ligase, mitochondrial OS=Homo sapiens GN=DARS2 PE=1 SV=1	1	1	3				3600000	3500000	3300000	0	2600000	100	6.64386	0.0580257	1.23638	3400000	1800000	100	100	6.64386	6.64386	3	FALSE	FALSE	FALSE	28	411	6.81265	Tmito	ASPRS|LBSL|MT-ASPRS|RP3-383J4.2|Q6PI48	ENSG00000117593
MRPL51	39S ribosomal protein L51, mitochondrial OS=Homo sapiens GN=MRPL51 PE=1 SV=1	1	1	1						3800000	0	950000	100	6.64386	0.391002	0.407821	1900000	0	100	0	6.64386		1	FALSE	FALSE	FALSE	0	411	0	Tmito	HSPC241|MRP64|bMRP64|Q4U2R6	ENSG00000111639
MLYCD	Malonyl-CoA decarboxylase, mitochondrial OS=Homo sapiens GN=MLYCD PE=1 SV=3	3	3	6			9300000	3400000	9200000	8700000	0	7650000	100	6.64386	0.0125968	1.89974	8950000	6350000	100	100	6.64386	6.64386	4	TRUE	TRUE	TRUE	3	411	0.729927	Tmito	MCD|O95822	ENSG00000103150
PYURF	Protein preY, mitochondrial OS=Homo sapiens GN=PYURF PE=1 SV=1	2	2	10			7300000	12000000	6600000	18000000	0	10975000	100	6.64386	0.0250738	1.60078	12300000	9650000	100	100	6.64386	6.64386	4	TRUE	FALSE	TRUE	0	411	0	Tpossible_mito	PREY|Q96I23	ENSG00000145337
MRPL32	39S ribosomal protein L32, mitochondrial OS=Homo sapiens GN=MRPL32 PE=1 SV=1	2	2	7			22000000	21000000	18000000	22000000	0	20750000	100	6.64386	0.000207737	3.68249	20000000	21500000	100	100	6.64386	6.64386	4	TRUE	FALSE	TRUE	2	411	0.486618	Tmito	L32mt|MRP-L32|bMRP-59b|Q9BYC8	ENSG00000106591
TUFM	Elongation factor Tu, mitochondrial OS=Homo sapiens GN=TUFM PE=1 SV=2	8	8	25	14000000	13000000	8500000	8800000	8700000	9200000	13500000	8800000	0.651852	-0.617384	0.0496237	1.30431	8950000	8650000	0.662963	0.640741	-0.593	-0.642187	4	TRUE	TRUE	TRUE	139	411	33.82	Tmito	COXPD4|EF-TuMT|EFTU|P43|P49411	ENSG00000178952
TAMM41	Mitochondrial translocator assembly and maintenance protein 41 homolog OS=Homo sapiens GN=TAMM41 PE=1 SV=2	2	2	9	5000000	8700000	4700000	6700000	6000000	7400000	6850000	6200000	0.905109	-0.143836	0.786434	0.104337	6700000	5700000	0.978102	0.832117	-0.0319429	-0.265142	4	FALSE	FALSE	TRUE	6	411	1.45985	Tmito	C3orf31|RAM41|TAM41|Q96BW9	ENSG00000144559
NDUFAB1	Acyl carrier protein, mitochondrial OS=Homo sapiens GN=NDUFAB1 PE=1 SV=3	5	8	236			3500000000	4800000000	4700000000	5200000000	0	4550000000	100	6.64386	0.00112425	2.94914	4950000000	4150000000	100	100	6.64386	6.64386	4	TRUE	TRUE	TRUE	0	411	0	Tmito	ACP|FASN2A|SDAP|O14561	ENSG00000004779
NDUFAB1	Acyl carrier protein (Fragment) OS=Homo sapiens GN=NDUFAB1 PE=2 SV=1	2	5	78			1100000000	1100000000	610000000	650000000	0	865000000	100	6.64386	0.00785202	2.10502	630000000	1100000000	100	100	6.64386	6.64386	4	TRUE	FALSE	TRUE	0	411	0	Tmito	ACP|FASN2A|SDAP|O14561	ENSG00000004779
COA5	Cytochrome c oxidase assembly factor 5 OS=Homo sapiens GN=COA5 PE=1 SV=1	1	1	3			18000000	15000000	19000000		0	13000000	100	6.64386	0.0603193	1.21954	9500000	16500000	100	100	6.64386	6.64386	3	FALSE	FALSE	FALSE	0	411	0	Tmito	6330578E17Rik|C2orf64|Pet191|Q86WW8	ENSG00000183513
NDUFS3	NADH dehydrogenase [ubiquinone] iron-sulfur protein 3, mitochondrial OS=Homo sapiens GN=NDUFS3 PE=1 SV=1	4	4	12	3400000	3400000	4400000	5500000	7100000	7000000	3400000	6000000	1.76471	0.819428	0.0276473	1.55835	7050000	4950000	2.07353	1.45588	1.05209	0.541894	4	TRUE	TRUE	TRUE	19	411	4.62287	Tmito	CI-30|O75489	ENSG00000213619
MRPS25	28S ribosomal protein S25, mitochondrial OS=Homo sapiens GN=MRPS25 PE=1 SV=1	1	1	1				3400000			0	850000	100	6.64386	0.391002	0.407821	0	1700000	0	100		6.64386	1	FALSE	FALSE	FALSE	6	411	1.45985	Tmito	MRP-S25|RPMS25|P82663	ENSG00000131368
ACAD9	Acyl-CoA dehydrogenase family member 9, mitochondrial OS=Homo sapiens GN=ACAD9 PE=1 SV=1	18	18	68	8100000	11000000	26000000	26000000	27000000	29000000	9550000	27000000	2.82723	1.49939	0.0209003	1.67985	28000000	26000000	2.93194	2.72251	1.55185	1.44494	4	TRUE	TRUE	TRUE	11	411	2.6764	Tmito	NPD002|Q9H845	ENSG00000177646
DHRS4	Dehydrogenase/reductase SDR family member 4 OS=Homo sapiens GN=DHRS4 PE=1 SV=3	8	8	71	83000000	87000000	94000000	100000000	84000000	94000000	85000000	93000000	1.09412	0.129768	0.107871	0.967097	89000000	97000000	1.04706	1.14118	0.0663425	0.190522	4	FALSE	TRUE	TRUE	3	411	0.729927	Tpossible_mito	CR|NRDR|PHCR|PSCD|SCAD-SRL|SDR-SRL|SDR25C1|SDR25C2|Q9BTZ2	ENSG00000157326
GBAS	Protein NipSnap homolog 2 OS=Homo sapiens GN=GBAS PE=1 SV=1	1	1	5		16000000	23000000	21000000	24000000	21000000	8000000	22250000	2.78125	1.47573	0.323604	0.489986	22500000	22000000	2.8125	2.75	1.49185	1.45943	4	FALSE	FALSE	TRUE	13	411	3.16302	Tmito	NIPSNAP2|O75323	ENSG00000146729
MRPS30	28S ribosomal protein S30, mitochondrial OS=Homo sapiens GN=MRPS30 PE=1 SV=2	5	5	11			13000000	13000000	15000000	16000000	0	14250000	100	6.64386	0.000318343	3.4971	15500000	13000000	100	100	6.64386	6.64386	4	TRUE	TRUE	TRUE	14	411	3.40633	Tmito	MRP-S30|PAP|PDCD9|S30mt|Q9NP92	ENSG00000112996
HSD17B10	3-hydroxyacyl-CoA dehydrogenase type-2 OS=Homo sapiens GN=HSD17B10 PE=1 SV=3	12	12	89	18000000	14000000	27000000	35000000	34000000	37000000	16000000	33250000	2.07812	1.05528	0.00799363	2.09726	35500000	31000000	2.21875	1.9375	1.14975	0.954196	4	TRUE	TRUE	TRUE	107	411	26.0341	Tmito	17b-HSD10|ABAD|CAMR|DUPXp11.22|ERAB|HADH2|HCD2|MHBD|MRPP2|MRX17|MRX31|MRXS10|SCHAD|SDR5C1|Q99714	ENSG00000072506
ZADH2	Zinc-binding alcohol dehydrogenase domain-containing protein 2 OS=Homo sapiens GN=ZADH2 PE=1 SV=1	2	2	9	9300000	9500000	11000000	9900000	6200000	11000000	9400000	9525000	1.0133	0.0190583	0.919699	0.0363545	8600000	10450000	0.914894	1.1117	-0.128324	0.15277	4	FALSE	FALSE	TRUE	4	411	0.973236	Tpossible_mito	Q8N4Q0	ENSG00000180011
MRPL18	39S ribosomal protein L18, mitochondrial OS=Homo sapiens GN=MRPL18 PE=1 SV=1	1	1	4			5900000	5400000	8500000	7100000	0	6725000	100	6.64386	0.00230309	2.63769	7800000	5650000	100	100	6.64386	6.64386	4	TRUE	FALSE	FALSE	8	411	1.94647	Tmito	L18mt|MRP-L18|Q9H0U6	ENSG00000112110
CHCHD1	Coiled-coil-helix-coiled-coil-helix domain-containing protein 1 OS=Homo sapiens GN=CHCHD1 PE=1 SV=1	2	2	7	16000000	9800000			13000000	14000000	12900000	6750000	0.523256	-0.934412	0.290961	0.536166	13500000	0	1.04651	0	0.0655883		2	FALSE	FALSE	TRUE	26	411	6.32603	Tmito	C10orf34|C2360|MRP-S37|Q96BP2	ENSG00000172586
TIMM8A	Mitochondrial import inner membrane translocase subunit Tim8 A OS=Homo sapiens GN=TIMM8A PE=1 SV=1	1	1	5	6100000		5900000	7800000	6100000	8100000	3050000	6975000	2.28689	1.19338	0.415281	0.381658	7100000	6850000	2.32787	2.2459	1.21901	1.16729	4	FALSE	FALSE	TRUE	35	411	8.51582	Tmito	DDP|DDP1|DFN1|MTS|TIM8|O60220	ENSG00000126953
HSPE1	10 kDa heat shock protein, mitochondrial OS=Homo sapiens GN=HSPE1 PE=1 SV=2	2	2	16	43000000	39000000	37000000	30000000	32000000	28000000	41000000	31750000	0.77439	-0.368867	0.0472164	1.32591	30000000	33500000	0.731707	0.817073	-0.450661	-0.291463	4	TRUE	FALSE	TRUE	85	411	20.6813	Tmito	CPN10|EPF|GROES|HSP10|P61604	ENSG00000115541
MRPL54	39S ribosomal protein L54, mitochondrial OS=Homo sapiens GN=MRPL54 PE=1 SV=1	2	2	5			14000000	19000000	25000000	21000000	0	19750000	100	6.64386	0.00326472	2.48615	23000000	16500000	100	100	6.64386	6.64386	4	TRUE	FALSE	TRUE	14	411	3.40633	Tmito	L54mt|MRP-L54|Q6P161	ENSG00000183617
MRPL38	39S ribosomal protein L38, mitochondrial OS=Homo sapiens GN=MRPL38 PE=1 SV=2	6	6	14			13000000	12000000	12000000	16000000	0	13250000	100	6.64386	0.000789302	3.10276	14000000	12500000	100	100	6.64386	6.64386	4	TRUE	TRUE	TRUE	12	411	2.91971	Tmito	L38MT|MRP-L3|MRP-L38|RPML3|Q96DV4	ENSG00000204316
ICT1	Peptidyl-tRNA hydrolase ICT1, mitochondrial OS=Homo sapiens GN=ICT1 PE=1 SV=1	5	5	11	5800000		20000000	13000000	12000000	13000000	2900000	14500000	5	2.32193	0.0849926	1.07062	12500000	16500000	4.31034	5.68966	2.1078	2.50834	4	FALSE	TRUE	TRUE	17	411	4.13625	Tmito	DS-1|DS1|MRP-L58|Q14197	ENSG00000167862
PTCD3	Pentatricopeptide repeat domain-containing protein 3, mitochondrial OS=Homo sapiens GN=PTCD3 PE=1 SV=3	1	1	1	2800000						1400000	0	0		0.5	0.30103	0	0	0	0			0	FALSE	FALSE	FALSE	30	411	7.29927	Tmito	MRP-S39|Q96EY7	ENSG00000132300
RNMTL1	RNA methyltransferase-like protein 1 OS=Homo sapiens GN=RNMTL1 PE=1 SV=2	1	1	2			13000000			11000000	0	6000000	100	6.64386	0.183893	0.735435	5500000	6500000	100	100	6.64386	6.64386	2	FALSE	FALSE	FALSE	15	411	3.64964	Tmito	Q9HC36	ENSG00000171861
MRPL35	39S ribosomal protein L35, mitochondrial OS=Homo sapiens GN=MRPL35 PE=1 SV=3	1	1	4			13000000	12000000	11000000	14000000	0	12500000	100	6.64386	0.000300795	3.52173	12500000	12500000	100	100	6.64386	6.64386	4	TRUE	FALSE	FALSE	0	411	0	Tmito	L35mt|MRP-L35|Q9NZE8	ENSG00000132313
C7orf55	UPF0562 protein C7orf55 OS=Homo sapiens GN=C7orf55 PE=1 SV=2	1	4	43			1600000000	1800000000	1800000000	1600000000	0	1700000000	100	6.64386	8.60284e-05	4.06536	1700000000	1700000000	100	100	6.64386	6.64386	4	TRUE	FALSE	TRUE				Tmito	FMC1	ENSG00000164898
C7orf55	Isoform 2 of UPF0562 protein C7orf55 OS=Homo sapiens GN=C7orf55	3	6	30			12000000	18000000	22000000	14000000	0	16500000	100	6.64386	0.00502327	2.29901	18000000	15000000	100	100	6.64386	6.64386	4	TRUE	TRUE	TRUE	0	411	0	Tmito	FMC1	ENSG00000164898
GLRX5	Glutaredoxin-related protein 5, mitochondrial OS=Homo sapiens GN=GLRX5 PE=1 SV=2	1	1	4			6600000	4100000	7100000	4000000	0	5450000	100	6.64386	0.00682019	2.1662	5550000	5350000	100	100	6.64386	6.64386	4	TRUE	FALSE	FALSE	4	411	0.973236	Tmito	C14orf87|FLB4739|GRX5|PR01238|PRO1238|Q86SX6	ENSG00000182512
ACN9	Protein ACN9 homolog, mitochondrial OS=Homo sapiens GN=ACN9 PE=2 SV=1	6	6	62			280000000	250000000	300000000	300000000	0	282500000	100	6.64386	0.000160302	3.79506	300000000	265000000	100	100	6.64386	6.64386	4	TRUE	TRUE	TRUE	0	411	0	Tpossible_mito	Q9NRP4	ENSG00000196636
CHDH	Choline dehydrogenase, mitochondrial OS=Homo sapiens GN=CHDH PE=2 SV=2	1	1	1		4100000					2050000	0	0		0.5	0.30103	0	0	0	0			0	FALSE	FALSE	FALSE	0	411	0	Tmito	Q8NE62	ENSG00000016391
MRPL57	Ribosomal protein 63, mitochondrial OS=Homo sapiens GN=MRPL57 PE=1 SV=1	2	2	3		22000000	9100000	27000000			11000000	9025000	0.820455	-0.285505	0.892801	0.0492455	0	18050000	0	1.64091		0.714495	2	FALSE	FALSE	FALSE				Tmito	MRP63|bMRP63|Q9BQC6	ENSG00000173141
NDUFA4	NADH dehydrogenase [ubiquinone] 1 alpha subcomplex subunit 4 OS=Homo sapiens GN=NDUFA4 PE=1 SV=1	1	1	1					7800000		0	1950000	100	6.64386	0.391002	0.407821	3900000	0	100	0	6.64386		1	FALSE	FALSE	FALSE	7	411	1.70316	Tmito	CI-9k|CI-MLRQ|MLRQ|O00483	ENSG00000189043
HSD17B4	Peroxisomal multifunctional enzyme type 2 OS=Homo sapiens GN=HSD17B4 PE=1 SV=3	24	24	131	11000000	14000000	70000000	71000000	65000000	74000000	12500000	70000000	5.6	2.48543	4.07203e-05	4.39019	69500000	70500000	5.56	5.64	2.47508	2.4957	4	TRUE	TRUE	TRUE	68	411	16.545	Tpossible_mito	DBP|MFE-2|MPF-2|PRLTS1|SDR8C1|P51659	ENSG00000133835
OAT	Ornithine aminotransferase, mitochondrial OS=Homo sapiens GN=OAT PE=1 SV=1	16	16	92	62000000	53000000	27000000	33000000	36000000	44000000	57500000	35000000	0.608696	-0.716207	0.0460775	1.33651	40000000	30000000	0.695652	0.521739	-0.523562	-0.938599	4	TRUE	TRUE	TRUE	95	411	23.1144	Tmito	GACR|HOGA|OATASE|OKT|P04181	ENSG00000065154
MRPL50	39S ribosomal protein L50, mitochondrial OS=Homo sapiens GN=MRPL50 PE=1 SV=2	7	7	57	47000000	33000000	63000000	54000000	73000000	68000000	40000000	64500000	1.6125	0.689299	0.112655	0.948249	70500000	58500000	1.7625	1.4625	0.817623	0.548437	4	FALSE	TRUE	TRUE	2	411	0.486618	Tmito	MRP-L50|Q8N5N7	ENSG00000136897
CHCHD7	Isoform 4 of Coiled-coil-helix-coiled-coil-helix domain-containing protein 7 OS=Homo sapiens GN=CHCHD7	1	1	1					6300000		0	1575000	100	6.64386	0.391002	0.407821	3150000	0	100	0	6.64386		1	FALSE	FALSE	FALSE	0	411	0	Tpossible_mito	COX23|Q9BUK0	ENSG00000170791
SHMT2	Serine hydroxymethyltransferase, mitochondrial OS=Homo sapiens GN=SHMT2 PE=1 SV=3	1	1	4			5800000		5200000		0	2750000	100	6.64386	0.182636	0.738414	2600000	2900000	100	100	6.64386	6.64386	2	FALSE	FALSE	FALSE	101	411	24.5742	Tmito	GLYA|HEL-S-51e|SHMT|P34897	ENSG00000182199
MTHFD2	Bifunctional methylenetetrahydrofolate dehydrogenase/cyclohydrolase, mitochondrial OS=Homo sapiens GN=MTHFD2 PE=1 SV=2	5	5	25	24000000	23000000	20000000	23000000	27000000	26000000	23500000	24000000	1.02128	0.0303736	0.779962	0.107927	26500000	21500000	1.12766	0.914894	0.173332	-0.128324	4	FALSE	TRUE	TRUE	29	411	7.05596	Tmito	NMDMC|P13995	ENSG00000065911
MRPL14	39S ribosomal protein L14, mitochondrial OS=Homo sapiens GN=MRPL14 PE=1 SV=1	6	6	49	5500000	5900000	100000000	110000000	100000000	130000000	5700000	110000000	19.2982	4.2704	0.000670986	3.17329	115000000	105000000	20.1754	18.4211	4.33453	4.20328	4	TRUE	TRUE	TRUE	17	411	4.13625	Tmito	L14mt|L32mt|MRP-L14|MRP-L32|MRPL32|RMPL32|RPML32|Q6P1L8	ENSG00000180992
TRMT2B	tRNA (uracil(54)-C(5))-methyltransferase homolog OS=Homo sapiens GN=TRMT2B PE=2 SV=1	12	12	76			52000000	48000000	41000000	49000000	0	47500000	100	6.64386	0.000257186	3.58975	45000000	50000000	100	100	6.64386	6.64386	4	TRUE	TRUE	TRUE	0	411	0	Tmito	CXorf34|dJ341D10.3|Q96GJ1	ENSG00000188917
MRPS24	28S ribosomal protein S24, mitochondrial OS=Homo sapiens GN=MRPS24 PE=1 SV=1	1	1	1				4000000			0	1000000	100	6.64386	0.391002	0.407821	0	2000000	0	100		6.64386	1	FALSE	FALSE	FALSE	2	411	0.486618	Tmito	MRP-S24|S24mt|bMRP-47|bMRP47|Q96EL2	ENSG00000062582
GSR	Glutathione reductase, mitochondrial OS=Homo sapiens GN=GSR PE=1 SV=2	11	11	41			31000000	41000000	43000000	31000000	0	36500000	100	6.64386	0.00144803	2.83922	37000000	36000000	100	100	6.64386	6.64386	4	TRUE	TRUE	TRUE	13	411	3.16302	Tmito	HEL-75|P00390	ENSG00000104687
TEFM	Transcription elongation factor, mitochondrial OS=Homo sapiens GN=TEFM PE=1 SV=1	1	1	1						2800000	0	700000	100	6.64386	0.391002	0.407821	1400000	0	100	0	6.64386		1	FALSE	FALSE	FALSE	0	411	0	Tmito	C17orf42|Q96QE5	ENSG00000172171
MRPS22	28S ribosomal protein S22, mitochondrial OS=Homo sapiens GN=MRPS22 PE=1 SV=1	3	3	8	3600000		3300000	6100000	4200000	6400000	1800000	5000000	2.77778	1.47393	0.29612	0.528532	5300000	4700000	2.94444	2.61111	1.558	1.38466	4	FALSE	TRUE	TRUE	32	411	7.78589	Tmito	C3orf5|COXPD5|GIBT|MRP-S22|RPMS22|P82650	ENSG00000175110
GLUD1	Glutamate dehydrogenase 1, mitochondrial OS=Homo sapiens GN=GLUD1 PE=1 SV=2	1	1	6	8700000	8500000	9200000	8100000	13000000	13000000	8600000	10825000	1.25872	0.331958	0.179335	0.746334	13000000	8650000	1.51163	1.00581	0.596103	0.00836347	4	FALSE	FALSE	TRUE	90	411	21.8978	Tmito	GDH|GDH1|GLUD|P00367	ENSG00000148672
NUBPL	Iron-sulfur protein NUBPL OS=Homo sapiens GN=NUBPL PE=1 SV=3	1	1	2					3700000	4600000	0	2075000	100	6.64386	0.185411	0.731865	4150000	0	100	0	6.64386		2	FALSE	FALSE	FALSE	2	411	0.486618	Tmito	C14orf127|IND1|huInd1|Q8TB37	ENSG00000151413
LYRM2	LYR motif-containing protein 2 OS=Homo sapiens GN=LYRM2 PE=1 SV=1	4	4	80			340000000	240000000	230000000	230000000	0	260000000	100	6.64386	0.00231843	2.63481	230000000	290000000	100	100	6.64386	6.64386	4	TRUE	TRUE	TRUE	0	411	0	Tmito	DJ122O8.2|Q9NU23	ENSG00000083099
GADD45GIP1	Growth arrest and DNA damage-inducible proteins-interacting protein 1 OS=Homo sapiens GN=GADD45GIP1 PE=1 SV=1	3	3	13	8100000		13000000	12000000	11000000	15000000	4050000	12750000	3.14815	1.6545	0.266127	0.574911	13000000	12500000	3.20988	3.08642	1.68252	1.62593	4	FALSE	TRUE	TRUE	22	411	5.3528	Tmito	CKBBP2|CKbetaBP2|CRIF1|MRP-L59|PLINP|PLINP-1|PRG6|Plinp1|Q8TAE8	ENSG00000179271
TFAM	Transcription factor A, mitochondrial OS=Homo sapiens GN=TFAM PE=1 SV=1	8	8	42	9900000	9100000	61000000	56000000	72000000	81000000	9500000	67500000	7.10526	2.82889	0.00185636	2.73134	76500000	58500000	8.05263	6.15789	3.00946	2.62244	4	TRUE	TRUE	TRUE	21	411	5.10949	Tmito	MTTF1|MTTFA|TCF6|TCF6L1|TCF6L2|TCF6L3|Q00059	ENSG00000108064
ALDH18A1	Delta-1-pyrroline-5-carboxylate synthase OS=Homo sapiens GN=ALDH18A1 PE=1 SV=2	4	4	12	8400000		11000000	7900000	12000000	8100000	4200000	9750000	2.32143	1.21501	0.403398	0.394267	10050000	9450000	2.39286	2.25	1.25873	1.16993	4	FALSE	TRUE	TRUE	93	411	22.6277	Tmito	ARCL3A|GSAS|P5CS|PYCS|P54886	ENSG00000059573
OXSM	3-oxoacyl-[acyl-carrier-protein] synthase, mitochondrial OS=Homo sapiens GN=OXSM PE=1 SV=1	13	13	109			120000000	110000000	110000000	110000000	0	112500000	100	6.64386	2.4158e-05	4.61694	110000000	115000000	100	100	6.64386	6.64386	4	TRUE	TRUE	TRUE	0	411	0	Tmito	FASN2D|KASI|KS|Q9NWU1	ENSG00000151093
TARS2	Threonine--tRNA ligase, mitochondrial OS=Homo sapiens GN=TARS2 PE=1 SV=1	1	1	1			4200000				0	1050000	100	6.64386	0.391002	0.407821	0	2100000	0	100		6.64386	1	FALSE	FALSE	FALSE	23	411	5.59611	Tmito	TARSL1|thrRS|Q9BW92	ENSG00000143374
TBRG4	Protein TBRG4 OS=Homo sapiens GN=TBRG4 PE=1 SV=1	3	3	11	4400000	3600000	10000000	7400000	6100000	11000000	4000000	8625000	2.15625	1.10852	0.0219841	1.65789	8550000	8700000	2.1375	2.175	1.09592	1.12102	4	TRUE	TRUE	TRUE	9	411	2.18978	Tmito	CPR2|FASTKD4|Q969Z0	ENSG00000136270
C2orf47	Uncharacterized protein C2orf47, mitochondrial OS=Homo sapiens GN=C2orf47 PE=1 SV=1	1	1	1						3900000	0	975000	100	6.64386	0.391002	0.407821	1950000	0	100	0	6.64386		1	FALSE	FALSE	FALSE	12	411	2.91971	Tmito	Q8WWC4	ENSG00000162972
CISD3	CDGSH iron-sulfur domain-containing protein 3, mitochondrial OS=Homo sapiens GN=CISD3 PE=1 SV=1	1	1	2	10000000						5000000	0	0		0.5	0.30103	0	0	0	0			0	FALSE	FALSE	FALSE	4	411	0.973236	Tmito	Miner2|P0C7P0	ENSG00000230055
GRPEL2	GrpE protein homolog 2, mitochondrial OS=Homo sapiens GN=GRPEL2 PE=1 SV=1	7	7	24			18000000	19000000	18000000	24000000	0	19750000	100	6.64386	0.00083206	3.07985	21000000	18500000	100	100	6.64386	6.64386	4	TRUE	TRUE	TRUE	4	411	0.973236	Tmito	Mt-GrpE#2|Q8TAA5	ENSG00000164284
ALDH7A1	Alpha-aminoadipic semialdehyde dehydrogenase OS=Homo sapiens GN=ALDH7A1 PE=1 SV=5	5	5	9			7200000	6200000	10000000		0	5850000	100	6.64386	0.0693699	1.15883	5000000	6700000	100	100	6.64386	6.64386	3	FALSE	TRUE	TRUE	37	411	9.00243	Tmito	ATQ1|EPD|PDE|P49419	ENSG00000164904
MRPL39	Isoform 2 of 39S ribosomal protein L39, mitochondrial OS=Homo sapiens GN=MRPL39	5	5	24		5200000	19000000	24000000	26000000	27000000	2600000	24000000	9.23077	3.20645	0.020743	1.68313	26500000	21500000	10.1923	8.26923	3.34941	3.04775	4	TRUE	TRUE	TRUE	25	411	6.08273	Tmito	C21orf92|L39mt|MRP-L5|MRPL5|PRED22|PRED66|RPML5|Q9NYK5	ENSG00000154719
FUNDC2	FUN14 domain-containing protein 2 OS=Homo sapiens GN=FUNDC2 PE=1 SV=2	1	1	4			8000000	8300000	8900000	9400000	0	8650000	100	6.64386	0.000103251	3.9861	9150000	8150000	100	100	6.64386	6.64386	4	TRUE	FALSE	FALSE	0	411	0	Tpossible_mito	DC44|HCBP6|HCC3|PD03104|Q9BWH2	ENSG00000165775
MMAB	Cob(I)yrinic acid a,c-diamide adenosyltransferase, mitochondrial OS=Homo sapiens GN=MMAB PE=1 SV=1	2	2	4			10000000		8500000	7700000	0	6550000	100	6.64386	0.0609534	1.215	8100000	5000000	100	100	6.64386	6.64386	3	FALSE	FALSE	FALSE	0	411	0	Tmito	ATR|cblB|cob|Q96EY8	ENSG00000139428
PPOX	Protoporphyrinogen oxidase OS=Homo sapiens GN=PPOX PE=1 SV=1	2	2	2		2300000				4500000	1150000	1125000	0.978261	-0.0317089	0.988598	0.00498048	2250000	0	1.95652	0	0.968291		1	FALSE	FALSE	FALSE	6	411	1.45985	Tmito	PPO|V290M|VP|P50336	ENSG00000143224
MRPL45	39S ribosomal protein L45, mitochondrial OS=Homo sapiens GN=MRPL45 PE=1 SV=2	3	3	10			16000000	15000000	23000000	25000000	0	19750000	100	6.64386	0.0042072	2.37601	24000000	15500000	100	100	6.64386	6.64386	4	TRUE	TRUE	TRUE	14	411	3.40633	Tmito	L45mt|MRP-L45|B4DEF8	ENSG00000174100
CPOX	Oxygen-dependent coproporphyrinogen-III oxidase, mitochondrial OS=Homo sapiens GN=CPOX PE=1 SV=3	4	4	14	4200000		12000000	11000000	10000000	6300000	2100000	9825000	4.67857	2.22607	0.102777	0.988104	8150000	11500000	3.88095	5.47619	1.95641	2.45317	4	FALSE	TRUE	TRUE	6	411	1.45985	Tmito	CPO|CPX|HCP|P36551	ENSG00000080819
C17orf89	Uncharacterized protein C17orf89 OS=Homo sapiens GN=C17orf89 PE=2 SV=1	1	1	7			85000000	85000000	75000000	75000000	0	80000000	100	6.64386	0.000103133	3.9866	75000000	85000000	100	100	6.64386	6.64386	4	TRUE	FALSE	TRUE				Tpossible_mito	A1L188	ENSG00000224877
DCAKD	Dephospho-CoA kinase domain-containing protein OS=Homo sapiens GN=DCAKD PE=1 SV=1	1	1	4			10000000	10000000	9500000	10000000	0	9875000	100	6.64386	4.47032e-06	5.34966	9750000	10000000	100	100	6.64386	6.64386	4	TRUE	FALSE	FALSE	2	411	0.486618	Tmito	Q8WVC6	ENSG00000172992
SLC16A1	Monocarboxylate transporter 1 OS=Homo sapiens GN=SLC16A1 PE=1 SV=3	2	2	4			11000000		4400000	7900000	0	5825000	100	6.64386	0.0905204	1.04325	6150000	5500000	100	100	6.64386	6.64386	3	FALSE	FALSE	FALSE	47	411	11.4355	Tpossible_mito	HHF7|MCT|MCT1|P53985	ENSG00000155380
DIABLO	Diablo homolog, mitochondrial OS=Homo sapiens GN=DIABLO PE=1 SV=1	7	7	27	39000000	24000000	470000000	10000000	630000000	18000000	31500000	282000000	8.95238	3.16227	0.211356	0.674986	324000000	240000000	10.2857	7.61905	3.36257	2.92961	4	FALSE	TRUE	TRUE	49	411	11.9221	Tmito	DFNA64|SMAC|Q9NR28	ENSG00000184047
SDR39U1	Isoform 2 of Epimerase family protein SDR39U1 OS=Homo sapiens GN=SDR39U1	2	2	8		3700000	9200000	6900000	6500000	8100000	1850000	7675000	4.14865	2.05264	0.167144	0.77691	7300000	8050000	3.94595	4.35135	1.98037	2.12146	4	FALSE	FALSE	TRUE	1	411	0.243309	Tnon_mito	C14orf124|HCDI|Q9NRG7	ENSG00000100445
SLC25A14	Isoform 3 of Brain mitochondrial carrier protein 1 OS=Homo sapiens GN=SLC25A14	1	1	4			340000000	270000000	340000000	360000000	0	327500000	100	6.64386	0.000476527	3.32191	350000000	305000000	100	100	6.64386	6.64386	4	TRUE	FALSE	FALSE	1	411	0.243309	Tmito	BMCP1|UCP5|O95258	ENSG00000102078
HADHB	Trifunctional enzyme subunit beta, mitochondrial OS=Homo sapiens GN=HADHB PE=1 SV=3	19	19	123	39000000	33000000	85000000	72000000	88000000	85000000	36000000	82500000	2.29167	1.1964	0.00108324	2.96527	86500000	78500000	2.40278	2.18056	1.2647	1.1247	4	TRUE	TRUE	TRUE	47	411	11.4355	Tmito	ECHB|MTPB|TP-BETA|P55084	ENSG00000138029
AARS2	Alanine--tRNA ligase, mitochondrial OS=Homo sapiens GN=AARS2 PE=1 SV=1	20	20	78			32000000	27000000	31000000	27000000	0	29250000	100	6.64386	0.000198929	3.7013	29000000	29500000	100	100	6.64386	6.64386	4	TRUE	TRUE	TRUE	12	411	2.91971	Tmito	AARSL|COXPD8|MT-ALARS|MTALARS|Q5JTZ9	ENSG00000124608
CHCHD2	Coiled-coil-helix-coiled-coil-helix domain-containing protein 2, mitochondrial OS=Homo sapiens GN=CHCHD2 PE=1 SV=1	3	3	29	31000000	41000000	47000000	39000000	57000000	50000000	36000000	48250000	1.34028	0.422532	0.177045	0.751915	53500000	43000000	1.48611	1.19444	0.571542	0.25634	4	FALSE	TRUE	TRUE	35	411	8.51582	Tmito	C7orf17|Q9Y6H1	ENSG00000106153
ELAC2	Zinc phosphodiesterase ELAC protein 2 OS=Homo sapiens GN=ELAC2 PE=1 SV=2	2	2	3			8200000		6800000	4400000	0	4850000	100	6.64386	0.073851	1.13164	5600000	4100000	100	100	6.64386	6.64386	3	FALSE	FALSE	FALSE	16	411	3.89294	Tmito	COXPD17|ELC2|HPC2|Q9BQ52	ENSG00000006744
NUDT8	Nucleoside diphosphate-linked moiety X motif 8, mitochondrial OS=Homo sapiens GN=NUDT8 PE=2 SV=2	1	1	1						8000000	0	2000000	100	6.64386	0.391002	0.407821	4000000	0	100	0	6.64386		1	FALSE	FALSE	FALSE	0	411	0	Tmito	Q8WV74	ENSG00000167799
ACLY	ATP-citrate synthase OS=Homo sapiens GN=ACLY PE=1 SV=3	3	3	3				3900000	6600000	5800000	0	4075000	100	6.64386	0.0696218	1.15725	6200000	1950000	100	100	6.64386	6.64386	3	FALSE	TRUE	FALSE	118	411	28.7105	Tmito	ACL|ATPCL|CLATP|P53396	ENSG00000131473
CKMT1A	Isoform 2 of Creatine kinase U-type, mitochondrial OS=Homo sapiens GN=CKMT1A	2	2	4		13000000		18000000	6500000	17000000	6500000	10375000	1.59615	0.6746	0.669891	0.173996	11750000	9000000	1.80769	1.38462	0.854149	0.469485	3	FALSE	FALSE	FALSE	19	411	4.62287	Tmito	CKMT1	ENSG00000223572
FAM136A	Protein FAM136A OS=Homo sapiens GN=FAM136A PE=2 SV=1	2	2	9	9500000	7600000	7500000	7400000	9000000	7900000	8550000	7950000	0.929825	-0.10497	0.640988	0.19315	8450000	7450000	0.988304	0.871345	-0.0169731	-0.198684	4	FALSE	FALSE	TRUE	5	411	1.21655	Tmito	Q96C01	ENSG00000035141
NDUFAF2	Mimitin, mitochondrial OS=Homo sapiens GN=NDUFAF2 PE=1 SV=1	2	2	8	4200000	4600000		12000000	15000000	18000000	4400000	11250000	2.55682	1.35435	0.180833	0.742723	16500000	6000000	3.75	1.36364	1.90689	0.447459	3	FALSE	FALSE	TRUE	2	411	0.486618	Tmito	B17.2L|MMTN|NDUFA12L|mimitin|Q8N183	ENSG00000164182
MRPL42	39S ribosomal protein L42, mitochondrial OS=Homo sapiens GN=MRPL42 PE=4 SV=1	2	2	4				5200000		11000000	0	4050000	100	6.64386	0.219995	0.657587	5500000	2600000	100	100	6.64386	6.64386	2	FALSE	FALSE	FALSE	0	411	0	Tmito	L31MT|L42MT|MRP-L31|MRP-L42|MRP-S32|MRPL31|MRPS32|PTD007|RPML31|S32MT|Q9Y6G3	ENSG00000198015
ALDH3A2	Isoform 2 of Fatty aldehyde dehydrogenase OS=Homo sapiens GN=ALDH3A2	9	9	45	16000000	13000000	27000000	23000000	27000000	25000000	14500000	25500000	1.75862	0.814444	0.029295	1.53321	26000000	25000000	1.7931	1.72414	0.842459	0.785875	4	TRUE	TRUE	TRUE	29	411	7.05596	Tpossible_mito	ALDH10|FALDH|SLS|P51648	ENSG00000072210
ACSL6	Isoform 1 of Long-chain-fatty-acid--CoA ligase 6 OS=Homo sapiens GN=ACSL6	1	1	1					230000000		0	57500000	100	6.64386	0.391002	0.407821	115000000	0	100	0	6.64386		1	FALSE	FALSE	FALSE	0	411	0	Tpossible_mito	ACS2|FACL6|LACS 6|LACS2|LACS5|Q9UKU0	ENSG00000164398
CYB5B	Cytochrome b5 type B OS=Homo sapiens GN=CYB5B PE=3 SV=1	3	3	11	8000000	9600000	12000000	19000000	24000000	11000000	8800000	16500000	1.875	0.906891	0.0839741	1.07585	17500000	15500000	1.98864	1.76136	0.991779	0.816693	4	FALSE	TRUE	TRUE	8	411	1.94647	Tmito	CYB5-M|CYPB5M|OMB5|RP11-140H17.1|O43169	ENSG00000103018
MRPS18B	28S ribosomal protein S18b, mitochondrial OS=Homo sapiens GN=MRPS18B PE=1 SV=1	2	2	5	9400000	6800000		8700000		11000000	8100000	4925000	0.608025	-0.717798	0.373924	0.427217	5500000	4350000	0.679012	0.537037	-0.55849	-0.896907	2	FALSE	FALSE	TRUE	27	411	6.56934	Tmito	C6orf14|HSPC183|HumanS18a|MRP-S18-2|MRPS18-2|PTD017|S18amt|Q9Y676	ENSG00000203624
CAT	Catalase OS=Homo sapiens GN=CAT PE=1 SV=3	1	1	1	4400000						2200000	0	0		0.5	0.30103	0	0	0	0			0	FALSE	FALSE	FALSE	37	411	9.00243	Tpossible_mito	P04040	ENSG00000121691
HTATIP2	Isoform 3 of Oxidoreductase HTATIP2 OS=Homo sapiens GN=HTATIP2	1	1	4		3600000	8400000		5800000	4400000	1800000	4650000	2.58333	1.36923	0.341437	0.46669	5100000	4200000	2.83333	2.33333	1.5025	1.22239	3	FALSE	FALSE	FALSE	1	411	0.243309	Tnon_mito	CC3|SDR44U1|TIP30|Q9BUP3	ENSG00000109854
AKR7A2	Aflatoxin B1 aldehyde reductase member 2 OS=Homo sapiens GN=AKR7A2 PE=1 SV=3	1	1	4		2500000		3400000	3500000	3400000	1250000	2575000	2.06	1.04264	0.473747	0.324453	3450000	1700000	2.76	1.36	1.46467	0.443607	3	FALSE	FALSE	FALSE	10	411	2.43309	Tmito	AFAR|AFAR1|AFB1-AR1|AKR7|O43488	ENSG00000053371
NME4	Nucleoside diphosphate kinase OS=Homo sapiens GN=NME4 PE=2 SV=1	7	7	27	26000000	24000000	13000000	13000000	8900000		25000000	8725000	0.349	-1.5187	0.0098567	2.00627	4450000	13000000	0.178	0.52	-2.49005	-0.943416	3	TRUE	TRUE	TRUE	12	411	2.91971	Tmito	NDPK-D|NM23H4|nm23-H4|O00746	ENSG00000103202
PRDX6	Peroxiredoxin-6 OS=Homo sapiens GN=PRDX6 PE=1 SV=3	7	7	21	19000000	22000000	6100000	6600000	7100000	6000000	20500000	6450000	0.314634	-1.66825	0.061126	1.21377	6550000	6350000	0.319512	0.309756	-1.64606	-1.6908	4	FALSE	TRUE	TRUE	158	411	38.4428	Tpossible_mito	1-Cys|AOP2|HEL-S-128m|NSGPx|PRX|aiPLA2|p29|P30041	ENSG00000117592
NIPSNAP1	Protein NipSnap homolog 1 OS=Homo sapiens GN=NIPSNAP1 PE=1 SV=1	5	5	36	21000000	25000000	21000000	22000000	23000000	28000000	23000000	23500000	1.02174	0.0310269	0.85966	0.0656731	25500000	21500000	1.1087	0.934783	0.148863	-0.0972972	4	FALSE	TRUE	TRUE	14	411	3.40633	Tmito	Q9BPW8	ENSG00000184117
MRPL52	39S ribosomal protein L52, mitochondrial OS=Homo sapiens GN=MRPL52 PE=2 SV=2	1	1	2			6900000		9300000		0	4050000	100	6.64386	0.1886	0.724458	4650000	3450000	100	100	6.64386	6.64386	2	FALSE	FALSE	FALSE	0	411	0	Tmito	Q86TS9	ENSG00000172590
GOT2	Aspartate aminotransferase, mitochondrial OS=Homo sapiens GN=GOT2 PE=1 SV=3	1	1	1		7200000					3600000	0	0		0.5	0.30103	0	0	0	0			0	FALSE	FALSE	FALSE	24	411	5.83942	Tmito	KAT4|KATIV|mitAAT|P00505	ENSG00000125166
PTRH2	Peptidyl-tRNA hydrolase 2, mitochondrial OS=Homo sapiens GN=PTRH2 PE=2 SV=1	2	2	2					14000000	9300000	0	5825000	100	6.64386	0.194382	0.711344	11650000	0	100	0	6.64386		2	FALSE	FALSE	FALSE	8	411	1.94647	Tmito	BIT1|PTH2|Q9Y3E5	ENSG00000141378
MTPAP	Isoform 2 of Poly(A) RNA polymerase, mitochondrial OS=Homo sapiens GN=MTPAP	3	3	8			5000000	8800000	8700000	5300000	0	6950000	100	6.64386	0.00685702	2.16386	7000000	6900000	100	100	6.64386	6.64386	4	TRUE	TRUE	TRUE	12	411	2.91971	Tmito	PAPD1|SPAX4|Q9NVV4	ENSG00000107951
CISD2	CDGSH iron-sulfur domain-containing protein 2 OS=Homo sapiens GN=CISD2 PE=2 SV=1	1	1	2				7200000		9100000	0	4075000	100	6.64386	0.185986	0.73052	4550000	3600000	100	100	6.64386	6.64386	2	FALSE	FALSE	FALSE	0	411	0	Tmito	ERIS|Miner1|NAF-1|WFS2|ZCD2|Q8N5K1	ENSG00000145354
ACSL1	Long-chain-fatty-acid--CoA ligase 1 OS=Homo sapiens GN=ACSL1 PE=1 SV=1	27	27	164	9300000	6000000	120000000	110000000	110000000	110000000	7650000	112500000	14.7059	3.87832	4.61249e-06	5.33606	110000000	115000000	14.3791	15.0327	3.8459	3.91003	4	TRUE	TRUE	TRUE	2	411	0.486618	Tpossible_mito	ACS1|FACL1|FACL2|LACS|LACS1|LACS2|P33121	ENSG00000151726
HSDL1	Inactive hydroxysteroid dehydrogenase-like protein 1 OS=Homo sapiens GN=HSDL1 PE=1 SV=3	3	3	10	3200000	5100000	9700000	9000000	10000000	10000000	4150000	9675000	2.33133	1.22115	0.0922161	1.03519	10000000	9350000	2.40964	2.25301	1.26882	1.17186	4	FALSE	TRUE	TRUE	2	411	0.486618	Tmito	SDR12C3|Q3SXM5	ENSG00000103160
HEBP1	Heme-binding protein 1 OS=Homo sapiens GN=HEBP1 PE=1 SV=1	2	2	4	6200000	6600000		5800000			6400000	1450000	0.226562	-2.14202	0.0407265	1.39012	0	2900000	0	0.453125		-1.14202	1	TRUE	FALSE	FALSE	3	411	0.729927	Tmito	HBP|HEBP|Q9NRV9	ENSG00000013583
PTPMT1	Phosphatidylglycerophosphatase and protein-tyrosine phosphatase 1 OS=Homo sapiens GN=PTPMT1 PE=1 SV=1	2	2	7			2800000	3400000	3100000	4000000	0	3325000	100	6.64386	0.000987407	3.0055	3550000	3100000	100	100	6.64386	6.64386	4	TRUE	FALSE	TRUE	9	411	2.18978	Tmito	DUSP23|MOSP|PLIP|Q8WUK0	ENSG00000110536
KARS	Lysine--tRNA ligase OS=Homo sapiens GN=KARS PE=1 SV=3	6	6	21	6900000	6700000	13000000	6900000	15000000	14000000	6800000	12225000	1.79779	0.846228	0.0584336	1.23334	14500000	9950000	2.13235	1.46324	1.09245	0.549162	4	FALSE	TRUE	TRUE	70	411	17.0316	Tmito	CMTRIB|DFNB89|KARS1|KARS2|KRS|Q15046	ENSG00000065427
DNAJC19	Mitochondrial import inner membrane translocase subunit TIM14 OS=Homo sapiens GN=DNAJC19 PE=1 SV=3	1	1	2					2200000		0	550000	100	6.64386	0.391002	0.407821	1100000	0	100	0	6.64386		1	FALSE	FALSE	FALSE	7	411	1.70316	Tmito	PAM18|TIM14|TIMM14|Q96DA6	ENSG00000205981
FASN	Fatty acid synthase OS=Homo sapiens GN=FASN PE=1 SV=3	21	21	50	5100000	3400000	13000000	12000000	13000000	14000000	4250000	13000000	3.05882	1.61298	0.0269963	1.5687	13500000	12500000	3.17647	2.94118	1.66742	1.55639	4	TRUE	TRUE	TRUE	167	411	40.6326	Tpossible_mito	FAS|OA-519|SDR27X1|P49327	ENSG00000169710
ATXN2	Ataxin-2 OS=Homo sapiens GN=ATXN2 PE=1 SV=2	2	2	8	3700000	2600000		3600000	5300000	5900000	3150000	3700000	1.1746	0.232173	0.722165	0.141364	5600000	1800000	1.77778	0.571429	0.830075	-0.807355	3	FALSE	FALSE	TRUE	33	411	8.0292	Tnon_mito	ASL13|ATX2|SCA2|TNRC13|Q99700	ENSG00000204842
TRMT10C	Mitochondrial ribonuclease P protein 1 OS=Homo sapiens GN=TRMT10C PE=1 SV=2	1	1	4			12000000	11000000	14000000	14000000	0	12750000	100	6.64386	0.000443344	3.35326	14000000	11500000	100	100	6.64386	6.64386	4	TRUE	FALSE	FALSE	21	411	5.10949	Tmito	HNYA|MRPP1|RG9MTD1|Q7L0Y3	ENSG00000174173
ACOT7	Cytosolic acyl coenzyme A thioester hydrolase OS=Homo sapiens GN=ACOT7 PE=1 SV=3	2	2	2						6400000	0	1600000	100	6.64386	0.391002	0.407821	3200000	0	100	0	6.64386		1	FALSE	FALSE	FALSE	29	411	7.05596	Tpossible_mito	ACH1|ACT|BACH|CTE-II|LACH|LACH1|RP1-120G22.10|hBACH|O00154	ENSG00000097021
PYCR2	Pyrroline-5-carboxylate reductase 2 OS=Homo sapiens GN=PYCR2 PE=1 SV=1	1	2	5					20000000		0	5000000	100	6.64386	0.391002	0.407821	10000000	0	100	0	6.64386		1	FALSE	FALSE	TRUE	32	411	7.78589	Tmito	P5CR2|Q96C36	ENSG00000143811
RPS18	40S ribosomal protein S18 OS=Homo sapiens GN=RPS18 PE=1 SV=3	8	8	117	320000000	290000000	190000000	170000000	240000000	250000000	305000000	212500000	0.696721	-0.521346	0.0224801	1.6482	245000000	180000000	0.803279	0.590164	-0.316027	-0.760812	4	TRUE	TRUE	TRUE	229	411	55.7178	Tnon_mito	D6S218E|HKE3|KE-3|KE3|S18|P62269	ENSG00000096150
RDH11	Retinol dehydrogenase 11 OS=Homo sapiens GN=RDH11 PE=1 SV=2	7	7	28	15000000	13000000	25000000	31000000	25000000	26000000	14000000	26750000	1.91071	0.934112	0.00212258	2.67314	25500000	28000000	1.82143	2	0.86507	1	4	TRUE	TRUE	TRUE	9	411	2.18978	Tnon_mito	ARSDR1|CGI82|HCBP12|MDT1|PSDR1|RALR1|SCALD|SDR7C1|Q8TC12	ENSG00000072042
LYRM1	LYR motif-containing protein 1 OS=Homo sapiens GN=LYRM1 PE=2 SV=1	2	2	7			20000000	18000000	24000000	21000000	0	20750000	100	6.64386	0.000475885	3.3225	22500000	19000000	100	100	6.64386	6.64386	4	TRUE	FALSE	TRUE	0	411	0	Tmito	A211C6.1|O43325	ENSG00000102897
GTPBP10	GTP-binding protein 10 OS=Homo sapiens GN=GTPBP10 PE=1 SV=1	5	5	18			11000000	7800000	11000000	10000000	0	9950000	100	6.64386	0.000941769	3.02606	10500000	9400000	100	100	6.64386	6.64386	4	TRUE	TRUE	TRUE	5	411	1.21655	Tmito	ObgH2|A4D1E9	ENSG00000105793
PSMA6	Proteasome subunit alpha type OS=Homo sapiens GN=PSMA6 PE=3 SV=1	4	4	18	9600000	10000000	17000000	14000000	17000000	15000000	9800000	15750000	1.60714	0.684498	0.00296122	2.52853	16000000	15500000	1.63265	1.58163	0.707218	0.661415	4	TRUE	TRUE	TRUE	86	411	20.9246	Tpossible_mito	IOTA|PROS27|p27K|P60900	ENSG00000100902
MTHFD1	C-1-tetrahydrofolate synthase, cytoplasmic OS=Homo sapiens GN=MTHFD1 PE=2 SV=1	1	1	1						6400000	0	1600000	100	6.64386	0.391002	0.407821	3200000	0	100	0	6.64386		1	FALSE	FALSE	FALSE	110	411	26.764	Tmito	MTHFC|MTHFD|P11586	ENSG00000100714
NDUFAF3	NADH dehydrogenase [ubiquinone] 1 alpha subcomplex assembly factor 3 OS=Homo sapiens GN=NDUFAF3 PE=1 SV=1	3	3	4	9300000	7100000					8200000	0	0		0.0848934	1.07113	0	0	0	0			0	FALSE	TRUE	FALSE	2	411	0.486618	Tmito	2P1|C3orf60|E3-3|Q9BU61	ENSG00000178057
NCEH1	Arylacetamide deacetylase-like 1 OS=Homo sapiens GN=NCEH1 PE=4 SV=1	1	1	1					2700000		0	675000	100	6.64386	0.391002	0.407821	1350000	0	100	0	6.64386		1	FALSE	FALSE	FALSE	1	411	0.243309	Tnon_mito	AADACL1|NCEH|Q6PIU2	ENSG00000144959
TPI1	Triosephosphate isomerase OS=Homo sapiens GN=TPI1 PE=1 SV=3	4	4	21	8400000	8400000	10000000	9500000	8600000	9000000	8400000	9275000	1.10417	0.142958	0.0635172	1.19711	8800000	9750000	1.04762	1.16071	0.0671142	0.215013	4	FALSE	TRUE	TRUE	90	411	21.8978	Tnon_mito	HEL-S-49|TIM|TPI|TPID|P60174	ENSG00000111669
FASTKD2	FAST kinase domain-containing protein 2 OS=Homo sapiens GN=FASTKD2 PE=1 SV=1	1	1	2			4500000			5900000	0	2600000	100	6.64386	0.187406	0.727216	2950000	2250000	100	100	6.64386	6.64386	2	FALSE	FALSE	FALSE	10	411	2.43309	Tmito	KIAA0971|Q9NYY8	ENSG00000118246
CYB5A	Cytochrome b5 OS=Homo sapiens GN=CYB5A PE=1 SV=2	1	1	6	9000000	9000000	18000000	15000000	18000000	18000000	9000000	17250000	1.91667	0.938599	0.00160887	2.79348	18000000	16500000	2	1.83333	1	0.874469	4	TRUE	FALSE	TRUE	3	411	0.729927	Tpossible_mito	CYB5|MCB5|P00167	ENSG00000166347
GAPDH	Glyceraldehyde-3-phosphate dehydrogenase OS=Homo sapiens GN=GAPDH PE=1 SV=3	7	7	38	27000000	31000000	29000000	28000000	36000000	31000000	29000000	31000000	1.06897	0.0962153	0.515599	0.287688	33500000	28500000	1.15517	0.982759	0.208108	-0.025091	4	FALSE	TRUE	TRUE	248	411	60.3406	Tpossible_mito	G3PD|GAPD|HEL-S-162eP|P04406	ENSG00000111640
PI4KA	Phosphatidylinositol 4-kinase alpha OS=Homo sapiens GN=PI4KA PE=2 SV=1	31	31	111			31000000	29000000	47000000	48000000	0	38750000	100	6.64386	0.00465728	2.33187	47500000	30000000	100	100	6.64386	6.64386	4	TRUE	TRUE	TRUE	14	411	3.40633	Tnon_mito	PI4K-ALPHA|PIK4CA|pi4K230|P42356	ENSG00000241973
SCP2	Non-specific lipid-transfer protein OS=Homo sapiens GN=SCP2 PE=1 SV=2	1	1	2				4200000		3500000	0	1925000	100	6.64386	0.18431	0.734451	1750000	2100000	100	100	6.64386	6.64386	2	FALSE	FALSE	FALSE	7	411	1.70316	Tpossible_mito	NLTP|NSL-TP|SCP-2|SCP-CHI|SCP-X|SCPX|P22307	ENSG00000116171
ACOX1	Peroxisomal acyl-coenzyme A oxidase 1 OS=Homo sapiens GN=ACOX1 PE=1 SV=3	2	2	11	3700000	4200000	4200000	5400000	6100000	6600000	3950000	5575000	1.41139	0.497119	0.0491963	1.30807	6350000	4800000	1.60759	1.21519	0.684904	0.281182	4	TRUE	FALSE	TRUE	4	411	0.973236	Tpossible_mito	ACOX|PALMCOX|SCOX|Q15067	ENSG00000161533
LDHB	L-lactate dehydrogenase B chain OS=Homo sapiens GN=LDHB PE=1 SV=2	4	5	29	13000000	10000000	14000000	13000000	15000000	13000000	11500000	13750000	1.19565	0.257798	0.357675	0.446511	14000000	13500000	1.21739	1.17391	0.283793	0.231326	4	FALSE	TRUE	TRUE	164	411	39.9027	Tpossible_mito	HEL-S-281|LDH-B|LDH-H|LDHBD|TRG-5|P07195	ENSG00000111716
DHRS7	Dehydrogenase/reductase SDR family member 7 OS=Homo sapiens GN=DHRS7 PE=1 SV=1	4	4	14	8800000	11000000	18000000	19000000	16000000	16000000	9900000	17250000	1.74242	0.801096	0.0312215	1.50555	16000000	18500000	1.61616	1.86869	0.692571	0.902025	4	TRUE	TRUE	TRUE	3	411	0.729927	Tnon_mito	SDR34C1|retDSR4|retSDR4|Q9Y394	ENSG00000100612
NME1	Isoform 2 of Nucleoside diphosphate kinase A OS=Homo sapiens GN=NME1	4	4	27	44000000	28000000	44000000	32000000	41000000	36000000	36000000	38250000	1.0625	0.0874628	0.827345	0.0823134	38500000	38000000	1.06944	1.05556	0.0968615	0.0780025	4	FALSE	TRUE	TRUE	123	411	29.927	Tpossible_mito	AWD|GAAD|NB|NBS|NDKA|NDPK-A|NDPKA|NM23|NM23-H1|P15531	ENSG00000239672
GDPD1	Glycerophosphodiester phosphodiesterase domain-containing protein 1 OS=Homo sapiens GN=GDPD1 PE=1 SV=2	1	1	1					5800000		0	1450000	100	6.64386	0.391002	0.407821	2900000	0	100	0	6.64386		1	FALSE	FALSE	FALSE	2	411	0.486618	Tnon_mito	GDE4|Q8N9F7	ENSG00000153982
PDIA6	Isoform 2 of Protein disulfide-isomerase A6 OS=Homo sapiens GN=PDIA6	7	7	29	9700000	15000000	12000000	11000000	9800000	12000000	12350000	11200000	0.906883	-0.141012	0.739594	0.131007	10900000	11500000	0.882591	0.931174	-0.180183	-0.102877	4	FALSE	TRUE	TRUE	129	411	31.3869	Tnon_mito	ERP5|P5|TXNDC7|Q15084	ENSG00000143870
PDIA4	Protein disulfide-isomerase A4 OS=Homo sapiens GN=PDIA4 PE=1 SV=2	2	2	3	4500000	6500000					5500000	0	0		0.114498	0.941201	0	0	0	0			0	FALSE	FALSE	FALSE	59	411	14.3552	Tnon_mito	ERP70|ERP72|ERp-72|P13667	ENSG00000155660
METTL7A	Methyltransferase-like protein 7A (Fragment) OS=Homo sapiens GN=METTL7A PE=4 SV=1	1	1	2			9200000		6900000		0	4025000	100	6.64386	0.18812	0.725564	3450000	4600000	100	100	6.64386	6.64386	2	FALSE	FALSE	FALSE	1	411	0.243309	Tnon_mito	AAM-B|Q9H8H3	ENSG00000185432
RPL18	60S ribosomal protein L18 (Fragment) OS=Homo sapiens GN=RPL18 PE=3 SV=1	4	4	27	14000000	23000000	16000000	13000000	18000000	17000000	18500000	16000000	0.864865	-0.209453	0.676883	0.169486	17500000	14500000	0.945946	0.783784	-0.0801703	-0.351472	4	FALSE	TRUE	TRUE	191	411	46.472	Tnon_mito	L18|Q07020	ENSG00000063177
ACP6	Lysophosphatidic acid phosphatase type 6 OS=Homo sapiens GN=ACP6 PE=1 SV=2	7	7	28			28000000	32000000	28000000	27000000	0	28750000	100	6.64386	0.000125792	3.90035	27500000	30000000	100	100	6.64386	6.64386	4	TRUE	TRUE	TRUE	0	411	0	Tmito	ACPL1|LPAP|PACPL1|Q9NPH0	ENSG00000162836
MRPL48	39S ribosomal protein L48, mitochondrial OS=Homo sapiens GN=MRPL48 PE=1 SV=2	3	3	11			16000000	16000000	14000000	16000000	0	15500000	100	6.64386	7.37499e-05	4.13224	15000000	16000000	100	100	6.64386	6.64386	4	TRUE	TRUE	TRUE	12	411	2.91971	Tmito	HSPC290|L48MT|MRP-L48|Q96GC5	ENSG00000175581
HSD17B12	Estradiol 17-beta-dehydrogenase 12 OS=Homo sapiens GN=HSD17B12 PE=1 SV=2	10	10	52	20000000	18000000	51000000	36000000	49000000	42000000	19000000	44500000	2.34211	1.22781	0.00347382	2.45919	45500000	43500000	2.39474	2.28947	1.25987	1.19502	4	TRUE	TRUE	TRUE	27	411	6.56934	Tnon_mito	KAR|SDR12C1|Q53GQ0	ENSG00000149084
PECR	Peroxisomal trans-2-enoyl-CoA reductase OS=Homo sapiens GN=PECR PE=1 SV=2	2	2	10	7100000	6300000	3000000	6600000	7400000	8900000	6700000	6475000	0.966418	-0.0492809	0.873477	0.0587486	8150000	4800000	1.21642	0.716418	0.282639	-0.481127	4	FALSE	FALSE	TRUE	0	411	0	Tpossible_mito	DCRRP|HPDHASE|HSA250303|PVIARL|SDR29C1|TERP|Q9BY49	ENSG00000115425
CYB5R3	Isoform 3 of NADH-cytochrome b5 reductase 3 OS=Homo sapiens GN=CYB5R3	6	6	19	10000000		22000000	22000000	23000000	22000000	5000000	22250000	4.45	2.15381	0.178831	0.747557	22500000	22000000	4.5	4.4	2.16993	2.1375	4	FALSE	TRUE	TRUE	25	411	6.08273	Tmito	B5R|DIA1|P00387	ENSG00000100243
GGH	Gamma-glutamyl hydrolase OS=Homo sapiens GN=GGH PE=1 SV=2	11	11	80			120000000	91000000	110000000	140000000	0	115250000	100	6.64386	0.00149072	2.8266	125000000	105500000	100	100	6.64386	6.64386	4	TRUE	TRUE	TRUE	6	411	1.45985	Tnon_mito	GH|Q92820	ENSG00000137563
DDX28	Probable ATP-dependent RNA helicase DDX28 OS=Homo sapiens GN=DDX28 PE=1 SV=2	3	3	5			10000000	7500000	7800000	5000000	0	7575000	100	6.64386	0.00510035	2.2924	6400000	8750000	100	100	6.64386	6.64386	4	TRUE	TRUE	TRUE	13	411	3.16302	Tmito	MDDX28|Q9NUL7	ENSG00000182810
RPS9	40S ribosomal protein S9 OS=Homo sapiens GN=RPS9 PE=1 SV=3	11	11	64	93000000	86000000	73000000	72000000	83000000	84000000	89500000	78000000	0.871508	-0.198414	0.102119	0.990892	83500000	72500000	0.932961	0.810056	-0.100111	-0.303907	4	FALSE	TRUE	TRUE	170	411	41.3625	Tnon_mito	S9|P46781	ENSG00000170889
CSNK2A1	Casein kinase II subunit alpha OS=Homo sapiens GN=CSNK2A1 PE=1 SV=1	6	6	12	3500000	7400000		5300000	5500000	8900000	5450000	4925000	0.90367	-0.146133	0.857911	0.0665576	7200000	2650000	1.3211	0.486239	0.401741	-1.04026	3	FALSE	TRUE	TRUE	64	411	15.5718	Tnon_mito	CK2A1|CKII|CSNK2A3|P68400	ENSG00000101266
EPRS	Bifunctional glutamate/proline--tRNA ligase OS=Homo sapiens GN=EPRS PE=1 SV=5	6	6	15	3500000	5000000	6500000	5500000	7000000	6100000	4250000	6275000	1.47647	0.562153	0.184964	0.732914	6550000	6000000	1.54118	1.41176	0.624032	0.4975	4	FALSE	TRUE	TRUE	157	411	38.1995	Tnon_mito	EARS|GLUPRORS|PARS|QARS|QPRS|P07814	ENSG00000136628
EEF1A2	Elongation factor 1-alpha 2 OS=Homo sapiens GN=EEF1A2 PE=1 SV=1	1	9	116					5300000		0	1325000	100	6.64386	0.391002	0.407821	2650000	0	100	0	6.64386		1	FALSE	FALSE	TRUE	343	411	83.455	Tnon_mito	EEF1AL|EF-1-alpha-2|EF1A|HS1|STN|STNL|Q05639	ENSG00000101210
EDF1	Endothelial differentiation-related factor 1 OS=Homo sapiens GN=EDF1 PE=1 SV=1	3	3	11	11000000	15000000	11000000	7500000	11000000	9000000	13000000	9625000	0.740385	-0.433653	0.311242	0.506902	10000000	9250000	0.769231	0.711538	-0.378512	-0.490986	4	FALSE	TRUE	TRUE	80	411	19.4647	Tnon_mito	EDF-1|MBF1|O60869	ENSG00000107223
PKM	Pyruvate kinase PKM OS=Homo sapiens GN=PKM PE=1 SV=4	8	8	20	9800000	6500000	13000000	16000000	12000000	15000000	8150000	14000000	1.71779	0.780555	0.113705	0.94422	13500000	14500000	1.65644	1.77914	0.728087	0.831181	4	FALSE	TRUE	TRUE	249	411	60.5839	Tpossible_mito	CTHBP|HEL-S-30|OIP3|PK3|PKM2|TCB|THBP1|P14618	ENSG00000067225
MCFD2	Multiple coagulation factor deficiency protein 2 OS=Homo sapiens GN=MCFD2 PE=1 SV=1	1	1	6	8700000	7000000	10000000	9100000	7900000	9200000	7850000	9050000	1.15287	0.205225	0.365117	0.437568	8550000	9550000	1.08917	1.21656	0.123232	0.282808	4	FALSE	FALSE	TRUE	1	411	0.243309	Tnon_mito	F5F8D|F5F8D2|LMAN1IP|SDNSF|Q8NI22	ENSG00000180398
HSP90B1	Endoplasmin OS=Homo sapiens GN=HSP90B1 PE=1 SV=1	16	17	75	13000000	17000000	27000000	17000000	19000000	20000000	15000000	20750000	1.38333	0.468149	0.139756	0.854628	19500000	22000000	1.3	1.46667	0.378512	0.552541	4	FALSE	TRUE	TRUE	186	411	45.2555	Tnon_mito	ECGP|GP96|GRP94|HEL-S-125m|HEL35|TRA1|P14625	ENSG00000166598
VCP	Transitional endoplasmic reticulum ATPase OS=Homo sapiens GN=VCP PE=1 SV=4	17	17	102	19000000	20000000	27000000	30000000	29000000	30000000	19500000	29000000	1.48718	0.572579	0.000475889	3.32249	29500000	28500000	1.51282	1.46154	0.597241	0.547488	4	TRUE	TRUE	TRUE	167	411	40.6326	Tnon_mito	ALS14|HEL-220|HEL-S-70|IBMPFD|IBMPFD1|TERA|p97|P55072	ENSG00000165280
MYCBP	C-Myc-binding protein OS=Homo sapiens GN=MYCBP PE=1 SV=3	6	6	106	660000000	690000000	410000000	340000000	520000000	490000000	675000000	440000000	0.651852	-0.617384	0.00713861	2.14639	505000000	375000000	0.748148	0.555556	-0.418604	-0.847997	4	TRUE	TRUE	TRUE	72	411	17.5182	Tpossible_mito	AMY-1|Q99417	ENSG00000214114
RETSAT	All-trans-retinol 13,14-reductase OS=Homo sapiens GN=RETSAT PE=1 SV=2	1	1	1			1300000				0	325000	100	6.64386	0.391002	0.407821	0	650000	0	100		6.64386	1	FALSE	FALSE	FALSE	0	411	0	Tnon_mito	Q6NUM9	ENSG00000042445
DNAH2	Dynein heavy chain 2, axonemal OS=Homo sapiens GN=DNAH2 PE=2 SV=3	1	1	1		22000000					11000000	0	0		0.5	0.30103	0	0	0	0			0	FALSE	FALSE	FALSE	4	411	0.973236	Tnon_mito	DNAHC2|DNHD3|Q9P225	ENSG00000183914
NSF	Vesicle-fusing ATPase OS=Homo sapiens GN=NSF PE=1 SV=3	21	21	88	28000000	29000000	34000000	32000000	37000000	37000000	28500000	35000000	1.22807	0.296393	0.00926481	2.03316	37000000	33000000	1.29825	1.15789	0.376563	0.211504	4	TRUE	TRUE	TRUE	31	411	7.54258	Tnon_mito	SKD2|P46459	ENSG00000073969
FOXRED1	FAD-dependent oxidoreductase domain-containing protein 1 OS=Homo sapiens GN=FOXRED1 PE=1 SV=2	6	6	33	24000000	23000000	16000000	15000000	19000000	19000000	23500000	17250000	0.734043	-0.446064	0.00579073	2.23727	19000000	15500000	0.808511	0.659574	-0.306661	-0.600393	4	TRUE	TRUE	TRUE	1	411	0.243309	Tmito	H17|Q96CU9	ENSG00000110074
DDX1	ATP-dependent RNA helicase DDX1 OS=Homo sapiens GN=DDX1 PE=1 SV=2	23	23	120	37000000	37000000	27000000	26000000	34000000	33000000	37000000	30000000	0.810811	-0.302563	0.0415597	1.38133	33500000	26500000	0.905405	0.716216	-0.143364	-0.481533	4	TRUE	TRUE	TRUE	125	411	30.4136	Tnon_mito	DBP-RB|UKVH5d|Q92499	ENSG00000079785
SNRNP200	U5 small nuclear ribonucleoprotein 200 kDa helicase OS=Homo sapiens GN=SNRNP200 PE=1 SV=2	19	19	50	5700000	2400000000	9200000	9600000	7700000	9000000	1202850000	8875000	0.00737831	-7.08249	0.500845	0.300296	8350000	9400000	0.00694185	0.00781477	-7.17046	-6.99958	4	FALSE	TRUE	TRUE	146	411	35.5231	Tnon_mito	ASCC3L1|BRR2|HELIC2|RP33|U5-200KD|O75643	ENSG00000144028
AGPS	Alkyldihydroxyacetonephosphate synthase, peroxisomal OS=Homo sapiens GN=AGPS PE=1 SV=1	11	11	44	13000000	11000000	14000000	19000000	23000000	15000000	12000000	17750000	1.47917	0.564785	0.0668807	1.1747	19000000	16500000	1.58333	1.375	0.662965	0.459432	4	FALSE	TRUE	TRUE	11	411	2.6764	Tpossible_mito	ADAP-S|ADAS|ADHAPS|ADPS|ALDHPSY|O00116	ENSG00000018510
PPT2	Isoform 3 of Lysosomal thioesterase PPT2 OS=Homo sapiens GN=PPT2	2	2	6	7400000		17000000	16000000	19000000	17000000	3700000	17250000	4.66216	2.221	0.161079	0.79296	18000000	16500000	4.86486	4.45946	2.2824	2.15687	4	FALSE	FALSE	TRUE	0	411	0	Tnon_mito	C6orf8|G14|PPT-2|Q9UMR5	ENSG00000168452
SGTA	Small glutamine-rich tetratricopeptide repeat-containing protein alpha OS=Homo sapiens GN=SGTA PE=1 SV=1	5	5	24	9100000	9000000	16000000	16000000	22000000	18000000	9050000	18000000	1.98895	0.992007	0.00793147	2.10065	20000000	16000000	2.20994	1.76796	1.14401	0.822082	4	TRUE	TRUE	TRUE	19	411	4.62287	Tnon_mito	SGT|alphaSGT|hSGT|O43765	ENSG00000104969
SLC25A6	ADP/ATP translocase 3 OS=Homo sapiens GN=SLC25A6 PE=1 SV=4	1	4	17			6100000	6800000	9300000	11000000	0	8300000	100	6.64386	0.00524264	2.28045	10150000	6450000	100	100	6.64386	6.64386	4	TRUE	FALSE	TRUE	201	411	48.9051	Tmito	2|3|AAC3|ANT|ANT 2|ANT 3|ANT3|ANT3Y|P12236	ENSG00000169100
CCT2	T-complex protein 1 subunit beta OS=Homo sapiens GN=CCT2 PE=1 SV=4	24	24	211	50000000	50000000	120000000	110000000	140000000	130000000	50000000	125000000	2.5	1.32193	0.00136933	2.86349	135000000	115000000	2.7	2.3	1.43296	1.20163	4	TRUE	TRUE	TRUE	180	411	43.7956	Tnon_mito	99D8.1|CCT-beta|CCTB|HEL-S-100n|PRO1633|TCP-1-beta|P78371	ENSG00000166226
RPS3	40S ribosomal protein S3 (Fragment) OS=Homo sapiens GN=RPS3 PE=3 SV=1	1	9	136		19000000		21000000		18000000	9500000	9750000	1.02632	0.0374747	0.984258	0.00689087	9000000	10500000	0.947368	1.10526	-0.0780025	0.14439	2	FALSE	FALSE	TRUE	266	411	64.7202	Tnon_mito	S3|P23396	ENSG00000149273
RPS3	40S ribosomal protein S3 OS=Homo sapiens GN=RPS3 PE=1 SV=2	6	14	202	130000000	120000000	86000000	68000000	83000000	110000000	125000000	86750000	0.694	-0.526992	0.0188709	1.72421	96500000	77000000	0.772	0.616	-0.373327	-0.698998	4	TRUE	TRUE	TRUE	266	411	64.7202	Tnon_mito	S3|P23396	ENSG00000149273
PRKRA	Interferon-inducible double-stranded RNA-dependent protein kinase activator A OS=Homo sapiens GN=PRKRA PE=1 SV=1	1	1	1					11000000		0	2750000	100	6.64386	0.391002	0.407821	5500000	0	100	0	6.64386		1	FALSE	FALSE	FALSE	23	411	5.59611	Tnon_mito	DYT16|PACT|RAX|O75569	ENSG00000180228
NSDHL	Sterol-4-alpha-carboxylate 3-dehydrogenase, decarboxylating OS=Homo sapiens GN=NSDHL PE=1 SV=2	5	5	26	6400000	7600000	8800000	7200000	10000000	16000000	7000000	10500000	1.5	0.584963	0.166827	0.777733	13000000	8000000	1.85714	1.14286	0.893085	0.192645	4	FALSE	TRUE	TRUE	10	411	2.43309	Tnon_mito	H105E3|SDR31E1|XAP104|Q15738	ENSG00000147383
PRDX2	Peroxiredoxin-2 OS=Homo sapiens GN=PRDX2 PE=1 SV=5	2	3	14		14000000	24000000	23000000	26000000	27000000	7000000	25000000	3.57143	1.8365	0.23124	0.635936	26500000	23500000	3.78571	3.35714	1.92057	1.74723	4	FALSE	FALSE	TRUE	205	411	49.8783	Tmito	HEL-S-2a|NKEF-B|NKEFB|PRP|PRX2|PRXII|PTX1|TDPX1|TPX1|TSA|P32119	ENSG00000167815
TXN	Thioredoxin OS=Homo sapiens GN=TXN PE=1 SV=3	3	3	19	45000000	31000000	66000000	38000000	61000000	43000000	38000000	52000000	1.36842	0.452512	0.24939	0.603121	52000000	52000000	1.36842	1.36842	0.452512	0.452512	4	FALSE	TRUE	TRUE	174	411	42.3358	Tpossible_mito	TRDX|TRX|TRX1|P10599	ENSG00000136810
CCT3	T-complex protein 1 subunit gamma OS=Homo sapiens GN=CCT3 PE=1 SV=4	24	24	142	35000000	46000000	110000000	110000000	110000000	120000000	40500000	112500000	2.77778	1.47393	0.0207858	1.68223	115000000	110000000	2.83951	2.71605	1.50564	1.44151	4	TRUE	TRUE	TRUE	165	411	40.146	Tnon_mito	CCT-gamma|CCTG|PIG48|TCP-1-gamma|TRIC5|P49368	ENSG00000163468
AHCY	Adenosylhomocysteinase OS=Homo sapiens GN=AHCY PE=1 SV=4	3	3	11	10000000	9400000	4200000		12000000	10000000	9700000	6550000	0.675258	-0.56649	0.334188	0.476009	11000000	2100000	1.13402	0.216495	0.181447	-2.2076	3	FALSE	TRUE	TRUE	98	411	23.8443	Tnon_mito	SAHH|adoHcyase|P23526	ENSG00000101444
SUGT1	Suppressor of G2 allele of SKP1 homolog OS=Homo sapiens GN=SUGT1 PE=1 SV=3	1	1	1						3500000	0	875000	100	6.64386	0.391002	0.407821	1750000	0	100	0	6.64386		1	FALSE	FALSE	FALSE	39	411	9.48905	Tnon_mito	SGT1|Q9Y2Z0	ENSG00000165416
GNPAT	Dihydroxyacetone phosphate acyltransferase OS=Homo sapiens GN=GNPAT PE=1 SV=1	5	5	16			5800000	7100000	8000000	8200000	0	7275000	100	6.64386	0.000917542	3.03737	8100000	6450000	100	100	6.64386	6.64386	4	TRUE	TRUE	TRUE	5	411	1.21655	Tpossible_mito	DAP-AT|DAPAT|DHAPAT|O15228	ENSG00000116906
PRMT1	Protein arginine N-methyltransferase 1 OS=Homo sapiens GN=PRMT1 PE=4 SV=1	16	16	114	110000000	130000000	82000000	78000000	72000000	77000000	120000000	77250000	0.64375	-0.635428	0.134046	0.872746	74500000	80000000	0.620833	0.666667	-0.687722	-0.584963	4	FALSE	TRUE	TRUE	123	411	29.927	Tnon_mito	ANM1|HCP1|HRMT1L2|IR1B4|Q99873	ENSG00000126457
PSMC6	26S protease regulatory subunit 10B OS=Homo sapiens GN=PSMC6 PE=1 SV=1	13	13	64	14000000	15000000	30000000	29000000	33000000	30000000	14500000	30500000	2.10345	1.07276	8.92165e-05	4.04955	31500000	29500000	2.17241	2.03448	1.1193	1.02466	4	TRUE	TRUE	TRUE	89	411	21.6545	Tnon_mito	CADP44|HEL-S-73|P44|SUG2|p42|P62333	ENSG00000100519
PSMB1	Proteasome subunit beta type-1 OS=Homo sapiens GN=PSMB1 PE=1 SV=2	1	1	2			13000000			13000000	0	6500000	100	6.64386	0.18169	0.740669	6500000	6500000	100	100	6.64386	6.64386	2	FALSE	FALSE	FALSE	76	411	18.4915	Tnon_mito	HC5|PMSB1|PSC5|P20618	ENSG00000008018
PPT1	Palmitoyl-protein thioesterase 1 OS=Homo sapiens GN=PPT1 PE=1 SV=1	4	4	20	34000000	18000000	48000000	53000000	28000000	21000000	26000000	37500000	1.44231	0.528379	0.379353	0.420957	24500000	50500000	0.942308	1.94231	-0.0857299	0.957772	4	FALSE	TRUE	TRUE	5	411	1.21655	Tnon_mito	CLN1|INCL|PPT|P50897	ENSG00000131238
FAM213A	Redox-regulatory protein FAM213A OS=Homo sapiens GN=FAM213A PE=1 SV=3	4	4	25	23000000	25000000	29000000	33000000	35000000	38000000	24000000	33750000	1.40625	0.491853	0.0104254	1.98191	36500000	31000000	1.52083	1.29167	0.604862	0.369234	4	TRUE	TRUE	TRUE	2	411	0.486618	Tmito	C10orf58|PAMM|Q9BRX8	ENSG00000122378
USMG5	Up-regulated during skeletal muscle growth protein 5 OS=Homo sapiens GN=USMG5 PE=1 SV=1	1	1	4			8500000	6600000	9500000	10000000	0	8650000	100	6.64386	0.00140562	2.85213	9750000	7550000	100	100	6.64386	6.64386	4	TRUE	FALSE	FALSE	15	411	3.64964	Tmito	DAPIT|HCVFTP2|bA792D24.4|Q96IX5	ENSG00000173915
RPL8	60S ribosomal protein L8 OS=Homo sapiens GN=RPL8 PE=1 SV=2	2	2	17	36000000	34000000	32000000	28000000	37000000	40000000	35000000	34250000	0.978571	-0.0312509	0.805771	0.0937884	38500000	30000000	1.1	0.857143	0.137504	-0.222392	4	FALSE	FALSE	TRUE	157	411	38.1995	Tnon_mito	L8|P62917	ENSG00000161016
UACA	Uveal autoantigen with coiled-coil domains and ankyrin repeats OS=Homo sapiens GN=UACA PE=1 SV=2	1	1	5				21000000000	14000000000	5500000000	0	10125000000	100	6.64386	0.116575	0.933395	9750000000	10500000000	100	100	6.64386	6.64386	3	FALSE	FALSE	TRUE	6	411	1.45985	Tpossible_mito	NUCLING|Q9BZF9	ENSG00000137831
RPS15	40S ribosomal protein S15 OS=Homo sapiens GN=RPS15 PE=3 SV=1	4	4	31	31000000	40000000	62000000	22000000	34000000	36000000	35500000	38500000	1.08451	0.117039	0.769138	0.113996	35000000	42000000	0.985915	1.1831	-0.0204641	0.24257	4	FALSE	TRUE	TRUE	126	411	30.6569	Tnon_mito	RIG|S15|P62841	ENSG00000115268
RPS15A	40S ribosomal protein S15a OS=Homo sapiens GN=RPS15A PE=1 SV=2	7	7	60	92000000	85000000	84000000	74000000	94000000	89000000	88500000	85250000	0.963277	-0.0539776	0.591359	0.228149	91500000	79000000	1.0339	0.892655	0.0480943	-0.163825	4	FALSE	TRUE	TRUE	178	411	43.309	Tmito	S15a|P62244	ENSG00000134419
THEM6	Protein THEM6 OS=Homo sapiens GN=THEM6 PE=1 SV=2	1	1	1						8900000	0	2225000	100	6.64386	0.391002	0.407821	4450000	0	100	0	6.64386		1	FALSE	FALSE	FALSE	4	411	0.973236	Tnon_mito	C8orf55|DSCD75|Q8WUY1	ENSG00000130193
PYCR1	Isoform 3 of Pyrroline-5-carboxylate reductase 1, mitochondrial OS=Homo sapiens GN=PYCR1	2	3	12	4400000	4500000	12000000	8200000	11000000	13000000	4450000	11050000	2.48315	1.31217	0.0077028	2.11335	12000000	10100000	2.69663	2.26966	1.43116	1.18248	4	TRUE	FALSE	TRUE	17	411	4.13625	Tmito	ARCL2B|ARCL3B|P5C|P5CR|PIG45|PP222|PRO3|PYCR|P32322	ENSG00000183010
PPA1	Inorganic pyrophosphatase OS=Homo sapiens GN=PPA1 PE=1 SV=2	1	1	2					2900000	2900000	0	1450000	100	6.64386	0.18169	0.740669	2900000	0	100	0	6.64386		2	FALSE	FALSE	FALSE	73	411	17.7616	Tnon_mito	HEL-S-66p|IOPPP|PP|PP1|SID6-8061|Q15181	ENSG00000180817
KRT5	SWISS-PROT:P13647 Tax_Id=9606 Gene_Symbol=KRT5 Keratin, type II cytoskeletal 5	13	23	209	87000000	85000000	42000000	43000000	49000000	53000000	86000000	46750000	0.543605	-0.87937	0.000231844	3.6348	51000000	42500000	0.593023	0.494186	-0.753839	-1.01687	4	TRUE	TRUE	TRUE	282	411	68.6131	Tmito	CK5|DDD|DDD1|EBS2|K5|KRT5A|P13647	ENSG00000186081
TUBB4B	Tubulin beta-4B chain OS=Homo sapiens GN=TUBB4B PE=1 SV=1	3	21	301	28000000	24000000	45000000	47000000	54000000	44000000	26000000	47500000	1.82692	0.869416	0.00388655	2.41044	49000000	46000000	1.88462	1.76923	0.91427	0.823122	4	TRUE	TRUE	TRUE	376	411	91.4842	Tnon_mito	Beta2|TUBB2|TUBB2C|P68371	ENSG00000188229
RPL10A	60S ribosomal protein L10a OS=Homo sapiens GN=RPL10A PE=1 SV=2	3	3	14	36000000	34000000	26000000	29000000	36000000	37000000	35000000	32000000	0.914286	-0.129283	0.357798	0.446362	36500000	27500000	1.04286	0.785714	0.0605415	-0.347923	4	FALSE	TRUE	TRUE	117	411	28.4672	Tmito	Csa-19|L10A|NEDD6|P62906	ENSG00000198755
RPL9	60S ribosomal protein L9 OS=Homo sapiens GN=RPL9 PE=1 SV=1	3	3	10		6400000	15000000	8200000	24000000	18000000	3200000	16300000	5.09375	2.34873	0.0628101	1.20197	21000000	11600000	6.5625	3.625	2.71425	1.85798	4	FALSE	TRUE	TRUE	167	411	40.6326	Tnon_mito	L9|NPC-A-16|P32969	ENSG00000163682
RPL23A	60S ribosomal protein L23a OS=Homo sapiens GN=RPL23A PE=3 SV=1	6	6	37	90000000	73000000	58000000	52000000	72000000	68000000	81500000	62500000	0.766871	-0.382944	0.217049	0.663443	70000000	55000000	0.858896	0.674847	-0.219445	-0.567368	4	FALSE	TRUE	TRUE	224	411	54.5012	Tnon_mito	L23A|MDA20|P62750	ENSG00000198242
EIF5B	Eukaryotic translation initiation factor 5B OS=Homo sapiens GN=EIF5B PE=1 SV=4	2	2	3	6700000				8300000	7000000	3350000	3825000	1.14179	0.191299	0.917009	0.0376265	7650000	0	2.28358	0	1.1913		2	FALSE	FALSE	FALSE	86	411	20.9246	Tnon_mito	IF2|O60841	ENSG00000158417
SEC63	Translocation protein SEC63 homolog OS=Homo sapiens GN=SEC63 PE=1 SV=2	3	3	4			4600000		5400000	4700000	0	3675000	100	6.64386	0.0591231	1.22824	5050000	2300000	100	100	6.64386	6.64386	3	FALSE	TRUE	FALSE	11	411	2.6764	Tnon_mito	DNAJC23|ERdj2|PRO2507|SEC63L|Q9UGP8	ENSG00000025796
TUBB	Tubulin beta chain OS=Homo sapiens GN=TUBB PE=1 SV=2	4	22	384	110000000	130000000	220000000	230000000	240000000	190000000	120000000	220000000	1.83333	0.874469	0.00513745	2.28925	215000000	225000000	1.79167	1.875	0.841302	0.906891	4	TRUE	TRUE	TRUE	382	411	92.944	Tnon_mito	M40|OK/SW-cl.56|TUBB1|TUBB5|P07437	ENSG00000183311
HAX1	Isoform 2 of HCLS1-associated protein X-1 OS=Homo sapiens GN=HAX1	2	2	10			7600000	7500000	7600000	7900000	0	7650000	100	6.64386	3.198e-06	5.49512	7750000	7550000	100	100	6.64386	6.64386	4	TRUE	FALSE	TRUE	29	411	7.05596	Tpossible_mito	HCLSBP1|HS1BP1|SCN3|O00165	ENSG00000143575
PSMB5	Proteasome subunit beta type-5 OS=Homo sapiens GN=PSMB5 PE=1 SV=3	4	4	11		6100000	15000000	16000000	15000000	16000000	3050000	15500000	5.08197	2.34539	0.150205	0.823316	15500000	15500000	5.08197	5.08197	2.34539	2.34539	4	FALSE	TRUE	TRUE	92	411	22.3844	Tnon_mito	LMPX|MB1|X|P28074	ENSG00000100804
RPS14	40S ribosomal protein S14 OS=Homo sapiens GN=RPS14 PE=1 SV=3	6	6	96	400000000	430000000	320000000	280000000	340000000	350000000	415000000	322500000	0.777108	-0.363812	0.0218497	1.66056	345000000	300000000	0.831325	0.722892	-0.266515	-0.468149	4	TRUE	TRUE	TRUE	259	411	63.017	Tmito	EMTB|S14|P62263	ENSG00000164587
RPL23	60S ribosomal protein L23 OS=Homo sapiens GN=RPL23 PE=1 SV=1	3	3	23	45000000	49000000	35000000	37000000	51000000	57000000	47000000	45000000	0.957447	-0.0627358	0.745488	0.127559	54000000	36000000	1.14894	0.765957	0.200299	-0.384664	4	FALSE	TRUE	TRUE	243	411	59.1241	Tpossible_mito	L23|rpL17|P62829	ENSG00000125691
ABCF1	ATP-binding cassette sub-family F member 1 OS=Homo sapiens GN=ABCF1 PE=1 SV=2	3	3	10	2600000	2200000	7500000	6500000	6500000	5800000	2400000	6575000	2.73958	1.45396	0.000489529	3.31022	6150000	7000000	2.5625	2.91667	1.35755	1.54432	4	TRUE	TRUE	TRUE	87	411	21.1679	Tnon_mito	ABC27|ABC50|Q8NE71	ENSG00000204574
DARS	Aspartate--tRNA ligase, cytoplasmic OS=Homo sapiens GN=DARS PE=1 SV=2	12	12	31	14000000	13000000	14000000	8300000	12000000	15000000	13500000	12325000	0.912963	-0.131372	0.4982	0.302596	13500000	11150000	1	0.825926	0	-0.275916	4	FALSE	TRUE	TRUE	121	411	29.4404	Tnon_mito	HBSL|P14868	ENSG00000115866
PSMB2	Proteasome subunit beta type-2 OS=Homo sapiens GN=PSMB2 PE=1 SV=1	1	1	2			4300000		4200000		0	2125000	100	6.64386	0.181734	0.740563	2100000	2150000	100	100	6.64386	6.64386	2	FALSE	FALSE	FALSE	72	411	17.5182	Tnon_mito	HC7-I|P49721	ENSG00000126067
RPL5	60S ribosomal protein L5 OS=Homo sapiens GN=RPL5 PE=1 SV=3	5	5	19	15000000	13000000	16000000	5500000	12000000	19000000	14000000	13125000	0.9375	-0.0931094	0.79224	0.101143	15500000	10750000	1.10714	0.767857	0.146841	-0.38109	4	FALSE	TRUE	TRUE	156	411	37.9562	Tnon_mito	DBA6|L5|P46777	ENSG00000122406
CHP1	Calcineurin B homologous protein 1 OS=Homo sapiens GN=CHP1 PE=1 SV=3	3	3	6		6100000			7300000	11000000	3050000	4575000	1.5	0.584963	0.737554	0.132206	9150000	0	3	0	1.58496		2	FALSE	TRUE	TRUE	3	411	0.729927	Tnon_mito	CHP|SLC9A1BP|Sid470p|p22|p24|Q99653	ENSG00000187446
RAB18	Ras-related protein Rab-18 OS=Homo sapiens GN=RAB18 PE=1 SV=1	3	3	3			11000000		4200000		0	3800000	100	6.64386	0.239479	0.620733	2100000	5500000	100	100	6.64386	6.64386	2	FALSE	TRUE	FALSE	12	411	2.91971	Tnon_mito	RAB18LI1|WARBM3|Q9NP72	ENSG00000099246
XRCC6	X-ray repair cross-complementing protein 6 OS=Homo sapiens GN=XRCC6 PE=1 SV=2	12	12	37		8600000	12000000	12000000	14000000	17000000	4300000	13750000	3.19767	1.67702	0.253458	0.596094	15500000	12000000	3.60465	2.7907	1.84986	1.48063	4	FALSE	TRUE	TRUE	176	411	42.8224	Tnon_mito	CTC75|CTCBF|G22P1|KU70|ML8|TLAA|P12956	ENSG00000196419
ELP3	Elongator complex protein 3 OS=Homo sapiens GN=ELP3 PE=1 SV=2	2	2	5				4600000	6200000	5600000	0	4100000	100	6.64386	0.0616858	1.20981	5900000	2300000	100	100	6.64386	6.64386	3	FALSE	FALSE	TRUE	13	411	3.16302	Tnon_mito	KAT9|Q9H9T3	ENSG00000134014
LPCAT1	Lysophosphatidylcholine acyltransferase 1 OS=Homo sapiens GN=LPCAT1 PE=1 SV=2	2	2	4			4700000		5400000	5200000	0	3825000	100	6.64386	0.0585874	1.2322	5300000	2350000	100	100	6.64386	6.64386	3	FALSE	FALSE	FALSE	7	411	1.70316	Tnon_mito	AYTL2|PFAAP3|lpcat|Q8NF37	ENSG00000153395
TMX3	Protein disulfide-isomerase TMX3 OS=Homo sapiens GN=TMX3 PE=1 SV=2	1	1	2			2300000	2600000			0	1225000	100	6.64386	0.182881	0.737831	0	2450000	0	100		6.64386	2	FALSE	FALSE	FALSE	3	411	0.729927	Tnon_mito	PDIA13|TXNDC10|Q96JJ7	ENSG00000166479
EEF1A1	Elongation factor 1-alpha 1 OS=Homo sapiens GN=EEF1A1 PE=1 SV=1	7	15	212	170000000	200000000	190000000	200000000	230000000	250000000	185000000	217500000	1.17568	0.23349	0.216994	0.663553	240000000	195000000	1.2973	1.05405	0.375509	0.0759489	4	FALSE	TRUE	TRUE	350	411	85.1582	Tnon_mito	CCS-3|CCS3|EE1A1|EEF-1|EEF1A|EF-Tu|EF1A|GRAF-1EF|HNGC:16303|LENG7|PTI1|eEF1A-1|P68104	ENSG00000156508
RAB1B	Ras-related protein Rab-1B OS=Homo sapiens GN=RAB1B PE=1 SV=1	5	7	59	12000000	13000000	30000000	30000000	29000000	37000000	12500000	31500000	2.52	1.33342	0.001256	2.90101	33000000	30000000	2.64	2.4	1.40054	1.26303	4	TRUE	TRUE	TRUE	69	411	16.7883	Tpossible_mito	Q9H0U4	ENSG00000174903
CTSD	Cathepsin D OS=Homo sapiens GN=CTSD PE=1 SV=1	6	6	24	18000000	21000000	11000000	9100000	11000000	13000000	19500000	11025000	0.565385	-0.822695	0.0582953	1.23437	12000000	10050000	0.615385	0.515385	-0.70044	-0.956279	4	FALSE	TRUE	TRUE	39	411	9.48905	Tpossible_mito	CLN10|CPSD|HEL-S-130P|P07339	ENSG00000117984
TUBG1	Tubulin gamma-1 chain OS=Homo sapiens GN=TUBG1 PE=1 SV=2	2	2	8	6400000	4900000	9900000	9700000	11000000	10000000	5650000	10150000	1.79646	0.845157	0.0714051	1.14627	10500000	9800000	1.85841	1.73451	0.894067	0.794531	4	FALSE	FALSE	TRUE	47	411	11.4355	Tnon_mito	CDCBM4|GCP-1|TUBG|TUBGCP1|P23258	ENSG00000131462
RPL11	60S ribosomal protein L11 OS=Homo sapiens GN=RPL11 PE=1 SV=2	3	3	22	51000000	46000000	57000000	57000000	67000000	51000000	48500000	58000000	1.19588	0.258068	0.0885699	1.05271	59000000	57000000	1.21649	1.17526	0.28273	0.232977	4	FALSE	TRUE	TRUE	209	411	50.8516	Tnon_mito	DBA7|GIG34|L11|P62913	ENSG00000142676
CIAO1	Probable cytosolic iron-sulfur protein assembly protein CIAO1 OS=Homo sapiens GN=CIAO1 PE=1 SV=1	1	1	1						5300000	0	1325000	100	6.64386	0.391002	0.407821	2650000	0	100	0	6.64386		1	FALSE	FALSE	FALSE	4	411	0.973236	Tnon_mito	CIA1|WDR39|O76071	ENSG00000144021
DPM1	Dolichol-phosphate mannosyltransferase subunit 1 (Fragment) OS=Homo sapiens GN=DPM1 PE=4 SV=1	2	2	8	10000000	9700000	16000000	14000000	16000000	10000000	9850000	14000000	1.42132	0.507231	0.0599575	1.22216	13000000	15000000	1.3198	1.52284	0.400316	0.606767	4	FALSE	FALSE	TRUE	28	411	6.81265	Tnon_mito	CDGIE|MPDS|O60762	ENSG00000000419
PARK7	Protein DJ-1 OS=Homo sapiens GN=PARK7 PE=1 SV=2	1	1	3			9300000		7300000	8600000	0	6300000	100	6.64386	0.0603513	1.21931	7950000	4650000	100	100	6.64386	6.64386	3	FALSE	FALSE	FALSE	58	411	14.1119	Tmito	DJ-1|DJ1|HEL-S-67p|Q99497	ENSG00000116288
RARS	Arginine--tRNA ligase, cytoplasmic OS=Homo sapiens GN=RARS PE=1 SV=2	1	1	1						4800000	0	1200000	100	6.64386	0.391002	0.407821	2400000	0	100	0	6.64386		1	FALSE	FALSE	FALSE	110	411	26.764	Tmito	ArgRS|DALRD1|P54136	ENSG00000113643
FKBP4	Peptidyl-prolyl cis-trans isomerase FKBP4 OS=Homo sapiens GN=FKBP4 PE=1 SV=3	1	1	1					7500000		0	1875000	100	6.64386	0.391002	0.407821	3750000	0	100	0	6.64386		1	FALSE	FALSE	FALSE	95	411	23.1144	Tpossible_mito	FKBP51|FKBP52|FKBP59|HBI|Hsp56|PPIase|p52|Q02790	ENSG00000004478
BSG	Basigin OS=Homo sapiens GN=BSG PE=1 SV=2	2	2	7			12000000	10000000	13000000	12000000	0	11750000	100	6.64386	0.00033509	3.47484	12500000	11000000	100	100	6.64386	6.64386	4	TRUE	FALSE	TRUE	40	411	9.73236	Tpossible_mito	5F7|CD147|EMMPRIN|M6|OK|TCSF|P35613	ENSG00000172270
KIF1B	Isoform 3 of Kinesin-like protein KIF1B OS=Homo sapiens GN=KIF1B	1	1	3			3700000	3600000		4300000	0	2900000	100	6.64386	0.0594306	1.22599	2150000	3650000	100	100	6.64386	6.64386	3	FALSE	FALSE	FALSE	18	411	4.37956	Tmito	CMT2|CMT2A|CMT2A1|HMSNII|KLP|NBLST1|O60333	ENSG00000054523
OGT	Isoform 1 of UDP-N-acetylglucosamine--peptide N-acetylglucosaminyltransferase 110 kDa subunit OS=Homo sapiens GN=OGT	1	27	112						7400000	0	1850000	100	6.64386	0.391002	0.407821	3700000	0	100	0	6.64386		1	FALSE	FALSE	TRUE	55	411	13.382	Tpossible_mito	HRNT1|O-GLCNAC|O15294	ENSG00000147162
OGT	UDP-N-acetylglucosamine--peptide N-acetylglucosaminyltransferase 110 kDa subunit OS=Homo sapiens GN=OGT PE=1 SV=3	3	29	123		6900000	24000000	19000000	17000000	24000000	3450000	21000000	6.08696	2.60572	0.0703106	1.15298	20500000	21500000	5.94203	6.23188	2.57096	2.63967	4	FALSE	TRUE	TRUE	55	411	13.382	Tpossible_mito	HRNT1|O-GLCNAC|O15294	ENSG00000147162
CEP170	Centrosomal protein of 170 kDa OS=Homo sapiens GN=CEP170 PE=1 SV=1	4	4	14	2800000	5600000	11000000	9400000	10000000	10000000	4200000	10100000	2.40476	1.26589	0.132391	0.878142	10000000	10200000	2.38095	2.42857	1.25154	1.28011	4	FALSE	TRUE	TRUE	46	411	11.1922	Tnon_mito	FAM68A|KAB|KIAA0470|Q5SW79	ENSG00000143702
UQCC2	Ubiquinol-cytochrome-c reductase complex assembly factor 2 OS=Homo sapiens GN=UQCC2 PE=1 SV=1	4	4	14		9000000	27000000	37000000	28000000	36000000	4500000	32000000	7.11111	2.83007	0.046212	1.33525	32000000	32000000	7.11111	7.11111	2.83007	2.83007	4	TRUE	TRUE	TRUE	0	411	0	Tmito	C6orf125|Cbp6|M19|MNF1|bA6B20.2|Q9BRT2	ENSG00000137288
TRABD	TraB domain-containing protein OS=Homo sapiens GN=TRABD PE=2 SV=1	1	1	4			8400000	8600000	11000000	6800000	0	8700000	100	6.64386	0.00210003	2.67777	8900000	8500000	100	100	6.64386	6.64386	4	TRUE	FALSE	FALSE	4	411	0.973236	Tnon_mito	LP6054|PP2447|Q9H4I3	ENSG00000170638
BZW2	Basic leucine zipper and W2 domain-containing protein 2 OS=Homo sapiens GN=BZW2 PE=1 SV=1	2	5	35	3900000		8200000	7100000	9000000	7300000	1950000	7900000	4.05128	2.01838	0.187273	0.727525	8150000	7650000	4.17949	3.92308	2.06333	1.97199	4	FALSE	FALSE	TRUE	15	411	3.64964	Tnon_mito	MST017|MSTP017|Q9Y6E2	ENSG00000136261
METTL15	Probable methyltransferase-like protein 15 OS=Homo sapiens GN=METTL15 PE=2 SV=1	1	1	2					2500000	2300000	0	1200000	100	6.64386	0.182242	0.739351	2400000	0	100	0	6.64386		2	FALSE	FALSE	FALSE	1	411	0.243309	Tmito	METT5D1|A6NJ78	ENSG00000169519
CDKN2A	Isoform 5 of Cyclin-dependent kinase inhibitor 2A, isoforms 1/2/3 OS=Homo sapiens GN=CDKN2A	2	2	2			4100000				0	1025000	100	6.64386	0.391002	0.407821	0	2050000	0	100		6.64386	1	FALSE	FALSE	FALSE	25	411	6.08273	Tpossible_mito	ARF|CDK4I|CDKN2|CMM2|INK4|INK4A|MLM|MTS-1|MTS1|P14|P14ARF|P16|P16-INK4A|P16INK4|P16INK4A|P19|P19ARF|TP16|P42771	ENSG00000147889
CCRN4L	Nocturnin OS=Homo sapiens GN=CCRN4L PE=2 SV=2	9	9	52			33000000	29000000	30000000	31000000	0	30750000	100	6.64386	4.70946e-05	4.32703	30500000	31000000	100	100	6.64386	6.64386	4	TRUE	TRUE	TRUE	0	411	0	Tnon_mito	CCR4L|NOC|Q9UK39	ENSG00000151014
FDFT1	Squalene synthase OS=Homo sapiens GN=FDFT1 PE=1 SV=1	9	9	38	8800000	8300000	21000000	23000000	23000000	24000000	8550000	22750000	2.66082	1.41187	5.09636e-05	4.29274	23500000	22000000	2.74854	2.5731	1.45866	1.36351	4	TRUE	TRUE	TRUE	9	411	2.18978	Tnon_mito	DGPT|ERG9|SQS|SS|P37268	ENSG00000079459
GART	Trifunctional purine biosynthetic protein adenosine-3 OS=Homo sapiens GN=GART PE=1 SV=1	1	1	1						2400000	0	600000	100	6.64386	0.391002	0.407821	1200000	0	100	0	6.64386		1	FALSE	FALSE	FALSE	104	411	25.3041	Tnon_mito	AIRS|GARS|GARTF|PAIS|PGFT|PRGS|P22102	ENSG00000159131
ANKFY1	Isoform 4 of Ankyrin repeat and FYVE domain-containing protein 1 OS=Homo sapiens GN=ANKFY1	9	9	35	8900000	7300000	11000000	11000000	13000000	12000000	8100000	11750000	1.45062	0.536667	0.0722608	1.1411	12500000	11000000	1.54321	1.35802	0.625934	0.44151	4	FALSE	TRUE	TRUE	60	411	14.5985	Tnon_mito	ANKHZN|BTBD23|ZFYVE14|Q9P2R3	ENSG00000185722
EIF2B4	Translation initiation factor eIF-2B subunit delta OS=Homo sapiens GN=EIF2B4 PE=2 SV=1	1	1	4	3800000			5100000	4900000		1900000	2500000	1.31579	0.395929	0.822707	0.084755	2450000	2550000	1.28947	1.34211	0.366782	0.424498	2	FALSE	FALSE	FALSE	22	411	5.3528	Tnon_mito	EIF-2B|EIF2B|EIF2Bdelta|Q9UI10	ENSG00000115211
NT5DC2	Isoform 2 of 5'-nucleotidase domain-containing protein 2 OS=Homo sapiens GN=NT5DC2	7	7	17			10000000	8900000	9200000	11000000	0	9775000	100	6.64386	0.000242663	3.615	10100000	9450000	100	100	6.64386	6.64386	4	TRUE	TRUE	TRUE	28	411	6.81265	Tmito	Q9H857	ENSG00000168268
DNAJA2	DnaJ homolog subfamily A member 2 OS=Homo sapiens GN=DNAJA2 PE=1 SV=1	3	3	18	9700000	11000000	15000000	15000000	16000000	17000000	10350000	15750000	1.52174	0.605721	0.0175382	1.75602	16500000	15000000	1.5942	1.44928	0.672835	0.535332	4	TRUE	TRUE	TRUE	90	411	21.8978	Tnon_mito	CPR3|DJ3|DJA2|DNAJ|DNJ3|HIRIP4|PRO3015|RDJ2|O60884	ENSG00000069345
CAD	CAD protein OS=Homo sapiens GN=CAD PE=1 SV=3	10	10	33	4700000	5400000	9000000	9800000	9900000	9600000	5050000	9575000	1.89604	0.922989	0.0133481	1.87458	9750000	9400000	1.93069	1.86139	0.949119	0.896377	4	TRUE	TRUE	TRUE	147	411	35.7664	Tnon_mito	P27708	ENSG00000084774
VARS	Valine--tRNA ligase OS=Homo sapiens GN=VARS PE=1 SV=4	2	2	6	3700000	6700000	8500000	9600000	7800000	9100000	5200000	8750000	1.68269	0.750771	0.237302	0.624698	8450000	9050000	1.625	1.74038	0.70044	0.799406	4	FALSE	FALSE	TRUE	100	411	24.3309	Tpossible_mito	G7A|VARS1|VARS2|P26640	ENSG00000096171
DDX46	Probable ATP-dependent RNA helicase DDX46 OS=Homo sapiens GN=DDX46 PE=1 SV=2	1	1	2				9600000	10000000		0	4900000	100	6.64386	0.181823	0.740352	5000000	4800000	100	100	6.64386	6.64386	2	FALSE	FALSE	FALSE	125	411	30.4136	Tnon_mito	PRPF5|Prp5|Q7L014	ENSG00000145833
DDX41	Probable ATP-dependent RNA helicase DDX41 (Fragment) OS=Homo sapiens GN=DDX41 PE=2 SV=1	1	1	2	5400000				8000000		2700000	2000000	0.740741	-0.432959	0.852838	0.0691336	4000000	0	1.48148	0	0.567041		1	FALSE	FALSE	FALSE	60	411	14.5985	Tnon_mito	ABS|Q9UJV9	ENSG00000183258
PSMA7	Proteasome subunit alpha type-7 OS=Homo sapiens GN=PSMA7 PE=1 SV=1	6	6	20	11000000	7600000	15000000	14000000	12000000	21000000	9300000	15500000	1.66667	0.736966	0.0856443	1.0673	16500000	14500000	1.77419	1.55914	0.827163	0.64075	4	FALSE	TRUE	TRUE	89	411	21.6545	Tnon_mito	C6|HSPC|RC6-1|XAPC7|O14818	ENSG00000101182
PPIH	Peptidyl-prolyl cis-trans isomerase H OS=Homo sapiens GN=PPIH PE=1 SV=1	3	3	13	12000000	12000000	9700000	10000000	7700000	11000000	12000000	9600000	0.8	-0.321928	0.0403425	1.39424	9350000	9850000	0.779167	0.820833	-0.359996	-0.284839	4	TRUE	TRUE	TRUE	15	411	3.64964	Tnon_mito	CYP-20|CYPH|SnuCyp-20|USA-CYP|O43447	ENSG00000171960
PRKACA	cAMP-dependent protein kinase catalytic subunit alpha OS=Homo sapiens GN=PRKACA PE=1 SV=2	4	4	11	5400000		8400000	8600000	7400000	5700000	2700000	7525000	2.78704	1.47873	0.311853	0.50605	6550000	8500000	2.42593	3.14815	1.27854	1.6545	4	FALSE	TRUE	TRUE	11	411	2.6764	Tpossible_mito	PKACA|P17612	ENSG00000072062
CKB	Creatine kinase B-type OS=Homo sapiens GN=CKB PE=1 SV=1	3	3	4	4500000	5500000			7200000		5000000	1800000	0.36	-1.47393	0.173903	0.759694	3600000	0	0.72	0	-0.473931		1	FALSE	TRUE	FALSE	163	411	39.6594	Tpossible_mito	B-CK|BCK|CKBB|HEL-211|HEL-S-29|P12277	ENSG00000166165
EEF2	Elongation factor 2 OS=Homo sapiens GN=EEF2 PE=1 SV=4	13	13	39	6700000	4100000	10000000	13000000	16000000	14000000	5400000	13250000	2.4537	1.29496	0.0243033	1.61433	15000000	11500000	2.77778	2.12963	1.47393	1.0906	4	TRUE	TRUE	TRUE	207	411	50.365	Tnon_mito	EEF-2|EF-2|EF2|SCA26|P13639	ENSG00000167658
RPS5	40S ribosomal protein S5 OS=Homo sapiens GN=RPS5 PE=1 SV=4	10	10	80	73000000	81000000	68000000	79000000	94000000	94000000	77000000	83750000	1.08766	0.121231	0.418612	0.378188	94000000	73500000	1.22078	0.954545	0.287802	-0.0671142	4	FALSE	TRUE	TRUE	160	411	38.9294	Tnon_mito	S5|P46782	ENSG00000083845
GTF3C1	General transcription factor 3C polypeptide 1 OS=Homo sapiens GN=GTF3C1 PE=1 SV=4	1	1	4			6000000	6700000	6200000	6300000	0	6300000	100	6.64386	2.80727e-05	4.55172	6250000	6350000	100	100	6.64386	6.64386	4	TRUE	FALSE	FALSE	39	411	9.48905	Tnon_mito	TFIIIC|TFIIIC220|TFIIICalpha|Q12789	ENSG00000077235
FBXW8	F-box/WD repeat-containing protein 8 OS=Homo sapiens GN=FBXW8 PE=1 SV=2	4	4	9	5200000	5200000	5600000	6200000	6900000	6400000	5200000	6275000	1.20673	0.271104	0.0280415	1.5522	6650000	5900000	1.27885	1.13462	0.354843	0.182203	4	TRUE	TRUE	TRUE	0	411	0	Tnon_mito	FBW6|FBW8|FBX29|FBXO29|FBXW6|Q8N3Y1	ENSG00000174989
FKBP3	Peptidyl-prolyl cis-trans isomerase FKBP3 OS=Homo sapiens GN=FKBP3 PE=1 SV=1	1	1	2	2300000	2500000					2400000	0	0		0.0265105	1.57658	0	0	0	0			0	TRUE	FALSE	FALSE	44	411	10.7056	Tnon_mito	FKBP-25|FKBP-3|FKBP25|PPIase|Q00688	ENSG00000100442
SND1	Staphylococcal nuclease domain-containing protein 1 OS=Homo sapiens GN=SND1 PE=1 SV=1	5	5	6	7100000	5300000		4500000	7700000		6200000	3050000	0.491935	-1.02346	0.206439	0.685208	3850000	2250000	0.620968	0.362903	-0.68741	-1.46234	2	FALSE	TRUE	TRUE	118	411	28.7105	Tmito	TDRD11|p100|Q7KZF4	ENSG00000197157
ARF4	ADP-ribosylation factor 4 OS=Homo sapiens GN=ARF4 PE=1 SV=3	1	2	7	2700000	2300000	4100000	4800000	3300000	3300000	2500000	3875000	1.55	0.632268	0.0291963	1.53467	3300000	4450000	1.32	1.78	0.400538	0.831877	4	TRUE	FALSE	TRUE	67	411	16.3017	Tnon_mito	ARF2|P18085	ENSG00000168374
PDCD6	Programmed cell death protein 6 OS=Homo sapiens GN=PDCD6 PE=1 SV=1	2	2	7	6400000	6600000		5500000	5800000	6600000	6500000	4475000	0.688462	-0.538552	0.272421	0.56476	6200000	2750000	0.953846	0.423077	-0.0681715	-1.24101	3	FALSE	FALSE	TRUE	27	411	6.56934	Tnon_mito	ALG-2|PEF1B|O75340	ENSG00000249915
WDR61	WD repeat-containing protein 61 OS=Homo sapiens GN=WDR61 PE=1 SV=1	5	5	10	10000000	12000000	9000000	10000000	8400000	9100000	11000000	9125000	0.829545	-0.269607	0.289509	0.538339	8750000	9500000	0.795455	0.863636	-0.330149	-0.211504	4	FALSE	TRUE	TRUE	48	411	11.6788	Tnon_mito	REC14|SKI8|Q9GZS3	ENSG00000140395
RPL13A	60S ribosomal protein L13a (Fragment) OS=Homo sapiens GN=RPL13A PE=4 SV=2	2	2	22	13000000	14000000	16000000	15000000	18000000	18000000	13500000	16750000	1.24074	0.311202	0.023333	1.63203	18000000	15500000	1.33333	1.14815	0.415037	0.199309	4	TRUE	FALSE	TRUE	144	411	35.0365	Tnon_mito	L13A|TSTA1|P40429	ENSG00000142541
TUBA1C	Tubulin alpha-1C chain OS=Homo sapiens GN=TUBA1C PE=2 SV=1	2	16	254	10000000	11000000	19000000	19000000	26000000	26000000	10500000	22500000	2.14286	1.09954	0.00766857	2.11529	26000000	19000000	2.47619	1.80952	1.30812	0.85561	4	TRUE	FALSE	TRUE	389	411	94.6472	Tnon_mito	TUBA6|bcm948|Q9BQE3	ENSG00000167553
ACP2	Lysosomal acid phosphatase OS=Homo sapiens GN=ACP2 PE=1 SV=3	1	1	1						4400000	0	1100000	100	6.64386	0.391002	0.407821	2200000	0	100	0	6.64386		1	FALSE	FALSE	FALSE	1	411	0.243309	Tnon_mito	P11117	ENSG00000134575
EFTUD2	116 kDa U5 small nuclear ribonucleoprotein component OS=Homo sapiens GN=EFTUD2 PE=1 SV=1	9	9	29	3300000	6400000	10000000	7700000	9500000	9300000	4850000	9125000	1.88144	0.91184	0.194952	0.710073	9400000	8850000	1.93814	1.82474	0.954676	0.867693	4	FALSE	TRUE	TRUE	162	411	39.4161	Tnon_mito	MFDGA|MFDM|SNRNP116|Snrp116|Snu114|U5-116KD|Q15029	ENSG00000108883
CDS2	Phosphatidate cytidylyltransferase 2 OS=Homo sapiens GN=CDS2 PE=1 SV=1	1	1	2			10000000	10000000			0	5000000	100	6.64386	0.18169	0.740669	0	10000000	0	100		6.64386	2	FALSE	FALSE	FALSE	1	411	0.243309	Tpossible_mito	O95674	ENSG00000101290
PRDX4	Peroxiredoxin-4 OS=Homo sapiens GN=PRDX4 PE=1 SV=1	1	2	5				12000000	13000000		0	6250000	100	6.64386	0.182199	0.739454	6500000	6000000	100	100	6.64386	6.64386	2	FALSE	FALSE	TRUE	161	411	39.1727	Tmito	AOE37-2|HEL-S-97n|PRX-4|Q13162	ENSG00000123131
CCT7	T-complex protein 1 subunit eta OS=Homo sapiens GN=CCT7 PE=1 SV=2	20	20	170	37000000	34000000	82000000	77000000	110000000	84000000	35500000	88250000	2.48592	1.31378	0.00468236	2.32954	97000000	79500000	2.73239	2.23944	1.45017	1.16314	4	TRUE	TRUE	TRUE	172	411	41.8491	Tmito	CCTETA|CCTH|NIP7-1|TCP1ETA|Q99832	ENSG00000135624
CCT4	T-complex protein 1 subunit delta OS=Homo sapiens GN=CCT4 PE=1 SV=4	21	21	177	88000000	90000000	160000000	150000000	170000000	170000000	89000000	162500000	1.82584	0.868562	0.000409694	3.38754	170000000	155000000	1.91011	1.74157	0.933658	0.800391	4	TRUE	TRUE	TRUE	186	411	45.2555	Tnon_mito	CCT-DELTA|Cctd|SRB|P50991	ENSG00000115484
HSPH1	Heat shock 105kDa/110kDa protein 1, isoform CRA_b OS=Homo sapiens GN=HSPH1 PE=2 SV=1	10	10	29	15000000	30000000000	11000000	6900000000	18000000	1900000000	15007500000	2207250000	0.147076	-2.76536	0.54929	0.260199	959000000	3455500000	0.0639014	0.230252	-3.96801	-2.11872	4	FALSE	TRUE	TRUE	119	411	28.9538	Tnon_mito	HSP105|HSP105A|HSP105B|NY-CO-25|Q92598	ENSG00000120694
CCT5	T-complex protein 1 subunit epsilon OS=Homo sapiens GN=CCT5 PE=1 SV=1	20	20	148	43000000	37000000	110000000	81000000	91000000	100000000	40000000	95500000	2.3875	1.2555	0.00139471	2.85552	95500000	95500000	2.3875	2.3875	1.2555	1.2555	4	TRUE	TRUE	TRUE	182	411	44.2822	Tnon_mito	CCT-epsilon|CCTE|HEL-S-69|TCP-1-epsilon|P48643	ENSG00000150753
TXNDC5	Thioredoxin domain-containing protein 5 OS=Homo sapiens GN=TXNDC5 PE=1 SV=2	3	3	7	5200000	4500000	5600000		5000000	7000000	4850000	4400000	0.907216	-0.140481	0.790838	0.101913	6000000	2800000	1.23711	0.57732	0.306978	-0.792558	3	FALSE	TRUE	TRUE	30	411	7.29927	Tnon_mito	ENDOPDI|ERP46|HCC-2|PDIA15|STRF8|UNQ364|Q8NBS9	ENSG00000239264
STRAP	Serine-threonine kinase receptor-associated protein OS=Homo sapiens GN=STRAP PE=2 SV=1	13	13	58	24000000	24000000	29000000	22000000	31000000	26000000	24000000	27000000	1.125	0.169925	0.222981	0.651732	28500000	25500000	1.1875	1.0625	0.247928	0.0874628	4	FALSE	TRUE	TRUE	93	411	22.6277	Tpossible_mito	MAWD|PT-WD|UNRIP|Q9Y3F4	ENSG00000023734
P4HB	Protein disulfide-isomerase OS=Homo sapiens GN=P4HB PE=1 SV=3	11	11	59	14000000	21000000	17000000	20000000	21000000	22000000	17500000	20000000	1.14286	0.192645	0.602882	0.219768	21500000	18500000	1.22857	1.05714	0.296982	0.0801703	4	FALSE	TRUE	TRUE	115	411	27.9805	Tmito	DSI|ERBA2L|GIT|P4Hbeta|PDI|PDIA1|PHDB|PO4DB|PO4HB|PROHB|P07237	ENSG00000185624
PRDX1	Peroxiredoxin-1 OS=Homo sapiens GN=PRDX1 PE=1 SV=1	9	11	69	52000000	48000000	100000000	99000000	130000000	120000000	50000000	112250000	2.245	1.16672	0.00274653	2.56122	125000000	99500000	2.5	1.99	1.32193	0.992768	4	TRUE	TRUE	TRUE	253	411	61.5572	Tpossible_mito	MSP23|NKEF-A|NKEFA|PAG|PAGA|PAGB|PRX1|PRXI|TDPX2|Q06830	ENSG00000117450
RPS16	40S ribosomal protein S16 OS=Homo sapiens GN=RPS16 PE=1 SV=2	7	7	70	290000000	280000000	190000000	180000000	240000000	230000000	285000000	210000000	0.736842	-0.440573	0.0111046	1.9545	235000000	185000000	0.824561	0.649123	-0.278301	-0.623437	4	TRUE	TRUE	TRUE	211	411	51.3382	Tnon_mito	S16|P62249	ENSG00000105193
DNAJC7	DnaJ homolog subfamily C member 7 OS=Homo sapiens GN=DNAJC7 PE=1 SV=2	4	4	12	3300000	3200000	7500000	7900000	7500000	10000000	3250000	8225000	2.53077	1.33958	0.00351172	2.45448	8750000	7700000	2.69231	2.36923	1.42884	1.24442	4	TRUE	TRUE	TRUE	59	411	14.3552	Tnon_mito	DJ11|DJC7|TPR2|TTC2|Q99615	ENSG00000168259
STK25	Serine/threonine-protein kinase 25 (Fragment) OS=Homo sapiens GN=STK25 PE=4 SV=1	1	1	1		56000000					28000000	0	0		0.5	0.30103	0	0	0	0			0	FALSE	FALSE	FALSE	17	411	4.13625	Tnon_mito	SOK1|YSK1|O00506	ENSG00000115694
CMBL	Carboxymethylenebutenolidase homolog OS=Homo sapiens GN=CMBL PE=1 SV=1	1	1	2						6800000	0	1700000	100	6.64386	0.391002	0.407821	3400000	0	100	0	6.64386		1	FALSE	FALSE	FALSE	114	411	27.7372	Tnon_mito	JS-1|Q96DG6	ENSG00000164237
PDIA3	Protein disulfide-isomerase A3 OS=Homo sapiens GN=PDIA3 PE=1 SV=4	4	6	16	6000000	6700000	7400000	5700000	5100000	8500000	6350000	6675000	1.05118	0.0720112	0.72362	0.14049	6800000	6550000	1.07087	1.0315	0.0987782	0.0447383	4	FALSE	TRUE	TRUE	104	411	25.3041	Tnon_mito	ER60|ERp57|ERp60|ERp61|GRP57|GRP58|HEL-S-269|HEL-S-93n|HsT17083|P58|PI-PLC|P30101	ENSG00000167004
PDIA3	Thioredoxin (Fragment) OS=Homo sapiens GN=PDIA3 PE=2 SV=1	1	3	10	8200000	9000000	7100000	7200000	7900000		8600000	5550000	0.645349	-0.631849	0.199651	0.699729	3950000	7150000	0.459302	0.831395	-1.12248	-0.266393	3	FALSE	FALSE	TRUE	104	411	25.3041	Tnon_mito	ER60|ERp57|ERp60|ERp61|GRP57|GRP58|HEL-S-269|HEL-S-93n|HsT17083|P58|PI-PLC|P30101	ENSG00000167004
HSPA4	Heat shock 70 kDa protein 4 OS=Homo sapiens GN=HSPA4 PE=1 SV=4	19	20	101	20000000	19000000	29000000	26000000	33000000	36000000	19500000	31000000	1.58974	0.668794	0.0115787	1.93634	34500000	27500000	1.76923	1.41026	0.823122	0.495957	4	TRUE	TRUE	TRUE	133	411	32.3601	Tpossible_mito	APG-2|HEL-S-5a|HS24/P52|HSPH2|RY|hsp70|hsp70RY|P34932	ENSG00000170606
HSPA5	78 kDa glucose-regulated protein OS=Homo sapiens GN=HSPA5 PE=1 SV=2	23	25	397	140000000	120000000	150000000	150000000	150000000	150000000	130000000	150000000	1.15385	0.206451	0.295167	0.529932	150000000	150000000	1.15385	1.15385	0.206451	0.206451	4	FALSE	TRUE	TRUE	360	411	87.5912	Tpossible_mito	BIP|GRP78|HEL-S-89n|MIF2|P11021	ENSG00000044574
HSPA8	Heat shock cognate 71 kDa protein OS=Homo sapiens GN=HSPA8 PE=1 SV=1	21	24	319	130000000	110000000	170000000	150000000	250000000	250000000	120000000	205000000	1.70833	0.77259	0.043299	1.36352	250000000	160000000	2.08333	1.33333	1.05889	0.415037	4	TRUE	TRUE	TRUE	396	411	96.3504	Tnon_mito	HEL-33|HEL-S-72p|HSC54|HSC70|HSC71|HSP71|HSP73|HSPA10|LAP1|NIP71|P11142	ENSG00000109971
HSP90AA1	Isoform 2 of Heat shock protein HSP 90-alpha OS=Homo sapiens GN=HSP90AA1	11	23	235	39000000	38000000	87000000	75000000	85000000	79000000	38500000	81500000	2.11688	1.08194	0.000423756	3.37288	82000000	81000000	2.12987	2.1039	1.09077	1.07306	4	TRUE	TRUE	TRUE	272	411	66.18	Tpossible_mito	EL52|HSP86|HSP89A|HSP90A|HSP90N|HSPC1|HSPCA|HSPCAL1|HSPCAL4|HSPN|Hsp89|Hsp90|LAP2|P07900	ENSG00000080824
HSP90AB1	Heat shock protein HSP 90-beta OS=Homo sapiens GN=HSP90AB1 PE=1 SV=4	15	28	303	54000000	63000000	120000000	120000000	120000000	120000000	58500000	120000000	2.05128	1.03653	0.0464991	1.33256	120000000	120000000	2.05128	2.05128	1.03653	1.03653	4	TRUE	TRUE	TRUE	277	411	67.3966	Tpossible_mito	D6S182|HSP84|HSP90B|HSPC2|HSPCB|P08238	ENSG00000096384
LDHA	Isoform 3 of L-lactate dehydrogenase A chain OS=Homo sapiens GN=LDHA	4	5	20	6200000		5800000	3900000	6300000	5400000	3100000	5350000	1.72581	0.787271	0.599217	0.222416	5850000	4850000	1.8871	1.56452	0.916168	0.645717	4	FALSE	TRUE	TRUE	140	411	34.0633	Tpossible_mito	GSD11|HEL-S-133P|LDH1|LDHM|P00338	ENSG00000134333
RPS11	40S ribosomal protein S11 OS=Homo sapiens GN=RPS11 PE=1 SV=3	9	9	98	140000000	150000000	110000000	90000000	130000000	140000000	145000000	117500000	0.810345	-0.303392	0.0889102	1.05105	135000000	100000000	0.931034	0.689655	-0.103093	-0.536053	4	FALSE	TRUE	TRUE	151	411	36.7397	Tnon_mito	S11|P62280	ENSG00000142534
RPS23	40S ribosomal protein S23 OS=Homo sapiens GN=RPS23 PE=1 SV=3	2	2	24	70000000	100000000	62000000	57000000	68000000	74000000	85000000	65250000	0.767647	-0.381485	0.40456	0.393017	71000000	59500000	0.835294	0.7	-0.259644	-0.514573	4	FALSE	FALSE	TRUE	160	411	38.9294	Tnon_mito	S23|P62266	ENSG00000186468
HYOU1	Hypoxia up-regulated protein 1 OS=Homo sapiens GN=HYOU1 PE=1 SV=1	3	3	5			8000000	3800000	9500000	9600000	0	7725000	100	6.64386	0.0107803	1.96737	9550000	5900000	100	100	6.64386	6.64386	4	TRUE	TRUE	TRUE	50	411	12.1655	Tnon_mito	GRP-170|Grp170|HSP12A|ORP-150|ORP150|Q9Y4L1	ENSG00000149428
HSPA4L	Heat shock 70 kDa protein 4L OS=Homo sapiens GN=HSPA4L PE=2 SV=2	4	5	11				7600000	4400000	6700000	0	4675000	100	6.64386	0.0705247	1.15166	5550000	3800000	100	100	6.64386	6.64386	3	FALSE	TRUE	TRUE	74	411	18.0049	Tnon_mito	APG-1|HSPH3|Osp94|O95757	ENSG00000164070
PAICS	Isoform 2 of Multifunctional protein ADE2 OS=Homo sapiens GN=PAICS	9	9	48	15000000	10000000	16000000	18000000	17000000	18000000	12500000	17250000	1.38	0.464668	0.299791	0.523182	17500000	17000000	1.4	1.36	0.485427	0.443607	4	FALSE	TRUE	TRUE	106	411	25.7908	Tmito	ADE2|ADE2H1|AIRC|PAIS|P22234	ENSG00000128050
SIGMAR1	Sigma non-opioid intracellular receptor 1 OS=Homo sapiens GN=SIGMAR1 PE=1 SV=1	1	1	3			10000000		12000000	12000000	0	8500000	100	6.64386	0.0595765	1.22492	12000000	5000000	100	100	6.64386	6.64386	3	FALSE	FALSE	FALSE	1	411	0.243309	Tnon_mito	ALS16|OPRS1|SIG-1R|SR-BP|SR-BP1|SRBP|hSigmaR1|sigma1R|Q99720	ENSG00000147955
TFRC	Transferrin receptor protein 1 OS=Homo sapiens GN=TFRC PE=1 SV=2	13	13	39	15000000	4500000	17000000	8700000	10000000	13000000	9750000	12175000	1.24872	0.320448	0.726043	0.139038	11500000	12850000	1.17949	1.31795	0.23816	0.398294	4	FALSE	TRUE	TRUE	47	411	11.4355	Tpossible_mito	CD71|T9|TFR|TFR1|TR|TRFR|p90|P02786	ENSG00000072274
RAD23B	UV excision repair protein RAD23 homolog B OS=Homo sapiens GN=RAD23B PE=1 SV=1	1	1	1						12000000	0	3000000	100	6.64386	0.391002	0.407821	6000000	0	100	0	6.64386		1	FALSE	FALSE	FALSE	23	411	5.59611	Tnon_mito	HHR23B|HR23B|P58|P54727	ENSG00000119318
BAG3	BAG family molecular chaperone regulator 3 OS=Homo sapiens GN=BAG3 PE=1 SV=3	1	1	1				4600000			0	1150000	100	6.64386	0.391002	0.407821	0	2300000	0	100		6.64386	1	FALSE	FALSE	FALSE	27	411	6.56934	Tnon_mito	BAG-3|BIS|CAIR-1|MFM6|O95817	ENSG00000151929
DCTN1	Dynactin subunit 1 OS=Homo sapiens GN=DCTN1 PE=1 SV=3	12	12	39	8000000	6700000	11000000	9900000	10000000	10000000	7350000	10225000	1.39116	0.476285	0.103096	0.986758	10000000	10450000	1.36054	1.42177	0.444184	0.507687	4	FALSE	TRUE	TRUE	85	411	20.6813	Tnon_mito	DAP-150|DP-150|P135|Q14203	ENSG00000204843
RPS29	Isoform 2 of 40S ribosomal protein S29 OS=Homo sapiens GN=RPS29	3	3	22	34000000	60000000	71000000	75000000	38000000	39000000	47000000	55750000	1.18617	0.246311	0.641358	0.192899	38500000	73000000	0.819149	1.55319	-0.287802	0.635236	4	FALSE	TRUE	TRUE	63	411	15.3285	Tnon_mito	S29|P62273	ENSG00000213741
SGPL1	Sphingosine-1-phosphate lyase 1 OS=Homo sapiens GN=SGPL1 PE=1 SV=3	4	4	6			12000000	12000000	5700000	6800000	0	9125000	100	6.64386	0.0121477	1.91551	6250000	12000000	100	100	6.64386	6.64386	4	TRUE	TRUE	TRUE	10	411	2.43309	Tnon_mito	S1PL|SPL|O95470	ENSG00000166224
REEP5	Receptor expression-enhancing protein 5 OS=Homo sapiens GN=REEP5 PE=1 SV=3	2	2	6		27000000	5800000	5800000	71000000	35000000	13500000	29400000	2.17778	1.12286	0.489156	0.310553	53000000	5800000	3.92593	0.42963	1.97303	-1.21883	4	FALSE	FALSE	TRUE	4	411	0.973236	Tnon_mito	C5orf18|D5S346|DP1|TB2|YOP1|Q00765	ENSG00000129625
PLD3	Phospholipase D3 OS=Homo sapiens GN=PLD3 PE=1 SV=1	1	1	3				2200000	1700000	1900000	0	1450000	100	6.64386	0.0607824	1.21622	1800000	1100000	100	100	6.64386	6.64386	3	FALSE	FALSE	FALSE	17	411	4.13625	Tnon_mito	HU-K4|HUK4|Q8IV08	ENSG00000105223
WBSCR16	Williams-Beuren syndrome chromosomal region 16 protein OS=Homo sapiens GN=WBSCR16 PE=1 SV=2	1	1	1						6900000	0	1725000	100	6.64386	0.391002	0.407821	3450000	0	100	0	6.64386		1	FALSE	FALSE	FALSE	9	411	2.18978	Tmito	Q96I51	ENSG00000174374
C17orf80	Uncharacterized protein C17orf80 OS=Homo sapiens GN=C17orf80 PE=2 SV=2	11	11	42			14000000	14000000	18000000	17000000	0	15750000	100	6.64386	0.000608788	3.21553	17500000	14000000	100	100	6.64386	6.64386	4	TRUE	TRUE	TRUE	0	411	0	Tnon_mito	HLC-8|MIG3|SPEP1|Q9BSJ5	ENSG00000141219
EIF5A	Eukaryotic translation initiation factor 5A-1 OS=Homo sapiens GN=EIF5A PE=2 SV=1	3	3	6	4700000	13000000	16000000			13000000	8850000	7250000	0.819209	-0.287696	0.804366	0.0945461	6500000	8000000	0.734463	0.903955	-0.445238	-0.145677	2	FALSE	TRUE	TRUE	125	411	30.4136	Tnon_mito	EIF-5A|EIF5A1|eIF5AI|P63241	ENSG00000132507
GSPT1	Isoform 3 of Eukaryotic peptide chain release factor GTP-binding subunit ERF3A OS=Homo sapiens GN=GSPT1	2	2	4			9000000	7700000	9800000	5300000	0	7950000	100	6.64386	0.00395745	2.40258	7550000	8350000	100	100	6.64386	6.64386	4	TRUE	FALSE	FALSE	59	411	14.3552	Tnon_mito	551G9.2|ETF3A|GST1|eRF3a|P15170	ENSG00000103342
MARS	Methionine--tRNA ligase, cytoplasmic OS=Homo sapiens GN=MARS PE=1 SV=2	7	7	22	8500000	7500000	10000000	9800000	12000000	12000000	8000000	10950000	1.36875	0.452859	0.0246786	1.60768	12000000	9900000	1.5	1.2375	0.584963	0.307429	4	TRUE	TRUE	TRUE	107	411	26.0341	Tpossible_mito	METRS|MRS|MTRNS|P56192	ENSG00000166986
PA2G4	Proliferation-associated protein 2G4 OS=Homo sapiens GN=PA2G4 PE=1 SV=3	7	7	42	19000000	17000000	26000000	22000000	30000000	29000000	18000000	26750000	1.48611	0.571542	0.0131351	1.88157	29500000	24000000	1.63889	1.33333	0.712718	0.415037	4	TRUE	TRUE	TRUE	104	411	25.3041	Tnon_mito	EBP1|HG4-1|p38-2G4|Q9UQ80	ENSG00000170515
DNAJB11	DnaJ homolog subfamily B member 11 OS=Homo sapiens GN=DNAJB11 PE=1 SV=1	1	1	5	8100000		6300000	6200000	5600000	7400000	4050000	6375000	1.57407	0.654503	0.668102	0.175157	6500000	6250000	1.60494	1.54321	0.682518	0.625934	4	FALSE	FALSE	TRUE	52	411	12.6521	Tnon_mito	ABBP-2|ABBP2|DJ9|Dj-9|EDJ|ERdj3|ERj3|ERj3p|PRO1080|UNQ537|hDj-9|Q9UBS4	ENSG00000090520
EXOSC4	Exosome complex component RRP41 OS=Homo sapiens GN=EXOSC4 PE=1 SV=3	2	2	7	6700000	6400000	7400000	9000000	8300000		6550000	6175000	0.942748	-0.0850558	0.868905	0.0610278	4150000	8200000	0.633588	1.25191	-0.658384	0.324129	3	FALSE	FALSE	TRUE	33	411	8.0292	Tnon_mito	RRP41|RRP41A|Rrp41p|SKI6|Ski6p|hRrp41p|p12A|Q9NPD3	ENSG00000178896
ANKLE1	Ankyrin repeat and LEM domain-containing protein 1 OS=Homo sapiens GN=ANKLE1 PE=2 SV=2	1	1	1					2300000		0	575000	100	6.64386	0.391002	0.407821	1150000	0	100	0	6.64386		1	FALSE	FALSE	FALSE	1	411	0.243309	Tnon_mito	ANKRD41|LEM3|LEMD6|Q8NAG6	ENSG00000160117
ACOT12	Acyl-coenzyme A thioesterase 12 OS=Homo sapiens GN=ACOT12 PE=1 SV=1	1	1	1		140000000					70000000	0	0		0.5	0.30103	0	0	0	0			0	FALSE	FALSE	FALSE	0	411	0	Tnon_mito	CACH-1|Cach|STARD15|THEAL|Q8WYK0	ENSG00000172497
RPS13	40S ribosomal protein S13 OS=Homo sapiens GN=RPS13 PE=1 SV=2	6	6	57	110000000	140000000	63000000	76000000	92000000	110000000	125000000	85250000	0.682	-0.552156	0.160205	0.795323	101000000	69500000	0.808	0.556	-0.307573	-0.846843	4	FALSE	TRUE	TRUE	158	411	38.4428	Tnon_mito	S13|P62277	ENSG00000110700
GNS	N-acetylglucosamine-6-sulfatase OS=Homo sapiens GN=GNS PE=2 SV=1	1	1	3	3600000	5600000		4200000			4600000	1050000	0.228261	-2.13124	0.0878641	1.05619	0	2100000	0	0.456522		-1.13124	1	FALSE	FALSE	FALSE	6	411	1.45985	Tnon_mito	G6S|P15586	ENSG00000135677
PRKDC	DNA-dependent protein kinase catalytic subunit OS=Homo sapiens GN=PRKDC PE=1 SV=3	30	30	61	3500000	4100000	45000000	36000000	58000000	47000000	3800000	46500000	12.2368	3.61316	0.00243872	2.61284	52500000	40500000	13.8158	10.6579	3.78825	3.41385	4	TRUE	TRUE	TRUE	175	411	42.5791	Tnon_mito	DNA-PKcs|DNAPK|DNPK1|HYRC|HYRC1|XRCC7|p350|P78527	ENSG00000253729
RPSA	40S ribosomal protein SA OS=Homo sapiens GN=RPSA PE=1 SV=4	14	14	171	240000000	220000000	190000000	170000000	210000000	210000000	230000000	195000000	0.847826	-0.23816	0.0893679	1.04882	210000000	180000000	0.913043	0.782609	-0.131245	-0.353637	4	FALSE	TRUE	TRUE	160	411	38.9294	Tnon_mito	37LRP|67LR|LAMBR|LAMR1|LBP|LBP/p40|LRP|LRP/LR|NEM/1CHD4|SA|lamR|p40|P08865	ENSG00000168028
RPL17	Isoform 3 of 60S ribosomal protein L17 OS=Homo sapiens GN=RPL17	2	2	8	26000000	28000000	34000000	27000000	18000000	25000000	27000000	26000000	0.962963	-0.0544478	0.787718	0.103629	21500000	30500000	0.796296	1.12963	-0.328623	0.17585	4	FALSE	FALSE	TRUE	190	411	46.2287	Tnon_mito	L17|PD-1|RPL23|P18621	ENSG00000215472
RPS2	40S ribosomal protein S2 OS=Homo sapiens GN=RPS2 PE=1 SV=2	12	12	142	160000000	150000000	280000000	270000000	300000000	310000000	155000000	290000000	1.87097	0.903785	0.000206279	3.68555	305000000	275000000	1.96774	1.77419	0.976541	0.827163	4	TRUE	TRUE	TRUE	210	411	51.0949	Tnon_mito	LLREP3|S2|P15880	ENSG00000140988
RPS20	Isoform 2 of 40S ribosomal protein S20 OS=Homo sapiens GN=RPS20	4	4	64	210000000	190000000	150000000	150000000	210000000	190000000	200000000	175000000	0.875	-0.192645	0.238986	0.621627	200000000	150000000	1	0.75	0	-0.415037	4	FALSE	TRUE	TRUE	179	411	43.5523	Tnon_mito	S20|P60866	ENSG00000008988
TCP1	T-complex protein 1 subunit alpha OS=Homo sapiens GN=TCP1 PE=1 SV=1	27	27	207	39000000	37000000	100000000	91000000	99000000	96000000	38000000	96500000	2.53947	1.34453	1.49306e-05	4.82592	97500000	95500000	2.56579	2.51316	1.3594	1.3295	4	TRUE	TRUE	TRUE	184	411	44.7689	Tnon_mito	CCT-alpha|CCT1|CCTa|D6S230E|TCP-1-alpha|P17987	ENSG00000120438
CCT8	T-complex protein 1 subunit theta OS=Homo sapiens GN=CCT8 PE=1 SV=4	25	25	246	81000000	110000000	160000000	150000000	180000000	160000000	95500000	162500000	1.70157	0.766867	0.0924802	1.03395	170000000	155000000	1.7801	1.62304	0.831962	0.698696	4	FALSE	TRUE	TRUE	183	411	44.5255	Tnon_mito	C21orf112|Cctq|D21S246|PRED71|P50990	ENSG00000156261
TXNDC12	Thioredoxin domain-containing protein 12 OS=Homo sapiens GN=TXNDC12 PE=1 SV=1	8	8	109	260000000	290000000	210000000	210000000	300000000	280000000	275000000	250000000	0.909091	-0.137504	0.42035	0.376389	290000000	210000000	1.05455	0.763636	0.0766213	-0.389042	4	FALSE	TRUE	TRUE	63	411	15.3285	Tmito	AG1|AGR1|ERP16|ERP18|ERP19|PDIA16|TLP19|hAG-1|hTLP19|O95881	ENSG00000117862
GSTP1	Glutathione S-transferase P OS=Homo sapiens GN=GSTP1 PE=1 SV=2	3	3	5	8700000	8200000	8000000			6600000	8450000	3650000	0.431953	-1.21105	0.108431	0.964846	3300000	4000000	0.390533	0.473373	-1.35649	-1.07895	2	FALSE	TRUE	TRUE	74	411	18.0049	Tpossible_mito	DFN7|FAEES3|GST3|GSTP|HEL-S-22|PI|P09211	ENSG00000084207
OTOP3	Otopetrin-3 OS=Homo sapiens GN=OTOP3 PE=1 SV=1	1	1	1		4800000					2400000	0	0		0.5	0.30103	0	0	0	0			0	FALSE	FALSE	FALSE	0	411	0	Tnon_mito	Q7RTS5	ENSG00000182938
PSMA2	Proteasome subunit alpha type-2 OS=Homo sapiens GN=PSMA2 PE=1 SV=2	1	1	4			3700000	5600000	6000000	9400000	0	6175000	100	6.64386	0.0137799	1.86075	7700000	4650000	100	100	6.64386	6.64386	4	TRUE	FALSE	FALSE	93	411	22.6277	Tnon_mito	HC3|MU|PMSA2|PSC2|P25787	ENSG00000106588
BRI3BP	BRI3-binding protein OS=Homo sapiens GN=BRI3BP PE=1 SV=1	2	2	6	9700000		22000000	25000000	18000000	20000000	4850000	21250000	4.38144	2.13141	0.157505	0.802707	19000000	23500000	3.91753	4.84536	1.96994	2.2766	4	FALSE	FALSE	TRUE	5	411	1.21655	Tpossible_mito	BNAS1|HCCR-1|HCCR-2|HCCRBP-1|KG19|Q8WY22	ENSG00000184992
EEF1G	Elongation factor 1-gamma OS=Homo sapiens GN=EEF1G PE=1 SV=3	19	19	208	220000000	220000000	220000000	210000000	250000000	230000000	220000000	227500000	1.03409	0.048363	0.444438	0.352189	240000000	215000000	1.09091	0.977273	0.125531	-0.0331669	4	FALSE	TRUE	TRUE	193	411	46.9586	Tnon_mito	EF1G|GIG35|P26641	ENSG00000254772
TRMT112	tRNA methyltransferase 112 homolog OS=Homo sapiens GN=TRMT112 PE=1 SV=1	3	3	32	27000000	28000000	25000000	25000000	33000000	34000000	27500000	29250000	1.06364	0.089005	0.53284	0.273403	33500000	25000000	1.21818	0.909091	0.284729	-0.137504	4	FALSE	TRUE	TRUE	25	411	6.08273	Tnon_mito	HSPC152|HSPC170|TRM112|TRMT11-2|Q9UI30	ENSG00000173113
MSH6	DNA mismatch repair protein Msh6 OS=Homo sapiens GN=MSH6 PE=1 SV=2	1	1	3			3700000		3600000	3900000	0	2800000	100	6.64386	0.0579765	1.23675	3750000	1850000	100	100	6.64386	6.64386	3	FALSE	FALSE	FALSE	56	411	13.6253	Tnon_mito	GTBP|GTMBP|HNPCC5|HSAP|p160|P52701	ENSG00000116062
DNAJC1	DnaJ homolog subfamily C member 1 OS=Homo sapiens GN=DNAJC1 PE=1 SV=1	1	1	1					1400000		0	350000	100	6.64386	0.391002	0.407821	700000	0	100	0	6.64386		1	FALSE	FALSE	FALSE	0	411	0	Tnon_mito	DNAJL1|ERdj1|HTJ1|MTJ1|Q96KC8	ENSG00000136770
MSH2	DNA mismatch repair protein Msh2 OS=Homo sapiens GN=MSH2 PE=1 SV=1	5	5	13			6300000	5000000	5600000	4900000	0	5450000	100	6.64386	0.000452291	3.34458	5250000	5650000	100	100	6.64386	6.64386	4	TRUE	TRUE	TRUE	45	411	10.9489	Tnon_mito	COCA1|FCC1|HNPCC|HNPCC1|LCFS2|P43246	ENSG00000095002
PSMC4	26S protease regulatory subunit 6B OS=Homo sapiens GN=PSMC4 PE=1 SV=2	14	14	92	32000000	30000000	51000000	51000000	59000000	57000000	31000000	54500000	1.75806	0.813988	0.000560388	3.25151	58000000	51000000	1.87097	1.64516	0.903785	0.718229	4	TRUE	TRUE	TRUE	97	411	23.601	Tpossible_mito	MIP224|RPT3|S6|TBP-7|TBP7|P43686	ENSG00000013275
ASCC3	Activating signal cointegrator 1 complex subunit 3 OS=Homo sapiens GN=ASCC3 PE=1 SV=3	1	1	1		5900000					2950000	0	0		0.5	0.30103	0	0	0	0			0	FALSE	FALSE	FALSE	39	411	9.48905	Tnon_mito	ASC1p200|HELIC1|RNAH|Q8N3C0	ENSG00000112249
HNRNPK	Isoform 2 of Heterogeneous nuclear ribonucleoprotein K OS=Homo sapiens GN=HNRNPK	15	15	155	110000000	160000000	88000000	78000000	100000000	95000000	135000000	90250000	0.668519	-0.580961	0.316175	0.500072	97500000	83000000	0.722222	0.614815	-0.469485	-0.701776	4	FALSE	TRUE	TRUE	288	411	70.073	Tnon_mito	CSBP|HNRPK|TUNP|P61978	ENSG00000165119
KIF2A	Isoform 2 of Kinesin-like protein KIF2A OS=Homo sapiens GN=KIF2A	4	4	7			5000000	5400000	6600000	3900000	0	5225000	100	6.64386	0.00257074	2.58994	5250000	5200000	100	100	6.64386	6.64386	4	TRUE	TRUE	TRUE	33	411	8.0292	Tnon_mito	CDCBM3|HK2|KIF2|O00139	ENSG00000068796
PSMA5	Proteasome subunit alpha type-5 OS=Homo sapiens GN=PSMA5 PE=1 SV=3	3	3	17	7300000	8300000	14000000	14000000	16000000	14000000	7800000	14500000	1.85897	0.894507	0.00249204	2.60344	15000000	14000000	1.92308	1.79487	0.943416	0.843881	4	TRUE	TRUE	TRUE	88	411	21.4112	Tnon_mito	PSC5|ZETA|P28066	ENSG00000143106
USP9X	Probable ubiquitin carboxyl-terminal hydrolase FAF-X OS=Homo sapiens GN=USP9X PE=1 SV=3	2	2	10	3300000	2000000	6400000	5700000	6800000	6500000	2650000	6350000	2.39623	1.26076	0.0802654	1.09547	6650000	6050000	2.50943	2.28302	1.32736	1.19094	4	FALSE	FALSE	TRUE	66	411	16.0584	Tnon_mito	DFFRX|FAF|FAM|RP5-1172N10.4|Q93008	ENSG00000124486
AKAP12	A-kinase anchor protein 12 OS=Homo sapiens GN=AKAP12 PE=1 SV=4	9	9	23	5300000	4500000	7000000	8900000	8700000	12000000	4900000	9150000	1.86735	0.90099	0.0217513	1.66252	10350000	7950000	2.11224	1.62245	1.07878	0.698173	4	TRUE	TRUE	TRUE	53	411	12.8954	Tnon_mito	AKAP250|SSeCKS|Q02952	ENSG00000131016
HMOX2	Heme oxygenase 2 OS=Homo sapiens GN=HMOX2 PE=1 SV=2	6	6	13		3300000	16000000	6400000	14000000	7700000	1650000	11025000	6.68182	2.74024	0.0324192	1.4892	10850000	11200000	6.57576	6.78788	2.71716	2.76296	4	TRUE	TRUE	TRUE	3	411	0.729927	Tnon_mito	HO-2|P30519	ENSG00000103415
RPL10	60S ribosomal protein L10 OS=Homo sapiens GN=RPL10 PE=1 SV=4	2	2	4		6700000			9000000	6500000	3350000	3875000	1.15672	0.210035	0.908899	0.0414845	7750000	0	2.31343	0	1.21004		2	FALSE	FALSE	FALSE	146	411	35.5231	Tnon_mito	AUTSX5|DXS648|DXS648E|L10|NOV|QM|P27635	ENSG00000147403
RPL26	60S ribosomal protein L26 OS=Homo sapiens GN=RPL26 PE=1 SV=1	2	2	3	18000000	16000000	2000000				17000000	500000	0.0294118	-5.08746	0.0123807	1.90725	0	1000000	0	0.0588235		-4.08746	1	TRUE	FALSE	FALSE	141	411	34.3066	Tnon_mito	DBA11|L26|P61254	ENSG00000161970
PSMB6	Proteasome subunit beta type-6 OS=Homo sapiens GN=PSMB6 PE=1 SV=4	2	2	11	8800000	7100000	16000000	14000000	14000000	14000000	7950000	14500000	1.8239	0.867026	0.0307856	1.51165	14000000	15000000	1.76101	1.88679	0.8164	0.915936	4	TRUE	FALSE	TRUE	76	411	18.4915	Tnon_mito	DELTA|LMPY|Y|P28072	ENSG00000142507
WARS	Tryptophan--tRNA ligase, cytoplasmic OS=Homo sapiens GN=WARS PE=1 SV=2	3	3	10	3200000	15000000	13000000	14000000	9000000	13000000	9100000	12250000	1.34615	0.428843	0.68762	0.162651	11000000	13500000	1.20879	1.48352	0.273565	0.569021	4	FALSE	TRUE	TRUE	107	411	26.0341	Tnon_mito	GAMMA-2|IFI53|IFP53|P23381	ENSG00000140105
TTC7B	Isoform 2 of Tetratricopeptide repeat protein 7B OS=Homo sapiens GN=TTC7B	5	5	12			7800000	6300000	6300000	8500000	0	7225000	100	6.64386	0.000967524	3.01434	7400000	7050000	100	100	6.64386	6.64386	4	TRUE	TRUE	TRUE	4	411	0.973236	Tnon_mito	TTC7L1|c14_5685|Q86TV6	ENSG00000165914
PPIA	Peptidyl-prolyl cis-trans isomerase A OS=Homo sapiens GN=PPIA PE=1 SV=2	5	5	23	7300000	15000000	21000000	11000000	17000000	11000000	11150000	15000000	1.34529	0.427919	0.492874	0.307264	14000000	16000000	1.25561	1.43498	0.328383	0.521028	4	FALSE	TRUE	TRUE	184	411	44.7689	Tnon_mito	CYPA|CYPH|HEL-S-69p|P62937	ENSG00000196262
RAB2A	Ras-related protein Rab-2A OS=Homo sapiens GN=RAB2A PE=1 SV=1	7	7	16			10000000	10000000	13000000	10000000	0	10750000	100	6.64386	0.000735988	3.13313	11500000	10000000	100	100	6.64386	6.64386	4	TRUE	TRUE	TRUE	35	411	8.51582	Tnon_mito	LHX|RAB2|P61019	ENSG00000104388
RAB7A	Ras-related protein Rab-7a OS=Homo sapiens GN=RAB7A PE=1 SV=1	10	10	52	13000000	13000000	27000000	41000000	41000000	39000000	13000000	37000000	2.84615	1.50901	0.00568114	2.24556	40000000	34000000	3.07692	2.61538	1.62149	1.38702	4	TRUE	TRUE	TRUE	63	411	15.3285	Tnon_mito	PRO2706|RAB7|P51149	ENSG00000075785
RAB14	Ras-related protein Rab-14 OS=Homo sapiens GN=RAB14 PE=1 SV=4	1	2	21					5800000		0	1450000	100	6.64386	0.391002	0.407821	2900000	0	100	0	6.64386		1	FALSE	FALSE	TRUE	40	411	9.73236	Tnon_mito	FBP|RAB-14|P61106	ENSG00000119396
TUBB2B	Tubulin beta-2B chain OS=Homo sapiens GN=TUBB2B PE=1 SV=1	2	17	247		4200000	5200000	6900000	6700000	6000000	2100000	6200000	2.95238	1.56188	0.293219	0.532808	6350000	6050000	3.02381	2.88095	1.59637	1.52655	4	FALSE	FALSE	TRUE	372	411	90.5109	Tnon_mito	PMGYSA|bA506K6.1|Q9BVA1	ENSG00000137285
RHOA	Transforming protein RhoA OS=Homo sapiens GN=RHOA PE=1 SV=1	5	5	28	5700000	9200000	19000000	17000000	10000000	11000000	7450000	14250000	1.91275	0.93565	0.0797376	1.09834	10500000	18000000	1.4094	2.41611	0.495077	1.27268	4	FALSE	TRUE	TRUE	45	411	10.9489	Tpossible_mito	ARH12|ARHA|RHO12|RHOH12|P61586	ENSG00000067560
RAB8A	Ras-related protein Rab-8A OS=Homo sapiens GN=RAB8A PE=2 SV=1	2	4	28				3000000	16000000		0	4750000	100	6.64386	0.301609	0.520556	8000000	1500000	100	100	6.64386	6.64386	2	FALSE	FALSE	TRUE	49	411	11.9221	Tnon_mito	MEL|RAB8|P61006	ENSG00000167461
RAB5C	Isoform 2 of Ras-related protein Rab-5C OS=Homo sapiens GN=RAB5C	5	5	32	13000000	13000000	19000000	19000000	22000000	22000000	13000000	20500000	1.57692	0.657112	0.00323904	2.48958	22000000	19000000	1.69231	1.46154	0.758992	0.547488	4	TRUE	TRUE	TRUE	61	411	14.8418	Tnon_mito	L1880|RAB5CL|RAB5L|RABL|P51148	ENSG00000108774
RAB11B	Ras-related protein Rab-11B OS=Homo sapiens GN=RAB11B PE=1 SV=4	10	10	35	20000000	16000000	28000000	30000000	29000000	36000000	18000000	30750000	1.70833	0.77259	0.0227719	1.6426	32500000	29000000	1.80556	1.61111	0.852443	0.688056	4	TRUE	TRUE	TRUE	47	411	11.4355	Tpossible_mito	H-YPT3|Q15907	ENSG00000185236
RAB10	Ras-related protein Rab-10 OS=Homo sapiens GN=RAB10 PE=1 SV=1	2	4	48	6400000	7600000	12000000	16000000	14000000	17000000	7000000	14750000	2.10714	1.07529	0.00358501	2.44551	15500000	14000000	2.21429	2	1.14684	1	4	TRUE	FALSE	TRUE	56	411	13.6253	Tnon_mito	P61026	ENSG00000084733
CCT6A	T-complex protein 1 subunit zeta OS=Homo sapiens GN=CCT6A PE=1 SV=3	14	14	102	26000000	24000000	69000000	65000000	70000000	69000000	25000000	68250000	2.73	1.4489	4.30685e-05	4.36584	69500000	67000000	2.78	2.68	1.47508	1.42223	4	TRUE	TRUE	TRUE	177	411	43.0657	Tnon_mito	CCT-zeta|CCT-zeta-1|CCT6|Cctz|HTR3|MoDP-2|TCP-1-zeta|TCP20|TCPZ|TTCP20|P40227	ENSG00000146731
PSMB4	Proteasome subunit beta type-4 OS=Homo sapiens GN=PSMB4 PE=1 SV=4	3	3	8	4500000	4600000	9500000	5200000	9300000	9200000	4550000	8300000	1.82418	0.867245	0.036017	1.44349	9250000	7350000	2.03297	1.61538	1.02359	0.691878	4	TRUE	TRUE	TRUE	68	411	16.545	Tnon_mito	HN3|HsN3|PROS-26|PROS26|P28070	ENSG00000159377
RPL31	60S ribosomal protein L31 OS=Homo sapiens GN=RPL31 PE=2 SV=1	2	2	25	67000000	59000000	55000000	60000000	70000000	73000000	63000000	64500000	1.02381	0.0339473	0.812187	0.0903438	71500000	57500000	1.13492	0.912698	0.182591	-0.13179	4	FALSE	FALSE	TRUE	170	411	41.3625	Tnon_mito	L31|P62899	ENSG00000071082
GCN1L1	Translational activator GCN1 OS=Homo sapiens GN=GCN1L1 PE=1 SV=6	43	43	145	5000000	6300000	21000000	20000000	20000000	23000000	5650000	21000000	3.71681	1.89407	0.000335575	3.47421	21500000	20500000	3.80531	3.62832	1.92801	1.8593	4	TRUE	TRUE	TRUE	104	411	25.3041	Tnon_mito	GCN1|GCN1L|PRIC295|Q92616	ENSG00000089154
COMT	Catechol O-methyltransferase OS=Homo sapiens GN=COMT PE=1 SV=2	5	5	9			5700000	8400000	4900000	7800000	0	6700000	100	6.64386	0.00402283	2.39547	6350000	7050000	100	100	6.64386	6.64386	4	TRUE	TRUE	TRUE	12	411	2.91971	Tmito	HEL-S-98n|P21964	ENSG00000093010
DDX5	Probable ATP-dependent RNA helicase DDX5 OS=Homo sapiens GN=DDX5 PE=2 SV=1	7	11	43	11000000	12000000	21000000	22000000	19000000	22000000	11500000	21000000	1.82609	0.868755	0.000475889	3.32249	20500000	21500000	1.78261	1.86957	0.83399	0.902703	4	TRUE	TRUE	TRUE	247	411	60.0973	Tnon_mito	G17P1|HLR1|HUMP68|p68|P17844	ENSG00000108654
DDX17	Probable ATP-dependent RNA helicase DDX17 OS=Homo sapiens GN=DDX17 PE=2 SV=1	2	6	23		2700000			5300000	3500000	1350000	2200000	1.62963	0.704544	0.683956	0.164972	4400000	0	3.25926	0	1.70454		2	FALSE	FALSE	TRUE	238	411	57.9075	Tnon_mito	P72|RH70|Q92841	ENSG00000100201
ACSBG2	Long-chain-fatty-acid--CoA ligase ACSBG2 OS=Homo sapiens GN=ACSBG2 PE=1 SV=2	1	1	1					1100000000		0	275000000	100	6.64386	0.391002	0.407821	550000000	0	100	0	6.64386		1	FALSE	FALSE	FALSE	4	411	0.973236	Tpossible_mito	BGR|BRGL|PRTD-NY3|PRTDNY3|Q5FVE4	ENSG00000130377
RPL3	60S ribosomal protein L3 OS=Homo sapiens GN=RPL3 PE=1 SV=2	6	6	15	12000000	10000000	11000000	11000000	16000000	12000000	11000000	12500000	1.13636	0.184425	0.396436	0.401827	14000000	11000000	1.27273	1	0.347923	0	4	FALSE	TRUE	TRUE	163	411	39.6594	Tnon_mito	ASC-1|L3|TARBP-B|P39023	ENSG00000100316
CORO1C	Isoform 3 of Coronin-1C OS=Homo sapiens GN=CORO1C	5	5	11	10000000	12000000		4900000	4300000	4400000	11000000	3400000	0.309091	-1.6939	0.0113981	1.94317	4350000	2450000	0.395455	0.222727	-1.33842	-2.16665	3	TRUE	TRUE	TRUE	100	411	24.3309	Tnon_mito	HCRNN4|Q9ULV4	ENSG00000110880
ARFGEF2	Brefeldin A-inhibited guanine nucleotide-exchange protein 2 OS=Homo sapiens GN=ARFGEF2 PE=1 SV=3	1	1	1					3200000		0	800000	100	6.64386	0.391002	0.407821	1600000	0	100	0	6.64386		1	FALSE	FALSE	FALSE	2	411	0.486618	Tnon_mito	BIG2|PVNH2|dJ1164I10.1|Q9Y6D5	ENSG00000124198
RNF219	RING finger protein 219 OS=Homo sapiens GN=RNF219 PE=1 SV=1	9	9	43	11000000	9100000	13000000	13000000	14000000	14000000	10050000	13500000	1.34328	0.425764	0.146026	0.835571	14000000	13000000	1.39303	1.29353	0.478231	0.371316	4	FALSE	TRUE	TRUE	17	411	4.13625	Tnon_mito	C13orf7|Q5W0B1	ENSG00000152193
RANBP1	Ran-specific GTPase-activating protein OS=Homo sapiens GN=RANBP1 PE=1 SV=1	2	2	2	6600000		7300000				3300000	1825000	0.55303	-0.85457	0.740217	0.130641	0	3650000	0	1.10606		0.14543	1	FALSE	FALSE	FALSE	90	411	21.8978	Tnon_mito	HTF9A|P43487	ENSG00000099901
MOGS	Mannosyl-oligosaccharide glucosidase OS=Homo sapiens GN=MOGS PE=1 SV=5	7	7	22		7900000	10000000	10000000	11000000	11000000	3950000	10500000	2.65823	1.41046	0.344287	0.463079	11000000	10000000	2.78481	2.53165	1.47758	1.34008	4	FALSE	TRUE	TRUE	15	411	3.64964	Tnon_mito	CDG2B|CWH41|DER7|GCS1|Q13724	ENSG00000115275
EIF4G1	Isoform 9 of Eukaryotic translation initiation factor 4 gamma 1 OS=Homo sapiens GN=EIF4G1	21	21	95	26000000	25000000	37000000	31000000	27000000	28000000	25500000	30750000	1.20588	0.270089	0.0996107	1.00169	27500000	34000000	1.07843	1.33333	0.108934	0.415037	4	FALSE	TRUE	TRUE	102	411	24.8175	Tnon_mito	EIF-4G1|EIF4F|EIF4G|EIF4GI|P220|PARK18|Q04637	ENSG00000114867
DYNLRB1	Dynein light chain roadblock-type 1 OS=Homo sapiens GN=DYNLRB1 PE=1 SV=3	4	4	10		4900000	12000000	11000000	12000000	8700000	2450000	10925000	4.45918	2.15678	0.152167	0.81768	10350000	11500000	4.22449	4.69388	2.07878	2.23078	4	FALSE	TRUE	TRUE	35	411	8.51582	Tnon_mito	BITH|BLP|DNCL2A|DNLC2A|ROBLD1|Q9NP97	ENSG00000125971
ANK3	Ankyrin-3 OS=Homo sapiens GN=ANK3 PE=1 SV=3	1	1	1				5000000			0	1250000	100	6.64386	0.391002	0.407821	0	2500000	0	100		6.64386	1	FALSE	FALSE	FALSE	15	411	3.64964	Tnon_mito	ANKYRIN-G|MRT37|Q12955	ENSG00000151150
DDX3X	ATP-dependent RNA helicase DDX3X OS=Homo sapiens GN=DDX3X PE=1 SV=3	16	16	64	9600000	11000000	19000000	18000000	18000000	19000000	10300000	18500000	1.79612	0.844881	0.0278699	1.55486	18500000	18500000	1.79612	1.79612	0.844881	0.844881	4	TRUE	TRUE	TRUE	212	411	51.5815	Tpossible_mito	DBX|DDX14|DDX3|HLP2|O00571	ENSG00000215301
EIF4A1	Eukaryotic initiation factor 4A-I OS=Homo sapiens GN=EIF4A1 PE=1 SV=1	12	14	101	45000000	48000000	41000000	40000000	46000000	44000000	46500000	42750000	0.919355	-0.121306	0.171225	0.766433	45000000	40500000	0.967742	0.870968	-0.0473057	-0.199309	4	FALSE	TRUE	TRUE	190	411	46.2287	Tnon_mito	DDX2A|EIF-4A|EIF4A|eIF-4A-I|eIF4A-I|P60842	ENSG00000161960
ACSL3	Long-chain-fatty-acid--CoA ligase 3 OS=Homo sapiens GN=ACSL3 PE=1 SV=3	7	9	32	8800000	6000000	11000000	9100000	7200000	14000000	7400000	10325000	1.39527	0.480545	0.239673	0.62038	10600000	10050000	1.43243	1.35811	0.518467	0.441598	4	FALSE	TRUE	TRUE	48	411	11.6788	Tpossible_mito	ACS3|FACL3|PRO2194|O95573	ENSG00000123983
ACSL4	Long-chain-fatty-acid--CoA ligase 4 OS=Homo sapiens GN=ACSL4 PE=1 SV=2	15	17	56	11000000	14000000	16000000	19000000	15000000	21000000	12500000	17750000	1.42	0.505891	0.0895742	1.04782	18000000	17500000	1.44	1.4	0.526069	0.485427	4	FALSE	TRUE	TRUE	39	411	9.48905	Tmito	ACS4|FACL4|LACS4|MRX63|MRX68|O60488	ENSG00000068366
FARSA	Phenylalanine--tRNA ligase alpha subunit OS=Homo sapiens GN=FARSA PE=1 SV=3	1	1	6		3200000	3800000	4800000	4800000	5400000	1600000	4700000	2.9375	1.55459	0.293165	0.532888	5100000	4300000	3.1875	2.6875	1.67243	1.42626	4	FALSE	FALSE	TRUE	60	411	14.5985	Tnon_mito	CML33|FARSL|FARSLA|FRSA|PheHA|Q9Y285	ENSG00000179115
SEPT11	Septin-11 OS=Homo sapiens GN=SEPT11 PE=2 SV=1	3	4	28	6700000	4800000	8800000		9200000	7800000	5750000	6450000	1.12174	0.165737	0.78291	0.106288	8500000	4400000	1.47826	0.765217	0.563901	-0.386058	3	FALSE	TRUE	TRUE	60	411	14.5985	Tnon_mito	Q9NVA2	ENSG00000138758
PRPF19	Pre-mRNA-processing factor 19 OS=Homo sapiens GN=PRPF19 PE=1 SV=1	10	10	36	26000000	35000000	34000000	19000000	30000000	35000000	30500000	29500000	0.967213	-0.0480943	0.876578	0.0572095	32500000	26500000	1.06557	0.868852	0.0916305	-0.202817	4	FALSE	TRUE	TRUE	121	411	29.4404	Tnon_mito	NMP200|PRP19|PSO4|SNEV|UBOX4|hPSO4|Q9UMS4	ENSG00000110107
UBQLN1	Ubiquilin-1 OS=Homo sapiens GN=UBQLN1 PE=1 SV=2	1	2	7	3600000		8100000		10000000	8400000	1800000	6625000	3.68056	1.87992	0.176599	0.753012	9200000	4050000	5.11111	2.25	2.35364	1.16993	3	FALSE	FALSE	TRUE	10	411	2.43309	Tnon_mito	DA41|DSK2|PLIC-1|UBQN|XDRP1|Q9UMX0	ENSG00000135018
EIF3B	Isoform 2 of Eukaryotic translation initiation factor 3 subunit B OS=Homo sapiens GN=EIF3B	30	30	224	140000000	190000000	110000000	90000000	110000000	120000000	165000000	107500000	0.651515	-0.618129	0.24497	0.610887	115000000	100000000	0.69697	0.606061	-0.520832	-0.722466	4	FALSE	TRUE	TRUE	108	411	26.2774	Tnon_mito	EIF3-ETA|EIF3-P110|EIF3-P116|EIF3S9|PRT1|P55884	ENSG00000106263
RAB34	Ras-related protein Rab-34, isoform NARR OS=Homo sapiens GN=RAB34 PE=1 SV=1	2	2	7	11000000	11000000	9500000	10000000	10000000	11000000	11000000	10125000	0.920455	-0.119582	0.0689035	1.16176	10500000	9750000	0.954545	0.886364	-0.0671142	-0.174029	4	FALSE	FALSE	TRUE	2	411	0.486618	Tnon_mito	RAB39|RAH|Q9BZG1	ENSG00000109113
DHX9	ATP-dependent RNA helicase A OS=Homo sapiens GN=DHX9 PE=1 SV=4	11	11	43	15000000	12000000	14000000	12000000	16000000	12000000	13500000	13500000	1	0	1	0	14000000	13000000	1.03704	0.962963	0.0524674	-0.0544478	4	FALSE	TRUE	TRUE	205	411	49.8783	Tnon_mito	DDX9|LKP|NDH2|NDHII|RHA|Q08211	ENSG00000135829
MARK3	MAP/microtubule affinity-regulating kinase 3 OS=Homo sapiens GN=MARK3 PE=2 SV=1	2	2	8	7400000	8400000	12000000	7200000	8000000	5600000	7900000	8200000	1.03797	0.0537713	0.847103	0.072064	6800000	9600000	0.860759	1.21519	-0.216318	0.281182	4	FALSE	FALSE	TRUE	7	411	1.70316	Tnon_mito	CTAK1|KP78|PAR1A|Par-1a|P27448	ENSG00000075413
RANBP2	E3 SUMO-protein ligase RanBP2 OS=Homo sapiens GN=RANBP2 PE=1 SV=2	3	3	3					4200000	2600000	0	1700000	100	6.64386	0.198834	0.701509	3400000	0	100	100	6.64386	6.64386	2	FALSE	TRUE	FALSE	90	411	21.8978	Tpossible_mito	ADANE|ANE1|IIAE3|NUP358|TRP1|TRP2|P49792	ENSG00000153201
PUM1	Pumilio homolog 1 OS=Homo sapiens GN=PUM1 PE=4 SV=1	1	1	1			6700000				0	1675000	100	6.64386	0.391002	0.407821	0	3350000	0	100		6.64386	1	FALSE	FALSE	FALSE	24	411	5.83942	Tnon_mito	HSPUM|PUMH|PUMH1|PUML1|Q14671	ENSG00000134644
NAA15	N-alpha-acetyltransferase 15, NatA auxiliary subunit OS=Homo sapiens GN=NAA15 PE=1 SV=1	1	1	1				4300000			0	1075000	100	6.64386	0.391002	0.407821	0	2150000	0	100		6.64386	1	FALSE	FALSE	FALSE	32	411	7.78589	Tnon_mito	Ga19|NARG1|NAT1P|NATH|TBDN|TBDN100|Q9BXJ9	ENSG00000164134
NOP14	Nucleolar protein 14 OS=Homo sapiens GN=NOP14 PE=1 SV=3	5	5	10	6600000	8200000	6600000	6100000	10000000	5900000	7400000	7150000	0.966216	-0.049582	0.852558	0.069276	7950000	6350000	1.07432	0.858108	0.10343	-0.220769	4	FALSE	TRUE	TRUE	12	411	2.91971	Tpossible_mito	C4orf9|NOL14|RES425|UTP2|P78316	ENSG00000087269
LAMP2	Isoform LAMP-2C of Lysosome-associated membrane glycoprotein 2 OS=Homo sapiens GN=LAMP2	3	3	10	5300000	4800000	9800000	7600000	11000000	2800000	5050000	7800000	1.54455	0.627191	0.226034	0.645826	6900000	8700000	1.36634	1.72277	0.450313	0.784732	4	FALSE	TRUE	TRUE	4	411	0.973236	Tnon_mito	CD107b|LAMP-2|LAMPB|LGP110|P13473	ENSG00000005893
PGRMC1	Membrane-associated progesterone receptor component 1 OS=Homo sapiens GN=PGRMC1 PE=1 SV=3	5	6	27	17000000	17000000	27000000	25000000	28000000	27000000	17000000	26750000	1.57353	0.654004	0.000583786	3.23375	27500000	26000000	1.61765	1.52941	0.693897	0.612977	4	TRUE	TRUE	TRUE	40	411	9.73236	Tnon_mito	HPR6.6|MPR|O00264	ENSG00000101856
STIP1	Stress-induced-phosphoprotein 1 OS=Homo sapiens GN=STIP1 PE=1 SV=1	17	17	126	36000000	31000000	65000000	70000000	73000000	71000000	33500000	69750000	2.08209	1.05803	0.00690918	2.16057	72000000	67500000	2.14925	2.01493	1.10384	1.01073	4	TRUE	TRUE	TRUE	120	411	29.1971	Tnon_mito	HEL-S-94n|HOP|IEF-SSP-3521|P60|STI1|STI1L|P31948	ENSG00000168439
MATR3	Matrin-3 OS=Homo sapiens GN=MATR3 PE=4 SV=1	1	1	1		1700000					850000	0	0		0.5	0.30103	0	0	0	0			0	FALSE	FALSE	FALSE	171	411	41.6058	Tnon_mito	MPD2|VCPDM|P43243	ENSG00000015479
MGME1	Mitochondrial genome maintenance exonuclease 1 OS=Homo sapiens GN=MGME1 PE=1 SV=1	3	3	9			11000000	9000000	7900000	11000000	0	9725000	100	6.64386	0.00106881	2.9711	9450000	10000000	100	100	6.64386	6.64386	4	TRUE	TRUE	TRUE	2	411	0.486618	Tmito	C20orf72|DDK1|MTDPS11|bA504H3.4|Q9BQP7	ENSG00000125871
MYO1C	Unconventional myosin-Ic OS=Homo sapiens GN=MYO1C PE=1 SV=4	3	3	3	4400000	12000000			1600000		8200000	400000	0.0487805	-4.35755	0.285728	0.544047	800000	0	0.097561	0	-3.35755		1	FALSE	TRUE	FALSE	66	411	16.0584	Tnon_mito	MMI-beta|MMIb|NMI|myr2|O00159	ENSG00000197879
SEPT2	Isoform 2 of Septin-2 OS=Homo sapiens GN=SEPT2	6	6	18	5700000	6000000	8600000	7900000	7400000	9200000	5850000	8275000	1.41453	0.500323	0.00576059	2.23953	8300000	8250000	1.4188	1.41026	0.504675	0.495957	4	TRUE	TRUE	TRUE	88	411	21.4112	Tnon_mito	DIFF6|NEDD-5|NEDD5|Pnutl3|hNedd5|Q15019	ENSG00000168385
SEPT9	Septin-9 OS=Homo sapiens GN=SEPT9 PE=1 SV=2	5	5	17	4600000	6900000	10000000	10000000	8600000	9700000	5750000	9575000	1.66522	0.735711	0.163033	0.787723	9150000	10000000	1.5913	1.73913	0.67021	0.798366	4	FALSE	TRUE	TRUE	79	411	19.2214	Tnon_mito	AF17q25|MSF|MSF1|NAPB|PNUTL4|SINT1|SeptD1|Q9UHD8	ENSG00000184640
RPA3	Replication protein A 14 kDa subunit OS=Homo sapiens GN=RPA3 PE=1 SV=1	5	5	30	33000000	34000000	24000000	23000000	47000000	45000000	33500000	34750000	1.03731	0.0528519	0.860293	0.0653538	46000000	23500000	1.37313	0.701493	0.457473	-0.5115	4	FALSE	TRUE	TRUE	43	411	10.4623	Tnon_mito	REPA3|P35244	ENSG00000106399
PPM1B	Protein phosphatase 1B OS=Homo sapiens GN=PPM1B PE=1 SV=1	2	2	2			6600000			3200000	0	2450000	100	6.64386	0.217796	0.66195	1600000	3300000	100	100	6.64386	6.64386	2	FALSE	FALSE	FALSE	117	411	28.4672	Tnon_mito	PP2C-beta-X|PP2CB|PP2CBETA|PPC2BETAX|O75688	ENSG00000138032
TAB1	TGF-beta-activated kinase 1 and MAP3K7-binding protein 1 OS=Homo sapiens GN=TAB1 PE=1 SV=1	19	19	121	51000000	48000000	52000000	46000000	64000000	56000000	49500000	54500000	1.10101	0.138828	0.290062	0.537509	60000000	49000000	1.21212	0.989899	0.277534	-0.0146468	4	FALSE	TRUE	TRUE	45	411	10.9489	Tnon_mito	3'-Tab1|MAP3K7IP1|Q15750	ENSG00000100324
RUVBL2	RuvB-like 2 OS=Homo sapiens GN=RUVBL2 PE=1 SV=3	18	18	106	35000000	29000000	47000000	51000000	59000000	51000000	32000000	52000000	1.625	0.70044	0.0224953	1.64791	55000000	49000000	1.71875	1.53125	0.78136	0.61471	4	TRUE	TRUE	TRUE	141	411	34.3066	Tnon_mito	ECP51|INO80J|REPTIN|RVB2|TIH2|TIP48|TIP49B|Q9Y230	ENSG00000183207
SF3B2	Splicing factor 3B subunit 2 OS=Homo sapiens GN=SF3B2 PE=1 SV=2	16	16	69	48000000	45000000	39000000	33000000	40000000	40000000	46500000	38000000	0.817204	-0.291231	0.027087	1.56724	40000000	36000000	0.860215	0.774194	-0.217231	-0.369234	4	TRUE	TRUE	TRUE	134	411	32.6034	Tnon_mito	Cus1|SAP145|SF3B145|SF3b1|SF3b150|Q13435	ENSG00000087365
WDR82	WD repeat-containing protein 82 OS=Homo sapiens GN=WDR82 PE=1 SV=1	2	2	8	4700000	4300000	3200000	4200000	3500000	1500000	4500000	3100000	0.688889	-0.537657	0.0893663	1.04883	2500000	3700000	0.555556	0.822222	-0.847997	-0.2824	4	FALSE	FALSE	TRUE	42	411	10.219	Tnon_mito	MST107|MSTP107|PRO2730|PRO34047|SWD2|TMEM113|WDR82A|Q6UXN9	ENSG00000164091
OSBPL11	Oxysterol-binding protein-related protein 11 OS=Homo sapiens GN=OSBPL11 PE=1 SV=2	1	1	5	3800000	3600000	6300000		4500000	5700000	3700000	4125000	1.11486	0.156869	0.785312	0.104958	5100000	3150000	1.37838	0.851351	0.462972	-0.232173	3	FALSE	FALSE	TRUE	6	411	1.45985	Tnon_mito	ORP-11|ORP11|OSBP12|TCCCIA00292|Q9BXB4	ENSG00000144909
LARP4	Isoform 4 of La-related protein 4 OS=Homo sapiens GN=LARP4	1	1	2		5000000				5700000	2500000	1425000	0.57	-0.810966	0.750158	0.124847	2850000	0	1.14	0	0.189034		1	FALSE	FALSE	FALSE	34	411	8.27251	Tnon_mito	Q71RC2	ENSG00000161813
DNAJA1	DnaJ homolog subfamily A member 1 OS=Homo sapiens GN=DNAJA1 PE=1 SV=2	8	8	31	13000000	20000000	20000000	13000000	39000000	22000000	16500000	23500000	1.42424	0.510195	0.344641	0.462633	30500000	16500000	1.84848	1	0.886343	0	4	FALSE	TRUE	TRUE	115	411	27.9805	Tpossible_mito	DJ-2|DjA1|HDJ2|HSDJ|HSJ2|HSPF4|NEDD7|hDJ-2|P31689	ENSG00000086061
PSMC3	26S protease regulatory subunit 6A OS=Homo sapiens GN=PSMC3 PE=3 SV=1	12	12	78	16000000	15000000	30000000	25000000	34000000	37000000	15500000	31500000	2.03226	1.02308	0.00742537	2.12928	35500000	27500000	2.29032	1.77419	1.19555	0.827163	4	TRUE	TRUE	TRUE	113	411	27.4939	Tnon_mito	TBP1|P17980	ENSG00000165916
PSMD10	26S proteasome non-ATPase regulatory subunit 10 OS=Homo sapiens GN=PSMD10 PE=1 SV=1	5	5	22	13000000	11000000	27000000	23000000	32000000	28000000	12000000	27500000	2.29167	1.1964	0.00182222	2.7394	30000000	25000000	2.5	2.08333	1.32193	1.05889	4	TRUE	TRUE	TRUE	12	411	2.91971	Tnon_mito	dJ889N15.2|p28|p28(GANK)|O75832	ENSG00000101843
DDX21	Nucleolar RNA helicase 2 OS=Homo sapiens GN=DDX21 PE=1 SV=5	2	2	3		2700000			2700000		1350000	675000	0.5	-1	0.709843	0.148837	1350000	0	1	0	0		1	FALSE	FALSE	FALSE	179	411	43.5523	Tnon_mito	GUA|GURDB|RH-II/GU|RH-II/GuA|Q9NR30	ENSG00000165732
SPTLC2	Serine palmitoyltransferase 2 OS=Homo sapiens GN=SPTLC2 PE=1 SV=1	3	3	8			4900000	5900000	5400000	6300000	0	5625000	100	6.64386	0.000343799	3.46369	5850000	5400000	100	100	6.64386	6.64386	4	TRUE	TRUE	TRUE	1	411	0.243309	Tmito	HSN1C|LCB2|LCB2A|NSAN1C|SPT2|hLCB2a|O15270	ENSG00000100596
DNAJC10	DnaJ homolog subfamily C member 10 OS=Homo sapiens GN=DNAJC10 PE=1 SV=2	4	4	10	2900000	3800000	3700000	4000000	4400000	5900000	3350000	4500000	1.34328	0.425764	0.174808	0.757439	5150000	3850000	1.53731	1.14925	0.620411	0.200697	4	FALSE	TRUE	TRUE	26	411	6.32603	Tnon_mito	ERdj5|JPDI|MTHr|PDIA19|Q8IXB1	ENSG00000077232
ASNA1	ATPase ASNA1 OS=Homo sapiens GN=ASNA1 PE=1 SV=2	3	3	9		1700000	6600000	4800000	8600000	7400000	850000	6850000	8.05882	3.01057	0.0166636	1.77823	8000000	5700000	9.41176	6.70588	3.23447	2.74543	4	TRUE	TRUE	TRUE	11	411	2.6764	Tnon_mito	ARSA-I|ARSA1|ASNA-I|GET3|TRC40|hASNA-I|O43681	ENSG00000198356
PRPSAP1	Isoform 2 of Phosphoribosyl pyrophosphate synthase-associated protein 1 OS=Homo sapiens GN=PRPSAP1	7	8	37	4800000	13000000	9500000	5200000	12000000	8000000	8900000	8675000	0.974719	-0.0369416	0.96568	0.015167	10000000	7350000	1.1236	0.825843	0.168123	-0.276061	4	FALSE	TRUE	TRUE	59	411	14.3552	Tnon_mito	PAP39|Q14558	ENSG00000161542
SLC1A5	Neutral amino acid transporter B(0) OS=Homo sapiens GN=SLC1A5 PE=1 SV=2	1	1	3				3100000	3400000	3900000	0	2600000	100	6.64386	0.0601664	1.22065	3650000	1550000	100	100	6.64386	6.64386	3	FALSE	FALSE	FALSE	70	411	17.0316	Tnon_mito	AAAT|ASCT2|ATBO|M7V1|M7VS1|R16|RDRC|Q15758	ENSG00000105281
TPD52	Isoform 3 of Tumor protein D52 OS=Homo sapiens GN=TPD52	5	5	26	6900000	4600000	9900000	13000000	14000000	15000000	5750000	12975000	2.25652	1.1741	0.0219807	1.65796	14500000	11450000	2.52174	1.9913	1.33442	0.993714	4	TRUE	TRUE	TRUE	18	411	4.37956	Tnon_mito	D52|N8L|PC-1|PrLZ|hD52|P55327	ENSG00000076554
PDCD5	Programmed cell death protein 5 OS=Homo sapiens GN=PDCD5 PE=1 SV=3	3	3	14	5500000	6300000	11000000	13000000	13000000	11000000	5900000	12000000	2.0339	1.02425	0.00110136	2.95807	12000000	12000000	2.0339	2.0339	1.02425	1.02425	4	TRUE	TRUE	TRUE	68	411	16.545	Tnon_mito	TFAR19|O14737	ENSG00000105185
LAMTOR5	Ragulator complex protein LAMTOR5 OS=Homo sapiens GN=LAMTOR5 PE=1 SV=1	1	1	2			9500000	9800000			0	4825000	100	6.64386	0.181767	0.740485	0	9650000	0	100		6.64386	2	FALSE	FALSE	FALSE	1	411	0.243309	Tnon_mito	HBXIP|XIP|O43504	ENSG00000134248
TTC1	Tetratricopeptide repeat protein 1 OS=Homo sapiens GN=TTC1 PE=1 SV=1	6	6	23		8400000	17000000	11000000	22000000	16000000	4200000	16500000	3.92857	1.974	0.151878	0.818506	19000000	14000000	4.52381	3.33333	2.17754	1.73697	4	FALSE	TRUE	TRUE	1	411	0.243309	Tnon_mito	TPR1|Q99614	ENSG00000113312
RPL35	60S ribosomal protein L35 OS=Homo sapiens GN=RPL35 PE=1 SV=2	3	3	8	97000000	51000000			74000000	100000000	74000000	43500000	0.587838	-0.76651	0.435543	0.360969	87000000	0	1.17568	0	0.23349		2	FALSE	TRUE	TRUE	156	411	37.9562	Tnon_mito	L35|P42766	ENSG00000136942
CNP	2',3'-cyclic-nucleotide 3'-phosphodiesterase OS=Homo sapiens GN=CNP PE=1 SV=2	5	5	20	14000000	9400000	15000000	15000000	18000000	15000000	11700000	15750000	1.34615	0.428843	0.308075	0.511343	16500000	15000000	1.41026	1.28205	0.495957	0.358454	4	FALSE	TRUE	TRUE	26	411	6.32603	Tpossible_mito	CNP1|P09543	ENSG00000173786
GANAB	Neutral alpha-glucosidase AB OS=Homo sapiens GN=GANAB PE=1 SV=3	1	20	99		11000000	25000000	25000000	20000000	23000000	5500000	23250000	4.22727	2.07973	0.177973	0.749646	21500000	25000000	3.90909	4.54545	1.96683	2.18442	4	FALSE	FALSE	TRUE	105	411	25.5474	Tnon_mito	G2AN|GLUII|Q14697	ENSG00000089597
GANAB	Isoform 2 of Neutral alpha-glucosidase AB OS=Homo sapiens GN=GANAB	2	21	102	7800000	9900000	14000000	21000000	22000000	20000000	8850000	19250000	2.17514	1.12111	0.00750871	2.12443	21000000	17500000	2.37288	1.9774	1.24664	0.983606	4	TRUE	FALSE	TRUE	105	411	25.5474	Tnon_mito	G2AN|GLUII|Q14697	ENSG00000089597
ASPH	Aspartyl/asparaginyl beta-hydroxylase OS=Homo sapiens GN=ASPH PE=1 SV=3	1	1	6	5900000	5700000	10000000	8700000	13000000	11000000	5800000	10675000	1.84052	0.880111	0.0120591	1.91868	12000000	9350000	2.06897	1.61207	1.04891	0.688913	4	TRUE	FALSE	TRUE	14	411	3.40633	Tnon_mito	AAH|BAH|CASQ2BP1|HAAH|JCTN|junctin|Q12797	ENSG00000198363
KRT1	SWISS-PROT:P04264 Tax_Id=9606 Gene_Symbol=KRT1 Keratin, type II cytoskeletal 1	30	35	671	1500000000	1500000000	720000000	650000000	1000000000	1100000000	1500000000	867500000	0.578333	-0.790027	0.00999598	2.00017	1050000000	685000000	0.7	0.456667	-0.514573	-1.13079	4	TRUE	TRUE	TRUE	386	411	93.9173	Tnon_mito	CK1|EHK|EHK1|EPPK|K1|KRT1A|NEPPK|P04264	ENSG00000167768
EIF3L	Eukaryotic translation initiation factor 3 subunit L OS=Homo sapiens GN=EIF3L PE=2 SV=1	22	22	169	86000000	75000000	70000000	58000000	73000000	68000000	80500000	67250000	0.835404	-0.259455	0.191753	0.717258	70500000	64000000	0.875776	0.795031	-0.191366	-0.330917	4	FALSE	TRUE	TRUE	92	411	22.3844	Tnon_mito	EIF3EIP|EIF3S11|EIF3S6IP|HSPC021|HSPC025|MSTP005|Q9Y262	ENSG00000100129
PCBP1	Poly(rC)-binding protein 1 OS=Homo sapiens GN=PCBP1 PE=1 SV=2	5	9	38	11000000	11000000	18000000	18000000	16000000	19000000	11000000	17750000	1.61364	0.690316	0.00173145	2.76159	17500000	18000000	1.59091	1.63636	0.669851	0.710493	4	TRUE	TRUE	TRUE	194	411	47.2019	Tnon_mito	HEL-S-85|HNRPE1|HNRPX|hnRNP-E1|hnRNP-X|Q15365	ENSG00000169564
PLEC	Plectin OS=Homo sapiens GN=PLEC PE=1 SV=3	2	2	11	1400000000	380000000	410000000	500000000	110000000		890000000	255000000	0.286517	-1.80331	0.42327	0.373382	55000000	455000000	0.0617978	0.511236	-4.0163	-0.967939	3	FALSE	FALSE	TRUE	109	411	26.5207	Tnon_mito	EBS1|EBSO|HD1|LGMD2Q|PCN|PLEC1|PLEC1b|PLTN|Q15149	ENSG00000178209
SPTBN1	Spectrin beta chain, non-erythrocytic 1 OS=Homo sapiens GN=SPTBN1 PE=1 SV=2	30	31	98	19000000	16000000	22000000	13000000	20000000	14000000	17500000	17250000	0.985714	-0.0207586	0.930082	0.0314788	17000000	17500000	0.971429	1	-0.0418202	0	4	FALSE	TRUE	TRUE	143	411	34.7932	Tnon_mito	ELF|HEL102|SPTB2|betaSpII|Q01082	ENSG00000115306
GNB2L1	Guanine nucleotide-binding protein subunit beta-2-like 1 OS=Homo sapiens GN=GNB2L1 PE=2 SV=1	1	7	79					9000000	10000000	0	4750000	100	6.64386	0.182571	0.738569	9500000	0	100	100	6.64386	6.64386	2	FALSE	FALSE	TRUE	135	411	32.8467	Tpossible_mito	Gnb2-rs1|H12.3|HLC-7|PIG21|RACK1|P63244	ENSG00000204628
GNB2L1	Guanine nucleotide-binding protein subunit beta-2-like 1 OS=Homo sapiens GN=GNB2L1 PE=1 SV=3	12	18	239	240000000	240000000	200000000	200000000	240000000	230000000	240000000	217500000	0.90625	-0.142019	0.117039	0.931669	235000000	200000000	0.979167	0.833333	-0.0303736	-0.263034	4	FALSE	TRUE	TRUE	135	411	32.8467	Tpossible_mito	Gnb2-rs1|H12.3|HLC-7|PIG21|RACK1|P63244	ENSG00000204628
LRRC59	Leucine-rich repeat-containing protein 59 OS=Homo sapiens GN=LRRC59 PE=1 SV=1	8	8	49	33000000	35000000	50000000	55000000	60000000	72000000	34000000	59250000	1.74265	0.80128	0.0109919	1.95893	66000000	52500000	1.94118	1.54412	0.956931	0.626783	4	TRUE	TRUE	TRUE	80	411	19.4647	Tpossible_mito	p34|Q96AG4	ENSG00000108829
MYH9	Myosin-9 OS=Homo sapiens GN=MYH9 PE=1 SV=4	25	29	111	5400000	7600000	25000000	26000000	28000000	25000000	6500000	26000000	4	2	0.00561573	2.25059	26500000	25500000	4.07692	3.92308	2.02748	1.97199	4	TRUE	TRUE	TRUE	203	411	49.3917	Tnon_mito	BDPLT6|DFNA17|EPSTS|FTNS|MHA|NMHC-II-A|NMMHC-IIA|NMMHCA|P35579	ENSG00000100345
RAP1B	Ras-related protein Rap-1b OS=Homo sapiens GN=RAP1B PE=1 SV=1	5	5	52	48000000	53000000	38000000	40000000	38000000	43000000	50500000	39750000	0.787129	-0.345329	0.0960665	1.01743	40500000	39000000	0.80198	0.772277	-0.318361	-0.372809	4	FALSE	TRUE	TRUE	48	411	11.6788	Tnon_mito	K-REV|RAL1B|P61224	ENSG00000127314
RPL12	60S ribosomal protein L12 OS=Homo sapiens GN=RPL12 PE=1 SV=1	6	6	45	56000000	50000000	41000000	41000000	58000000	54000000	53000000	48500000	0.915094	-0.128008	0.447161	0.349536	56000000	41000000	1.0566	0.773585	0.0794345	-0.370368	4	FALSE	TRUE	TRUE	201	411	48.9051	Tnon_mito	L12|P30050	ENSG00000197958
ARL8B	ADP-ribosylation factor-like protein 8B OS=Homo sapiens GN=ARL8B PE=1 SV=1	3	3	11	8800000	8900000	18000000	12000000	8200000	9500000	8850000	11925000	1.34746	0.43024	0.252005	0.59859	8850000	15000000	1	1.69492	0	0.761213	4	FALSE	TRUE	TRUE	10	411	2.43309	Tnon_mito	ARL10C|Gie1|Q9NVJ2	ENSG00000134108
PSAP	Saposin-D OS=Homo sapiens GN=PSAP PE=4 SV=1	5	5	20	10000000	16000000	27000000	22000000	14000000	24000000	13000000	21750000	1.67308	0.742504	0.129282	0.888463	19000000	24500000	1.46154	1.88462	0.547488	0.91427	4	FALSE	TRUE	TRUE	5	411	1.21655	Tpossible_mito	GLBA|SAP1|P07602	ENSG00000197746
ATP1A1	Sodium/potassium-transporting ATPase subunit alpha-1 OS=Homo sapiens GN=ATP1A1 PE=1 SV=1	14	14	58	9000000	6800000	21000000	17000000	19000000	22000000	7900000	19750000	2.5	1.32193	0.00462176	2.33519	20500000	19000000	2.59494	2.40506	1.3757	1.26607	4	TRUE	TRUE	TRUE	45	411	10.9489	Tpossible_mito	P05023	ENSG00000163399
PABPN1	Polyadenylate-binding protein 2 OS=Homo sapiens GN=PABPN1 PE=1 SV=3	5	5	41	24000000	36000000	16000000	16000000	19000000	24000000	30000000	18750000	0.625	-0.678072	0.291207	0.535797	21500000	16000000	0.716667	0.533333	-0.480626	-0.906891	4	FALSE	TRUE	TRUE	50	411	12.1655	Tnon_mito	OPMD|PAB2|PABII|PABP-2|PABP2|Q86U42	ENSG00000100836
ACTN4	Alpha-actinin-4 OS=Homo sapiens GN=ACTN4 PE=1 SV=2	6	6	18	5100000	6000000	5200000	7100000	8400000	6700000	5550000	6850000	1.23423	0.303616	0.180346	0.743894	7550000	6150000	1.36036	1.10811	0.443989	0.148099	4	FALSE	TRUE	TRUE	141	411	34.3066	Tnon_mito	ACTININ-4|FSGS|FSGS1|O43707	ENSG00000130402
CDC42	Cell division control protein 42 homolog OS=Homo sapiens GN=CDC42 PE=2 SV=1	2	2	23	14000000	20000000	20000000	16000000	20000000	20000000	17000000	19000000	1.11765	0.160465	0.6242	0.204676	20000000	18000000	1.17647	1.05882	0.234465	0.0824622	4	FALSE	FALSE	TRUE	80	411	19.4647	Tnon_mito	CDC42Hs|G25K|P60953	ENSG00000070831
DYNC1H1	Cytoplasmic dynein 1 heavy chain 1 OS=Homo sapiens GN=DYNC1H1 PE=1 SV=5	38	38	91	2600000	5600000	15000000	13000000	24000000	13000000	4100000	16250000	3.96341	1.98674	0.0158989	1.79863	18500000	14000000	4.5122	3.41463	2.17383	1.77173	4	TRUE	TRUE	TRUE	131	411	31.8735	Tnon_mito	DHC1|DHC1a|DNCH1|DNCL|DNECL|DYHC|Dnchc1|HL-3|SMALED1|p22|Q14204	ENSG00000197102
EPHX1	Epoxide hydrolase 1 OS=Homo sapiens GN=EPHX1 PE=1 SV=1	7	7	29	11000000	9400000	13000000	18000000	15000000	16000000	10200000	15500000	1.51961	0.603699	0.0181682	1.74069	15500000	15500000	1.51961	1.51961	0.603699	0.603699	4	TRUE	TRUE	TRUE	6	411	1.45985	Tnon_mito	EPHX|EPOX|HYL1|MEH|P07099	ENSG00000143819
GNB2	Guanine nucleotide-binding protein G(I)/G(S)/G(T) subunit beta-2 OS=Homo sapiens GN=GNB2 PE=1 SV=3	1	3	12			7800000	6200000			0	3500000	100	6.64386	0.185821	0.730906	0	7000000	0	100		6.64386	2	FALSE	FALSE	TRUE	63	411	15.3285	Tnon_mito	P62879	ENSG00000172354
MYL6	Myosin light polypeptide 6 OS=Homo sapiens GN=MYL6 PE=4 SV=1	6	6	50	30000000	25000000	44000000	37000000	55000000	47000000	27500000	45750000	1.66364	0.73434	0.015873	1.79934	51000000	40500000	1.85455	1.47273	0.891066	0.55849	4	TRUE	TRUE	TRUE	190	411	46.2287	Tnon_mito	ESMLC|LC17|LC17-GI|LC17-NM|LC17A|LC17B|MLC-3|MLC1SM|MLC3NM|MLC3SM|P60660	ENSG00000092841
PPIB	Peptidyl-prolyl cis-trans isomerase B OS=Homo sapiens GN=PPIB PE=1 SV=2	3	3	10	16000000	13000000	14000000	10000000	14000000	10000000	14500000	12000000	0.827586	-0.273018	0.303964	0.517178	12000000	12000000	0.827586	0.827586	-0.273018	-0.273018	4	FALSE	TRUE	TRUE	119	411	28.9538	Tnon_mito	CYP-S1|CYPB|HEL-S-39|OI9|SCYLP|P23284	ENSG00000166794
RAB6A	Ras-related protein Rab-6A OS=Homo sapiens GN=RAB6A PE=1 SV=3	1	2	24			15000000	12000000	12000000	13000000	0	13000000	100	6.64386	0.000351147	3.45451	12500000	13500000	100	100	6.64386	6.64386	4	TRUE	FALSE	TRUE	41	411	9.97567	Tnon_mito	RAB6|P20340	ENSG00000175582
RAC1	Isoform B of Ras-related C3 botulinum toxin substrate 1 OS=Homo sapiens GN=RAC1	2	2	4		8900000		5600000	7500000	5800000	4450000	4725000	1.0618	0.086509	0.96145	0.0170731	6650000	2800000	1.49438	0.629213	0.579549	-0.668379	3	FALSE	FALSE	FALSE	15	411	3.64964	Tnon_mito	Rac-1|TC-25|p21-Rac1|P63000	ENSG00000136238
RALA	Ras-related protein Ral-A OS=Homo sapiens GN=RALA PE=1 SV=1	2	2	8	6900000	4700000		8500000	8600000	9000000	5800000	6525000	1.125	0.169925	0.781298	0.107183	8800000	4250000	1.51724	0.732759	0.601451	-0.44859	3	FALSE	FALSE	TRUE	14	411	3.40633	Tnon_mito	RAL|P11233	ENSG00000006451
RPL7	60S ribosomal protein L7 OS=Homo sapiens GN=RPL7 PE=1 SV=1	5	5	17	8300000	8900000	12000000	12000000	11000000	15000000	8600000	12500000	1.45349	0.53952	0.0163081	1.7876	13000000	12000000	1.51163	1.39535	0.596103	0.480626	4	TRUE	TRUE	TRUE	175	411	42.5791	Tnon_mito	L7|humL7-1|P18124	ENSG00000147604
RPL27	60S ribosomal protein L27 OS=Homo sapiens GN=RPL27 PE=1 SV=2	2	2	8	22000000	20000000	13000000	15000000	16000000	16000000	21000000	15000000	0.714286	-0.485427	0.0363577	1.4394	16000000	14000000	0.761905	0.666667	-0.392317	-0.584963	4	TRUE	FALSE	TRUE	159	411	38.6861	Tnon_mito	L27|P61353	ENSG00000131469
RPLP0	60S acidic ribosomal protein P0 OS=Homo sapiens GN=RPLP0 PE=1 SV=1	7	7	60	28000000	25000000	24000000	28000000	32000000	32000000	26500000	29000000	1.09434	0.130061	0.36699	0.435346	32000000	26000000	1.20755	0.981132	0.27208	-0.0274807	4	FALSE	TRUE	TRUE	206	411	50.1217	Tnon_mito	L10E|LP0|P0|PRLP0|RPP0|P05388	ENSG00000089157
RPS4X	40S ribosomal protein S4, X isoform OS=Homo sapiens GN=RPS4X PE=1 SV=2	13	13	113	100000000	81000000	80000000	70000000	90000000	92000000	90500000	83000000	0.917127	-0.124806	0.572969	0.241869	91000000	75000000	1.00552	0.828729	0.00794875	-0.271027	4	FALSE	TRUE	TRUE	225	411	54.7445	Tnon_mito	CCG2|DXS306|RPS4|S4|SCAR|SCR10|P62701	ENSG00000198034
SLC3A2	Isoform 4 of 4F2 cell-surface antigen heavy chain OS=Homo sapiens GN=SLC3A2	1	1	2					3300000	3400000	0	1675000	100	6.64386	0.181761	0.740499	3350000	0	100	0	6.64386		2	FALSE	FALSE	FALSE	58	411	14.1119	Tnon_mito	4F2|4F2HC|4T2HC|CD98|CD98HC|MDU1|NACAE|P08195	ENSG00000168003
SPTAN1	Isoform 3 of Spectrin alpha chain, non-erythrocytic 1 OS=Homo sapiens GN=SPTAN1	74	74	318	32000000	34000000	26000000	25000000	27000000	28000000	33000000	26500000	0.80303	-0.316474	0.0358013	1.4461	27500000	25500000	0.833333	0.772727	-0.263034	-0.371969	4	TRUE	TRUE	TRUE	161	411	39.1727	Tnon_mito	EIEE5|NEAS|SPTA2|Q13813	ENSG00000197694
DYNLL1	Dynein light chain 1, cytoplasmic OS=Homo sapiens GN=DYNLL1 PE=1 SV=1	3	3	35	54000000	36000000	51000000	40000000	51000000	56000000	45000000	49500000	1.1	0.137504	0.706372	0.150967	53500000	45500000	1.18889	1.01111	0.249614	0.0159415	4	FALSE	TRUE	TRUE	64	411	15.5718	Tpossible_mito	DLC1|DLC8|DNCL1|DNCLC1|LC8|LC8a|PIN|hdlc1|P63167	ENSG00000088986
FARSB	Phenylalanine--tRNA ligase beta subunit OS=Homo sapiens GN=FARSB PE=1 SV=3	1	1	2			5800000		6800000		0	3150000	100	6.64386	0.183689	0.735917	3400000	2900000	100	100	6.64386	6.64386	2	FALSE	FALSE	FALSE	39	411	9.48905	Tnon_mito	FARSLB|FRSB|PheHB|PheRS|Q9NSD9	ENSG00000116120
KRT6B	SWISS-PROT:P04259 Tax_Id=9606 Gene_Symbol=KRT6B Keratin, type II cytoskeletal 6B	2	25	185	6800000	5900000				5900000	6350000	1475000	0.232283	-2.10604	0.0411995	1.38511	2950000	0	0.464567	0	-1.10604		1	TRUE	FALSE	TRUE	319	411	77.6156	Tnon_mito	CK-6B|CK6B|K6B|KRTL1|PC2|P04259	ENSG00000185479
KRT78	TREMBL:Q7RTT2 Tax_Id=9606 Gene_Symbol=KRT78 Keratin-78	4	6	21	6600000	5200000		2000000	3300000	3300000	5900000	2150000	0.364407	-1.45638	0.0316543	1.49957	3300000	1000000	0.559322	0.169492	-0.838249	-2.56071	3	TRUE	TRUE	TRUE	82	411	19.9513	Tnon_mito	K5B|Kb40|Q8N1N4	ENSG00000170423
TRIM28	Transcription intermediary factor 1-beta OS=Homo sapiens GN=TRIM28 PE=1 SV=5	13	13	62	24000000	17000000	29000000	32000000	36000000	34000000	20500000	32750000	1.59756	0.675871	0.133876	0.873297	35000000	30500000	1.70732	1.4878	0.771731	0.573185	4	FALSE	TRUE	TRUE	177	411	43.0657	Tnon_mito	KAP1|RNF96|TF1B|TIF1B|Q13263	ENSG00000130726
CSTF2	Cleavage stimulation factor subunit 2 OS=Homo sapiens GN=CSTF2 PE=2 SV=1	1	1	5	3100000	2300000	3900000		4900000	6000000	2700000	3700000	1.37037	0.454566	0.51004	0.292396	5450000	1950000	2.01852	0.722222	1.0133	-0.469485	3	FALSE	FALSE	TRUE	60	411	14.5985	Tnon_mito	CstF-64|P33240	ENSG00000101811
ILF3	Isoform 7 of Interleukin enhancer-binding factor 3 OS=Homo sapiens GN=ILF3	18	18	113	47000000	44000000	44000000	42000000	51000000	43000000	45500000	45000000	0.989011	-0.0159415	0.853643	0.0687236	47000000	43000000	1.03297	0.945055	0.0467942	-0.0815299	4	FALSE	TRUE	TRUE	158	411	38.4428	Tpossible_mito	CBTF|DRBF|DRBP76|MMP4|MPHOSPH4|MPP4|NF-AT-90|NF110|NF110b|NF90|NF90a|NF90b|NFAR|NFAR-1|NFAR2|TCP110|TCP80|Q12906	ENSG00000129351
PLS3	Plastin-3 OS=Homo sapiens GN=PLS3 PE=1 SV=4	1	1	1				2800000			0	700000	100	6.64386	0.391002	0.407821	0	1400000	0	100		6.64386	1	FALSE	FALSE	FALSE	41	411	9.97567	Tnon_mito	BMND18|T-plastin|P13797	ENSG00000102024
PI4K2A	Phosphatidylinositol 4-kinase type 2-alpha OS=Homo sapiens GN=PI4K2A PE=1 SV=1	1	1	1				1600000			0	400000	100	6.64386	0.391002	0.407821	0	800000	0	100		6.64386	1	FALSE	FALSE	FALSE	0	411	0	Tpossible_mito	PI4KII|PIK42A|RP11-548K23.6|Q9BTU6	ENSG00000155252
ARPC3	Actin-related protein 2/3 complex subunit 3 OS=Homo sapiens GN=ARPC3 PE=1 SV=3	2	2	5	9900000	7400000		8300000		2400000	8650000	2675000	0.309249	-1.69316	0.0623722	1.20501	1200000	4150000	0.138728	0.479769	-2.84967	-1.05959	2	FALSE	FALSE	TRUE	15	411	3.64964	Tnon_mito	ARC21|p21-Arc|O15145	ENSG00000111229
UHRF1BP1	UHRF1-binding protein 1 OS=Homo sapiens GN=UHRF1BP1 PE=1 SV=1	1	1	3			5100000	4600000		5700000	0	3850000	100	6.64386	0.0597843	1.22341	2850000	4850000	100	100	6.64386	6.64386	3	FALSE	FALSE	FALSE	2	411	0.486618	Tpossible_mito	C6orf107|ICBP90|dJ349A12.1|Q6BDS2	ENSG00000065060
DDX6	Probable ATP-dependent RNA helicase DDX6 OS=Homo sapiens GN=DDX6 PE=1 SV=2	18	18	120	130000000	140000000	76000000	83000000	75000000	88000000	135000000	80500000	0.596296	-0.745899	0.0155183	1.80915	81500000	79500000	0.603704	0.588889	-0.728087	-0.763933	4	TRUE	TRUE	TRUE	129	411	31.3869	Tnon_mito	HLR2|P54|RCK|P26196	ENSG00000110367
DKC1	H/ACA ribonucleoprotein complex subunit 4 OS=Homo sapiens GN=DKC1 PE=1 SV=3	1	1	6	4000000	3800000	4300000	3200000	4400000	4700000	3900000	4150000	1.0641	0.0896372	0.511666	0.291014	4550000	3750000	1.16667	0.961538	0.222392	-0.0565835	4	FALSE	FALSE	TRUE	74	411	18.0049	Tnon_mito	CBF5|DKC|DKCX|NAP57|NOLA4|XAP101|O60832	ENSG00000130826
EIF2S3	Eukaryotic translation initiation factor 2 subunit 3 OS=Homo sapiens GN=EIF2S3 PE=1 SV=3	16	16	96	49000000	42000000	44000000	40000000	53000000	48000000	45500000	46250000	1.01648	0.0235868	0.880112	0.0554623	50500000	42000000	1.10989	0.923077	0.150417	-0.115477	4	FALSE	TRUE	TRUE	91	411	22.1411	Tnon_mito	EIF2|EIF2G|EIF2gamma|eIF-2gA|P41091	ENSG00000130741
DRG1	Developmentally-regulated GTP-binding protein 1 OS=Homo sapiens GN=DRG1 PE=1 SV=1	5	5	22	8100000	7800000	5800000	5400000	6400000	7000000	7950000	6150000	0.773585	-0.370368	0.0102245	1.99036	6700000	5600000	0.842767	0.704403	-0.246794	-0.505528	4	TRUE	TRUE	TRUE	53	411	12.8954	Tnon_mito	NEDD3|Q9Y295	ENSG00000185721
EXOSC9	Isoform 2 of Exosome complex component RRP45 OS=Homo sapiens GN=EXOSC9	1	1	1					4800000		0	1200000	100	6.64386	0.391002	0.407821	2400000	0	100	0	6.64386		1	FALSE	FALSE	FALSE	62	411	15.0852	Tnon_mito	PM/Scl-75|PMSCL1|RRP45|Rrp45p|p5|p6|Q06265	ENSG00000123737
PSMC1	26S protease regulatory subunit 4 OS=Homo sapiens GN=PSMC1 PE=1 SV=1	9	10	69	22000000	26000000	59000000	44000000	56000000	53000000	24000000	53000000	2.20833	1.14296	0.00161871	2.79083	54500000	51500000	2.27083	2.14583	1.18322	1.10154	4	TRUE	TRUE	TRUE	95	411	23.1144	Tnon_mito	P26S4|S4|p56|P62191	ENSG00000100764
PSMC2	26S protease regulatory subunit 7 OS=Homo sapiens GN=PSMC2 PE=1 SV=3	15	15	73	18000000	13000000	30000000	34000000	58000000	40000000	15500000	40500000	2.6129	1.38565	0.0223368	1.65098	49000000	32000000	3.16129	2.06452	1.66051	1.0458	4	TRUE	TRUE	TRUE	126	411	30.6569	Tpossible_mito	MSS1|Nbla10058|S7|P35998	ENSG00000161057
PSMC5	26S protease regulatory subunit 8 OS=Homo sapiens GN=PSMC5 PE=1 SV=1	14	15	105	17000000	23000000	35000000	31000000	36000000	40000000	20000000	35500000	1.775	0.827819	0.0569755	1.24431	38000000	33000000	1.9	1.65	0.925999	0.722466	4	FALSE	TRUE	TRUE	116	411	28.2238	Tnon_mito	S8|SUG-1|SUG1|TBP10|TRIP1|p45|p45/SUG|P62195	ENSG00000087191
RFC2	Replication factor C subunit 2 OS=Homo sapiens GN=RFC2 PE=1 SV=3	2	2	7	11000000	8300000	15000000	11000000	13000000	9700000	9650000	12175000	1.26166	0.335321	0.265696	0.575614	11350000	13000000	1.17617	1.34715	0.234091	0.429911	4	FALSE	FALSE	TRUE	56	411	13.6253	Tnon_mito	RFC40|P35250	ENSG00000049541
RFC3	Replication factor C subunit 3 OS=Homo sapiens GN=RFC3 PE=1 SV=2	1	1	3			3600000	4000000		4000000	0	2900000	100	6.64386	0.0583244	1.23415	2000000	3800000	100	100	6.64386	6.64386	3	FALSE	FALSE	FALSE	37	411	9.00243	Tnon_mito	RFC38|P40938	ENSG00000133119
RFC4	Replication factor C subunit 4 OS=Homo sapiens GN=RFC4 PE=1 SV=2	6	6	18	13000000	8800000	8600000	6600000	5100000	8600000	10900000	7225000	0.662844	-0.593259	0.301897	0.520141	6850000	7600000	0.62844	0.697248	-0.670152	-0.520257	4	FALSE	TRUE	TRUE	58	411	14.1119	Tnon_mito	A1|RFC37|P35249	ENSG00000163918
SCD	Acyl-CoA desaturase OS=Homo sapiens GN=SCD PE=1 SV=2	2	2	6	5600000		14000000	13000000	16000000	15000000	2800000	14500000	5.17857	2.37255	0.134375	0.871683	15500000	13500000	5.53571	4.82143	2.46877	2.26946	4	FALSE	FALSE	TRUE	6	411	1.45985	Tnon_mito	FADS5|MSTP008|SCD1|SCDOS|O00767	ENSG00000099194
RUVBL1	RuvB-like 1 OS=Homo sapiens GN=RUVBL1 PE=1 SV=1	17	17	144	31000000	35000000	44000000	41000000	51000000	54000000	33000000	47500000	1.43939	0.525461	0.0165409	1.78144	52500000	42500000	1.59091	1.28788	0.669851	0.364997	4	TRUE	TRUE	TRUE	152	411	36.983	Tnon_mito	ECP54|INO80H|NMP238|PONTIN|Pontin52|RVB1|TIH1|TIP49|TIP49A|Q9Y265	ENSG00000175792
TRIP13	Pachytene checkpoint protein 2 homolog OS=Homo sapiens GN=TRIP13 PE=1 SV=2	2	2	6			5700000	8100000	6600000	9500000	0	7475000	100	6.64386	0.00296211	2.5284	8050000	6900000	100	100	6.64386	6.64386	4	TRUE	FALSE	TRUE	27	411	6.56934	Tnon_mito	16E1BP|Q15645	ENSG00000071539
EIF4A3	Eukaryotic initiation factor 4A-III OS=Homo sapiens GN=EIF4A3 PE=1 SV=4	1	3	11	3500000						1750000	0	0		0.5	0.30103	0	0	0	0			0	FALSE	FALSE	TRUE	147	411	35.7664	Tnon_mito	DDX48|MUK34|NMP265|NUK34|eIF4AIII|P38919	ENSG00000141543
SPTLC1	Serine palmitoyltransferase 1 OS=Homo sapiens GN=SPTLC1 PE=1 SV=1	4	4	21	14000000	18000000	17000000	16000000	19000000	17000000	16000000	17250000	1.07812	0.108524	0.643514	0.191442	18000000	16500000	1.125	1.03125	0.169925	0.0443941	4	FALSE	TRUE	TRUE	12	411	2.91971	Tnon_mito	HSAN1|HSN1|LBC1|LCB1|SPT1|SPTI|O15269	ENSG00000090054
DDX20	Probable ATP-dependent RNA helicase DDX20 OS=Homo sapiens GN=DDX20 PE=1 SV=2	3	3	8	4800000	7200000		10000000	12000000	9100000	6000000	7775000	1.29583	0.37388	0.577123	0.238732	10550000	5000000	1.75833	0.833333	0.814209	-0.263034	3	FALSE	TRUE	TRUE	40	411	9.73236	Tnon_mito	DP103|GEMIN3|Q9UHI6	ENSG00000064703
EXOSC8	Exosome complex component RRP43 OS=Homo sapiens GN=EXOSC8 PE=1 SV=1	3	3	7	12000000	8100000	10000000	8500000	12000000	4700000	10050000	8800000	0.875622	-0.19162	0.658604	0.181375	8350000	9250000	0.830846	0.920398	-0.267347	-0.11967	4	FALSE	TRUE	TRUE	43	411	10.4623	Tnon_mito	CIP3|EAP2|OIP2|RP11-421P11.3|RRP43|Rrp43p|bA421P11.3|p9|Q96B26	ENSG00000120699
DNAJC8	DnaJ homolog subfamily C member 8 OS=Homo sapiens GN=DNAJC8 PE=1 SV=2	1	1	2	4000000	3800000					3900000	0	0		0.01632	1.78728	0	0	0	0			0	TRUE	FALSE	FALSE	51	411	12.4088	Tnon_mito	HSPC331|SPF31|O75937	ENSG00000126698
EXOSC5	Exosome complex component RRP46 OS=Homo sapiens GN=EXOSC5 PE=1 SV=1	1	1	2		8900000				6300000	4450000	1575000	0.353933	-1.49845	0.633836	0.198023	3150000	0	0.707865	0	-0.498454		1	FALSE	FALSE	FALSE	17	411	4.13625	Tnon_mito	RRP41B|RRP46|Rrp46p|hRrp46p|p12B|Q9NQT4	ENSG00000077348
TNKS2	Tankyrase-2 OS=Homo sapiens GN=TNKS2 PE=1 SV=1	1	1	3			61000000		50000000		0	27750000	100	6.64386	0.184801	0.733296	25000000	30500000	100	100	6.64386	6.64386	2	FALSE	FALSE	FALSE	4	411	0.973236	Tnon_mito	ARTD6|PARP-5b|PARP-5c|PARP5B|PARP5C|TANK2|TNKL|pART6|Q9H2K2	ENSG00000107854
TMX1	Thioredoxin-related transmembrane protein 1 OS=Homo sapiens GN=TMX1 PE=1 SV=1	9	9	55	25000000	23000000	59000000	52000000	57000000	60000000	24000000	57000000	2.375	1.24793	8.59532e-05	4.06574	58500000	55500000	2.4375	2.3125	1.2854	1.20945	4	TRUE	TRUE	TRUE	23	411	5.59611	Tnon_mito	PDIA11|TMX|TXNDC|TXNDC1|Q9H3N1	ENSG00000139921
IGF2R	Cation-independent mannose-6-phosphate receptor OS=Homo sapiens GN=IGF2R PE=1 SV=3	4	4	6			3600000	3400000	3800000	3400000	0	3550000	100	6.64386	4.31486e-05	4.36503	3600000	3500000	100	100	6.64386	6.64386	4	TRUE	TRUE	TRUE	20	411	4.86618	Tnon_mito	CD222|CIMPR|M6P-R|MPR1|MPRI|P11717	ENSG00000197081
KRT17	SWISS-PROT:Q04695 Tax_Id=9606 Gene_Symbol=KRT17 Keratin, type I cytoskeletal 17	6	14	114	26000000	22000000	3600000	5300000	3100000	2600000	24000000	3650000	0.152083	-2.71707	0.0453435	1.34349	2850000	4450000	0.11875	0.185417	-3.074	-2.43116	4	TRUE	TRUE	TRUE	248	411	60.3406	Tnon_mito	K17|PC|PC2|PCHC1|Q04695	ENSG00000128422
TRAPPC3	Trafficking protein particle complex subunit 3 OS=Homo sapiens GN=TRAPPC3 PE=1 SV=1	2	2	5			7700000	7500000	8700000	8100000	0	8000000	100	6.64386	7.94585e-05	4.09986	8400000	7600000	100	100	6.64386	6.64386	4	TRUE	FALSE	TRUE	10	411	2.43309	Tnon_mito	BET3|O43617	ENSG00000054116
BNIP1	Vesicle transport protein SEC20 OS=Homo sapiens GN=BNIP1 PE=1 SV=3	2	2	2					5000000	6800000	0	2950000	100	6.64386	0.189011	0.723512	5900000	0	100	0	6.64386		2	FALSE	FALSE	FALSE	1	411	0.243309	Tpossible_mito	NIP1|SEC20|TRG-8|Q12981	ENSG00000113734
STAU1	Double-stranded RNA-binding protein Staufen homolog 1 OS=Homo sapiens GN=STAU1 PE=1 SV=2	5	5	20	12000000	9500000	11000000	9200000	11000000	12000000	10750000	10800000	1.00465	0.00669465	0.975404	0.0108155	11500000	10100000	1.06977	0.939535	0.0972972	-0.0899814	4	FALSE	TRUE	TRUE	58	411	14.1119	Tnon_mito	STAU|O95793	ENSG00000124214
EIF3I	Eukaryotic translation initiation factor 3 subunit I OS=Homo sapiens GN=EIF3I PE=1 SV=1	18	18	251	230000000	200000000	170000000	150000000	170000000	190000000	215000000	170000000	0.790698	-0.338802	0.145925	0.83587	180000000	160000000	0.837209	0.744186	-0.25634	-0.426265	4	FALSE	TRUE	TRUE	128	411	31.1436	Tnon_mito	EIF3S2|PRO2242|TRIP-1|TRIP1|eIF3-beta|eIF3-p36|Q13347	ENSG00000084623
NR1H3	Oxysterols receptor LXR-alpha OS=Homo sapiens GN=NR1H3 PE=2 SV=1	1	1	1		4600000					2300000	0	0		0.5	0.30103	0	0	0	0			0	FALSE	FALSE	FALSE	0	411	0	Tnon_mito	LXR-a|LXRA|RLD-1|Q13133	ENSG00000025434
PHGDH	D-3-phosphoglycerate dehydrogenase OS=Homo sapiens GN=PHGDH PE=1 SV=4	9	9	37	10000000	11000000	22000000	21000000	27000000	23000000	10500000	23250000	2.21429	1.14684	0.00117434	2.93021	25000000	21500000	2.38095	2.04762	1.25154	1.03395	4	TRUE	TRUE	TRUE	152	411	36.983	Tnon_mito	3-PGDH|3PGDH|HEL-S-113|PDG|PGAD|PGD|PGDH|SERA|O43175	ENSG00000092621
PNO1	RNA-binding protein PNO1 OS=Homo sapiens GN=PNO1 PE=1 SV=1	4	4	15	4400000	6500000	7600000	7000000	7000000	6200000	5450000	6950000	1.27523	0.350757	0.376672	0.424036	6600000	7300000	1.21101	1.33945	0.27621	0.42164	4	FALSE	TRUE	TRUE	17	411	4.13625	Tnon_mito	KHRBP1|RRP20|Q9NRX1	ENSG00000115946
RANBP10	Ran-binding protein 10 OS=Homo sapiens GN=RANBP10 PE=4 SV=1	1	2	3	5300000						2650000	0	0		0.5	0.30103	0	0	0	0			0	FALSE	FALSE	FALSE	12	411	2.91971	Tnon_mito	Q6VN20	ENSG00000141084
WDR26	WD repeat-containing protein 26 OS=Homo sapiens GN=WDR26 PE=1 SV=3	2	2	9	5900000	6500000	4300000		6500000	6000000	6200000	4200000	0.677419	-0.561879	0.270386	0.568016	6250000	2150000	1.00806	0.346774	0.011588	-1.52793	3	FALSE	FALSE	TRUE	28	411	6.81265	Tnon_mito	CDW2|GID7|MIP2|Q9H7D7	ENSG00000162923
GNB1	Guanine nucleotide-binding protein G(I)/G(S)/G(T) subunit beta-1 OS=Homo sapiens GN=GNB1 PE=1 SV=3	3	5	18	5000000	7300000	13000000	9500000	11000000	12000000	6150000	11375000	1.84959	0.887208	0.0672701	1.17218	11500000	11250000	1.86992	1.82927	0.902976	0.871267	4	FALSE	TRUE	TRUE	59	411	14.3552	Tnon_mito	P62873	ENSG00000078369
KIF5B	Kinesin-1 heavy chain OS=Homo sapiens GN=KIF5B PE=1 SV=1	11	11	39	4900000	3600000	15000000	17000000	18000000	16000000	4250000	16500000	3.88235	1.95693	0.000936612	3.02844	17000000	16000000	4	3.76471	2	1.91254	4	TRUE	TRUE	TRUE	97	411	23.601	Tnon_mito	HEL-S-61|KINH|KNS|KNS1|UKHC|P33176	ENSG00000170759
MYH10	Isoform 4 of Myosin-10 OS=Homo sapiens GN=MYH10	1	5	19						3900000	0	975000	100	6.64386	0.391002	0.407821	1950000	0	100	0	6.64386		1	FALSE	FALSE	TRUE	166	411	40.3893	Tnon_mito	NMMHC-IIB|NMMHCB|P35580	ENSG00000133026
MYO6	Unconventional myosin-VI OS=Homo sapiens GN=MYO6 PE=1 SV=4	1	1	1						3400000	0	850000	100	6.64386	0.391002	0.407821	1700000	0	100	0	6.64386		1	FALSE	FALSE	FALSE	42	411	10.219	Tnon_mito	DFNA22|DFNB37|Q9UM54	ENSG00000196586
RAN	GTP-binding nuclear protein Ran OS=Homo sapiens GN=RAN PE=4 SV=1	6	6	17	11000000	18000000	18000000	21000000	18000000	15000000	14500000	18000000	1.24138	0.311944	0.491292	0.308661	16500000	19500000	1.13793	1.34483	0.186413	0.427421	4	FALSE	TRUE	TRUE	154	411	37.4696	Tnon_mito	ARA24|Gsp1|TC4|P62826	ENSG00000132341
RPL27A	60S ribosomal protein L27a OS=Homo sapiens GN=RPL27A PE=1 SV=2	1	1	1						7700000	0	1925000	100	6.64386	0.391002	0.407821	3850000	0	100	0	6.64386		1	FALSE	FALSE	FALSE	198	411	48.1752	Tnon_mito	L27A|P46776	ENSG00000166441
SRPRB	Signal recognition particle receptor subunit beta OS=Homo sapiens GN=SRPRB PE=1 SV=3	10	10	41	10000000	10000000	24000000	21000000	26000000	19000000	10000000	22500000	2.25	1.16993	0.00401696	2.3961	22500000	22500000	2.25	2.25	1.16993	1.16993	4	TRUE	TRUE	TRUE	35	411	8.51582	Tnon_mito	APMCF1|Q9Y5M8	ENSG00000144867
KIAA0391	Mitochondrial ribonuclease P protein 3 OS=Homo sapiens GN=KIAA0391 PE=1 SV=2	2	2	4				2300000	2100000	3900000	0	2075000	100	6.64386	0.0808999	1.09205	3000000	1150000	100	100	6.64386	6.64386	3	FALSE	FALSE	FALSE	4	411	0.973236	Tmito	MRPP3|PRORP|O15091	ENSG00000100890
CIRBP	Cold-inducible RNA-binding protein OS=Homo sapiens GN=CIRBP PE=1 SV=1	4	4	39	57000000	63000000	39000000	42000000	52000000	58000000	60000000	47750000	0.795833	-0.329462	0.0846261	1.0725	55000000	40500000	0.916667	0.675	-0.125531	-0.567041	4	FALSE	TRUE	TRUE	107	411	26.0341	Tnon_mito	CIRP|Q14011	ENSG00000099622
FLII	Protein flightless-1 homolog OS=Homo sapiens GN=FLII PE=1 SV=2	1	1	1				47000000			0	11750000	100	6.64386	0.391002	0.407821	0	23500000	0	100		6.64386	1	FALSE	FALSE	FALSE	36	411	8.75912	Tnon_mito	FLI|FLIL|Fli1|Q13045	ENSG00000177731
NRAS	GTPase NRas OS=Homo sapiens GN=NRAS PE=1 SV=1	1	1	5	7200000		9200000	6500000	8100000	7100000	3600000	7725000	2.14583	1.10154	0.453346	0.34357	7600000	7850000	2.11111	2.18056	1.078	1.1247	4	FALSE	FALSE	TRUE	10	411	2.43309	Tnon_mito	ALPS4|N-ras|NRAS1|NS6|P01111	ENSG00000213281
GOSR2	Golgi SNAP receptor complex member 2 OS=Homo sapiens GN=GOSR2 PE=3 SV=2	1	1	1						4700000	0	1175000	100	6.64386	0.391002	0.407821	2350000	0	100	0	6.64386		1	FALSE	FALSE	FALSE	2	411	0.486618	Tnon_mito	Bos1|EPM6|GS27|O14653	ENSG00000108433
CORO7	Isoform 3 of Coronin-7 OS=Homo sapiens GN=CORO7	1	1	2				4500000	3800000		0	2075000	100	6.64386	0.183946	0.735309	1900000	2250000	100	100	6.64386	6.64386	2	FALSE	FALSE	FALSE	5	411	1.21655	Tnon_mito	0610011B16Rik|CRN7|POD1|P57737	ENSG00000262246
ATP5J2-PTCD1	Pentatricopeptide repeat-containing protein 1, mitochondrial OS=Homo sapiens GN=ATP5J2-PTCD1 PE=4 SV=1	4	4	12			4500000	5600000	5800000	6200000	0	5525000	100	6.64386	0.000619495	3.20796	6000000	5050000	100	100	6.64386	6.64386	4	TRUE	TRUE	TRUE	0	411	0	Tmito	B4DJ38	ENSG00000106246
HNRNPL	Heterogeneous nuclear ribonucleoprotein L OS=Homo sapiens GN=HNRNPL PE=1 SV=2	8	8	18	22000000	19000000	7000000	9700000	5600000	7800000	20500000	7525000	0.367073	-1.44586	0.0267063	1.57339	6700000	8350000	0.326829	0.407317	-1.61339	-1.29578	4	TRUE	TRUE	TRUE	190	411	46.2287	Tnon_mito	HNRPL|hnRNP-L|P14866	ENSG00000104824
ADAP1	Arf-GAP with dual PH domain-containing protein 1 (Fragment) OS=Homo sapiens GN=ADAP1 PE=4 SV=1	1	1	2	14000000	12000000					13000000	0	0		0.0488745	1.31092	0	0	0	0			0	TRUE	FALSE	FALSE	0	411	0	Tnon_mito	CENTA1|GCS1L|p42IP4|O75689	ENSG00000105963
PSPC1	Paraspeckle component 1 OS=Homo sapiens GN=PSPC1 PE=1 SV=1	8	8	38	6200000	6400000	29000000	28000000	29000000	33000000	6300000	29750000	4.72222	2.23947	0.000210983	3.67575	31000000	28500000	4.92063	4.52381	2.29884	2.17754	4	TRUE	TRUE	TRUE	82	411	19.9513	Tnon_mito	PSP1|Q8WXF1	ENSG00000121390
ACTC1	Actin, alpha cardiac muscle 1 OS=Homo sapiens GN=ACTC1 PE=1 SV=1	1	10	204	70000000	49000000		37000000		44000000	59500000	20250000	0.340336	-1.55497	0.0801281	1.09621	22000000	18500000	0.369748	0.310924	-1.43539	-1.68536	2	FALSE	FALSE	TRUE	354	411	86.1314	Tnon_mito	ACTC|ASD5|CMD1R|CMH11|LVNC4|P68032	ENSG00000159251
PARP4	Poly [ADP-ribose] polymerase 4 OS=Homo sapiens GN=PARP4 PE=1 SV=3	1	1	1				140000000			0	35000000	100	6.64386	0.391002	0.407821	0	70000000	0	100		6.64386	1	FALSE	FALSE	FALSE	10	411	2.43309	Tnon_mito	ADPRTL1|ARTD4|PARP-4|PARPL|PH5P|VAULT3|VPARP|VWA5C|p193|Q9UKK3	ENSG00000102699
CPD	Carboxypeptidase D OS=Homo sapiens GN=CPD PE=1 SV=2	3	3	7		2400000	6700000	1000000	2800000	5000000	1200000	3875000	3.22917	1.69116	0.216616	0.664309	3900000	3850000	3.25	3.20833	1.70044	1.68182	4	FALSE	TRUE	TRUE	4	411	0.973236	Tnon_mito	GP180|O75976	ENSG00000108582
CSNK2A2	Casein kinase II subunit alpha' OS=Homo sapiens GN=CSNK2A2 PE=1 SV=1	1	1	1						4700000	0	1175000	100	6.64386	0.391002	0.407821	2350000	0	100	0	6.64386		1	FALSE	FALSE	FALSE	23	411	5.59611	Tnon_mito	CK2A2|CSNK2A1|P19784	ENSG00000070770
DSP	Desmoplakin OS=Homo sapiens GN=DSP PE=1 SV=3	2	2	9	67000000	58000000	93000000	77000000	84000000	67000000	62500000	80250000	1.284	0.360645	0.0745029	1.12783	75500000	85000000	1.208	1.36	0.27262	0.443607	4	FALSE	FALSE	TRUE	126	411	30.6569	Tpossible_mito	DP|DPI|DPII|P15924	ENSG00000096696
EIF4B	Eukaryotic translation initiation factor 4B OS=Homo sapiens GN=EIF4B PE=2 SV=1	15	15	229	220000000	170000000	180000000	170000000	180000000	180000000	195000000	177500000	0.910256	-0.135655	0.610821	0.214086	180000000	175000000	0.923077	0.897436	-0.115477	-0.156119	4	FALSE	TRUE	TRUE	167	411	40.6326	Tnon_mito	EIF-4B|PRO1843|P23588	ENSG00000063046
CTTN	Src substrate cortactin OS=Homo sapiens GN=CTTN PE=1 SV=2	8	8	40	16000000	17000000	18000000	15000000	12000000	17000000	16500000	15500000	0.939394	-0.0901978	0.521559	0.282697	14500000	16500000	0.878788	1	-0.186413	0	4	FALSE	TRUE	TRUE	73	411	17.7616	Tnon_mito	EMS1|Q14247	ENSG00000085733
MYO1D	Unconventional myosin-Id OS=Homo sapiens GN=MYO1D PE=1 SV=2	2	2	3		4500000			2000000	2300000	2250000	1075000	0.477778	-1.06559	0.693748	0.158798	2150000	0	0.955556	0	-0.0655883		2	FALSE	FALSE	FALSE	33	411	8.0292	Tnon_mito	myr4|O94832	ENSG00000176658
PSMA1	Isoform Long of Proteasome subunit alpha type-1 OS=Homo sapiens GN=PSMA1	2	2	7			12000000	11000000	30000000	14000000	0	16750000	100	6.64386	0.0329983	1.48151	22000000	11500000	100	100	6.64386	6.64386	4	TRUE	FALSE	TRUE	86	411	20.9246	Tnon_mito	HC2|HEL-S-275|NU|PROS30|P25786	ENSG00000129084
PSMA3	Proteasome subunit alpha type-3 OS=Homo sapiens GN=PSMA3 PE=1 SV=2	2	2	8			8800000	8800000	11000000	11000000	0	9900000	100	6.64386	0.000573673	3.24134	11000000	8800000	100	100	6.64386	6.64386	4	TRUE	FALSE	TRUE	78	411	18.9781	Tnon_mito	HC8|PSC3|P25788	ENSG00000100567
SNRPB2	U2 small nuclear ribonucleoprotein B'' OS=Homo sapiens GN=SNRPB2 PE=1 SV=1	3	4	27	41000000	32000000	32000000	24000000	26000000	29000000	36500000	27750000	0.760274	-0.395409	0.272572	0.564519	27500000	28000000	0.753425	0.767123	-0.408465	-0.38247	4	FALSE	TRUE	TRUE	94	411	22.871	Tnon_mito	Msl1|P08579	ENSG00000125870
ARHGEF5	Rho guanine nucleotide exchange factor 5 OS=Homo sapiens GN=ARHGEF5 PE=1 SV=3	1	1	1			8600000				0	2150000	100	6.64386	0.391002	0.407821	0	4300000	0	100		6.64386	1	FALSE	FALSE	FALSE	1	411	0.243309	Tnon_mito	GEF5|P60|TIM|TIM1|Q12774	ENSG00000050327
PGRMC2	Isoform 2 of Membrane-associated progesterone receptor component 2 OS=Homo sapiens GN=PGRMC2	2	3	8			12000000	15000000	15000000	16000000	0	14500000	100	6.64386	0.000463884	3.33359	15500000	13500000	100	100	6.64386	6.64386	4	TRUE	FALSE	TRUE	35	411	8.51582	Tnon_mito	DG6|PMBP|O15173	ENSG00000164040
RBM14	RNA-binding protein 14 OS=Homo sapiens GN=RBM14 PE=1 SV=2	1	1	1					6900000		0	1725000	100	6.64386	0.391002	0.407821	3450000	0	100	0	6.64386		1	FALSE	FALSE	FALSE	52	411	12.6521	Tnon_mito	COAA|PSP2|SIP|SYTIP1|TMEM137|A0A0S2Z4Z0	ENSG00000239306
SPEN	Msx2-interacting protein OS=Homo sapiens GN=SPEN PE=1 SV=1	2	2	6	160000000		72000000	96000000		40000000	80000000	52000000	0.65	-0.621488	0.786606	0.104243	20000000	84000000	0.25	1.05	-2	0.0703893	3	FALSE	FALSE	TRUE	31	411	7.54258	Tnon_mito	HIAA0929|MINT|RBM15C|SHARP|Q96T58	ENSG00000065526
MGA	Isoform 4 of MAX gene-associated protein OS=Homo sapiens GN=MGA	7	7	17	14000000	16000000	13000000	12000000	20000000	18000000	15000000	15750000	1.05	0.0703893	0.747686	0.126281	19000000	12500000	1.26667	0.833333	0.341037	-0.263034	4	FALSE	TRUE	TRUE	47	411	11.4355	Tnon_mito	MAD5|MXD5|Q8IWI9	ENSG00000174197
ACTR2	Isoform 2 of Actin-related protein 2 OS=Homo sapiens GN=ACTR2	1	1	1	4700000						2350000	0	0		0.5	0.30103	0	0	0	0			0	FALSE	FALSE	FALSE	51	411	12.4088	Tnon_mito	ARP2|P61160	ENSG00000138071
BAG2	BAG family molecular chaperone regulator 2 OS=Homo sapiens GN=BAG2 PE=1 SV=1	3	3	15	8500000	14000000	10000000	13000000	13000000	13000000	11250000	12250000	1.08889	0.122857	0.779	0.108462	13000000	11500000	1.15556	1.02222	0.208587	0.0317089	4	FALSE	TRUE	TRUE	96	411	23.3577	Tnon_mito	BAG-2|dJ417I1.2|O95816	ENSG00000112208
EIF4E	Isoform 2 of Eukaryotic translation initiation factor 4E OS=Homo sapiens GN=EIF4E	6	6	60	150000000	120000000	120000000	100000000	120000000	140000000	135000000	120000000	0.888889	-0.169925	0.489747	0.310028	130000000	110000000	0.962963	0.814815	-0.0544478	-0.295456	4	FALSE	TRUE	TRUE	19	411	4.62287	Tnon_mito	AUTS19|CBP|EIF4E1|EIF4EL1|EIF4F|P06730	ENSG00000151247
COPS5	COP9 signalosome complex subunit 5 OS=Homo sapiens GN=COPS5 PE=1 SV=4	1	1	6	1800000	3200000	4500000	3300000	4000000	4300000	2500000	4025000	1.61	0.687061	0.243232	0.613979	4150000	3900000	1.66	1.56	0.731183	0.641546	4	FALSE	FALSE	TRUE	26	411	6.32603	Tnon_mito	CSN5|JAB1|MOV-34|SGN5|Q92905	ENSG00000121022
ANKRD62	Ankyrin repeat domain-containing protein 62 OS=Homo sapiens GN=ANKRD62 PE=2 SV=4	1	1	1						5500000000	0	1375000000	100	6.64386	0.391002	0.407821	2750000000	0	100	0	6.64386		1	FALSE	FALSE	FALSE				Tnon_mito	DKFZp779B1634|A6NC57	ENSG00000181626
DOCK7	Dedicator of cytokinesis protein 7 OS=Homo sapiens GN=DOCK7 PE=1 SV=4	13	13	35	4900000	4700000	11000000	8600000	9700000	11000000	4800000	10075000	2.09896	1.06967	0.00233329	2.63203	10350000	9800000	2.15625	2.04167	1.10852	1.02975	4	TRUE	TRUE	TRUE	30	411	7.29927	Tnon_mito	ZIR2|Q96N67	ENSG00000116641
LSM1	U6 snRNA-associated Sm-like protein LSm1 OS=Homo sapiens GN=LSM1 PE=1 SV=1	1	1	4	4700000	6000000		5500000		6900000	5350000	3100000	0.579439	-0.787271	0.313371	0.503941	3450000	2750000	0.64486	0.514019	-0.632943	-0.960107	2	FALSE	FALSE	FALSE	4	411	0.973236	Tnon_mito	CASM|YJL124C|O15116	ENSG00000175324
GEMIN7	Gem-associated protein 7 OS=Homo sapiens GN=GEMIN7 PE=1 SV=1	1	1	1						3500000	0	875000	100	6.64386	0.391002	0.407821	1750000	0	100	0	6.64386		1	FALSE	FALSE	FALSE	0	411	0	Tnon_mito	SIP3|Q9H840	ENSG00000142252
RPL35A	60S ribosomal protein L35a OS=Homo sapiens GN=RPL35A PE=1 SV=2	2	2	8	18000000	12000000	19000000	17000000	17000000	16000000	15000000	17250000	1.15	0.201634	0.588556	0.230212	16500000	18000000	1.1	1.2	0.137504	0.263034	4	FALSE	FALSE	TRUE	108	411	26.2774	Tmito	DBA5|L35A|P18077	ENSG00000182899
SEPT7	Septin-7 OS=Homo sapiens GN=SEPT7 PE=1 SV=2	2	3	26	8600000	7400000	11000000		11000000		8000000	5500000	0.6875	-0.540568	0.492203	0.307856	5500000	5500000	0.6875	0.6875	-0.540568	-0.540568	2	FALSE	FALSE	TRUE	70	411	17.0316	Tnon_mito	CDC10|CDC3|NBLA02942|SEPT7A|Q16181	ENSG00000122545
NCL	Nucleolin OS=Homo sapiens GN=NCL PE=1 SV=3	13	13	141	120000000	120000000	93000000	89000000	130000000	120000000	120000000	108000000	0.9	-0.152003	0.3186	0.496755	125000000	91000000	1.04167	0.758333	0.0588937	-0.399096	4	FALSE	TRUE	TRUE	261	411	63.5036	Tnon_mito	C23|P19338	ENSG00000115053
PRKCSH	Glucosidase 2 subunit beta OS=Homo sapiens GN=PRKCSH PE=2 SV=1	10	10	61	19000000	19000000	37000000	36000000	37000000	39000000	19000000	37250000	1.96053	0.971241	8.99696e-05	4.0459	38000000	36500000	2	1.92105	1	0.941897	4	TRUE	TRUE	TRUE	75	411	18.2482	Tnon_mito	AGE-R2|G19P1|PCLD|PKCSH|PLD1|P14314	ENSG00000130175
ST13	Hsc70-interacting protein OS=Homo sapiens GN=ST13 PE=1 SV=2	3	3	22	5800000	7200000	28000000	22000000	25000000	25000000	6500000	25000000	3.84615	1.94342	0.000195308	3.70928	25000000	25000000	3.84615	3.84615	1.94342	1.94342	4	TRUE	TRUE	TRUE	83	411	20.1946	Tnon_mito	AAG2|FAM10A1|FAM10A4|HIP|HOP|HSPABP|HSPABP1|P48|PRO0786|SNC6|P50502	ENSG00000100380
AHNAK	Neuroblast differentiation-associated protein AHNAK OS=Homo sapiens GN=AHNAK PE=1 SV=2	3	3	12	4700000	4100000	4500000	2800000		5000000	4400000	3075000	0.698864	-0.516917	0.330147	0.481292	2500000	3650000	0.568182	0.829545	-0.815575	-0.269607	3	FALSE	TRUE	TRUE	62	411	15.0852	Tnon_mito	AHNAKRS|Q09666	ENSG00000124942
FLNA	Filamin-A OS=Homo sapiens GN=FLNA PE=1 SV=4	51	56	310	46000000	42000000	40000000	35000000	42000000	41000000	44000000	39500000	0.897727	-0.155651	0.201225	0.696319	41500000	37500000	0.943182	0.852273	-0.0843922	-0.230613	4	FALSE	TRUE	TRUE	226	411	54.9878	Tnon_mito	ABP-280|ABPX|CSBS|CVD1|FLN|FLN-A|FLN1|FMD|MNS|NHBP|OPD|OPD1|OPD2|XLVD|XMVD|P21333	ENSG00000196924
SEC61B	Protein transport protein Sec61 subunit beta OS=Homo sapiens GN=SEC61B PE=1 SV=2	2	2	4	6600000			17000000	14000000		3300000	7750000	2.34848	1.23173	0.47295	0.325184	7000000	8500000	2.12121	2.57576	1.08489	1.365	2	FALSE	FALSE	FALSE	35	411	8.51582	Tnon_mito	P60468	ENSG00000106803
SEC61G	Protein transport protein Sec61 subunit gamma OS=Homo sapiens GN=SEC61G PE=1 SV=1	1	1	1					5000000		0	1250000	100	6.64386	0.391002	0.407821	2500000	0	100	0	6.64386		1	FALSE	FALSE	FALSE	2	411	0.486618	Tnon_mito	SSS1|P60059	ENSG00000132432
DPY30	Protein dpy-30 homolog OS=Homo sapiens GN=DPY30 PE=1 SV=1	3	3	14	19000000	14000000	21000000	16000000	15000000	15000000	16500000	16750000	1.01515	0.0216951	0.939975	0.0268836	15000000	18500000	0.909091	1.12121	-0.137504	0.165059	4	FALSE	TRUE	TRUE	43	411	10.4623	Tnon_mito	Cps25|HDPY-30|Saf19|Q9C005	ENSG00000162961
DGAT1	Diacylglycerol O-acyltransferase 1 OS=Homo sapiens GN=DGAT1 PE=1 SV=2	4	4	17			20000000	14000000	19000000	15000000	0	17000000	100	6.64386	0.00139384	2.85579	17000000	17000000	100	100	6.64386	6.64386	4	TRUE	TRUE	TRUE	0	411	0	Tnon_mito	ARAT|ARGP1|DGAT|O75907	ENSG00000185000
PSME4	Proteasome activator complex subunit 4 OS=Homo sapiens GN=PSME4 PE=2 SV=1	1	1	9	30000000	36000000	17000000	23000000	6800000	7500000	33000000	13575000	0.411364	-1.28151	0.0195427	1.70902	7150000	20000000	0.216667	0.606061	-2.20645	-0.722466	4	TRUE	FALSE	TRUE	4	411	0.973236	Tnon_mito	PA200|Q14997	ENSG00000068878
TRIP4	Activating signal cointegrator 1 OS=Homo sapiens GN=TRIP4 PE=1 SV=4	1	1	2					7200000	8000000	0	3800000	100	6.64386	0.182571	0.738569	7600000	0	100	0	6.64386		2	FALSE	FALSE	FALSE	2	411	0.486618	Tnon_mito	ASC-1|ASC1|HsT17391|Q15650	ENSG00000103671
ARL1	ADP-ribosylation factor-like protein 1 OS=Homo sapiens GN=ARL1 PE=2 SV=1	1	1	1			3400000				0	850000	100	6.64386	0.391002	0.407821	0	1700000	0	100		6.64386	1	FALSE	FALSE	FALSE	28	411	6.81265	Tnon_mito	ARFL1|P40616	ENSG00000120805
MCM4	DNA replication licensing factor MCM4 OS=Homo sapiens GN=MCM4 PE=1 SV=5	8	8	35	7700000	7000000	10000000	10000000	11000000	12000000	7350000	10750000	1.46259	0.548521	0.00533599	2.27279	11500000	10000000	1.56463	1.36054	0.645818	0.444184	4	TRUE	TRUE	TRUE	113	411	27.4939	Tnon_mito	CDC21|CDC54|NKCD|NKGCD|P1-CDC21|hCdc21|P33991	ENSG00000104738
KHDRBS1	KH domain-containing, RNA-binding, signal transduction-associated protein 1 OS=Homo sapiens GN=KHDRBS1 PE=1 SV=1	1	1	2	9900000	9300000					9600000	0	0		0.0198879	1.70141	0	0	0	0			0	TRUE	FALSE	FALSE	138	411	33.5766	Tnon_mito	Sam68|p62|p68|Q07666	ENSG00000121774
KIF2C	Kinesin-like protein KIF2C OS=Homo sapiens GN=KIF2C PE=1 SV=2	1	1	1						4600000	0	1150000	100	6.64386	0.391002	0.407821	2300000	0	100	0	6.64386		1	FALSE	FALSE	FALSE	23	411	5.59611	Tnon_mito	CT139|KNSL6|MCAK|Q99661	ENSG00000142945
PRPF6	Pre-mRNA-processing factor 6 OS=Homo sapiens GN=PRPF6 PE=1 SV=1	1	1	2	5800000			4600000			2900000	1150000	0.396552	-1.33442	0.654663	0.183982	0	2300000	0	0.793103		-0.334419	1	FALSE	FALSE	FALSE	92	411	22.3844	Tpossible_mito	ANT-1|ANT1|C20orf14|Prp6|RP60|SNRNP102|TOM|U5-102K|hPrp6|O94906	ENSG00000101161
SF3B6	Splicing factor 3B subunit 6 OS=Homo sapiens GN=SF3B6 PE=1 SV=1	4	4	16	9200000	13000000	9500000	9400000	12000000	12000000	11100000	10725000	0.966216	-0.049582	0.878293	0.0563605	12000000	9450000	1.08108	0.851351	0.112475	-0.232173	4	FALSE	TRUE	TRUE				Tnon_mito	HSPC175|Ht006|P14|SAP14|SAP14a|SF3B14|SF3B14a|Q9Y3B4	ENSG00000115128
ALKBH5	RNA demethylase ALKBH5 OS=Homo sapiens GN=ALKBH5 PE=1 SV=2	7	7	36	15000000	13000000	13000000	12000000	18000000	17000000	14000000	15000000	1.07143	0.0995357	0.604799	0.218389	17500000	12500000	1.25	0.892857	0.321928	-0.163499	4	FALSE	TRUE	TRUE	12	411	2.91971	Tnon_mito	ABH5|OFOXD|OFOXD1|Q6P6C2	ENSG00000091542
ELP2	Isoform 6 of Elongator complex protein 2 OS=Homo sapiens GN=ELP2	2	2	5			6900000	6100000	7800000	7400000	0	7050000	100	6.64386	0.000306313	3.51383	7600000	6500000	100	100	6.64386	6.64386	4	TRUE	FALSE	TRUE	4	411	0.973236	Tnon_mito	SHINC-2|STATIP1|StIP|Q6IA86	ENSG00000134759
PSMD8	26S proteasome non-ATPase regulatory subunit 8 OS=Homo sapiens GN=PSMD8 PE=1 SV=2	7	7	36	21000000	19000000	28000000	28000000	34000000	34000000	20000000	31000000	1.55	0.632268	0.00532813	2.27343	34000000	28000000	1.7	1.4	0.765535	0.485427	4	TRUE	TRUE	TRUE	44	411	10.7056	Tnon_mito	HEL-S-91n|HIP6|HYPF|Nin1p|Rpn12|S14|p31|P48556	ENSG00000099341
CHD3	Isoform 3 of Chromodomain-helicase-DNA-binding protein 3 OS=Homo sapiens GN=CHD3	2	2	2		14000000		15000000			7000000	3750000	0.535714	-0.900464	0.730174	0.136573	0	7500000	0	1.07143		0.0995357	1	FALSE	FALSE	FALSE	56	411	13.6253	Tnon_mito	Mi-2a|Mi2-ALPHA|ZFH|Q12873	ENSG00000170004
DHX15	Putative pre-mRNA-splicing factor ATP-dependent RNA helicase DHX15 OS=Homo sapiens GN=DHX15 PE=1 SV=2	5	5	16	8400000	9700000		4900000	6100000	3700000	9050000	3675000	0.406077	-1.30017	0.0222861	1.65196	4900000	2450000	0.541436	0.270718	-0.885136	-1.88514	3	TRUE	TRUE	TRUE	168	411	40.8759	Tnon_mito	DBP1|DDX15|HRH2|PRP43|PRPF43|PrPp43p|O43143	ENSG00000109606
MARK2	Serine/threonine-protein kinase MARK2 OS=Homo sapiens GN=MARK2 PE=1 SV=2	4	4	15	9600000	15000000	15000000	10000000	14000000	17000000	12300000	14000000	1.13821	0.186769	0.646495	0.189435	15500000	12500000	1.26016	1.01626	0.33361	0.0232698	4	FALSE	TRUE	TRUE	6	411	1.45985	Tnon_mito	EMK-1|EMK1|PAR-1|Par-1b|Par1b|Q7KZI7	ENSG00000072518
HNRNPU	Heterogeneous nuclear ribonucleoprotein U OS=Homo sapiens GN=HNRNPU PE=1 SV=6	24	24	284	370000000	360000000	340000000	350000000	360000000	380000000	365000000	357500000	0.979452	-0.0299532	0.490695	0.309188	370000000	345000000	1.0137	0.945205	0.0196288	-0.0813001	4	FALSE	TRUE	TRUE	280	411	68.1265	Tnon_mito	HNRPU|SAF-A|U21.1|hnRNP U|Q00839	ENSG00000153187
RBM39	RNA-binding protein 39 OS=Homo sapiens GN=RBM39 PE=1 SV=2	4	4	12	4500000	4400000	4700000	4500000	5400000	5300000	4450000	4975000	1.11798	0.160891	0.0959097	1.01814	5350000	4600000	1.20225	1.03371	0.265734	0.0478285	4	FALSE	TRUE	TRUE	163	411	39.6594	Tnon_mito	CAPER|CAPERalpha|FSAP59|HCC1|RNPC2|Q14498	ENSG00000131051
MELK	Maternal embryonic leucine zipper kinase OS=Homo sapiens GN=MELK PE=1 SV=3	3	3	6			12000000	8400000	10000000	7300000	0	9425000	100	6.64386	0.00269511	2.56942	8650000	10200000	100	100	6.64386	6.64386	4	TRUE	TRUE	TRUE	2	411	0.486618	Tnon_mito	HPK38|Q14680	ENSG00000165304
RNPS1	RNA-binding protein with serine-rich domain 1 OS=Homo sapiens GN=RNPS1 PE=1 SV=1	1	1	5	15000000	11000000	12000000	11000000	12000000		13000000	8750000	0.673077	-0.571157	0.298196	0.525499	6000000	11500000	0.461538	0.884615	-1.11548	-0.176878	3	FALSE	FALSE	TRUE	109	411	26.5207	Tnon_mito	E5.1|Q15287	ENSG00000205937
SEC23IP	SEC23-interacting protein OS=Homo sapiens GN=SEC23IP PE=1 SV=1	1	1	3			13000000	11000000	14000000		0	9500000	100	6.64386	0.0603413	1.21939	7000000	12000000	100	100	6.64386	6.64386	3	FALSE	FALSE	FALSE	19	411	4.62287	Tnon_mito	P125|P125A|Q9Y6Y8	ENSG00000107651
ATXN2L	Isoform 3 of Ataxin-2-like protein OS=Homo sapiens GN=ATXN2L	6	6	20	6100000	6700000	8700000	9800000	15000000	8500000	6400000	10500000	1.64062	0.714246	0.0724181	1.14015	11750000	9250000	1.83594	1.44531	0.876517	0.531381	4	FALSE	TRUE	TRUE	127	411	30.9002	Tnon_mito	A2D|A2LG|A2LP|A2RP|Q8WWM7	ENSG00000168488
SH3GLB1	Isoform 2 of Endophilin-B1 OS=Homo sapiens GN=SH3GLB1	2	2	5			3000000	5400000	4200000	5200000	0	4450000	100	6.64386	0.00394545	2.4039	4700000	4200000	100	100	6.64386	6.64386	4	TRUE	FALSE	TRUE	5	411	1.21655	Tpossible_mito	Bif-1|PPP1R70|dJ612B15.2|Q9Y371	ENSG00000097033
LRCH2	Leucine-rich repeat and calponin homology domain-containing protein 2 OS=Homo sapiens GN=LRCH2 PE=2 SV=2	2	2	6	4000000	2700000	4200000		2700000	2600000	3350000	2375000	0.708955	-0.496234	0.423604	0.37304	2650000	2100000	0.791045	0.626866	-0.338169	-0.673772	3	FALSE	FALSE	TRUE	5	411	1.21655	Tnon_mito	dA204F4.4|Q5VUJ6	ENSG00000130224
RB1CC1	RB1-inducible coiled-coil protein 1 OS=Homo sapiens GN=RB1CC1 PE=1 SV=3	6	7	18	8200000	8400000	4200000	6000000	5100000	4500000	8300000	4950000	0.596386	-0.745683	0.00250069	2.60194	4800000	5100000	0.578313	0.614458	-0.790077	-0.702614	4	TRUE	TRUE	TRUE	1	411	0.243309	Tnon_mito	ATG17|CC1|FIP200|Q8TDY2	ENSG00000023287
NCAPD2	Condensin complex subunit 1 OS=Homo sapiens GN=NCAPD2 PE=1 SV=3	2	2	3					3100000	3100000	0	1550000	100	6.64386	0.18169	0.740669	3100000	0	100	0	6.64386		2	FALSE	FALSE	FALSE	52	411	12.6521	Tnon_mito	CAP-D2|CNAP1|hCAP-D2|Q15021	ENSG00000010292
MAP4	Microtubule-associated protein OS=Homo sapiens GN=MAP4 PE=2 SV=1	5	5	15	5500000	5800000	11000000		11000000	9600000	5650000	7900000	1.39823	0.483602	0.45912	0.338074	10300000	5500000	1.82301	0.973451	0.866322	-0.0388192	3	FALSE	TRUE	TRUE	86	411	20.9246	Tnon_mito	P27816	ENSG00000047849
RPL21	60S ribosomal protein L21 OS=Homo sapiens GN=RPL21 PE=1 SV=2	1	1	6		21000000	26000000	25000000	28000000	32000000	10500000	27750000	2.64286	1.4021	0.343476	0.464104	30000000	25500000	2.85714	2.42857	1.51457	1.28011	4	FALSE	FALSE	TRUE	135	411	32.8467	Tnon_mito	L21|P46778	ENSG00000122026
SRP68	Signal recognition particle subunit SRP68 OS=Homo sapiens GN=SRP68 PE=1 SV=2	7	7	31	6600000	6100000	15000000	12000000	14000000	13000000	6350000	13500000	2.12598	1.08813	0.000717435	3.14422	13500000	13500000	2.12598	2.12598	1.08813	1.08813	4	TRUE	TRUE	TRUE	71	411	17.2749	Tnon_mito	Q9UHB9	ENSG00000167881
ZNF598	Zinc finger protein 598 OS=Homo sapiens GN=ZNF598 PE=1 SV=1	6	6	19	3600000		11000000	11000000	9700000	11000000	1800000	10675000	5.93056	2.56817	0.118027	0.928017	10350000	11000000	5.75	6.11111	2.52356	2.61143	4	FALSE	TRUE	TRUE	17	411	4.13625	Tnon_mito	Q86UK7	ENSG00000167962
SCARB2	Lysosome membrane protein 2 OS=Homo sapiens GN=SCARB2 PE=1 SV=2	4	4	21	3200000	4900000	11000000	10000000	12000000	11000000	4050000	11000000	2.71605	1.44151	0.0378331	1.42213	11500000	10500000	2.83951	2.59259	1.50564	1.3744	4	TRUE	TRUE	TRUE	0	411	0	Tnon_mito	AMRF|CD36L2|EPM4|HLGP85|LGP85|LIMP-2|LIMPII|SR-BII|Q14108	ENSG00000138760
GRN	Granulins OS=Homo sapiens GN=GRN PE=1 SV=2	3	3	9	7700000	13000000	5800000		12000000	8900000	10350000	6675000	0.644928	-0.632791	0.394433	0.404027	10450000	2900000	1.00966	0.280193	0.0138722	-1.83551	3	FALSE	TRUE	TRUE	9	411	2.18978	Tpossible_mito	CLN11|GEP|GP88|PCDGF|PEPI|PGRN|P28799	ENSG00000030582
PRKAR1A	cAMP-dependent protein kinase type I-alpha regulatory subunit OS=Homo sapiens GN=PRKAR1A PE=1 SV=1	2	2	4		3400000			7500000	4600000	1700000	3025000	1.77941	0.8314	0.631349	0.199731	6050000	0	3.55882	0	1.8314		2	FALSE	FALSE	FALSE	19	411	4.62287	Tnon_mito	ACRDYS1|ADOHR|CAR|CNC|CNC1|PKR1|PPNAD1|PRKAR1|TSE1|P10644	ENSG00000108946
EIF1B	Eukaryotic translation initiation factor 1b OS=Homo sapiens GN=EIF1B PE=1 SV=2	2	6	39	8100000	6400000	7600000	8600000	5300000	5300000	7250000	6700000	0.924138	-0.11382	0.676127	0.169972	5300000	8100000	0.731034	1.11724	-0.451989	0.159941	4	FALSE	FALSE	TRUE	19	411	4.62287	Tnon_mito	GC20|O60739	ENSG00000114784
ATP6V1F	Isoform 2 of V-type proton ATPase subunit F OS=Homo sapiens GN=ATP6V1F	1	1	1		2700000					1350000	0	0		0.5	0.30103	0	0	0	0			0	FALSE	FALSE	FALSE	3	411	0.729927	Tnon_mito	ATP6S14|VATF|Vma7|Q16864	ENSG00000128524
BZW1	Isoform 3 of Basic leucine zipper and W2 domain-containing protein 1 OS=Homo sapiens GN=BZW1	2	5	22					9600000	9200000	0	4700000	100	6.64386	0.181834	0.740324	9400000	0	100	100	6.64386	6.64386	2	FALSE	FALSE	TRUE	12	411	2.91971	Tnon_mito	BZAP45|Nbla10236|Q7L1Q6	ENSG00000082153
NPM3	Nucleoplasmin-3 OS=Homo sapiens GN=NPM3 PE=1 SV=3	1	1	8	4500000	5800000	5800000	7300000	5800000	5800000	5150000	6175000	1.19903	0.261867	0.323763	0.489773	5800000	6550000	1.12621	1.27184	0.17148	0.346922	4	FALSE	FALSE	TRUE	49	411	11.9221	Tnon_mito	PORMIN|TMEM123|O75607	ENSG00000107833
FAM207A	Protein FAM207A OS=Homo sapiens GN=FAM207A PE=1 SV=2	1	1	1					2300000		0	575000	100	6.64386	0.391002	0.407821	1150000	0	100	0	6.64386		1	FALSE	FALSE	FALSE	16	411	3.89294	Tnon_mito	C21orf70|Q9NSI2	ENSG00000160256
FAM195B	HCG1818442, isoform CRA_a OS=Homo sapiens GN=FAM195B PE=4 SV=1	2	2	3		9500000				8600000	4750000	2150000	0.452632	-1.14359	0.683821	0.165057	4300000	0	0.905263	0	-0.143591		1	FALSE	FALSE	FALSE	47	411	11.4355	Tnon_mito	C9JLW8	ENSG00000225663
CAPNS1	Calpain small subunit 1 OS=Homo sapiens GN=CAPNS1 PE=2 SV=1	1	1	1			1400000				0	350000	100	6.64386	0.391002	0.407821	0	700000	0	100		6.64386	1	FALSE	FALSE	FALSE	22	411	5.3528	Tnon_mito	30K|CALPAIN4|CANP|CANPS|CAPN4|CDPS|CSS1|P04632	ENSG00000126247
COPA	Isoform 2 of Coatomer subunit alpha OS=Homo sapiens GN=COPA	19	19	69	11000000	9400000	26000000	25000000	26000000	26000000	10200000	25750000	2.52451	1.336	0.0200582	1.69771	26000000	25500000	2.54902	2.5	1.34994	1.32193	4	TRUE	TRUE	TRUE	86	411	20.9246	Tnon_mito	HEP-COP|P53621	ENSG00000122218
HDLBP	Vigilin OS=Homo sapiens GN=HDLBP PE=1 SV=2	7	7	13	5800000	5600000	7300000	8200000	6900000	7400000	5700000	7450000	1.30702	0.386279	0.00502701	2.29869	7150000	7750000	1.25439	1.35965	0.326981	0.443234	4	TRUE	TRUE	TRUE	71	411	17.2749	Tnon_mito	HBP|PRO2900|VGL|Q00341	ENSG00000115677
MYO1B	Unconventional myosin-Ib OS=Homo sapiens GN=MYO1B PE=1 SV=3	1	1	1		4400000					2200000	0	0		0.5	0.30103	0	0	0	0			0	FALSE	FALSE	FALSE	69	411	16.7883	Tnon_mito	myr1|O43795	ENSG00000128641
PCBP2	Isoform 2 of Poly(rC)-binding protein 2 OS=Homo sapiens GN=PCBP2	5	9	49	38000000	31000000	46000000	38000000	41000000	44000000	34500000	42250000	1.22464	0.292355	0.22371	0.650315	42500000	42000000	1.23188	1.21739	0.300866	0.283793	4	FALSE	TRUE	TRUE	189	411	45.9854	Tnon_mito	HNRNPE2|HNRPE2|hnRNP-E2|Q15366	ENSG00000197111
PTBP1	Isoform 3 of Polypyrimidine tract-binding protein 1 OS=Homo sapiens GN=PTBP1	12	12	83	23000000	34000000	34000000	33000000	31000000	32000000	28500000	32500000	1.14035	0.189478	0.59911	0.222494	31500000	33500000	1.10526	1.17544	0.14439	0.233199	4	FALSE	TRUE	TRUE	172	411	41.8491	Tnon_mito	HNRNP-I|HNRNPI|HNRPI|PTB|PTB-1|PTB-T|PTB2|PTB3|PTB4|pPTB|P26599	ENSG00000011304
RPL4	60S ribosomal protein L4 OS=Homo sapiens GN=RPL4 PE=1 SV=5	5	5	21	17000000	19000000	21000000	19000000	21000000	21000000	18000000	20500000	1.13889	0.187627	0.192455	0.715671	21000000	20000000	1.16667	1.11111	0.222392	0.152003	4	FALSE	TRUE	TRUE	197	411	47.9319	Tnon_mito	L4|P36578	ENSG00000174444
STIM1	Stromal interaction molecule 1 OS=Homo sapiens GN=STIM1 PE=1 SV=3	1	1	1	1900000						950000	0	0		0.5	0.30103	0	0	0	0			0	FALSE	FALSE	FALSE	2	411	0.486618	Tnon_mito	D11S4896E|GOK|IMD10|TAM|Q13586	ENSG00000167323
COPB2	Coatomer subunit beta' OS=Homo sapiens GN=COPB2 PE=1 SV=2	20	20	65	14000000	12000000	25000000	26000000	29000000	30000000	13000000	27500000	2.11538	1.08092	0.00135852	2.86694	29500000	25500000	2.26923	1.96154	1.1822	0.971986	4	TRUE	TRUE	TRUE	79	411	19.2214	Tnon_mito	beta'-COP|P35606	ENSG00000184432
MPDU1	Mannose-P-dolichol utilization defect 1 protein OS=Homo sapiens GN=MPDU1 PE=1 SV=2	1	1	4			3400000	4300000	4300000	4500000	0	4125000	100	6.64386	0.000463056	3.33437	4400000	3850000	100	100	6.64386	6.64386	4	TRUE	FALSE	FALSE	5	411	1.21655	Tpossible_mito	CDGIF|HBEBP2BPA|Lec35|My008|PP3958|PQLC5|SL15|O75352	ENSG00000129255
SYNCRIP	Heterogeneous nuclear ribonucleoprotein Q OS=Homo sapiens GN=SYNCRIP PE=1 SV=2	9	9	39	20000000	24000000	16000000	21000000	22000000	24000000	22000000	20750000	0.943182	-0.0843922	0.672087	0.172575	23000000	18500000	1.04545	0.840909	0.0641303	-0.249978	4	FALSE	TRUE	TRUE	197	411	47.9319	Tnon_mito	GRY-RBP|GRYRBP|HNRNPQ|HNRPQ1|NSAP1|PP68|hnRNP-Q|O60506	ENSG00000135316
VAT1	Synaptic vesicle membrane protein VAT-1 homolog OS=Homo sapiens GN=VAT1 PE=1 SV=2	13	13	121	50000000	46000000	65000000	58000000	69000000	64000000	48000000	64000000	1.33333	0.415037	0.00975321	2.01085	66500000	61500000	1.38542	1.28125	0.47032	0.357552	4	TRUE	TRUE	TRUE	35	411	8.51582	Tpossible_mito	VATI|Q99536	ENSG00000108828
PCYOX1	Prenylcysteine oxidase 1 OS=Homo sapiens GN=PCYOX1 PE=1 SV=3	7	7	28	7300000	5600000	22000000	13000000	19000000	14000000	6450000	17000000	2.63566	1.39816	0.01153	1.93817	16500000	17500000	2.55814	2.71318	1.35509	1.43998	4	TRUE	TRUE	TRUE	3	411	0.729927	Tnon_mito	PCL1|Q9UHG3	ENSG00000116005
SH3GLB2	Isoform 2 of Endophilin-B2 OS=Homo sapiens GN=SH3GLB2	1	1	1						3100000	0	775000	100	6.64386	0.391002	0.407821	1550000	0	100	0	6.64386		1	FALSE	FALSE	FALSE	10	411	2.43309	Tnon_mito	PP6569|PP9455|RRIG1|Q9NR46	ENSG00000148341
MIA3	Melanoma inhibitory activity protein 3 OS=Homo sapiens GN=MIA3 PE=2 SV=1	1	1	1			3500000				0	875000	100	6.64386	0.391002	0.407821	0	1750000	0	100		6.64386	1	FALSE	FALSE	FALSE	16	411	3.89294	Tnon_mito	ARNT|D320|TANGO|TANGO1|UNQ6077|Q5JRA6	ENSG00000154305
CSDE1	Isoform 4 of Cold shock domain-containing protein E1 OS=Homo sapiens GN=CSDE1	2	2	2			4500000			4600000	0	2275000	100	6.64386	0.181729	0.740577	2300000	2250000	100	100	6.64386	6.64386	2	FALSE	FALSE	FALSE	67	411	16.3017	Tpossible_mito	D1S155E|RP5-1000E10.3|UNR|O75534	ENSG00000009307
GNAI2	Isoform sGi2 of Guanine nucleotide-binding protein G(i) subunit alpha-2 OS=Homo sapiens GN=GNAI2	2	2	11	9500000	9800000	10000000	4300000	12000000	12000000	9650000	9575000	0.992228	-0.0112565	0.969796	0.0133196	12000000	7150000	1.24352	0.740933	0.314434	-0.432586	4	FALSE	FALSE	TRUE	50	411	12.1655	Tnon_mito	GIP|GNAI2B|H_LUCA15.1|H_LUCA16.1|P04899	ENSG00000114353
ALDOA	Isoform 2 of Fructose-bisphosphate aldolase A OS=Homo sapiens GN=ALDOA	2	2	12	14000000	12000000	17000000	14000000	16000000	18000000	13000000	16250000	1.25	0.321928	0.105309	0.977533	17000000	15500000	1.30769	1.19231	0.387023	0.253757	4	FALSE	FALSE	TRUE	172	411	41.8491	Tpossible_mito	ALDA|GSD12|HEL-S-87p|P04075	ENSG00000149925
ARPC4	Isoform 2 of Actin-related protein 2/3 complex subunit 4 OS=Homo sapiens GN=ARPC4	1	1	1		8200000					4100000	0	0		0.5	0.30103	0	0	0	0			0	FALSE	FALSE	FALSE	39	411	9.48905	Tnon_mito	ARC20|P20-ARC|P59998	ENSG00000241553
ARFGAP1	Isoform 2 of ADP-ribosylation factor GTPase-activating protein 1 OS=Homo sapiens GN=ARFGAP1	1	1	4			7300000	5500000	5800000	6700000	0	6325000	100	6.64386	0.000604957	3.21828	6250000	6400000	100	100	6.64386	6.64386	4	TRUE	FALSE	FALSE	24	411	5.83942	Tnon_mito	ARF1GAP|HRIHFB2281|Q8N6T3	ENSG00000101199
NCAPG	Condensin complex subunit 3 OS=Homo sapiens GN=NCAPG PE=1 SV=1	4	4	10		2500000	5200000	6500000	6600000	5900000	1250000	6050000	4.84	2.27501	0.143427	0.843369	6250000	5850000	5	4.68	2.32193	2.22651	4	FALSE	TRUE	TRUE	59	411	14.3552	Tnon_mito	CAPG|CHCG|NY-MEL-3|YCG1|Q9BPX3	ENSG00000109805
RPL13	60S ribosomal protein L13 OS=Homo sapiens GN=RPL13 PE=1 SV=4	4	4	43	70000000	64000000	67000000	55000000	72000000	75000000	67000000	67250000	1.00373	0.00537317	0.964881	0.0155263	73500000	61000000	1.09701	0.910448	0.133583	-0.135352	4	FALSE	TRUE	TRUE	218	411	53.0414	Tnon_mito	BBC1|D16S444E|D16S44E|L13|P26373	ENSG00000167526
RPL28	60S ribosomal protein L28 OS=Homo sapiens GN=RPL28 PE=2 SV=1	1	1	5	15000000		19000000	13000000	17000000	21000000	7500000	17500000	2.33333	1.22239	0.401661	0.39614	19000000	16000000	2.53333	2.13333	1.34104	1.09311	4	FALSE	FALSE	TRUE	109	411	26.5207	Tnon_mito	L28|P46779	ENSG00000108107
ATP2A2	Sarcoplasmic/endoplasmic reticulum calcium ATPase 2 OS=Homo sapiens GN=ATP2A2 PE=1 SV=1	8	8	17			7900000	6800000	8800000	10000000	0	8375000	100	6.64386	0.00114647	2.94064	9400000	7350000	100	100	6.64386	6.64386	4	TRUE	TRUE	TRUE	92	411	22.3844	Tnon_mito	ATP2B|DAR|DD|SERCA2|P16615	ENSG00000174437
SMC2	Structural maintenance of chromosomes protein 2 OS=Homo sapiens GN=SMC2 PE=1 SV=2	11	11	35		5200000	13000000	14000000	14000000	11000000	2600000	13000000	5	2.32193	0.135426	0.868299	12500000	13500000	4.80769	5.19231	2.26534	2.37638	4	FALSE	TRUE	TRUE	82	411	19.9513	Tnon_mito	CAP-E|CAPE|SMC-2|SMC2L1|O95347	ENSG00000136824
GEMIN2	Gem-associated protein 2 OS=Homo sapiens GN=GEMIN2 PE=1 SV=1	2	2	6	12000000	8400000		6400000	6200000	8200000	10200000	5200000	0.509804	-0.971986	0.144027	0.841555	7200000	3200000	0.705882	0.313725	-0.5025	-1.67243	3	FALSE	FALSE	TRUE	8	411	1.94647	Tnon_mito	SIP1|SIP1-delta|O14893	ENSG00000092208
PSMG1	Proteasome assembly chaperone 1 OS=Homo sapiens GN=PSMG1 PE=1 SV=1	1	1	1				2700000			0	675000	100	6.64386	0.391002	0.407821	0	1350000	0	100		6.64386	1	FALSE	FALSE	FALSE	18	411	4.37956	Tnon_mito	C21LRP|DSCR2|LRPC21|PAC-1|PAC1|O95456	ENSG00000183527
CLCC1	Chloride channel CLIC-like protein 1 OS=Homo sapiens GN=CLCC1 PE=1 SV=1	7	7	22		2700000	15000000	11000000	11000000	12000000	1350000	12250000	9.07407	3.18175	0.0205383	1.68744	11500000	13000000	8.51852	9.62963	3.0906	3.26748	4	TRUE	TRUE	TRUE	21	411	5.10949	Tnon_mito	MCLC|Q96S66	ENSG00000121940
NOSIP	Nitric oxide synthase-interacting protein OS=Homo sapiens GN=NOSIP PE=1 SV=1	1	1	1						3300000	0	825000	100	6.64386	0.391002	0.407821	1650000	0	100	0	6.64386		1	FALSE	FALSE	FALSE	12	411	2.91971	Tnon_mito	Q9Y314	ENSG00000142546
CINP	Isoform 3 of Cyclin-dependent kinase 2-interacting protein OS=Homo sapiens GN=CINP	1	1	1			10000000				0	2500000	100	6.64386	0.391002	0.407821	0	5000000	0	100		6.64386	1	FALSE	FALSE	FALSE	0	411	0	Tnon_mito	Q9BW66	ENSG00000100865
C7orf50	Uncharacterized protein C7orf50 OS=Homo sapiens GN=C7orf50 PE=1 SV=1	2	2	4	8400000	12000000				8800000	10200000	2200000	0.215686	-2.21299	0.0548944	1.26047	4400000	0	0.431373	0	-1.21299		1	FALSE	FALSE	FALSE	25	411	6.08273	Tnon_mito	YCR016W|Q9BRJ6	ENSG00000146540
ALG5	Dolichyl-phosphate beta-glucosyltransferase OS=Homo sapiens GN=ALG5 PE=1 SV=1	1	1	3			5900000			8000000	0	3475000	100	6.64386	0.188873	0.72383	4000000	2950000	100	100	6.64386	6.64386	2	FALSE	FALSE	FALSE	2	411	0.486618	Tnon_mito	RP11-421P11.2|bA421P11.2|Q9Y673	ENSG00000120697
TAGLN2	Transgelin-2 OS=Homo sapiens GN=TAGLN2 PE=1 SV=3	1	1	1					5300000		0	1325000	100	6.64386	0.391002	0.407821	2650000	0	100	0	6.64386		1	FALSE	FALSE	FALSE	156	411	37.9562	Tnon_mito	HA1756|P37802	ENSG00000158710
GBA	Glucosylceramidase OS=Homo sapiens GN=GBA PE=1 SV=3	6	6	14	12000000	14000000	15000000	12000000	11000000	12000000	13000000	12500000	0.961538	-0.0565835	0.734375	0.134082	11500000	13500000	0.884615	1.03846	-0.176878	0.0544478	4	FALSE	TRUE	TRUE	2	411	0.486618	Tnon_mito	GBA1|GCB|GLUC|P04062	ENSG00000177628
GSN	Gelsolin OS=Homo sapiens GN=GSN PE=1 SV=1	9	9	39	15000000	15000000	6500000	9600000	12000000	13000000	15000000	10275000	0.685	-0.545824	0.0468986	1.32884	12500000	8050000	0.833333	0.536667	-0.263034	-0.897902	4	TRUE	TRUE	TRUE	26	411	6.32603	Tnon_mito	ADF|AGEL|P06396	ENSG00000148180
KRT14	SWISS-PROT:P02533 Tax_Id=9606 Gene_Symbol=KRT14 Keratin, type I cytoskeletal 14	4	19	167	61000000	57000000	32000000	27000000	31000000	28000000	59000000	29500000	0.5	-1	0.00981088	2.00829	29500000	29500000	0.5	0.5	-1	-1	4	TRUE	TRUE	TRUE	284	411	69.0998	Tnon_mito	CK14|EBS3|EBS4|K14|NFJ|P02533	ENSG00000186847
MARCKS	Myristoylated alanine-rich C-kinase substrate OS=Homo sapiens GN=MARCKS PE=1 SV=4	10	10	152	200000000	190000000	200000000	180000000	200000000	210000000	195000000	197500000	1.01282	0.0183785	0.772745	0.111964	205000000	190000000	1.05128	0.974359	0.0721498	-0.0374747	4	FALSE	TRUE	TRUE	95	411	23.1144	Tnon_mito	80K-L|MACS|PKCSL|PRKCSL|P29966	ENSG00000155130
MFGE8	Lactadherin OS=Homo sapiens GN=MFGE8 PE=1 SV=2	2	2	2						5800000	0	1450000	100	6.64386	0.391002	0.407821	2900000	0	100	0	6.64386		1	FALSE	FALSE	FALSE	1	411	0.243309	Tnon_mito	BA46|EDIL1|HMFG|HsT19888|MFG-E8|MFGM|OAcGD3S|SED1|SPAG10|hP47|Q08431	ENSG00000140545
NHP2L1	NHP2-like protein 1 OS=Homo sapiens GN=NHP2L1 PE=2 SV=1	2	2	5	7500000	4400000		5800000	7200000	9100000	5950000	5525000	0.928571	-0.106915	0.874027	0.058475	8150000	2900000	1.36975	0.487395	0.45391	-1.03684	3	FALSE	FALSE	TRUE	59	411	14.3552	Tnon_mito	15.5K|FA-1|FA1|NHPX|OTK27|SNRNP15-5|SNU13|SPAG12|SSFA1|P55769	ENSG00000100138
PPP1CA	Isoform 2 of Serine/threonine-protein phosphatase PP1-alpha catalytic subunit OS=Homo sapiens GN=PPP1CA	3	7	19	11000000			4300000	6300000	10000000	5500000	5150000	0.936364	-0.0948592	0.960367	0.017563	8150000	2150000	1.48182	0.390909	0.567368	-1.35509	3	FALSE	TRUE	TRUE	123	411	29.927	Tnon_mito	PP-1A|PP1A|PP1alpha|PPP1A|P62136	ENSG00000172531
RPL29	60S ribosomal protein L29 OS=Homo sapiens GN=RPL29 PE=1 SV=2	1	1	12	62000000	70000000	73000000	54000000	71000000	72000000	66000000	67500000	1.02273	0.0324215	0.818138	0.0871734	71500000	63500000	1.08333	0.962121	0.115477	-0.0557094	4	FALSE	FALSE	TRUE	169	411	41.1192	Tnon_mito	HIP|HUMRPL29|L29|RPL29P10|RPL29_3_370|P47914	ENSG00000162244
RPL32	60S ribosomal protein L32 OS=Homo sapiens GN=RPL32 PE=2 SV=1	2	2	10	11000000	18000000	21000000	18000000	22000000	32000000	14500000	23250000	1.60345	0.681178	0.170038	0.769453	27000000	19500000	1.86207	1.34483	0.896907	0.427421	4	FALSE	FALSE	TRUE	72	411	17.5182	Tnon_mito	L32|P62910	ENSG00000144713
SKP1	S-phase kinase-associated protein 1 OS=Homo sapiens GN=SKP1 PE=1 SV=2	5	5	39	29000000	31000000	35000000	20000000	44000000	39000000	30000000	34500000	1.15	0.201634	0.45191	0.344948	41500000	27500000	1.38333	0.916667	0.468149	-0.125531	4	FALSE	TRUE	TRUE	145	411	35.2798	Tnon_mito	EMC19|OCP-II|OCP2|SKP1A|TCEB1L|p19A|P63208	ENSG00000113558
STX7	Syntaxin-7 OS=Homo sapiens GN=STX7 PE=1 SV=4	2	2	2				5100000	7000000		0	3025000	100	6.64386	0.189443	0.722522	3500000	2550000	100	100	6.64386	6.64386	2	FALSE	FALSE	FALSE	5	411	1.21655	Tnon_mito	O15400	ENSG00000079950
AP3B1	AP-3 complex subunit beta-1 OS=Homo sapiens GN=AP3B1 PE=1 SV=3	4	4	6			5800000	3600000	6400000	6400000	0	5550000	100	6.64386	0.00360949	2.44255	6400000	4700000	100	100	6.64386	6.64386	4	TRUE	TRUE	TRUE	41	411	9.97567	Tnon_mito	ADTB3|ADTB3A|HPS|HPS2|PE|O00203	ENSG00000132842
AP3D1	Isoform 5 of AP-3 complex subunit delta-1 OS=Homo sapiens GN=AP3D1	1	1	6	2900000		7900000	4000000	7400000		1450000	4825000	3.32759	1.73448	0.228189	0.641706	3700000	5950000	2.55172	4.10345	1.35147	2.03684	3	FALSE	FALSE	TRUE	73	411	17.7616	Tnon_mito	ADTD|hBLVR|O14617	ENSG00000065000
RTN3	Isoform 3 of Reticulon-3 OS=Homo sapiens GN=RTN3	3	3	28	47000000	56000000	67000000	91000000	69000000	65000000	51500000	73000000	1.41748	0.503324	0.0496709	1.3039	67000000	79000000	1.30097	1.53398	0.379589	0.61728	4	TRUE	TRUE	TRUE	10	411	2.43309	Tnon_mito	ASYIP|HAP|NSPL2|NSPLII|RTN3-A1|O95197	ENSG00000133318
RPL36	60S ribosomal protein L36 OS=Homo sapiens GN=RPL36 PE=1 SV=3	1	1	2		12000000			17000000		6000000	4250000	0.708333	-0.4975	0.833273	0.0792125	8500000	0	1.41667	0	0.5025		1	FALSE	FALSE	FALSE	93	411	22.6277	Tnon_mito	L36|Q9Y3U8	ENSG00000130255
AP3M1	AP-3 complex subunit mu-1 OS=Homo sapiens GN=AP3M1 PE=1 SV=1	1	1	1		9800000					4900000	0	0		0.5	0.30103	0	0	0	0			0	FALSE	FALSE	FALSE	14	411	3.40633	Tnon_mito	RP11-178G16.4|Q9Y2T2	ENSG00000185009
SCPEP1	Retinoid-inducible serine carboxypeptidase OS=Homo sapiens GN=SCPEP1 PE=1 SV=1	1	1	1				13000000			0	3250000	100	6.64386	0.391002	0.407821	0	6500000	0	100		6.64386	1	FALSE	FALSE	FALSE	2	411	0.486618	Tnon_mito	HSCP1|RISC|Q9HB40	ENSG00000121064
NPM1	Nucleophosmin OS=Homo sapiens GN=NPM1 PE=1 SV=2	5	5	77	30000000	48000000	32000000	31000000	44000000	53000000	39000000	40000000	1.02564	0.0365259	0.933467	0.029901	48500000	31500000	1.24359	0.807692	0.314511	-0.308122	4	FALSE	TRUE	TRUE	252	411	61.3139	Tnon_mito	B23|NPM|P06748	ENSG00000181163
TPD52L2	Isoform 7 of Tumor protein D54 OS=Homo sapiens GN=TPD52L2	4	4	22	11000000	18000000	19000000	20000000	21000000	22000000	14500000	20500000	1.41379	0.499571	0.328812	0.483052	21500000	19500000	1.48276	1.34483	0.568284	0.427421	4	FALSE	TRUE	TRUE	33	411	8.0292	Tnon_mito	D54|O43399	ENSG00000101150
NAPA	Alpha-soluble NSF attachment protein OS=Homo sapiens GN=NAPA PE=1 SV=3	6	6	24	13000000	10000000	11000000	13000000	15000000	14000000	11500000	13250000	1.15217	0.204358	0.433349	0.363162	14500000	12000000	1.26087	1.04348	0.334419	0.0614005	4	FALSE	TRUE	TRUE	3	411	0.729927	Tnon_mito	SNAPA|P54920	ENSG00000105402
TMEM109	Transmembrane protein 109 OS=Homo sapiens GN=TMEM109 PE=1 SV=1	2	2	12	15000000	25000000	38000000	28000000	29000000	38000000	20000000	33250000	1.6625	0.733354	0.172456	0.76332	33500000	33000000	1.675	1.65	0.744161	0.722466	4	FALSE	FALSE	TRUE	29	411	7.05596	Tnon_mito	Q9BVC6	ENSG00000110108
PSMD3	26S proteasome non-ATPase regulatory subunit 3 OS=Homo sapiens GN=PSMD3 PE=1 SV=2	16	16	95	25000000	21000000	43000000	36000000	46000000	44000000	23000000	42250000	1.83696	0.877317	0.00572646	2.24211	45000000	39500000	1.95652	1.71739	0.968291	0.780219	4	TRUE	TRUE	TRUE	111	411	27.0073	Tnon_mito	P58|RPN3|S3|TSTA2|O43242	ENSG00000108344
PSMD12	26S proteasome non-ATPase regulatory subunit 12 OS=Homo sapiens GN=PSMD12 PE=1 SV=3	12	12	59	15000000	12000000	17000000	19000000	18000000	22000000	13500000	19000000	1.40741	0.49304	0.0904786	1.04345	20000000	18000000	1.48148	1.33333	0.567041	0.415037	4	FALSE	TRUE	TRUE	97	411	23.601	Tnon_mito	Rpn5|p55|O00232	ENSG00000197170
PSMD13	26S proteasome non-ATPase regulatory subunit 13 OS=Homo sapiens GN=PSMD13 PE=1 SV=2	11	11	52	11000000	8900000	21000000	19000000	25000000	23000000	9950000	22000000	2.21106	1.14474	0.00292243	2.53426	24000000	20000000	2.41206	2.01005	1.27027	1.00723	4	TRUE	TRUE	TRUE	79	411	19.2214	Tnon_mito	HSPC027|Rpn9|S11|p40.5|Q9UNM6	ENSG00000185627
NAP1L4	Isoform 2 of Nucleosome assembly protein 1-like 4 OS=Homo sapiens GN=NAP1L4	7	8	53	15000000	13000000	26000000	24000000	23000000	27000000	14000000	25000000	1.78571	0.836501	0.00546964	2.26204	25000000	25000000	1.78571	1.78571	0.836501	0.836501	4	TRUE	TRUE	TRUE	90	411	21.8978	Tnon_mito	NAP1L4b|NAP2|NAP2L|hNAP2|Q99733	ENSG00000205531
BAG6	Isoform 3 of Large proline-rich protein BAG6 OS=Homo sapiens GN=BAG6	5	5	9			4500000	12000000	8300000	7600000	0	8100000	100	6.64386	0.01339	1.87322	7950000	8250000	100	100	6.64386	6.64386	4	TRUE	TRUE	TRUE	44	411	10.7056	Tnon_mito	BAG-6|BAT3|D6S52E|G3|P46379	ENSG00000096155
DHDDS	Isoform 2 of Dehydrodolichyl diphosphate synthase OS=Homo sapiens GN=DHDDS	1	1	2					3000000	3900000	0	1725000	100	6.64386	0.18706	0.72802	3450000	0	100	0	6.64386		2	FALSE	FALSE	FALSE	0	411	0	Tnon_mito	CIT|CPT|DS|HDS|RP59|Q86SQ9	ENSG00000117682
IL11	Interleukin-11 OS=Homo sapiens GN=IL11 PE=1 SV=1	1	1	2			18000000		12000000		0	7500000	100	6.64386	0.194171	0.711815	6000000	9000000	100	100	6.64386	6.64386	2	FALSE	FALSE	FALSE	0	411	0	Tnon_mito	AGIF|IL-11|P20809	ENSG00000095752
TCOF1	Treacle protein OS=Homo sapiens GN=TCOF1 PE=2 SV=1	8	8	38	11000000	9600000	12000000	10000000	14000000	11000000	10300000	11750000	1.14078	0.190016	0.267314	0.572978	12500000	11000000	1.21359	1.06796	0.279284	0.0948592	4	FALSE	TRUE	TRUE	103	411	25.0608	Tnon_mito	MFD1|TCS1|treacle|Q13428	ENSG00000070814
IRS4	Insulin receptor substrate 4 OS=Homo sapiens GN=IRS4 PE=1 SV=1	16	16	79	17000000	18000000	31000000	31000000	35000000	38000000	17500000	33750000	1.92857	0.947533	0.00151061	2.82085	36500000	31000000	2.08571	1.77143	1.06054	0.824913	4	TRUE	TRUE	TRUE	152	411	36.983	Tnon_mito	IRS-4|PY160|O14654	ENSG00000133124
SCFD1	Sec1 family domain-containing protein 1 OS=Homo sapiens GN=SCFD1 PE=1 SV=4	5	5	20	9400000	9700000	11000000	9000000	11000000	13000000	9550000	11000000	1.15183	0.203931	0.173406	0.760936	12000000	10000000	1.25654	1.04712	0.329462	0.0664274	4	FALSE	TRUE	TRUE	17	411	4.13625	Tnon_mito	C14orf163|RA410|SLY1|SLY1P|STXBP1L2|Q8WVM8	ENSG00000092108
SLAIN1	SLAIN motif-containing protein 1 OS=Homo sapiens GN=SLAIN1 PE=1 SV=3	4	4	6	2400000				5800000	9700000	1200000	3875000	3.22917	1.69116	0.3722	0.429224	7750000	0	6.45833	0	2.69116		2	FALSE	TRUE	TRUE	0	411	0	Tnon_mito	C13orf32|Q8ND83	ENSG00000139737
LAMP1	Lysosome-associated membrane glycoprotein 1 OS=Homo sapiens GN=LAMP1 PE=1 SV=3	3	3	31	21000000	22000000	40000000	38000000	37000000	42000000	21500000	39250000	1.82558	0.868356	0.00015968	3.79675	39500000	39000000	1.83721	1.81395	0.877516	0.859137	4	TRUE	TRUE	TRUE	15	411	3.64964	Tnon_mito	CD107a|LAMPA|LGP120|P11279	ENSG00000185896
CAPZB	Isoform 2 of F-actin-capping protein subunit beta OS=Homo sapiens GN=CAPZB	8	8	51	40000000	35000000	28000000	28000000	30000000	28000000	37500000	28500000	0.76	-0.395929	0.160763	0.793813	29000000	28000000	0.773333	0.746667	-0.370838	-0.421464	4	FALSE	TRUE	TRUE	115	411	27.9805	Tnon_mito	CAPB|CAPPB|CAPZ|P47756	ENSG00000077549
DYNC1I2	Cytoplasmic dynein 1 intermediate chain 2 OS=Homo sapiens GN=DYNC1I2 PE=2 SV=1	3	3	17	11000000	8400000	21000000	17000000	18000000	21000000	9700000	19250000	1.98454	0.988802	0.0198097	1.70312	19500000	19000000	2.01031	1.95876	1.00742	0.969943	4	TRUE	TRUE	TRUE	66	411	16.0584	Tnon_mito	DNCI2|IC2|Q13409	ENSG00000077380
RBBP4	Histone-binding protein RBBP4 OS=Homo sapiens GN=RBBP4 PE=1 SV=3	6	10	64	41000000	40000000	30000000	32000000	39000000	40000000	40500000	35250000	0.87037	-0.200299	0.12467	0.90424	39500000	31000000	0.975309	0.765432	-0.0360693	-0.385654	4	FALSE	TRUE	TRUE	148	411	36.0097	Tnon_mito	NURF55|RBAP48|Q09028	ENSG00000162521
RCN2	Reticulocalbin-2 OS=Homo sapiens GN=RCN2 PE=2 SV=1	6	6	21	6900000	8300000	12000000	11000000	6300000	8000000	7600000	9325000	1.22697	0.295104	0.312528	0.505111	7150000	11500000	0.940789	1.51316	-0.0880562	0.597563	4	FALSE	TRUE	TRUE	126	411	30.6569	Tmito	E6BP|ERC-55|ERC55|TCBP49|Q14257	ENSG00000117906
SMARCE1	SWI/SNF-related matrix-associated actin-dependent regulator of chromatin subfamily E member 1 OS=Homo sapiens GN=SMARCE1 PE=1 SV=2	1	1	2	1400000				7600000		700000	1900000	2.71429	1.44057	0.588022	0.230607	3800000	0	5.42857	0	2.44057		1	FALSE	FALSE	FALSE	55	411	13.382	Tnon_mito	BAF57|Q969G3	ENSG00000073584
SSB	Lupus La protein OS=Homo sapiens GN=SSB PE=1 SV=2	6	6	17	9400000	11000000	9600000	6500000	5300000	5800000	10200000	6800000	0.666667	-0.584963	0.0610822	1.21409	5550000	8050000	0.544118	0.789216	-0.878009	-0.341508	4	FALSE	TRUE	TRUE	102	411	24.8175	Tnon_mito	LARP3|La|P05455	ENSG00000138385
SSRP1	FACT complex subunit SSRP1 OS=Homo sapiens GN=SSRP1 PE=1 SV=1	2	2	6			3900000		6000000	6000000	0	3975000	100	6.64386	0.0672755	1.17214	6000000	1950000	100	100	6.64386	6.64386	3	FALSE	FALSE	TRUE	73	411	17.7616	Tnon_mito	FACT|FACT80|T160|Q08945	ENSG00000149136
FUBP1	Far upstream element-binding protein 1 OS=Homo sapiens GN=FUBP1 PE=2 SV=1	5	6	27	7400000	6600000	15000000	9700000	7300000	11000000	7000000	10750000	1.53571	0.61891	0.0998429	1.00068	9150000	12350000	1.30714	1.76429	0.386417	0.819084	4	FALSE	TRUE	TRUE	55	411	13.382	Tnon_mito	FBP|FUBP|Q96AE4	ENSG00000162613
BUB3	Mitotic checkpoint protein BUB3 OS=Homo sapiens GN=BUB3 PE=1 SV=1	5	5	14	11000000	8500000	11000000	7700000	11000000	12000000	9750000	10425000	1.06923	0.0965733	0.704364	0.152203	11500000	9350000	1.17949	0.958974	0.23816	-0.0604359	4	FALSE	TRUE	TRUE	112	411	27.2506	Tnon_mito	BUB3L|hBUB3|O43684	ENSG00000154473
SNRNP40	U5 small nuclear ribonucleoprotein 40 kDa protein OS=Homo sapiens GN=SNRNP40 PE=2 SV=1	3	3	6	10000000	8700000		7400000			9350000	1850000	0.197861	-2.33744	0.0224565	1.64866	0	3700000	0	0.395722		-1.33744	1	TRUE	TRUE	TRUE	71	411	17.2749	Tnon_mito	40K|HPRP8BP|PRP8BP|PRPF8BP|RP11-490K7.3|SPF38|WDR57|Q96DI7	ENSG00000060688
ILVBL	Acetolactate synthase-like protein OS=Homo sapiens GN=ILVBL PE=1 SV=2	2	2	3			5600000	4700000		7200000	0	4375000	100	6.64386	0.0663202	1.17835	3600000	5150000	100	100	6.64386	6.64386	3	FALSE	FALSE	FALSE	9	411	2.18978	Tnon_mito	209L8|AHAS|ILV2H|A1L0T0	ENSG00000105135
STK38L	Serine/threonine-protein kinase 38-like OS=Homo sapiens GN=STK38L PE=1 SV=3	8	12	59	34000000	29000000	30000000	35000000	35000000	34000000	31500000	33500000	1.06349	0.0888093	0.56696	0.246448	34500000	32500000	1.09524	1.03175	0.131245	0.0450879	4	FALSE	TRUE	TRUE	118	411	28.7105	Tnon_mito	NDR2|Q9Y2H1	ENSG00000211455
TAB2	TGF-beta-activated kinase 1 and MAP3K7-binding protein 2 OS=Homo sapiens GN=TAB2 PE=1 SV=1	3	3	21	7600000	8000000	8900000	9000000	9100000	8800000	7800000	8950000	1.14744	0.198414	0.0840017	1.07571	8950000	8950000	1.14744	1.14744	0.198414	0.198414	4	FALSE	TRUE	TRUE	10	411	2.43309	Tnon_mito	CHTD2|MAP3K7IP2|Q9NYJ8	ENSG00000055208
USP22	Ubiquitin carboxyl-terminal hydrolase 22 OS=Homo sapiens GN=USP22 PE=1 SV=2	1	1	3			4300000	4700000		5400000	0	3600000	100	6.64386	0.0601414	1.22083	2700000	4500000	100	100	6.64386	6.64386	3	FALSE	FALSE	FALSE	6	411	1.45985	Tnon_mito	USP3L|Q9UPT9	ENSG00000124422
PABPC1	Polyadenylate-binding protein 1 OS=Homo sapiens GN=PABPC1 PE=1 SV=2	15	21	207	110000000	170000000	110000000	110000000	130000000	110000000	140000000	115000000	0.821429	-0.283793	0.556013	0.254915	120000000	110000000	0.857143	0.785714	-0.222392	-0.347923	4	FALSE	TRUE	TRUE	172	411	41.8491	Tnon_mito	PAB1|PABP|PABP1|PABPC2|PABPL1|P11940	ENSG00000070756
CYP11B1	CYP11B1 protein OS=Homo sapiens GN=CYP11B1 PE=2 SV=1	1	1	1					2600000		0	650000	100	6.64386	0.391002	0.407821	1300000	0	100	0	6.64386		1	FALSE	FALSE	FALSE	0	411	0	Tpossible_mito	CPN1|CYP11B|FHI|P450C11|P15538	ENSG00000160882
RDX	Isoform 5 of Radixin OS=Homo sapiens GN=RDX	1	1	3		7200000			9700000	9300000	3600000	4750000	1.31944	0.399931	0.820838	0.0857425	9500000	0	2.63889	0	1.39993		2	FALSE	FALSE	FALSE	78	411	18.9781	Tnon_mito	DFNB24|P35241	ENSG00000137710
CACYBP	Calcyclin-binding protein OS=Homo sapiens GN=CACYBP PE=1 SV=2	4	4	18	8000000	9000000	13000000	13000000	14000000	16000000	8500000	14000000	1.64706	0.719892	0.00355965	2.44859	15000000	13000000	1.76471	1.52941	0.819428	0.612977	4	TRUE	TRUE	TRUE	67	411	16.3017	Tnon_mito	GIG5|RP1-102G20.6|S100A6BP|SIP|Q9HB71	ENSG00000116161
GOLGA3	Golgin subfamily A member 3 OS=Homo sapiens GN=GOLGA3 PE=1 SV=2	5	5	9	3100000	2900000	3700000		4100000	3700000	3000000	2875000	0.958333	-0.0614005	0.905279	0.0432177	3900000	1850000	1.3	0.616667	0.378512	-0.697437	3	FALSE	TRUE	TRUE	23	411	5.59611	Tnon_mito	GCP170|MEA-2|Q08378	ENSG00000090615
SNRPA1	U2 small nuclear ribonucleoprotein A' OS=Homo sapiens GN=SNRPA1 PE=1 SV=2	9	9	74	57000000	50000000	42000000	40000000	41000000	44000000	53500000	41750000	0.780374	-0.357763	0.167405	0.776231	42500000	41000000	0.794393	0.766355	-0.332076	-0.383915	4	FALSE	TRUE	TRUE	120	411	29.1971	Tnon_mito	Lea1|P09661	ENSG00000131876
MTDH	Protein LYRIC OS=Homo sapiens GN=MTDH PE=1 SV=2	3	3	23	7400000	6200000	4800000	6200000	5100000	5800000	6800000	5475000	0.805147	-0.312676	0.220897	0.65581	5450000	5500000	0.801471	0.808824	-0.319279	-0.306103	4	FALSE	TRUE	TRUE	50	411	12.1655	Tnon_mito	3D3|AEG-1|AEG1|LYRIC|LYRIC/3D3|Q86UE4	ENSG00000147649
BOD1L1	Biorientation of chromosomes in cell division protein 1-like 1 OS=Homo sapiens GN=BOD1L1 PE=1 SV=2	1	1	1						6300000	0	1575000	100	6.64386	0.391002	0.407821	3150000	0	100	0	6.64386		1	FALSE	FALSE	FALSE	37	411	9.00243	Tnon_mito	BOD1L|FAM44A|Q8NFC6	ENSG00000038219
SBSN	Suprabasin OS=Homo sapiens GN=SBSN PE=2 SV=2	1	1	3			2300000	1200000		1200000	0	1175000	100	6.64386	0.0875863	1.05756	600000	1750000	100	100	6.64386	6.64386	3	FALSE	FALSE	FALSE	41	411	9.97567	Tnon_mito	UNQ698|Q6UWP8	ENSG00000189001
GTF3C5	Isoform 3 of General transcription factor 3C polypeptide 5 OS=Homo sapiens GN=GTF3C5	1	1	4			2700000	3900000	2600000	3700000	0	3225000	100	6.64386	0.00238109	2.62322	3150000	3300000	100	100	6.64386	6.64386	4	TRUE	FALSE	FALSE	41	411	9.97567	Tnon_mito	TFIIIC63|TFIIICepsilon|TFiiiC2-63|Q9Y5Q8	ENSG00000148308
VIM	Vimentin OS=Homo sapiens GN=VIM PE=1 SV=4	11	11	38	9800000	11000000	18000000	16000000	18000000	18000000	10400000	17500000	1.68269	0.750771	0.00582693	2.23456	18000000	17000000	1.73077	1.63462	0.791413	0.708951	4	TRUE	TRUE	TRUE	257	411	62.5304	Tnon_mito	CTRCT30|HEL113|P08670	ENSG00000026025
CCNT2	Cyclin-T2 OS=Homo sapiens GN=CCNT2 PE=1 SV=2	1	1	1	3600000						1800000	0	0		0.5	0.30103	0	0	0	0			0	FALSE	FALSE	FALSE	8	411	1.94647	Tnon_mito	CYCT2|O60583	ENSG00000082258
DBN1	Isoform 3 of Drebrin OS=Homo sapiens GN=DBN1	12	12	62	74000000	74000000	36000000	35000000	35000000	36000000	74000000	35500000	0.47973	-1.05971	9.29456e-07	6.03177	35500000	35500000	0.47973	0.47973	-1.05971	-1.05971	4	TRUE	TRUE	TRUE	87	411	21.1679	Tnon_mito	D0S117E|Q16643	ENSG00000113758
DGCR14	Protein DGCR14 OS=Homo sapiens GN=DGCR14 PE=1 SV=1	1	1	2				3000000		3400000	0	1600000	100	6.64386	0.182931	0.737712	1700000	1500000	100	100	6.64386	6.64386	2	FALSE	FALSE	FALSE	12	411	2.91971	Tnon_mito	DGCR13|DGS-H|DGS-I|DGSH|DGSI|ES2|Es2el|Q96DF8	ENSG00000100056
ELMOD2	ELMO domain-containing protein 2 OS=Homo sapiens GN=ELMOD2 PE=1 SV=1	3	3	14	7500000	6900000	15000000	15000000	11000000	15000000	7200000	14000000	1.94444	0.959358	0.00459187	2.33801	13000000	15000000	1.80556	2.08333	0.852443	1.05889	4	TRUE	TRUE	TRUE	1	411	0.243309	Tnon_mito	9830169G11Rik|Q8IZ81	ENSG00000179387
RPL19	60S ribosomal protein L19 OS=Homo sapiens GN=RPL19 PE=1 SV=1	2	2	12	22000000	34000000	40000000	28000000	30000000	29000000	28000000	31750000	1.13393	0.18133	0.645732	0.189948	29500000	34000000	1.05357	1.21429	0.0752881	0.280108	4	FALSE	FALSE	TRUE	210	411	51.0949	Tnon_mito	L19|P84098	ENSG00000108298
RPS28	40S ribosomal protein S28 OS=Homo sapiens GN=RPS28 PE=1 SV=1	2	2	48	270000000	240000000	160000000	180000000	200000000	210000000	255000000	187500000	0.735294	-0.443607	0.0604555	1.21856	205000000	170000000	0.803922	0.666667	-0.314873	-0.584963	4	FALSE	FALSE	TRUE	182	411	44.2822	Tnon_mito	S28|P62857	ENSG00000233927
RPL14	60S ribosomal protein L14 OS=Homo sapiens GN=RPL14 PE=1 SV=4	2	2	18	13000000	17000000	14000000	14000000	18000000	20000000	15000000	16500000	1.1	0.137504	0.604329	0.218726	19000000	14000000	1.26667	0.933333	0.341037	-0.0995357	4	FALSE	FALSE	TRUE	156	411	37.9562	Tnon_mito	CAG-ISL-7|CTG-B33|L14|RL14|hRL14|P50914	ENSG00000188846
HSPA1A	Heat shock 70 kDa protein 1A/1B OS=Homo sapiens GN=HSPA1A PE=1 SV=5	26	28	752	1200000000	1200000000	1800000000	1700000000	2100000000	2100000000	1200000000	1925000000	1.60417	0.681824	0.00590494	2.22878	2100000000	1750000000	1.75	1.45833	0.807355	0.544321	4	TRUE	TRUE	TRUE	395	411	96.1071	Tpossible_mito	HEL-S-103|HSP70-1|HSP70-1A|HSP70I|HSP72|HSPA1|B3KTT5	ENSG00000204388
BOLA2	BolA-like protein 2 OS=Homo sapiens GN=BOLA2 PE=1 SV=1	2	2	11	8900000	12000000	12000000	9500000	16000000	15000000	10450000	13125000	1.25598	0.328814	0.304147	0.516916	15500000	10750000	1.48325	1.02871	0.568765	0.0408337	4	FALSE	FALSE	TRUE	72	411	17.5182	Tnon_mito	BOLA2A|My016	ENSG00000157106
LAMC1	Laminin subunit gamma-1 OS=Homo sapiens GN=LAMC1 PE=1 SV=3	1	1	1				1800000			0	450000	100	6.64386	0.391002	0.407821	0	900000	0	100		6.64386	1	FALSE	FALSE	FALSE	14	411	3.40633	Tmito	LAMB2|P11047	ENSG00000135862
ESYT1	Isoform 2 of Extended synaptotagmin-1 OS=Homo sapiens GN=ESYT1	5	5	13			4400000	5000000	5200000	3600000	0	4550000	100	6.64386	0.0010629	2.97351	4400000	4700000	100	100	6.64386	6.64386	4	TRUE	TRUE	TRUE	53	411	12.8954	Tnon_mito	FAM62A|MBC2|Q9BSJ8	ENSG00000139641
TMED9	Transmembrane emp24 domain-containing protein 9 OS=Homo sapiens GN=TMED9 PE=1 SV=2	2	2	9		5000000	14000000	14000000	17000000	14000000	2500000	14750000	5.9	2.56071	0.104522	0.980792	15500000	14000000	6.2	5.6	2.63227	2.48543	4	FALSE	FALSE	TRUE	11	411	2.6764	Tnon_mito	GMP25|HSGP25L2G|p25|Q9BVK6	ENSG00000184840
TPP1	Tripeptidyl-peptidase 1 OS=Homo sapiens GN=TPP1 PE=1 SV=2	5	5	29	25000000	21000000	26000000	27000000	28000000	25000000	23000000	26500000	1.15217	0.204358	0.310237	0.508306	26500000	26500000	1.15217	1.15217	0.204358	0.204358	4	FALSE	TRUE	TRUE	4	411	0.973236	Tpossible_mito	CLN2|LPIC|SCAR7|TPP-1|O14773	ENSG00000166340
FAM98B	Isoform 2 of Protein FAM98B OS=Homo sapiens GN=FAM98B	8	10	59	29000000	24000000	20000000	17000000	29000000	27000000	26500000	23250000	0.877358	-0.188762	0.447041	0.349652	28000000	18500000	1.0566	0.698113	0.0794345	-0.518467	4	FALSE	TRUE	TRUE	54	411	13.1387	Tnon_mito	Q52LJ0	ENSG00000171262
ADD1	Isoform 3 of Alpha-adducin OS=Homo sapiens GN=ADD1	4	4	11	9400000	10000000	7200000	7700000	9700000	5400000	9700000	7500000	0.773196	-0.371094	0.0854555	1.06826	7550000	7450000	0.778351	0.768041	-0.361508	-0.380744	4	FALSE	TRUE	TRUE	42	411	10.219	Tnon_mito	ADDA|P35611	ENSG00000087274
SLC1A3	Excitatory amino acid transporter 1 OS=Homo sapiens GN=SLC1A3 PE=1 SV=1	1	1	1						1700000	0	425000	100	6.64386	0.391002	0.407821	850000	0	100	0	6.64386		1	FALSE	FALSE	FALSE	7	411	1.70316	Tpossible_mito	EA6|EAAT1|GLAST|GLAST1|P43003	ENSG00000079215
PARP1	Poly [ADP-ribose] polymerase 1 OS=Homo sapiens GN=PARP1 PE=1 SV=4	11	11	30	19000000	14000000	11000000	10000000	13000000	12000000	16500000	11500000	0.69697	-0.520832	0.279659	0.553371	12500000	10500000	0.757576	0.636364	-0.400538	-0.652077	4	FALSE	TRUE	TRUE	182	411	44.2822	Tpossible_mito	ADPRT|ADPRT 1|ADPRT1|ARTD1|PARP|PARP-1|PPOL|pADPRT-1|P09874	ENSG00000143799
CDK4	Cyclin-dependent kinase 4 OS=Homo sapiens GN=CDK4 PE=1 SV=2	1	2	12				9900000	11000000		0	5225000	100	6.64386	0.182571	0.738569	5500000	4950000	100	100	6.64386	6.64386	2	FALSE	FALSE	TRUE	27	411	6.56934	Tnon_mito	CMM3|PSK-J3|P11802	ENSG00000135446
CDK9	Isoform 2 of Cyclin-dependent kinase 9 OS=Homo sapiens GN=CDK9	1	2	11		2600000					1300000	0	0		0.5	0.30103	0	0	0	0			0	FALSE	FALSE	TRUE	47	411	11.4355	Tnon_mito	C-2k|CDC2L4|CTK1|PITALRE|TAK|P50750	ENSG00000136807
CSNK1A1	Casein kinase I isoform alpha OS=Homo sapiens GN=CSNK1A1 PE=1 SV=2	1	1	3		3700000		4600000		5200000	1850000	2450000	1.32432	0.405256	0.818494	0.0869843	2600000	2300000	1.40541	1.24324	0.490986	0.314109	2	FALSE	FALSE	FALSE	20	411	4.86618	Tnon_mito	CK1|CK1a|CKIa|HEL-S-77p|HLCDGP1|PRO2975|P48729	ENSG00000113712
CYP51A1	Lanosterol 14-alpha demethylase OS=Homo sapiens GN=CYP51A1 PE=1 SV=3	6	6	27	11000000	5900000	10000000	11000000	15000000	13000000	8450000	12250000	1.4497	0.535759	0.350777	0.454969	14000000	10500000	1.6568	1.2426	0.728404	0.313366	4	FALSE	TRUE	TRUE	8	411	1.94647	Tnon_mito	CP51|CYP51|CYPL1|LDM|P450-14DM|P450L1|Q16850	ENSG00000001630
DNA2	DNA replication ATP-dependent helicase/nuclease DNA2 OS=Homo sapiens GN=DNA2 PE=2 SV=1	14	19	69			18000000	19000000	19000000	20000000	0	19000000	100	6.64386	2.18405e-05	4.66074	19500000	18500000	100	100	6.64386	6.64386	4	TRUE	TRUE	TRUE	1	411	0.243309	Tmito	DNA2L|PEOA6|hDNA2|P51530	ENSG00000138346
DNA2	DNA replication ATP-dependent helicase/nuclease DNA2 (Fragment) OS=Homo sapiens GN=DNA2 PE=4 SV=1	1	6	19	14000000000	90000000000	15000000000	21000000000			52000000000	9000000000	0.173077	-2.53051	0.458241	0.338906	0	18000000000	0	0.346154		-1.53051	2	FALSE	FALSE	TRUE	1	411	0.243309	Tmito	DNA2L|PEOA6|hDNA2|P51530	ENSG00000138346
EIF2S1	Eukaryotic translation initiation factor 2 subunit 1 OS=Homo sapiens GN=EIF2S1 PE=1 SV=3	13	13	52	32000000	27000000	29000000	25000000	36000000	31000000	29500000	30250000	1.02542	0.0362202	0.84029	0.0755707	33500000	27000000	1.13559	0.915254	0.183446	-0.127756	4	FALSE	TRUE	TRUE	101	411	24.5742	Tnon_mito	EIF-2|EIF-2A|EIF-2alpha|EIF2|EIF2A|P05198	ENSG00000134001
FBL	rRNA 2'-O-methyltransferase fibrillarin OS=Homo sapiens GN=FBL PE=1 SV=2	4	4	23	12000000	47000000	13000000	11000000	16000000	15000000	29500000	13750000	0.466102	-1.10128	0.533145	0.273154	15500000	12000000	0.525424	0.40678	-0.928447	-1.29768	4	FALSE	TRUE	TRUE	161	411	39.1727	Tnon_mito	FIB|FLRN|RNU3IP1|P22087	ENSG00000105202
EWSR1	Isoform 5 of RNA-binding protein EWS OS=Homo sapiens GN=EWSR1	8	8	120	570000000	430000000	360000000	330000000	420000000	440000000	500000000	387500000	0.775	-0.367732	0.331928	0.478957	430000000	345000000	0.86	0.69	-0.217591	-0.535332	4	FALSE	TRUE	TRUE	143	411	34.7932	Tnon_mito	EWS|bK984G1.4|Q01844	ENSG00000182944
FUS	RNA-binding protein FUS OS=Homo sapiens GN=FUS PE=1 SV=1	6	6	78	190000000	180000000	170000000	130000000	180000000	180000000	185000000	165000000	0.891892	-0.165059	0.199991	0.698989	180000000	150000000	0.972973	0.810811	-0.0395284	-0.302563	4	FALSE	TRUE	TRUE	188	411	45.7421	Tnon_mito	ALS6|ETM4|FUS1|HNRNPP2|POMP75|TLS|P35637	ENSG00000089280
HMGB1	High mobility group protein B1 OS=Homo sapiens GN=HMGB1 PE=1 SV=3	1	1	4	8500000	6700000	7200000	6000000			7600000	3300000	0.434211	-1.20353	0.114425	0.941479	0	6600000	0	0.868421		-0.203533	2	FALSE	FALSE	FALSE	106	411	25.7908	Tnon_mito	HMG1|HMG3|SBP-1|P09429	ENSG00000189403
HNRNPA1	Heterogeneous nuclear ribonucleoprotein A1 OS=Homo sapiens GN=HNRNPA1 PE=1 SV=5	9	9	134	150000000	180000000	150000000	160000000	170000000	180000000	165000000	165000000	1	0	1	0	175000000	155000000	1.06061	0.939394	0.0848889	-0.0901978	4	FALSE	TRUE	TRUE	268	411	65.2068	Tnon_mito	ALS19|ALS20|HNRPA1|HNRPA1L3|IBMPFD3|hnRNP A1|hnRNP-A1|P09651	ENSG00000135486
HNRNPA2B1	Heterogeneous nuclear ribonucleoproteins A2/B1 OS=Homo sapiens GN=HNRNPA2B1 PE=1 SV=2	10	10	66	70000000	76000000	62000000	61000000	76000000	69000000	73000000	67000000	0.917808	-0.123735	0.272648	0.564397	72500000	61500000	0.993151	0.842466	-0.00991547	-0.24731	4	FALSE	TRUE	TRUE	262	411	63.747	Tnon_mito	HNRNPA2|HNRNPB1|HNRPA2|HNRPA2B1|HNRPB1|IBMPFD2|RNPA2|SNRPB1|P22626	ENSG00000122566
HNRNPAB	Isoform 2 of Heterogeneous nuclear ribonucleoprotein A/B OS=Homo sapiens GN=HNRNPAB	9	10	92	70000000	65000000	62000000	71000000	71000000	78000000	67500000	70500000	1.04444	0.0627358	0.509939	0.292482	74500000	66500000	1.1037	0.985185	0.142353	-0.0215332	4	FALSE	TRUE	TRUE	206	411	50.1217	Tnon_mito	ABBP1|HNRPAB|Q99729	ENSG00000197451
HNRNPC	Heterogeneous nuclear ribonucleoproteins C1/C2 OS=Homo sapiens GN=HNRNPC PE=1 SV=4	4	4	22	21000000	21000000	14000000	13000000	14000000	16000000	21000000	14250000	0.678571	-0.559427	0.00173145	2.76159	15000000	13500000	0.714286	0.642857	-0.485427	-0.63743	4	TRUE	TRUE	TRUE	180	411	43.7956	Tnon_mito	C1|C2|HNRNP|HNRPC|SNRPC|P07910	ENSG00000092199
HNRNPD	Heterogeneous nuclear ribonucleoprotein D0 OS=Homo sapiens GN=HNRNPD PE=1 SV=1	6	8	90	110000000	100000000	100000000	100000000	120000000	130000000	105000000	112500000	1.07143	0.0995357	0.452946	0.343953	125000000	100000000	1.19048	0.952381	0.251539	-0.0703893	4	FALSE	TRUE	TRUE	216	411	52.5547	Tnon_mito	AUF1|AUF1A|HNRPD|P37|hnRNPD0|Q14103	ENSG00000138668
HNRNPF	Heterogeneous nuclear ribonucleoprotein F OS=Homo sapiens GN=HNRNPF PE=1 SV=3	2	4	27	11000000	10000000		6500000			10500000	1625000	0.154762	-2.69188	0.00920264	2.03609	0	3250000	0	0.309524		-1.69188	1	TRUE	FALSE	TRUE	243	411	59.1241	Tnon_mito	HNRPF|OK/SW-cl.23|mcs94-1|P52597	ENSG00000169813
HNRNPH1	Heterogeneous nuclear ribonucleoprotein H OS=Homo sapiens GN=HNRNPH1 PE=2 SV=1	9	14	116	88000000	60000000	60000000	54000000	63000000	80000000	74000000	64250000	0.868243	-0.203829	0.611088	0.213896	71500000	57000000	0.966216	0.77027	-0.049582	-0.376563	4	FALSE	TRUE	TRUE	263	411	63.9903	Tnon_mito	HNRPH|HNRPH1|hnRNPH|P31943	ENSG00000169045
HNRNPH2	Heterogeneous nuclear ribonucleoprotein H2 OS=Homo sapiens GN=HNRNPH2 PE=1 SV=1	1	5	47	19000000	23000000					21000000	0	0		0.0604481	1.21862	0	0	0	0			0	FALSE	FALSE	TRUE	266	411	64.7202	Tnon_mito	FTP3|HNRPH'|HNRPH2|hnRNPH'|P55795	ENSG00000126945
IMPDH2	Inosine-5'-monophosphate dehydrogenase 2 OS=Homo sapiens GN=IMPDH2 PE=1 SV=2	4	4	15	6700000	7900000	9600000	9100000	10000000	9000000	7300000	9425000	1.2911	0.368596	0.137839	0.860629	9500000	9350000	1.30137	1.28082	0.380031	0.35707	4	FALSE	TRUE	TRUE	83	411	20.1946	Tnon_mito	IMPD2|IMPDH-II|P12268	ENSG00000178035
KLC1	Kinesin light chain 1 OS=Homo sapiens GN=KLC1 PE=4 SV=1	2	5	14			2500000	3700000	3800000	3800000	0	3450000	100	6.64386	0.00166852	2.77767	3800000	3100000	100	100	6.64386	6.64386	4	TRUE	FALSE	TRUE	60	411	14.5985	Tnon_mito	KLC|KNS2|KNS2A|RP11-73M18.7|RP11-73M18.8|Q07866	ENSG00000126214
KIF11	Kinesin-like protein KIF11 OS=Homo sapiens GN=KIF11 PE=1 SV=2	54	54	841	810000000	740000000	840000000	920000000	900000000	880000000	775000000	885000000	1.14194	0.191481	0.144294	0.840751	890000000	880000000	1.14839	1.13548	0.199609	0.183307	4	FALSE	TRUE	TRUE	163	411	39.6594	Tnon_mito	EG5|HKSP|KNSL1|MCLMR|TRIP5|P52732	ENSG00000138160
MCM2	DNA replication licensing factor MCM2 OS=Homo sapiens GN=MCM2 PE=1 SV=4	2	2	3			6700000			4500000	0	2800000	100	6.64386	0.193738	0.712785	2250000	3350000	100	100	6.64386	6.64386	2	FALSE	FALSE	FALSE	95	411	23.1144	Tnon_mito	BM28|CCNL1|CDCL1|D3S3194|MITOTIN|cdc19|P49736	ENSG00000073111
MCM7	DNA replication licensing factor MCM7 OS=Homo sapiens GN=MCM7 PE=1 SV=4	1	1	1					5100000		0	1275000	100	6.64386	0.391002	0.407821	2550000	0	100	0	6.64386		1	FALSE	FALSE	FALSE	123	411	29.927	Tnon_mito	CDC47|MCM2|P1.1-MCM3|P1CDC47|P85MCM|PNAS146|P33993	ENSG00000166508
HNRNPM	Heterogeneous nuclear ribonucleoprotein M OS=Homo sapiens GN=HNRNPM PE=1 SV=3	8	8	43	14000000	13000000	14000000	15000000	21000000	17000000	13500000	16750000	1.24074	0.311202	0.125433	0.901587	19000000	14500000	1.40741	1.07407	0.49304	0.103093	4	FALSE	TRUE	TRUE	220	411	53.528	Tnon_mito	CEAR|HNRNPM4|HNRPM|HNRPM4|HTGR1|NAGR1|hnRNP M|P52272	ENSG00000099783
NASP	Nuclear autoantigenic sperm protein OS=Homo sapiens GN=NASP PE=1 SV=2	16	16	59	18000000	13000000	26000000	27000000	29000000	31000000	15500000	28250000	1.82258	0.865983	0.079766	1.09818	30000000	26500000	1.93548	1.70968	0.952694	0.773724	4	FALSE	TRUE	TRUE	110	411	26.764	Tnon_mito	FLB7527|PRO1999|P49321	ENSG00000132780
NONO	Non-POU domain-containing octamer-binding protein OS=Homo sapiens GN=NONO PE=1 SV=4	8	9	77	35000000	33000000	57000000	44000000	61000000	59000000	34000000	55250000	1.625	0.70044	0.00934989	2.02919	60000000	50500000	1.76471	1.48529	0.819428	0.570749	4	TRUE	TRUE	TRUE	220	411	53.528	Tnon_mito	NMT55|NRB54|P54|P54NRB|Q15233	ENSG00000147140
PFDN2	Prefoldin subunit 2 OS=Homo sapiens GN=PFDN2 PE=1 SV=1	1	1	1					6000000		0	1500000	100	6.64386	0.391002	0.407821	3000000	0	100	0	6.64386		1	FALSE	FALSE	FALSE	57	411	13.8686	Tpossible_mito	PFD2|Q9UHV9	ENSG00000143256
PLRG1	Pleiotropic regulator 1 OS=Homo sapiens GN=PLRG1 PE=2 SV=1	2	2	4	7800000	9600000		7900000			8700000	1975000	0.227011	-2.13916	0.0378683	1.42172	0	3950000	0	0.454023		-1.13916	1	TRUE	FALSE	FALSE	38	411	9.24574	Tnon_mito	Cwc1|PRL1|PRP46|PRPF46|TANGO4|O43660	ENSG00000171566
PPM1G	Protein phosphatase 1G OS=Homo sapiens GN=PPM1G PE=1 SV=1	1	1	2					3700000	3500000	0	1800000	100	6.64386	0.181936	0.740082	3600000	0	100	0	6.64386		2	FALSE	FALSE	FALSE	42	411	10.219	Tnon_mito	PP2CG|PP2CGAMMA|PPP2CG|O15355	ENSG00000115241
PRIM1	DNA primase small subunit (Fragment) OS=Homo sapiens GN=PRIM1 PE=2 SV=1	1	1	1				2800000			0	700000	100	6.64386	0.391002	0.407821	0	1400000	0	100		6.64386	1	FALSE	FALSE	FALSE	2	411	0.486618	Tnon_mito	p49|P49642	ENSG00000198056
PSMA4	Proteasome subunit alpha type-4 OS=Homo sapiens GN=PSMA4 PE=1 SV=1	3	3	13	13000000	14000000	23000000	14000000	15000000	19000000	13500000	17750000	1.31481	0.39486	0.129109	0.889043	17000000	18500000	1.25926	1.37037	0.332575	0.454566	4	FALSE	TRUE	TRUE	82	411	19.9513	Tnon_mito	HC9|HsT17706|PSC9|P25789	ENSG00000041357
RBBP5	Retinoblastoma-binding protein 5 OS=Homo sapiens GN=RBBP5 PE=1 SV=2	1	1	1			1400000				0	350000	100	6.64386	0.391002	0.407821	0	700000	0	100		6.64386	1	FALSE	FALSE	FALSE	18	411	4.37956	Tnon_mito	RBQ3|SWD1|Q15291	ENSG00000117222
RBBP7	Histone-binding protein RBBP7 OS=Homo sapiens GN=RBBP7 PE=1 SV=1	6	10	57	10000000	11000000	11000000	14000000	20000000	28000000	10500000	18250000	1.7381	0.797507	0.129871	0.886487	24000000	12500000	2.28571	1.19048	1.19265	0.251539	4	FALSE	TRUE	TRUE	148	411	36.0097	Tnon_mito	RbAp46|Q16576	ENSG00000102054
RBM3	Putative RNA-binding protein 3 OS=Homo sapiens GN=RBM3 PE=1 SV=1	3	3	7	20000000	23000000	2700000	22000000	24000000		21500000	12175000	0.566279	-0.820415	0.236403	0.626347	12000000	12350000	0.55814	0.574419	-0.841302	-0.799826	3	FALSE	TRUE	TRUE	88	411	21.4112	Tnon_mito	IS1-RNPL|RNPL|P98179	ENSG00000102317
RBM4	RNA-binding protein 4 OS=Homo sapiens GN=RBM4 PE=1 SV=1	6	6	16	8500000	7900000	8200000	7900000	12000000	8600000	8200000	9175000	1.1189	0.162084	0.391118	0.407692	10300000	8050000	1.2561	0.981707	0.328949	-0.0266351	4	FALSE	TRUE	TRUE	33	411	8.0292	Tnon_mito	LARK|RBM4A|RP11-658F2.8|ZCCHC21|ZCRB3A|Q9BWF3	ENSG00000173933
UPF1	Regulator of nonsense transcripts 1 OS=Homo sapiens GN=UPF1 PE=1 SV=2	2	2	2		1700000	3000000				850000	750000	0.882353	-0.180572	0.935979	0.0287337	0	1500000	0	1.76471		0.819428	1	FALSE	FALSE	FALSE	35	411	8.51582	Tnon_mito	HUPF1|NORF1|RENT1|pNORF1|smg-2|Q92900	ENSG00000005007
ROCK1	Rho-associated protein kinase 1 OS=Homo sapiens GN=ROCK1 PE=1 SV=1	16	16	47	8700000	16000000	13000000	16000000	14000000	12000000	12350000	13750000	1.11336	0.154921	0.767462	0.114943	13000000	14500000	1.05263	1.17409	0.0740006	0.231542	4	FALSE	TRUE	TRUE	28	411	6.81265	Tnon_mito	P160ROCK|ROCK-I|Q13464	ENSG00000067900
RPA1	Replication protein A 70 kDa DNA-binding subunit OS=Homo sapiens GN=RPA1 PE=1 SV=2	19	19	157	36000000	43000000	32000000	30000000	42000000	54000000	39500000	39500000	1	0	1	0	48000000	31000000	1.21519	0.78481	0.281182	-0.349584	4	FALSE	TRUE	TRUE	84	411	20.438	Tnon_mito	HSSB|MST075|REPA1|RF-A|RP-A|RPA70|P27694	ENSG00000132383
RPA2	Replication protein A 32 kDa subunit OS=Homo sapiens GN=RPA2 PE=1 SV=1	6	6	36	43000000	40000000	30000000	17000000	41000000	49000000	41500000	34250000	0.825301	-0.277007	0.377082	0.423565	45000000	23500000	1.08434	0.566265	0.116814	-0.820451	4	FALSE	TRUE	TRUE	55	411	13.382	Tnon_mito	REPA2|RPA32|P15927	ENSG00000117748
RPS6KA3	Ribosomal protein S6 kinase alpha-3 OS=Homo sapiens GN=RPS6KA3 PE=1 SV=1	5	6	10			5200000	11000000		7800000	0	6000000	100	6.64386	0.0817517	1.0875	3900000	8100000	100	100	6.64386	6.64386	3	FALSE	TRUE	TRUE	3	411	0.729927	Tnon_mito	CLS|HU-3|ISPK-1|MAPKAPK1B|MRX19|RSK|RSK2|S6K-alpha3|p90-RSK2|pp90RSK2|P51812	ENSG00000177189
SEC13	Isoform 3 of Protein SEC13 homolog OS=Homo sapiens GN=SEC13	2	2	4	7300000		15000000		7500000	5800000	3650000	7075000	1.93836	0.954834	0.534587	0.271981	6650000	7500000	1.82192	2.05479	0.865458	1.03899	3	FALSE	FALSE	FALSE	61	411	14.8418	Tnon_mito	D3S1231E|SEC13L1|SEC13R|npp-20|P55735	ENSG00000157020
SRSF1	Isoform ASF-2 of Serine/arginine-rich splicing factor 1 OS=Homo sapiens GN=SRSF1	3	3	16	11000000	10000000	11000000	9000000	12000000	9000000	10500000	10250000	0.97619	-0.0347654	0.795487	0.0993671	10500000	10000000	1	0.952381	0	-0.0703893	4	FALSE	TRUE	TRUE	134	411	32.6034	Tnon_mito	ASF|SF2|SF2p33|SFRS1|SRp30a|Q07955	ENSG00000136450
SRSF3	Serine/arginine-rich splicing factor 3 OS=Homo sapiens GN=SRSF3 PE=1 SV=1	2	3	17	24000000	15000000		15000000	17000000	16000000	19500000	12000000	0.615385	-0.70044	0.311996	0.505851	16500000	7500000	0.846154	0.384615	-0.241008	-1.37851	3	FALSE	FALSE	TRUE	197	411	47.9319	Tnon_mito	SFRS3|SRp20|P84103	ENSG00000112081
SRSF5	Serine/arginine-rich splicing factor 5 OS=Homo sapiens GN=SRSF5 PE=1 SV=1	3	3	10	18000000	22000000	15000000	13000000	23000000	13000000	20000000	16000000	0.8	-0.321928	0.276767	0.557885	18000000	14000000	0.9	0.7	-0.152003	-0.514573	4	FALSE	TRUE	TRUE	112	411	27.2506	Tnon_mito	HRS|SFRS5|SRP40|Q13243	ENSG00000100650
SRSF7	Serine/arginine-rich splicing factor 7 OS=Homo sapiens GN=SRSF7 PE=1 SV=1	1	2	11		7400000					3700000	0	0		0.5	0.30103	0	0	0	0			0	FALSE	FALSE	TRUE	191	411	46.472	Tnon_mito	9G8|AAG3|SFRS7|Q16629	ENSG00000115875
SNRPA	U1 small nuclear ribonucleoprotein A OS=Homo sapiens GN=SNRPA PE=1 SV=3	1	2	15		30000000			17000000	19000000	15000000	9000000	0.6	-0.736966	0.759661	0.11938	18000000	0	1.2	0	0.263034		2	FALSE	FALSE	TRUE	68	411	16.545	Tnon_mito	Mud1|U1-A|U1A|P09012	ENSG00000077312
SRP72	Signal recognition particle subunit SRP72 OS=Homo sapiens GN=SRP72 PE=1 SV=3	12	12	68	18000000	17000000	24000000	20000000	24000000	26000000	17500000	23500000	1.34286	0.425306	0.0132456	1.87793	25000000	22000000	1.42857	1.25714	0.514573	0.330149	4	TRUE	TRUE	TRUE	65	411	15.8151	Tnon_mito	BMFF|HEL103|O76094	ENSG00000174780
TRIM21	E3 ubiquitin-protein ligase TRIM21 OS=Homo sapiens GN=TRIM21 PE=2 SV=1	11	12	69	38000000	36000000	70000000	60000000	67000000	64000000	37000000	65250000	1.76351	0.818453	0.000322424	3.49157	65500000	65000000	1.77027	1.75676	0.82397	0.812914	4	TRUE	TRUE	TRUE	146	411	35.5231	Tnon_mito	RNF81|RO52|SSA|SSA1|P19474	ENSG00000132109
MAP3K7	Mitogen-activated protein kinase kinase kinase 7 OS=Homo sapiens GN=MAP3K7 PE=1 SV=1	9	9	71	18000000	24000000	19000000	23000000	24000000	26000000	21000000	23000000	1.09524	0.131245	0.626749	0.202906	25000000	21000000	1.19048	1	0.251539	0	4	FALSE	TRUE	TRUE	12	411	2.91971	Tnon_mito	MEKK7|TAK1|TGF1a|O43318	ENSG00000135341
U2AF1	Splicing factor U2AF 35 kDa subunit OS=Homo sapiens GN=U2AF1 PE=1 SV=3	1	1	2					5600000	6100000	0	2925000	100	6.64386	0.182271	0.739283	5850000	0	100	0	6.64386		2	FALSE	FALSE	FALSE	127	411	30.9002	Tnon_mito	FP793|RN|RNU2AF1|U2AF35|U2AFBP|P0DN76	ENSG00000160201
SF1	Isoform 5 of Splicing factor 1 OS=Homo sapiens GN=SF1	5	5	21	14000000	14000000	19000000	25000000	19000000	20000000	14000000	20750000	1.48214	0.567685	0.0182199	1.73946	19500000	22000000	1.39286	1.57143	0.478047	0.652077	4	TRUE	TRUE	TRUE	81	411	19.708	Tnon_mito	BBP|D11S636|MBBP|ZCCHC25|ZFM1|ZNF162|Q15637	ENSG00000168066
AIMP2	Aminoacyl tRNA synthase complex-interacting multifunctional protein 2 OS=Homo sapiens GN=AIMP2 PE=1 SV=2	1	1	6	2300000	2500000	3600000	3800000	3900000	4000000	2400000	3825000	1.59375	0.672425	0.00342065	2.46589	3950000	3700000	1.64583	1.54167	0.718818	0.624491	4	TRUE	FALSE	TRUE	60	411	14.5985	Tnon_mito	JTV-1|JTV1|P38|Q13155	ENSG00000106305
AAAS	Aladin OS=Homo sapiens GN=AAAS PE=1 SV=1	5	5	12			10000000	8100000	8800000	9800000	0	9175000	100	6.64386	0.000248121	3.60534	9300000	9050000	100	100	6.64386	6.64386	4	TRUE	TRUE	TRUE	8	411	1.94647	Tnon_mito	AAA|AAASb|ADRACALA|ADRACALIN|ALADIN|Q9NRG9	ENSG00000094914
RBM10	RNA-binding protein 10 OS=Homo sapiens GN=RBM10 PE=1 SV=3	17	17	119	91000000	83000000	51000000	45000000	60000000	57000000	87000000	53250000	0.612069	-0.708234	0.0131568	1.88085	58500000	48000000	0.672414	0.551724	-0.572579	-0.857981	4	TRUE	TRUE	TRUE	175	411	42.5791	Tnon_mito	DXS8237E|GPATC9|GPATCH9|S1-1|TARPS|ZRANB5|P98175	ENSG00000182872
KHSRP	Far upstream element-binding protein 2 OS=Homo sapiens GN=KHSRP PE=1 SV=4	9	10	67	23000000	21000000	35000000	28000000	31000000	28000000	22000000	30500000	1.38636	0.471306	0.0118273	1.92712	29500000	31500000	1.34091	1.43182	0.423211	0.517848	4	TRUE	TRUE	TRUE	133	411	32.3601	Tnon_mito	FBP2|FUBP2|KSRP|Q92945	ENSG00000088247
EIF3G	Eukaryotic translation initiation factor 3 subunit G OS=Homo sapiens GN=EIF3G PE=1 SV=2	2	12	158	100000000	280000000	130000000	190000000	170000000	160000000	190000000	162500000	0.855263	-0.22556	0.811445	0.0907409	165000000	160000000	0.868421	0.842105	-0.203533	-0.247928	4	FALSE	FALSE	TRUE	109	411	26.5207	Tnon_mito	EIF3-P42|EIF3S4|eIF3-delta|eIF3-p44|O75821	ENSG00000130811
EIF3G	Eukaryotic translation initiation factor 3 subunit G (Fragment) OS=Homo sapiens GN=EIF3G PE=2 SV=1	1	9	111	4900000				22000000	19000000	2450000	10250000	4.18367	2.06477	0.295727	0.52911	20500000	0	8.36735	0	3.06477		2	FALSE	FALSE	TRUE	109	411	26.5207	Tnon_mito	EIF3-P42|EIF3S4|eIF3-delta|eIF3-p44|O75821	ENSG00000130811
EIF3G	Eukaryotic translation initiation factor 3 subunit G (Fragment) OS=Homo sapiens GN=EIF3G PE=2 SV=2	1	11	148	13000000						6500000	0	0		0.5	0.30103	0	0	0	0			0	FALSE	FALSE	TRUE	109	411	26.5207	Tnon_mito	EIF3-P42|EIF3S4|eIF3-delta|eIF3-p44|O75821	ENSG00000130811
RNMT	Isoform 2 of mRNA cap guanine-N7 methyltransferase OS=Homo sapiens GN=RNMT	1	1	1	10000000						5000000	0	0		0.5	0.30103	0	0	0	0			0	FALSE	FALSE	FALSE	13	411	3.16302	Tnon_mito	MET|RG7MT1|hCMT1c|O43148	ENSG00000101654
MYH13	Myosin-13 OS=Homo sapiens GN=MYH13 PE=1 SV=2	1	1	1			28000000				0	7000000	100	6.64386	0.391002	0.407821	0	14000000	0	100		6.64386	1	FALSE	FALSE	FALSE	9	411	2.18978	Tnon_mito	MyHC-IIL|MyHC-eo|Q9UKX3	ENSG00000006788
PABPC4	Isoform 3 of Polyadenylate-binding protein 4 OS=Homo sapiens GN=PABPC4	9	15	102	16000000	12000000	8200000	14000000	18000000	18000000	14000000	14550000	1.03929	0.0555923	0.867509	0.0617261	18000000	11100000	1.28571	0.792857	0.36257	-0.334867	4	FALSE	TRUE	TRUE	142	411	34.5499	Tnon_mito	APP-1|APP1|PABP4|iPABP|Q13310	ENSG00000090621
ALKBH1	Alkylated DNA repair protein alkB homolog 1 OS=Homo sapiens GN=ALKBH1 PE=1 SV=2	13	15	103			92000000	94000000	92000000	110000000	0	97000000	100	6.64386	0.000198673	3.70186	101000000	93000000	100	100	6.64386	6.64386	4	TRUE	TRUE	TRUE	2	411	0.486618	Tmito	ABH|ABH1|ALKBH|alkB|hABH|Q13686	ENSG00000100601
ALKBH1	Alkylated DNA repair protein alkB homolog 1 (Fragment) OS=Homo sapiens GN=ALKBH1 PE=2 SV=1	1	3	25			31000000	30000000	28000000	29000000	0	29500000	100	6.64386	2.30643e-05	4.63706	28500000	30500000	100	100	6.64386	6.64386	4	TRUE	FALSE	TRUE	2	411	0.486618	Tmito	ABH|ABH1|ALKBH|alkB|hABH|Q13686	ENSG00000100601
PDLIM1	PDZ and LIM domain protein 1 OS=Homo sapiens GN=PDLIM1 PE=1 SV=4	1	1	2			2100000	3400000			0	1375000	100	6.64386	0.198986	0.701177	0	2750000	0	100		6.64386	2	FALSE	FALSE	FALSE	32	411	7.78589	Tnon_mito	CLIM1|CLP-36|CLP36|HEL-S-112|hCLIM1|O00151	ENSG00000107438
PRPF4	U4/U6 small nuclear ribonucleoprotein Prp4 OS=Homo sapiens GN=PRPF4 PE=1 SV=2	1	1	3	4100000			6500000		6100000	2050000	3150000	1.53659	0.619728	0.718385	0.143643	3050000	3250000	1.4878	1.58537	0.573185	0.664816	2	FALSE	FALSE	FALSE	50	411	12.1655	Tnon_mito	HPRP4|HPRP4P|PRP4|Prp4p|SNRNP60|O43172	ENSG00000136875
AURKB	Isoform 5 of Aurora kinase B OS=Homo sapiens GN=AURKB	2	2	2			7400000				0	1850000	100	6.64386	0.391002	0.407821	0	3700000	0	100		6.64386	1	FALSE	FALSE	FALSE	29	411	7.05596	Tnon_mito	AIK2|AIM-1|AIM1|ARK2|AurB|IPL1|PPP1R48|STK12|STK5|aurkb-sv1|aurkb-sv2|Q96GD4	ENSG00000178999
SRSF11	Serine/arginine-rich splicing factor 11 OS=Homo sapiens GN=SRSF11 PE=1 SV=1	1	1	1		3700000					1850000	0	0		0.5	0.30103	0	0	0	0			0	FALSE	FALSE	FALSE	97	411	23.601	Tnon_mito	NET2|SFRS11|dJ677H15.2|p54|Q05519	ENSG00000116754
QKI	Protein quaking OS=Homo sapiens GN=QKI PE=1 SV=1	1	1	2	8300000	5900000					7100000	0	0		0.10659	0.972282	0	0	0	0			0	FALSE	FALSE	FALSE	14	411	3.40633	Tnon_mito	Hqk|QK|QK1|QK3|hqkI|Q96PU8	ENSG00000112531
FXR2	Fragile X mental retardation syndrome-related protein 2 OS=Homo sapiens GN=FXR2 PE=1 SV=2	1	1	1		1900000					950000	0	0		0.5	0.30103	0	0	0	0			0	FALSE	FALSE	FALSE	46	411	11.1922	Tnon_mito	FMR1L2|FXR2P|P51116	ENSG00000129245
EEF1E1	Eukaryotic translation elongation factor 1 epsilon-1 OS=Homo sapiens GN=EEF1E1 PE=1 SV=1	3	3	24	13000000	15000000	15000000	15000000	17000000	18000000	14000000	16250000	1.16071	0.215013	0.201614	0.69548	17500000	15000000	1.25	1.07143	0.321928	0.0995357	4	FALSE	TRUE	TRUE	83	411	20.1946	Tnon_mito	AIMP3|P18|O43324	ENSG00000124802
G3BP2	Ras GTPase-activating protein-binding protein 2 OS=Homo sapiens GN=G3BP2 PE=1 SV=2	6	6	39	25000000	26000000	32000000	34000000	31000000	34000000	25500000	32750000	1.28431	0.360998	0.00139653	2.85495	32500000	33000000	1.27451	1.29412	0.349942	0.371969	4	TRUE	TRUE	TRUE	59	411	14.3552	Tnon_mito	Q9UN86	ENSG00000138757
RBM8A	RNA-binding protein 8A OS=Homo sapiens GN=RBM8A PE=1 SV=1	1	1	1		5300000					2650000	0	0		0.5	0.30103	0	0	0	0			0	FALSE	FALSE	FALSE	54	411	13.1387	Tnon_mito	BOV-1A|BOV-1B|BOV-1C|C1DELq21.1|DEL1q21.1|MDS014|RBM8|RBM8B|TAR|Y14|ZNRP|ZRNP1|Q9Y5S9	ENSG00000131795
USP15	Ubiquitin carboxyl-terminal hydrolase 15 OS=Homo sapiens GN=USP15 PE=1 SV=3	5	5	13	2400000	3500000	4000000	4400000	6000000	7600000	2950000	5500000	1.86441	0.898717	0.0626445	1.20312	6800000	4200000	2.30508	1.42373	1.20482	0.509674	4	FALSE	TRUE	TRUE	56	411	13.6253	Tnon_mito	UNPH-2|UNPH4|Q9Y4E8	ENSG00000135655
RBX1	E3 ubiquitin-protein ligase RBX1 OS=Homo sapiens GN=RBX1 PE=1 SV=1	1	1	1						12000000	0	3000000	100	6.64386	0.391002	0.407821	6000000	0	100	0	6.64386		1	FALSE	FALSE	FALSE	18	411	4.37956	Tnon_mito	BA554C12.1|RNF75|ROC1|P62877	ENSG00000100387
HNRNPDL	Heterogeneous nuclear ribonucleoprotein D-like OS=Homo sapiens GN=HNRNPDL PE=1 SV=3	5	7	54	16000000	8500000	15000000	9900000	19000000	12000000	12250000	13975000	1.14082	0.190067	0.732077	0.135443	15500000	12450000	1.26531	1.01633	0.339486	0.023364	4	FALSE	TRUE	TRUE	139	411	33.82	Tnon_mito	HNRNP|HNRPDL|JKTBP|JKTBP2|laAUF1|O14979	ENSG00000152795
RANBP9	Ran-binding protein 9 OS=Homo sapiens GN=RANBP9 PE=1 SV=1	4	5	11	3900000	2200000		2800000	2800000	3100000	3050000	2175000	0.713115	-0.487794	0.500481	0.300612	2950000	1400000	0.967213	0.459016	-0.0480943	-1.12338	3	FALSE	TRUE	TRUE	18	411	4.37956	Tnon_mito	BPM-L|BPM90|RANBPM|RanBP7|Q96S59	ENSG00000010017
PREB	Prolactin regulatory element-binding protein OS=Homo sapiens GN=PREB PE=1 SV=2	1	1	1						3100000	0	775000	100	6.64386	0.391002	0.407821	1550000	0	100	0	6.64386		1	FALSE	FALSE	FALSE	4	411	0.973236	Tnon_mito	SEC12|Q9HCU5	ENSG00000138073
G3BP1	Ras GTPase-activating protein-binding protein 1 OS=Homo sapiens GN=G3BP1 PE=1 SV=1	9	9	53	29000000	28000000	34000000	30000000	40000000	43000000	28500000	36750000	1.28947	0.366782	0.0648649	1.18799	41500000	32000000	1.45614	1.12281	0.542149	0.16711	4	FALSE	TRUE	TRUE	141	411	34.3066	Tnon_mito	G3BP|HDH-VIII|Q13283	ENSG00000145907
ALYREF	THO complex subunit 4 OS=Homo sapiens GN=ALYREF PE=2 SV=1	8	8	238	1400000000	1300000000	900000000	840000000	1100000000	1100000000	1350000000	985000000	0.72963	-0.454764	0.0138081	1.85987	1100000000	870000000	0.814815	0.644444	-0.295456	-0.633872	4	TRUE	TRUE	TRUE	177	411	43.0657	Tnon_mito	ALY|ALY/REF|BEF|REF|THOC4|Q86V81	ENSG00000183684
PLIN3	Perilipin-3 OS=Homo sapiens GN=PLIN3 PE=1 SV=3	4	4	11			10000000	7000000	9000000	8200000	0	8550000	100	6.64386	0.000883444	3.05382	8600000	8500000	100	100	6.64386	6.64386	4	TRUE	TRUE	TRUE	31	411	7.54258	Tnon_mito	M6PRBP1|PP17|TIP47|O60664	ENSG00000105355
DCAF7	DDB1- and CUL4-associated factor 7 OS=Homo sapiens GN=DCAF7 PE=1 SV=1	1	1	1					11000000		0	2750000	100	6.64386	0.391002	0.407821	5500000	0	100	0	6.64386		1	FALSE	FALSE	FALSE	33	411	8.0292	Tnon_mito	AN11|HAN11|SWAN-1|WDR68|P61962	ENSG00000136485
SF3B4	Splicing factor 3B subunit 4 OS=Homo sapiens GN=SF3B4 PE=1 SV=1	3	3	27	26000000	27000000	17000000	20000000	21000000	18000000	26500000	19000000	0.716981	-0.479993	0.00198108	2.7031	19500000	18500000	0.735849	0.698113	-0.442518	-0.518467	4	TRUE	TRUE	TRUE	96	411	23.3577	Tnon_mito	AFD1|Hsh49|SAP49|SF3b49|Q15427	ENSG00000143368
CD2BP2	CD2 antigen cytoplasmic tail-binding protein 2 OS=Homo sapiens GN=CD2BP2 PE=1 SV=1	1	1	5	7800000	7700000	8900000	6500000		8200000	7750000	5900000	0.76129	-0.393481	0.429404	0.367134	4100000	7700000	0.529032	0.993548	-0.918572	-0.00933786	3	FALSE	FALSE	TRUE	37	411	9.00243	Tnon_mito	FWP010|LIN1|PPP1R59|Snu40|U5-52K|O95400	ENSG00000169217
IGF2BP1	Insulin-like growth factor 2 mRNA-binding protein 1 OS=Homo sapiens GN=IGF2BP1 PE=1 SV=2	15	16	124	48000000	48000000	41000000	40000000	49000000	49000000	48000000	44750000	0.932292	-0.101147	0.278533	0.555123	49000000	40500000	1.02083	0.84375	0.0297473	-0.245112	4	FALSE	TRUE	TRUE	114	411	27.7372	Tnon_mito	CRD-BP|CRDBP|IMP-1|IMP1|VICKZ1|ZBP1|Q9NZI8	ENSG00000159217
IGF2BP3	Insulin-like growth factor 2 mRNA-binding protein 3 OS=Homo sapiens GN=IGF2BP3 PE=1 SV=2	3	5	20	8000000	7700000	4800000	5000000	7500000	6900000	7850000	6050000	0.770701	-0.375758	0.0735375	1.13349	7200000	4900000	0.917197	0.624204	-0.124696	-0.679911	4	FALSE	TRUE	TRUE	87	411	21.1679	Tnon_mito	CT98|IMP-3|IMP3|KOC1|VICKZ3|O00425	ENSG00000136231
IGF2BP2	Insulin-like growth factor 2 mRNA-binding protein 2 OS=Homo sapiens GN=IGF2BP2 PE=2 SV=1	1	3	15	5300000	7700000	4800000	5000000	3400000	5400000	6500000	4650000	0.715385	-0.483209	0.345361	0.461727	4400000	4900000	0.676923	0.753846	-0.562936	-0.407658	4	FALSE	FALSE	TRUE	80	411	19.4647	Tnon_mito	IMP-2|IMP2|VICKZ2|p62|Q9Y6M1	ENSG00000073792
HNRNPA0	Heterogeneous nuclear ribonucleoprotein A0 OS=Homo sapiens GN=HNRNPA0 PE=1 SV=1	4	4	28	28000000	33000000	22000000	21000000	26000000	28000000	30500000	24250000	0.795082	-0.330824	0.176201	0.753991	27000000	21500000	0.885246	0.704918	-0.17585	-0.504473	4	FALSE	TRUE	TRUE	164	411	39.9027	Tnon_mito	HNRPA0|Q13151	ENSG00000177733
CPSF6	Isoform 2 of Cleavage and polyadenylation specificity factor subunit 6 OS=Homo sapiens GN=CPSF6	2	2	6			6600000	6300000	7100000	7300000	0	6825000	100	6.64386	8.2615e-05	4.08294	7200000	6450000	100	100	6.64386	6.64386	4	TRUE	FALSE	TRUE	137	411	33.3333	Tnon_mito	CFIM|CFIM68|HPBRII-4|HPBRII-7|Q16630	ENSG00000111605
WDR5	WD repeat-containing protein 5 OS=Homo sapiens GN=WDR5 PE=1 SV=1	6	6	12	10000000	11000000		8800000	14000000	6000000	10500000	7200000	0.685714	-0.544321	0.342094	0.465854	10000000	4400000	0.952381	0.419048	-0.0703893	-1.25481	3	FALSE	TRUE	TRUE	31	411	7.54258	Tnon_mito	BIG-3|SWD3|P61964	ENSG00000196363
HNRNPUL1	Heterogeneous nuclear ribonucleoprotein U-like protein 1 OS=Homo sapiens GN=HNRNPUL1 PE=1 SV=2	2	2	2		10000000			5500000		5000000	1375000	0.275	-1.8625	0.598432	0.222985	2750000	0	0.55	0	-0.862496		1	FALSE	FALSE	FALSE	106	411	25.7908	Tnon_mito	E1B-AP5|E1BAP5|HNRPUL1|Q9BUJ2	ENSG00000105323
STK38	Serine/threonine-protein kinase 38 OS=Homo sapiens GN=STK38 PE=1 SV=1	18	22	191	140000000	160000000	190000000	180000000	200000000	190000000	150000000	190000000	1.26667	0.341037	0.115608	0.937012	195000000	185000000	1.3	1.23333	0.378512	0.302563	4	FALSE	TRUE	TRUE	168	411	40.8759	Tnon_mito	NDR|NDR1|Q15208	ENSG00000112079
U2AF2	Splicing factor U2AF 65 kDa subunit OS=Homo sapiens GN=U2AF2 PE=1 SV=4	5	5	19	9000000	11000000	6500000	7100000	5800000	8900000	10000000	7075000	0.7075	-0.499198	0.138327	0.859092	7350000	6800000	0.735	0.68	-0.444184	-0.556393	4	FALSE	TRUE	TRUE	124	411	30.1703	Tnon_mito	U2AF65|P26368	ENSG00000063244
PUF60	Poly(U)-binding-splicing factor PUF60 OS=Homo sapiens GN=PUF60 PE=1 SV=1	2	2	11	7700000	9300000	8800000	9300000	8100000	7200000	8500000	8350000	0.982353	-0.0256866	0.88788	0.0516457	7650000	9050000	0.9	1.06471	-0.152003	0.090455	4	FALSE	FALSE	TRUE	145	411	35.2798	Tnon_mito	FIR|RoBPI|SIAHBP1|VRJS|Q9UHX1	ENSG00000179950
SLC4A1AP	Kanadaptin OS=Homo sapiens GN=SLC4A1AP PE=1 SV=1	2	2	6	5800000	7300000	4900000		6900000	7500000	6550000	4825000	0.736641	-0.440966	0.408097	0.389237	7200000	2450000	1.09924	0.374046	0.136502	-1.41871	3	FALSE	FALSE	TRUE	21	411	5.10949	Tnon_mito	Q9BWU0	ENSG00000163798
EXOSC7	Exosome complex component RRP42 OS=Homo sapiens GN=EXOSC7 PE=1 SV=3	1	1	1					5600000		0	1400000	100	6.64386	0.391002	0.407821	2800000	0	100	0	6.64386		1	FALSE	FALSE	FALSE	28	411	6.81265	Tnon_mito	EAP1|RRP42|Rrp42p|hRrp42p|p8|Q15024	ENSG00000075914
KDM1A	Lysine-specific histone demethylase 1A OS=Homo sapiens GN=KDM1A PE=2 SV=1	2	2	6		4100000	4600000	3200000	4600000	4800000	2050000	4300000	2.09756	1.06871	0.466636	0.331022	4700000	3900000	2.29268	1.90244	1.19704	0.92785	4	FALSE	FALSE	TRUE	37	411	9.00243	Tnon_mito	AOF2|BHC110|KDM1|LSD1|O60341	ENSG00000004487
U2SURP	U2 snRNP-associated SURP motif-containing protein OS=Homo sapiens GN=U2SURP PE=1 SV=2	2	2	2		8500000					4250000	0	0		0.5	0.30103	0	0	0	0			0	FALSE	FALSE	FALSE	104	411	25.3041	Tnon_mito	SR140|fSAPa|O15042	ENSG00000163714
TARDBP	TAR DNA-binding protein 43 OS=Homo sapiens GN=TARDBP PE=1 SV=1	3	3	8		3100000	6300000	5300000	4600000	6600000	1550000	5700000	3.67742	1.87869	0.204585	0.689125	5600000	5800000	3.6129	3.74194	1.85316	1.90378	4	FALSE	TRUE	TRUE	91	411	22.1411	Tnon_mito	ALS10|TDP-43|Q13148	ENSG00000120948
SKIV2L2	Superkiller viralicidic activity 2-like 2 OS=Homo sapiens GN=SKIV2L2 PE=1 SV=3	1	1	2				3000000		3900000	0	1725000	100	6.64386	0.18706	0.72802	1950000	1500000	100	100	6.64386	6.64386	2	FALSE	FALSE	FALSE	66	411	16.0584	Tnon_mito	Dob1|KIAA0052|Mtr4|fSAP118|P42285	ENSG00000039123
CASP14	Caspase-14 OS=Homo sapiens GN=CASP14 PE=1 SV=2	2	2	3	10000000	10000000					10000000	0	0				0	0	0	0			0		FALSE	FALSE	53	411	12.8954	Tnon_mito	P31944	ENSG00000105141
CD2AP	CD2-associated protein OS=Homo sapiens GN=CD2AP PE=1 SV=1	1	1	1						10000000	0	2500000	100	6.64386	0.391002	0.407821	5000000	0	100	0	6.64386		1	FALSE	FALSE	FALSE	33	411	8.0292	Tnon_mito	CMS|Q9Y5K6	ENSG00000198087
GIGYF2	PERQ amino acid-rich with GYF domain-containing protein 2 OS=Homo sapiens GN=GIGYF2 PE=1 SV=1	4	4	23	7800000	6600000	12000000	13000000	13000000	13000000	7200000	12750000	1.77083	0.824428	0.0378283	1.42218	13000000	12500000	1.80556	1.73611	0.852443	0.795859	4	TRUE	TRUE	TRUE	45	411	10.9489	Tnon_mito	GYF2|PARK11|PERQ2|PERQ3|TNRC15|Q6Y7W6	ENSG00000204120
SERBP1	Plasminogen activator inhibitor 1 RNA-binding protein OS=Homo sapiens GN=SERBP1 PE=1 SV=2	1	11	94						14000000	0	3500000	100	6.64386	0.391002	0.407821	7000000	0	100	0	6.64386		1	FALSE	FALSE	TRUE	175	411	42.5791	Tnon_mito	CHD3IP|HABP4L|PAI-RBP1|PAIRBP1|Q8NC51	ENSG00000142864
SERBP1	Isoform 3 of Plasminogen activator inhibitor 1 RNA-binding protein OS=Homo sapiens GN=SERBP1	2	12	102	81000000	80000000	61000000	57000000	66000000	85000000	80500000	67250000	0.835404	-0.259455	0.121694	0.91473	75500000	59000000	0.937888	0.732919	-0.0925121	-0.448274	4	FALSE	FALSE	TRUE	175	411	42.5791	Tnon_mito	CHD3IP|HABP4L|PAI-RBP1|PAIRBP1|Q8NC51	ENSG00000142864
DAZAP1	DAZ-associated protein 1 OS=Homo sapiens GN=DAZAP1 PE=1 SV=1	1	1	3				3000000	3400000	3600000	0	2500000	100	6.64386	0.0592126	1.22759	3500000	1500000	100	100	6.64386	6.64386	3	FALSE	FALSE	FALSE	50	411	12.1655	Tnon_mito	Q96EP5	ENSG00000071626
RBMX	RNA-binding motif protein, X chromosome OS=Homo sapiens GN=RBMX PE=1 SV=3	7	7	40	29000000	37000000	23000000	28000000	26000000	28000000	33000000	26250000	0.795455	-0.330149	0.323693	0.489867	27000000	25500000	0.818182	0.772727	-0.289507	-0.371969	4	FALSE	TRUE	TRUE	169	411	41.1192	Tnon_mito	HNRNPG|HNRPG|RBMXP1|RBMXRT|RNMX|hnRNP-G|P38159	ENSG00000147274
HTATSF1	HIV Tat-specific factor 1 OS=Homo sapiens GN=HTATSF1 PE=1 SV=1	5	5	9	14000000	5100000	21000000	17000000	11000000		9550000	12250000	1.28272	0.359209	0.699944	0.154937	5500000	19000000	0.575916	1.98953	-0.796069	0.992427	3	FALSE	TRUE	TRUE	61	411	14.8418	Tnon_mito	TAT-SF1|TATSF1|dJ196E23.2|O43719	ENSG00000102241
STRN3	Striatin-3 OS=Homo sapiens GN=STRN3 PE=1 SV=3	3	3	5			4300000		6700000	4200000	0	3800000	100	6.64386	0.0719762	1.14281	5450000	2150000	100	100	6.64386	6.64386	3	FALSE	TRUE	TRUE	18	411	4.37956	Tnon_mito	SG2NA|Q13033	ENSG00000196792
ASCC1	Activating signal cointegrator 1 complex subunit 1 OS=Homo sapiens GN=ASCC1 PE=1 SV=1	3	3	3	7200000	2500000				5400000	4850000	1350000	0.278351	-1.84503	0.343982	0.463464	2700000	0	0.556701	0	-0.845025		1	FALSE	TRUE	FALSE	5	411	1.21655	Tnon_mito	ASC1p50|p50|Q8N9N2	ENSG00000138303
WAC	WW domain-containing adapter protein with coiled-coil OS=Homo sapiens GN=WAC PE=1 SV=3	2	2	3	4200000	4700000					4450000	0	0		0.0357276	1.447	0	0	0	0			0	TRUE	FALSE	FALSE	14	411	3.40633	Tnon_mito	BM-016|PRO1741|Wwp4|Q9BTA9	ENSG00000095787
SGTB	Small glutamine-rich tetratricopeptide repeat-containing protein beta OS=Homo sapiens GN=SGTB PE=1 SV=1	1	1	1			3800000				0	950000	100	6.64386	0.391002	0.407821	0	1900000	0	100		6.64386	1	FALSE	FALSE	FALSE	0	411	0	Tnon_mito	SGT2|Q96EQ0	ENSG00000197860
RABL6	Isoform 2 of Rab-like protein 6 OS=Homo sapiens GN=RABL6	1	1	2	14000000					11000000	7000000	2750000	0.392857	-1.34792	0.652811	0.185213	5500000	0	0.785714	0	-0.347923		1	FALSE	FALSE	FALSE	17	411	4.13625	Tnon_mito	C9orf86|PARF|RBEL1|pp8875|Q3YEC7	ENSG00000196642
CCAR1	Cell division cycle and apoptosis regulator protein 1 OS=Homo sapiens GN=CCAR1 PE=1 SV=2	6	6	15	15000000	21000000	9100000	8400000		11000000	18000000	7125000	0.395833	-1.33703	0.0864553	1.06321	5500000	8750000	0.305556	0.486111	-1.71049	-1.04064	3	FALSE	TRUE	TRUE	35	411	8.51582	Tnon_mito	RP11-437A18.1|Q8IX12	ENSG00000060339
LRRC47	Leucine-rich repeat-containing protein 47 OS=Homo sapiens GN=LRRC47 PE=1 SV=1	3	3	10			5000000	4800000	5200000	5300000	0	5075000	100	6.64386	2.29527e-05	4.63917	5250000	4900000	100	100	6.64386	6.64386	4	TRUE	TRUE	TRUE	30	411	7.29927	Tnon_mito	Q8N1G4	ENSG00000130764
PLEKHH1	Pleckstrin homology domain-containing family H member 1 OS=Homo sapiens GN=PLEKHH1 PE=2 SV=2	1	1	1		7100000000					3550000000	0	0		0.5	0.30103	0	0	0	0			0	FALSE	FALSE	FALSE	1	411	0.243309	Tnon_mito	Q9ULM0	ENSG00000054690
MLST8	Target of rapamycin complex subunit LST8 OS=Homo sapiens GN=MLST8 PE=1 SV=1	1	1	2			8500000			8200000	0	4175000	100	6.64386	0.181793	0.740423	4100000	4250000	100	100	6.64386	6.64386	2	FALSE	FALSE	FALSE	1	411	0.243309	Tnon_mito	GBL|GbetaL|LST8|POP3|WAT1|Q9BVC4	ENSG00000167965
KLC2	Kinesin light chain 2 OS=Homo sapiens GN=KLC2 PE=1 SV=1	1	4	10						3900000	0	975000	100	6.64386	0.391002	0.407821	1950000	0	100	0	6.64386		1	FALSE	FALSE	TRUE	53	411	12.8954	Tnon_mito	Q9H0B6	ENSG00000174996
ETNPPL	Ethanolamine-phosphate phospho-lyase OS=Homo sapiens GN=ETNPPL PE=1 SV=1	1	1	1				18000000			0	4500000	100	6.64386	0.391002	0.407821	0	9000000	0	100		6.64386	1	FALSE	FALSE	FALSE	1	411	0.243309	Tpossible_mito	AGXT2L1|Q8TBG4	ENSG00000164089
WDR77	Methylosome protein 50 (Fragment) OS=Homo sapiens GN=WDR77 PE=4 SV=1	1	8	291	51000000	53000000	38000000	43000000	46000000	50000000	52000000	44250000	0.850962	-0.232834	0.0502587	1.29879	48000000	40500000	0.923077	0.778846	-0.115477	-0.36059	4	FALSE	FALSE	TRUE	162	411	39.4161	Tnon_mito	MEP-50|MEP50|Nbla10071|RP11-552M11.3|p44|p44/Mep50|Q9BQA1	ENSG00000116455
WDR77	Methylosome protein 50 OS=Homo sapiens GN=WDR77 PE=1 SV=1	7	14	507	1000000000	1000000000	750000000	760000000	980000000	1300000000	1000000000	947500000	0.9475	-0.0778022	0.711175	0.148024	1140000000	755000000	1.14	0.755	0.189034	-0.405451	4	FALSE	TRUE	TRUE	162	411	39.4161	Tnon_mito	MEP-50|MEP50|Nbla10071|RP11-552M11.3|p44|p44/Mep50|Q9BQA1	ENSG00000116455
MCPH1	Microcephalin OS=Homo sapiens GN=MCPH1 PE=1 SV=3	1	1	4		51000000		38000000			25500000	9500000	0.372549	-1.4245	0.642787	0.191933	0	19000000	0	0.745098		-0.424498	1	FALSE	FALSE	FALSE	0	411	0	Tnon_mito	BRIT1|MCT|Q8NEM0	ENSG00000147316
AGBL2	Cytosolic carboxypeptidase 2 OS=Homo sapiens GN=AGBL2 PE=2 SV=1	1	1	1			6600000				0	1650000	100	6.64386	0.391002	0.407821	0	3300000	0	100		6.64386	1	FALSE	FALSE	FALSE	2	411	0.486618	Tnon_mito	Q5U5Z8	ENSG00000165923
REEP4	Receptor expression-enhancing protein 4 OS=Homo sapiens GN=REEP4 PE=1 SV=1	3	3	10			23000000	28000000	25000000	28000000	0	26000000	100	6.64386	0.000228681	3.64077	26500000	25500000	100	100	6.64386	6.64386	4	TRUE	TRUE	TRUE	2	411	0.486618	Tnon_mito	C8orf20|Q9H6H4	ENSG00000168476
SH3BGRL2	SH3 domain-binding glutamic acid-rich-like protein 2 OS=Homo sapiens GN=SH3BGRL2 PE=1 SV=2	2	2	3	9300000	11000000					10150000	0	0		0.0531889	1.27418	0	0	0	0			0	FALSE	FALSE	FALSE	3	411	0.729927	Tnon_mito	Q9UJC5	ENSG00000198478
RIOK1	Serine/threonine-protein kinase RIO1 OS=Homo sapiens GN=RIOK1 PE=1 SV=2	15	15	137	140000000	130000000	76000000	74000000	91000000	81000000	135000000	80500000	0.596296	-0.745899	0.00912195	2.03991	86000000	75000000	0.637037	0.555556	-0.650551	-0.847997	4	TRUE	TRUE	TRUE	99	411	24.0876	Tnon_mito	AD034|RRP10|bA288G3.1|Q9BRS2	ENSG00000124784
GRWD1	Glutamate-rich WD repeat-containing protein 1 OS=Homo sapiens GN=GRWD1 PE=1 SV=1	2	2	4					6900000	4300000	0	2800000	100	6.64386	0.19839	0.70248	5600000	0	100	0	6.64386		2	FALSE	FALSE	FALSE	42	411	10.219	Tnon_mito	CDW4|GRWD|RRB1|WDR28|Q9BQ67	ENSG00000105447
FAR1	Fatty acyl-CoA reductase 1 OS=Homo sapiens GN=FAR1 PE=1 SV=1	1	1	3				5700000	4700000	5100000	0	3875000	100	6.64386	0.0594129	1.22612	4900000	2850000	100	100	6.64386	6.64386	3	FALSE	FALSE	FALSE	14	411	3.40633	Tnon_mito	MLSTD2|SDR10E1|Q8WVX9	ENSG00000197601
POLDIP3	Isoform 2 of Polymerase delta-interacting protein 3 OS=Homo sapiens GN=POLDIP3	1	17	258	15000000	20000000	15000000	16000000	19000000	19000000	17500000	17250000	0.985714	-0.0207586	0.938096	0.0277527	19000000	15500000	1.08571	0.885714	0.118644	-0.175087	4	FALSE	FALSE	TRUE	79	411	19.2214	Tnon_mito	PDIP46|SKAR|Q9BY77	ENSG00000100227
POLDIP3	Polymerase delta-interacting protein 3 OS=Homo sapiens GN=POLDIP3 PE=1 SV=2	1	17	267	130000000	110000000	93000000	94000000	140000000	130000000	120000000	114250000	0.952083	-0.0708402	0.735563	0.13338	135000000	93500000	1.125	0.779167	0.169925	-0.359996	4	FALSE	FALSE	TRUE	79	411	19.2214	Tnon_mito	PDIP46|SKAR|Q9BY77	ENSG00000100227
THOC3	THO complex subunit 3 OS=Homo sapiens GN=THOC3 PE=1 SV=1	1	1	1	5500000						2750000	0	0		0.5	0.30103	0	0	0	0			0	FALSE	FALSE	FALSE	50	411	12.1655	Tnon_mito	THO3|hTREX45|Q96J01	ENSG00000051596
SARNP	SAP domain-containing ribonucleoprotein OS=Homo sapiens GN=SARNP PE=1 SV=3	5	5	24	21000000	21000000	12000000	12000000	12000000	9800000	21000000	11450000	0.545238	-0.875042	0.000416282	3.38061	10900000	12000000	0.519048	0.571429	-0.946061	-0.807355	4	TRUE	TRUE	TRUE	78	411	18.9781	Tnon_mito	CIP29|HCC1|HSPC316|THO1|P82979	ENSG00000205323
TTBK1	Isoform 2 of Tau-tubulin kinase 1 OS=Homo sapiens GN=TTBK1	1	1	1						8200000	0	2050000	100	6.64386	0.391002	0.407821	4100000	0	100	0	6.64386		1	FALSE	FALSE	FALSE	0	411	0	Tnon_mito	BDTK|Q5TCY1	ENSG00000146216
MASTL	Serine/threonine-protein kinase greatwall OS=Homo sapiens GN=MASTL PE=1 SV=1	1	2	5		19000000					9500000	0	0		0.5	0.30103	0	0	0	0			0	FALSE	FALSE	TRUE	20	411	4.86618	Tnon_mito	GREATWALL|GW|GWL|MAST-L|RP11-85G18.2|THC2|hGWL|Q96GX5	ENSG00000120539
EXOSC6	Exosome complex component MTR3 OS=Homo sapiens GN=EXOSC6 PE=1 SV=1	2	2	7	7800000	5700000	6900000		6600000	7700000	6750000	5300000	0.785185	-0.348895	0.5219	0.282412	7150000	3450000	1.05926	0.511111	0.0830557	-0.968291	3	FALSE	FALSE	TRUE	72	411	17.5182	Tnon_mito	EAP4|MTR3|Mtr3p|hMtr3p|p11|Q5RKV6	ENSG00000223496
MSI2	RNA-binding protein Musashi homolog 2 OS=Homo sapiens GN=MSI2 PE=1 SV=1	1	1	1					2700000		0	675000	100	6.64386	0.391002	0.407821	1350000	0	100	0	6.64386		1	FALSE	FALSE	FALSE	13	411	3.16302	Tnon_mito	MSI2H|Q96DH6	ENSG00000153944
RAVER1	Ribonucleoprotein PTB-binding 1 OS=Homo sapiens GN=RAVER1 PE=2 SV=1	3	3	10	4700000	3200000	14000000	4900000	13000000	13000000	3950000	11225000	2.84177	1.50679	0.0367025	1.4353	13000000	9450000	3.29114	2.39241	1.71859	1.25846	4	TRUE	TRUE	TRUE	42	411	10.219	Tnon_mito	Q8IY67	ENSG00000161847
AGPAT6	Glycerol-3-phosphate acyltransferase 4 OS=Homo sapiens GN=AGPAT6 PE=1 SV=1	1	1	1						2200000	0	550000	100	6.64386	0.391002	0.407821	1100000	0	100	0	6.64386		1	FALSE	FALSE	FALSE	1	411	0.243309	Tnon_mito	1-AGPAT 6|LPAAT-zeta|LPAATZ|TSARG7|Q86UL3	ENSG00000158669
HNRNPA3	Heterogeneous nuclear ribonucleoprotein A3 OS=Homo sapiens GN=HNRNPA3 PE=1 SV=2	6	6	33	25000000	22000000	18000000	20000000	22000000	23000000	23500000	20750000	0.882979	-0.179549	0.268732	0.570681	22500000	19000000	0.957447	0.808511	-0.0627358	-0.306661	4	FALSE	TRUE	TRUE	183	411	44.5255	Tnon_mito	2610510D13Rik|D10S102|FBRNP|HNRPA3|P51991	ENSG00000170144
FOXK1	Forkhead box protein K1 OS=Homo sapiens GN=FOXK1 PE=1 SV=1	1	1	1				9600000			0	2400000	100	6.64386	0.391002	0.407821	0	4800000	0	100		6.64386	1	FALSE	FALSE	FALSE	5	411	1.21655	Tnon_mito	FOXK1L|P85037	ENSG00000164916
TAB3	TGF-beta-activated kinase 1 and MAP3K7-binding protein 3 OS=Homo sapiens GN=TAB3 PE=1 SV=2	4	4	12	8600000	9900000	16000000	6700000	9400000	7300000	9250000	9850000	1.06486	0.0906704	0.802762	0.0954131	8350000	11350000	0.902703	1.22703	-0.147677	0.295167	4	FALSE	TRUE	TRUE	6	411	1.45985	Tnon_mito	MAP3K7IP3|NAP1|Q8N5C8	ENSG00000157625
PSMD11	Isoform 2 of 26S proteasome non-ATPase regulatory subunit 11 OS=Homo sapiens GN=PSMD11	20	20	98	23000000	32000000	39000000	37000000	40000000	42000000	27500000	39500000	1.43636	0.522421	0.213719	0.670157	41000000	38000000	1.49091	1.38182	0.576192	0.466568	4	FALSE	TRUE	TRUE	97	411	23.601	Tnon_mito	Rpn6|S9|p44.5|O00231	ENSG00000108671
TCEB1	Transcription elongation factor B polypeptide 1 OS=Homo sapiens GN=TCEB1 PE=1 SV=1	1	1	2	14000000	12000000					13000000	0	0		0.0488745	1.31092	0	0	0	0			0	TRUE	FALSE	FALSE	46	411	11.1922	Tnon_mito	SIII|eloC|Q15369	ENSG00000154582
PSMD6	26S proteasome non-ATPase regulatory subunit 6 OS=Homo sapiens GN=PSMD6 PE=1 SV=1	14	14	87	40000000	30000000	60000000	64000000	56000000	61000000	35000000	60250000	1.72143	0.783606	0.096815	1.01406	58500000	62000000	1.67143	1.77143	0.741082	0.824913	4	FALSE	TRUE	TRUE	82	411	19.9513	Tnon_mito	Rpn7|S10|SGA-113M|p42A|p44S10|Q15008	ENSG00000163636
IVNS1ABP	Influenza virus NS1A-binding protein OS=Homo sapiens GN=IVNS1ABP PE=1 SV=3	3	3	7	15000000	7400000	14000000		13000000	2600000	11200000	7400000	0.660714	-0.597902	0.521945	0.282375	7800000	7000000	0.696429	0.625	-0.521953	-0.678072	3	FALSE	TRUE	TRUE	102	411	24.8175	Tnon_mito	FLARA3|HSPC068|KLHL39|ND1|NS-1|NS1-BP|NS1BP|Q9Y6Y0	ENSG00000116679
LMAN2	Vesicular integral-membrane protein VIP36 OS=Homo sapiens GN=LMAN2 PE=1 SV=1	4	4	9			8600000	9800000	11000000	9400000	0	9700000	100	6.64386	0.000299176	3.52407	10200000	9200000	100	100	6.64386	6.64386	4	TRUE	TRUE	TRUE	7	411	1.70316	Tnon_mito	C5orf8|GP36B|VIP36|Q12907	ENSG00000169223
LSM12	Protein LSM12 homolog OS=Homo sapiens GN=LSM12 PE=2 SV=1	2	2	7	18000000	16000000	19000000	18000000	13000000	21000000	17000000	17750000	1.04412	0.0622843	0.723279	0.140694	17000000	18500000	1	1.08824	0	0.121991	4	FALSE	FALSE	TRUE	80	411	19.4647	Tnon_mito	PNAS-135|Q3MHD2	ENSG00000161654
PICALM	Phosphatidylinositol-binding clathrin assembly protein OS=Homo sapiens GN=PICALM PE=1 SV=2	1	1	2			5700000			5100000	0	2700000	100	6.64386	0.182671	0.73833	2550000	2850000	100	100	6.64386	6.64386	2	FALSE	FALSE	FALSE	18	411	4.37956	Tnon_mito	CALM|CLTH|LAP|Q13492	ENSG00000073921
APMAP	Adipocyte plasma membrane-associated protein OS=Homo sapiens GN=APMAP PE=1 SV=2	10	10	56	29000000	27000000	57000000	44000000	45000000	48000000	28000000	48500000	1.73214	0.792558	0.00405429	2.39208	46500000	50500000	1.66071	1.80357	0.731804	0.850857	4	TRUE	TRUE	TRUE	13	411	3.16302	Tnon_mito	BSCv|C20orf3|Q9HDC9	ENSG00000101474
UBR5	E3 ubiquitin-protein ligase UBR5 OS=Homo sapiens GN=UBR5 PE=1 SV=2	33	33	116	9100000	7700000	23000000	24000000	28000000	28000000	8400000	25750000	3.06548	1.61611	0.000318626	3.49672	28000000	23500000	3.33333	2.79762	1.73697	1.4842	4	TRUE	TRUE	TRUE	19	411	4.62287	Tpossible_mito	DD5|EDD|EDD1|HYD|O95071	ENSG00000104517
FRYL	Protein furry homolog-like OS=Homo sapiens GN=FRYL PE=2 SV=1	6	6	8	4600000	4000000			1600000		4300000	400000	0.0930233	-3.42626	0.00187712	2.72651	800000	0	0.186047	0	-2.42626		1	TRUE	TRUE	TRUE	12	411	2.91971	Tnon_mito	KIAA0826|O94915	ENSG00000075539
CSNK2B	Casein kinase 2, beta polypeptide, isoform CRA_d OS=Homo sapiens GN=CSNK2B PE=4 SV=2	1	1	6	15000000		15000000	16000000	18000000	18000000	7500000	16750000	2.23333	1.1592	0.432219	0.364296	18000000	15500000	2.4	2.06667	1.26303	1.04731	4	FALSE	FALSE	TRUE	21	411	5.10949	Tnon_mito	CK2B|CK2N|CSK2B|G5A|P67870	ENSG00000204435
MAP1B	Microtubule-associated protein 1B OS=Homo sapiens GN=MAP1B PE=1 SV=2	24	24	77	25000000	20000000	22000000	20000000	23000000	24000000	22500000	22250000	0.988889	-0.0161197	0.937541	0.0280098	23500000	21000000	1.04444	0.933333	0.0627358	-0.0995357	4	FALSE	TRUE	TRUE	94	411	22.871	Tnon_mito	FUTSCH|MAP5|P46821	ENSG00000131711
UBR4	Isoform 2 of E3 ubiquitin-protein ligase UBR4 OS=Homo sapiens GN=UBR4	2	2	8			12000000	9700000	14000000	13000000	0	12175000	100	6.64386	0.000933787	3.02975	13500000	10850000	100	100	6.64386	6.64386	4	TRUE	FALSE	TRUE	36	411	8.75912	Tnon_mito	RBAF600|ZUBR1|p600|Q5T4S7	ENSG00000127481
GLE1	Nucleoporin GLE1 OS=Homo sapiens GN=GLE1 PE=1 SV=2	1	1	1			93000000				0	23250000	100	6.64386	0.391002	0.407821	0	46500000	0	100		6.64386	1	FALSE	FALSE	FALSE	6	411	1.45985	Tnon_mito	GLE1L|LCCS|LCCS1|hGLE1|Q53GS7	ENSG00000119392
BMS1	Ribosome biogenesis protein BMS1 homolog OS=Homo sapiens GN=BMS1 PE=1 SV=1	2	2	6	3400000	3400000	4000000		5300000	5100000	3400000	3600000	1.05882	0.0824622	0.881506	0.0547746	5200000	2000000	1.52941	0.588235	0.612977	-0.765535	3	FALSE	FALSE	TRUE	53	411	12.8954	Tnon_mito	BMS1L|Q14692	ENSG00000165733
NUP50	Nuclear pore complex protein Nup50 OS=Homo sapiens GN=NUP50 PE=1 SV=2	5	5	16	9000000	6000000	9700000	8700000	11000000	9400000	7500000	9700000	1.29333	0.371094	0.364665	0.438106	10200000	9200000	1.36	1.22667	0.443607	0.294743	4	FALSE	TRUE	TRUE	38	411	9.24574	Tnon_mito	NPAP60|NPAP60L|Q9UKX7	ENSG00000093000
XRN2	5'-3' exoribonuclease 2 OS=Homo sapiens GN=XRN2 PE=1 SV=1	12	12	69	32000000	36000000	30000000	27000000	29000000	32000000	34000000	29500000	0.867647	-0.20482	0.217129	0.663282	30500000	28500000	0.897059	0.838235	-0.156726	-0.254573	4	FALSE	TRUE	TRUE	97	411	23.601	Tnon_mito	Q9H0D6	ENSG00000088930
PRPF31	U4/U6 small nuclear ribonucleoprotein Prp31 OS=Homo sapiens GN=PRPF31 PE=1 SV=2	10	10	78	49000000	51000000	47000000	39000000	47000000	50000000	50000000	45750000	0.915	-0.128156	0.17606	0.754339	48500000	43000000	0.97	0.86	-0.0439433	-0.217591	4	FALSE	TRUE	TRUE	145	411	35.2798	Tnon_mito	NY-BR-99|PRP31|RP11|SNRNP61|Q8WWY3	ENSG00000105618
ANXA2	Isoform 2 of Annexin A2 OS=Homo sapiens GN=ANXA2	2	2	2	9000000						4500000	0	0		0.5	0.30103	0	0	0	0			0	FALSE	FALSE	FALSE	150	411	36.4964	Tnon_mito	ANX2|ANX2L4|CAL1H|HEL-S-270|LIP2|LPC2|LPC2D|P36|PAP-IV|P07355	ENSG00000182718
CLTC	Clathrin heavy chain 1 OS=Homo sapiens GN=CLTC PE=1 SV=5	34	34	140	14000000	15000000	28000000	23000000	26000000	30000000	14500000	26750000	1.84483	0.883486	0.00230183	2.63793	28000000	25500000	1.93103	1.75862	0.949374	0.814444	4	TRUE	TRUE	TRUE	180	411	43.7956	Tpossible_mito	CHC|CHC17|CLH-17|CLTCL2|Hc|Q00610	ENSG00000141367
RPLP1	60S acidic ribosomal protein P1 OS=Homo sapiens GN=RPLP1 PE=1 SV=1	3	4	44	72000000	62000000	56000000	75000000	85000000	96000000	67000000	78000000	1.16418	0.219313	0.326984	0.485474	90500000	65500000	1.35075	0.977612	0.433757	-0.0326662	4	FALSE	TRUE	TRUE	180	411	43.7956	Tnon_mito	LP1|P1|RPP1|P05386	ENSG00000137818
YWHAB	14-3-3 protein beta/alpha OS=Homo sapiens GN=YWHAB PE=1 SV=3	4	6	55	14000000	14000000	17000000	18000000	19000000	19000000	14000000	18250000	1.30357	0.38247	0.0030133	2.52096	19000000	17500000	1.35714	1.25	0.440573	0.321928	4	TRUE	TRUE	TRUE	146	411	35.5231	Tnon_mito	GW128|HEL-S-1|HS1|KCIP-1|YWHAA|P31946	ENSG00000166913
BASP1	Brain acid soluble protein 1 OS=Homo sapiens GN=BASP1 PE=1 SV=2	10	10	106	160000000	160000000	140000000	140000000	140000000	150000000	160000000	142500000	0.890625	-0.16711	0.00598626	2.22284	145000000	140000000	0.90625	0.875	-0.142019	-0.192645	4	TRUE	TRUE	TRUE	62	411	15.0852	Tnon_mito	CAP-23|CAP23|NAP-22|NAP22|P80723	ENSG00000176788
ESYT2	Isoform 6 of Extended synaptotagmin-2 OS=Homo sapiens GN=ESYT2	1	1	1				2400000			0	600000	100	6.64386	0.391002	0.407821	0	1200000	0	100		6.64386	1	FALSE	FALSE	FALSE	19	411	4.62287	Tnon_mito	CHR2SYT|E-Syt2|FAM62B|A0FGR8	ENSG00000117868
SACM1L	Phosphatidylinositide phosphatase SAC1 OS=Homo sapiens GN=SACM1L PE=1 SV=2	4	4	10			8200000	6800000	7200000	7000000	0	7300000	100	6.64386	0.000169273	3.77141	7100000	7500000	100	100	6.64386	6.64386	4	TRUE	TRUE	TRUE	6	411	1.45985	Tnon_mito	SAC1|Q9NTJ5	ENSG00000211456
IPO5	Importin-5 OS=Homo sapiens GN=IPO5 PE=1 SV=4	5	5	15			6600000	7200000	5700000	7300000	0	6700000	100	6.64386	0.000359803	3.44394	6500000	6900000	100	100	6.64386	6.64386	4	TRUE	TRUE	TRUE	80	411	19.4647	Tnon_mito	IMB3|KPNB3|Pse1|RANBP5|imp5|O00410	ENSG00000065150
RPL22	60S ribosomal protein L22 OS=Homo sapiens GN=RPL22 PE=1 SV=2	4	4	38	65000000	50000000	74000000	65000000	71000000	71000000	57500000	70250000	1.22174	0.288936	0.325606	0.487307	71000000	69500000	1.23478	1.2087	0.304257	0.273451	4	FALSE	TRUE	TRUE	192	411	46.7153	Tnon_mito	EAP|HBP15|HBP15/L22|L22|P35268	ENSG00000116251
RPL37A	60S ribosomal protein L37a OS=Homo sapiens GN=RPL37A PE=1 SV=2	3	3	42	43000000	42000000	37000000	35000000	41000000	45000000	42500000	39500000	0.929412	-0.10561	0.271282	0.566579	43000000	36000000	1.01176	0.847059	0.0168738	-0.239466	4	FALSE	TRUE	TRUE	98	411	23.8443	Tnon_mito	L37A|P61513	ENSG00000197756
VAPB	Vesicle-associated membrane protein-associated protein B/C OS=Homo sapiens GN=VAPB PE=1 SV=3	3	3	7			11000000	7200000	11000000	7400000	0	9150000	100	6.64386	0.0033501	2.47494	9200000	9100000	100	100	6.64386	6.64386	4	TRUE	TRUE	TRUE	28	411	6.81265	Tnon_mito	ALS8|VAMP-B|VAP-B|O95292	ENSG00000124164
DDOST	Dolichyl-diphosphooligosaccharide--protein glycosyltransferase 48 kDa subunit OS=Homo sapiens GN=DDOST PE=1 SV=4	4	4	11	5600000		6900000	12000000	11000000	12000000	2800000	10475000	3.74107	1.90345	0.180097	0.744493	11500000	9450000	4.10714	3.375	2.03814	1.75489	4	FALSE	TRUE	TRUE	59	411	14.3552	Tnon_mito	AGER1|CDG1R|OKSWcl45|OST|OST48|WBP1|P39656	ENSG00000244038
GGCX	Vitamin K-dependent gamma-carboxylase OS=Homo sapiens GN=GGCX PE=1 SV=2	2	2	3			4200000				0	1050000	100	6.64386	0.391002	0.407821	0	2100000	0	100		6.64386	1	FALSE	FALSE	FALSE	3	411	0.729927	Tnon_mito	VKCFD1|P38435	ENSG00000115486
DYNC1LI1	Cytoplasmic dynein 1 light intermediate chain 1 OS=Homo sapiens GN=DYNC1LI1 PE=1 SV=3	4	4	10	4700000		11000000	8300000	4700000	9700000	2350000	8425000	3.58511	1.84202	0.175232	0.756386	7200000	9650000	3.06383	4.10638	1.61534	2.03787	4	FALSE	TRUE	TRUE	36	411	8.75912	Tnon_mito	DNCLI1|LIC1|Q9Y6G9	ENSG00000144635
POLR2E	DNA-directed RNA polymerases I, II, and III subunit RPABC1 OS=Homo sapiens GN=POLR2E PE=1 SV=4	1	1	1						6700000	0	1675000	100	6.64386	0.391002	0.407821	3350000	0	100	0	6.64386		1	FALSE	FALSE	FALSE	61	411	14.8418	Tnon_mito	RPABC1|RPB5|XAP4|hRPB25|hsRPB5|P19388	ENSG00000099817
HOMER1	Homer protein homolog 1 OS=Homo sapiens GN=HOMER1 PE=1 SV=2	6	7	11	6800000	7100000			4900000	3500000	6950000	2100000	0.302158	-1.72662	0.0291126	1.53592	4200000	0	0.604317	0	-0.726624		2	TRUE	TRUE	TRUE	2	411	0.486618	Tnon_mito	HOMER|HOMER1A|HOMER1B|HOMER1C|SYN47|Ves-1|Q86YM7	ENSG00000152413
TEX264	Testis-expressed sequence 264 protein OS=Homo sapiens GN=TEX264 PE=1 SV=1	1	1	1			5700000				0	1425000	100	6.64386	0.391002	0.407821	0	2850000	0	100		6.64386	1	FALSE	FALSE	FALSE	1	411	0.243309	Tnon_mito	ZSIG11|Q9Y6I9	ENSG00000164081
GID8	Glucose-induced degradation protein 8 homolog OS=Homo sapiens GN=GID8 PE=1 SV=1	2	2	7	15000000	13000000	14000000	12000000	20000000	16000000	14000000	15500000	1.10714	0.146841	0.490695	0.309188	18000000	13000000	1.28571	0.928571	0.36257	-0.106915	4	FALSE	FALSE	TRUE	19	411	4.62287	Tnon_mito	C20orf11|TWA1|Q9NWU2	ENSG00000101193
NOP10	H/ACA ribonucleoprotein complex subunit 3 OS=Homo sapiens GN=NOP10 PE=1 SV=1	1	1	3			3300000		4000000	4100000	0	2850000	100	6.64386	0.0600868	1.22122	4050000	1650000	100	100	6.64386	6.64386	3	FALSE	FALSE	FALSE	16	411	3.89294	Tnon_mito	DKCB1|NOLA3|NOP10P|Q9NPE3	ENSG00000182117
NUS1	Nogo-B receptor OS=Homo sapiens GN=NUS1 PE=1 SV=1	2	2	2			5700000			5800000	0	2875000	100	6.64386	0.181714	0.740611	2900000	2850000	100	100	6.64386	6.64386	2	FALSE	FALSE	FALSE	0	411	0	Tnon_mito	C6orf68|MGC:7199|NgBR|TANGO14|Q96E22	ENSG00000153989
YBX1	Nuclease-sensitive element-binding protein 1 OS=Homo sapiens GN=YBX1 PE=1 SV=3	8	12	140	120000000	110000000	110000000	89000000	140000000	140000000	115000000	119750000	1.0413	0.0583918	0.742337	0.129399	140000000	99500000	1.21739	0.865217	0.283793	-0.208865	4	FALSE	TRUE	TRUE	233	411	56.691	Tpossible_mito	BP-8|CSDA2|CSDB|DBPB|MDR-NF1|NSEP-1|NSEP1|YB-1|YB1|P67809	ENSG00000065978
YBX3	Y-box-binding protein 3 OS=Homo sapiens GN=YBX3 PE=1 SV=4	7	11	85	59000000	50000000	61000000	37000000	59000000	45000000	54500000	50500000	0.926606	-0.109973	0.614981	0.211139	52000000	49000000	0.954128	0.899083	-0.0677446	-0.153474	4	FALSE	TRUE	TRUE	179	411	43.5523	Tnon_mito	CSDA|CSDA1|DBPA|ZONAB|P16989	ENSG00000060138
SRSF8	Serine/arginine-rich splicing factor 8 OS=Homo sapiens GN=SRSF8 PE=1 SV=1	1	1	4	6800000	6300000		5000000		5800000	6550000	2700000	0.412214	-1.27854	0.089648	1.04746	2900000	2500000	0.442748	0.381679	-1.17544	-1.38957	2	FALSE	FALSE	FALSE				Tnon_mito	DSM-1|SFRS2B|SRP46|Q9BRL6	ENSG00000271885
NAP1L1	Nucleosome assembly protein 1-like 1 OS=Homo sapiens GN=NAP1L1 PE=1 SV=1	5	6	60	30000000	37000000	42000000	48000000	51000000	53000000	33500000	48500000	1.44776	0.533824	0.0709353	1.14914	52000000	45000000	1.55224	1.34328	0.634351	0.425764	4	FALSE	TRUE	TRUE	152	411	36.983	Tnon_mito	NAP1|NAP1L|NRP|P55209	ENSG00000187109
PSMD1	26S proteasome non-ATPase regulatory subunit 1 OS=Homo sapiens GN=PSMD1 PE=1 SV=2	24	24	133	30000000	25000000	53000000	57000000	66000000	67000000	27500000	60750000	2.20909	1.14345	0.00174835	2.75737	66500000	55000000	2.41818	2	1.27392	1	4	TRUE	TRUE	TRUE	102	411	24.8175	Tnon_mito	P112|Rpn2|S1|Q99460	ENSG00000173692
PSMD4	26S proteasome non-ATPase regulatory subunit 4 OS=Homo sapiens GN=PSMD4 PE=1 SV=1	9	9	72	20000000	22000000	40000000	37000000	45000000	43000000	21000000	41250000	1.96429	0.974005	0.000552151	3.25794	44000000	38500000	2.09524	1.83333	1.06711	0.874469	4	TRUE	TRUE	TRUE	73	411	17.7616	Tnon_mito	AF|AF-1|ASF|MCB1|Rpn10|S5A|pUB-R5|P55036	ENSG00000159352
EIF3C	Eukaryotic translation initiation factor 3 subunit C OS=Homo sapiens GN=EIF3C PE=1 SV=1	20	20	158	70000000	83000000	61000000	53000000	63000000	61000000	76500000	59500000	0.777778	-0.36257	0.203642	0.691132	62000000	57000000	0.810458	0.745098	-0.303192	-0.424498	4	FALSE	TRUE	TRUE	109	411	26.5207	Tnon_mito	EIF3CL|EIF3S8|eIF3-p110|Q99613	ENSG00000184110
LMAN1	Protein ERGIC-53 OS=Homo sapiens GN=LMAN1 PE=1 SV=2	1	1	2	5100000	4600000					4850000	0	0		0.0327864	1.48431	0	0	0	0			0	TRUE	FALSE	FALSE	16	411	3.89294	Tnon_mito	ERGIC-53|ERGIC53|F5F8D|FMFD1|MCFD1|MR60|gp58|P49257	ENSG00000074695
SERPINH1	Serpin H1 OS=Homo sapiens GN=SERPINH1 PE=1 SV=2	2	2	11	8200000	7800000	5700000	9500000	6800000	7100000	8000000	7275000	0.909375	-0.137053	0.43805	0.358477	6950000	7600000	0.86875	0.95	-0.202987	-0.0740006	4	FALSE	FALSE	TRUE	78	411	18.9781	Tnon_mito	AsTP3|CBP1|CBP2|HSP47|OI10|PPROM|RA-A47|SERPINH2|gp46|P50454	ENSG00000149257
ITGB1	Integrin beta-1 OS=Homo sapiens GN=ITGB1 PE=1 SV=2	4	4	19	3600000	2900000	8800000	7500000	8500000	8600000	3250000	8350000	2.56923	1.36134	0.00358019	2.44609	8550000	8150000	2.63077	2.50769	1.39548	1.32636	4	TRUE	TRUE	TRUE	26	411	6.32603	Tnon_mito	CD29|FNRB|GPIIA|MDF2|MSK12|VLA-BETA|VLAB|P05556	ENSG00000150093
PPP2R1A	Serine/threonine-protein phosphatase 2A 65 kDa regulatory subunit A alpha isoform OS=Homo sapiens GN=PPP2R1A PE=1 SV=4	14	14	64	15000000	15000000	15000000	16000000	22000000	22000000	15000000	18750000	1.25	0.321928	0.141122	0.850405	22000000	15500000	1.46667	1.03333	0.552541	0.0473057	4	FALSE	TRUE	TRUE	132	411	32.1168	Tpossible_mito	PP2A-Aalpha|PP2AAALPHA|PR65A|P30153	ENSG00000105568
RPN2	Dolichyl-diphosphooligosaccharide--protein glycosyltransferase subunit 2 OS=Homo sapiens GN=RPN2 PE=1 SV=3	6	6	18	6000000	3600000	9100000	11000000	15000000	12000000	4800000	11775000	2.45312	1.29462	0.0257167	1.58978	13500000	10050000	2.8125	2.09375	1.49185	1.06609	4	TRUE	TRUE	TRUE	82	411	19.9513	Tnon_mito	RIBIIR|RPN-II|RPNII|SWP1|P04844	ENSG00000118705
SEP15	15 kDa selenoprotein OS=Homo sapiens GN=SEP15 PE=1 SV=3	3	3	7			3600000	3600000	4500000	4200000	0	3975000	100	6.64386	0.000395385	3.40298	4350000	3600000	100	100	6.64386	6.64386	4	TRUE	TRUE	TRUE	0	411	0	Tnon_mito	O60613	ENSG00000183291
RTN4	Isoform 2 of Reticulon-4 OS=Homo sapiens GN=RTN4	5	5	22	8100000	27000000	21000000	33000000	40000000	13000000	17550000	26750000	1.52422	0.608068	0.502949	0.298476	26500000	27000000	1.50997	1.53846	0.594521	0.621488	4	FALSE	TRUE	TRUE	64	411	15.5718	Tnon_mito	ASY|NI220/250|NOGO|NOGO-A|NOGOC|NSP|NSP-CL|Nbla00271|Nbla10545|Nogo-B|Nogo-C|RTN-X|RTN4-A|RTN4-B1|RTN4-B2|RTN4-C|Q9NQC3	ENSG00000115310
ACTG1	Actin, cytoplasmic 2, N-terminally processed (Fragment) OS=Homo sapiens GN=ACTG1 PE=3 SV=1	2	9	155	200000000	260000000	110000000	150000000	96000000	99000000	230000000	113750000	0.494565	-1.01577	0.1193	0.923359	97500000	130000000	0.423913	0.565217	-1.23816	-0.823122	4	FALSE	FALSE	TRUE	363	411	88.3212	Tnon_mito	ACT|ACTG|BRWS2|DFNA20|DFNA26|HEL-176|P63261	ENSG00000184009
CFL1	Cofilin-1 OS=Homo sapiens GN=CFL1 PE=2 SV=1	5	5	28	18000000	21000000	17000000	18000000	15000000	18000000	19500000	17000000	0.871795	-0.197939	0.311302	0.506818	16500000	17500000	0.846154	0.897436	-0.241008	-0.156119	4	FALSE	TRUE	TRUE	196	411	47.6886	Tnon_mito	CFL|HEL-S-15|P23528	ENSG00000172757
PFN1	Profilin-1 OS=Homo sapiens GN=PFN1 PE=1 SV=2	3	3	9	10000000	13000000	16000000	8000000	16000000	13000000	11500000	13250000	1.15217	0.204358	0.511875	0.290836	14500000	12000000	1.26087	1.04348	0.334419	0.0614005	4	FALSE	TRUE	TRUE	148	411	36.0097	Tnon_mito	ALS18|P07737	ENSG00000108518
RPL30	60S ribosomal protein L30 OS=Homo sapiens GN=RPL30 PE=1 SV=2	4	4	19	9300000	13000000	16000000	17000000	16000000	13000000	11150000	15500000	1.39013	0.475225	0.211718	0.674243	14500000	16500000	1.30045	1.47982	0.379009	0.565422	4	FALSE	TRUE	TRUE	111	411	27.0073	Tnon_mito	L30|P62888	ENSG00000156482
RPLP2	60S acidic ribosomal protein P2 OS=Homo sapiens GN=RPLP2 PE=1 SV=1	6	7	100	250000000	210000000	240000000	250000000	330000000	330000000	230000000	287500000	1.25	0.321928	0.152366	0.817113	330000000	245000000	1.43478	1.06522	0.520832	0.0911479	4	FALSE	TRUE	TRUE	215	411	52.3114	Tnon_mito	D11S2243E|LP2|P2|RPP2|P05387	ENSG00000177600
RPS10	40S ribosomal protein S10 OS=Homo sapiens GN=RPS10 PE=1 SV=1	7	7	124	210000000	250000000	160000000	190000000	210000000	230000000	230000000	197500000	0.858696	-0.219781	0.312574	0.505048	220000000	175000000	0.956522	0.76087	-0.0641303	-0.394279	4	FALSE	TRUE	TRUE	177	411	43.0657	Tnon_mito	DBA9|S10|P46783	ENSG00000124614
YWHAG	14-3-3 protein gamma OS=Homo sapiens GN=YWHAG PE=1 SV=2	4	6	51	30000000	36000000	25000000	39000000	35000000	32000000	33000000	32750000	0.992424	-0.0109711	0.956442	0.0193414	33500000	32000000	1.01515	0.969697	0.0216951	-0.0443941	4	FALSE	TRUE	TRUE	131	411	31.8735	Tnon_mito	14-3-3GAMMA|P61981	ENSG00000170027
YWHAZ	14-3-3 protein zeta/delta OS=Homo sapiens GN=YWHAZ PE=1 SV=1	5	7	70	18000000	20000000	22000000	22000000	29000000	30000000	19000000	25750000	1.35526	0.438573	0.0495021	1.30538	29500000	22000000	1.55263	1.15789	0.634716	0.211504	4	TRUE	TRUE	TRUE	180	411	43.7956	Tpossible_mito	14-3-3-zeta|HEL-S-3|HEL4|KCIP-1|YWHAD|P63104	ENSG00000164924
DSTN	Destrin OS=Homo sapiens GN=DSTN PE=1 SV=3	1	1	2	1200000				1900000		600000	475000	0.791667	-0.337035	0.883293	0.0538952	950000	0	1.58333	0	0.662965		1	FALSE	FALSE	FALSE	42	411	10.219	Tnon_mito	ACTDP|ADF|HEL32|bA462D18.2|P60981	ENSG00000125868
RPL34	60S ribosomal protein L34 OS=Homo sapiens GN=RPL34 PE=1 SV=3	1	1	5	38000000	32000000	49000000			46000000	35000000	23750000	0.678571	-0.559427	0.477372	0.321143	23000000	24500000	0.657143	0.7	-0.605721	-0.514573	2	FALSE	FALSE	TRUE	84	411	20.438	Tmito	L34|P49207	ENSG00000109475
SNRPE	Small nuclear ribonucleoprotein E OS=Homo sapiens GN=SNRPE PE=1 SV=1	3	3	29	48000000	53000000	39000000	30000000	36000000	39000000	50500000	36000000	0.712871	-0.488286	0.0305568	1.51489	37500000	34500000	0.742574	0.683168	-0.429393	-0.549687	4	TRUE	TRUE	TRUE	93	411	22.6277	Tnon_mito	B-raf|HYPT11|SME|Sm-E|P62304	ENSG00000182004
LIMA1	Isoform 4 of LIM domain and actin-binding protein 1 OS=Homo sapiens GN=LIMA1	17	17	71	46000000	36000000	11000000	16000000	12000000	14000000	41000000	13250000	0.323171	-1.62963	0.100128	0.999446	13000000	13500000	0.317073	0.329268	-1.65711	-1.60266	4	FALSE	TRUE	TRUE	76	411	18.4915	Tnon_mito	EPLIN|SREBP3|Q9UHB6	ENSG00000050405
CCAR2	Cell cycle and apoptosis regulator protein 2 OS=Homo sapiens GN=CCAR2 PE=1 SV=2	6	6	9	9200000	10000000			7000000		9600000	1750000	0.182292	-2.45568	0.018188	1.74022	3500000	0	0.364583	0	-1.45568		1	TRUE	TRUE	TRUE	118	411	28.7105	Tpossible_mito	DBC-1|DBC1|KIAA1967|NET35|p30 DBC|p30DBC|Q8N163	ENSG00000158941
AP2A1	AP-2 complex subunit alpha-1 OS=Homo sapiens GN=AP2A1 PE=1 SV=3	1	1	1						4800000	0	1200000	100	6.64386	0.391002	0.407821	2400000	0	100	0	6.64386		1	FALSE	FALSE	FALSE	24	411	5.83942	Tnon_mito	ADTAA|AP2-ALPHA|CLAPA1|O95782	ENSG00000196961
AP2B1	Isoform 2 of AP-2 complex subunit beta OS=Homo sapiens GN=AP2B1	2	2	7	6200000		6700000	3400000	8000000	6400000	3100000	6125000	1.97581	0.982442	0.500661	0.300457	7200000	5050000	2.32258	1.62903	1.21573	0.704015	4	FALSE	FALSE	TRUE	54	411	13.1387	Tnon_mito	ADTB2|AP105B|AP2-BETA|CLAPB1|P63010	ENSG00000006125
CALR	Calreticulin OS=Homo sapiens GN=CALR PE=1 SV=1	8	8	46	25000000	24000000	38000000	31000000	28000000	31000000	24500000	32000000	1.30612	0.38529	0.0353478	1.45164	29500000	34500000	1.20408	1.40816	0.267933	0.493815	4	TRUE	TRUE	TRUE	114	411	27.7372	Tnon_mito	CRT|HEL-S-99n|RO|SSA|cC1qR|P27797	ENSG00000179218
HPRT1	Hypoxanthine-guanine phosphoribosyltransferase OS=Homo sapiens GN=HPRT1 PE=1 SV=2	1	1	1					3900000		0	975000	100	6.64386	0.391002	0.407821	1950000	0	100	0	6.64386		1	FALSE	FALSE	FALSE	46	411	11.1922	Tnon_mito	HGPRT|HPRT|P00492	ENSG00000165704
STMN1	Isoform 2 of Stathmin OS=Homo sapiens GN=STMN1	2	2	23	15000000	12000000	11000000	5000000	19000000	18000000	13500000	13250000	0.981481	-0.026967	0.948106	0.0231429	18500000	8000000	1.37037	0.592593	0.454566	-0.754888	4	FALSE	FALSE	TRUE	78	411	18.9781	Tnon_mito	C1orf215|LAP18|Lag|OP18|PP17|PP19|PR22|SMN|P16949	ENSG00000117632
RPL6	60S ribosomal protein L6 OS=Homo sapiens GN=RPL6 PE=1 SV=3	12	12	36	30000000	25000000	30000000	35000000	25000000	36000000	27500000	31500000	1.14545	0.19592	0.341913	0.466084	30500000	32500000	1.10909	1.18182	0.149378	0.241008	4	FALSE	TRUE	TRUE	172	411	41.8491	Tnon_mito	L6|SHUJUN-2|TAXREB107|TXREB1|Q02878	ENSG00000089009
RPL7A	60S ribosomal protein L7a OS=Homo sapiens GN=RPL7A PE=1 SV=2	4	4	15	16000000	14000000	11000000	14000000	19000000	15000000	15000000	14750000	0.983333	-0.0242475	0.903253	0.0441904	17000000	12500000	1.13333	0.833333	0.180572	-0.263034	4	FALSE	TRUE	TRUE	197	411	47.9319	Tnon_mito	L7A|SURF3|TRUP|P62424	ENSG00000148303
RPL15	60S ribosomal protein L15 OS=Homo sapiens GN=RPL15 PE=1 SV=2	5	5	16	10000000	11000000	13000000	12000000	18000000	20000000	10500000	15750000	1.5	0.584963	0.0692784	1.1594	19000000	12500000	1.80952	1.19048	0.85561	0.251539	4	FALSE	TRUE	TRUE	149	411	36.253	Tnon_mito	DBA12|EC45|L15|RPL10|RPLY10|RPYL10|P61313	ENSG00000174748
RPL18A	60S ribosomal protein L18a OS=Homo sapiens GN=RPL18A PE=1 SV=2	3	3	12	9700000	9700000	13000000	11000000	13000000	14000000	9700000	12750000	1.31443	0.394441	0.0167499	1.77599	13500000	12000000	1.39175	1.23711	0.476903	0.306978	4	TRUE	TRUE	TRUE	113	411	27.4939	Tnon_mito	L18A|Q02543	ENSG00000105640
RPL24	60S ribosomal protein L24 OS=Homo sapiens GN=RPL24 PE=1 SV=1	5	5	37	81000000	99000000	65000000	70000000	82000000	82000000	90000000	74750000	0.830556	-0.267851	0.305399	0.515132	82000000	67500000	0.911111	0.75	-0.134301	-0.415037	4	FALSE	TRUE	TRUE	195	411	47.4453	Tnon_mito	HEL-S-310|L24|P83731	ENSG00000114391
RPL38	60S ribosomal protein L38 OS=Homo sapiens GN=RPL38 PE=1 SV=2	3	3	41	61000000	84000000	81000000	75000000	53000000	63000000	72500000	68000000	0.937931	-0.0924462	0.770124	0.11344	58000000	78000000	0.8	1.07586	-0.321928	0.105493	4	FALSE	TRUE	TRUE	139	411	33.82	Tnon_mito	L38|P63173	ENSG00000172809
RPN1	Dolichyl-diphosphooligosaccharide--protein glycosyltransferase subunit 1 OS=Homo sapiens GN=RPN1 PE=1 SV=1	10	10	40	5100000	6200000	16000000	15000000	18000000	19000000	5650000	17000000	3.00885	1.58921	0.000443535	3.35307	18500000	15500000	3.27434	2.74336	1.7112	1.45595	4	TRUE	TRUE	TRUE	91	411	22.1411	Tnon_mito	OST1|RBPH1|P04843	ENSG00000163902
RPS3A	40S ribosomal protein S3a OS=Homo sapiens GN=RPS3A PE=1 SV=2	11	11	125	300000000	260000000	220000000	170000000	270000000	240000000	280000000	225000000	0.803571	-0.315502	0.149926	0.824122	255000000	195000000	0.910714	0.696429	-0.13493	-0.521953	4	FALSE	TRUE	TRUE	203	411	49.3917	Tnon_mito	FTE1|MFTL|S3A|P61247	ENSG00000145425
RPS7	40S ribosomal protein S7 OS=Homo sapiens GN=RPS7 PE=1 SV=1	8	8	65	130000000	160000000	96000000	92000000	110000000	140000000	145000000	109500000	0.755172	-0.405122	0.18753	0.726929	125000000	94000000	0.862069	0.648276	-0.214125	-0.62532	4	FALSE	TRUE	TRUE	200	411	48.6618	Tnon_mito	DBA8|S7|P62081	ENSG00000171863
RPS8	40S ribosomal protein S8 OS=Homo sapiens GN=RPS8 PE=1 SV=2	10	10	110	140000000	120000000	110000000	99000000	130000000	110000000	130000000	112250000	0.863462	-0.211796	0.28075	0.55168	120000000	104500000	0.923077	0.803846	-0.115477	-0.315009	4	FALSE	TRUE	TRUE	228	411	55.4745	Tnon_mito	S8|P62241	ENSG00000142937
RPS12	40S ribosomal protein S12 OS=Homo sapiens GN=RPS12 PE=1 SV=3	7	7	90	210000000	260000000	190000000	190000000	210000000	250000000	235000000	210000000	0.893617	-0.162271	0.490222	0.309607	230000000	190000000	0.978723	0.808511	-0.0310269	-0.306661	4	FALSE	TRUE	TRUE	154	411	37.4696	Tnon_mito	S12|P25398	ENSG00000112306
RPS19	40S ribosomal protein S19 OS=Homo sapiens GN=RPS19 PE=1 SV=2	6	6	81	330000000	330000000	200000000	210000000	260000000	270000000	330000000	235000000	0.712121	-0.489805	0.0123833	1.90716	265000000	205000000	0.80303	0.621212	-0.316474	-0.686842	4	TRUE	TRUE	TRUE	181	411	44.0389	Tnon_mito	DBA|DBA1|S19|P39019	ENSG00000105372
RPS21	40S ribosomal protein S21 OS=Homo sapiens GN=RPS21 PE=1 SV=1	4	4	75	190000000	160000000	130000000	130000000	180000000	170000000	175000000	152500000	0.871429	-0.198546	0.352179	0.453236	175000000	130000000	1	0.742857	0	-0.428843	4	FALSE	TRUE	TRUE	115	411	27.9805	Tnon_mito	S21|P63220	ENSG00000171858
RPS25	40S ribosomal protein S25 OS=Homo sapiens GN=RPS25 PE=1 SV=1	3	3	52	600000000	670000000	390000000	370000000	430000000	440000000	635000000	407500000	0.641732	-0.639957	0.0537914	1.26929	435000000	380000000	0.685039	0.598425	-0.545741	-0.740757	4	FALSE	TRUE	TRUE	196	411	47.6886	Tnon_mito	S25|P62851	ENSG00000118181
RPS26	40S ribosomal protein S26 OS=Homo sapiens GN=RPS26 PE=1 SV=3	4	4	46	180000000	170000000	140000000	130000000	160000000	160000000	175000000	147500000	0.842857	-0.24664	0.0388843	1.41023	160000000	135000000	0.914286	0.771429	-0.129283	-0.374396	4	TRUE	TRUE	TRUE	157	411	38.1995	Tnon_mito	DBA10|S26|P62854	ENSG00000197728
RPS27A	Ubiquitin-40S ribosomal protein S27a OS=Homo sapiens GN=RPS27A PE=1 SV=2	5	5	49	72000000	79000000	78000000	91000000	97000000	91000000	75500000	89250000	1.18212	0.241376	0.0719009	1.14327	94000000	84500000	1.24503	1.11921	0.316184	0.162475	4	FALSE	TRUE	TRUE	235	411	57.1776	Tnon_mito	CEP80|HEL112|S27A|UBA80|UBC|UBCEP1|UBCEP80|P62979	ENSG00000143947
S100A8	Protein S100-A8 OS=Homo sapiens GN=S100A8 PE=1 SV=1	2	2	6	10000000	5300000	9800000	8800000	12000000	13000000	7650000	10900000	1.42484	0.510796	0.377359	0.423245	12500000	9300000	1.63399	1.21569	0.708396	0.281771	4	FALSE	FALSE	TRUE	57	411	13.8686	Tnon_mito	60B8AG|CAGA|CFAG|CGLA|CP-10|L1Ag|MA387|MIF|MRP8|NIF|P8|P05109	ENSG00000143546
SNCA	Alpha-synuclein OS=Homo sapiens GN=SNCA PE=1 SV=1	2	2	3			7700000	6200000		5100000	0	4750000	100	6.64386	0.0654672	1.18398	2550000	6950000	100	100	6.64386	6.64386	3	FALSE	FALSE	FALSE	48	411	11.6788	Tpossible_mito	NACP|PARK1|PARK4|PD1|P37840	ENSG00000145335
TCEB2	Isoform 2 of Transcription elongation factor B polypeptide 2 OS=Homo sapiens GN=TCEB2	2	2	7	13000000		19000000	18000000	26000000	26000000	6500000	22250000	3.42308	1.77529	0.222087	0.653477	26000000	18500000	4	2.84615	2	1.50901	4	FALSE	FALSE	TRUE	18	411	4.37956	Tnon_mito	ELOB|SIII|Q15370	ENSG00000103363
TPM3	Tropomyosin alpha-3 chain OS=Homo sapiens GN=TPM3 PE=2 SV=1	2	4	25	20000000	12000000	16000000	14000000	16000000		16000000	11500000	0.71875	-0.476438	0.479522	0.319192	8000000	15000000	0.5	0.9375	-1	-0.0931094	3	FALSE	FALSE	TRUE	136	411	33.09	Tnon_mito	CAPM1|CFTD|HEL-189|HEL-S-82p|NEM1|OK/SW-cl.5|TM-5|TM3|TM30|TM30nm|TM5|TPMsk3|TRK|hscp30|P06753	ENSG00000143549
TPM3	Isoform 2 of Tropomyosin alpha-3 chain OS=Homo sapiens GN=TPM3	4	6	46	26000000	22000000	21000000	20000000	23000000	20000000	24000000	21000000	0.875	-0.192645	0.354848	0.449958	21500000	20500000	0.895833	0.854167	-0.158698	-0.22741	4	FALSE	TRUE	TRUE	136	411	33.09	Tnon_mito	CAPM1|CFTD|HEL-189|HEL-S-82p|NEM1|OK/SW-cl.5|TM-5|TM3|TM30|TM30nm|TM5|TPMsk3|TRK|hscp30|P06753	ENSG00000143549
YWHAE	14-3-3 protein epsilon OS=Homo sapiens GN=YWHAE PE=1 SV=1	11	13	116	37000000	38000000	59000000	48000000	61000000	61000000	37500000	57250000	1.52667	0.610385	0.00713576	2.14656	61000000	53500000	1.62667	1.42667	0.701919	0.512648	4	TRUE	TRUE	TRUE	186	411	45.2555	Tpossible_mito	14-3-3E|HEL2|KCIP-1|MDCR|MDS|P62258	ENSG00000108953
YWHAH	14-3-3 protein eta OS=Homo sapiens GN=YWHAH PE=1 SV=4	5	7	55	7600000	8200000	14000000	11000000	15000000	14000000	7900000	13500000	1.70886	0.773035	0.00505288	2.29646	14500000	12500000	1.83544	1.58228	0.876128	0.662004	4	TRUE	TRUE	TRUE	117	411	28.4672	Tnon_mito	YWHA1|Q04917	ENSG00000128245
SEC22B	Vesicle-trafficking protein SEC22b OS=Homo sapiens GN=SEC22B PE=1 SV=4	3	3	12	9600000	7600000	20000000	16000000	15000000	22000000	8600000	18250000	2.12209	1.08549	0.00754015	2.12262	18500000	18000000	2.15116	2.09302	1.10512	1.06559	4	TRUE	TRUE	TRUE				Tnon_mito	ERS-24|SEC22L1|O75396	ENSG00000265808
EIF1	Eukaryotic translation initiation factor 1 OS=Homo sapiens GN=EIF1 PE=2 SV=1	1	5	36	4200000	7000000		4300000	4200000	5600000	5600000	3525000	0.629464	-0.667804	0.356296	0.448189	4900000	2150000	0.875	0.383929	-0.192645	-1.38109	3	FALSE	FALSE	TRUE	29	411	7.05596	Tnon_mito	A121|EIF-1|EIF1A|ISO1|SUI1|P41567	ENSG00000173812
YWHAQ	14-3-3 protein theta OS=Homo sapiens GN=YWHAQ PE=1 SV=1	5	7	73	13000000	13000000	20000000	18000000	20000000	22000000	13000000	20000000	1.53846	0.621488	0.00333555	2.47683	21000000	19000000	1.61538	1.46154	0.691878	0.547488	4	TRUE	TRUE	TRUE	153	411	37.2263	Tnon_mito	14-3-3|1C5|HS1|P27348	ENSG00000134308
UGGT1	UDP-glucose:glycoprotein glucosyltransferase 1 OS=Homo sapiens GN=UGGT1 PE=1 SV=3	13	13	28	5600000	6300000	8000000	8300000	9600000	9900000	5950000	8950000	1.5042	0.588998	0.00806044	2.09364	9750000	8150000	1.63866	1.36975	0.712513	0.45391	4	TRUE	TRUE	TRUE	15	411	3.64964	Tnon_mito	HUGT1|UGCGL1|UGT1|Q9NYU2	ENSG00000136731
ACTBL2	Beta-actin-like protein 2 OS=Homo sapiens GN=ACTBL2 PE=1 SV=2	1	4	76	4300000						2150000	0	0		0.5	0.30103	0	0	0	0			0	FALSE	FALSE	TRUE	329	411	80.0487	Tnon_mito	ACT|Q562R1	ENSG00000169067
TSSC4	Protein TSSC4 OS=Homo sapiens GN=TSSC4 PE=1 SV=3	1	1	1				2600000			0	650000	100	6.64386	0.391002	0.407821	0	1300000	0	100		6.64386	1	FALSE	FALSE	FALSE	0	411	0	Tnon_mito	Q9Y5U2	ENSG00000184281
B3GNT1	N-acetyllactosaminide beta-1,3-N-acetylglucosaminyltransferase OS=Homo sapiens GN=B3GNT1 PE=1 SV=1	1	1	1			7700000				0	1925000	100	6.64386	0.391002	0.407821	0	3850000	0	100		6.64386	1	FALSE	FALSE	FALSE	0	411	0	Tnon_mito	B3GN-T1|B3GNT6|BETA3GNTI|MDDGA13|iGAT|iGNT|O43505	ENSG00000174684
PDAP1	28 kDa heat- and acid-stable phosphoprotein OS=Homo sapiens GN=PDAP1 PE=1 SV=1	3	3	39	59000000	51000000	48000000	44000000	63000000	54000000	55000000	52250000	0.95	-0.0740006	0.664211	0.177694	58500000	46000000	1.06364	0.836364	0.089005	-0.257798	4	FALSE	TRUE	TRUE	84	411	20.438	Tnon_mito	HASPP28|PAP|PAP1|Q13442	ENSG00000106244
C19orf43	Uncharacterized protein C19orf43 OS=Homo sapiens GN=C19orf43 PE=1 SV=1	1	1	1		9900000					4950000	0	0		0.5	0.30103	0	0	0	0			0	FALSE	FALSE	FALSE	65	411	15.8151	Tnon_mito	fSAP18|Q9BQ61	ENSG00000123144
FHL1	Four and a half LIM domains protein 1 OS=Homo sapiens GN=FHL1 PE=1 SV=4	1	1	5	6300000	5300000		6300000	9000000	7300000	5800000	5650000	0.974138	-0.037802	0.945192	0.0244799	8150000	3150000	1.40517	0.543103	0.490747	-0.880701	3	FALSE	FALSE	TRUE	35	411	8.51582	Tnon_mito	FHL-1|FHL1A|FHL1B|FLH1A|KYOT|SLIM|SLIM-1|SLIM1|SLIMMER|XMPMA|Q13642	ENSG00000022267
PSMD7	26S proteasome non-ATPase regulatory subunit 7 OS=Homo sapiens GN=PSMD7 PE=1 SV=2	8	8	53	21000000	25000000	26000000	26000000	25000000	36000000	23000000	28250000	1.22826	0.296617	0.18991	0.721453	30500000	26000000	1.32609	1.13043	0.407175	0.176878	4	FALSE	TRUE	TRUE	72	411	17.5182	Tnon_mito	MOV34|P40|Rpn8|S12|P51665	ENSG00000103035
EIF3A	Eukaryotic translation initiation factor 3 subunit A OS=Homo sapiens GN=EIF3A PE=1 SV=1	40	40	338	75000000	67000000	64000000	52000000	64000000	55000000	71000000	58750000	0.827465	-0.27323	0.120841	0.917787	59500000	58000000	0.838028	0.816901	-0.254929	-0.291766	4	FALSE	TRUE	TRUE	111	411	27.0073	Tnon_mito	EIF3|EIF3S10|P167|TIF32|eIF3-p170|eIF3-theta|p180|p185|Q14152	ENSG00000107581
TRDN	Triadin (Fragment) OS=Homo sapiens GN=TRDN PE=4 SV=1	1	1	1				9800000			0	2450000	100	6.64386	0.391002	0.407821	0	4900000	0	100		6.64386	1	FALSE	FALSE	FALSE	0	411	0	Tnon_mito	CPVT5|TDN|TRISK|Q13061	ENSG00000186439
LSM14B	Protein LSM14 homolog B OS=Homo sapiens GN=LSM14B PE=1 SV=1	10	10	47	20000000	22000000	23000000	35000000	33000000	36000000	21000000	31750000	1.5119	0.596367	0.0319743	1.4952	34500000	29000000	1.64286	1.38095	0.716207	0.465664	4	TRUE	TRUE	TRUE	15	411	3.64964	Tnon_mito	C20orf40|FAM61B|LSM13|RAP55B|bA11M20.3|Q9BX40	ENSG00000149657
ADD3	Gamma-adducin OS=Homo sapiens GN=ADD3 PE=1 SV=1	1	1	6	6900000	6400000	5500000	4100000	5000000	5100000	6650000	4925000	0.740602	-0.433231	0.0152649	1.81631	5050000	4800000	0.759398	0.721805	-0.397071	-0.47032	4	TRUE	FALSE	TRUE	30	411	7.29927	Tnon_mito	ADDL|Q9UEY8	ENSG00000148700
SRP54	Signal recognition particle 54 kDa protein OS=Homo sapiens GN=SRP54 PE=1 SV=1	7	7	15	9800000	8400000	15000000	7900000	15000000	13000000	9100000	12725000	1.39835	0.483727	0.12054	0.91887	14000000	11450000	1.53846	1.25824	0.621488	0.331409	4	FALSE	TRUE	TRUE	36	411	8.75912	Tnon_mito	P61011	ENSG00000100883
BYSL	Bystin (Fragment) OS=Homo sapiens GN=BYSL PE=4 SV=1	1	1	1			4300000				0	1075000	100	6.64386	0.391002	0.407821	0	2150000	0	100		6.64386	1	FALSE	FALSE	FALSE	56	411	13.6253	Tnon_mito	BYSTIN|Q13895	ENSG00000112578
BYSL	Bystin OS=Homo sapiens GN=BYSL PE=1 SV=3	2	2	10	4500000	3400000	6700000	5600000	7000000	8400000	3950000	6925000	1.75316	0.809961	0.0309534	1.50929	7700000	6150000	1.94937	1.55696	0.963006	0.638734	4	TRUE	FALSE	TRUE	56	411	13.6253	Tnon_mito	BYSTIN|Q13895	ENSG00000112578
EIF1AX	Eukaryotic translation initiation factor 1A, X-chromosomal OS=Homo sapiens GN=EIF1AX PE=1 SV=2	3	3	15	17000000	21000000	29000000	14000000	18000000	14000000	19000000	18750000	0.986842	-0.0191088	0.953965	0.0204675	16000000	21500000	0.842105	1.13158	-0.247928	0.178337	4	FALSE	TRUE	TRUE	77	411	18.7348	Tnon_mito	EIF1A|EIF1AP1|EIF4C|eIF-1A|eIF-4C|P47813	ENSG00000173674
EPB41	Protein 4.1 OS=Homo sapiens GN=EPB41 PE=1 SV=4	1	1	1	4300000						2150000	0	0		0.5	0.30103	0	0	0	0			0	FALSE	FALSE	FALSE	36	411	8.75912	Tnon_mito	4.1R|EL1|HE|P11171	ENSG00000159023
EIF6	Eukaryotic translation initiation factor 6 OS=Homo sapiens GN=EIF6 PE=1 SV=1	2	2	5	11000000	5900000			9600000	7600000	8450000	4300000	0.508876	-0.974615	0.331536	0.479469	8600000	0	1.01775	0	0.0253853		2	FALSE	FALSE	TRUE	85	411	20.6813	Tnon_mito	CAB|EIF3A|ITGB4BP|b(2)gcn|eIF-6|p27(BBP)|p27BBP|P56537	ENSG00000242372
COPS3	COP9 signalosome complex subunit 3 OS=Homo sapiens GN=COPS3 PE=1 SV=3	1	1	5		2800000	3600000	4700000	4400000	5300000	1400000	4500000	3.21429	1.6845	0.254148	0.594913	4850000	4150000	3.46429	2.96429	1.79256	1.56768	4	FALSE	FALSE	TRUE	33	411	8.0292	Tnon_mito	CSN3|SGN3|Q9UNS2	ENSG00000141030
EIF3D	Eukaryotic translation initiation factor 3 subunit D OS=Homo sapiens GN=EIF3D PE=1 SV=1	15	15	89	80000000	78000000	74000000	61000000	74000000	73000000	79000000	70500000	0.892405	-0.164229	0.0714533	1.14598	73500000	67500000	0.93038	0.85443	-0.104108	-0.226965	4	FALSE	TRUE	TRUE	81	411	19.708	Tnon_mito	EIF3S7|eIF3-p66|eIF3-zeta|O15371	ENSG00000100353
MAEA	Macrophage erythroblast attacher OS=Homo sapiens GN=MAEA PE=2 SV=1	1	1	2					7900000	6800000	0	3675000	100	6.64386	0.183468	0.736441	7350000	0	100	0	6.64386		2	FALSE	FALSE	FALSE	6	411	1.45985	Tnon_mito	EMLP|EMP|GID9|HLC-10|PIG5|Q7L5Y9	ENSG00000090316
IPO8	Importin-8 OS=Homo sapiens GN=IPO8 PE=1 SV=2	14	14	41	7200000	15000000	18000000	14000000	21000000	20000000	11100000	18250000	1.64414	0.717337	0.288764	0.539458	20500000	16000000	1.84685	1.44144	0.885064	0.527512	4	FALSE	TRUE	TRUE	55	411	13.382	Tnon_mito	RANBP8|O15397	ENSG00000133704
FAM114A2	Protein FAM114A2 OS=Homo sapiens GN=FAM114A2 PE=1 SV=4	1	1	4		5600000	8300000	6300000		7900000	2800000	5625000	2.00893	1.00643	0.492492	0.307601	3950000	7300000	1.41071	2.60714	0.496426	1.38247	3	FALSE	FALSE	FALSE	2	411	0.486618	Tnon_mito	133K02|C5orf3|Q9NRY5	ENSG00000055147
LSM4	U6 snRNA-associated Sm-like protein LSm4 (Fragment) OS=Homo sapiens GN=LSM4 PE=4 SV=1	1	1	1	12000000						6000000	0	0		0.5	0.30103	0	0	0	0			0	FALSE	FALSE	FALSE	68	411	16.545	Tnon_mito	GRP|YER112W|Q9Y4Z0	ENSG00000130520
EXOSC1	Exosome complex component CSL4 OS=Homo sapiens GN=EXOSC1 PE=1 SV=1	1	1	1		5700000					2850000	0	0		0.5	0.30103	0	0	0	0			0	FALSE	FALSE	FALSE	22	411	5.3528	Tnon_mito	CGI-108|CSL4|Csl4p|SKI4|Ski4p|hCsl4p|p13|Q9Y3B2	ENSG00000171311
FAM96B	Mitotic spindle-associated MMXD complex subunit MIP18 OS=Homo sapiens GN=FAM96B PE=1 SV=1	1	1	5		5400000	17000000	12000000	14000000	15000000	2700000	14500000	5.37037	2.42502	0.106681	0.971914	14500000	14500000	5.37037	5.37037	2.42502	2.42502	4	FALSE	FALSE	TRUE	20	411	4.86618	Tnon_mito	MIP18|Q9Y3D0	ENSG00000166595
XPO5	Exportin-5 OS=Homo sapiens GN=XPO5 PE=1 SV=1	10	10	32	8800000	2900000	13000000	13000000	15000000	14000000	5850000	13750000	2.35043	1.23292	0.219976	0.657625	14500000	13000000	2.47863	2.22222	1.30954	1.152	4	FALSE	TRUE	TRUE	45	411	10.9489	Tnon_mito	exp5|Q9HAV4	ENSG00000124571
SLAIN2	SLAIN motif-containing protein 2 OS=Homo sapiens GN=SLAIN2 PE=1 SV=2	12	12	89	83000000	84000000	95000000	91000000	99000000	89000000	83500000	93500000	1.11976	0.16319	0.0179574	1.74576	94000000	93000000	1.12575	1.11377	0.170885	0.155455	4	TRUE	TRUE	TRUE	28	411	6.81265	Tnon_mito	KIAA1458|Q9P270	ENSG00000109171
MOB2	Isoform 3 of MOB kinase activator 2 OS=Homo sapiens GN=MOB2	2	2	5	8900000	9800000	6300000	6500000			9350000	3200000	0.342246	-1.54689	0.0414406	1.38257	0	6400000	0	0.684492		-0.546894	2	TRUE	FALSE	TRUE	26	411	6.32603	Tnon_mito	HCCA2|Q70IA6	ENSG00000182208
CCDC124	Coiled-coil domain-containing protein 124 OS=Homo sapiens GN=CCDC124 PE=1 SV=1	3	3	16	13000000	13000000	16000000	15000000	23000000	21000000	13000000	18750000	1.44231	0.528379	0.0587111	1.23128	22000000	15500000	1.69231	1.19231	0.758992	0.253757	4	FALSE	TRUE	TRUE	74	411	18.0049	Tnon_mito	Q96CT7	ENSG00000007080
CANX	Calnexin OS=Homo sapiens GN=CANX PE=2 SV=1	13	13	118	75000000	77000000	140000000	160000000	150000000	160000000	76000000	152500000	2.00658	1.00474	0.000360275	3.44337	155000000	150000000	2.03947	1.97368	1.0282	0.980891	4	TRUE	TRUE	TRUE	126	411	30.6569	Tnon_mito	CNX|IP90|P90|P27824	ENSG00000127022
CLTA	Isoform Non-brain of Clathrin light chain A OS=Homo sapiens GN=CLTA	2	2	9	7200000	8400000	13000000	12000000	14000000	15000000	7800000	13500000	1.73077	0.791413	0.00603669	2.2192	14500000	12500000	1.85897	1.60256	0.894507	0.680382	4	TRUE	FALSE	TRUE	59	411	14.3552	Tnon_mito	LCA|P09496	ENSG00000122705
CLTB	Clathrin light chain B OS=Homo sapiens GN=CLTB PE=1 SV=1	1	1	1			9000000				0	2250000	100	6.64386	0.391002	0.407821	0	4500000	0	100		6.64386	1	FALSE	FALSE	FALSE	14	411	3.40633	Tnon_mito	LCB|P09497	ENSG00000175416
CTNNA1	Isoform 2 of Catenin alpha-1 OS=Homo sapiens GN=CTNNA1	2	2	3		6100000	4000000	3600000			3050000	1900000	0.622951	-0.68281	0.772696	0.111991	0	3800000	0	1.2459		0.31719	2	FALSE	FALSE	FALSE	34	411	8.27251	Tnon_mito	CAP102|P35221	ENSG00000044115
DAD1	Dolichyl-diphosphooligosaccharide--protein glycosyltransferase subunit DAD1 OS=Homo sapiens GN=DAD1 PE=1 SV=3	2	2	6			7800000	6100000	8600000	8400000	0	7725000	100	6.64386	0.000858557	3.06623	8500000	6950000	100	100	6.64386	6.64386	4	TRUE	FALSE	TRUE	8	411	1.94647	Tnon_mito	OST2|P61803	ENSG00000129562
FLNB	Isoform 8 of Filamin-B OS=Homo sapiens GN=FLNB	5	8	26	3800000	3400000	3600000	4300000	4400000	4100000	3600000	4100000	1.13889	0.187627	0.170433	0.768447	4250000	3950000	1.18056	1.09722	0.239466	0.133856	4	FALSE	TRUE	TRUE	171	411	41.6058	Tnon_mito	ABP-278|ABP-280|AOI|FH1|FLN-B|FLN1L|LRS1|SCT|TABP|TAP|O75369	ENSG00000136068
FLNC	Filamin-C OS=Homo sapiens GN=FLNC PE=1 SV=3	3	8	36		2400000	3000000			4500000	1200000	1875000	1.5625	0.643856	0.710828	0.148235	2250000	1500000	1.875	1.25	0.906891	0.321928	2	FALSE	TRUE	TRUE	147	411	35.7664	Tnon_mito	ABP-280|ABP280A|ABPA|ABPL|FLN2|MFM5|MPD4|Q14315	ENSG00000128591
GDI2	Rab GDP dissociation inhibitor beta OS=Homo sapiens GN=GDI2 PE=2 SV=1	1	1	1				4800000			0	1200000	100	6.64386	0.391002	0.407821	0	2400000	0	100		6.64386	1	FALSE	FALSE	FALSE	80	411	19.4647	Tnon_mito	HEL-S-46e|RABGDIB|P50395	ENSG00000057608
KPNB1	Importin subunit beta-1 OS=Homo sapiens GN=KPNB1 PE=1 SV=2	24	24	167	48000000	56000000	57000000	55000000	59000000	50000000	52000000	55250000	1.0625	0.0874628	0.561832	0.250394	54500000	56000000	1.04808	1.07692	0.0677446	0.106915	4	FALSE	TRUE	TRUE	161	411	39.1727	Tnon_mito	IMB1|IPO1|IPOB|Impnb|NTF97|Q14974	ENSG00000108424
MIF	Macrophage migration inhibitory factor OS=Homo sapiens GN=MIF PE=1 SV=4	1	1	6	8400000	8100000	8900000	9300000	9400000	9900000	8250000	9375000	1.13636	0.184425	0.0128533	1.89099	9650000	9100000	1.1697	1.10303	0.226135	0.141472	4	TRUE	FALSE	TRUE	49	411	11.9221	Tnon_mito	GIF|GLIF|MMIF|P14174	ENSG00000240972
PAFAH1B2	Platelet-activating factor acetylhydrolase IB subunit beta OS=Homo sapiens GN=PAFAH1B2 PE=1 SV=1	1	1	6	49000000	57000000	38000000	41000000			53000000	19750000	0.372642	-1.42414	0.0575178	1.2402	0	39500000	0	0.745283		-0.42414	2	FALSE	FALSE	TRUE	14	411	3.40633	Tnon_mito	HEL-S-303|P68402	ENSG00000168092
CTSA	Lysosomal protective protein OS=Homo sapiens GN=CTSA PE=1 SV=2	1	1	1	6000000						3000000	0	0		0.5	0.30103	0	0	0	0			0	FALSE	FALSE	FALSE	5	411	1.21655	Tpossible_mito	GLB2|GSL|NGBE|PPCA|PPGB|P10619	ENSG00000064601
PPP1CC	Isoform Gamma-2 of Serine/threonine-protein phosphatase PP1-gamma catalytic subunit OS=Homo sapiens GN=PPP1CC	2	6	17	7900000	6600000					7250000	0	0		0.0569241	1.2447	0	0	0	0			0	FALSE	FALSE	TRUE	123	411	29.927	Tpossible_mito	PP-1G|PP1C|PPP1G|P36873	ENSG00000186298
RPS6	40S ribosomal protein S6 OS=Homo sapiens GN=RPS6 PE=1 SV=1	6	6	65	230000000	180000000	150000000	150000000	180000000	170000000	205000000	162500000	0.792683	-0.335184	0.321058	0.493416	175000000	150000000	0.853659	0.731707	-0.228269	-0.450661	4	FALSE	TRUE	TRUE	208	411	50.6083	Tnon_mito	S6|P62753	ENSG00000137154
RPS24	Isoform 4 of 40S ribosomal protein S24 OS=Homo sapiens GN=RPS24	4	4	47	120000000	140000000	78000000	110000000	88000000	100000000	130000000	94000000	0.723077	-0.467779	0.0953756	1.02056	94000000	94000000	0.723077	0.723077	-0.467779	-0.467779	4	FALSE	TRUE	TRUE	179	411	43.5523	Tnon_mito	DBA3|S24|P62847	ENSG00000138326
RRBP1	Ribosome-binding protein 1 OS=Homo sapiens GN=RRBP1 PE=1 SV=4	6	6	15	7000000	5600000		3700000	5000000	6300000	6300000	3750000	0.595238	-0.748461	0.171038	0.766907	5650000	1850000	0.896825	0.293651	-0.157101	-1.76783	3	FALSE	TRUE	TRUE	58	411	14.1119	Tnon_mito	ES/130|ES130|RRp|hES|Q9P2E9	ENSG00000125844
S100A9	Protein S100-A9 OS=Homo sapiens GN=S100A9 PE=1 SV=1	1	1	5	10000000	13000000		20000000	13000000	14000000	11500000	11750000	1.02174	0.0310269	0.958335	0.0184828	13500000	10000000	1.17391	0.869565	0.231326	-0.201634	3	FALSE	FALSE	TRUE	60	411	14.5985	Tnon_mito	60B8AG|CAGB|CFAG|CGLB|L1AG|LIAG|MAC387|MIF|MRP14|NIF|P14|P06702	ENSG00000163220
SSR4	Translocon-associated protein subunit delta OS=Homo sapiens GN=SSR4 PE=1 SV=1	1	1	4			8000000	7100000	9400000	9200000	0	8425000	100	6.64386	0.000569372	3.2446	9300000	7550000	100	100	6.64386	6.64386	4	TRUE	FALSE	FALSE	80	411	19.4647	Tnon_mito	TRAPD|P51571	ENSG00000180879
TPP2	Tripeptidyl-peptidase 2 OS=Homo sapiens GN=TPP2 PE=1 SV=4	32	32	128	24000000	30000000	17000000	17000000	20000000	22000000	27000000	19000000	0.703704	-0.50696	0.189812	0.721677	21000000	17000000	0.777778	0.62963	-0.36257	-0.667425	4	FALSE	TRUE	TRUE	31	411	7.54258	Tnon_mito	TPP-2|P29144	ENSG00000134900
BANF1	Barrier-to-autointegration factor OS=Homo sapiens GN=BANF1 PE=1 SV=1	2	2	4	6000000	12000000					9000000	0	0		0.204833	0.688601	0	0	0	0			0	FALSE	FALSE	FALSE	43	411	10.4623	Tnon_mito	BAF|BCRP1|D14S1460|NGPS|O75531	ENSG00000175334
IQGAP1	Ras GTPase-activating-like protein IQGAP1 OS=Homo sapiens GN=IQGAP1 PE=1 SV=1	4	4	8			3600000	3900000	6700000	5500000	0	4925000	100	6.64386	0.00649254	2.18759	6100000	3750000	100	100	6.64386	6.64386	4	TRUE	TRUE	TRUE	95	411	23.1144	Tnon_mito	HUMORFA01|SAR1|p195|P46940	ENSG00000140575
ACTR3	Actin-related protein 3 OS=Homo sapiens GN=ACTR3 PE=1 SV=3	2	2	2	3200000	8600000					5900000	0	0		0.273224	0.563482	0	0	0	0			0	FALSE	FALSE	FALSE	41	411	9.97567	Tnon_mito	ARP3|P61158	ENSG00000115091
BCAP31	Isoform 2 of B-cell receptor-associated protein 31 OS=Homo sapiens GN=BCAP31	3	3	18	14000000	13000000	21000000	32000000	17000000	46000000	13500000	29000000	2.14815	1.10309	0.0966155	1.01495	31500000	26500000	2.33333	1.96296	1.22239	0.973033	4	FALSE	TRUE	TRUE	36	411	8.75912	Tpossible_mito	6C6-AG|BAP31|CDM|DDCH|DXS1357E|P51572	ENSG00000185825
CAP1	Adenylyl cyclase-associated protein 1 OS=Homo sapiens GN=CAP1 PE=1 SV=5	1	1	1						5000000	0	1250000	100	6.64386	0.391002	0.407821	2500000	0	100	0	6.64386		1	FALSE	FALSE	FALSE	85	411	20.6813	Tnon_mito	CAP|CAP1-PEN|Q01518	ENSG00000131236
TMED2	Transmembrane emp24 domain-containing protein 2 OS=Homo sapiens GN=TMED2 PE=1 SV=1	1	1	1					8700000		0	2175000	100	6.64386	0.391002	0.407821	4350000	0	100	0	6.64386		1	FALSE	FALSE	FALSE	13	411	3.16302	Tnon_mito	P24A|RNP24|p24|Q15363	ENSG00000086598
TMED10	Transmembrane emp24 domain-containing protein 10 OS=Homo sapiens GN=TMED10 PE=1 SV=2	3	3	6			26000000	14000000	6600000	7400000	0	13500000	100	6.64386	0.0571924	1.24266	7000000	20000000	100	100	6.64386	6.64386	4	FALSE	TRUE	TRUE	19	411	4.62287	Tnon_mito	P24(DELTA)|S31I125|S31III125|TMP21|Tmp-21-I|p23|P49755	ENSG00000170348
DCTN3	Dynactin subunit 3 OS=Homo sapiens GN=DCTN3 PE=1 SV=1	4	4	12	8700000	7900000	9700000	11000000	13000000	12000000	8300000	11425000	1.37651	0.461011	0.01824	1.73898	12500000	10350000	1.50602	1.24699	0.590745	0.318448	4	TRUE	TRUE	TRUE	9	411	2.18978	Tnon_mito	DCTN-22|DCTN22|O75935	ENSG00000137100
MAPRE1	Microtubule-associated protein RP/EB family member 1 OS=Homo sapiens GN=MAPRE1 PE=1 SV=3	1	1	1				3100000			0	775000	100	6.64386	0.391002	0.407821	0	1550000	0	100		6.64386	1	FALSE	FALSE	FALSE	36	411	8.75912	Tnon_mito	EB1|Q15691	ENSG00000101367
EPB41L3	Band 4.1-like protein 3 OS=Homo sapiens GN=EPB41L3 PE=1 SV=2	1	1	6	5600000	4300000	4000000	4000000	4500000	950000	4950000	3362500	0.679293	-0.557894	0.209108	0.679629	2725000	4000000	0.550505	0.808081	-0.861172	-0.307429	4	FALSE	FALSE	TRUE	55	411	13.382	Tnon_mito	4.1B|DAL-1|DAL1|Q9Y2J2	ENSG00000082397
SEC61A1	Protein transport protein Sec61 subunit alpha isoform 1 OS=Homo sapiens GN=SEC61A1 PE=2 SV=1	4	4	18	12000000	8100000	16000000	16000000	18000000	20000000	10050000	17500000	1.74129	0.800159	0.110268	0.957552	19000000	16000000	1.89055	1.59204	0.918804	0.670876	4	FALSE	TRUE	TRUE	28	411	6.81265	Tnon_mito	HSEC61|SEC61|SEC61A|P61619	ENSG00000058262
PTPLAD1	Very-long-chain (3R)-3-hydroxyacyl-[acyl-carrier protein] dehydratase 3 OS=Homo sapiens GN=PTPLAD1 PE=1 SV=2	3	3	8			9600000	9700000	11000000	12000000	0	10575000	100	6.64386	0.000345522	3.46152	11500000	9650000	100	100	6.64386	6.64386	4	TRUE	TRUE	TRUE	55	411	13.382	Tnon_mito	B-IND1|HACD3|HSPC121|Q9P035	ENSG00000074696
BCLAF1	Bcl-2-associated transcription factor 1 OS=Homo sapiens GN=BCLAF1 PE=2 SV=1	19	19	128	250000000	230000000	120000000	110000000	100000000	130000000	240000000	115000000	0.479167	-1.0614	0.0106862	1.97118	115000000	115000000	0.479167	0.479167	-1.0614	-1.0614	4	TRUE	TRUE	TRUE	171	411	41.6058	Tnon_mito	BTF|bK211L9.1|Q9NYF8	ENSG00000029363
ADRM1	Proteasomal ubiquitin receptor ADRM1 OS=Homo sapiens GN=ADRM1 PE=1 SV=2	4	4	31	18000000	13000000	28000000	29000000	31000000	30000000	15500000	29500000	1.90323	0.928447	0.0949347	1.02258	30500000	28500000	1.96774	1.83871	0.976541	0.878694	4	FALSE	TRUE	TRUE	67	411	16.3017	Tnon_mito	ARM-1|ARM1|GP110|Q16186	ENSG00000130706
OBSL1	Obscurin-like protein 1 OS=Homo sapiens GN=OBSL1 PE=1 SV=4	10	10	32	7700000	7500000	14000000	12000000	13000000	13000000	7600000	13000000	1.71053	0.77444	0.000590219	3.22899	13000000	13000000	1.71053	1.71053	0.77444	0.77444	4	TRUE	TRUE	TRUE	5	411	1.21655	Tnon_mito	O75147	ENSG00000124006
CLNS1A	Methylosome subunit pICln OS=Homo sapiens GN=CLNS1A PE=1 SV=1	10	10	236	320000000	320000000	260000000	270000000	290000000	310000000	320000000	282500000	0.882812	-0.179821	0.0430149	1.36638	300000000	265000000	0.9375	0.828125	-0.0931094	-0.27208	4	TRUE	TRUE	TRUE	141	411	34.3066	Tnon_mito	CLCI|CLNS1B|ICln|P54105	ENSG00000074201
EIF5	Eukaryotic translation initiation factor 5 OS=Homo sapiens GN=EIF5 PE=1 SV=2	2	2	10	4800000	7000000	5600000	7800000	8900000	9700000	5900000	8000000	1.35593	0.439285	0.255967	0.591816	9300000	6700000	1.57627	1.13559	0.656516	0.183446	4	FALSE	FALSE	TRUE	40	411	9.73236	Tnon_mito	EIF-5|EIF-5A|P55010	ENSG00000100664
ERH	Enhancer of rudimentary homolog OS=Homo sapiens GN=ERH PE=1 SV=1	4	4	151	4900000000	5600000000	2700000000	2300000000	2100000000	2200000000	5250000000	2325000000	0.442857	-1.17509	0.0478909	1.31975	2150000000	2500000000	0.409524	0.47619	-1.28798	-1.07039	4	TRUE	TRUE	TRUE	150	411	36.4964	Tnon_mito	DROER|P84090	ENSG00000100632
M6PR	Cation-dependent mannose-6-phosphate receptor OS=Homo sapiens GN=M6PR PE=1 SV=1	1	1	2				5600000		5200000	0	2700000	100	6.64386	0.182126	0.739627	2600000	2800000	100	100	6.64386	6.64386	2	FALSE	FALSE	FALSE	3	411	0.729927	Tnon_mito	CD-MPR|MPR 46|MPR-46|MPR46|SMPR|P20645	ENSG00000003056
PPP2R2A	Isoform 2 of Serine/threonine-protein phosphatase 2A 55 kDa regulatory subunit B alpha isoform OS=Homo sapiens GN=PPP2R2A	1	1	1				4300000			0	1075000	100	6.64386	0.391002	0.407821	0	2150000	0	100		6.64386	1	FALSE	FALSE	FALSE	93	411	22.6277	Tnon_mito	B55A|B55ALPHA|PR52A|PR55A|P63151	ENSG00000221914
RANGAP1	Ran GTPase-activating protein 1 OS=Homo sapiens GN=RANGAP1 PE=1 SV=1	8	8	32	14000000	12000000	18000000	15000000	20000000	19000000	13000000	18000000	1.38462	0.469485	0.0380558	1.41958	19500000	16500000	1.5	1.26923	0.584963	0.343954	4	TRUE	TRUE	TRUE	92	411	22.3844	Tnon_mito	Fug1|RANGAP|SD|P46060	ENSG00000100401
SRP9	Signal recognition particle 9 kDa protein OS=Homo sapiens GN=SRP9 PE=1 SV=2	3	3	21	15000000	18000000	24000000	25000000	33000000	35000000	16500000	29250000	1.77273	0.825971	0.0157546	1.80259	34000000	24500000	2.06061	1.48485	1.04307	0.570316	4	TRUE	TRUE	TRUE	39	411	9.48905	Tnon_mito	ALURBP|P49458	ENSG00000143742
TPD52L1	Tumor protein D53 OS=Homo sapiens GN=TPD52L1 PE=2 SV=1	1	1	2					6000000	6100000	0	3025000	100	6.64386	0.181712	0.740617	6050000	0	100	0	6.64386		2	FALSE	FALSE	FALSE	4	411	0.973236	Tnon_mito	D53|hD53|Q16890	ENSG00000111907
ZNF207	Isoform 4 of BUB3-interacting and GLEBS motif-containing protein ZNF207 OS=Homo sapiens GN=ZNF207	2	2	3		14000000				11000000	7000000	2750000	0.392857	-1.34792	0.652811	0.185213	5500000	0	0.785714	0	-0.347923		1	FALSE	FALSE	FALSE	24	411	5.83942	Tnon_mito	O43670	ENSG00000010244
COIL	Coilin OS=Homo sapiens GN=COIL PE=1 SV=1	1	1	1	6300000						3150000	0	0		0.5	0.30103	0	0	0	0			0	FALSE	FALSE	FALSE	53	411	12.8954	Tnon_mito	CLN80|p80-coilin|P38432	ENSG00000121058
SF3A2	Splicing factor 3A subunit 2 OS=Homo sapiens GN=SF3A2 PE=1 SV=2	1	1	6	7100000	3400000	4100000		6600000	2400000	5250000	3275000	0.62381	-0.680823	0.47579	0.322584	4500000	2050000	0.857143	0.390476	-0.222392	-1.35669	3	FALSE	FALSE	TRUE	83	411	20.1946	Tnon_mito	PRP11|PRPF11|SAP62|SF3a66|Q15428	ENSG00000104897
EIF2S2	Eukaryotic translation initiation factor 2 subunit 2 OS=Homo sapiens GN=EIF2S2 PE=1 SV=2	19	19	131	54000000	60000000	49000000	41000000	58000000	56000000	57000000	51000000	0.894737	-0.160465	0.291804	0.534909	57000000	45000000	1	0.789474	0	-0.341037	4	FALSE	TRUE	TRUE	71	411	17.2749	Tnon_mito	EIF2|EIF2B|EIF2beta|PPP1R67|eIF-2-beta|P20042	ENSG00000125977
WTAP	Pre-mRNA-splicing regulator WTAP OS=Homo sapiens GN=WTAP PE=1 SV=2	4	4	9	12000000	9300000		6300000	9300000	7700000	10650000	5825000	0.546948	-0.870523	0.120632	0.918536	8500000	3150000	0.798122	0.295775	-0.325319	-1.75743	3	FALSE	TRUE	TRUE	41	411	9.97567	Tnon_mito	Q15007	ENSG00000146457
DCTN2	Dynactin subunit 2 OS=Homo sapiens GN=DCTN2 PE=2 SV=1	12	12	85	27000000	54000000	30000000	32000000	35000000	35000000	40500000	33000000	0.814815	-0.295456	0.677069	0.169367	35000000	31000000	0.864198	0.765432	-0.210567	-0.385654	4	FALSE	TRUE	TRUE	91	411	22.1411	Tnon_mito	DCTN50|DYNAMITIN|HEL-S-77|RBP50|Q13561	ENSG00000175203
TGOLN2	Trans-Golgi network integral membrane protein 2 OS=Homo sapiens GN=TGOLN2 PE=1 SV=2	1	1	3		1900000	2400000	2400000			950000	1200000	1.26316	0.337035	0.85014	0.0705098	0	2400000	0	2.52632		1.33703	2	FALSE	FALSE	FALSE	0	411	0	Tnon_mito	TGN38|TGN46|TGN48|TGN51|TTGN2|O43493	ENSG00000152291
COPE	Coatomer protein complex, subunit epsilon, isoform CRA_g OS=Homo sapiens GN=COPE PE=4 SV=1	5	5	19	11000000	18000000	30000000	21000000	20000000	18000000	14500000	22250000	1.53448	0.617752	0.206338	0.68542	19000000	25500000	1.31034	1.75862	0.389947	0.814444	4	FALSE	TRUE	TRUE	34	411	8.27251	Tnon_mito	epsilon-COP|O14579	ENSG00000105669
CASC3	Protein CASC3 OS=Homo sapiens GN=CASC3 PE=1 SV=2	1	1	4	4200000		5200000		4900000	5800000	2100000	3975000	1.89286	0.920566	0.534568	0.271997	5350000	2600000	2.54762	1.2381	1.34915	0.308122	3	FALSE	FALSE	FALSE	4	411	0.973236	Tnon_mito	BTZ|MLN51|O15234	ENSG00000108349
CEP152	Centrosomal protein of 152 kDa OS=Homo sapiens GN=CEP152 PE=1 SV=4	1	1	1		10000000					5000000	0	0		0.5	0.30103	0	0	0	0			0	FALSE	FALSE	FALSE	6	411	1.45985	Tnon_mito	MCPH4|MCPH9|SCKL5|O94986	ENSG00000103995
FAM120A	Isoform F of Constitutive coactivator of PPAR-gamma-like protein 1 OS=Homo sapiens GN=FAM120A	2	2	7	1900000	1800000	2600000	2300000	3100000	3000000	1850000	2750000	1.48649	0.571906	0.0136921	1.86353	3050000	2450000	1.64865	1.32432	0.721284	0.405256	4	TRUE	FALSE	TRUE	35	411	8.51582	Tnon_mito	C9orf10|DNAPTP1|DNAPTP5|OSSA|Q9NZB2	ENSG00000048828
FAM98A	Protein FAM98A OS=Homo sapiens GN=FAM98A PE=1 SV=1	7	9	51	13000000	19000000	14000000	12000000	17000000	17000000	16000000	15000000	0.9375	-0.0931094	0.798492	0.0977296	17000000	13000000	1.0625	0.8125	0.0874628	-0.29956	4	FALSE	TRUE	TRUE	43	411	10.4623	Tnon_mito	Q8NCA5	ENSG00000119812
GEMIN4	Gem-associated protein 4 OS=Homo sapiens GN=GEMIN4 PE=1 SV=2	4	4	6	4700000	6100000				5200000	5400000	1300000	0.240741	-2.05445	0.0501685	1.29957	2600000	0	0.481481	0	-1.05445		1	FALSE	TRUE	TRUE	44	411	10.7056	Tnon_mito	HC56|HCAP1|HHRF-1|p97|P57678	ENSG00000179409
EXOSC3	Exosome complex component RRP40 OS=Homo sapiens GN=EXOSC3 PE=1 SV=3	1	1	6	7300000	7700000	8900000	9300000	8900000	7900000	7500000	8750000	1.16667	0.222392	0.0261784	1.58206	8400000	9100000	1.12	1.21333	0.163499	0.278976	4	TRUE	FALSE	TRUE	34	411	8.27251	Tnon_mito	PCH1B|RP11-3J10.8|RRP40|Rrp40p|bA3J10.7|hRrp-40|p10|Q9NQT5	ENSG00000107371
DCTN4	Isoform 3 of Dynactin subunit 4 OS=Homo sapiens GN=DCTN4	4	4	9	6400000	5300000	8100000	6100000	6500000	4500000	5850000	6300000	1.07692	0.106915	0.652327	0.185535	5500000	7100000	0.940171	1.21368	-0.089005	0.279382	4	FALSE	TRUE	TRUE	22	411	5.3528	Tnon_mito	DYN4|P62|Q9UJW0	ENSG00000132912
KIAA1551	Uncharacterized protein KIAA1551 OS=Homo sapiens GN=KIAA1551 PE=1 SV=3	1	1	11	14000000000	90000000000	15000000000	21000000000	14000000000	5500000000	52000000000	13875000000	0.266827	-1.90602	0.49822	0.302579	9750000000	18000000000	0.1875	0.346154	-2.41504	-1.53051	4	FALSE	FALSE	TRUE	0	411	0	Tnon_mito	C12orf35|Q9HCM1	ENSG00000174718
C17orf85	Uncharacterized protein C17orf85 OS=Homo sapiens GN=C17orf85 PE=1 SV=2	1	1	1			3000000				0	750000	100	6.64386	0.391002	0.407821	0	1500000	0	100		6.64386	1	FALSE	FALSE	FALSE	22	411	5.3528	Tnon_mito	ELG|HSA277841|Q53F19	ENSG00000074356
DDA1	DET1- and DDB1-associated protein 1 OS=Homo sapiens GN=DDA1 PE=1 SV=1	1	1	6	23000000	19000000	24000000	20000000	26000000	24000000	21000000	23500000	1.11905	0.162271	0.408437	0.388875	25000000	22000000	1.19048	1.04762	0.251539	0.0671142	4	FALSE	FALSE	TRUE	2	411	0.486618	Tnon_mito	C19orf58|PCIA1|Q9BW61	ENSG00000130311
C2orf49	Ashwin OS=Homo sapiens GN=C2orf49 PE=1 SV=1	2	2	8	13000000	12000000	11000000	11000000	12000000	16000000	12500000	12500000	1	0	1	0	14000000	11000000	1.12	0.88	0.163499	-0.184425	4	FALSE	FALSE	TRUE	2	411	0.486618	Tnon_mito	asw|Q9BVC5	ENSG00000135974
C11orf48	Uncharacterized protein C11orf48 OS=Homo sapiens GN=C11orf48 PE=2 SV=1	1	1	1					8900000		0	2225000	100	6.64386	0.391002	0.407821	4450000	0	100	0	6.64386		1	FALSE	FALSE	FALSE				Tpossible_mito	Q9BQE6	ENSG00000162194
PROSER1	Proline and serine-rich protein 1 OS=Homo sapiens GN=PROSER1 PE=1 SV=2	5	5	10			7600000	11000000	15000000	6900000	0	10125000	100	6.64386	0.0120893	1.9176	10950000	9300000	100	100	6.64386	6.64386	4	TRUE	TRUE	TRUE	5	411	1.21655	Tnon_mito	C13orf23|Q86XN7	ENSG00000120685
CLPTM1L	Cleft lip and palate transmembrane protein 1-like protein OS=Homo sapiens GN=CLPTM1L PE=1 SV=1	2	2	5			6500000	7300000	5900000	6100000	0	6450000	100	6.64386	0.000241811	3.61652	6000000	6900000	100	100	6.64386	6.64386	4	TRUE	FALSE	TRUE	10	411	2.43309	Tnon_mito	CRR9|Q96KA5	ENSG00000049656
SF3B5	Splicing factor 3B subunit 5 OS=Homo sapiens GN=SF3B5 PE=1 SV=1	3	3	9	21000000	23000000	22000000	14000000		24000000	22000000	15000000	0.681818	-0.552541	0.290565	0.536757	12000000	18000000	0.545455	0.818182	-0.874469	-0.289507	3	FALSE	TRUE	TRUE	55	411	13.382	Tnon_mito	SF3b10|Ysf3|Q9BWJ5	ENSG00000169976
BCL2L12	Bcl-2-like protein 12 OS=Homo sapiens GN=BCL2L12 PE=1 SV=1	1	1	1				4100000			0	1025000	100	6.64386	0.391002	0.407821	0	2050000	0	100		6.64386	1	FALSE	FALSE	FALSE	0	411	0	Tnon_mito	Q9HB09	ENSG00000126453
C19orf47	Uncharacterized protein C19orf47 OS=Homo sapiens GN=C19orf47 PE=1 SV=1	3	3	9	10000000	6000000	6800000	12000000	10000000	12000000	8000000	10200000	1.275	0.350497	0.456246	0.340801	11000000	9400000	1.375	1.175	0.459432	0.232661	4	FALSE	TRUE	TRUE				Tnon_mito	Q8N9M1	ENSG00000160392
SCLT1	Sodium channel and clathrin linker 1 OS=Homo sapiens GN=SCLT1 PE=1 SV=2	1	1	1		8700000					4350000	0	0		0.5	0.30103	0	0	0	0			0	FALSE	FALSE	FALSE	0	411	0	Tnon_mito	CAP-1A|CAP1A|hCAP-1A|Q96NL6	ENSG00000151466
C11orf84	Uncharacterized protein C11orf84 OS=Homo sapiens GN=C11orf84 PE=1 SV=3	13	13	70	24000000	34000000	26000000	17000000	30000000	18000000	29000000	22750000	0.784483	-0.350186	0.408437	0.388875	24000000	21500000	0.827586	0.741379	-0.273018	-0.431716	4	FALSE	TRUE	TRUE	92	411	22.3844	Tnon_mito	Q9BUA3	ENSG00000168005
CCDC12	Coiled-coil domain containing 12, isoform CRA_a OS=Homo sapiens GN=CCDC12 PE=4 SV=1	1	1	1					8400000		0	2100000	100	6.64386	0.391002	0.407821	4200000	0	100	0	6.64386		1	FALSE	FALSE	FALSE	14	411	3.40633	Tnon_mito	Q8WUD4	ENSG00000160799
FAM134C	Protein FAM134C OS=Homo sapiens GN=FAM134C PE=1 SV=1	1	1	6		2900000		7300000	6500000	6700000	1450000	5125000	3.53448	1.8215	0.187702	0.726531	6600000	3650000	4.55172	2.51724	2.18641	1.33184	3	FALSE	FALSE	TRUE	0	411	0	Tnon_mito	Q86VR2	ENSG00000141699
FAM151B	Protein FAM151B OS=Homo sapiens GN=FAM151B PE=2 SV=2	1	1	1		9500000					4750000	0	0		0.5	0.30103	0	0	0	0			0	FALSE	FALSE	FALSE	0	411	0	Tnon_mito	UNQ9217|Q6UXP7	ENSG00000152380
KPRP	Keratinocyte proline-rich protein OS=Homo sapiens GN=KPRP PE=1 SV=1	1	1	1						9900000	0	2475000	100	6.64386	0.391002	0.407821	4950000	0	100	0	6.64386		1	FALSE	FALSE	FALSE	60	411	14.5985	Tnon_mito	C1orf45|Q5T749	ENSG00000203786
PSMD14	26S proteasome non-ATPase regulatory subunit 14 OS=Homo sapiens GN=PSMD14 PE=1 SV=1	6	6	34	24000000	42000000	28000000	23000000	28000000	28000000	33000000	26750000	0.810606	-0.302927	0.612908	0.212605	28000000	25500000	0.848485	0.772727	-0.237039	-0.371969	4	FALSE	TRUE	TRUE	83	411	20.1946	Tnon_mito	PAD1|POH1|RPN11|O00487	ENSG00000115233
KRT6A	SWISS-PROT:P02538 Tax_Id=9606 Gene_Symbol=KRT6A Keratin, type II cytoskeletal 6A	3	25	170	21000000	17000000	8000000	7200000	11000000	8300000	19000000	8625000	0.453947	-1.1394	0.0822707	1.08475	9650000	7600000	0.507895	0.4	-0.977399	-1.32193	4	FALSE	TRUE	TRUE	283	411	68.8564	Tnon_mito	CK6A|CK6C|CK6D|K6A|K6C|K6D|KRT6C|KRT6D|P02538	ENSG00000205420
ARCN1	Coatomer subunit delta OS=Homo sapiens GN=ARCN1 PE=1 SV=1	14	14	63	14000000	16000000	27000000	29000000	26000000	28000000	15000000	27500000	1.83333	0.874469	0.0106862	1.97118	27000000	28000000	1.8	1.86667	0.847997	0.900464	4	TRUE	TRUE	TRUE	92	411	22.3844	Tnon_mito	COPD|P48444	ENSG00000095139
CALD1	Caldesmon OS=Homo sapiens GN=CALD1 PE=1 SV=3	1	1	2	7400000	6300000					6850000	0	0		0.051006	1.29238	0	0	0	0			0	FALSE	FALSE	FALSE	55	411	13.382	Tnon_mito	CDM|H-CAD|HCAD|L-CAD|LCAD|NAG22|Q05682	ENSG00000122786
HCFC1	HCF N-terminal chain 5 OS=Homo sapiens GN=HCFC1 PE=2 SV=2	4	4	19	12000000	9100000	10000000	9400000	9900000	10000000	10550000	9825000	0.93128	-0.102714	0.704791	0.15194	9950000	9700000	0.943128	0.919431	-0.0844746	-0.121186	4	FALSE	TRUE	TRUE	72	411	17.5182	Tpossible_mito	CFF|HCF-1|HCF1|HFC1|MRX3|VCAF|P51610	ENSG00000172534
KRT9	SWISS-PROT:P35527 Tax_Id=9606 Gene_Symbol=KRT9 Keratin, type I cytoskeletal 9	26	27	434	740000000	640000000	260000000	280000000	440000000	440000000	690000000	355000000	0.514493	-0.958777	0.0180871	1.74263	440000000	270000000	0.637681	0.391304	-0.649093	-1.35364	4	TRUE	TRUE	TRUE	337	411	81.9951	Tnon_mito	CK-9|EPPK|K9|P35527	ENSG00000171403
UFD1L	Isoform Long of Ubiquitin fusion degradation protein 1 homolog OS=Homo sapiens GN=UFD1L	1	1	2	7300000				5100000		3650000	1275000	0.349315	-1.5174	0.631652	0.199522	2550000	0	0.69863	0	-0.517399		1	FALSE	FALSE	FALSE	26	411	6.32603	Tnon_mito	UFD1|Q92890	ENSG00000070010
ZYX	Zyxin OS=Homo sapiens GN=ZYX PE=1 SV=1	10	10	88	81000000	72000000	90000000	76000000	110000000	98000000	76500000	93500000	1.22222	0.289507	0.114572	0.94092	104000000	83000000	1.35948	1.08497	0.443052	0.117652	4	FALSE	TRUE	TRUE	67	411	16.3017	Tnon_mito	ESP-2|HED-2|Q15942	ENSG00000159840
NUDT21	Cleavage and polyadenylation specificity factor subunit 5 OS=Homo sapiens GN=NUDT21 PE=1 SV=1	9	9	63	74000000	56000000	53000000	50000000	66000000	57000000	65000000	56500000	0.869231	-0.202189	0.510072	0.292369	61500000	51500000	0.946154	0.792308	-0.0798533	-0.335867	4	FALSE	TRUE	TRUE	119	411	28.9538	Tnon_mito	CFIM25|CPSF5|O43809	ENSG00000167005
SF3B3	Splicing factor 3B subunit 3 OS=Homo sapiens GN=SF3B3 PE=1 SV=4	27	27	141	47000000	47000000	34000000	34000000	36000000	36000000	47000000	35000000	0.744681	-0.425306	0.000243578	3.61336	36000000	34000000	0.765957	0.723404	-0.384664	-0.467126	4	TRUE	TRUE	TRUE	173	411	42.0925	Tnon_mito	RSE1|SAP130|SF3b130|STAF130|Q15393	ENSG00000189091
QPCTL	Glutaminyl-peptide cyclotransferase-like protein OS=Homo sapiens GN=QPCTL PE=1 SV=2	7	7	12	14000000	12000000	5800000	13000000	18000000	20000000	13000000	14200000	1.09231	0.127379	0.738199	0.131827	19000000	9400000	1.46154	0.723077	0.547488	-0.467779	4	FALSE	TRUE	TRUE	16	411	3.89294	Tnon_mito	gQC|Q9NXS2	ENSG00000011478
ZDBF2	DBF4-type zinc finger-containing protein 2 OS=Homo sapiens GN=ZDBF2 PE=1 SV=3	1	1	1				4100000			0	1025000	100	6.64386	0.391002	0.407821	0	2050000	0	100		6.64386	1	FALSE	FALSE	FALSE	23	411	5.59611	Tnon_mito	Q9HCK1	ENSG00000204186
ZBTB10	Zinc finger and BTB domain-containing protein 10 OS=Homo sapiens GN=ZBTB10 PE=1 SV=2	1	1	1	44000000						22000000	0	0		0.5	0.30103	0	0	0	0			0	FALSE	FALSE	FALSE	4	411	0.973236	Tnon_mito	RINZF|Q96DT7	ENSG00000205189
NOC4L	Nucleolar complex protein 4 homolog OS=Homo sapiens GN=NOC4L PE=1 SV=1	4	4	9		2400000	7100000	6000000	8200000	6200000	1200000	6875000	5.72917	2.51833	0.0918869	1.03675	7200000	6550000	6	5.45833	2.58496	2.44846	4	FALSE	TRUE	TRUE	23	411	5.59611	Tnon_mito	NET49|NOC4|UTP19|Q9BVI4	ENSG00000184967
IRF2BP2	Interferon regulatory factor 2-binding protein 2 OS=Homo sapiens GN=IRF2BP2 PE=1 SV=2	1	1	1					1700000		0	425000	100	6.64386	0.391002	0.407821	850000	0	100	0	6.64386		1	FALSE	FALSE	FALSE	10	411	2.43309	Tnon_mito	Q7Z5L9	ENSG00000168264
CACNA1A	Isoform 8 of Voltage-dependent P/Q-type calcium channel subunit alpha-1A OS=Homo sapiens GN=CACNA1A	1	1	3	62000000			61000000		46000000	31000000	26750000	0.862903	-0.212729	0.916667	0.0377884	23000000	30500000	0.741935	0.983871	-0.430634	-0.023459	2	FALSE	FALSE	FALSE	0	411	0	Tnon_mito	APCA|BI|CACNL1A4|CAV2.1|EA2|FHM|HPCA|MHP|MHP1|SCA6|O00555	ENSG00000141837
CAPZA1	F-actin-capping protein subunit alpha-1 OS=Homo sapiens GN=CAPZA1 PE=1 SV=3	7	9	54	51000000	53000000	33000000	31000000	34000000	35000000	52000000	33250000	0.639423	-0.645157	0.00171893	2.76474	34500000	32000000	0.663462	0.615385	-0.591915	-0.70044	4	TRUE	TRUE	TRUE	133	411	32.3601	Tnon_mito	CAPPA1|CAPZ|CAZ1|P52907	ENSG00000116489
CSE1L	Exportin-2 OS=Homo sapiens GN=CSE1L PE=1 SV=3	30	30	160	23000000	28000000	45000000	45000000	48000000	49000000	25500000	46750000	1.83333	0.874469	0.0428542	1.36801	48500000	45000000	1.90196	1.76471	0.927488	0.819428	4	TRUE	TRUE	TRUE	126	411	30.6569	Tnon_mito	CAS|CSE1|XPO2|P55060	ENSG00000124207
DDB1	DNA damage-binding protein 1 OS=Homo sapiens GN=DDB1 PE=1 SV=1	36	36	254	100000000	99000000	99000000	93000000	110000000	91000000	99500000	98250000	0.987437	-0.0182391	0.789697	0.10254	100500000	96000000	1.01005	0.964824	0.0144271	-0.0516621	4	FALSE	TRUE	TRUE	103	411	25.0608	Tnon_mito	DDBA|UV-DDB1|XAP1|XPCE|XPE|XPE-BF|Q16531	ENSG00000167986
EIF4G2	Eukaryotic translation initiation factor 4 gamma 2 OS=Homo sapiens GN=EIF4G2 PE=1 SV=1	15	15	67	20000000	30000000	24000000	18000000	23000000	27000000	25000000	23000000	0.92	-0.120294	0.760153	0.119099	25000000	21000000	1	0.84	0	-0.251539	4	FALSE	TRUE	TRUE	39	411	9.48905	Tnon_mito	AAG1|DAP5|NAT1|P97|P78344	ENSG00000110321
FAU	40S ribosomal protein S30 OS=Homo sapiens GN=FAU PE=4 SV=1	2	2	24	220000000	250000000	270000000	300000000	290000000	310000000	235000000	292500000	1.24468	0.315776	0.0991924	1.00352	300000000	285000000	1.2766	1.21277	0.352302	0.278301	4	FALSE	FALSE	TRUE	143	411	34.7932	Tnon_mito	FAU1|Fub1|Fubi|MNSFbeta|RPS30|S30|asr1|P35544	ENSG00000149806
GALNT2	Polypeptide N-acetylgalactosaminyltransferase 2 OS=Homo sapiens GN=GALNT2 PE=1 SV=1	1	1	1					2600000		0	650000	100	6.64386	0.391002	0.407821	1300000	0	100	0	6.64386		1	FALSE	FALSE	FALSE	11	411	2.6764	Tnon_mito	GalNAc-T2|Q10471	ENSG00000143641
RAPGEF1	Rap guanine nucleotide exchange factor 1 (Fragment) OS=Homo sapiens GN=RAPGEF1 PE=4 SV=1	1	1	1			12000000				0	3000000	100	6.64386	0.391002	0.407821	0	6000000	0	100		6.64386	1	FALSE	FALSE	FALSE	0	411	0	Tnon_mito	C3G|GRF2|Q13905	ENSG00000107263
TNPO1	Transportin-1 OS=Homo sapiens GN=TNPO1 PE=1 SV=2	7	7	24	4800000	5200000	12000000	11000000	13000000	13000000	5000000	12250000	2.45	1.29278	0.000211578	3.67453	13000000	11500000	2.6	2.3	1.37851	1.20163	4	TRUE	TRUE	TRUE	63	411	15.3285	Tnon_mito	IPO2|KPNB2|MIP|MIP1|TRN|Q92973	ENSG00000083312
KRT10	SWISS-PROT:P13645 Tax_Id=9606 Gene_Symbol=KRT10 Keratin, type I cytoskeletal 10	20	28	505	1500000000	1600000000	830000000	600000000	940000000	920000000	1550000000	822500000	0.530645	-0.914181	0.00147245	2.83196	930000000	715000000	0.6	0.46129	-0.736966	-1.11625	4	TRUE	TRUE	TRUE	355	411	86.3747	Tnon_mito	BCIE|BIE|CK10|EHK|K10|KPP|P13645	ENSG00000186395
KRT10	SWISS-PROT:P02535-1 Tax_Id=10090 Gene_Symbol=Krt10 Isoform 1 of Keratin, type I cytoskeletal 10	1	7	117	13000000	39000000					26000000	0	0		0.295167	0.529932	0	0	0	0			0	FALSE	FALSE	TRUE	355	411	86.3747	Tnon_mito	BCIE|BIE|CK10|EHK|K10|KPP|P13645	ENSG00000186395
KRT16	SWISS-PROT:P08779 Tax_Id=9606 Gene_Symbol=KRT16 Keratin, type I cytoskeletal 16	8	18	125	28000000	30000000	9700000	7300000	11000000	13000000	29000000	10250000	0.353448	-1.50043	0.000561146	3.25092	12000000	8500000	0.413793	0.293103	-1.27302	-1.77052	4	TRUE	TRUE	TRUE	274	411	66.6667	Tnon_mito	CK16|FNEPPK|K16|K1CP|KRT16A|NEPPK|P08779	ENSG00000186832
PNN	Pinin OS=Homo sapiens GN=PNN PE=1 SV=4	2	2	2	4900000						2450000	0	0		0.5	0.30103	0	0	0	0			0	FALSE	FALSE	FALSE	56	411	13.6253	Tnon_mito	DRS|DRSP|SDK3|memA|Q9H307	ENSG00000100941
POLR2H	DNA-directed RNA polymerases I, II, and III subunit RPABC3 OS=Homo sapiens GN=POLR2H PE=2 SV=1	2	2	12	4100000	5100000	4500000	4800000	4300000	4300000	4600000	4475000	0.972826	-0.0397462	0.84484	0.0732256	4300000	4650000	0.934783	1.01087	-0.0972972	0.0155969	4	FALSE	FALSE	TRUE	53	411	12.8954	Tnon_mito	RPABC3|RPB17|RPB8|P52434	ENSG00000163882
SNRPD2	Small nuclear ribonucleoprotein Sm D2 OS=Homo sapiens GN=SNRPD2 PE=1 SV=1	7	7	78	240000000	220000000	170000000	140000000	180000000	190000000	230000000	170000000	0.73913	-0.436099	0.0231411	1.63562	185000000	155000000	0.804348	0.673913	-0.314109	-0.569366	4	TRUE	TRUE	TRUE	173	411	42.0925	Tnon_mito	SMD2|SNRPD1|Sm-D2|P62316	ENSG00000125743
SNRPD3	Small nuclear ribonucleoprotein Sm D3 OS=Homo sapiens GN=SNRPD3 PE=1 SV=1	5	5	114	1000000000	1100000000	670000000	650000000	840000000	720000000	1050000000	720000000	0.685714	-0.544321	0.0224887	1.64804	780000000	660000000	0.742857	0.628571	-0.428843	-0.669851	4	TRUE	TRUE	TRUE	176	411	42.8224	Tnon_mito	SMD3|Sm-D3|P62318	ENSG00000100028
SVIL	Supervillin OS=Homo sapiens GN=SVIL PE=1 SV=2	3	3	3	3400000	4900000					4150000	0	0		0.113823	0.943769	0	0	0	0			0	FALSE	TRUE	FALSE	26	411	6.32603	Tnon_mito	O95425	ENSG00000197321
TAF4	Transcription initiation factor TFIID subunit 4 OS=Homo sapiens GN=TAF4 PE=1 SV=2	2	2	2		3300000	3900000				1650000	975000	0.590909	-0.758992	0.762525	0.117746	0	1950000	0	1.18182		0.241008	1	FALSE	FALSE	FALSE	48	411	11.6788	Tnon_mito	TAF2C|TAF2C1|TAF4A|TAFII130|TAFII135|O00268	ENSG00000130699
TPR	Nucleoprotein TPR OS=Homo sapiens GN=TPR PE=1 SV=3	1	1	1			2200000				0	550000	100	6.64386	0.391002	0.407821	0	1100000	0	100		6.64386	1	FALSE	FALSE	FALSE	72	411	17.5182	Tnon_mito	P12270	ENSG00000047410
TRAF3	TNF receptor-associated factor 3 OS=Homo sapiens GN=TRAF3 PE=1 SV=2	1	1	1			5900000				0	1475000	100	6.64386	0.391002	0.407821	0	2950000	0	100		6.64386	1	FALSE	FALSE	FALSE	6	411	1.45985	Tpossible_mito	CAP-1|CAP1|CD40bp|CRAF1|IIAE5|LAP1|Q13114	ENSG00000131323
TSN	Translin OS=Homo sapiens GN=TSN PE=1 SV=1	1	1	1				5200000			0	1300000	100	6.64386	0.391002	0.407821	0	2600000	0	100		6.64386	1	FALSE	FALSE	FALSE	13	411	3.16302	Tnon_mito	BCLF-1|C3PO|RCHF1|REHF-1|TBRBP|TRSLN|Q15631	ENSG00000211460
CUL3	Cullin-3 OS=Homo sapiens GN=CUL3 PE=1 SV=2	1	1	1						5000000	0	1250000	100	6.64386	0.391002	0.407821	2500000	0	100	0	6.64386		1	FALSE	FALSE	FALSE	11	411	2.6764	Tnon_mito	CUL-3|PHA2E|Q13618	ENSG00000036257
IKBKAP	Elongator complex protein 1 OS=Homo sapiens GN=IKBKAP PE=1 SV=3	6	6	12			9100000	7800000	4900000	7800000	0	7400000	100	6.64386	0.00362058	2.44122	6350000	8450000	100	100	6.64386	6.64386	4	TRUE	TRUE	TRUE	36	411	8.75912	Tnon_mito	DYS|ELP1|FD|IKAP|IKI3|TOT1|O95163	ENSG00000070061
LRRFIP1	Leucine-rich repeat flightless-interacting protein 1 OS=Homo sapiens GN=LRRFIP1 PE=1 SV=2	2	2	7	2600000	2500000		4000000	3400000	5800000	2550000	3300000	1.29412	0.371969	0.580147	0.236462	4600000	2000000	1.80392	0.784314	0.851137	-0.350497	3	FALSE	FALSE	TRUE	50	411	12.1655	Tnon_mito	FLAP-1|FLAP1|FLIIAP1|GCF-2|GCF2|HUFI-1|TRIP|Q32MZ4	ENSG00000124831
RNF40	E3 ubiquitin-protein ligase BRE1B OS=Homo sapiens GN=RNF40 PE=1 SV=4	4	6	16	6800000	4300000	4900000	7100000	5900000	7100000	5550000	6250000	1.12613	0.171368	0.676716	0.169594	6500000	6000000	1.17117	1.08108	0.227952	0.112475	4	FALSE	TRUE	TRUE	19	411	4.62287	Tnon_mito	BRE1B|RBP95|STARING|O75150	ENSG00000103549
SEC16A	Protein transport protein Sec16A OS=Homo sapiens GN=SEC16A PE=2 SV=1	1	1	1					1400000		0	350000	100	6.64386	0.391002	0.407821	700000	0	100	0	6.64386		1	FALSE	FALSE	FALSE	41	411	9.97567	Tnon_mito	KIAA0310|RP11-413M3.10|SEC16L|p250|O15027	ENSG00000148396
HDAC6	Histone deacetylase 6 OS=Homo sapiens GN=HDAC6 PE=2 SV=1	1	1	1			7600000				0	1900000	100	6.64386	0.391002	0.407821	0	3800000	0	100		6.64386	1	FALSE	FALSE	FALSE	9	411	2.18978	Tnon_mito	CPBHM|HD6|Q9UBN7	ENSG00000094631
SCAMP2	Secretory carrier-associated membrane protein 2 OS=Homo sapiens GN=SCAMP2 PE=1 SV=2	2	2	6			6400000	9900000	11000000	14000000	0	10325000	100	6.64386	0.00714213	2.14617	12500000	8150000	100	100	6.64386	6.64386	4	TRUE	FALSE	TRUE	3	411	0.729927	Tnon_mito	O15127	ENSG00000140497
SCAMP3	Secretory carrier-associated membrane protein 3 OS=Homo sapiens GN=SCAMP3 PE=1 SV=3	3	3	22	5300000	5200000	12000000	12000000	11000000	11000000	5250000	11500000	2.19048	1.13124	0.000155273	3.8089	11000000	12000000	2.09524	2.28571	1.06711	1.19265	4	TRUE	TRUE	TRUE	23	411	5.59611	Tnon_mito	C1orf3|O14828	ENSG00000116521
IPO7	Importin-7 OS=Homo sapiens GN=IPO7 PE=1 SV=1	6	6	15		2200000	11000000	8000000	7100000	8700000	1100000	8700000	7.90909	2.98351	0.0244896	1.61102	7900000	9500000	7.18182	8.63636	2.84435	3.11042	4	TRUE	TRUE	TRUE	64	411	15.5718	Tnon_mito	Imp7|RANBP7|O95373	ENSG00000205339
NCKAP1	Isoform 2 of Nck-associated protein 1 OS=Homo sapiens GN=NCKAP1	1	1	1						4000000	0	1000000	100	6.64386	0.391002	0.407821	2000000	0	100	0	6.64386		1	FALSE	FALSE	FALSE	35	411	8.51582	Tnon_mito	HEM2|NAP1|NAP125|p125Nap1|Q9Y2A7	ENSG00000061676
VPS45	Vacuolar protein sorting-associated protein 45 OS=Homo sapiens GN=VPS45 PE=1 SV=1	1	1	2	1700000		2500000				850000	625000	0.735294	-0.443607	0.849557	0.0708076	0	1250000	0	1.47059		0.556393	1	FALSE	FALSE	FALSE	0	411	0	Tnon_mito	H1|H1VPS45|SCN5|VPS45A|VPS45B|VPS54A|VSP45|VSP45A|Q9NRW7	ENSG00000136631
CNOT1	CCR4-NOT transcription complex subunit 1 OS=Homo sapiens GN=CNOT1 PE=1 SV=2	6	6	12		1700000		3800000	4100000	6300000	850000	3550000	4.17647	2.06228	0.159363	0.797614	5200000	1900000	6.11765	2.23529	2.61298	1.16046	3	FALSE	TRUE	TRUE	44	411	10.7056	Tnon_mito	CDC39|NOT1|NOT1H|A5YKK6	ENSG00000125107
ZNF292	Zinc finger protein 292 OS=Homo sapiens GN=ZNF292 PE=1 SV=3	1	1	4				37000000	50000000		0	21750000	100	6.64386	0.188719	0.724185	25000000	18500000	100	100	6.64386	6.64386	2	FALSE	FALSE	FALSE	3	411	0.729927	Tnon_mito	Nbla00365|ZFP292|ZN-16|Zn-15|bA393I2.3|O60281	ENSG00000188994
PRRC2C	Isoform 7 of Protein PRRC2C OS=Homo sapiens GN=PRRC2C	11	11	22	17000000	13000000	12000000	12000000	12000000	13000000	15000000	12250000	0.816667	-0.292181	0.397575	0.400581	12500000	12000000	0.833333	0.8	-0.263034	-0.321928	4	FALSE	TRUE	TRUE	67	411	16.3017	Tnon_mito	BAT2-iso|BAT2D1|BAT2L2|XTP2|Q9Y520	ENSG00000117523
RRP12	RRP12-like protein OS=Homo sapiens GN=RRP12 PE=1 SV=2	2	2	2			2500000		2900000		0	1350000	100	6.64386	0.183432	0.736525	1450000	1250000	100	100	6.64386	6.64386	2	FALSE	FALSE	FALSE	61	411	14.8418	Tnon_mito	KIAA0690|Q5JTH9	ENSG00000052749
CLASP1	CLIP-associating protein 1 OS=Homo sapiens GN=CLASP1 PE=1 SV=1	1	3	6			5800000		4500000		0	2575000	100	6.64386	0.186721	0.728808	2250000	2900000	100	100	6.64386	6.64386	2	FALSE	FALSE	TRUE	12	411	2.91971	Tnon_mito	MAST1|Q7Z460	ENSG00000074054
SMCHD1	Structural maintenance of chromosomes flexible hinge domain-containing protein 1 OS=Homo sapiens GN=SMCHD1 PE=1 SV=2	3	3	5	3700000	3000000					3350000	0	0		0.0662721	1.17867	0	0	0	0			0	FALSE	TRUE	TRUE	45	411	10.9489	Tnon_mito	A6NHR9	ENSG00000101596
SF3B1	Splicing factor 3B subunit 1 OS=Homo sapiens GN=SF3B1 PE=1 SV=3	26	26	105	31000000	41000000	29000000	21000000	23000000	27000000	36000000	25000000	0.694444	-0.526069	0.241964	0.616249	25000000	25000000	0.694444	0.694444	-0.526069	-0.526069	4	FALSE	TRUE	TRUE	171	411	41.6058	Tnon_mito	Hsh155|MDS|PRP10|PRPF10|SAP155|SF3b155|O75533	ENSG00000115524
SRRM2	Serine/arginine repetitive matrix protein 2 OS=Homo sapiens GN=SRRM2 PE=1 SV=2	4	4	11	7200000	6800000	7800000	6300000	7000000	6000000	7000000	6775000	0.967857	-0.047134	0.64217	0.19235	6500000	7050000	0.928571	1.00714	-0.106915	0.0102683	4	FALSE	TRUE	TRUE	141	411	34.3066	Tnon_mito	300-KD|CWF21|Cwc21|SRL300|SRm300|Q9UQ35	ENSG00000167978
RAB3GAP2	Rab3 GTPase-activating protein non-catalytic subunit OS=Homo sapiens GN=RAB3GAP2 PE=1 SV=1	3	3	3				5800000	4700000	3800000	0	3575000	100	6.64386	0.0657777	1.18192	4250000	2900000	100	100	6.64386	6.64386	3	FALSE	TRUE	FALSE	16	411	3.89294	Tnon_mito	RAB3-GAP150|RAB3GAP150|WARBM2|p150|Q9H2M9	ENSG00000118873
NELFB	Negative elongation factor B OS=Homo sapiens GN=NELFB PE=1 SV=1	1	1	4	3800000		5900000	4300000	4900000		1900000	3775000	1.98684	0.990477	0.500652	0.300464	2450000	5100000	1.28947	2.68421	0.366782	1.4245	3	FALSE	FALSE	FALSE	18	411	4.37956	Tnon_mito	COBRA1|NELF-B|Q8WX92	ENSG00000188986
CKAP2	Cytoskeleton-associated protein 2 OS=Homo sapiens GN=CKAP2 PE=1 SV=1	1	1	6	3600000	3600000	9000000	12000000	8500000	9500000	3600000	9750000	2.70833	1.43741	0.00420875	2.37585	9000000	10500000	2.5	2.91667	1.32193	1.54432	4	TRUE	FALSE	TRUE	40	411	9.73236	Tnon_mito	LB1|TMAP|se20-10|Q8WWK9	ENSG00000136108
PCDH11X	Protocadherin-11 X-linked OS=Homo sapiens GN=PCDH11X PE=2 SV=1	1	1	1						28000000	0	7000000	100	6.64386	0.391002	0.407821	14000000	0	100	0	6.64386		1	FALSE	FALSE	FALSE	0	411	0	Tnon_mito	PCDH-X|PCDH11|PCDHX|Q9BZA7	ENSG00000099715
CERS2	Ceramide synthase 2 OS=Homo sapiens GN=CERS2 PE=1 SV=1	1	1	4			20000000	18000000	17000000	18000000	0	18250000	100	6.64386	8.99696e-05	4.0459	17500000	19000000	100	100	6.64386	6.64386	4	TRUE	FALSE	FALSE	1	411	0.243309	Tnon_mito	L3|LASS2|SP260|TMSG1|Q96G23	ENSG00000143418
RBM27	RNA-binding protein 27 OS=Homo sapiens GN=RBM27 PE=1 SV=2	1	2	8					4900000	3800000	0	2175000	100	6.64386	0.186738	0.728767	4350000	0	100	100	6.64386	6.64386	2	FALSE	FALSE	TRUE	62	411	15.0852	Tnon_mito	ARRS1|Psc1|ZC3H18|Q9P2N5	ENSG00000091009
FAM208B	Protein FAM208B OS=Homo sapiens GN=FAM208B PE=1 SV=1	1	1	1	3100000						1550000	0	0		0.5	0.30103	0	0	0	0			0	FALSE	FALSE	FALSE	16	411	3.89294	Tnon_mito	C10orf18|bA318E3.2|Q5VWN6	ENSG00000108021
CCDC88A	Girdin OS=Homo sapiens GN=CCDC88A PE=1 SV=2	4	4	16	21000000	21000000	25000000	18000000	12000000	13000000	21000000	17000000	0.809524	-0.304855	0.271022	0.566996	12500000	21500000	0.595238	1.02381	-0.748461	0.0339473	4	FALSE	TRUE	TRUE	6	411	1.45985	Tnon_mito	APE|GIRDIN|GIV|GRDN|HkRP1|KIAA1212|Q3V6T2	ENSG00000115355
ENAH	Protein enabled homolog OS=Homo sapiens GN=ENAH PE=1 SV=2	8	8	27	13000000	5200000	25000000	20000000	16000000	22000000	9100000	20750000	2.28022	1.18917	0.154883	0.809996	19000000	22500000	2.08791	2.47253	1.06206	1.30599	4	FALSE	TRUE	TRUE	57	411	13.8686	Tnon_mito	ENA|MENA|NDPP1|Q8N8S7	ENSG00000154380
ASH1L	Histone-lysine N-methyltransferase ASH1L OS=Homo sapiens GN=ASH1L PE=1 SV=2	1	1	4			1700000000			1100000000	0	700000000	100	6.64386	0.195976	0.707797	550000000	850000000	100	100	6.64386	6.64386	2	FALSE	FALSE	FALSE	1	411	0.243309	Tnon_mito	ASH1|ASH1L1|KMT2H|Q9NR48	ENSG00000116539
EXOC4	Exocyst complex component 4 OS=Homo sapiens GN=EXOC4 PE=1 SV=1	1	1	2			3200000			2800000	0	1500000	100	6.64386	0.183102	0.737308	1400000	1600000	100	100	6.64386	6.64386	2	FALSE	FALSE	FALSE	43	411	10.4623	Tnon_mito	SEC8|SEC8L1|Sec8p|Q96A65	ENSG00000131558
SPCS3	Signal peptidase complex subunit 3 OS=Homo sapiens GN=SPCS3 PE=1 SV=1	1	1	1						3600000	0	900000	100	6.64386	0.391002	0.407821	1800000	0	100	0	6.64386		1	FALSE	FALSE	FALSE	11	411	2.6764	Tnon_mito	PRO3567|SPC22/23|SPC3|YLR066W|P61009	ENSG00000129128
RBM26	RNA-binding protein 26 OS=Homo sapiens GN=RBM26 PE=1 SV=3	1	2	11	2800000		4100000	4700000	3800000	4100000	1400000	4175000	2.98214	1.57635	0.2929	0.53328	3950000	4400000	2.82143	3.14286	1.49643	1.65208	4	FALSE	FALSE	TRUE	40	411	9.73236	Tnon_mito	ARRS2|C13orf10|SE70-2|ZC3H17|Q5T8P6	ENSG00000139746
LMF2	Lipase maturation factor 2 OS=Homo sapiens GN=LMF2 PE=1 SV=2	1	1	1					4700000		0	1175000	100	6.64386	0.391002	0.407821	2350000	0	100	0	6.64386		1	FALSE	FALSE	FALSE	2	411	0.486618	Tnon_mito	TMEM112B|TMEM153|Q9BU23	ENSG00000100258
JUP	Junction plakoglobin OS=Homo sapiens GN=JUP PE=1 SV=3	6	6	13	6400000	7600000	4500000	5600000	5200000	3500000	7000000	4700000	0.671429	-0.574694	0.0800524	1.09663	4350000	5050000	0.621429	0.721429	-0.68634	-0.471072	4	FALSE	TRUE	TRUE	109	411	26.5207	Tnon_mito	ARVD12|CTNNG|DP3|DPIII|PDGB|PKGB|P14923	ENSG00000173801
MCM3	DNA replication licensing factor MCM3 OS=Homo sapiens GN=MCM3 PE=1 SV=3	8	8	28	4700000	5600000	7900000	8600000	10000000	9400000	5150000	8975000	1.74272	0.80134	0.00897839	2.0468	9700000	8250000	1.8835	1.60194	0.913412	0.679822	4	TRUE	TRUE	TRUE	120	411	29.1971	Tnon_mito	HCC5|P1-MCM3|P1.h|RLFB|P25205	ENSG00000112118
TGM3	Protein-glutamine gamma-glutamyltransferase E OS=Homo sapiens GN=TGM3 PE=1 SV=4	1	1	1	3800000						1900000	0	0		0.5	0.30103	0	0	0	0			0	FALSE	FALSE	FALSE	37	411	9.00243	Tnon_mito	TGE|Q08188	ENSG00000125780
SAP18	Histone deacetylase complex subunit SAP18 OS=Homo sapiens GN=SAP18 PE=1 SV=1	1	1	2		7300000					3650000	0	0		0.5	0.30103	0	0	0	0			0	FALSE	FALSE	FALSE	59	411	14.3552	Tnon_mito	2HOR0202|SAP18P|O00422	ENSG00000150459
EXOSC2	Exosome complex component RRP4 OS=Homo sapiens GN=EXOSC2 PE=1 SV=2	1	1	2	6100000	9700000					7900000	0	0		0.142618	0.845826	0	0	0	0			0	FALSE	FALSE	FALSE	52	411	12.6521	Tnon_mito	RRP4|Rrp4p|hRrp4p|p7|Q13868	ENSG00000130713
LMAN2L	Isoform 2 of VIP36-like protein OS=Homo sapiens GN=LMAN2L	1	1	1						4400000	0	1100000	100	6.64386	0.391002	0.407821	2200000	0	100	0	6.64386		1	FALSE	FALSE	FALSE	3	411	0.729927	Tnon_mito	VIPL|Q9H0V9	ENSG00000114988
TMEM41B	Transmembrane protein 41B OS=Homo sapiens GN=TMEM41B PE=1 SV=1	1	1	1			5500000				0	1375000	100	6.64386	0.391002	0.407821	0	2750000	0	100		6.64386	1	FALSE	FALSE	FALSE	0	411	0	Tnon_mito	Q5BJD5	ENSG00000166471
ENO1	Alpha-enolase OS=Homo sapiens GN=ENO1 PE=1 SV=2	8	8	46	21000000	25000000	20000000	21000000	21000000	14000000	23000000	19000000	0.826087	-0.275634	0.24084	0.618271	17500000	20500000	0.76087	0.891304	-0.394279	-0.16601	4	FALSE	TRUE	TRUE	223	411	54.2579	Tnon_mito	ENO1L1|MPB1|NNE|PPH|P06733	ENSG00000074800
TRIP6	Thyroid receptor-interacting protein 6 OS=Homo sapiens GN=TRIP6 PE=1 SV=3	2	2	7		8200000	7200000	8000000	7500000		4100000	5675000	1.38415	0.468996	0.77122	0.112822	3750000	7600000	0.914634	1.85366	-0.128733	0.890376	3	FALSE	FALSE	TRUE	26	411	6.32603	Tnon_mito	OIP-1|OIP1|TRIP-6|TRIP6i2|ZRP-1|Q15654	ENSG00000087077
PAIP1	Polyadenylate-binding protein-interacting protein 1 OS=Homo sapiens GN=PAIP1 PE=1 SV=1	1	1	1						4300000	0	1075000	100	6.64386	0.391002	0.407821	2150000	0	100	0	6.64386		1	FALSE	FALSE	FALSE	7	411	1.70316	Tnon_mito	Q9H074	ENSG00000172239
STAMBP	STAM-binding protein OS=Homo sapiens GN=STAMBP PE=1 SV=1	1	1	4	250000000	380000000	410000000	500000000			315000000	227500000	0.722222	-0.469485	0.585941	0.232146	0	455000000	0	1.44444		0.530515	2	FALSE	FALSE	FALSE	0	411	0	Tnon_mito	AMSH|MICCAP|O95630	ENSG00000124356
CCDC8	Coiled-coil domain-containing protein 8 OS=Homo sapiens GN=CCDC8 PE=1 SV=2	8	8	16	6300000	6000000	16000000	7700000	15000000	10000000	6150000	12175000	1.97967	0.985263	0.0557678	1.25362	12500000	11850000	2.03252	1.92683	1.02327	0.946229	4	FALSE	TRUE	TRUE	5	411	1.21655	Tnon_mito	3M3|PPP1R20|p90|Q9H0W5	ENSG00000169515
CALM2	Calmodulin (Fragment) OS=Homo sapiens GN=CALM2 PE=2 SV=1	5	5	34	64000000	53000000	61000000	70000000	74000000	77000000	58500000	70500000	1.20513	0.269187	0.215893	0.665761	75500000	65500000	1.2906	1.11966	0.36804	0.163058	4	FALSE	TRUE	TRUE	133	411	32.3601	Tnon_mito	CAMII|PHKD|PHKD2|Q96HY3	ENSG00000143933
S100A12	Protein S100-A12 OS=Homo sapiens GN=S100A12 PE=1 SV=2	1	1	1			1400000000				0	350000000	100	6.64386	0.391002	0.407821	0	700000000	0	100		6.64386	1	FALSE	FALSE	FALSE	2	411	0.486618	Tnon_mito	CAAF1|CAGC|CGRP|ENRAGE|MRP-6|MRP6|p6|P80511	ENSG00000163221
SFPQ	Splicing factor, proline- and glutamine-rich OS=Homo sapiens GN=SFPQ PE=1 SV=2	10	11	84	49000000	48000000	50000000	50000000	67000000	74000000	48500000	60250000	1.24227	0.312976	0.148892	0.827127	70500000	50000000	1.45361	1.03093	0.539639	0.0439433	4	FALSE	TRUE	TRUE	201	411	48.9051	Tnon_mito	POMP100|PSF|P23246	ENSG00000116560
MYL12A	Myosin regulatory light chain 12A OS=Homo sapiens GN=MYL12A PE=4 SV=1	7	7	39	15000000	13000000	20000000	19000000	23000000	26000000	14000000	22000000	1.57143	0.652077	0.0130761	1.88352	24500000	19500000	1.75	1.39286	0.807355	0.478047	4	TRUE	TRUE	TRUE	145	411	35.2798	Tnon_mito	HEL-S-24|MLCB|MRCL3|MRLC3|MYL2B|P19105	ENSG00000101608
UBQLN2	Ubiquilin-2 OS=Homo sapiens GN=UBQLN2 PE=1 SV=2	2	3	11			5000000	5100000	4400000	2900000	0	4350000	100	6.64386	0.00333651	2.47671	3650000	5050000	100	100	6.64386	6.64386	4	TRUE	FALSE	TRUE	20	411	4.86618	Tnon_mito	ALS15|CHAP1|DSK2|N4BP4|PLIC2|Q9UHD9	ENSG00000188021
CALML5	Calmodulin-like protein 5 OS=Homo sapiens GN=CALML5 PE=1 SV=2	1	1	2	13000000					8500000	6500000	2125000	0.326923	-1.61298	0.621259	0.206727	4250000	0	0.653846	0	-0.612977		1	FALSE	FALSE	FALSE	53	411	12.8954	Tnon_mito	CLSP|Q9NZT1	ENSG00000178372
KIF4B	Chromosome-associated kinesin KIF4B OS=Homo sapiens GN=KIF4B PE=2 SV=2	1	1	7			15000000000	21000000000	14000000000	5500000000	0	13875000000	100	6.64386	0.0224628	1.64854	9750000000	18000000000	100	100	6.64386	6.64386	4	TRUE	FALSE	TRUE	30	411	7.29927	Tnon_mito	Q2VIQ3	ENSG00000226650
CAPZA2	F-actin-capping protein subunit alpha-2 OS=Homo sapiens GN=CAPZA2 PE=1 SV=3	4	6	17	11000000	11000000	7300000			8800000	11000000	4025000	0.365909	-1.45044	0.058795	1.23066	4400000	3650000	0.4	0.331818	-1.32193	-1.59154	2	FALSE	TRUE	TRUE	92	411	22.3844	Tnon_mito	CAPPA2|CAPZ|P47755	ENSG00000198898
CLGN	Calmegin OS=Homo sapiens GN=CLGN PE=1 SV=1	1	1	1						7400000	0	1850000	100	6.64386	0.391002	0.407821	3700000	0	100	0	6.64386		1	FALSE	FALSE	FALSE	0	411	0	Tnon_mito	O14967	ENSG00000153132
HMOX1	Heme oxygenase 1 OS=Homo sapiens GN=HMOX1 PE=1 SV=1	5	5	22	5200000	5000000	15000000	13000000	14000000	16000000	5100000	14500000	2.84314	1.50748	0.000568496	3.24527	15000000	14000000	2.94118	2.7451	1.55639	1.45686	4	TRUE	TRUE	TRUE	3	411	0.729927	Tnon_mito	HMOX1D|HO-1|HSP32|bK286B10|P09601	ENSG00000100292
STT3A	Dolichyl-diphosphooligosaccharide--protein glycosyltransferase subunit STT3A OS=Homo sapiens GN=STT3A PE=1 SV=2	4	4	6			8500000	6600000		9400000	0	6125000	100	6.64386	0.063297	1.19862	4700000	7550000	100	100	6.64386	6.64386	3	FALSE	TRUE	TRUE	23	411	5.59611	Tnon_mito	ITM1|STT3-A|TMC|P46977	ENSG00000134910
NACA	Nascent polypeptide-associated complex subunit alpha, muscle-specific form OS=Homo sapiens GN=NACA PE=1 SV=1	4	4	13	10000000	12000000	19000000	15000000	13000000	16000000	11000000	15750000	1.43182	0.517848	0.0467589	1.33014	14500000	17000000	1.31818	1.54545	0.398549	0.628031	4	TRUE	TRUE	TRUE	125	411	30.4136	Tnon_mito	NACA1|E9PAV3	ENSG00000196531
PRKAR2A	cAMP-dependent protein kinase type II-alpha regulatory subunit OS=Homo sapiens GN=PRKAR2A PE=1 SV=2	1	1	2			7300000		5800000		0	3275000	100	6.64386	0.185836	0.73087	2900000	3650000	100	100	6.64386	6.64386	2	FALSE	FALSE	FALSE	34	411	8.27251	Tnon_mito	PKR2|PRKAR2|P13861	ENSG00000114302
PSMD2	26S proteasome non-ATPase regulatory subunit 2 OS=Homo sapiens GN=PSMD2 PE=1 SV=3	20	20	113	27000000	24000000	52000000	58000000	55000000	61000000	25500000	56500000	2.21569	1.14775	0.000356031	3.44851	58000000	55000000	2.27451	2.15686	1.18556	1.10893	4	TRUE	TRUE	TRUE	124	411	30.1703	Tnon_mito	P97|RPN1|S2|TRAP2|Q13200	ENSG00000175166
SNRPD1	Small nuclear ribonucleoprotein Sm D1 OS=Homo sapiens GN=SNRPD1 PE=1 SV=1	4	4	67	250000000	280000000	230000000	210000000	220000000	220000000	265000000	220000000	0.830189	-0.268489	0.184544	0.733901	220000000	220000000	0.830189	0.830189	-0.268489	-0.268489	4	FALSE	TRUE	TRUE	193	411	46.9586	Tnon_mito	HsT2456|SMD1|SNRPD|Sm-D1|P62314	ENSG00000167088
SSR1	Translocon-associated protein subunit alpha OS=Homo sapiens GN=SSR1 PE=2 SV=1	1	1	1						4000000	0	1000000	100	6.64386	0.391002	0.407821	2000000	0	100	0	6.64386		1	FALSE	FALSE	FALSE	19	411	4.62287	Tnon_mito	TRAPA|P43307	ENSG00000124783
SURF4	Surfeit locus protein 4 OS=Homo sapiens GN=SURF4 PE=1 SV=3	1	1	7			3700000	4900000	5400000	7200000	0	5300000	100	6.64386	0.00532541	2.27365	6300000	4300000	100	100	6.64386	6.64386	4	TRUE	FALSE	TRUE	35	411	8.51582	Tnon_mito	ERV29|O15260	ENSG00000148248
XPO1	Exportin-1 OS=Homo sapiens GN=XPO1 PE=1 SV=1	9	9	26			17000000	16000000	18000000	16000000	0	16750000	100	6.64386	5.13308e-05	4.28962	17000000	16500000	100	100	6.64386	6.64386	4	TRUE	TRUE	TRUE	95	411	23.1144	Tnon_mito	CRM1|emb|exp1|O14980	ENSG00000082898
EIF3F	Eukaryotic translation initiation factor 3 subunit F OS=Homo sapiens GN=EIF3F PE=2 SV=1	11	11	117	140000000	200000000	100000000	88000000	100000000	110000000	170000000	99500000	0.585294	-0.772766	0.249954	0.60214	105000000	94000000	0.617647	0.552941	-0.695145	-0.854802	4	FALSE	TRUE	TRUE	112	411	27.2506	Tnon_mito	EIF3S5|eIF3-p47|O00303	ENSG00000175390
TM9SF2	Transmembrane 9 superfamily member 2 OS=Homo sapiens GN=TM9SF2 PE=1 SV=1	3	3	8			14000000	9300000	9800000	10000000	0	10775000	100	6.64386	0.00217227	2.66309	9900000	11650000	100	100	6.64386	6.64386	4	TRUE	TRUE	TRUE	1	411	0.243309	Tnon_mito	P76|Q99805	ENSG00000125304
CKAP5	Cytoskeleton-associated protein 5 OS=Homo sapiens GN=CKAP5 PE=1 SV=3	45	45	263	56000000	73000000	72000000	79000000	95000000	99000000	64500000	86250000	1.33721	0.419225	0.164873	0.782851	97000000	75500000	1.50388	1.17054	0.588686	0.227177	4	FALSE	TRUE	TRUE	84	411	20.438	Tnon_mito	CHTOG|MSPS|TOG|TOGp|ch-TOG|Q14008	ENSG00000175216
TOM1	Isoform 2 of Target of Myb protein 1 OS=Homo sapiens GN=TOM1	1	1	1						1200000	0	300000	100	6.64386	0.391002	0.407821	600000	0	100	0	6.64386		1	FALSE	FALSE	FALSE	1	411	0.243309	Tnon_mito	O60784	ENSG00000100284
ACTR1A	Alpha-centractin OS=Homo sapiens GN=ACTR1A PE=1 SV=1	9	9	62	35000000	35000000	38000000	37000000	43000000	45000000	35000000	40750000	1.16429	0.219445	0.0587111	1.23128	44000000	37500000	1.25714	1.07143	0.330149	0.0995357	4	FALSE	TRUE	TRUE	95	411	23.1144	Tnon_mito	ARP1|CTRN1|P61163	ENSG00000138107
EIF3M	Eukaryotic translation initiation factor 3 subunit M OS=Homo sapiens GN=EIF3M PE=1 SV=1	15	15	142	59000000	72000000	49000000	50000000	54000000	54000000	65500000	51750000	0.790076	-0.339936	0.270817	0.567324	54000000	49500000	0.824427	0.755725	-0.278535	-0.404066	4	FALSE	TRUE	TRUE	65	411	15.8151	Tnon_mito	B5|PCID1|TANGO7|hfl-B5|Q7L2H7	ENSG00000149100
IQGAP2	Ras GTPase-activating-like protein IQGAP2 OS=Homo sapiens GN=IQGAP2 PE=1 SV=4	2	2	2				4200000		4800000	0	2250000	100	6.64386	0.183102	0.737308	2400000	2100000	100	100	6.64386	6.64386	2	FALSE	FALSE	FALSE	23	411	5.59611	Tnon_mito	Q13576	ENSG00000145703
COPG1	Coatomer subunit gamma-1 OS=Homo sapiens GN=COPG1 PE=1 SV=1	5	6	21		3600000	6500000	7500000	6500000	7300000	1800000	6950000	3.86111	1.94902	0.207791	0.682374	6900000	7000000	3.83333	3.88889	1.9386	1.95936	4	FALSE	TRUE	TRUE	78	411	18.9781	Tnon_mito	COPG|Q9Y678	ENSG00000181789
CLASP2	CLIP-associating protein 2 OS=Homo sapiens GN=CLASP2 PE=2 SV=1	4	6	13	2400000			8000000	7600000	6600000	1200000	5550000	4.625	2.20945	0.12284	0.910661	7100000	4000000	5.91667	3.33333	2.56478	1.73697	3	FALSE	TRUE	TRUE	48	411	11.6788	Tnon_mito	O75122	ENSG00000163539
FAF2	FAS-associated factor 2 OS=Homo sapiens GN=FAF2 PE=1 SV=2	1	1	1			6500000				0	1625000	100	6.64386	0.391002	0.407821	0	3250000	0	100		6.64386	1	FALSE	FALSE	FALSE	25	411	6.08273	Tnon_mito	ETEA|UBXD8|UBXN3B|Q96CS3	ENSG00000113194
NOMO1	Nodal modulator 1 OS=Homo sapiens GN=NOMO1 PE=1 SV=5	15	15	57	10000000	12000000	11000000	10000000	13000000	13000000	11000000	11750000	1.06818	0.0951572	0.604329	0.218726	13000000	10500000	1.18182	0.954545	0.241008	-0.0671142	4	FALSE	TRUE	TRUE	19	411	4.62287	Tnon_mito	Nomo|PM5|Q15155	ENSG00000103512
SDF2L1	Stromal cell-derived factor 2-like protein 1 OS=Homo sapiens GN=SDF2L1 PE=1 SV=2	2	2	3	6900000				10000000		3450000	2500000	0.724638	-0.464668	0.843128	0.0741064	5000000	0	1.44928	0	0.535332		1	FALSE	FALSE	FALSE	5	411	1.21655	Tnon_mito	Q9HCN8	ENSG00000128228
COPG2	Coatomer subunit gamma-2 OS=Homo sapiens GN=COPG2 PE=1 SV=1	4	5	18			9700000	5600000	10000000	9600000	0	8725000	100	6.64386	0.00360323	2.44331	9800000	7650000	100	100	6.64386	6.64386	4	TRUE	TRUE	TRUE	67	411	16.3017	Tnon_mito	2-COP|Q9UBF2	ENSG00000158623
C14orf166	UPF0568 protein C14orf166 OS=Homo sapiens GN=C14orf166 PE=1 SV=1	10	10	92	57000000	54000000	45000000	46000000	60000000	59000000	55500000	52500000	0.945946	-0.0801703	0.528868	0.276653	59500000	45500000	1.07207	0.81982	0.100402	-0.286621	4	FALSE	TRUE	TRUE	92	411	22.3844	Tnon_mito	CGI99|CLE|CLE7|LCRP369|RLLM1|Q9Y224	ENSG00000087302
DPM3	Isoform 2 of Dolichol-phosphate mannosyltransferase subunit 3 OS=Homo sapiens GN=DPM3	1	1	7	6500000		16000000	13000000	13000000	15000000	3250000	14250000	4.38462	2.13245	0.16762	0.775674	14000000	14500000	4.30769	4.46154	2.10692	2.15754	4	FALSE	FALSE	TRUE	4	411	0.973236	Tnon_mito	CDG1O|Q9P2X0	ENSG00000179085
ELOVL1	Elongation of very long chain fatty acids protein 1 OS=Homo sapiens GN=ELOVL1 PE=1 SV=1	1	1	1						2500000	0	625000	100	6.64386	0.391002	0.407821	1250000	0	100	0	6.64386		1	FALSE	FALSE	FALSE	23	411	5.59611	Tnon_mito	Ssc1|Q9BW60	ENSG00000066322
MARCKSL1	MARCKS-related protein OS=Homo sapiens GN=MARCKSL1 PE=1 SV=2	4	4	37	81000000	74000000	77000000	71000000	76000000	75000000	77500000	74750000	0.964516	-0.0521227	0.572141	0.242497	75500000	74000000	0.974194	0.954839	-0.0377197	-0.066671	4	FALSE	TRUE	TRUE	52	411	12.6521	Tnon_mito	F52|MACMARCKS|MLP|MLP1|MRP|P49006	ENSG00000175130
KCTD12	BTB/POZ domain-containing protein KCTD12 OS=Homo sapiens GN=KCTD12 PE=1 SV=1	1	1	4			4100000	4600000	4700000	4400000	0	4450000	100	6.64386	5.77521e-05	4.23843	4550000	4350000	100	100	6.64386	6.64386	4	TRUE	FALSE	FALSE	19	411	4.62287	Tnon_mito	C13orf2|PFET1|PFETIN|Q96CX2	ENSG00000178695
ATP1B3	Sodium/potassium-transporting ATPase subunit beta-3 OS=Homo sapiens GN=ATP1B3 PE=1 SV=1	1	1	4	4400000	3400000		8400000	11000000		3900000	4850000	1.24359	0.314511	0.763121	0.117407	5500000	4200000	1.41026	1.07692	0.495957	0.106915	2	FALSE	FALSE	FALSE	18	411	4.37956	Tnon_mito	ATPB-3|CD298|P54709	ENSG00000069849
CNN3	Calponin-3 OS=Homo sapiens GN=CNN3 PE=1 SV=1	4	4	11	6200000	6000000	9500000	10000000	8800000	8800000	6100000	9275000	1.52049	0.604538	0.00086231	3.06434	8800000	9750000	1.44262	1.59836	0.528694	0.676593	4	TRUE	TRUE	TRUE	45	411	10.9489	Tnon_mito	Q15417	ENSG00000117519
CSRP2	Cysteine and glycine-rich protein 2 OS=Homo sapiens GN=CSRP2 PE=2 SV=1	2	2	4	3800000	3800000				7300000	3800000	1825000	0.480263	-1.0581	0.358393	0.445641	3650000	0	0.960526	0	-0.058103		1	FALSE	FALSE	FALSE	52	411	12.6521	Tnon_mito	CRP2|LMO5|SmLIM|Q16527	ENSG00000175183
EEF1D	Elongation factor 1-delta OS=Homo sapiens GN=EEF1D PE=1 SV=5	2	13	108	140000000	100000000	80000000	140000000	98000000	160000000	120000000	119500000	0.995833	-0.00602379	0.986585	0.0058656	129000000	110000000	1.075	0.916667	0.104337	-0.125531	4	FALSE	FALSE	TRUE	157	411	38.1995	Tnon_mito	EF-1D|EF1D|FP1047|P29692	ENSG00000104529
EEF1D	Isoform 3 of Elongation factor 1-delta OS=Homo sapiens GN=EEF1D	1	12	99	5700000	5400000	6700000		7400000	8700000	5550000	5700000	1.02703	0.0384741	0.943487	0.0252639	8050000	3350000	1.45045	0.603604	0.536501	-0.728327	3	FALSE	FALSE	TRUE	157	411	38.1995	Tnon_mito	EF-1D|EF1D|FP1047|P29692	ENSG00000104529
GTF2I	General transcription factor II-I OS=Homo sapiens GN=GTF2I PE=1 SV=2	24	24	123	47000000	46000000	43000000	36000000	46000000	43000000	46500000	42000000	0.903226	-0.146841	0.122285	0.912628	44500000	39500000	0.956989	0.849462	-0.0634254	-0.235378	4	FALSE	TRUE	TRUE	141	411	34.3066	Tnon_mito	BAP135|BTKAP1|DIWS|GTFII-I|IB291|SPIN|TFII-I|WBS|WBSCR6|P78347	ENSG00000077809
HDAC2	Histone deacetylase 2 OS=Homo sapiens GN=HDAC2 PE=2 SV=1	1	4	22	11000000	14000000	13000000	12000000	14000000	16000000	12500000	13750000	1.1	0.137504	0.555714	0.255149	15000000	12500000	1.2	1	0.263034	0	4	FALSE	FALSE	TRUE	115	411	27.9805	Tnon_mito	HD2|RPD3|YAF1|Q92769	ENSG00000196591
KPNA3	Importin subunit alpha-4 OS=Homo sapiens GN=KPNA3 PE=1 SV=2	1	1	1					4900000		0	1225000	100	6.64386	0.391002	0.407821	2450000	0	100	0	6.64386		1	FALSE	FALSE	FALSE	44	411	10.7056	Tnon_mito	IPOA4|SRP1|SRP1gamma|SRP4|hSRP1|O00505	ENSG00000102753
PLOD1	Procollagen-lysine,2-oxoglutarate 5-dioxygenase 1 OS=Homo sapiens GN=PLOD1 PE=2 SV=1	4	4	15	5600000	6500000	7600000	6300000	7100000	7900000	6050000	7225000	1.19421	0.256062	0.158788	0.799182	7500000	6950000	1.23967	1.14876	0.309955	0.200078	4	FALSE	TRUE	TRUE	26	411	6.32603	Tnon_mito	EDS6|LH|LH1|LLH|PLOD|Q02809	ENSG00000083444
PPP2CB	Serine/threonine-protein phosphatase 2A catalytic subunit beta isoform OS=Homo sapiens GN=PPP2CB PE=1 SV=1	2	2	4	6700000	4000000			8900000	7700000	5350000	4150000	0.775701	-0.366428	0.686271	0.163504	8300000	0	1.5514	0	0.633572		2	FALSE	FALSE	FALSE	84	411	20.438	Tnon_mito	PP2Abeta|PP2CB|P62714	ENSG00000104695
PPP4C	Serine/threonine-protein phosphatase 4 catalytic subunit OS=Homo sapiens GN=PPP4C PE=1 SV=1	2	2	4	6600000	9000000		9900000	14000000		7800000	5975000	0.766026	-0.384535	0.65449	0.184097	7000000	4950000	0.897436	0.634615	-0.156119	-0.656046	2	FALSE	FALSE	FALSE	14	411	3.40633	Tnon_mito	PP4|PP4C|PPH3|PPP4|PPX|P60510	ENSG00000149923
PRPS1	Ribose-phosphate pyrophosphokinase 1 OS=Homo sapiens GN=PRPS1 PE=1 SV=2	5	10	93	52000000	53000000	63000000	58000000	61000000	76000000	52500000	64500000	1.22857	0.296982	0.0554573	1.25604	68500000	60500000	1.30476	1.15238	0.383787	0.204618	4	FALSE	TRUE	TRUE	119	411	28.9538	Tnon_mito	ARTS|CMTX5|DFN2|DFNX1|PPRibP|PRS-I|PRSI|P60891	ENSG00000147224
SMN1	Survival motor neuron protein OS=Homo sapiens GN=SMN1 PE=4 SV=1	4	4	9	5700000	8500000	17000000	14000000	21000000		7100000	13000000	1.83099	0.872621	0.29303	0.533087	10500000	15500000	1.47887	2.1831	0.564498	1.12638	3	FALSE	TRUE	TRUE	49	411	11.9221	Tnon_mito	BCD541|GEMIN1|SMA|SMA1|SMA2|SMA3|SMA4|SMA@|SMN|SMNT|T-BCD541|TDRD16A	ENSG00000172062
SUMO3	Small ubiquitin-related modifier 3 OS=Homo sapiens GN=SUMO3 PE=2 SV=1	1	1	6	16000000	15000000	13000000	12000000	12000000	9900000	15500000	11725000	0.756452	-0.40268	0.0119932	1.92107	10950000	12500000	0.706452	0.806452	-0.501337	-0.31034	4	TRUE	FALSE	TRUE	76	411	18.4915	Tnon_mito	SMT3A|SMT3H1|SUMO-3|Smt3B|P55854	ENSG00000184900
[truncated: 250 more rows]

## Sheet: WT-ACPM-Mitochondrial HITS
Gene	Protein Description	# Unique Peptides	# Peptides	# PSMs	Areas: Control -1	Areas: Control -2	Areas: BioRep1- (Injection1)	Areas: BioRep1 (Injection2)	Areas: BioRep2 (Injection1)	Areas: BioRep2 (Injection2)	Avg Areas - Control Samples	Avg Areas - Samples	Fold Change (Sample/Control)	Log2 Fold Change (FC)	p-Value	NegLog10 Pval	Avg Sample_BR1	Avg Sample _BR2	Fold Change_BR1	Fold Change_BR2	Log2_FoldChange_BR1	Log2_FoldChange_BR2	Detected in # Injections	Is pval<0.05?	>3 Unq Peptides?	>5 PSMs?	# Datasets protein found in Crapome	Total Crapome Datasets	% Crapome Probability	MitoCarta2.0 Dataset Annotation	Protein Synonyms	EnsemblGeneID
[truncated: 72 more rows]

[truncated: 1 more sheets: WT-ACPM-NonMito Hits]
