# Supplementary material for: 4′-Phosphopantetheine and long acyl chain-dependent interactions are integral to human mitochondrial acyl carrier protein function
Source: Royal Society of Chemistry journal article supplement (doi:10.1039/c8md00489g), 2019-01-01
Supplement: c8md00489g3.xlsx [file c8md00489g3.xlsx]

## Sheet: ISD11_PullDown_All Proteins
	LEGEND
	Gene - Represents gene name for protein			Avg Areas - Control Samples - Avg Areas of Both control injections							Log2_FoldChange_BR1 - Log(base2) value for BR1 fold change														MitoCarta2.0 Dataset Annotation - How is a protein defined by the MitoCarts 2.0 database?
	Protein Description - Description of protein			Avg Areas - Samples - Avg Areas of both biological replicates							Log2_FoldChange_BR2 - Log(base2) value for BR2 fold change														Protein Synonyms - All synonyms for the protein
	# Unique Peptides - Number of unique peptides detected for particular protein			Fold Change (Sample/Control) - Ratio of Avg Sample/Avg Control							Detected in # Injections - Times a protein was detected in the sample injections														EnsemblGeneID - The Ensenbl gene ID
	# Peptides - Number of total peptides detected for a protein (including shared ones)			Log2 Fold Change (FC) - LOg2 value for Fold Change							Is pValue <= 0.05? - True or false argument for significance of pvalue
	#PSMs - Number of Peptide Spectral Matches for specific protein			p-Value - p-value od determined by the student's t-test							> 3 Unique peptides? - True or false argument for protein having at least 3 unique peptides
	Areas: Control 1 - Total protein area in control sample 1			NegLog10Pval - Negative log (base10) value of the p-value							> 5 PSMs? - True or false argument for a protein having at least 5 peptide spectral matches
	Areas: Control 2 - Total protein area in control sample 2			Avg Sample_BR1 - Avg areas for BR1 (both injections)							# Datasets protein found in Crapome - How many times is a protein detected as a contaminant in the crapome respostory?
	Areas: BioRep1 - Injection 1 - Total protein area in 1st biological replicate, Injection 1			Avg Sample_BR - Avg areas for BR2 (both injections)							Total Crapome Datasets - Total number of affinity purification datasets in the crapome repository
	Areas: BioRep1 - Injection 2 - Total protein area in 1st biological replicate, Injection 2			Fold Change_BR1 - Ratio of Avg areas for BR1/Avg Control							% Crapome probability - Percentage of the ratio of columsn AB and AC
	Areas: BioRep2 - Injection 1 - Total protein area in 2nd biological replicate, Injection 1			Fold Change_BR2 - Ratio of Avg areas for BR2/Avg Control
	Areas: BioRep2 - Injection 1 - Total protein area in 2nd biological replicate, Injection 2
Gene	Protein Description	# Unique Peptides	# Peptides	# PSMs	Areas: Control -1	Areas: Control -2	Areas: BioRep1- (Injection1)	Areas: BioRep1 (Injection2)	Areas: BioRep2 (Injection1)	Areas: BioRep2 (Injection2)	Avg Areas - Control Samples	Avg Areas - Samples	Fold Change (Sample/Control)	Log2 Fold Change (FC)	p-Value	NegLog10 Pval	Avg Sample_BR1	Avg Sample _BR2	Fold Change_BR1	Fold Change_BR2	Log2_FoldChange_BR1	Log2_FoldChange_BR2	Detected in # Injections	Is pval<0.05?	>3 Unq Peptides?	>5 PSMs?	# Datasets protein found in Crapome	Total Crapome Datasets	% Crapome Probability	MitoCarta2.0 Dataset Annotation	Protein Synonyms	EnsemblGeneID
CYC1	Cytochrome c1, heme protein, mitochondrial OS=Homo sapiens GN=CYC1 PE=1 SV=3	2	2	5		33000000	47000000	45000000		48000000	16500000	35000000	2.12121	1.08489	0.453559	0.343366	24000000	22500000	1.45455	1.36364	0.540568	0.447459	3	FALSE	FALSE	TRUE	9	411	2.18978	Tmito	MC3DN6|UQCR4|P08574	ENSG00000179091
SDHB	Succinate dehydrogenase [ubiquinone] iron-sulfur subunit, mitochondrial OS=Homo sapiens GN=SDHB PE=1 SV=3	5	5	15	30000000	35000000	41000000	61000000	45000000	50000000	32500000	49250000	1.51538	0.599684	0.0285318	1.54467	47500000	53000000	1.46154	1.63077	0.547488	0.705553	4	TRUE	TRUE	TRUE	18	411	4.37956	Tmito	CWS2|IP|PGL4|SDH|SDH1|SDH2|SDHIP|P21912	ENSG00000117118
SDHA	Succinate dehydrogenase [ubiquinone] flavoprotein subunit, mitochondrial OS=Homo sapiens GN=SDHA PE=1 SV=2	12	12	93	110000000	110000000	200000000	200000000	130000000	150000000	110000000	170000000	1.54545	0.628031	0.043356	1.36295	140000000	165000000	1.27273	1.5	0.347923	0.584963	4	TRUE	TRUE	TRUE	44	411	10.7056	Tmito	CMD1GG|FP|PGL5|SDH1|SDH2|SDHF|P31040	ENSG00000073578
UQCRC1	Cytochrome b-c1 complex subunit 1, mitochondrial OS=Homo sapiens GN=UQCRC1 PE=1 SV=3	7	7	26	37000000	46000000	46000000	56000000	48000000	58000000	41500000	52000000	1.25301	0.3254	0.19526	0.709387	53000000	52000000	1.27711	1.25301	0.352881	0.3254	4	FALSE	TRUE	TRUE	30	411	7.29927	Tmito	D3S3191|QCR1|UQCR1|P31930	ENSG00000010256
COQ5	2-methoxy-6-polyprenyl-1,4-benzoquinol methylase, mitochondrial OS=Homo sapiens GN=COQ5 PE=1 SV=2	4	4	10			26000000	23000000	27000000	20000000	0	24000000	100	6.64386	0.000620873	3.207	23500000	25000000	100	100	6.64386	6.64386	4	TRUE	TRUE	TRUE	0	411	0	Tmito	Q5HYK3	ENSG00000110871
PDHA1	Isoform 4 of Pyruvate dehydrogenase E1 component subunit alpha, somatic form, mitochondrial OS=Homo sapiens GN=PDHA1	6	6	24	98000000	92000000	43000000	81000000	80000000	70000000	95000000	68500000	0.721053	-0.471824	0.0535273	1.27143	75000000	80500000	0.789474	0.847368	-0.341037	-0.238939	4	FALSE	TRUE	TRUE	47	411	11.4355	Tmito	PDHA|PDHCE1A|PHE1A|P08559	ENSG00000131828
COQ9	Ubiquinone biosynthesis protein COQ9, mitochondrial OS=Homo sapiens GN=COQ9 PE=1 SV=1	3	3	9	46000000	53000000	66000000	100000000	58000000	66000000	49500000	72500000	1.46465	0.550552	0.0884792	1.05316	62000000	79000000	1.25253	1.59596	0.32484	0.674424	4	FALSE	TRUE	TRUE	0	411	0	Tmito	C16orf49|COQ10D5|O75208	ENSG00000088682
MRPL12	39S ribosomal protein L12, mitochondrial OS=Homo sapiens GN=MRPL12 PE=1 SV=2	1	7	50	140000000	51000000	54000000	100000000	57000000	28000000	95500000	59750000	0.625654	-0.676562	0.56507	0.247898	42500000	78500000	0.445026	0.82199	-1.16804	-0.282808	4	FALSE	TRUE	TRUE	74	411	18.0049	Tmito	5c5-2|L12mt|MRP-L31/34|MRPL7|MRPL7/L12|RPML12|P52815	ENSG00000262814
ATP5D	ATP synthase subunit delta, mitochondrial OS=Homo sapiens GN=ATP5D PE=1 SV=2	2	2	15	84000000	68000000	100000000	110000000	78000000	100000000	76000000	97000000	1.27632	0.351985	0.156237	0.806217	89000000	94000000	1.17105	1.23684	0.227806	0.306661	4	FALSE	FALSE	TRUE	21	411	5.10949	Tmito	P30049	ENSG00000099624
COX5A	Cytochrome c oxidase subunit 5A, mitochondrial OS=Homo sapiens GN=COX5A PE=1 SV=2	4	4	22	73000000	79000000	140000000	100000000	120000000	79000000	76000000	109750000	1.44408	0.53015	0.0793694	1.10035	99500000	110000000	1.30921	1.44737	0.388697	0.533432	4	FALSE	TRUE	TRUE	24	411	5.83942	Tmito	COX|COX-VA|VA|P20674	ENSG00000178741
ISCA2	Iron-sulfur cluster assembly 2 homolog, mitochondrial OS=Homo sapiens GN=ISCA2 PE=1 SV=2	1	1	2	21000000	17000000					19000000	0	0		0.0667667	1.17544	0	0	0	0			0	FALSE	FALSE	FALSE	1	411	0.243309	Tmito	HBLD1|ISA2|c14_5557|Q86U28	ENSG00000165898
PMPCB	Mitochondrial-processing peptidase subunit beta OS=Homo sapiens GN=PMPCB PE=3 SV=1	9	9	47	73000000	70000000	83000000	95000000	84000000	60000000	71500000	80500000	1.12587	0.171046	0.310819	0.507492	72000000	89500000	1.00699	1.25175	0.0100537	0.323944	4	FALSE	TRUE	TRUE	31	411	7.54258	Tmito	Beta-MPP|MPP11|MPPB|MPPP52|P-52|O75439	ENSG00000105819
ATP5A1	ATP synthase subunit alpha, mitochondrial OS=Homo sapiens GN=ATP5A1 PE=1 SV=1	19	19	137	320000000	420000000	370000000	480000000	530000000	310000000	370000000	422500000	1.14189	0.191426	0.512323	0.290456	420000000	505000000	1.13514	1.36486	0.182864	0.448758	4	FALSE	TRUE	TRUE	210	411	51.0949	Tmito	ATP5A|ATP5AL2|ATPM|HEL-S-123m|MC5DN4|MOM2|OMR|ORM|hATP1|P25705	ENSG00000152234
OGDH	2-oxoglutarate dehydrogenase, mitochondrial OS=Homo sapiens GN=OGDH PE=2 SV=1	2	2	4			21000000	28000000	17000000	18000000	0	21000000	100	6.64386	0.00347094	2.45955	17500000	22500000	100	100	6.64386	6.64386	4	TRUE	FALSE	FALSE	32	411	7.78589	Tmito	AKGDH|E1k|OGDC|Q02218	ENSG00000105953
PDHB	Pyruvate dehydrogenase E1 component subunit beta, mitochondrial OS=Homo sapiens GN=PDHB PE=1 SV=3	8	8	32	91000000	46000000	39000000	82000000	80000000	74000000	68500000	68750000	1.00365	0.00525573	0.993143	0.00298836	77000000	81000000	1.12409	1.18248	0.168754	0.241818	4	FALSE	TRUE	TRUE	52	411	12.6521	Tmito	PDHBD|PDHE1-B|PHE1B|P11177	ENSG00000168291
UQCRC2	Cytochrome b-c1 complex subunit 2, mitochondrial OS=Homo sapiens GN=UQCRC2 PE=1 SV=3	2	2	8	46000000	35000000	39000000	51000000	42000000	76000000	40500000	52000000	1.28395	0.36059	0.316597	0.499494	59000000	46500000	1.45679	1.14815	0.542793	0.199309	4	FALSE	FALSE	TRUE	38	411	9.24574	Tmito	MC3DN5|QCR2|UQCR2|P22695	ENSG00000140740
MRPS35	28S ribosomal protein S35, mitochondrial OS=Homo sapiens GN=MRPS35 PE=1 SV=1	3	3	11	15000000	17000000	42000000	26000000	20000000	22000000	16000000	27500000	1.71875	0.78136	0.102709	0.988392	21000000	23000000	1.3125	1.4375	0.392317	0.523562	4	FALSE	TRUE	TRUE	25	411	6.08273	Tmito	MDS023|MRP-S28|MRPS28|P82673	ENSG00000061794
MRPL53	39S ribosomal protein L53, mitochondrial OS=Homo sapiens GN=MRPL53 PE=1 SV=1	1	1	4	58000000		59000000	67000000	74000000		29000000	50000000	1.72414	0.785875	0.604099	0.218892	37000000	70500000	1.27586	2.43103	0.351472	1.28157	3	FALSE	FALSE	FALSE	3	411	0.729927	Tmito	L53MT|Q96EL3	ENSG00000204822
MDH2	Malate dehydrogenase, mitochondrial OS=Homo sapiens GN=MDH2 PE=1 SV=3	15	15	285	1300000000	1900000000	1300000000	1800000000	1000000000	1200000000	1600000000	1325000000	0.828125	-0.27208	0.521855	0.28245	1100000000	1400000000	0.6875	0.875	-0.540568	-0.192645	4	FALSE	TRUE	TRUE	103	411	25.0608	Tmito	M-MDH|MDH|MGC:3559|MOR1|P40926	ENSG00000146701
MRPS27	28S ribosomal protein S27, mitochondrial OS=Homo sapiens GN=MRPS27 PE=2 SV=1	8	8	37	39000000	50000000	93000000	94000000	77000000	67000000	44500000	82750000	1.85955	0.894954	0.0149128	1.82644	72000000	85500000	1.61798	1.92135	0.694192	0.942119	4	TRUE	TRUE	TRUE	31	411	7.54258	Tmito	MRP-S27|S27mt|Q92552	ENSG00000113048
CS	Citrate synthase, mitochondrial OS=Homo sapiens GN=CS PE=1 SV=2	12	13	110	440000000	340000000	340000000	470000000	310000000	360000000	390000000	370000000	0.948718	-0.0759489	0.773373	0.111611	335000000	390000000	0.858974	1	-0.219313	0	4	FALSE	TRUE	TRUE	90	411	21.8978	Tmito	O75390	ENSG00000062485
GRPEL1	GrpE protein homolog 1, mitochondrial OS=Homo sapiens GN=GRPEL1 PE=1 SV=2	8	8	65	140000000	150000000	270000000	280000000	160000000	210000000	145000000	230000000	1.58621	0.665581	0.0539056	1.26837	185000000	220000000	1.27586	1.51724	0.351472	0.601451	4	FALSE	TRUE	TRUE	79	411	19.2214	Tmito	HMGE|Q9HAV7	ENSG00000109519
DLAT	Dihydrolipoyllysine-residue acetyltransferase component of pyruvate dehydrogenase complex, mitochondrial OS=Homo sapiens GN=DLAT PE=1 SV=3	5	5	12	47000000	34000000	35000000	52000000	66000000	53000000	40500000	51500000	1.2716	0.346651	0.314741	0.502046	59500000	59000000	1.46914	1.45679	0.554968	0.542793	4	FALSE	TRUE	TRUE	38	411	9.24574	Tmito	DLTA|PDC-E2|PDCE2|P10515	ENSG00000150768
LRPPRC	Leucine-rich PPR motif-containing protein, mitochondrial OS=Homo sapiens GN=LRPPRC PE=1 SV=3	41	41	185	110000000	150000000	110000000	170000000	110000000	96000000	130000000	121500000	0.934615	-0.0975553	0.769024	0.11406	103000000	140000000	0.792308	1.07692	-0.335867	0.106915	4	FALSE	TRUE	TRUE	130	411	31.6302	Tmito	CLONE-23970|GP130|LRP130|LSFC|P42704	ENSG00000138095
DLST	Dihydrolipoyllysine-residue succinyltransferase component of 2-oxoglutarate dehydrogenase complex, mitochondrial OS=Homo sapiens GN=DLST PE=1 SV=4	2	2	4	47000000	32000000	44000000			40000000	39500000	21000000	0.531646	-0.911463	0.265076	0.576629	20000000	0	0.506329	0	-0.981853		2	FALSE	FALSE	FALSE	57	411	13.8686	Tmito	DLTS|P36957	ENSG00000119689
PDHX	Pyruvate dehydrogenase protein X component, mitochondrial OS=Homo sapiens GN=PDHX PE=1 SV=3	4	4	5	19000000	10000000		8500000	43000000		14500000	12875000	0.887931	-0.17148	0.891788	0.0497386	21500000	25750000	1.48276	1.77586	0.568284	0.82852	2	FALSE	TRUE	TRUE	12	411	2.91971	Tmito	DLDBP|E3BP|OPDX|PDX1|proX|O00330	ENSG00000110435
GFM1	Elongation factor G, mitochondrial OS=Homo sapiens GN=GFM1 PE=1 SV=2	6	6	13	57000000	19000000	29000000	40000000	40000000	28000000	38000000	34250000	0.901316	-0.149895	0.876317	0.0573386	34000000	40000000	0.894737	1.05263	-0.160465	0.0740006	4	FALSE	TRUE	TRUE	12	411	2.91971	Tmito	COXPD1|EFG|EFG1|EFGM|EGF1|GFM|hEFG1|Q96RP9	ENSG00000168827
NDUFS1	Isoform 2 of NADH-ubiquinone oxidoreductase 75 kDa subunit, mitochondrial OS=Homo sapiens GN=NDUFS1	2	2	3				21000000	20000000		0	10250000	100	6.64386	0.181879	0.740216	10000000	20500000	100	100	6.64386	6.64386	2	FALSE	FALSE	FALSE	19	411	4.62287	Tmito	CI-75Kd|CI-75k|PRO1304|P28331	ENSG00000023228
MRPL46	39S ribosomal protein L46, mitochondrial OS=Homo sapiens GN=MRPL46 PE=1 SV=1	5	5	19	48000000	38000000	39000000	43000000	36000000	53000000	43000000	42750000	0.994186	-0.00841224	0.971335	0.012631	44500000	39500000	1.03488	0.918605	0.0494687	-0.122484	4	FALSE	TRUE	TRUE	18	411	4.37956	Tmito	C15orf4|LIECG2|P2ECSL|Q9H2W6	ENSG00000259494
ATP5E	ATP synthase subunit epsilon, mitochondrial OS=Homo sapiens GN=ATP5E PE=1 SV=2	1	1	1			43000000				0	10750000	100	6.64386	0.391002	0.407821	0	0	0	0			1	FALSE	FALSE	FALSE	1	411	0.243309	Tmito	ATPE|MC5DN3|P56381	ENSG00000124172
SLC25A3	Isoform B of Phosphate carrier protein, mitochondrial OS=Homo sapiens GN=SLC25A3	4	4	16	68000000	100000000	140000000	110000000	63000000	90000000	84000000	100750000	1.1994	0.262319	0.515059	0.288143	76500000	86500000	0.910714	1.02976	-0.13493	0.0423108	4	FALSE	TRUE	TRUE	130	411	31.6302	Tmito	PHC|PTP|Q00325	ENSG00000075415
MRPS23	28S ribosomal protein S23, mitochondrial OS=Homo sapiens GN=MRPS23 PE=1 SV=2	1	1	2			17000000		25000000		0	10500000	100	6.64386	0.193032	0.714371	12500000	12500000	100	100	6.64386	6.64386	2	FALSE	FALSE	FALSE	21	411	5.10949	Tmito	HSPC329|MRP-S23|Q9Y3D9	ENSG00000181610
FH	Fumarate hydratase, mitochondrial OS=Homo sapiens GN=FH PE=1 SV=3	5	5	30	86000000	55000000	57000000	73000000	66000000	66000000	70500000	65500000	0.929078	-0.106128	0.80194	0.0958581	66000000	69500000	0.93617	0.985816	-0.0951572	-0.0206103	4	FALSE	TRUE	TRUE	24	411	5.83942	Tmito	HLRCC|LRCC|MCL|MCUL1|P07954	ENSG00000091483
PMPCA	Mitochondrial-processing peptidase subunit alpha OS=Homo sapiens GN=PMPCA PE=1 SV=2	8	8	31	64000000	110000000	86000000	190000000	110000000	54000000	87000000	110000000	1.26437	0.338416	0.571321	0.24312	82000000	150000000	0.942529	1.72414	-0.0853915	0.785875	4	FALSE	TRUE	TRUE	19	411	4.62287	Tmito	Alpha-MPP|INPP5E|P-55|Q10713	ENSG00000165688
ATP5B	ATP synthase subunit beta, mitochondrial OS=Homo sapiens GN=ATP5B PE=1 SV=3	22	22	186	360000000	270000000	390000000	450000000	400000000	370000000	315000000	402500000	1.27778	0.353637	0.273796	0.562574	385000000	425000000	1.22222	1.34921	0.289507	0.432111	4	FALSE	TRUE	TRUE	211	411	51.3382	Tmito	ATPMB|ATPSB|HEL-S-271|P06576	ENSG00000110955
SUCLA2	Succinyl-CoA ligase [ADP-forming] subunit beta, mitochondrial OS=Homo sapiens GN=SUCLA2 PE=1 SV=3	6	6	29	88000000	130000000	93000000	130000000	93000000	95000000	109000000	102750000	0.942661	-0.0851897	0.819692	0.0863491	94000000	111500000	0.862385	1.02294	-0.213595	0.0327156	4	FALSE	TRUE	TRUE	10	411	2.43309	Tmito	A-BETA|MTDPS5|SCS-betaA|Q9P2R7	ENSG00000136143
COQ3	Hexaprenyldihydroxybenzoate methyltransferase, mitochondrial OS=Homo sapiens GN=COQ3 PE=1 SV=3	3	3	10		12000000	23000000	40000000	20000000	26000000	6000000	27250000	4.54167	2.18322	0.0949915	1.02232	23000000	30000000	3.83333	5	1.9386	2.32193	4	FALSE	TRUE	TRUE	0	411	0	Tmito	DHHBMT|DHHBMTASE|UG0215E05|bA9819.1|Q9NZJ6	ENSG00000132423
IARS2	Isoleucine--tRNA ligase, mitochondrial OS=Homo sapiens GN=IARS2 PE=1 SV=2	13	13	45	75000000	77000000	72000000	68000000	60000000	52000000	76000000	63000000	0.828947	-0.270648	0.0579588	1.23688	56000000	64000000	0.736842	0.842105	-0.440573	-0.247928	4	FALSE	TRUE	TRUE	18	411	4.37956	Tmito	ILERS|Q9NSE4	ENSG00000067704
IDH3A	Isocitrate dehydrogenase [NAD] subunit alpha, mitochondrial OS=Homo sapiens GN=IDH3A PE=1 SV=1	7	7	46	170000000	120000000	180000000	280000000	130000000	160000000	145000000	187500000	1.2931	0.370838	0.362785	0.440351	145000000	205000000	1	1.41379	0	0.499571	4	FALSE	TRUE	TRUE	32	411	7.78589	Tmito	P50213	ENSG00000166411
COX11	Cytochrome c oxidase assembly protein COX11, mitochondrial OS=Homo sapiens GN=COX11 PE=1 SV=3	1	1	1							0	0	100	6.64386			0	0	0	0			0		FALSE	FALSE	0	411	0	Tmito	COX11P|Q9Y6N1	ENSG00000166260
UQCRH	Cytochrome b-c1 complex subunit 6, mitochondrial OS=Homo sapiens GN=UQCRH PE=1 SV=2	1	1	7		100000000	51000000	120000000	55000000		50000000	56500000	1.13	0.176323	0.920705	0.0358796	27500000	87500000	0.55	1.75	-0.862496	0.807355	3	FALSE	FALSE	TRUE	1	411	0.243309	Tmito	QCR6|UQCR8|P07919	ENSG00000173660
HIGD2A	HIG1 domain family member 2A, mitochondrial OS=Homo sapiens GN=HIGD2A PE=1 SV=1	1	1	1						36000000	0	9000000	100	6.64386	0.391002	0.407821	18000000	0	100	0	6.64386		1	FALSE	FALSE	FALSE	1	411	0.243309	Tmito	RCF1b|Q9BW72	ENSG00000146066
ATP5O	ATP synthase subunit O, mitochondrial OS=Homo sapiens GN=ATP5O PE=1 SV=1	5	5	18	63000000	45000000	48000000	52000000	44000000	22000000	54000000	41500000	0.768519	-0.379848	0.372464	0.428916	33000000	48000000	0.611111	0.888889	-0.710493	-0.169925	4	FALSE	TRUE	TRUE	51	411	12.4088	Tmito	ATPO|OSCP|P48047	ENSG00000241837
ECHS1	Enoyl-CoA hydratase, mitochondrial OS=Homo sapiens GN=ECHS1 PE=1 SV=4	10	10	107	380000000	450000000	420000000	470000000	300000000	230000000	415000000	355000000	0.855422	-0.225292	0.409031	0.388244	265000000	385000000	0.638554	0.927711	-0.647119	-0.108253	4	FALSE	TRUE	TRUE	40	411	9.73236	Tmito	SCEH|P30084	ENSG00000127884
HADHA	Trifunctional enzyme subunit alpha, mitochondrial OS=Homo sapiens GN=HADHA PE=1 SV=2	20	20	129	140000000	130000000	180000000	240000000	150000000	110000000	135000000	170000000	1.25926	0.332575	0.292773	0.533469	130000000	195000000	0.962963	1.44444	-0.0544478	0.530515	4	FALSE	TRUE	TRUE	72	411	17.5182	Tmito	ECHA|GBP|HADH|LCEH|LCHAD|MTPA|TP-ALPHA|P40939	ENSG00000084754
ETFA	Electron transfer flavoprotein subunit alpha, mitochondrial OS=Homo sapiens GN=ETFA PE=1 SV=1	11	11	82	130000000	220000000	210000000	290000000	100000000	98000000	175000000	174500000	0.997143	-0.00412789	0.994308	0.00247891	99000000	195000000	0.565714	1.11429	-0.821854	0.156119	4	FALSE	TRUE	TRUE	47	411	11.4355	Tmito	EMA|GA2|MADD|P13804	ENSG00000140374
NDUFS7	NADH dehydrogenase [ubiquinone] iron-sulfur protein 7, mitochondrial OS=Homo sapiens GN=NDUFS7 PE=2 SV=1	1	1	1			16000000				0	4000000	100	6.64386	0.391002	0.407821	0	0	0	0			1	FALSE	FALSE	FALSE	17	411	4.13625	Tmito	CI-20|CI-20KD|MY017|PSST|O75251	ENSG00000115286
CPT2	Carnitine O-palmitoyltransferase 2, mitochondrial OS=Homo sapiens GN=CPT2 PE=1 SV=2	12	12	33	31000000	46000000	36000000	50000000	44000000	49000000	38500000	44750000	1.16234	0.217029	0.55259	0.257597	46500000	47000000	1.20779	1.22078	0.272372	0.287802	4	FALSE	TRUE	TRUE	7	411	1.70316	Tmito	CPT1|CPTASE|IIAE4|P23786	ENSG00000157184
IDH3B	Isocitrate dehydrogenase [NAD] subunit beta, mitochondrial OS=Homo sapiens GN=IDH3B PE=1 SV=2	5	5	31	92000000	68000000	100000000	100000000	72000000	79000000	80000000	87750000	1.09688	0.133399	0.641585	0.192746	75500000	86000000	0.94375	1.075	-0.0835234	0.104337	4	FALSE	TRUE	TRUE	17	411	4.13625	Tmito	H-IDHB|RP46|O43837	ENSG00000101365
LARS2	Probable leucine--tRNA ligase, mitochondrial OS=Homo sapiens GN=LARS2 PE=1 SV=2	7	7	12			31000000	48000000	19000000	26000000	0	31000000	100	6.64386	0.0152426	1.81694	22500000	33500000	100	100	6.64386	6.64386	4	TRUE	TRUE	TRUE	5	411	1.21655	Tmito	LEURS|PRLTS4|Q15031	ENSG00000011376
LETM1	LETM1 and EF-hand domain-containing protein 1, mitochondrial OS=Homo sapiens GN=LETM1 PE=1 SV=1	8	8	24	36000000	19000000	55000000	87000000	54000000	58000000	27500000	63500000	2.30909	1.20732	0.0588667	1.23013	56000000	70500000	2.03636	2.56364	1.026	1.35819	4	FALSE	TRUE	TRUE	18	411	4.37956	Tmito	O95202	ENSG00000168924
ATP5I	ATP synthase subunit e, mitochondrial OS=Homo sapiens GN=ATP5I PE=1 SV=2	2	2	3			79000000		48000000	57000000	0	46000000	100	6.64386	0.0700713	1.15446	52500000	24000000	100	100	6.64386	6.64386	3	FALSE	FALSE	FALSE	6	411	1.45985	Tmito	ATP5K|P56385	ENSG00000169020
OPA1	Dynamin-like 120 kDa protein, mitochondrial OS=Homo sapiens GN=OPA1 PE=3 SV=1	6	6	23	13000000	26000000	28000000	59000000	38000000	19000000	19500000	36000000	1.84615	0.884523	0.205239	0.687739	28500000	48500000	1.46154	2.48718	0.547488	1.31451	4	FALSE	TRUE	TRUE	13	411	3.16302	Tmito	MGM1|NPG|NTG|largeG|O60313	ENSG00000198836
SUCLG1	Succinyl-CoA ligase [ADP/GDP-forming] subunit alpha, mitochondrial OS=Homo sapiens GN=SUCLG1 PE=1 SV=4	3	3	25	120000000	76000000	130000000	150000000	100000000	110000000	98000000	122500000	1.25	0.321928	0.450361	0.34644	105000000	125000000	1.07143	1.27551	0.0995357	0.351074	4	FALSE	TRUE	TRUE	20	411	4.86618	Tpossible_mito	GALPHA|MTDPS9|SUCLA1|P53597	ENSG00000163541
NDUFV2	NADH dehydrogenase [ubiquinone] flavoprotein 2, mitochondrial OS=Homo sapiens GN=NDUFV2 PE=4 SV=1	1	1	3			18000000	20000000	9000000		0	11750000	100	6.64386	0.0831958	1.0799	4500000	14500000	100	100	6.64386	6.64386	3	FALSE	FALSE	FALSE	3	411	0.729927	Tmito	CI-24k|P19404	ENSG00000178127
COQ6	Ubiquinone biosynthesis monooxygenase COQ6 OS=Homo sapiens GN=COQ6 PE=1 SV=2	2	2	3				17000000	220000000		0	59250000	100	6.64386	0.350686	0.455082	110000000	118500000	100	100	6.64386	6.64386	2	FALSE	FALSE	FALSE	0	411	0	Tmito	CGI10|COQ10D6|Q9Y2Z9	ENSG00000119723
MRPL43	Isoform 6 of 39S ribosomal protein L43, mitochondrial OS=Homo sapiens GN=MRPL43	2	2	5			22000000	23000000	19000000	35000000	0	24750000	100	6.64386	0.00591414	2.22811	27000000	21000000	100	100	6.64386	6.64386	4	TRUE	FALSE	TRUE	8	411	1.94647	Tmito	bMRP36a|Q8N983	ENSG00000055950
ATP5J	Isoform 2 of ATP synthase-coupling factor 6, mitochondrial OS=Homo sapiens GN=ATP5J	2	2	12	50000000	40000000	82000000	86000000	80000000	81000000	45000000	82250000	1.82778	0.870091	0.0685556	1.16396	80500000	83000000	1.78889	1.84444	0.839064	0.883186	4	FALSE	FALSE	TRUE	10	411	2.43309	Tmito	ATP5|ATP5A|ATPM|CF6|F6|P18859	ENSG00000154723
LONP1	Lon protease homolog, mitochondrial OS=Homo sapiens GN=LONP1 PE=2 SV=1	16	16	67	78000000	92000000	110000000	120000000	74000000	72000000	85000000	94000000	1.10588	0.145198	0.55943	0.252254	73000000	97000000	0.858824	1.14118	-0.219566	0.190522	4	FALSE	TRUE	TRUE	73	411	17.7616	Tmito	LON|LONP|LonHS|PIM1|PRSS15|hLON|P36776	ENSG00000196365
DLD	Dihydrolipoyl dehydrogenase, mitochondrial OS=Homo sapiens GN=DLD PE=1 SV=2	11	11	115	200000000	170000000	230000000	330000000	170000000	190000000	185000000	230000000	1.24324	0.314109	0.311842	0.506066	180000000	250000000	0.972973	1.35135	-0.0395284	0.434403	4	FALSE	TRUE	TRUE	84	411	20.438	Tmito	DLDD|DLDH|E3|GCSL|LAD|PHE3|P09622	ENSG00000091140
AIFM1	Apoptosis-inducing factor 1, mitochondrial OS=Homo sapiens GN=AIFM1 PE=1 SV=1	15	15	92	95000000	100000000	130000000	170000000	120000000	110000000	97500000	132500000	1.35897	0.442518	0.0740498	1.13048	115000000	145000000	1.17949	1.48718	0.23816	0.572579	4	FALSE	TRUE	TRUE	101	411	24.5742	Tmito	AIF|CMT2D|CMTX4|COWCK|COXPD6|NADMR|NAMSD|PDCD8|O95831	ENSG00000156709
MRPL10	Isoform 2 of 39S ribosomal protein L10, mitochondrial OS=Homo sapiens GN=MRPL10	3	3	5			29000000	38000000	30000000		0	24250000	100	6.64386	0.0619454	1.20799	15000000	34000000	100	100	6.64386	6.64386	3	FALSE	TRUE	TRUE	8	411	1.94647	Tmito	L10MT|MRP-L10|MRP-L8|MRPL8|RPML8|Q7Z7H8	ENSG00000159111
NDUFS8	NADH dehydrogenase [ubiquinone] iron-sulfur protein 8, mitochondrial OS=Homo sapiens GN=NDUFS8 PE=1 SV=1	1	1	1				24000000			0	6000000	100	6.64386	0.391002	0.407821	0	12000000	0	100		6.64386	1	FALSE	FALSE	FALSE	7	411	1.70316	Tmito	CI-23k|CI23KD|TYKY|O00217	ENSG00000110717
ACADM	Acyl-Coenzyme A dehydrogenase, C-4 to C-12 straight chain, isoform CRA_a OS=Homo sapiens GN=ACADM PE=3 SV=1	9	9	47	120000000	76000000	120000000	130000000	93000000	95000000	98000000	109500000	1.11735	0.160077	0.695489	0.15771	94000000	111500000	0.959184	1.13776	-0.060121	0.18619	4	FALSE	TRUE	TRUE	22	411	5.3528	Tmito	ACAD1|MCAD|MCADH|P11310	ENSG00000117054
IMMT	Mitochondrial inner membrane protein OS=Homo sapiens GN=IMMT PE=1 SV=1	2	2	4			7500000		13000000	15000000	0	8875000	100	6.64386	0.0773785	1.11138	14000000	6500000	100	100	6.64386	6.64386	3	FALSE	FALSE	FALSE	44	411	10.7056	Tmito	HMP|MINOS2|P87|P87/89|P89|PIG52|Q16891	ENSG00000132305
TIMM9	Mitochondrial import inner membrane translocase subunit Tim9 OS=Homo sapiens GN=TIMM9 PE=1 SV=1	2	2	4			23000000	22000000	25000000		0	17500000	100	6.64386	0.0584565	1.23317	12500000	23500000	100	100	6.64386	6.64386	3	FALSE	FALSE	FALSE	0	411	0	Tmito	TIM9|TIM9A|Q9Y5J7	ENSG00000100575
SLC25A4	ADP/ATP translocase 1 OS=Homo sapiens GN=SLC25A4 PE=1 SV=4	1	7	28	27000000						13500000	0	0		0.5	0.30103	0	0	0	0			0	FALSE	TRUE	TRUE	195	411	47.4453	Tmito	1|AAC1|ANT|ANT 1|ANT1|MTDPS12|PEO2|PEO3|T1|P12235	ENSG00000151729
NDUFS2	NADH dehydrogenase [ubiquinone] iron-sulfur protein 2, mitochondrial OS=Homo sapiens GN=NDUFS2 PE=1 SV=2	2	2	3		19000000			9700000	14000000	9500000	5925000	0.623684	-0.681112	0.77332	0.111641	11850000	4850000	1.24737	0.510526	0.318888	-0.969943	2	FALSE	FALSE	FALSE	14	411	3.40633	Tmito	CI-49|O75306	ENSG00000158864
NDUFV1	NADH dehydrogenase [ubiquinone] flavoprotein 1, mitochondrial OS=Homo sapiens GN=NDUFV1 PE=1 SV=4	1	1	1			16000000				0	4000000	100	6.64386	0.391002	0.407821	0	0	0	0			1	FALSE	FALSE	FALSE	6	411	1.45985	Tmito	CI-51K|CI51KD|UQOR1|P49821	ENSG00000167792
ACO2	Aconitate hydratase, mitochondrial OS=Homo sapiens GN=ACO2 PE=2 SV=1	27	27	180	240000000	150000000	220000000	260000000	180000000	200000000	195000000	215000000	1.10256	0.140863	0.735939	0.133158	190000000	220000000	0.974359	1.12821	-0.0374747	0.174029	4	FALSE	TRUE	TRUE	27	411	6.56934	Tmito	ACONM|ICRD|Q99798	ENSG00000100412
SUPV3L1	ATP-dependent RNA helicase SUPV3L1, mitochondrial OS=Homo sapiens GN=SUPV3L1 PE=1 SV=1	3	3	5			25000000	24000000	26000000	19000000	0	23500000	100	6.64386	0.000628482	3.20171	22500000	25000000	100	100	6.64386	6.64386	4	TRUE	TRUE	TRUE	6	411	1.45985	Tmito	SUV3|Q8IYB8	ENSG00000156502
FECH	Isoform 2 of Ferrochelatase, mitochondrial OS=Homo sapiens GN=FECH	4	4	16	27000000	28000000	37000000	41000000	37000000	46000000	27500000	40250000	1.46364	0.549557	0.00769442	2.11382	41500000	39000000	1.50909	1.41818	0.59368	0.504043	4	TRUE	TRUE	TRUE	5	411	1.21655	Tmito	EPP|FCE|P22830	ENSG00000066926
PHB	Prohibitin OS=Homo sapiens GN=PHB PE=1 SV=1	12	12	76	140000000	100000000	81000000	160000000	120000000	130000000	120000000	122750000	1.02292	0.0326886	0.923342	0.0346376	125000000	140000000	1.04167	1.16667	0.0588937	0.222392	4	FALSE	TRUE	TRUE	85	411	20.6813	Tmito	HEL-215|HEL-S-54e|PHB1|P35232	ENSG00000167085
HIBCH	3-hydroxyisobutyryl-CoA hydrolase, mitochondrial OS=Homo sapiens GN=HIBCH PE=1 SV=2	6	6	17	40000000	33000000	35000000	39000000	25000000	39000000	36500000	34500000	0.945205	-0.0813001	0.707257	0.150422	32000000	32000000	0.876712	0.876712	-0.189825	-0.189825	4	FALSE	TRUE	TRUE	7	411	1.70316	Tmito	HIBYLCOAH|Q6NVY1	ENSG00000198130
HSPA9	Stress-70 protein, mitochondrial OS=Homo sapiens GN=HSPA9 PE=1 SV=2	30	30	632	1400000000	1400000000	1800000000	2400000000	1600000000	1600000000	1400000000	1850000000	1.32143	0.402098	0.0978634	1.00938	1600000000	2000000000	1.14286	1.42857	0.192645	0.514573	4	FALSE	TRUE	TRUE	307	411	74.6959	Tmito	CSA|GRP-75|GRP75|HEL-S-124m|HSPA9B|MOT|MOT2|MTHSP75|PBP74|P38646	ENSG00000113013
PRDX3	Thioredoxin-dependent peroxide reductase, mitochondrial OS=Homo sapiens GN=PRDX3 PE=1 SV=3	9	9	171	1400000000	1100000000	1500000000	2200000000	1600000000	1500000000	1250000000	1700000000	1.36	0.443607	0.130522	0.884315	1550000000	1900000000	1.24	1.52	0.31034	0.604071	4	FALSE	TRUE	TRUE	137	411	33.3333	Tmito	AOP-1|AOP1|HBC189|MER5|PRO1748|SP-22|prx-III|P30048	ENSG00000165672
GUF1	Translation factor GUF1, mitochondrial OS=Homo sapiens GN=GUF1 PE=1 SV=1	1	1	2			14000000	11000000			0	6250000	100	6.64386	0.186241	0.729925	0	5500000	0	100		6.64386	2	FALSE	FALSE	FALSE	2	411	0.486618	Tmito	EF-4|Q8N442	ENSG00000151806
TIMM13	Mitochondrial import inner membrane translocase subunit Tim13 OS=Homo sapiens GN=TIMM13 PE=1 SV=1	5	5	35	170000000	160000000	130000000	200000000	230000000	170000000	165000000	182500000	1.10606	0.14543	0.478336	0.320267	200000000	215000000	1.21212	1.30303	0.277534	0.381871	4	FALSE	TRUE	TRUE	65	411	15.8151	Tmito	TIM13|TIM13B|TIMM13A|TIMM13B|ppv1|Q9Y5L4	ENSG00000099800
LYRM4	LYR motif-containing protein 4 OS=Homo sapiens GN=LYRM4 PE=1 SV=1	7	7	114		25000000	6100000000	8500000000	7300000000	7100000000	12500000	7250000000	100	6.64386	0.000679194	3.16801	7200000000	7900000000	576	632	9.16993	9.30378	4	TRUE	TRUE	TRUE	2	411	0.486618	Tmito	C6orf149|CGI-203|COXPD19|ISD11|RP11-428J1.4|Q9HD34	ENSG00000214113
MRPL40	39S ribosomal protein L40, mitochondrial OS=Homo sapiens GN=MRPL40 PE=1 SV=1	2	2	6	31000000	38000000		35000000	26000000	29000000	34500000	22500000	0.652174	-0.616671	0.232499	0.633579	27500000	30500000	0.797101	0.884058	-0.327165	-0.177787	3	FALSE	FALSE	TRUE	5	411	1.21655	Tmito	MRP-L22|MRPL22|NLVCF|URIM|Q9NQ50	ENSG00000185608
IDH3G	Isocitrate dehydrogenase [NAD] subunit gamma, mitochondrial OS=Homo sapiens GN=IDH3G PE=1 SV=1	4	4	18	58000000	84000000	68000000	93000000	100000000	59000000	71000000	80000000	1.12676	0.172181	0.63106	0.199929	79500000	96500000	1.11972	1.35915	0.163136	0.44271	4	FALSE	TRUE	TRUE	9	411	2.18978	Tmito	H-IDHG|P51553	ENSG00000067829
C21orf33	ES1 protein homolog, mitochondrial OS=Homo sapiens GN=C21orf33 PE=1 SV=3	4	4	22	130000000	110000000	76000000	140000000	120000000	160000000	120000000	124000000	1.03333	0.0473057	0.855226	0.0679193	140000000	130000000	1.16667	1.08333	0.222392	0.115477	4	FALSE	TRUE	TRUE	17	411	4.13625	Tmito	ES1|GT335|HES1|KNPH|KNPI|P30042	ENSG00000160221
TXN2	Thioredoxin, mitochondrial OS=Homo sapiens GN=TXN2 PE=1 SV=2	4	4	19	190000000	120000000	130000000	170000000	110000000	110000000	155000000	130000000	0.83871	-0.253757	0.603132	0.219588	110000000	140000000	0.709677	0.903226	-0.494765	-0.146841	4	FALSE	TRUE	TRUE	0	411	0	Tmito	MT-TRX|MTRX|TRX2|Q99757	ENSG00000100348
MTCH2	Mitochondrial carrier homolog 2 OS=Homo sapiens GN=MTCH2 PE=1 SV=1	1	1	1		17000000					8500000	0	0		0.5	0.30103	0	0	0	0			0	FALSE	FALSE	FALSE	26	411	6.32603	Tmito	MIMP|SLC25A50|Q9Y6C9	ENSG00000109919
NDUFA6	NADH dehydrogenase [ubiquinone] 1 alpha subcomplex subunit 6 OS=Homo sapiens GN=NDUFA6 PE=1 SV=3	3	3	6	42000000	45000000		32000000	38000000		43500000	17500000	0.402299	-1.31366	0.0822166	1.08504	19000000	35000000	0.436782	0.804598	-1.19502	-0.31366	2	FALSE	TRUE	TRUE	3	411	0.729927	Tmito	B14|CI-B14|LYRM6|NADHB14|P56556	ENSG00000184983
MRPL1	39S ribosomal protein L1, mitochondrial OS=Homo sapiens GN=MRPL1 PE=1 SV=2	2	2	6			22000000	29000000	29000000	30000000	0	27500000	100	6.64386	0.000658958	3.18114	29500000	29000000	100	100	6.64386	6.64386	4	TRUE	FALSE	TRUE	13	411	3.16302	Tmito	BM022|L1MT|MRP-L1|Q9BYD6	ENSG00000169288
TIMM44	Mitochondrial import inner membrane translocase subunit TIM44 OS=Homo sapiens GN=TIMM44 PE=1 SV=2	13	13	76	97000000	120000000	140000000	180000000	95000000	94000000	108500000	127250000	1.17281	0.229971	0.47124	0.326758	94500000	137500000	0.870968	1.26728	-0.199309	0.341737	4	FALSE	TRUE	TRUE	40	411	9.73236	Tmito	TIM44|O43615	ENSG00000104980
COX17	Cytochrome c oxidase copper chaperone OS=Homo sapiens GN=COX17 PE=4 SV=1	1	1	17	140000000	88000000	150000000	170000000	88000000	120000000	114000000	132000000	1.15789	0.211504	0.625529	0.203753	104000000	129000000	0.912281	1.13158	-0.13245	0.178337	4	FALSE	FALSE	TRUE	27	411	6.56934	Tmito	Q14061	ENSG00000138495
SOD2	Superoxide dismutase [Mn], mitochondrial OS=Homo sapiens GN=SOD2 PE=1 SV=2	5	5	57	160000000	130000000	160000000	220000000	130000000	150000000	145000000	165000000	1.13793	0.186413	0.463606	0.333851	140000000	175000000	0.965517	1.2069	-0.0506261	0.271302	4	FALSE	TRUE	TRUE	2	411	0.486618	Tmito	IPOB|MNSOD|MVCD6|P04179	ENSG00000112096
COX6B1	Cytochrome c oxidase subunit 6B1 OS=Homo sapiens GN=COX6B1 PE=1 SV=2	3	3	11	49000000	37000000	45000000	23000000	52000000	50000000	43000000	42500000	0.988372	-0.0168738	0.958733	0.0183022	51000000	37500000	1.18605	0.872093	0.246161	-0.197446	4	FALSE	TRUE	TRUE	9	411	2.18978	Tmito	COX6B|COXG|COXVIb1|P14854	ENSG00000126267
VDAC1	Voltage-dependent anion-selective channel protein 1 OS=Homo sapiens GN=VDAC1 PE=1 SV=2	9	10	49	95000000	110000000	74000000	110000000	130000000	140000000	102500000	113500000	1.10732	0.147068	0.539103	0.268328	135000000	120000000	1.31707	1.17073	0.397335	0.22741	4	FALSE	TRUE	TRUE	58	411	14.1119	Tmito	PORIN|VDAC-1|P21796	ENSG00000073905
CLPP	ATP-dependent Clp protease proteolytic subunit, mitochondrial OS=Homo sapiens GN=CLPP PE=1 SV=1	1	1	3			49000000			51000000	0	25000000	100	6.64386	0.181817	0.740365	25500000	0	100	0	6.64386		2	FALSE	FALSE	FALSE	23	411	5.59611	Tmito	PRLTS3|Q16740	ENSG00000125656
HADH	Isoform 2 of Hydroxyacyl-coenzyme A dehydrogenase, mitochondrial OS=Homo sapiens GN=HADH	7	7	25	54000000	73000000	83000000	89000000	100000000	46000000	63500000	79500000	1.25197	0.324198	0.354775	0.450047	73000000	94500000	1.14961	1.48819	0.20114	0.573558	4	FALSE	TRUE	TRUE	27	411	6.56934	Tmito	HAD|HADH1|HADHSC|HCDH|HHF4|MSCHAD|SCHAD|Q16836	ENSG00000138796
ACAT1	Acetyl-CoA acetyltransferase, mitochondrial OS=Homo sapiens GN=ACAT1 PE=1 SV=1	12	12	82	220000000	240000000	270000000	330000000	160000000	170000000	230000000	232500000	1.01087	0.0155969	0.956038	0.019525	165000000	245000000	0.717391	1.06522	-0.479168	0.0911479	4	FALSE	TRUE	TRUE	63	411	15.3285	Tmito	ACAT|MAT|T2|THIL|P24752	ENSG00000075239
MALSU1	Mitochondrial assembly of ribosomal large subunit protein 1 OS=Homo sapiens GN=MALSU1 PE=1 SV=1	1	1	6		23000000	29000000	28000000	22000000	4000000	11500000	20750000	1.80435	0.851477	0.565734	0.247388	13000000	25000000	1.13043	2.17391	0.176878	1.12029	4	FALSE	FALSE	TRUE	1	411	0.243309	Tmito	C7orf30|mtRsfA|Q96EH3	ENSG00000156928
CLPX	ATP-dependent Clp protease ATP-binding subunit clpX-like, mitochondrial OS=Homo sapiens GN=CLPX PE=1 SV=2	9	9	21	29000000	19000000	44000000	41000000	49000000	23000000	24000000	39250000	1.63542	0.709658	0.126839	0.896747	36000000	45000000	1.5	1.875	0.584963	0.906891	4	FALSE	TRUE	TRUE	23	411	5.59611	Tmito	O76031	ENSG00000166855
C1QBP	Complement component 1 Q subcomponent-binding protein, mitochondrial OS=Homo sapiens GN=C1QBP PE=1 SV=1	9	9	334	1900000000	1700000000	2900000000	3600000000	3200000000	2800000000	1800000000	3125000000	1.73611	0.795859	0.00299601	2.52346	3000000000	3400000000	1.66667	1.88889	0.736966	0.917538	4	TRUE	TRUE	TRUE	223	411	54.2579	Tmito	GC1QBP|HABP1|SF2p32|gC1Q-R|gC1qR|p32|Q07021	ENSG00000108561
PITRM1	Isoform 2 of Presequence protease, mitochondrial OS=Homo sapiens GN=PITRM1	15	15	60	95000000	97000000	85000000	100000000	55000000	81000000	96000000	80250000	0.835938	-0.258533	0.190787	0.719452	68000000	77500000	0.708333	0.807292	-0.4975	-0.308838	4	FALSE	TRUE	TRUE	11	411	2.6764	Tmito	MP1|PreP|Q5JRX3	ENSG00000107959
MECR	Trans-2-enoyl-CoA reductase, mitochondrial OS=Homo sapiens GN=MECR PE=1 SV=2	2	2	7			30000000	36000000	21000000		0	21750000	100	6.64386	0.0701018	1.15427	10500000	28500000	100	100	6.64386	6.64386	3	FALSE	FALSE	TRUE	1	411	0.243309	Tmito	CGI-63|FASN2B|NRBF1|Q9BV79	ENSG00000116353
MRPL44	39S ribosomal protein L44, mitochondrial OS=Homo sapiens GN=MRPL44 PE=1 SV=1	1	1	4		44000000	71000000	100000000	26000000		22000000	49250000	2.23864	1.16262	0.448183	0.348545	13000000	63000000	0.590909	2.86364	-0.758992	1.51785	3	FALSE	FALSE	FALSE	10	411	2.43309	Tmito	COXPD16|L44MT|MRP-L44|Q9H9J2	ENSG00000135900
HSDL2	Hydroxysteroid dehydrogenase-like protein 2 OS=Homo sapiens GN=HSDL2 PE=1 SV=1	9	9	38	62000000	88000000	130000000	150000000	54000000	61000000	75000000	98750000	1.31667	0.39689	0.436285	0.360229	57500000	102000000	0.766667	1.36	-0.383329	0.443607	4	FALSE	TRUE	TRUE	15	411	3.64964	Tmito	C9orf99|SDR13C1|Q6YN16	ENSG00000119471
MRPS14	28S ribosomal protein S14, mitochondrial OS=Homo sapiens GN=MRPS14 PE=1 SV=1	1	1	4			26000000	28000000	20000000	29000000	0	25750000	100	6.64386	0.00103474	2.98517	24500000	24000000	100	100	6.64386	6.64386	4	TRUE	FALSE	FALSE	16	411	3.89294	Tmito	DJ262D12.2|HSMRPS14|MRP-S14|S14mt|O60783	ENSG00000120333
ATPAF2	ATP synthase mitochondrial F1 complex assembly factor 2 OS=Homo sapiens GN=ATPAF2 PE=1 SV=1	4	4	9	34000000		21000000	22000000	19000000	19000000	17000000	20250000	1.19118	0.252387	0.879766	0.055633	19000000	20500000	1.11765	1.20588	0.160465	0.270089	4	FALSE	TRUE	TRUE	3	411	0.729927	Tmito	ATP12|ATP12p|MC5DN1|Q8N5M1	ENSG00000171953
COA6	Isoform 2 of Cytochrome c oxidase assembly factor 6 homolog OS=Homo sapiens GN=COA6	3	3	20	98000000	69000000	110000000	90000000	77000000	86000000	83500000	90750000	1.08683	0.120121	0.709138	0.149269	81500000	83500000	0.976048	1	-0.0349761	0	4	FALSE	TRUE	TRUE	11	411	2.6764	Tmito	C1orf31|Q5JTJ3	ENSG00000168275
POLRMT	DNA-directed RNA polymerase, mitochondrial OS=Homo sapiens GN=POLRMT PE=1 SV=2	1	1	1			12000000				0	3000000	100	6.64386	0.391002	0.407821	0	0	0	0			1	FALSE	FALSE	FALSE	30	411	7.29927	Tmito	APOLMT|MTRNAP|MTRPOL|h-mtRPOL|O00411	ENSG00000099821
ISCU	Iron-sulfur cluster assembly enzyme ISCU, mitochondrial OS=Homo sapiens GN=ISCU PE=1 SV=2	6	6	63			710000000	910000000	510000000	380000000	0	627500000	100	6.64386	0.0124095	1.90625	445000000	710000000	100	100	6.64386	6.64386	4	TRUE	TRUE	TRUE	0	411	0	Tmito	2310020H20Rik|HML|ISU2|NIFU|NIFUN|hnifU|Q9H1K1	ENSG00000136003
ATP5C1	ATP synthase subunit gamma, mitochondrial OS=Homo sapiens GN=ATP5C1 PE=1 SV=1	6	6	17	47000000	25000000	33000000	70000000	61000000	61000000	36000000	56250000	1.5625	0.643856	0.267234	0.573109	61000000	65500000	1.69444	1.81944	0.760812	0.863498	4	FALSE	TRUE	TRUE	68	411	16.545	Tmito	ATP5C|ATP5CL1|P36542	ENSG00000165629
NDUFAF4	NADH dehydrogenase [ubiquinone] 1 alpha subcomplex assembly factor 4 OS=Homo sapiens GN=NDUFAF4 PE=1 SV=1	2	2	3		40000000		56000000			20000000	14000000	0.7	-0.514573	0.82823	0.0818489	0	28000000	0	1.4		0.485427	1	FALSE	FALSE	FALSE	2	411	0.486618	Tmito	C6orf66|HRPAP20|My013|bA22L21.1|Q9P032	ENSG00000123545
SLC25A11	Mitochondrial 2-oxoglutarate/malate carrier protein OS=Homo sapiens GN=SLC25A11 PE=1 SV=3	2	2	13	76000000	49000000	60000000	39000000	37000000	87000000	62500000	55750000	0.892	-0.164884	0.734053	0.134273	62000000	38000000	0.992	0.608	-0.011588	-0.717857	4	FALSE	FALSE	TRUE	55	411	13.382	Tmito	OGC|SLC20A4|Q02978	ENSG00000108528
TIMM8B	Mitochondrial import inner membrane translocase subunit Tim8 B OS=Homo sapiens GN=TIMM8B PE=1 SV=1	2	2	13	58000000	41000000	50000000	68000000	52000000	44000000	49500000	53500000	1.08081	0.11211	0.730104	0.136615	48000000	60000000	0.969697	1.21212	-0.0443941	0.277534	4	FALSE	FALSE	TRUE	8	411	1.94647	Tmito	DDP2|TIM8B|Q9Y5J9	ENSG00000150779
MCAT	Malonyl-CoA-acyl carrier protein transacylase, mitochondrial OS=Homo sapiens GN=MCAT PE=1 SV=2	4	4	9		26000000	18000000	44000000	24000000	30000000	13000000	29000000	2.23077	1.15754	0.41661	0.38027	27000000	34000000	2.07692	2.61538	1.05445	1.38702	4	FALSE	TRUE	TRUE	0	411	0	Tmito	FASN2C|MCT|MT|NET62|fabD|Q8IVS2	ENSG00000100294
IBA57	Putative transferase CAF17, mitochondrial OS=Homo sapiens GN=IBA57 PE=1 SV=1	3	3	9	44000000	34000000	37000000	59000000	30000000	21000000	39000000	36750000	0.942308	-0.0857299	0.824906	0.0835954	25500000	44500000	0.653846	1.14103	-0.612977	0.190331	4	FALSE	TRUE	TRUE	7	411	1.70316	Tmito	C1orf69|MMDS3|Q5T440	ENSG00000181873
PHB2	Prohibitin-2 OS=Homo sapiens GN=PHB2 PE=2 SV=1	12	12	68	120000000	140000000	100000000	140000000	170000000	150000000	130000000	140000000	1.07692	0.106915	0.604799	0.218389	160000000	155000000	1.23077	1.19231	0.29956	0.253757	4	FALSE	TRUE	TRUE	95	411	23.1144	Tmito	BAP|BCAP37|Bap37|PNAS-141|REA|p22|Q99623	ENSG00000215021
DAP3	28S ribosomal protein S29, mitochondrial OS=Homo sapiens GN=DAP3 PE=1 SV=1	2	2	2				36000000		20000000	0	14000000	100	6.64386	0.206644	0.684777	10000000	18000000	100	100	6.64386	6.64386	2	FALSE	FALSE	FALSE	41	411	9.97567	Tmito	DAP-3|MRP-S29|MRPS29|bMRP-10|P51398	ENSG00000132676
CMC2	COX assembly mitochondrial protein 2 homolog OS=Homo sapiens GN=CMC2 PE=4 SV=1	1	1	1						84000000	0	21000000	100	6.64386	0.391002	0.407821	42000000	0	100	0	6.64386		1	FALSE	FALSE	FALSE	0	411	0	Tmito	2310061C15Rik|C16orf61|Q9NRP2	ENSG00000103121
MRPS17	28S ribosomal protein S17, mitochondrial OS=Homo sapiens GN=MRPS17 PE=3 SV=1	3	3	16	56000000	46000000	42000000	80000000	75000000	60000000	51000000	64250000	1.2598	0.333199	0.251897	0.598777	67500000	77500000	1.32353	1.51961	0.40439	0.603699	4	FALSE	TRUE	TRUE	11	411	2.6764	Tmito	HSPC011|MRP-S17|RPMS17|S17mt|Q9Y2R5	ENSG00000239789
NFS1	Cysteine desulfurase, mitochondrial OS=Homo sapiens GN=NFS1 PE=1 SV=3	21	21	249			1500000000	1600000000	1200000000	1500000000	0	1450000000	100	6.64386	0.000463884	3.33359	1350000000	1400000000	100	100	6.64386	6.64386	4	TRUE	TRUE	TRUE	10	411	2.43309	Tmito	IscS|NIFS|Q9Y697	ENSG00000244005
TACO1	Translational activator of cytochrome c oxidase 1 OS=Homo sapiens GN=TACO1 PE=1 SV=1	5	5	24	71000000	70000000	76000000	110000000	72000000	34000000	70500000	73000000	1.03546	0.0502732	0.882497	0.0542866	53000000	91000000	0.751773	1.29078	-0.411631	0.368243	4	FALSE	TRUE	TRUE	9	411	2.18978	Tmito	CCDC44|Q9BSH4	ENSG00000136463
MRPL11	39S ribosomal protein L11, mitochondrial OS=Homo sapiens GN=MRPL11 PE=1 SV=1	5	5	11		34000000	16000000	25000000	18000000	17000000	17000000	19000000	1.11765	0.160465	0.925563	0.0335941	17500000	21500000	1.02941	1.26471	0.0418202	0.338802	4	FALSE	TRUE	TRUE	11	411	2.6764	Tmito	L11MT|MRP-L11|Q9Y3B7	ENSG00000174547
COX4I1	Cytochrome c oxidase subunit 4 isoform 1, mitochondrial OS=Homo sapiens GN=COX4I1 PE=1 SV=1	4	4	21	65000000		85000000	89000000	57000000	81000000	32500000	78000000	2.4	1.26303	0.386713	0.412612	69000000	73000000	2.12308	2.24615	1.08616	1.16746	4	FALSE	TRUE	TRUE	18	411	4.37956	Tmito	COX4|COX4-1|COXIV|P13073	ENSG00000131143
NDUFS6	NADH dehydrogenase [ubiquinone] iron-sulfur protein 6, mitochondrial OS=Homo sapiens GN=NDUFS6 PE=2 SV=1	1	1	7	30000000	25000000	36000000	38000000	42000000	49000000	27500000	41250000	1.5	0.584963	0.0295743	1.52909	45500000	40000000	1.65455	1.45455	0.726435	0.540568	4	TRUE	FALSE	TRUE	0	411	0	Tmito	CI-13kA|CI-13kD-A|CI13KDA|O75380	ENSG00000145494
OXCT1	Succinyl-CoA:3-ketoacid coenzyme A transferase 1, mitochondrial OS=Homo sapiens GN=OXCT1 PE=1 SV=1	2	2	2		18000000					9000000	0	0		0.5	0.30103	0	0	0	0			0	FALSE	FALSE	FALSE	27	411	6.56934	Tmito	OXCT|SCOT|P55809	ENSG00000083720
COX5B	Cytochrome c oxidase subunit 5B, mitochondrial OS=Homo sapiens GN=COX5B PE=1 SV=2	4	4	11	34000000	41000000	26000000	26000000	41000000	38000000	37500000	32750000	0.873333	-0.195396	0.427744	0.368816	39500000	33500000	1.05333	0.893333	0.0749621	-0.16273	4	FALSE	TRUE	TRUE	10	411	2.43309	Tmito	COXVB|P10606	ENSG00000135940
MRPL33	Isoform 2 of 39S ribosomal protein L33, mitochondrial OS=Homo sapiens GN=MRPL33	1	1	1	310000000						155000000	0	0		0.5	0.30103	0	0	0	0			0	FALSE	FALSE	FALSE	0	411	0	Tmito	C2orf1|L33mt|MRP-L33|RPL33L|O75394	ENSG00000243147
NDUFA5	NADH dehydrogenase [ubiquinone] 1 alpha subcomplex subunit 5 OS=Homo sapiens GN=NDUFA5 PE=1 SV=3	3	3	6	20000000	13000000	25000000	32000000	7400000		16500000	16100000	0.975758	-0.0354053	0.963648	0.0160816	3700000	19700000	0.224242	1.19394	-2.15687	0.25573	3	FALSE	TRUE	TRUE	13	411	3.16302	Tmito	B13|CI-13KD-B|CI-13kB|NUFM|UQOR13|Q16718	ENSG00000128609
SUCLG2	Succinyl-CoA ligase [GDP-forming] subunit beta, mitochondrial OS=Homo sapiens GN=SUCLG2 PE=1 SV=2	8	8	31	74000000	57000000	50000000	66000000	53000000	42000000	65500000	52750000	0.805344	-0.312324	0.341135	0.467074	47500000	59500000	0.725191	0.908397	-0.463567	-0.138605	4	FALSE	TRUE	TRUE	10	411	2.43309	Tmito	GBETA|Q96I99	ENSG00000172340
FDX1	Adrenodoxin, mitochondrial OS=Homo sapiens GN=FDX1 PE=1 SV=1	1	1	4	33000000		37000000	48000000	32000000		16500000	29250000	1.77273	0.825971	0.584606	0.233136	16000000	40000000	0.969697	2.42424	-0.0443941	1.27753	3	FALSE	FALSE	FALSE	1	411	0.243309	Tmito	ADX|FDX|LOH11CR1D|P10109	ENSG00000137714
MRPS28	28S ribosomal protein S28, mitochondrial OS=Homo sapiens GN=MRPS28 PE=1 SV=1	5	5	11	27000000	41000000	30000000	53000000	38000000	47000000	34000000	42000000	1.23529	0.304855	0.447045	0.349649	42500000	45500000	1.25	1.33824	0.321928	0.420332	4	FALSE	TRUE	TRUE	21	411	5.10949	Tmito	MRP-S28|MRP-S35|MRPS35|Q9Y2Q9	ENSG00000147586
TIMM50	Isoform 2 of Mitochondrial import inner membrane translocase subunit TIM50 OS=Homo sapiens GN=TIMM50	3	3	13	15000000	30000000	33000000	32000000	28000000	28000000	22500000	30250000	1.34444	0.42701	0.48639	0.313015	28000000	30000000	1.24444	1.33333	0.315502	0.415037	4	FALSE	TRUE	TRUE	124	411	30.1703	Tmito	TIM50|TIM50L|Q3ZCQ8	ENSG00000105197
VDAC2	Isoform 1 of Voltage-dependent anion-selective channel protein 2 OS=Homo sapiens GN=VDAC2	7	7	26	91000000	99000000	48000000	56000000	58000000	100000000	95000000	65500000	0.689474	-0.536433	0.0828146	1.08189	79000000	57000000	0.831579	0.6	-0.266075	-0.736966	4	FALSE	TRUE	TRUE	58	411	14.1119	Tmito	POR|P45880	ENSG00000165637
ECH1	Delta(3,5)-Delta(2,4)-dienoyl-CoA isomerase, mitochondrial OS=Homo sapiens GN=ECH1 PE=1 SV=2	7	7	37	81000000	61000000	82000000	110000000	76000000	84000000	71000000	88000000	1.23944	0.309684	0.296073	0.528601	80000000	93000000	1.12676	1.30986	0.172181	0.389412	4	FALSE	TRUE	TRUE	65	411	15.8151	Tmito	HPXEL|Q13011	ENSG00000104823
ERAL1	GTPase Era, mitochondrial OS=Homo sapiens GN=ERAL1 PE=1 SV=2	2	2	2					6800000	30000000	0	9200000	100	6.64386	0.286633	0.542674	18400000	3400000	100	100	6.64386	6.64386	2	FALSE	FALSE	FALSE	10	411	2.43309	Tmito	ERA|ERAL1A|H-ERA|HERA-A|HERA-B|O75616	ENSG00000132591
MRPL28	39S ribosomal protein L28, mitochondrial OS=Homo sapiens GN=MRPL28 PE=1 SV=4	1	1	4			22000000		15000000	16000000	0	13250000	100	6.64386	0.0661013	1.17979	15500000	7500000	100	100	6.64386	6.64386	3	FALSE	FALSE	FALSE	12	411	2.91971	Tmito	MAAT1|p15|Q13084	ENSG00000086504
TSFM	Elongation factor Ts, mitochondrial OS=Homo sapiens GN=TSFM PE=1 SV=2	7	7	15	45000000	46000000	72000000	79000000	63000000	65000000	45500000	69750000	1.53297	0.616327	0.00630431	2.20036	64000000	71000000	1.40659	1.56044	0.492205	0.641952	4	TRUE	TRUE	TRUE	12	411	2.91971	Tmito	EFTS|EFTSMT|P43897	ENSG00000123297
FXN	Frataxin, mitochondrial OS=Homo sapiens GN=FXN PE=1 SV=2	3	3	10			77000000	80000000	53000000	58000000	0	67000000	100	6.64386	0.0021709	2.66336	55500000	66500000	100	100	6.64386	6.64386	4	TRUE	TRUE	TRUE	0	411	0	Tmito	CyaY|FA|FARR|FRDA|X25|Q16595	ENSG00000165060
NFU1	NFU1 iron-sulfur cluster scaffold homolog, mitochondrial OS=Homo sapiens GN=NFU1 PE=1 SV=2	3	3	12	48000000		34000000	46000000	29000000	31000000	24000000	35000000	1.45833	0.544321	0.72647	0.138782	30000000	37500000	1.25	1.5625	0.321928	0.643856	4	FALSE	TRUE	TRUE	0	411	0	Tmito	HIRIP|HIRIP5|MMDS1|NIFUC|Nfu|NifU|Q9UMS0	ENSG00000169599
YARS2	Tyrosine--tRNA ligase, mitochondrial OS=Homo sapiens GN=YARS2 PE=1 SV=2	6	6	21	32000000	36000000	32000000	48000000	27000000	26000000	34000000	33250000	0.977941	-0.0321804	0.897977	0.0467349	26500000	37500000	0.779412	1.10294	-0.359542	0.141356	4	FALSE	TRUE	TRUE	16	411	3.89294	Tmito	MLASA2|MT-TYRRS|TYRRS|Q9Y2Z4	ENSG00000139131
MRPL21	39S ribosomal protein L21, mitochondrial OS=Homo sapiens GN=MRPL21 PE=1 SV=2	1	1	1		24000000					12000000	0	0		0.5	0.30103	0	0	0	0			0	FALSE	FALSE	FALSE	6	411	1.45985	Tmito	L21mt|MRP-L21|Q7Z2W9	ENSG00000197345
ALDH4A1	Delta-1-pyrroline-5-carboxylate dehydrogenase, mitochondrial OS=Homo sapiens GN=ALDH4A1 PE=1 SV=3	3	3	4			39000000	36000000	15000000		0	22500000	100	6.64386	0.0921655	1.03543	7500000	25500000	100	100	6.64386	6.64386	3	FALSE	TRUE	FALSE	3	411	0.729927	Tmito	ALDH4|P5CD|P5CDh|P30038	ENSG00000159423
NDUFB10	NADH dehydrogenase [ubiquinone] 1 beta subcomplex subunit 10 OS=Homo sapiens GN=NDUFB10 PE=1 SV=3	1	1	1			55000000				0	13750000	100	6.64386	0.391002	0.407821	0	0	0	0			1	FALSE	FALSE	FALSE	10	411	2.43309	Tmito	PDSW|O96000	ENSG00000140990
ACADSB	Short/branched chain specific acyl-CoA dehydrogenase, mitochondrial OS=Homo sapiens GN=ACADSB PE=1 SV=1	6	6	15	150000000	120000000	37000000	38000000	25000000	29000000	135000000	32250000	0.238889	-2.06559	0.0810238	1.09139	27000000	31500000	0.2	0.233333	-2.32193	-2.09954	4	FALSE	TRUE	TRUE	7	411	1.70316	Tmito	2-MEBCAD|ACAD7|SBCAD|P45954	ENSG00000196177
MRPS9	28S ribosomal protein S9, mitochondrial OS=Homo sapiens GN=MRPS9 PE=1 SV=2	2	2	2						31000000	0	7750000	100	6.64386	0.391002	0.407821	15500000	0	100	0	6.64386		1	FALSE	FALSE	FALSE	27	411	6.56934	Tmito	MRP-S9|RPMS9|S9mt|P82933	ENSG00000135972
ADCK3	Chaperone activity of bc1 complex-like, mitochondrial OS=Homo sapiens GN=ADCK3 PE=1 SV=1	7	7	17	31000000	61000000	36000000	53000000	27000000	43000000	46000000	39750000	0.86413	-0.210679	0.750811	0.12447	35000000	40000000	0.76087	0.869565	-0.394279	-0.201634	4	FALSE	TRUE	TRUE	11	411	2.6764	Tmito	ARCA2|CABC1|COQ10D4|COQ8|SCAR9|Q8NI60	ENSG00000163050
ACADVL	Isoform 3 of Very long-chain specific acyl-CoA dehydrogenase, mitochondrial OS=Homo sapiens GN=ACADVL	8	8	18	17000000	110000000	29000000	35000000	19000000	26000000	63500000	27250000	0.429134	-1.2205	0.578173	0.237943	22500000	27000000	0.354331	0.425197	-1.49683	-1.2338	4	FALSE	TRUE	TRUE	29	411	7.05596	Tmito	ACAD6|LCACD|VLCAD|P49748	ENSG00000072778
HSPD1	60 kDa heat shock protein, mitochondrial OS=Homo sapiens GN=HSPD1 PE=1 SV=2	35	35	841	3500000000	3500000000	3800000000	6800000000	5100000000	4100000000	3500000000	4950000000	1.41429	0.500074	0.121423	0.915699	4600000000	5950000000	1.31429	1.7	0.394279	0.765535	4	FALSE	TRUE	TRUE	231	411	56.2044	Tmito	CPN60|GROEL|HLD4|HSP-60|HSP60|HSP65|HuCHA60|SPG13|P10809	ENSG00000144381
AK3	GTP:AMP phosphotransferase AK3, mitochondrial OS=Homo sapiens GN=AK3 PE=1 SV=4	3	3	11	34000000	36000000	36000000	68000000	95000000	80000000	35000000	69750000	1.99286	0.994838	0.0689351	1.16156	87500000	81500000	2.5	2.32857	1.32193	1.21945	4	FALSE	TRUE	TRUE	4	411	0.973236	Tmito	AK3L1|AK6|AKL3L|AKL3L1|FIX|Q9UIJ7	ENSG00000147853
CYCS	Cytochrome c OS=Homo sapiens GN=CYCS PE=1 SV=2	6	6	59	320000000	270000000	360000000	420000000	220000000	220000000	295000000	305000000	1.0339	0.0480943	0.868059	0.0614505	220000000	320000000	0.745763	1.08475	-0.423211	0.117357	4	FALSE	TRUE	TRUE	23	411	5.59611	Tmito	CYC|HCS|THC4|P99999	ENSG00000172115
MIPEP	Mitochondrial intermediate peptidase OS=Homo sapiens GN=MIPEP PE=1 SV=2	3	3	3		22000000	20000000				11000000	5000000	0.454545	-1.1375	0.684849	0.164405	0	0	0	0			1	FALSE	TRUE	FALSE	1	411	0.243309	Tmito	HMIP|MIP|Q99797	ENSG00000027001
LYRM7	Complex III assembly factor LYRM7 OS=Homo sapiens GN=LYRM7 PE=1 SV=1	3	3	8	43000000	44000000	28000000	50000000	46000000	45000000	43500000	42250000	0.971264	-0.0420641	0.814704	0.0890001	45500000	48000000	1.04598	1.10345	0.0648511	0.142019	4	FALSE	TRUE	TRUE	1	411	0.243309	Tmito	C5orf31|MZM1L|Q5U5X0	ENSG00000186687
PCCB	Propionyl-CoA carboxylase beta chain, mitochondrial OS=Homo sapiens GN=PCCB PE=2 SV=1	1	1	1			17000000				0	4250000	100	6.64386	0.391002	0.407821	0	0	0	0			1	FALSE	FALSE	FALSE	93	411	22.6277	Tmito	P05166	ENSG00000114054
MRPS7	28S ribosomal protein S7, mitochondrial OS=Homo sapiens GN=MRPS7 PE=2 SV=1	2	2	8			46000000	41000000	25000000	31000000	0	35750000	100	6.64386	0.00486171	2.31321	28000000	33000000	100	100	6.64386	6.64386	4	TRUE	FALSE	TRUE	29	411	7.05596	Tmito	MRP-S|MRP-S7|RP-S7|RPMS7|S7mt|bMRP27a|Q9Y2R9	ENSG00000125445
MRPS12	28S ribosomal protein S12, mitochondrial OS=Homo sapiens GN=MRPS12 PE=1 SV=1	1	1	1					47000000		0	11750000	100	6.64386	0.391002	0.407821	23500000	23500000	100	100	6.64386	6.64386	1	FALSE	FALSE	FALSE	8	411	1.94647	Tmito	MPR-S12|MT-RPS12|RPMS12|RPS12|RPSM12|O15235	ENSG00000128626
CLPB	Isoform 2 of Caseinolytic peptidase B protein homolog OS=Homo sapiens GN=CLPB	9	9	41	74000000	47000000	65000000	83000000	50000000	63000000	60500000	65250000	1.07851	0.109043	0.790636	0.102024	56500000	66500000	0.933884	1.09917	-0.0986843	0.136419	4	FALSE	TRUE	TRUE	30	411	7.29927	Tmito	HSP78|SKD3|Q9H078	ENSG00000162129
MRPL49	39S ribosomal protein L49, mitochondrial OS=Homo sapiens GN=MRPL49 PE=1 SV=1	2	2	8	19000000	22000000	23000000	26000000	20000000		20500000	17250000	0.841463	-0.249028	0.625644	0.203673	10000000	23000000	0.487805	1.12195	-1.03562	0.16601	3	FALSE	FALSE	TRUE	13	411	3.16302	Tmito	C11orf4|L49mt|MRP-L49|NOF|NOF1|Q13405	ENSG00000149792
COX7A2	Cytochrome c oxidase subunit 7A2, mitochondrial OS=Homo sapiens GN=COX7A2 PE=4 SV=1	1	1	2						71000000	0	17750000	100	6.64386	0.391002	0.407821	35500000	0	100	0	6.64386		1	FALSE	FALSE	FALSE	12	411	2.91971	Tmito	COX7AL|COX7AL1|COXVIIAL|COXVIIa-L|VIIAL|P14406	ENSG00000112695
HCCS	Cytochrome c-type heme lyase OS=Homo sapiens GN=HCCS PE=1 SV=1	1	1	5		12000000	35000000	38000000	26000000	30000000	6000000	32250000	5.375	2.42626	0.0980787	1.00843	28000000	32000000	4.66667	5.33333	2.22239	2.41504	4	FALSE	FALSE	TRUE	6	411	1.45985	Tmito	CCHL|MCOPS7|MLS|P53701	ENSG00000004961
HIBADH	3-hydroxyisobutyrate dehydrogenase, mitochondrial OS=Homo sapiens GN=HIBADH PE=1 SV=2	4	4	15	61000000	47000000	35000000	47000000	51000000	31000000	54000000	41000000	0.759259	-0.397335	0.264609	0.577395	41000000	49000000	0.759259	0.907407	-0.397335	-0.140178	4	FALSE	TRUE	TRUE	5	411	1.21655	Tmito	NS5ATP1|P31937	ENSG00000106049
MRPL19	39S ribosomal protein L19, mitochondrial OS=Homo sapiens GN=MRPL19 PE=1 SV=2	1	1	1			29000000				0	7250000	100	6.64386	0.391002	0.407821	0	0	0	0			1	FALSE	FALSE	FALSE	15	411	3.64964	Tmito	L19mt|MRP-L15|MRP-L19|MRPL15|RLX1|RP11-342K6.1|RPML15|P49406	ENSG00000115364
MTX1	Metaxin-1 OS=Homo sapiens GN=MTX1 PE=1 SV=2	2	2	2		21000000	17000000				10500000	4250000	0.404762	-1.30485	0.658811	0.181239	0	0	0	0			1	FALSE	FALSE	FALSE	2	411	0.486618	Tmito	MTX|MTXN|Q13505	ENSG00000173171
ALDH9A1	4-trimethylaminobutyraldehyde dehydrogenase OS=Homo sapiens GN=ALDH9A1 PE=1 SV=3	8	8	15	55000000	39000000	24000000	28000000	26000000	27000000	47000000	26250000	0.558511	-0.840343	0.230959	0.636465	26500000	27000000	0.56383	0.574468	-0.826668	-0.799701	4	FALSE	TRUE	TRUE	40	411	9.73236	Tmito	ALDH4|ALDH7|ALDH9|E3|TMABADH|P49189	ENSG00000143149
MRPS18C	28S ribosomal protein S18c, mitochondrial OS=Homo sapiens GN=MRPS18C PE=1 SV=1	1	1	1			17000000				0	4250000	100	6.64386	0.391002	0.407821	0	0	0	0			1	FALSE	FALSE	FALSE	0	411	0	Tmito	MRP-S18-1|MRPS18-1|Q9Y3D5	ENSG00000163319
MARS2	Methionine--tRNA ligase, mitochondrial OS=Homo sapiens GN=MARS2 PE=1 SV=2	1	1	2			9300000	16000000			0	6325000	100	6.64386	0.20325	0.69197	0	8000000	0	100		6.64386	2	FALSE	FALSE	FALSE	1	411	0.243309	Tmito	MetRS|SPAX3|mtMetRS|Q96GW9	ENSG00000247626
ALDH6A1	Methylmalonate-semialdehyde dehydrogenase [acylating], mitochondrial OS=Homo sapiens GN=ALDH6A1 PE=1 SV=2	6	6	14	31000000	26000000	27000000	38000000	95000000	34000000	28500000	48500000	1.70175	0.767023	0.292737	0.533523	64500000	66500000	2.26316	2.33333	1.17834	1.22239	4	FALSE	TRUE	TRUE	1	411	0.243309	Tmito	MMSADHA|MMSDH|Q02252	ENSG00000119711
FDXR	Isoform 3 of NADPH:adrenodoxin oxidoreductase, mitochondrial OS=Homo sapiens GN=FDXR	1	1	2			16000000	17000000			0	8250000	100	6.64386	0.181982	0.739971	0	8500000	0	100		6.64386	2	FALSE	FALSE	FALSE	7	411	1.70316	Tmito	ADXR|P22570	ENSG00000161513
TRAP1	Heat shock protein 75 kDa, mitochondrial OS=Homo sapiens GN=TRAP1 PE=1 SV=3	25	26	224	2300000000	2000000000	950000000	1600000000	1300000000	1100000000	2150000000	1237500000	0.575581	-0.796908	0.0244338	1.61201	1200000000	1450000000	0.55814	0.674419	-0.841302	-0.568284	4	TRUE	TRUE	TRUE	118	411	28.7105	Tmito	HSP 75|HSP75|HSP90L|TRAP-1|Q12931	ENSG00000126602
ALDH2	Aldehyde dehydrogenase, mitochondrial OS=Homo sapiens GN=ALDH2 PE=1 SV=2	14	15	75	130000000	94000000	120000000	160000000	110000000	130000000	112000000	130000000	1.16071	0.215013	0.491304	0.30865	120000000	135000000	1.07143	1.20536	0.0995357	0.269461	4	FALSE	TRUE	TRUE	18	411	4.37956	Tmito	ALDH-E2|ALDHI|ALDM|P05091	ENSG00000111275
PPIF	Peptidyl-prolyl cis-trans isomerase F, mitochondrial OS=Homo sapiens GN=PPIF PE=1 SV=1	4	5	26	170000000	160000000	150000000	190000000	180000000	110000000	165000000	157500000	0.954545	-0.0671142	0.711446	0.147858	145000000	185000000	0.878788	1.12121	-0.186413	0.165059	4	FALSE	TRUE	TRUE	28	411	6.81265	Tmito	CYP3|CyP-M|Cyp-D|CypD|P30405	ENSG00000108179
IVD	Isovaleryl Coenzyme A dehydrogenase, isoform CRA_a OS=Homo sapiens GN=IVD PE=3 SV=1	7	7	18	35000000	34000000	44000000	55000000	36000000	46000000	34500000	45250000	1.31159	0.391321	0.0693223	1.15913	41000000	45500000	1.18841	1.31884	0.249028	0.39927	4	FALSE	TRUE	TRUE	10	411	2.43309	Tmito	ACAD2|P26440	ENSG00000128928
L2HGDH	L-2-hydroxyglutarate dehydrogenase, mitochondrial OS=Homo sapiens GN=L2HGDH PE=1 SV=3	4	4	13	20000000	27000000	36000000	63000000	26000000	27000000	23500000	38000000	1.61702	0.693339	0.198925	0.701311	26500000	44500000	1.12766	1.89362	0.173332	0.921145	4	FALSE	TRUE	TRUE	6	411	1.45985	Tmito	C14orf160|Q9H9P8	ENSG00000087299
ETHE1	Persulfide dioxygenase ETHE1, mitochondrial OS=Homo sapiens GN=ETHE1 PE=2 SV=1	1	1	1				55000000			0	13750000	100	6.64386	0.391002	0.407821	0	27500000	0	100		6.64386	1	FALSE	FALSE	FALSE	1	411	0.243309	Tmito	HSCO|YF13H12|O95571	ENSG00000105755
SLC25A5	ADP/ATP translocase 2 OS=Homo sapiens GN=SLC25A5 PE=1 SV=7	3	10	42	130000000	88000000	72000000	95000000	110000000	150000000	109000000	106750000	0.979358	-0.0300921	0.939474	0.0271152	130000000	102500000	1.19266	0.940367	0.254183	-0.0887042	4	FALSE	TRUE	TRUE	223	411	54.2579	Tmito	2F1|AAC2|ANT2|T2|T3|P05141	ENSG00000005022
TOMM22	Mitochondrial import receptor subunit TOM22 homolog OS=Homo sapiens GN=TOMM22 PE=1 SV=3	2	2	6	10000000	7400000	13000000	11000000	47000000	57000000	8700000	32000000	3.67816	1.87898	0.140751	0.851549	52000000	29000000	5.97701	3.33333	2.57942	1.73697	4	FALSE	FALSE	TRUE	24	411	5.83942	Tmito	1C9-2|MST065|MSTP065|TOM22|Q9NS69	ENSG00000100216
ACAA2	3-ketoacyl-CoA thiolase, mitochondrial OS=Homo sapiens GN=ACAA2 PE=1 SV=2	2	2	5	46000000		41000000		28000000	40000000	23000000	27250000	1.18478	0.244622	0.886332	0.0524036	34000000	14000000	1.47826	0.608696	0.563901	-0.716207	3	FALSE	FALSE	TRUE	25	411	6.08273	Tmito	DSAEC|P42765	ENSG00000167315
DNAJA3	DnaJ homolog subfamily A member 3, mitochondrial OS=Homo sapiens GN=DNAJA3 PE=1 SV=2	3	3	10	27000000	29000000	32000000	63000000	25000000	22000000	28000000	35500000	1.26786	0.342392	0.484473	0.31473	23500000	44000000	0.839286	1.57143	-0.252766	0.652077	4	FALSE	TRUE	TRUE	33	411	8.0292	Tmito	HCA57|TID1|hTID-1|Q96EY1	ENSG00000103423
MRPS34	28S ribosomal protein S34, mitochondrial OS=Homo sapiens GN=MRPS34 PE=2 SV=2	4	4	12		13000000	26000000	31000000	25000000	30000000	6500000	28000000	4.30769	2.10692	0.172183	0.76401	27500000	28000000	4.23077	4.30769	2.08092	2.10692	4	FALSE	TRUE	TRUE	24	411	5.83942	Tmito	MRP-S12|MRP-S34|MRPS12|P82930	ENSG00000074071
ETFB	Isoform 2 of Electron transfer flavoprotein subunit beta OS=Homo sapiens GN=ETFB	8	8	44	130000000	180000000	130000000	140000000	110000000	130000000	155000000	127500000	0.822581	-0.281771	0.462932	0.334483	120000000	125000000	0.774194	0.806452	-0.369234	-0.31034	4	FALSE	TRUE	TRUE	24	411	5.83942	Tmito	MADD|P38117	ENSG00000105379
ATPIF1	ATPase inhibitor, mitochondrial OS=Homo sapiens GN=ATPIF1 PE=1 SV=1	1	1	2		7600000			14000000		3800000	3500000	0.921053	-0.118644	0.957644	0.0187958	7000000	7000000	1.84211	1.84211	0.881356	0.881356	1	FALSE	FALSE	FALSE	6	411	1.45985	Tmito	ATPI|ATPIP|IP|Q9UII2	ENSG00000130770
ATP5F1	ATP synthase F(0) complex subunit B1, mitochondrial OS=Homo sapiens GN=ATP5F1 PE=1 SV=2	1	1	1				38000000			0	9500000	100	6.64386	0.391002	0.407821	0	19000000	0	100		6.64386	1	FALSE	FALSE	FALSE	33	411	8.0292	Tmito	PIG47|P24539	ENSG00000116459
CHCHD3	Coiled-coil-helix-coiled-coil-helix domain-containing protein 3, mitochondrial OS=Homo sapiens GN=CHCHD3 PE=2 SV=1	2	2	4			17000000	22000000	29000000	18000000	0	21500000	100	6.64386	0.0042358	2.37306	23500000	25500000	100	100	6.64386	6.64386	4	TRUE	FALSE	FALSE	16	411	3.89294	Tmito	MINOS3|PPP1R22|Q9NX63	ENSG00000106554
POLDIP2	Polymerase delta-interacting protein 2 OS=Homo sapiens GN=POLDIP2 PE=1 SV=1	8	8	25	50000000	57000000	93000000	120000000	45000000	60000000	53500000	79500000	1.48598	0.571416	0.22052	0.656552	52500000	82500000	0.981308	1.54206	-0.0272215	0.624855	4	FALSE	TRUE	TRUE	36	411	8.75912	Tmito	PDIP38|POLD4|Q9Y2S7	ENSG00000004142
SLC25A10	Mitochondrial dicarboxylate carrier OS=Homo sapiens GN=SLC25A10 PE=2 SV=1	1	7	41						22000000	0	5500000	100	6.64386	0.391002	0.407821	11000000	0	100	0	6.64386		1	FALSE	TRUE	TRUE	32	411	7.78589	Tmito	DIC|Q9UBX3	ENSG00000183048
ME3	NADP-dependent malic enzyme, mitochondrial OS=Homo sapiens GN=ME3 PE=2 SV=2	1	1	1	42000000						21000000	0	0		0.5	0.30103	0	0	0	0			0	FALSE	FALSE	FALSE	1	411	0.243309	Tmito	NADP-ME|Q16798	ENSG00000151376
MRPL22	39S ribosomal protein L22, mitochondrial OS=Homo sapiens GN=MRPL22 PE=2 SV=1	2	2	4		10000000				21000000	5000000	5250000	1.05	0.0703893	0.974564	0.0111894	10500000	0	2.1	0	1.07039		1	FALSE	FALSE	FALSE	22	411	5.3528	Tmito	L22mt|MRP-L22|MRP-L25|RPML25|Q9NWU5	ENSG00000082515
IDH2	Isocitrate dehydrogenase [NADP], mitochondrial OS=Homo sapiens GN=IDH2 PE=1 SV=2	15	15	58	58000000	63000000	98000000	140000000	74000000	81000000	60500000	98250000	1.62397	0.699522	0.0821635	1.08532	77500000	107000000	1.28099	1.7686	0.357261	0.822604	4	FALSE	TRUE	TRUE	19	411	4.62287	Tmito	D2HGA2|ICD-M|IDH|IDHM|IDP|IDPM|mNADP-IDH|P48735	ENSG00000182054
GCDH	Glutaryl-CoA dehydrogenase, mitochondrial OS=Homo sapiens GN=GCDH PE=1 SV=1	4	4	17	60000000	59000000	60000000	91000000	58000000	68000000	59500000	69250000	1.16387	0.218924	0.288002	0.540604	63000000	74500000	1.05882	1.2521	0.0824622	0.324351	4	FALSE	TRUE	TRUE	9	411	2.18978	Tmito	ACAD5|GCD|Q92947	ENSG00000105607
MRPL47	39S ribosomal protein L47, mitochondrial OS=Homo sapiens GN=MRPL47 PE=1 SV=2	1	1	1				34000000			0	8500000	100	6.64386	0.391002	0.407821	0	17000000	0	100		6.64386	1	FALSE	FALSE	FALSE	16	411	3.89294	Tmito	L47mt|MRP-L47|NCM1|Q9HD33	ENSG00000136522
PPA2	Isoform 2 of Inorganic pyrophosphatase 2, mitochondrial OS=Homo sapiens GN=PPA2	7	8	31	99000000	79000000	63000000	89000000	58000000	73000000	89000000	70750000	0.794944	-0.331075	0.270478	0.567867	65500000	73500000	0.735955	0.825843	-0.44231	-0.276061	4	FALSE	TRUE	TRUE	25	411	6.08273	Tmito	SID6-306|Q9H2U2	ENSG00000138777
WARS2	Tryptophan--tRNA ligase, mitochondrial OS=Homo sapiens GN=WARS2 PE=1 SV=1	2	2	3		9700000	16000000				4850000	4000000	0.824742	-0.277985	0.902781	0.0444174	0	0	0	0			1	FALSE	FALSE	FALSE	0	411	0	Tmito	TrpRS|Q9UGM6	ENSG00000116874
HAGH	Hydroxyacylglutathione hydrolase, mitochondrial OS=Homo sapiens GN=HAGH PE=1 SV=2	1	1	2	34000000			45000000			17000000	11250000	0.661765	-0.59561	0.805083	0.0941595	0	22500000	0	1.32353		0.40439	1	FALSE	FALSE	FALSE	47	411	11.4355	Tmito	GLO2|GLX2|GLXII|HAGH1|Q16775	ENSG00000063854
NDUFA10	NADH dehydrogenase [ubiquinone] 1 alpha subcomplex subunit 10, mitochondrial OS=Homo sapiens GN=NDUFA10 PE=2 SV=1	1	1	3			20000000	39000000	14000000		0	18250000	100	6.64386	0.109251	0.961573	7000000	26500000	100	100	6.64386	6.64386	3	FALSE	FALSE	FALSE	16	411	3.89294	Tmito	CI-42KD|CI-42k|O95299	ENSG00000130414
SLIRP	SRA stem-loop-interacting RNA-binding protein, mitochondrial OS=Homo sapiens GN=SLIRP PE=2 SV=1	3	3	17	52000000	23000000	72000000	87000000	42000000	53000000	37500000	63500000	1.69333	0.759866	0.276477	0.55834	47500000	64500000	1.26667	1.72	0.341037	0.782409	4	FALSE	TRUE	TRUE	53	411	12.8954	Tmito	C14orf156|DC50|PD04872|Q9GZT3	ENSG00000119705
NDUFA8	NADH dehydrogenase [ubiquinone] 1 alpha subcomplex subunit 8 OS=Homo sapiens GN=NDUFA8 PE=1 SV=3	3	3	7	23000000	26000000	35000000		26000000	32000000	24500000	23250000	0.94898	-0.075551	0.886743	0.0522021	29000000	13000000	1.18367	0.530612	0.243271	-0.91427	3	FALSE	TRUE	TRUE	4	411	0.973236	Tmito	CI-19KD|CI-PGIV|PGIV|P51970	ENSG00000119421
GLS	Isoform 3 of Glutaminase kidney isoform, mitochondrial OS=Homo sapiens GN=GLS	10	10	55	88000000	66000000	89000000	95000000	56000000	61000000	77000000	75250000	0.977273	-0.0331669	0.913841	0.0391292	58500000	75500000	0.75974	0.980519	-0.396422	-0.0283818	4	FALSE	TRUE	TRUE	17	411	4.13625	Tmito	AAD20|GAC|GAM|GLS1|KGA|O94925	ENSG00000115419
DHTKD1	Probable 2-oxoglutarate dehydrogenase E1 component DHKTD1, mitochondrial OS=Homo sapiens GN=DHTKD1 PE=1 SV=2	1	1	2			12000000	20000000			0	8000000	100	6.64386	0.200976	0.696855	0	10000000	0	100		6.64386	2	FALSE	FALSE	FALSE	5	411	1.21655	Tmito	AMOXAD|CMT2Q|Q96HY7	ENSG00000181192
HSD17B8	Estradiol 17-beta-dehydrogenase 8 OS=Homo sapiens GN=HSD17B8 PE=1 SV=2	1	1	6	8700000	8700000	12000000	12000000	7600000	8800000	8700000	10100000	1.16092	0.215268	0.30134	0.520943	8200000	9800000	0.942529	1.12644	-0.0853915	0.171766	4	FALSE	FALSE	TRUE	0	411	0	Tmito	D6S2245E|FABG|FABGL|H2-KE6|HKE6|KE6|RING2|SDR30C1|dJ1033B10.9|Q92506	ENSG00000112474
HINT2	Histidine triad nucleotide-binding protein 2, mitochondrial OS=Homo sapiens GN=HINT2 PE=1 SV=1	2	2	14	90000000	170000000	100000000	130000000	53000000	62000000	130000000	86250000	0.663462	-0.591915	0.457673	0.339445	57500000	91500000	0.442308	0.703846	-1.17688	-0.506668	4	FALSE	FALSE	TRUE	3	411	0.729927	Tmito	HIT-17|Q9BX68	ENSG00000137133
SPRYD4	SPRY domain-containing protein 4 OS=Homo sapiens GN=SPRYD4 PE=1 SV=2	1	1	1			22000000				0	5500000	100	6.64386	0.391002	0.407821	0	0	0	0			1	FALSE	FALSE	FALSE	3	411	0.729927	Tmito	Q8WW59	ENSG00000176422
STOML2	Stomatin-like protein 2, mitochondrial OS=Homo sapiens GN=STOML2 PE=1 SV=1	6	6	13	15000000	19000000	28000000	45000000	22000000	29000000	17000000	31000000	1.82353	0.866733	0.0614002	1.21183	25500000	33500000	1.5	1.97059	0.584963	0.978626	4	FALSE	TRUE	TRUE	32	411	7.78589	Tmito	SLP-2|Q9UJZ1	ENSG00000165283
VWA8	von Willebrand factor A domain-containing protein 8 OS=Homo sapiens GN=VWA8 PE=1 SV=2	1	1	1				10000000			0	2500000	100	6.64386	0.391002	0.407821	0	5000000	0	100		6.64386	1	FALSE	FALSE	FALSE	1	411	0.243309	Tmito	KIAA0564|A3KMH1	ENSG00000102763
GLDC	Glycine dehydrogenase (decarboxylating), mitochondrial OS=Homo sapiens GN=GLDC PE=1 SV=2	3	3	6	24000000		18000000	32000000	17000000	19000000	12000000	21500000	1.79167	0.841302	0.570294	0.243901	18000000	24500000	1.5	2.04167	0.584963	1.02975	4	FALSE	TRUE	TRUE	2	411	0.486618	Tmito	GCE|GCSP|HYGN1|P23378	ENSG00000178445
SSBP1	Single-stranded DNA-binding protein, mitochondrial OS=Homo sapiens GN=SSBP1 PE=1 SV=1	7	7	98	600000000	480000000	830000000	1100000000	720000000	590000000	540000000	810000000	1.5	0.584963	0.0949097	1.02269	655000000	910000000	1.21296	1.68519	0.278535	0.752907	4	FALSE	TRUE	TRUE	78	411	18.9781	Tmito	Mt-SSB|SOSS-B1|SSBP|mtSSB|Q04837	ENSG00000106028
MRPS10	28S ribosomal protein S10, mitochondrial OS=Homo sapiens GN=MRPS10 PE=1 SV=2	3	3	8		26000000	35000000	61000000	82000000	37000000	13000000	53750000	4.13462	2.04775	0.112889	0.94735	59500000	71500000	4.57692	5.5	2.19438	2.45943	4	FALSE	TRUE	TRUE	5	411	1.21655	Tmito	MRP-S10|PNAS-122|P82664	ENSG00000048544
AK4	Adenylate kinase 4, mitochondrial OS=Homo sapiens GN=AK4 PE=1 SV=1	3	3	9	29000000	150000000	36000000	39000000	130000000	23000000	89500000	57000000	0.636872	-0.650926	0.687823	0.162523	76500000	84500000	0.854749	0.944134	-0.226428	-0.0829363	4	FALSE	TRUE	TRUE	3	411	0.729927	Tmito	AK 4|AK3|AK3L1|AK3L2|P27144	ENSG00000162433
ATAD3A	ATPase family AAA domain-containing protein 3A OS=Homo sapiens GN=ATAD3A PE=1 SV=2	1	1	3				47000000	91000000		0	34500000	100	6.64386	0.212463	0.672716	45500000	69000000	100	100	6.64386	6.64386	2	FALSE	FALSE	FALSE	87	411	21.1679	Tmito	Q9NVI7	ENSG00000197785
PTGES2	Prostaglandin E synthase 2 OS=Homo sapiens GN=PTGES2 PE=1 SV=1	7	7	36	64000000	58000000	65000000	100000000	79000000	91000000	61000000	83750000	1.37295	0.45728	0.053335	1.27299	85000000	89500000	1.39344	1.46721	0.478654	0.553078	4	FALSE	TRUE	TRUE	3	411	0.729927	Tmito	C9orf15|GBF-1|GBF1|PGES2|mPGES-2|Q9H7Z7	ENSG00000148334
TXNRD2	Thioredoxin reductase 2, mitochondrial OS=Homo sapiens GN=TXNRD2 PE=1 SV=3	5	6	12	57000000	34000000	38000000	49000000	7300000	10000000	45500000	26075000	0.573077	-0.803199	0.307132	0.512675	8650000	28150000	0.19011	0.618681	-2.39509	-0.692732	4	FALSE	TRUE	TRUE	0	411	0	Tmito	SELZ|TR|TR-BETA|TR3|TRXR2|Q9NNW7	ENSG00000184470
MRPL41	39S ribosomal protein L41, mitochondrial OS=Homo sapiens GN=MRPL41 PE=1 SV=1	1	1	2				7500000	3100000		0	2650000	100	6.64386	0.232102	0.634321	1550000	5300000	100	100	6.64386	6.64386	2	FALSE	FALSE	FALSE	17	411	4.13625	Tmito	BMRP|MRP-L27|MRPL27|RPML27|Q8IXM3	ENSG00000182154
MRPS6	28S ribosomal protein S6, mitochondrial OS=Homo sapiens GN=MRPS6 PE=1 SV=3	1	1	1	32000000						16000000	0	0		0.5	0.30103	0	0	0	0			0	FALSE	FALSE	FALSE	8	411	1.94647	Tmito	C21orf101|MRP-S6|RPMS6|S6mt|P82932	ENSG00000243927
MRPL23	39S ribosomal protein L23, mitochondrial OS=Homo sapiens GN=MRPL23 PE=2 SV=1	2	2	4			19000000		20000000	26000000	0	16250000	100	6.64386	0.0632778	1.19875	23000000	10000000	100	100	6.64386	6.64386	3	FALSE	FALSE	FALSE	14	411	3.40633	Tmito	L23MRP|RPL23|RPL23L|Q16540	ENSG00000214026
GCAT	Isoform 2 of 2-amino-3-ketobutyrate coenzyme A ligase, mitochondrial OS=Homo sapiens GN=GCAT	1	1	1		27000000					13500000	0	0		0.5	0.30103	0	0	0	0			0	FALSE	FALSE	FALSE	5	411	1.21655	Tmito	KBL|O75600	ENSG00000100116
MTHFD1L	Monofunctional C1-tetrahydrofolate synthase, mitochondrial OS=Homo sapiens GN=MTHFD1L PE=1 SV=1	15	15	55	52000000	43000000	45000000	67000000	46000000	51000000	47500000	52250000	1.1	0.137504	0.529731	0.275945	48500000	56500000	1.02105	1.18947	0.0300572	0.250323	4	FALSE	TRUE	TRUE	75	411	18.2482	Tmito	FTHFSDC1|MTC1THFS|dJ292B18.2|Q6UB35	ENSG00000120254
ECI2	Enoyl-CoA delta isomerase 2, mitochondrial OS=Homo sapiens GN=ECI2 PE=1 SV=4	7	7	30	93000000	53000000	79000000	99000000	64000000	78000000	73000000	80000000	1.09589	0.132104	0.787978	0.103486	71000000	81500000	0.972603	1.11644	-0.0400774	0.158904	4	FALSE	TRUE	TRUE	16	411	3.89294	Tmito	ACBD2|DRS-1|DRS1|HCA88|PECI|dJ1013A10.3|O75521	ENSG00000198721
UQCRB	Cytochrome b-c1 complex subunit 7 OS=Homo sapiens GN=UQCRB PE=1 SV=2	1	1	1					46000000		0	11500000	100	6.64386	0.391002	0.407821	23000000	23000000	100	100	6.64386	6.64386	1	FALSE	FALSE	FALSE	1	411	0.243309	Tmito	MC3DN3|QCR7|QP-C|QPC|UQBC|UQBP|UQCR6|UQPC|P14927	ENSG00000156467
ATP5H	ATP synthase subunit d, mitochondrial OS=Homo sapiens GN=ATP5H PE=1 SV=3	5	5	15	58000000	21000000	35000000	38000000	25000000	44000000	39500000	35500000	0.898734	-0.154034	0.865048	0.0629599	34500000	31500000	0.873418	0.797468	-0.195256	-0.326501	4	FALSE	TRUE	TRUE	28	411	6.81265	Tmito	ATPQ|O75947	ENSG00000167863
ATP5L	ATP synthase subunit g, mitochondrial OS=Homo sapiens GN=ATP5L PE=1 SV=3	3	3	10	52000000	36000000	52000000	77000000	70000000	97000000	44000000	74000000	1.68182	0.750022	0.0812097	1.09039	83500000	73500000	1.89773	1.67045	0.924273	0.740241	4	FALSE	TRUE	TRUE	22	411	5.3528	Tmito	ATP5JG|O75964	ENSG00000167283
CCDC58	Coiled-coil domain-containing protein 58 OS=Homo sapiens GN=CCDC58 PE=1 SV=1	2	2	3				130000000	100000000	7200000	0	59300000	100	6.64386	0.168054	0.774552	53600000	115000000	100	100	6.64386	6.64386	3	FALSE	FALSE	FALSE	0	411	0	Tmito	Q4VC31	ENSG00000160124
MCCC2	Methylcrotonoyl-CoA carboxylase beta chain, mitochondrial OS=Homo sapiens GN=MCCC2 PE=1 SV=1	6	6	20	53000000	53000000	41000000	55000000	37000000	35000000	53000000	42000000	0.792453	-0.335603	0.0925473	1.03364	36000000	46000000	0.679245	0.867925	-0.557995	-0.204358	4	FALSE	TRUE	TRUE	93	411	22.6277	Tmito	MCCB|Q9HCC0	ENSG00000131844
MUT	Methylmalonyl-CoA mutase, mitochondrial OS=Homo sapiens GN=MUT PE=1 SV=4	7	7	22	53000000	40000000	33000000	36000000	28000000	41000000	46500000	34500000	0.741935	-0.430634	0.284379	0.546102	34500000	32000000	0.741935	0.688172	-0.430634	-0.539159	4	FALSE	TRUE	TRUE	5	411	1.21655	Tmito	MCM|P22033	ENSG00000146085
DARS2	Aspartate--tRNA ligase, mitochondrial OS=Homo sapiens GN=DARS2 PE=1 SV=1	14	14	45	81000000	72000000	58000000	130000000	91000000	61000000	76500000	85000000	1.11111	0.152003	0.653986	0.184432	76000000	110500000	0.993464	1.44444	-0.00946033	0.530515	4	FALSE	TRUE	TRUE	28	411	6.81265	Tmito	ASPRS|LBSL|MT-ASPRS|RP3-383J4.2|Q6PI48	ENSG00000117593
PC	Pyruvate carboxylase, mitochondrial OS=Homo sapiens GN=PC PE=1 SV=2	2	2	5	12000000		26000000	24000000	15000000		6000000	16250000	2.70833	1.43741	0.312011	0.50583	7500000	19500000	1.25	3.25	0.321928	1.70044	3	FALSE	FALSE	TRUE	106	411	25.7908	Tmito	PCB|P11498	ENSG00000173599
PNPLA8	Calcium-independent phospholipase A2-gamma OS=Homo sapiens GN=PNPLA8 PE=1 SV=1	1	1	1						98000000	0	24500000	100	6.64386	0.391002	0.407821	49000000	0	100	0	6.64386		1	FALSE	FALSE	FALSE	0	411	0	Tmito	IPLA2(GAMMA)|IPLA2-2|IPLA2G|iPLA2gamma|Q9NP80	ENSG00000135241
MRPL32	39S ribosomal protein L32, mitochondrial OS=Homo sapiens GN=MRPL32 PE=1 SV=1	1	1	1			22000000				0	5500000	100	6.64386	0.391002	0.407821	0	0	0	0			1	FALSE	FALSE	FALSE	2	411	0.486618	Tmito	L32mt|MRP-L32|bMRP-59b|Q9BYC8	ENSG00000106591
ME2	NAD-dependent malic enzyme, mitochondrial OS=Homo sapiens GN=ME2 PE=1 SV=1	8	8	24	36000000	54000000	32000000	92000000	25000000	26000000	45000000	43750000	0.972222	-0.040642	0.949361	0.0225684	25500000	58500000	0.566667	1.3	-0.819428	0.378512	4	FALSE	TRUE	TRUE	20	411	4.86618	Tmito	ODS1|P23368	ENSG00000082212
TUFM	Elongation factor Tu, mitochondrial OS=Homo sapiens GN=TUFM PE=1 SV=2	23	23	298	730000000	490000000	710000000	870000000	680000000	600000000	610000000	715000000	1.17213	0.229134	0.536198	0.270674	640000000	775000000	1.04918	1.27049	0.0692627	0.345387	4	FALSE	TRUE	TRUE	139	411	33.82	Tmito	COXPD4|EF-TuMT|EFTU|P43|P49411	ENSG00000178952
TAMM41	Mitochondrial translocator assembly and maintenance protein 41 homolog OS=Homo sapiens GN=TAMM41 PE=1 SV=2	3	3	9	11000000	8300000	12000000	26000000	22000000	28000000	9650000	22000000	2.27979	1.1889	0.0353618	1.45147	25000000	24000000	2.59067	2.48705	1.37333	1.31443	4	TRUE	TRUE	TRUE	6	411	1.45985	Tmito	C3orf31|RAM41|TAM41|Q96BW9	ENSG00000144559
CHCHD4	Isoform 2 of Mitochondrial intermembrane space import and assembly protein 40 OS=Homo sapiens GN=CHCHD4	1	1	4		16000000	31000000	32000000		30000000	8000000	23250000	2.90625	1.53916	0.267335	0.572944	15000000	16000000	1.875	2	0.906891	1	3	FALSE	FALSE	FALSE	17	411	4.13625	Tmito	MIA40|TIMM40|Q8N4Q1	ENSG00000163528
NDUFAB1	Acyl carrier protein (Fragment) OS=Homo sapiens GN=NDUFAB1 PE=2 SV=1	1	3	18			170000000	260000000	260000000	310000000	0	250000000	100	6.64386	0.00333361	2.47709	285000000	260000000	100	100	6.64386	6.64386	4	TRUE	TRUE	TRUE	0	411	0	Tmito	ACP|FASN2A|SDAP|O14561	ENSG00000004779
NDUFAB1	Acyl carrier protein, mitochondrial OS=Homo sapiens GN=NDUFAB1 PE=1 SV=3	2	4	72	93000000	130000000	3500000000	10000000000	1600000000	3100000000	111500000	4550000000	40.8072	5.35075	0.097297	1.0119	2350000000	5800000000	21.0762	52.0179	4.39755	5.70094	4	FALSE	TRUE	TRUE	0	411	0	Tmito	ACP|FASN2A|SDAP|O14561	ENSG00000004779
COA5	Cytochrome c oxidase assembly factor 5 OS=Homo sapiens GN=COA5 PE=1 SV=1	1	1	4			24000000	25000000	12000000	16000000	0	19250000	100	6.64386	0.00877212	2.0569	14000000	18500000	100	100	6.64386	6.64386	4	TRUE	FALSE	FALSE	0	411	0	Tmito	6330578E17Rik|C2orf64|Pet191|Q86WW8	ENSG00000183513
NDUFS3	NADH dehydrogenase [ubiquinone] iron-sulfur protein 3, mitochondrial OS=Homo sapiens GN=NDUFS3 PE=1 SV=1	4	4	10	25000000	26000000		22000000	18000000	36000000	25500000	19000000	0.745098	-0.424498	0.4457	0.350958	27000000	20000000	1.05882	0.784314	0.0824622	-0.350497	3	FALSE	TRUE	TRUE	19	411	4.62287	Tmito	CI-30|O75489	ENSG00000213619
MRPS25	28S ribosomal protein S25, mitochondrial OS=Homo sapiens GN=MRPS25 PE=1 SV=1	1	1	2	26000000					23000000	13000000	5750000	0.442308	-1.17688	0.678312	0.168571	11500000	0	0.884615	0	-0.176878		1	FALSE	FALSE	FALSE	6	411	1.45985	Tmito	MRP-S25|RPMS25|P82663	ENSG00000131368
ACAD9	Acyl-CoA dehydrogenase family member 9, mitochondrial OS=Homo sapiens GN=ACAD9 PE=1 SV=1	10	10	30	24000000	17000000	37000000	68000000	34000000	43000000	20500000	45500000	2.21951	1.15024	0.0439087	1.35745	38500000	51000000	1.87805	2.4878	0.909235	1.31487	4	TRUE	TRUE	TRUE	11	411	2.6764	Tmito	NPD002|Q9H845	ENSG00000177646
ACOT13	Acyl-coenzyme A thioesterase 13 OS=Homo sapiens GN=ACOT13 PE=1 SV=1	3	3	8	150000000	50000000	120000000	140000000	51000000		100000000	77750000	0.7775	-0.363085	0.745998	0.127262	25500000	95500000	0.255	0.955	-1.97143	-0.0664274	3	FALSE	TRUE	TRUE	11	411	2.6764	Tpossible_mito	PNAS-27|THEM2|Q9NPJ3	ENSG00000112304
CPT1A	Carnitine O-palmitoyltransferase 1, liver isoform OS=Homo sapiens GN=CPT1A PE=1 SV=2	1	1	2			12000000	15000000			0	6750000	100	6.64386	0.185596	0.731432	0	7500000	0	100		6.64386	2	FALSE	FALSE	FALSE	8	411	1.94647	Tmito	CPT1|CPT1-L|L-CPT1|P50416	ENSG00000110090
DHRS4	Dehydrogenase/reductase SDR family member 4 OS=Homo sapiens GN=DHRS4 PE=1 SV=3	7	7	35	61000000	58000000	81000000	120000000	84000000	87000000	59500000	93000000	1.56303	0.644341	0.03283	1.48373	85500000	102000000	1.43697	1.71429	0.523035	0.777608	4	TRUE	TRUE	TRUE	3	411	0.729927	Tpossible_mito	CR|NRDR|PHCR|PSCD|SCAD-SRL|SDR-SRL|SDR25C1|SDR25C2|Q9BTZ2	ENSG00000157326
GBAS	Protein NipSnap homolog 2 OS=Homo sapiens GN=GBAS PE=1 SV=1	3	3	15	29000000	22000000	43000000	44000000	21000000	26000000	25500000	33500000	1.31373	0.393664	0.306619	0.513401	23500000	32500000	0.921569	1.27451	-0.117836	0.349942	4	FALSE	TRUE	TRUE	13	411	3.16302	Tmito	NIPSNAP2|O75323	ENSG00000146729
MRPS30	28S ribosomal protein S30, mitochondrial OS=Homo sapiens GN=MRPS30 PE=1 SV=2	1	1	6	18000000	14000000	15000000	20000000		20000000	16000000	13750000	0.859375	-0.21864	0.685145	0.164217	10000000	10000000	0.625	0.625	-0.678072	-0.678072	3	FALSE	FALSE	TRUE	14	411	3.40633	Tmito	MRP-S30|PAP|PDCD9|S30mt|Q9NP92	ENSG00000112996
SCO2	Protein SCO2 homolog, mitochondrial OS=Homo sapiens GN=SCO2 PE=1 SV=3	1	1	2					25000000	31000000	0	14000000	100	6.64386	0.185323	0.73207	28000000	12500000	100	100	6.64386	6.64386	2	FALSE	FALSE	FALSE	19	411	4.62287	Tmito	CEMCOX1|MYP6|SCO1L|O43819	ENSG00000130489
HSD17B10	3-hydroxyacyl-CoA dehydrogenase type-2 OS=Homo sapiens GN=HSD17B10 PE=1 SV=3	15	15	205	430000000	350000000	400000000	530000000	380000000	410000000	390000000	430000000	1.10256	0.140863	0.510585	0.291932	395000000	455000000	1.01282	1.16667	0.0183785	0.222392	4	FALSE	TRUE	TRUE	107	411	26.0341	Tmito	17b-HSD10|ABAD|CAMR|DUPXp11.22|ERAB|HADH2|HCD2|MHBD|MRPP2|MRX17|MRX31|MRXS10|SCHAD|SDR5C1|Q99714	ENSG00000072506
NARS2	Probable asparagine--tRNA ligase, mitochondrial OS=Homo sapiens GN=NARS2 PE=1 SV=3	2	2	2				7000000	8500000		0	3875000	100	6.64386	0.184657	0.733634	4250000	7750000	100	100	6.64386	6.64386	2	FALSE	FALSE	FALSE	5	411	1.21655	Tmito	SLM5|asnRS|Q96I59	ENSG00000137513
HRSP12	Ribonuclease UK114 (Fragment) OS=Homo sapiens GN=HRSP12 PE=4 SV=1	2	2	6		15000000	23000000	34000000	22000000	13000000	7500000	23000000	3.06667	1.61667	0.236161	0.626792	17500000	28000000	2.33333	3.73333	1.22239	1.90046	4	FALSE	FALSE	TRUE	1	411	0.243309	Tmito	P14.5|PSP|UK114|P52758	ENSG00000132541
SPR	Sepiapterin reductase OS=Homo sapiens GN=SPR PE=1 SV=1	1	1	3		32000000		9900000			16000000	2475000	0.154688	-2.69257	0.55169	0.258305	0	4950000	0	0.309375		-1.69257	1	FALSE	FALSE	FALSE	9	411	2.18978	Tpossible_mito	SDR38C1|P35270	ENSG00000116096
ZADH2	Zinc-binding alcohol dehydrogenase domain-containing protein 2 OS=Homo sapiens GN=ZADH2 PE=1 SV=1	1	1	4			35000000	44000000	32000000	24000000	0	33750000	100	6.64386	0.00383509	2.41622	28000000	38000000	100	100	6.64386	6.64386	4	TRUE	FALSE	FALSE	4	411	0.973236	Tpossible_mito	Q8N4Q0	ENSG00000180011
ALDH1B1	Aldehyde dehydrogenase X, mitochondrial OS=Homo sapiens GN=ALDH1B1 PE=1 SV=3	11	12	37	64000000	36000000	57000000	69000000	40000000	50000000	50000000	54000000	1.08	0.111031	0.826683	0.0826611	45000000	54500000	0.9	1.09	-0.152003	0.124328	4	FALSE	TRUE	TRUE	20	411	4.86618	Tmito	ALDH5|ALDHX|P30837	ENSG00000137124
CHCHD1	Coiled-coil-helix-coiled-coil-helix domain-containing protein 1 OS=Homo sapiens GN=CHCHD1 PE=1 SV=1	1	1	3	20000000	16000000				31000000	18000000	7750000	0.430556	-1.21573	0.281394	0.550685	15500000	0	0.861111	0	-0.215729		1	FALSE	FALSE	FALSE	26	411	6.32603	Tmito	C10orf34|C2360|MRP-S37|Q96BP2	ENSG00000172586
TIMM8A	Mitochondrial import inner membrane translocase subunit Tim8 A OS=Homo sapiens GN=TIMM8A PE=1 SV=1	3	3	21	78000000	45000000	58000000	86000000	50000000	61000000	61500000	63750000	1.03659	0.0518389	0.916541	0.037848	55500000	68000000	0.902439	1.10569	-0.148099	0.144948	4	FALSE	TRUE	TRUE	35	411	8.51582	Tmito	DDP|DDP1|DFN1|MTS|TIM8|O60220	ENSG00000126953
VDAC3	Voltage-dependent anion-selective channel protein 3 OS=Homo sapiens GN=VDAC3 PE=2 SV=1	1	2	10	36000000	150000000	47000000	110000000	43000000	54000000	93000000	63500000	0.682796	-0.550474	0.696119	0.157317	48500000	76500000	0.521505	0.822581	-0.939246	-0.281771	4	FALSE	FALSE	TRUE	46	411	11.1922	Tmito	HD-VDAC3|VDAC-3|Q9Y277	ENSG00000078668
IDE	Insulin-degrading enzyme OS=Homo sapiens GN=IDE PE=1 SV=4	3	3	4	38000000	30000000					34000000	0	0		0.0745537	1.12753	0	0	0	0			0	FALSE	TRUE	FALSE	17	411	4.13625	Tmito	INSULYSIN|P14735	ENSG00000119912
GSTK1	Glutathione S-transferase kappa 1 OS=Homo sapiens GN=GSTK1 PE=1 SV=3	6	6	26	67000000	55000000	72000000	100000000	61000000	73000000	61000000	76500000	1.2541	0.326651	0.20773	0.6825	67000000	80500000	1.09836	1.31967	0.135352	0.40018	4	FALSE	TRUE	TRUE	10	411	2.43309	Tmito	GST|GST 13-13|GST13|GST13-13|GSTK1-1|hGSTK1|Q9Y2Q3	ENSG00000197448
VARS2	Isoform 4 of Valine--tRNA ligase, mitochondrial OS=Homo sapiens GN=VARS2	1	1	4	12000000		12000000	14000000	11000000		6000000	9250000	1.54167	0.624491	0.689282	0.161603	5500000	12500000	0.916667	2.08333	-0.125531	1.05889	3	FALSE	FALSE	FALSE	0	411	0	Tmito	G7a|VARS2L|VARSL|Q5ST30	ENSG00000137411
HSPE1	10 kDa heat shock protein, mitochondrial OS=Homo sapiens GN=HSPE1 PE=1 SV=2	6	6	76	2400000000	1500000000	2500000000	2300000000	1400000000	1800000000	1950000000	2000000000	1.02564	0.0365259	0.93299	0.0301231	1600000000	1850000000	0.820513	0.948718	-0.285402	-0.0759489	4	FALSE	TRUE	TRUE	85	411	20.6813	Tmito	CPN10|EPF|GROES|HSP10|P61604	ENSG00000115541
MRPL54	39S ribosomal protein L54, mitochondrial OS=Homo sapiens GN=MRPL54 PE=1 SV=1	3	3	8		22000000	16000000	41000000	27000000	29000000	11000000	28250000	2.56818	1.36075	0.331668	0.479297	28000000	34000000	2.54545	3.09091	1.34792	1.62803	4	FALSE	TRUE	TRUE	14	411	3.40633	Tmito	L54mt|MRP-L54|Q6P161	ENSG00000183617
TRIAP1	TP53-regulated inhibitor of apoptosis 1 OS=Homo sapiens GN=TRIAP1 PE=1 SV=1	1	1	2			6000000		8900000		0	3725000	100	6.64386	0.193523	0.713268	4450000	4450000	100	100	6.64386	6.64386	2	FALSE	FALSE	FALSE	0	411	0	Tmito	MDM35|P53CSV|WF-1|O43715	ENSG00000170855
PTCD3	Pentatricopeptide repeat domain-containing protein 3, mitochondrial OS=Homo sapiens GN=PTCD3 PE=1 SV=3	3	3	5			28000000	51000000		40000000	0	29750000	100	6.64386	0.0730827	1.13619	20000000	25500000	100	100	6.64386	6.64386	3	FALSE	TRUE	TRUE	30	411	7.29927	Tmito	MRP-S39|Q96EY7	ENSG00000132300
AKAP1	A-kinase anchor protein 1, mitochondrial OS=Homo sapiens GN=AKAP1 PE=1 SV=1	2	2	3			11000000	17000000	9300000		0	9325000	100	6.64386	0.0770398	1.11328	4650000	13150000	100	100	6.64386	6.64386	3	FALSE	FALSE	FALSE	23	411	5.59611	Tmito	AKAP|AKAP121|AKAP149|AKAP84|D-AKAP1|PPP1R43|PRKA1|SAKAP84|TDRD17|Q92667	ENSG00000121057
AK2	Adenylate kinase 2, mitochondrial OS=Homo sapiens GN=AK2 PE=1 SV=2	11	11	89	320000000	250000000	300000000	310000000	240000000	250000000	285000000	275000000	0.964912	-0.0515303	0.828453	0.0817324	245000000	275000000	0.859649	0.964912	-0.21818	-0.0515303	4	FALSE	TRUE	TRUE	44	411	10.7056	Tmito	ADK2|AK 2|P54819	ENSG00000004455
C7orf55	UPF0562 protein C7orf55 OS=Homo sapiens GN=C7orf55 PE=1 SV=2	1	1	3			36000000	46000000		40000000	0	30500000	100	6.64386	0.0604838	1.21836	20000000	23000000	100	100	6.64386	6.64386	3	FALSE	FALSE	FALSE				Tmito	FMC1	ENSG00000164898
C7orf55	Isoform 2 of UPF0562 protein C7orf55 OS=Homo sapiens GN=C7orf55	5	8	45	75000000	71000000	70000000	62000000	54000000	68000000	73000000	63500000	0.869863	-0.20114	0.0821188	1.08556	61000000	58000000	0.835616	0.794521	-0.259087	-0.331844	4	FALSE	TRUE	TRUE				Tmito	FMC1	ENSG00000164898
SFXN1	Sideroflexin-1 OS=Homo sapiens GN=SFXN1 PE=1 SV=4	2	2	5	29000000	23000000		23000000		31000000	26000000	13500000	0.519231	-0.945552	0.22156	0.654508	15500000	11500000	0.596154	0.442308	-0.746243	-1.17688	2	FALSE	FALSE	TRUE	27	411	6.56934	Tmito	Q9H9B4	ENSG00000164466
GLRX5	Glutaredoxin-related protein 5, mitochondrial OS=Homo sapiens GN=GLRX5 PE=1 SV=2	3	3	25	84000000	69000000	89000000	66000000	63000000	67000000	76500000	71250000	0.931373	-0.10257	0.631563	0.199583	65000000	64500000	0.849673	0.843137	-0.23502	-0.246161	4	FALSE	TRUE	TRUE	4	411	0.973236	Tmito	C14orf87|FLB4739|GRX5|PR01238|PRO1238|Q86SX6	ENSG00000182512
MRPS11	28S ribosomal protein S11, mitochondrial OS=Homo sapiens GN=MRPS11 PE=1 SV=2	2	2	3			20000000	28000000			0	12000000	100	6.64386	0.19041	0.720309	0	14000000	0	100		6.64386	2	FALSE	FALSE	FALSE	7	411	1.70316	Tmito	HCC-2|P82912	ENSG00000181991
XPNPEP3	Probable Xaa-Pro aminopeptidase 3 OS=Homo sapiens GN=XPNPEP3 PE=1 SV=1	3	4	16	280000000	350000000	170000000	40000000	88000000	120000000	315000000	104500000	0.331746	-1.59185	0.0314146	1.50287	104000000	64000000	0.330159	0.203175	-1.59877	-2.29921	4	TRUE	TRUE	TRUE	39	411	9.48905	Tmito	APP3|NPHPL1|Q9NQH7	ENSG00000196236
PDP1	Isoform 2 of [Pyruvate dehydrogenase [acetyl-transferring]]-phosphatase 1, mitochondrial OS=Homo sapiens GN=PDP1	1	1	3		7200000	11000000	11000000			3600000	5500000	1.52778	0.611435	0.722125	0.141388	0	5500000	0	1.52778		0.611435	2	FALSE	FALSE	FALSE	0	411	0	Tmito	PDH|PDP|PDPC|PPM2C|Q9P0J1	ENSG00000164951
ECI1	Enoyl-CoA delta isomerase 1, mitochondrial OS=Homo sapiens GN=ECI1 PE=1 SV=1	9	9	25	75000000	55000000	64000000	97000000	53000000	51000000	65000000	66250000	1.01923	0.0274807	0.936882	0.0283151	52000000	75000000	0.8	1.15385	-0.321928	0.206451	4	FALSE	TRUE	TRUE	9	411	2.18978	Tmito	DCI|P42126	ENSG00000167969
C8orf82	UPF0598 protein C8orf82 (Fragment) OS=Homo sapiens GN=C8orf82 PE=4 SV=1	1	1	1		2200000					1100000	0	0		0.5	0.30103	0	0	0	0			0	FALSE	FALSE	FALSE				Tmito	Q6P1X6	ENSG00000213563
GRHPR	Glyoxylate reductase/hydroxypyruvate reductase OS=Homo sapiens GN=GRHPR PE=3 SV=1	1	1	5	58000000	130000000			75000000	30000000	94000000	26250000	0.279255	-1.84034	0.271369	0.56644	52500000	37500000	0.558511	0.398936	-0.840343	-1.32577	2	FALSE	FALSE	TRUE	6	411	1.45985	Tmito	GLXR|GLYD|PH2|Q9UBQ7	ENSG00000137106
ECHDC1	Ethylmalonyl-CoA decarboxylase (Fragment) OS=Homo sapiens GN=ECHDC1 PE=4 SV=1	1	1	3	130000000		27000000			46000000	65000000	18250000	0.280769	-1.83254	0.60194	0.220447	23000000	0	0.353846	0	-1.49881		2	FALSE	FALSE	FALSE	3	411	0.729927	Tnon_mito	HEL-S-76|MMCD|dJ351K20.2|Q9NTX5	ENSG00000093144
HARS2	Probable histidine--tRNA ligase, mitochondrial OS=Homo sapiens GN=HARS2 PE=1 SV=1	1	5	11						18000000	0	4500000	100	6.64386	0.391002	0.407821	9000000	0	100	0	6.64386		1	FALSE	TRUE	TRUE	21	411	5.10949	Tmito	HARSL|HARSR|HO3|PRLTS2|P49590	ENSG00000112855
NDUFA4	NADH dehydrogenase [ubiquinone] 1 alpha subcomplex subunit 4 OS=Homo sapiens GN=NDUFA4 PE=1 SV=1	2	2	10	42000000	33000000	39000000	41000000	52000000	53000000	37500000	46250000	1.23333	0.302563	0.2495	0.602929	52500000	46500000	1.4	1.24	0.485427	0.31034	4	FALSE	FALSE	TRUE	7	411	1.70316	Tmito	CI-9k|CI-MLRQ|MLRQ|O00483	ENSG00000189043
APOA1BP	NAD(P)H-hydrate epimerase OS=Homo sapiens GN=APOA1BP PE=1 SV=2	4	4	17	110000000	87000000	55000000	84000000	29000000	38000000	98500000	51500000	0.522843	-0.935551	0.0632602	1.19887	33500000	56500000	0.340102	0.573604	-1.55596	-0.801873	4	FALSE	TRUE	TRUE	5	411	1.21655	Tmito	AIBP|YJEFN1|Q8NCW5	ENSG00000163382
HSD17B4	Peroxisomal multifunctional enzyme type 2 OS=Homo sapiens GN=HSD17B4 PE=1 SV=3	26	26	211	310000000	330000000	370000000	600000000	420000000	290000000	320000000	420000000	1.3125	0.392317	0.225628	0.646608	355000000	510000000	1.10938	1.59375	0.149747	0.672425	4	FALSE	TRUE	TRUE	68	411	16.545	Tpossible_mito	DBP|MFE-2|MPF-2|PRLTS1|SDR8C1|P51659	ENSG00000133835
OAT	Ornithine aminotransferase, mitochondrial OS=Homo sapiens GN=OAT PE=1 SV=1	14	14	124	270000000	220000000	280000000	430000000	180000000	210000000	245000000	275000000	1.12245	0.16665	0.650036	0.187062	195000000	305000000	0.795918	1.2449	-0.329308	0.316027	4	FALSE	TRUE	TRUE	95	411	23.1144	Tmito	GACR|HOGA|OATASE|OKT|P04181	ENSG00000065154
MRPL50	39S ribosomal protein L50, mitochondrial OS=Homo sapiens GN=MRPL50 PE=1 SV=2	2	2	8	29000000	22000000	31000000	35000000	28000000	27000000	25500000	30250000	1.18627	0.246438	0.378917	0.421455	27500000	31500000	1.07843	1.23529	0.108934	0.304855	4	FALSE	FALSE	TRUE	2	411	0.486618	Tmito	MRP-L50|Q8N5N7	ENSG00000136897
AURKAIP1	Aurora kinase A-interacting protein OS=Homo sapiens GN=AURKAIP1 PE=1 SV=1	1	1	1			15000000				0	3750000	100	6.64386	0.391002	0.407821	0	0	0	0			1	FALSE	FALSE	FALSE	1	411	0.243309	Tmito	AIP|AKIP|MRP-S38|Q9NWT8	ENSG00000175756
SHMT2	Serine hydroxymethyltransferase, mitochondrial OS=Homo sapiens GN=SHMT2 PE=1 SV=3	18	19	128	270000000	230000000	170000000	340000000	200000000	220000000	250000000	232500000	0.93	-0.104697	0.700403	0.154652	210000000	270000000	0.84	1.08	-0.251539	0.111031	4	FALSE	TRUE	TRUE	101	411	24.5742	Tmito	GLYA|HEL-S-51e|SHMT|P34897	ENSG00000182199
MTHFD2	Bifunctional methylenetetrahydrofolate dehydrogenase/cyclohydrolase, mitochondrial OS=Homo sapiens GN=MTHFD2 PE=1 SV=2	6	6	27	130000000	130000000	140000000	200000000	64000000	59000000	130000000	115750000	0.890385	-0.167499	0.700442	0.154628	61500000	132000000	0.473077	1.01538	-1.07985	0.0220263	4	FALSE	TRUE	TRUE	29	411	7.05596	Tmito	NMDMC|P13995	ENSG00000065911
RMDN1	Regulator of microtubule dynamics protein 1 OS=Homo sapiens GN=RMDN1 PE=1 SV=1	3	3	9	36000000		40000000	41000000	30000000	26000000	18000000	34250000	1.90278	0.928107	0.529439	0.276184	28000000	35500000	1.55556	1.97222	0.63743	0.979822	4	FALSE	TRUE	TRUE	1	411	0.243309	Tmito	FAM82B|RMD-1|RMD1|Q96DB5	ENSG00000176623
RDH13	Retinol dehydrogenase 13 OS=Homo sapiens GN=RDH13 PE=1 SV=2	3	3	5			8200000	7900000		11000000	0	6775000	100	6.64386	0.0642491	1.19213	5500000	3950000	100	100	6.64386	6.64386	3	FALSE	TRUE	TRUE	5	411	1.21655	Tpossible_mito	SDR7C3|Q8NBN7	ENSG00000160439
GSR	Glutathione reductase, mitochondrial OS=Homo sapiens GN=GSR PE=1 SV=2	7	7	33	100000000	110000000	49000000	99000000	43000000	47000000	105000000	59500000	0.566667	-0.819428	0.0362549	1.44063	45000000	71000000	0.428571	0.67619	-1.22239	-0.564498	4	TRUE	TRUE	TRUE	13	411	3.16302	Tmito	HEL-75|P00390	ENSG00000104687
BCAT2	Branched-chain-amino-acid aminotransferase (Fragment) OS=Homo sapiens GN=BCAT2 PE=2 SV=1	1	1	4			52000000	57000000	37000000	42000000	0	47000000	100	6.64386	0.00195327	2.70924	39500000	47000000	100	100	6.64386	6.64386	4	TRUE	FALSE	FALSE	1	411	0.243309	Tmito	BCAM|BCATM|BCT2|PP18|O15382	ENSG00000105552
MRPS22	28S ribosomal protein S22, mitochondrial OS=Homo sapiens GN=MRPS22 PE=1 SV=1	6	6	9			32000000	47000000	38000000	31000000	0	37000000	100	6.64386	0.00208526	2.68084	34500000	42500000	100	100	6.64386	6.64386	4	TRUE	TRUE	TRUE	32	411	7.78589	Tmito	C3orf5|COXPD5|GIBT|MRP-S22|RPMS22|P82650	ENSG00000175110
LAP3	Cytosol aminopeptidase OS=Homo sapiens GN=LAP3 PE=1 SV=3	14	14	38	350000000	300000000	550000000	58000000	48000000	67000000	325000000	180750000	0.556154	-0.846444	0.328712	0.483184	57500000	53000000	0.176923	0.163077	-2.49881	-2.61638	4	FALSE	TRUE	TRUE	20	411	4.86618	Tmito	HEL-S-106|LAP|LAPEP|PEPS|P28838	ENSG00000002549
GLUD1	Glutamate dehydrogenase 1, mitochondrial OS=Homo sapiens GN=GLUD1 PE=1 SV=2	15	15	74	210000000	160000000	230000000	300000000	210000000	230000000	185000000	242500000	1.31081	0.390459	0.194444	0.711206	220000000	255000000	1.18919	1.37838	0.249978	0.462972	4	FALSE	TRUE	TRUE	90	411	21.8978	Tmito	GDH|GDH1|GLUD|P00367	ENSG00000148672
HMGCL	Hydroxymethylglutaryl-CoA lyase, mitochondrial OS=Homo sapiens GN=HMGCL PE=1 SV=2	4	4	7	26000000		28000000	33000000			13000000	15250000	1.17308	0.230298	0.899386	0.0460538	0	16500000	0	1.26923		0.343954	2	FALSE	TRUE	TRUE	1	411	0.243309	Tmito	HL|P35914	ENSG00000117305
MRPS33	28S ribosomal protein S33, mitochondrial OS=Homo sapiens GN=MRPS33 PE=1 SV=1	1	1	1			22000000				0	5500000	100	6.64386	0.391002	0.407821	0	0	0	0			1	FALSE	FALSE	FALSE	6	411	1.45985	Tmito	MRP-S33|PTD003|S33mt|Q9Y291	ENSG00000090263
NUBPL	Iron-sulfur protein NUBPL OS=Homo sapiens GN=NUBPL PE=1 SV=3	2	2	6			21000000	45000000	19000000	24000000	0	27250000	100	6.64386	0.0200353	1.6982	21500000	32000000	100	100	6.64386	6.64386	4	TRUE	FALSE	TRUE	2	411	0.486618	Tmito	C14orf127|IND1|huInd1|Q8TB37	ENSG00000151413
GADD45GIP1	Growth arrest and DNA damage-inducible proteins-interacting protein 1 OS=Homo sapiens GN=GADD45GIP1 PE=1 SV=1	1	1	1							0	0	100	6.64386			0	0	0	0			0		FALSE	FALSE	22	411	5.3528	Tmito	CKBBP2|CKbetaBP2|CRIF1|MRP-L59|PLINP|PLINP-1|PRG6|Plinp1|Q8TAE8	ENSG00000179271
TFAM	Transcription factor A, mitochondrial OS=Homo sapiens GN=TFAM PE=1 SV=1	1	1	5	46000000		47000000	49000000	35000000	39000000	23000000	42500000	1.84783	0.885829	0.550942	0.258894	37000000	42000000	1.6087	1.82609	0.685891	0.868755	4	FALSE	FALSE	TRUE	21	411	5.10949	Tmito	MTTF1|MTTFA|TCF6|TCF6L1|TCF6L2|TCF6L3|Q00059	ENSG00000108064
ALDH18A1	Delta-1-pyrroline-5-carboxylate synthase OS=Homo sapiens GN=ALDH18A1 PE=1 SV=2	27	27	172	160000000	160000000	190000000	280000000	260000000	190000000	160000000	230000000	1.4375	0.523562	0.0583721	1.23379	225000000	270000000	1.40625	1.6875	0.491853	0.754888	4	FALSE	TRUE	TRUE	93	411	22.6277	Tmito	ARCL3A|GSAS|P5CS|PYCS|P54886	ENSG00000059573
TARS2	Threonine--tRNA ligase, mitochondrial OS=Homo sapiens GN=TARS2 PE=1 SV=1	10	10	28	28000000	31000000	34000000	50000000	21000000	31000000	29500000	34000000	1.15254	0.20482	0.515313	0.287929	26000000	35500000	0.881356	1.20339	-0.182203	0.267104	4	FALSE	TRUE	TRUE	23	411	5.59611	Tmito	TARSL1|thrRS|Q9BW92	ENSG00000143374
TBRG4	Protein TBRG4 OS=Homo sapiens GN=TBRG4 PE=1 SV=1	10	10	35	56000000	40000000	62000000	93000000	46000000	53000000	48000000	63500000	1.32292	0.403722	0.306905	0.512996	49500000	69500000	1.03125	1.44792	0.0443941	0.533979	4	FALSE	TRUE	TRUE	9	411	2.18978	Tmito	CPR2|FASTKD4|Q969Z0	ENSG00000136270
PRDX5	Peroxiredoxin-5, mitochondrial OS=Homo sapiens GN=PRDX5 PE=1 SV=4	6	6	33	160000000	81000000	96000000	100000000	65000000	58000000	120500000	79750000	0.661826	-0.595477	0.483488	0.315614	61500000	82500000	0.510373	0.684647	-0.970375	-0.546567	4	FALSE	TRUE	TRUE	26	411	6.32603	Tmito	ACR1|AOEB166|B166|HEL-S-55|PLP|PMP20|PRDX6|PRXV|prx-V|P30044	ENSG00000126432
C2orf47	Uncharacterized protein C2orf47, mitochondrial OS=Homo sapiens GN=C2orf47 PE=1 SV=1	2	2	5		25000000	30000000	43000000			12500000	18250000	1.46	0.545968	0.754721	0.122214	0	21500000	0	1.72		0.782409	2	FALSE	FALSE	TRUE	12	411	2.91971	Tmito	Q8WWC4	ENSG00000162972
GLOD4	Glyoxalase domain-containing protein 4 OS=Homo sapiens GN=GLOD4 PE=1 SV=1	1	1	2	42000000	40000000					41000000	0	0		0.0155242	1.80899	0	0	0	0			0	TRUE	FALSE	FALSE	14	411	3.40633	Tmito	C17orf25|HC71|Q9HC38	ENSG00000167699
ACAA1	3-ketoacyl-CoA thiolase, peroxisomal OS=Homo sapiens GN=ACAA1 PE=1 SV=2	4	4	13	44000000	33000000	29000000	35000000	56000000	72000000	38500000	48000000	1.24675	0.318176	0.44797	0.348751	64000000	45500000	1.66234	1.18182	0.733213	0.241008	4	FALSE	TRUE	TRUE	4	411	0.973236	Tpossible_mito	ACAA|PTHIO|THIO|P09110	ENSG00000060971
PDPR	Pyruvate dehydrogenase phosphatase regulatory subunit, mitochondrial OS=Homo sapiens GN=PDPR PE=1 SV=2	1	1	1			15000000				0	3750000	100	6.64386	0.391002	0.407821	0	0	0	0			1	FALSE	FALSE	FALSE	2	411	0.486618	Tmito	PDP3|Q8NCN5	ENSG00000090857
NLN	Neurolysin, mitochondrial OS=Homo sapiens GN=NLN PE=1 SV=1	1	1	3		20000000	15000000	25000000			10000000	10000000	1	0	1	0	0	12500000	0	1.25		0.321928	2	FALSE	FALSE	FALSE	5	411	1.21655	Tmito	AGTBP|EP24.16|MEP|MOP|Q9BYT8	ENSG00000123213
GRPEL2	GrpE protein homolog 2, mitochondrial OS=Homo sapiens GN=GRPEL2 PE=1 SV=1	2	2	3			18000000	37000000			0	13750000	100	6.64386	0.217506	0.662529	0	18500000	0	100		6.64386	2	FALSE	FALSE	FALSE	4	411	0.973236	Tmito	Mt-GrpE#2|Q8TAA5	ENSG00000164284
ALDH7A1	Isoform 2 of Alpha-aminoadipic semialdehyde dehydrogenase OS=Homo sapiens GN=ALDH7A1	14	14	74	140000000	99000000	80000000	120000000	71000000	80000000	119500000	87750000	0.73431	-0.44554	0.331766	0.479168	75500000	95500000	0.631799	0.799163	-0.662462	-0.323438	4	FALSE	TRUE	TRUE	37	411	9.00243	Tmito	ATQ1|EPD|PDE|P49419	ENSG00000164904
CECR5	Cat eye syndrome critical region protein 5 OS=Homo sapiens GN=CECR5 PE=1 SV=1	7	7	25	55000000	45000000	50000000	67000000	55000000	39000000	50000000	52750000	1.055	0.077243	0.740659	0.130382	47000000	61000000	0.94	1.22	-0.0892673	0.286881	4	FALSE	TRUE	TRUE	12	411	2.91971	Tmito	Q9BXW7	ENSG00000069998
MRPL39	Isoform 2 of 39S ribosomal protein L39, mitochondrial OS=Homo sapiens GN=MRPL39	2	2	4	33000000			22000000	22000000	19000000	16500000	15750000	0.954545	-0.0671142	0.971487	0.012563	20500000	22000000	1.24242	1.33333	0.313158	0.415037	3	FALSE	FALSE	FALSE	25	411	6.08273	Tmito	C21orf92|L39mt|MRP-L5|MRPL5|PRED22|PRED66|RPML5|Q9NYK5	ENSG00000154719
FUNDC2	FUN14 domain-containing protein 2 OS=Homo sapiens GN=FUNDC2 PE=1 SV=2	1	1	1		21000000					10500000	0	0		0.5	0.30103	0	0	0	0			0	FALSE	FALSE	FALSE	0	411	0	Tpossible_mito	DC44|HCBP6|HCC3|PD03104|Q9BWH2	ENSG00000165775
LYPLA1	Acyl-protein thioesterase 1 OS=Homo sapiens GN=LYPLA1 PE=1 SV=1	2	2	7	21000000	24000000	20000000	27000000		11000000	22500000	14500000	0.644444	-0.633872	0.26731	0.572985	5500000	13500000	0.244444	0.6	-2.03242	-0.736966	3	FALSE	FALSE	TRUE	5	411	1.21655	Tpossible_mito	APT-1|APT1|LPL-I|LPL1|hAPT1|O75608	ENSG00000120992
YME1L1	ATP-dependent zinc metalloprotease YME1L1 OS=Homo sapiens GN=YME1L1 PE=1 SV=2	1	1	1			83000000				0	20750000	100	6.64386	0.391002	0.407821	0	0	0	0			1	FALSE	FALSE	FALSE	8	411	1.94647	Tmito	FTSH|MEG4|PAMP|YME1L|Q96TA2	ENSG00000136758
MMAB	Cob(I)yrinic acid a,c-diamide adenosyltransferase, mitochondrial OS=Homo sapiens GN=MMAB PE=1 SV=1	5	5	23	33000000	34000000	55000000	48000000	43000000	47000000	33500000	48250000	1.4403	0.526368	0.00831271	2.08026	45000000	45500000	1.34328	1.35821	0.425764	0.441705	4	TRUE	TRUE	TRUE	0	411	0	Tmito	ATR|cblB|cob|Q96EY8	ENSG00000139428
PPOX	Protoporphyrinogen oxidase OS=Homo sapiens GN=PPOX PE=1 SV=1	4	4	13	21000000	23000000	20000000	23000000	18000000	24000000	22000000	21250000	0.965909	-0.0500407	0.683223	0.165438	21000000	20500000	0.954545	0.931818	-0.0671142	-0.10188	4	FALSE	TRUE	TRUE	6	411	1.45985	Tmito	PPO|V290M|VP|P50336	ENSG00000143224
ABCD3	ATP-binding cassette sub-family D member 3 OS=Homo sapiens GN=ABCD3 PE=2 SV=1	2	2	7	40000000	31000000		39000000	30000000		35500000	17250000	0.485915	-1.04122	0.177689	0.750341	15000000	34500000	0.422535	0.971831	-1.24286	-0.0412227	2	FALSE	FALSE	TRUE	40	411	9.73236	Tmito	ABC43|PMP70|PXMP1|ZWS2|P28288	ENSG00000117528
MRPL45	39S ribosomal protein L45, mitochondrial OS=Homo sapiens GN=MRPL45 PE=1 SV=2	1	1	4			23000000	28000000	23000000	27000000	0	25250000	100	6.64386	0.000308473	3.51078	25000000	25500000	100	100	6.64386	6.64386	4	TRUE	FALSE	FALSE	14	411	3.40633	Tmito	L45mt|MRP-L45|B4DEF8	ENSG00000174100
ATPAF1	ATP synthase mitochondrial F1 complex assembly factor 1 OS=Homo sapiens GN=ATPAF1 PE=2 SV=1	5	5	7	39000000		26000000			27000000	19500000	13250000	0.679487	-0.557482	0.805519	0.0939242	13500000	0	0.692308	0	-0.530515		2	FALSE	TRUE	TRUE	3	411	0.729927	Tmito	ATP11|ATP11p|Q5TC12	ENSG00000123472
CPOX	Oxygen-dependent coproporphyrinogen-III oxidase, mitochondrial OS=Homo sapiens GN=CPOX PE=1 SV=3	10	10	40	91000000	77000000	65000000	130000000	72000000	66000000	84000000	83250000	0.991071	-0.0129391	0.967294	0.0144415	69000000	101000000	0.821429	1.20238	-0.283793	0.265894	4	FALSE	TRUE	TRUE	6	411	1.45985	Tmito	CPO|CPX|HCP|P36551	ENSG00000080819
DCAKD	Dephospho-CoA kinase domain-containing protein OS=Homo sapiens GN=DCAKD PE=1 SV=1	1	1	2			36000000			38000000	0	18500000	100	6.64386	0.181923	0.740113	19000000	0	100	0	6.64386		2	FALSE	FALSE	FALSE	2	411	0.486618	Tmito	Q8WVC6	ENSG00000172992
SLC16A1	Monocarboxylate transporter 1 OS=Homo sapiens GN=SLC16A1 PE=1 SV=3	2	2	7	16000000	45000000	35000000	27000000	35000000	44000000	30500000	35250000	1.15574	0.208814	0.799265	0.0973094	39500000	31000000	1.29508	1.01639	0.373043	0.023459	4	FALSE	FALSE	TRUE	47	411	11.4355	Tpossible_mito	HHF7|MCT|MCT1|P53985	ENSG00000155380
AASS	Alpha-aminoadipic semialdehyde synthase, mitochondrial OS=Homo sapiens GN=AASS PE=1 SV=1	4	4	4		31000000		7900000	31000000		15500000	9725000	0.627419	-0.672498	0.777995	0.109023	15500000	19450000	1	1.25484	0	0.327502	2	FALSE	TRUE	FALSE	9	411	2.18978	Tmito	LKR/SDH|LKRSDH|LORSDH|Q9UDR5	ENSG00000008311
DIABLO	Diablo homolog, mitochondrial OS=Homo sapiens GN=DIABLO PE=1 SV=1	8	8	45	100000000	36000000	150000000	150000000	130000000	130000000	68000000	140000000	2.05882	1.04182	0.257645	0.588978	130000000	140000000	1.91176	2.05882	0.934905	1.04182	4	FALSE	TRUE	TRUE	49	411	11.9221	Tmito	DFNA64|SMAC|Q9NR28	ENSG00000184047
TTC19	Tetratricopeptide repeat protein 19, mitochondrial OS=Homo sapiens GN=TTC19 PE=1 SV=4	2	2	5	46000000	26000000	16000000	19000000		46000000	36000000	20250000	0.5625	-0.830075	0.340892	0.467383	23000000	9500000	0.638889	0.263889	-0.646363	-1.922	3	FALSE	FALSE	TRUE	0	411	0	Tmito	2010204O13Rik|MC3DN2|Q6DKK2	ENSG00000011295
GCSH	Glycine cleavage system H protein, mitochondrial OS=Homo sapiens GN=GCSH PE=1 SV=2	3	3	10	92000000	30000000	77000000	73000000	54000000	66000000	61000000	67500000	1.10656	0.146078	0.868747	0.0611066	60000000	63500000	0.983607	1.04098	-0.0238467	0.0579473	4	FALSE	TRUE	TRUE	3	411	0.729927	Tmito	GCE|NKH|P23434	ENSG00000140905
TOMM6	Mitochondrial import receptor subunit TOM6 homolog OS=Homo sapiens GN=TOMM6 PE=1 SV=1	1	1	1						30000000	0	7500000	100	6.64386	0.391002	0.407821	15000000	0	100	0	6.64386		1	FALSE	FALSE	FALSE	0	411	0	Tmito	OBTP|Q96B49	ENSG00000124593
MACROD1	O-acetyl-ADP-ribose deacetylase MACROD1 OS=Homo sapiens GN=MACROD1 PE=1 SV=2	1	1	1		25000000					12500000	0	0		0.5	0.30103	0	0	0	0			0	FALSE	FALSE	FALSE	10	411	2.43309	Tmito	LRP16|Q9BQ69	ENSG00000133315
TST	Thiosulfate sulfurtransferase OS=Homo sapiens GN=TST PE=1 SV=4	2	2	2	46000000						23000000	0	0		0.5	0.30103	0	0	0	0			0	FALSE	FALSE	FALSE	3	411	0.729927	Tmito	RDS|Q16762	ENSG00000128311
SDR39U1	Epimerase family protein SDR39U1 OS=Homo sapiens GN=SDR39U1 PE=1 SV=2	1	1	1				29000000			0	7250000	100	6.64386	0.391002	0.407821	0	14500000	0	100		6.64386	1	FALSE	FALSE	FALSE	1	411	0.243309	Tnon_mito	C14orf124|HCDI|Q9NRG7	ENSG00000100445
SLC25A17	Peroxisomal membrane protein PMP34 OS=Homo sapiens GN=SLC25A17 PE=1 SV=1	1	1	3	15000000		10000000		9900000		7500000	4975000	0.663333	-0.592194	0.796037	0.0990667	4950000	4950000	0.66	0.66	-0.599462	-0.599462	2	FALSE	FALSE	FALSE	3	411	0.729927	Tpossible_mito	PMP34|O43808	ENSG00000100372
CHCHD5	Coiled-coil-helix-coiled-coil-helix domain-containing protein 5 OS=Homo sapiens GN=CHCHD5 PE=2 SV=1	1	1	1					23000000		0	5750000	100	6.64386	0.391002	0.407821	11500000	11500000	100	100	6.64386	6.64386	1	FALSE	FALSE	FALSE	0	411	0	Tmito	C2orf9|MIC14|Q9BSY4	ENSG00000125611
TOMM70A	Mitochondrial import receptor subunit TOM70 OS=Homo sapiens GN=TOMM70A PE=1 SV=1	1	1	1			23000000				0	5750000	100	6.64386	0.391002	0.407821	0	0	0	0			1	FALSE	FALSE	FALSE	7	411	1.70316	Tmito	O94826	ENSG00000154174
NIT1	Isoform 4 of Nitrilase homolog 1 OS=Homo sapiens GN=NIT1	1	1	1	24000000						12000000	0	0		0.5	0.30103	0	0	0	0			0	FALSE	FALSE	FALSE	0	411	0	Tmito	Q86X76	ENSG00000158793
FAHD1	Isoform 3 of Acylpyruvase FAHD1, mitochondrial OS=Homo sapiens GN=FAHD1	2	2	5	34000000		33000000	38000000	26000000		17000000	24250000	1.42647	0.51245	0.74902	0.125507	13000000	32000000	0.764706	1.88235	-0.387023	0.912537	3	FALSE	FALSE	TRUE	2	411	0.486618	Tmito	C16orf36|YISKL|Q6P587	ENSG00000180185
MDH1	Isoform 3 of Malate dehydrogenase, cytoplasmic OS=Homo sapiens GN=MDH1	9	9	56	260000000	150000000	65000000	78000000	62000000	81000000	205000000	71500000	0.34878	-1.51961	0.246709	0.607816	71500000	70000000	0.34878	0.341463	-1.51961	-1.5502	4	FALSE	TRUE	TRUE	31	411	7.54258	Tpossible_mito	HEL-S-32|MDH-s|MDHA|MGC:1375|MOR2|P40925	ENSG00000014641
MRPS31	28S ribosomal protein S31, mitochondrial OS=Homo sapiens GN=MRPS31 PE=1 SV=3	1	1	2			27000000			13000000	0	10000000	100	6.64386	0.218398	0.660751	6500000	0	100	0	6.64386		2	FALSE	FALSE	FALSE	31	411	7.54258	Tmito	IMOGN38|MRP-S31|S31mt|Q92665	ENSG00000102738
HADHB	Trifunctional enzyme subunit beta, mitochondrial OS=Homo sapiens GN=HADHB PE=1 SV=3	12	12	60	160000000	94000000	110000000	140000000	110000000	130000000	127000000	122500000	0.964567	-0.0520467	0.914233	0.0389429	120000000	125000000	0.944882	0.984252	-0.0817941	-0.0229004	4	FALSE	TRUE	TRUE	47	411	11.4355	Tmito	ECHB|MTPB|TP-BETA|P55084	ENSG00000138029
GLYCTK	Glycerate kinase OS=Homo sapiens GN=GLYCTK PE=1 SV=1	1	1	1					870000000		0	217500000	100	6.64386	0.391002	0.407821	435000000	435000000	100	100	6.64386	6.64386	1	FALSE	FALSE	FALSE	1	411	0.243309	Tpossible_mito	HBEBP2|HBEBP4|HBeAgBP4A|Q8IVS8	ENSG00000168237
AARS2	Alanine--tRNA ligase, mitochondrial OS=Homo sapiens GN=AARS2 PE=1 SV=1	9	9	29	21000000		41000000	46000000	30000000	34000000	10500000	37750000	3.59524	1.84609	0.205556	0.687071	32000000	38000000	3.04762	3.61905	1.60768	1.85561	4	FALSE	TRUE	TRUE	12	411	2.91971	Tmito	AARSL|COXPD8|MT-ALARS|MTALARS|Q5JTZ9	ENSG00000124608
CHCHD2	Coiled-coil-helix-coiled-coil-helix domain-containing protein 2, mitochondrial OS=Homo sapiens GN=CHCHD2 PE=1 SV=1	3	3	42	260000000	120000000	200000000	220000000	210000000	270000000	190000000	225000000	1.18421	0.243926	0.704877	0.151887	240000000	215000000	1.26316	1.13158	0.337035	0.178337	4	FALSE	TRUE	TRUE	35	411	8.51582	Tmito	C7orf17|Q9Y6H1	ENSG00000106153
ELAC2	Zinc phosphodiesterase ELAC protein 2 OS=Homo sapiens GN=ELAC2 PE=1 SV=2	4	4	8	32000000	46000000	23000000	37000000	25000000	22000000	39000000	26750000	0.685897	-0.543935	0.293687	0.532116	23500000	31000000	0.602564	0.794872	-0.730813	-0.331206	4	FALSE	TRUE	TRUE	16	411	3.89294	Tmito	COXPD17|ELC2|HPC2|Q9BQ52	ENSG00000006744
GPX1	Glutathione peroxidase 1 OS=Homo sapiens GN=GPX1 PE=1 SV=4	2	2	2	31000000	7900000					19450000	0	0		0.341146	0.46706	0	0	0	0			0	FALSE	FALSE	FALSE	22	411	5.3528	Tmito	GPXD|GSHPX1|P07203	ENSG00000233276
FIS1	Mitochondrial fission 1 protein OS=Homo sapiens GN=FIS1 PE=1 SV=2	3	3	16	27000000	33000000	32000000	33000000	19000000	40000000	30000000	31000000	1.03333	0.0473057	0.859943	0.0655301	29500000	26000000	0.983333	0.866667	-0.0242475	-0.206451	4	FALSE	TRUE	TRUE	2	411	0.486618	Tmito	TTC11|Q9Y3D6	ENSG00000214253
ACLY	ATP-citrate synthase OS=Homo sapiens GN=ACLY PE=1 SV=3	30	30	134	240000000	290000000	300000000	380000000	200000000	140000000	265000000	255000000	0.962264	-0.0554951	0.873275	0.0588489	170000000	290000000	0.641509	1.09434	-0.640458	0.130061	4	FALSE	TRUE	TRUE	118	411	28.7105	Tmito	ACL|ATPCL|CLATP|P53396	ENSG00000131473
FLAD1	FAD synthase OS=Homo sapiens GN=FLAD1 PE=1 SV=1	1	1	1				35000000			0	8750000	100	6.64386	0.391002	0.407821	0	17500000	0	100		6.64386	1	FALSE	FALSE	FALSE	5	411	1.21655	Tmito	FAD1|FADS|RP11-307C12.7|Q8NFF5	ENSG00000160688
PCK2	Phosphoenolpyruvate carboxykinase [GTP], mitochondrial OS=Homo sapiens GN=PCK2 PE=1 SV=3	1	1	1		30000000					15000000	0	0		0.5	0.30103	0	0	0	0			0	FALSE	FALSE	FALSE	5	411	1.21655	Tmito	PEPCK|PEPCK-M|PEPCK2|Q16822	ENSG00000100889
NADK2	NAD kinase 2, mitochondrial OS=Homo sapiens GN=NADK2 PE=1 SV=2	3	3	5			46000000	79000000	37000000		0	40500000	100	6.64386	0.0881889	1.05459	18500000	58000000	100	100	6.64386	6.64386	3	FALSE	TRUE	TRUE	9	411	2.18978	Tmito	C5orf33|MNADK|NADKD1|Q4G0N4	ENSG00000152620
HK2	Hexokinase-2 OS=Homo sapiens GN=HK2 PE=1 SV=2	1	1	3	8800000		8600000		7100000		4400000	3925000	0.892045	-0.164811	0.934435	0.0294508	3550000	3550000	0.806818	0.806818	-0.309684	-0.309684	2	FALSE	FALSE	FALSE	9	411	2.18978	Tmito	HKII|HXK2|P52789	ENSG00000159399
MPST	3-mercaptopyruvate sulfurtransferase OS=Homo sapiens GN=MPST PE=4 SV=1	3	3	15	39000000	46000000	34000000	39000000	20000000	22000000	42500000	28750000	0.676471	-0.563901	0.080929	1.0919	21000000	29500000	0.494118	0.694118	-1.01707	-0.526748	4	FALSE	TRUE	TRUE	8	411	1.94647	Tmito	MST|TST2|P25325	ENSG00000128309
ACACA	Isoform 4 of Acetyl-CoA carboxylase 1 OS=Homo sapiens GN=ACACA	3	3	4	28000000		16000000	21000000			14000000	9250000	0.660714	-0.597902	0.794649	0.0998248	0	10500000	0	0.75		-0.415037	2	FALSE	TRUE	FALSE	86	411	20.9246	Tpossible_mito	ACAC|ACACAD|ACC|ACC1|ACCA|Q13085	ENSG00000132142
ABAT	4-aminobutyrate aminotransferase, mitochondrial OS=Homo sapiens GN=ABAT PE=2 SV=1	3	3	3		17000000		12000000			8500000	3000000	0.352941	-1.5025	0.633366	0.198345	0	6000000	0	0.705882		-0.5025	1	FALSE	TRUE	FALSE	1	411	0.243309	Tmito	GABA-AT|GABAT|NPD009|P80404	ENSG00000183044
ALDH5A1	Isoform 2 of Succinate-semialdehyde dehydrogenase, mitochondrial OS=Homo sapiens GN=ALDH5A1	5	5	18	54000000	36000000	34000000	50000000	40000000	25000000	45000000	37250000	0.827778	-0.272685	0.544788	0.263772	32500000	45000000	0.722222	1	-0.469485	0	4	FALSE	TRUE	TRUE	18	411	4.37956	Tmito	SSADH|SSDH|P51649	ENSG00000112294
CKMT1A	Creatine kinase U-type, mitochondrial OS=Homo sapiens GN=CKMT1A PE=1 SV=1	13	13	84	400000000	300000000	260000000	400000000	280000000	280000000	350000000	305000000	0.871429	-0.198546	0.531863	0.2742	280000000	340000000	0.8	0.971429	-0.321928	-0.0418202	4	FALSE	TRUE	TRUE	19	411	4.62287	Tmito	CKMT1	ENSG00000223572
FAM136A	Protein FAM136A OS=Homo sapiens GN=FAM136A PE=2 SV=1	3	3	6	49000000	54000000	72000000	78000000			51500000	37500000	0.728155	-0.457682	0.565854	0.247296	0	39000000	0	0.757282		-0.401098	2	FALSE	TRUE	TRUE	5	411	1.21655	Tmito	Q96C01	ENSG00000035141
TOMM5	Mitochondrial import receptor subunit TOM5 homolog OS=Homo sapiens GN=TOMM5 PE=4 SV=1	1	1	1				8300000			0	2075000	100	6.64386	0.391002	0.407821	0	4150000	0	100		6.64386	1	FALSE	FALSE	FALSE	0	411	0	Tmito	C9orf105|RP11-263I4.1|Tom5|bA613M10.3|Q8N4H5	ENSG00000175768
HTRA2	Serine protease HTRA2, mitochondrial OS=Homo sapiens GN=HTRA2 PE=1 SV=2	1	1	1						50000000	0	12500000	100	6.64386	0.391002	0.407821	25000000	0	100	0	6.64386		1	FALSE	FALSE	FALSE	2	411	0.486618	Tmito	OMI|PARK13|PRSS25|O43464	ENSG00000115317
GPI	Glucose-6-phosphate isomerase OS=Homo sapiens GN=GPI PE=1 SV=4	12	12	45	170000000	140000000	61000000	88000000	52000000	58000000	155000000	64750000	0.417742	-1.25932	0.0528534	1.27693	55000000	70000000	0.354839	0.451613	-1.49476	-1.14684	4	FALSE	TRUE	TRUE	61	411	14.8418	Tnon_mito	AMF|GNPI|NLK|PGI|PHI|SA-36|SA36|P06744	ENSG00000105220
GUK1	Guanylate kinase (Fragment) OS=Homo sapiens GN=GUK1 PE=2 SV=1	1	1	1		24000000					12000000	0	0		0.5	0.30103	0	0	0	0			0	FALSE	FALSE	FALSE	2	411	0.486618	Tmito	GMK|Q16774	ENSG00000143774
NDUFAF2	Mimitin, mitochondrial OS=Homo sapiens GN=NDUFAF2 PE=1 SV=1	2	2	15	44000000	38000000	32000000	37000000	30000000	38000000	41000000	34250000	0.835366	-0.25952	0.206221	0.685667	34000000	33500000	0.829268	0.817073	-0.270089	-0.291463	4	FALSE	FALSE	TRUE	2	411	0.486618	Tmito	B17.2L|MMTN|NDUFA12L|mimitin|Q8N183	ENSG00000164182
ALDH3A2	Isoform 2 of Fatty aldehyde dehydrogenase OS=Homo sapiens GN=ALDH3A2	10	10	33	110000000	55000000	75000000	95000000	72000000	96000000	82500000	84500000	1.02424	0.0345572	0.954089	0.020411	84000000	83500000	1.01818	1.01212	0.0259952	0.0173821	4	FALSE	TRUE	TRUE	29	411	7.05596	Tpossible_mito	ALDH10|FALDH|SLS|P51648	ENSG00000072210
ABHD10	Mycophenolic acid acyl-glucuronide esterase, mitochondrial OS=Homo sapiens GN=ABHD10 PE=1 SV=1	5	5	19	52000000	42000000	43000000	41000000	44000000	32000000	47000000	40000000	0.851064	-0.232661	0.366797	0.435574	38000000	42500000	0.808511	0.904255	-0.306661	-0.145198	4	FALSE	TRUE	TRUE	7	411	1.70316	Tmito	Q9NUJ1	ENSG00000144827
HINT3	Histidine triad nucleotide-binding protein 3 OS=Homo sapiens GN=HINT3 PE=1 SV=1	1	1	2			22000000	24000000			0	11500000	100	6.64386	0.182291	0.739234	0	12000000	0	100		6.64386	2	FALSE	FALSE	FALSE	1	411	0.243309	Tpossible_mito	HINT4|Q9NQE9	ENSG00000111911
CYB5B	Cytochrome b5 type B OS=Homo sapiens GN=CYB5B PE=3 SV=1	3	3	27	210000000	130000000	140000000	220000000	160000000	140000000	170000000	165000000	0.970588	-0.0430687	0.923475	0.034575	150000000	190000000	0.882353	1.11765	-0.180572	0.160465	4	FALSE	TRUE	TRUE	8	411	1.94647	Tmito	CYB5-M|CYPB5M|OMB5|RP11-140H17.1|O43169	ENSG00000103018
GRSF1	G-rich sequence factor 1 OS=Homo sapiens GN=GRSF1 PE=1 SV=3	7	7	28	59000000	62000000	73000000	73000000	59000000	56000000	60500000	65250000	1.07851	0.109043	0.380992	0.419084	57500000	66000000	0.950413	1.09091	-0.0733732	0.125531	4	FALSE	TRUE	TRUE	25	411	6.08273	Tmito	Q12849	ENSG00000132463
MRPS18B	28S ribosomal protein S18b, mitochondrial OS=Homo sapiens GN=MRPS18B PE=1 SV=1	4	4	16		27000000	45000000	47000000	34000000	41000000	13500000	41750000	3.09259	1.62882	0.27258	0.564506	37500000	40500000	2.77778	3	1.47393	1.58496	4	FALSE	TRUE	TRUE	27	411	6.56934	Tmito	C6orf14|HSPC183|HumanS18a|MRP-S18-2|MRPS18-2|PTD017|S18amt|Q9Y676	ENSG00000203624
CAT	Catalase OS=Homo sapiens GN=CAT PE=1 SV=3	10	10	38	64000000	41000000	60000000	67000000	48000000	56000000	52500000	57750000	1.1	0.137504	0.72882	0.13738	52000000	57500000	0.990476	1.09524	-0.0138058	0.131245	4	FALSE	TRUE	TRUE	37	411	9.00243	Tpossible_mito	P04040	ENSG00000121691
ACOT9	Isoform 4 of Acyl-coenzyme A thioesterase 9, mitochondrial OS=Homo sapiens GN=ACOT9	3	3	9	17000000	16000000	17000000	30000000	11000000	12000000	16500000	17500000	1.06061	0.0848889	0.834365	0.0786441	11500000	20500000	0.69697	1.24242	-0.520832	0.313158	4	FALSE	TRUE	TRUE	16	411	3.89294	Tmito	ACATE2|MT-ACT48|MTACT48|Q9Y305	ENSG00000123130
STARD7	StAR-related lipid transfer protein 7, mitochondrial OS=Homo sapiens GN=STARD7 PE=1 SV=2	1	1	1					15000000		0	3750000	100	6.64386	0.391002	0.407821	7500000	7500000	100	100	6.64386	6.64386	1	FALSE	FALSE	FALSE	0	411	0	Tmito	GTT1|Q9NQZ5	ENSG00000084090
AKR7A2	Aflatoxin B1 aldehyde reductase member 2 OS=Homo sapiens GN=AKR7A2 PE=1 SV=3	3	3	13	60000000	44000000	32000000	31000000	28000000	22000000	52000000	28250000	0.543269	-0.880261	0.185379	0.73194	25000000	29500000	0.480769	0.567308	-1.05658	-0.817797	4	FALSE	TRUE	TRUE	10	411	2.43309	Tmito	AFAR|AFAR1|AFB1-AR1|AKR7|O43488	ENSG00000053371
DUT	Isoform 2 of Deoxyuridine 5'-triphosphate nucleotidohydrolase, mitochondrial OS=Homo sapiens GN=DUT	6	6	27	86000000	71000000	33000000	42000000	39000000	34000000	78500000	37000000	0.471338	-1.08517	0.0931281	1.03092	36500000	40500000	0.464968	0.515924	-1.1048	-0.954771	4	FALSE	TRUE	TRUE	55	411	13.382	Tmito	dUTPase|P33316	ENSG00000128951
KIAA0100	UPF0378 protein KIAA0100 OS=Homo sapiens GN=KIAA0100 PE=1 SV=3	1	1	6		5200000	8500000	8200000	7600000	9800000	2600000	8525000	3.27885	1.71319	0.254758	0.593873	8700000	7900000	3.34615	3.03846	1.7425	1.60334	4	FALSE	FALSE	TRUE	0	411	0	Tnon_mito	BCOX|BCOX1|CT101|Q14667	ENSG00000007202
NME4	Nucleoside diphosphate kinase, mitochondrial (Fragment) OS=Homo sapiens GN=NME4 PE=3 SV=1	1	4	17						110000000	0	27500000	100	6.64386	0.391002	0.407821	55000000	0	100	0	6.64386		1	FALSE	TRUE	TRUE	12	411	2.91971	Tmito	NDPK-D|NM23H4|nm23-H4|O00746	ENSG00000103202
NME4	Nucleoside diphosphate kinase OS=Homo sapiens GN=NME4 PE=2 SV=1	1	4	26	76000000	63000000	120000000	120000000	88000000	120000000	69500000	112000000	1.61151	0.688414	0.0182249	1.73934	104000000	104000000	1.4964	1.4964	0.581499	0.581499	4	TRUE	TRUE	TRUE	12	411	2.91971	Tmito	NDPK-D|NM23H4|nm23-H4|O00746	ENSG00000103202
MTHFS	5-formyltetrahydrofolate cyclo-ligase OS=Homo sapiens GN=MTHFS PE=1 SV=2	1	1	3	52000000		36000000	60000000			26000000	24000000	0.923077	-0.115477	0.95369	0.0205929	0	30000000	0	1.15385		0.206451	2	FALSE	FALSE	FALSE	1	411	0.243309	Tnon_mito	HsT19268|P49914	ENSG00000136371
IDH1	Isocitrate dehydrogenase [NADP] cytoplasmic OS=Homo sapiens GN=IDH1 PE=1 SV=2	3	3	4	25000000	13000000					19000000	0	0		0.194729	0.71057	0	0	0	0			0	FALSE	TRUE	FALSE	22	411	5.3528	Tpossible_mito	HEL-216|HEL-S-26|IDCD|IDH|IDP|IDPC|PICD|O75874	ENSG00000138413
MICU2	Calcium uptake protein 2, mitochondrial OS=Homo sapiens GN=MICU2 PE=1 SV=2	2	2	3		20000000	22000000				10000000	5500000	0.55	-0.862496	0.738452	0.131678	0	0	0	0			1	FALSE	FALSE	FALSE	3	411	0.729927	Tmito	1110008L20Rik|EFHA1|Q8IYU8	ENSG00000165487
PRDX6	Peroxiredoxin-6 OS=Homo sapiens GN=PRDX6 PE=1 SV=3	12	12	63	300000000	220000000	110000000	140000000	84000000	78000000	260000000	103000000	0.396154	-1.33587	0.126566	0.897684	81000000	112000000	0.311538	0.430769	-1.68252	-1.21501	4	FALSE	TRUE	TRUE	158	411	38.4428	Tpossible_mito	1-Cys|AOP2|HEL-S-128m|NSGPx|PRX|aiPLA2|p29|P30041	ENSG00000117592
TKT	Isoform 2 of Transketolase OS=Homo sapiens GN=TKT	11	11	83	310000000	270000000	120000000	200000000	97000000	110000000	290000000	131750000	0.45431	-1.13825	0.0100155	1.99933	103500000	148500000	0.356897	0.512069	-1.48642	-0.96559	4	TRUE	TRUE	TRUE	51	411	12.4088	Tnon_mito	HEL107|TK|TKT1|P29401	ENSG00000163931
NIPSNAP1	Protein NipSnap homolog 1 OS=Homo sapiens GN=NIPSNAP1 PE=1 SV=1	7	7	39	130000000	160000000	140000000	310000000	190000000	130000000	145000000	192500000	1.32759	0.408806	0.345892	0.46106	160000000	250000000	1.10345	1.72414	0.142019	0.785875	4	FALSE	TRUE	TRUE	14	411	3.40633	Tmito	Q9BPW8	ENSG00000184117
GARS	Glycine--tRNA ligase OS=Homo sapiens GN=GARS PE=1 SV=3	12	12	52	100000000	81000000	39000000	48000000	37000000	38000000	90500000	40500000	0.447514	-1.16	0.10062	0.997316	37500000	42500000	0.414365	0.469613	-1.27103	-1.09045	4	FALSE	TRUE	TRUE	50	411	12.1655	Tpossible_mito	CMT2D|DSMAV|GlyRS|HMN5|SMAD1|P41250	ENSG00000106105
PUS1	tRNA pseudouridine synthase A, mitochondrial OS=Homo sapiens GN=PUS1 PE=1 SV=3	2	2	7	23000000	20000000	11000000	13000000		9300000	21500000	8325000	0.387209	-1.36881	0.0155444	1.80843	4650000	6500000	0.216279	0.302326	-2.20903	-1.72583	3	TRUE	FALSE	TRUE	10	411	2.43309	Tmito	MLASA1|Q9Y606	ENSG00000177192
GOT2	Aspartate aminotransferase, mitochondrial OS=Homo sapiens GN=GOT2 PE=1 SV=3	18	18	104	510000000	550000000	320000000	460000000	330000000	380000000	530000000	372500000	0.70283	-0.508752	0.0141218	1.85011	355000000	395000000	0.669811	0.745283	-0.578173	-0.42414	4	TRUE	TRUE	TRUE	24	411	5.83942	Tmito	KAT4|KATIV|mitAAT|P00505	ENSG00000125166
PTRH2	Peptidyl-tRNA hydrolase 2, mitochondrial OS=Homo sapiens GN=PTRH2 PE=2 SV=1	4	4	21	45000000	49000000	52000000	72000000	56000000	62000000	47000000	60500000	1.28723	0.364274	0.0495021	1.30538	59000000	64000000	1.25532	1.3617	0.328054	0.445411	4	TRUE	TRUE	TRUE	8	411	1.94647	Tmito	BIT1|PTH2|Q9Y3E5	ENSG00000141378
GSTO1	Glutathione S-transferase omega-1 OS=Homo sapiens GN=GSTO1 PE=1 SV=2	6	6	9	89000000	42000000	32000000		23000000		65500000	13750000	0.209924	-2.25206	0.244063	0.612498	11500000	11500000	0.175573	0.175573	-2.50986	-2.50986	2	FALSE	TRUE	TRUE	19	411	4.62287	Tnon_mito	GSTO 1-1|GSTTLp28|HEL-S-21|P28|SPG-R|P78417	ENSG00000148834
TMEM205	Transmembrane protein 205 OS=Homo sapiens GN=TMEM205 PE=1 SV=1	1	1	3	55000000		53000000		44000000		27500000	24250000	0.881818	-0.181447	0.928169	0.0323729	22000000	22000000	0.8	0.8	-0.321928	-0.321928	2	FALSE	FALSE	FALSE	1	411	0.243309	Tpossible_mito	UNQ501|Q6UW68	ENSG00000105518
MGST1	Microsomal glutathione S-transferase 1 OS=Homo sapiens GN=MGST1 PE=1 SV=1	1	1	7	93000000	46000000	63000000	63000000	61000000	71000000	69500000	64500000	0.928058	-0.107714	0.866643	0.0621596	66000000	62000000	0.94964	0.892086	-0.074547	-0.164745	4	FALSE	FALSE	TRUE	0	411	0	Tpossible_mito	GST12|MGST|MGST-I|P10620	ENSG00000008394
COA4	Cytochrome c oxidase assembly factor 4 homolog, mitochondrial OS=Homo sapiens GN=COA4 PE=1 SV=2	2	2	14	56000000	59000000	79000000	120000000	64000000	58000000	57500000	80250000	1.39565	0.480939	0.201743	0.695202	61000000	92000000	1.06087	1.6	0.0852473	0.678072	4	FALSE	FALSE	TRUE	0	411	0	Tpossible_mito	CHCHD8|CMC3|E2IG2|Q9NYJ1	ENSG00000181924
BAX	Isoform Beta of Apoptosis regulator BAX OS=Homo sapiens GN=BAX	2	2	8			21000000	26000000	20000000	34000000	0	25250000	100	6.64386	0.0042356	2.37309	27000000	23000000	100	100	6.64386	6.64386	4	TRUE	FALSE	TRUE	9	411	2.18978	Tmito	BCL2L4|Q07812	ENSG00000087088
MAVS	Mitochondrial antiviral-signaling protein OS=Homo sapiens GN=MAVS PE=1 SV=2	1	1	7	15000000		20000000	20000000	20000000	22000000	7500000	20500000	2.73333	1.45066	0.332103	0.478727	21000000	20000000	2.8	2.66667	1.48543	1.41504	4	FALSE	FALSE	TRUE	11	411	2.6764	Tmito	CARDIF|IPS-1|IPS1|VISA|Q7Z434	ENSG00000088888
ARG2	Arginase-2, mitochondrial OS=Homo sapiens GN=ARG2 PE=1 SV=1	4	4	8		36000000	29000000	63000000	40000000	35000000	18000000	41750000	2.31944	1.21378	0.393296	0.40528	37500000	51500000	2.08333	2.86111	1.05889	1.51658	4	FALSE	TRUE	TRUE	0	411	0	Tmito	P78540	ENSG00000081181
MTPAP	Isoform 2 of Poly(A) RNA polymerase, mitochondrial OS=Homo sapiens GN=MTPAP	1	2	2						8700000	0	2175000	100	6.64386	0.391002	0.407821	4350000	0	100	0	6.64386		1	FALSE	FALSE	FALSE	12	411	2.91971	Tmito	PAPD1|SPAX4|Q9NVV4	ENSG00000107951
CCDC51	Coiled-coil domain-containing protein 51 OS=Homo sapiens GN=CCDC51 PE=1 SV=2	1	1	1				13000000			0	3250000	100	6.64386	0.391002	0.407821	0	6500000	0	100		6.64386	1	FALSE	FALSE	FALSE	0	411	0	Tmito	Q96ER9	ENSG00000164051
DNM1L	Isoform 6 of Dynamin-1-like protein OS=Homo sapiens GN=DNM1L	3	3	3	22000000	23000000					22500000	0	0		0.0141448	1.8494	0	0	0	0			0	TRUE	TRUE	FALSE	35	411	8.51582	Tmito	DLP1|DRP1|DVLP|DYMPLE|EMPF|HDYNIV|O00429	ENSG00000087470
NRD1	Nardilysin OS=Homo sapiens GN=NRD1 PE=3 SV=1	1	1	1	35000000						17500000	0	0		0.5	0.30103	0	0	0	0			0	FALSE	FALSE	FALSE	8	411	1.94647	Tpossible_mito	hNRD1|hNRD2|O43847	ENSG00000078618
CISD2	CDGSH iron-sulfur domain-containing protein 2 OS=Homo sapiens GN=CISD2 PE=2 SV=1	1	1	9		170000000	74000000	240000000	170000000	91000000	85000000	143750000	1.69118	0.758027	0.61432	0.211605	130500000	205000000	1.53529	2.41176	0.618515	1.27009	4	FALSE	FALSE	TRUE	0	411	0	Tmito	ERIS|Miner1|NAF-1|WFS2|ZCD2|Q8N5K1	ENSG00000145354
NIPSNAP3A	Protein NipSnap homolog 3A OS=Homo sapiens GN=NIPSNAP3A PE=1 SV=2	1	1	2			13000000	25000000			0	9500000	100	6.64386	0.211906	0.673858	0	12500000	0	100		6.64386	2	FALSE	FALSE	FALSE	2	411	0.486618	Tmito	NIPSNAP4|TASSC|Q9UFN0	ENSG00000136783
ACSL1	Long-chain-fatty-acid--CoA ligase 1 OS=Homo sapiens GN=ACSL1 PE=1 SV=1	4	4	12	31000000	25000000	34000000	42000000	23000000	35000000	28000000	33500000	1.19643	0.258734	0.332372	0.478375	29000000	32500000	1.03571	1.16071	0.0506261	0.215013	4	FALSE	TRUE	TRUE	2	411	0.486618	Tpossible_mito	ACS1|FACL1|FACL2|LACS|LACS1|LACS2|P33121	ENSG00000151726
HSDL1	Inactive hydroxysteroid dehydrogenase-like protein 1 OS=Homo sapiens GN=HSDL1 PE=1 SV=3	7	7	23	18000000	23000000	34000000	56000000	33000000	38000000	20500000	40250000	1.96341	0.973365	0.0300462	1.52221	35500000	44500000	1.73171	2.17073	0.792195	1.11818	4	TRUE	TRUE	TRUE	2	411	0.486618	Tmito	SDR12C3|Q3SXM5	ENSG00000103160
HEBP1	Heme-binding protein 1 OS=Homo sapiens GN=HEBP1 PE=1 SV=1	4	4	15	33000000	21000000	28000000	28000000	20000000	26000000	27000000	25500000	0.944444	-0.0824622	0.845645	0.0728121	23000000	24000000	0.851852	0.888889	-0.231326	-0.169925	4	FALSE	TRUE	TRUE	3	411	0.729927	Tmito	HBP|HEBP|Q9NRV9	ENSG00000013583
PTPMT1	Phosphatidylglycerophosphatase and protein-tyrosine phosphatase 1 OS=Homo sapiens GN=PTPMT1 PE=1 SV=1	2	2	3			29000000	11000000	12000000		0	13000000	100	6.64386	0.118267	0.927136	6000000	11500000	100	100	6.64386	6.64386	3	FALSE	FALSE	FALSE	9	411	2.18978	Tmito	DUSP23|MOSP|PLIP|Q8WUK0	ENSG00000110536
DTYMK	Thymidylate kinase OS=Homo sapiens GN=DTYMK PE=1 SV=4	3	3	8	53000000	35000000	19000000	22000000	17000000		44000000	14500000	0.329545	-1.60145	0.128083	0.892508	8500000	19500000	0.193182	0.443182	-2.37197	-1.17403	3	FALSE	TRUE	TRUE	6	411	1.45985	Tpossible_mito	CDC8|PP3731|TMPK|TYMK|P23919	ENSG00000168393
KARS	Lysine--tRNA ligase OS=Homo sapiens GN=KARS PE=1 SV=3	9	9	59	150000000	110000000	82000000	120000000	72000000	79000000	130000000	88250000	0.678846	-0.558843	0.236181	0.626756	75500000	96000000	0.580769	0.738462	-0.783963	-0.437405	4	FALSE	TRUE	TRUE	70	411	17.0316	Tmito	CMTRIB|DFNB89|KARS1|KARS2|KRS|Q15046	ENSG00000065427
HMBS	Porphobilinogen deaminase OS=Homo sapiens GN=HMBS PE=1 SV=2	1	1	1		14000000					7000000	0	0		0.5	0.30103	0	0	0	0			0	FALSE	FALSE	FALSE	2	411	0.486618	Tnon_mito	PBG-D|PBGD|PORC|UPS|P08397	ENSG00000256269
FASN	Fatty acid synthase OS=Homo sapiens GN=FASN PE=1 SV=3	77	78	382	400000000	440000000	180000000	230000000	140000000	140000000	420000000	172500000	0.410714	-1.28379	0.00271859	2.56566	140000000	185000000	0.333333	0.440476	-1.58496	-1.18286	4	TRUE	TRUE	TRUE	167	411	40.6326	Tpossible_mito	FAS|OA-519|SDR27X1|P49327	ENSG00000169710
TXNRD1	Thioredoxin reductase 1, cytoplasmic OS=Homo sapiens GN=TXNRD1 PE=1 SV=3	5	6	11	38000000	33000000	16000000	16000000	14000000		35500000	11500000	0.323944	-1.62619	0.00663764	2.17799	7000000	15000000	0.197183	0.422535	-2.34239	-1.24286	3	TRUE	TRUE	TRUE	4	411	0.973236	Tmito	GRIM-12|TR|TR1|TRXR1|TXNR|Q16881	ENSG00000198431
FDPS	Farnesyl pyrophosphate synthase OS=Homo sapiens GN=FDPS PE=1 SV=4	2	2	3	39000000		23000000		20000000		19500000	10750000	0.551282	-0.859137	0.732644	0.135107	10000000	10000000	0.512821	0.512821	-0.963474	-0.963474	2	FALSE	FALSE	FALSE	16	411	3.89294	Tpossible_mito	FPPS|FPS|P14324	ENSG00000160752
IDI1	Isoform 2 of Isopentenyl-diphosphate Delta-isomerase 1 OS=Homo sapiens GN=IDI1	3	3	4	45000000	23000000				22000000	34000000	5500000	0.161765	-2.62803	0.183895	0.735431	11000000	0	0.323529	0	-1.62803		1	FALSE	TRUE	FALSE	4	411	0.973236	Tpossible_mito	IPP1|IPPI1|Q13907	ENSG00000067064
ATXN2	Ataxin-2 OS=Homo sapiens GN=ATXN2 PE=1 SV=2	3	3	17	25000000	31000000	28000000	29000000	28000000	33000000	28000000	29500000	1.05357	0.0752881	0.706796	0.150706	30500000	28500000	1.08929	1.01786	0.123382	0.0255351	4	FALSE	TRUE	TRUE	33	411	8.0292	Tnon_mito	ASL13|ATX2|SCA2|TNRC13|Q99700	ENSG00000204842
BCL2L13	Bcl-2-like protein 13 OS=Homo sapiens GN=BCL2L13 PE=1 SV=1	1	1	1				18000000			0	4500000	100	6.64386	0.391002	0.407821	0	9000000	0	100		6.64386	1	FALSE	FALSE	FALSE	1	411	0.243309	Tmito	BCL-RAMBO|Bcl2-L-13|MIL1|Q9BXK5	ENSG00000099968
TRMT10C	Mitochondrial ribonuclease P protein 1 OS=Homo sapiens GN=TRMT10C PE=1 SV=2	12	12	36	53000000	63000000	61000000	73000000	51000000	57000000	58000000	60500000	1.0431	0.0608822	0.740221	0.130639	54000000	62000000	0.931034	1.06897	-0.103093	0.0962153	4	FALSE	TRUE	TRUE	21	411	5.10949	Tmito	HNYA|MRPP1|RG9MTD1|Q7L0Y3	ENSG00000174173
ACOT7	Isoform 4 of Cytosolic acyl coenzyme A thioester hydrolase OS=Homo sapiens GN=ACOT7	3	3	8	60000000	41000000	22000000			18000000	50500000	10000000	0.19802	-2.33628	0.078916	1.10283	9000000	0	0.178218	0	-2.48829		2	FALSE	TRUE	TRUE	29	411	7.05596	Tpossible_mito	ACH1|ACT|BACH|CTE-II|LACH|LACH1|RP1-120G22.10|hBACH|O00154	ENSG00000097021
ARF5	ADP-ribosylation factor 5 OS=Homo sapiens GN=ARF5 PE=1 SV=2	2	7	50		26000000		33000000			13000000	8250000	0.634615	-0.656046	0.788691	0.103093	0	16500000	0	1.26923		0.343954	1	FALSE	TRUE	TRUE	88	411	21.4112	Tnon_mito	P84085	ENSG00000004059
PYCR2	Pyrroline-5-carboxylate reductase 2 OS=Homo sapiens GN=PYCR2 PE=1 SV=1	6	7	36	79000000	100000000	110000000	110000000	77000000	63000000	89500000	90000000	1.00559	0.00803732	0.976638	0.0102664	70000000	93500000	0.782123	1.04469	-0.354533	0.0630787	4	FALSE	TRUE	TRUE	32	411	7.78589	Tmito	P5CR2|Q96C36	ENSG00000143811
RPS18	40S ribosomal protein S18 OS=Homo sapiens GN=RPS18 PE=1 SV=3	7	7	96	850000000	580000000	640000000	650000000	560000000	760000000	715000000	652500000	0.912587	-0.131965	0.724839	0.139758	660000000	605000000	0.923077	0.846154	-0.115477	-0.241008	4	FALSE	TRUE	TRUE	229	411	55.7178	Tnon_mito	D6S218E|HKE3|KE-3|KE3|S18|P62269	ENSG00000096150
RDH11	Retinol dehydrogenase 11 OS=Homo sapiens GN=RDH11 PE=1 SV=2	7	7	47	100000000	73000000	100000000	120000000	98000000	120000000	86500000	109500000	1.2659	0.340159	0.306047	0.514212	109000000	109000000	1.26012	1.26012	0.333556	0.333556	4	FALSE	TRUE	TRUE	9	411	2.18978	Tnon_mito	ARSDR1|CGI82|HCBP12|MDT1|PSDR1|RALR1|SCALD|SDR7C1|Q8TC12	ENSG00000072042
HK1	Hexokinase-1 OS=Homo sapiens GN=HK1 PE=1 SV=3	18	18	64	81000000	58000000	79000000	96000000	81000000	73000000	69500000	82250000	1.18345	0.243003	0.453363	0.343554	77000000	88500000	1.10791	1.27338	0.147845	0.348664	4	FALSE	TRUE	TRUE	37	411	9.00243	Tmito	HK1-ta|HK1-tb|HK1-tc|HKD|HKI|HMSNR|HXK1|P19367	ENSG00000156515
SHMT1	Serine hydroxymethyltransferase, cytosolic OS=Homo sapiens GN=SHMT1 PE=1 SV=1	2	3	5	42000000						21000000	0	0		0.5	0.30103	0	0	0	0			0	FALSE	TRUE	TRUE	35	411	8.51582	Tpossible_mito	CSHMT|SHMT|P34896	ENSG00000176974
ISOC2	Isoform 2 of Isochorismatase domain-containing protein 2, mitochondrial OS=Homo sapiens GN=ISOC2	1	1	1				30000000			0	7500000	100	6.64386	0.391002	0.407821	0	15000000	0	100		6.64386	1	FALSE	FALSE	FALSE	15	411	3.64964	Tmito	Q96AB3	ENSG00000063241
TARS	Threonine--tRNA ligase, cytoplasmic OS=Homo sapiens GN=TARS PE=1 SV=3	19	19	70	150000000	130000000	66000000	110000000	47000000	60000000	140000000	70750000	0.505357	-0.984625	0.0166051	1.77976	53500000	78500000	0.382143	0.560714	-1.38782	-0.834662	4	TRUE	TRUE	TRUE	65	411	15.8151	Tnon_mito	ThrRS|P26639	ENSG00000113407
FTH1	Ferritin heavy chain OS=Homo sapiens GN=FTH1 PE=1 SV=2	1	1	2			3600000		3200000		0	1700000	100	6.64386	0.18279	0.738048	1600000	1600000	100	100	6.64386	6.64386	2	FALSE	FALSE	FALSE	0	411	0	Tpossible_mito	FHC|FTH|FTHL6|HFE5|PIG15|PLIF|P02794	ENSG00000167996
TRMT1	tRNA (guanine(26)-N(2))-dimethyltransferase OS=Homo sapiens GN=TRMT1 PE=1 SV=1	1	1	3		8700000		6900000	5900000		4350000	3200000	0.735632	-0.442943	0.839017	0.0762294	2950000	6400000	0.678161	1.47126	-0.5603	0.557057	2	FALSE	FALSE	FALSE	21	411	5.10949	Tnon_mito	TRM1|Q9NXH9	ENSG00000104907
PSMA6	Proteasome subunit alpha type OS=Homo sapiens GN=PSMA6 PE=3 SV=1	7	7	36	210000000	160000000	100000000	140000000	95000000	98000000	185000000	108250000	0.585135	-0.773158	0.157922	0.801557	96500000	117500000	0.521622	0.635135	-0.938924	-0.654865	4	FALSE	TRUE	TRUE	86	411	20.9246	Tpossible_mito	IOTA|PROS27|p27K|P60900	ENSG00000100902
MRPS36	28S ribosomal protein S36, mitochondrial OS=Homo sapiens GN=MRPS36 PE=1 SV=2	1	1	3	15000000			20000000		10000000	7500000	7500000	1	0	1	0	5000000	10000000	0.666667	1.33333	-0.584963	0.415037	2	FALSE	FALSE	FALSE	10	411	2.43309	Tmito	MRP-S36|P82909	ENSG00000134056
PACSIN2	Protein kinase C and casein kinase substrate in neurons protein 2 OS=Homo sapiens GN=PACSIN2 PE=1 SV=2	4	4	6			23000000		25000000	35000000	0	20750000	100	6.64386	0.0675809	1.17018	30000000	12500000	100	100	6.64386	6.64386	3	FALSE	TRUE	TRUE	10	411	2.43309	Tnon_mito	SDPII|Q9UNF0	ENSG00000100266
MTHFD1	C-1-tetrahydrofolate synthase, cytoplasmic OS=Homo sapiens GN=MTHFD1 PE=2 SV=1	35	35	161	300000000	210000000	160000000	210000000	140000000	160000000	255000000	167500000	0.656863	-0.606336	0.279108	0.554228	150000000	175000000	0.588235	0.686275	-0.765535	-0.543142	4	FALSE	TRUE	TRUE	110	411	26.764	Tmito	MTHFC|MTHFD|P11586	ENSG00000100714
EEFSEC	Selenocysteine-specific elongation factor OS=Homo sapiens GN=EEFSEC PE=1 SV=4	2	2	6	19000000	370000000		16000000	28000000	20000000	194500000	16000000	0.0822622	-3.60363	0.494482	0.305849	24000000	22000000	0.123393	0.113111	-3.01866	-3.14419	3	FALSE	FALSE	TRUE	4	411	0.973236	Tpossible_mito	EFSEC|SELB|P57772	ENSG00000132394
DHCR24	Delta(24)-sterol reductase OS=Homo sapiens GN=DHCR24 PE=1 SV=2	3	3	12	59000000	36000000	48000000	62000000	56000000	48000000	47500000	53500000	1.12632	0.171611	0.694126	0.158562	52000000	59000000	1.09474	1.24211	0.130584	0.312787	4	FALSE	TRUE	TRUE	3	411	0.729927	Tnon_mito	DCE|Nbla03646|SELADIN1|seladin-1|Q15392	ENSG00000116133
NUDT5	ADP-sugar pyrophosphatase OS=Homo sapiens GN=NUDT5 PE=2 SV=1	4	4	5	65000000	39000000			21000000	21000000	52000000	10500000	0.201923	-2.30812	0.144424	0.840361	21000000	10500000	0.403846	0.201923	-1.30812	-2.30812	2	FALSE	TRUE	TRUE	29	411	7.05596	Tnon_mito	YSA1|YSA1H|YSAH1|hYSAH1|Q9UKK9	ENSG00000165609
MICU1	Calcium uptake protein 1, mitochondrial OS=Homo sapiens GN=MICU1 PE=2 SV=1	1	1	3		56000000	20000000			60000000	28000000	20000000	0.714286	-0.485427	0.828554	0.0816792	30000000	0	1.07143	0	0.0995357		2	FALSE	FALSE	FALSE	1	411	0.243309	Tmito	CALC|CBARA1|EFHA3|Q9BPX6	ENSG00000107745
SOD1	Superoxide dismutase [Cu-Zn] OS=Homo sapiens GN=SOD1 PE=1 SV=2	6	6	32	150000000	160000000	90000000	160000000	72000000	73000000	155000000	98750000	0.637097	-0.650416	0.0707047	1.15055	72500000	116000000	0.467742	0.748387	-1.09622	-0.418143	4	FALSE	TRUE	TRUE	31	411	7.54258	Tmito	ALS|ALS1|HEL-S-44|IPOA|SOD|hSod1|homodimer|P00441	ENSG00000142168
NDUFAF3	NADH dehydrogenase [ubiquinone] 1 alpha subcomplex assembly factor 3 OS=Homo sapiens GN=NDUFAF3 PE=1 SV=1	3	3	7	40000000	40000000	15000000				40000000	3750000	0.09375	-3.41504	0.00235048	2.62884	0	0	0	0			1	TRUE	TRUE	TRUE	2	411	0.486618	Tmito	2P1|C3orf60|E3-3|Q9BU61	ENSG00000178057
TPI1	Triosephosphate isomerase OS=Homo sapiens GN=TPI1 PE=1 SV=3	13	13	210	1400000000	1200000000	530000000	700000000	420000000	490000000	1300000000	535000000	0.411538	-1.2809	0.0305791	1.51458	455000000	560000000	0.35	0.430769	-1.51457	-1.21501	4	TRUE	TRUE	TRUE	90	411	21.8978	Tnon_mito	HEL-S-49|TIM|TPI|TPID|P60174	ENSG00000111669
FASTKD2	FAST kinase domain-containing protein 2 OS=Homo sapiens GN=FASTKD2 PE=1 SV=1	1	1	1		270000000					135000000	0	0		0.5	0.30103	0	0	0	0			0	FALSE	FALSE	FALSE	10	411	2.43309	Tmito	KIAA0971|Q9NYY8	ENSG00000118246
PEX11B	Peroxisomal membrane protein 11B OS=Homo sapiens GN=PEX11B PE=1 SV=1	1	1	2				18000000		17000000	0	8750000	100	6.64386	0.18195	0.740048	8500000	9000000	100	100	6.64386	6.64386	2	FALSE	FALSE	FALSE	0	411	0	Tpossible_mito	PEX11-BETA|PEX14B|O96011	ENSG00000131779
CYB5A	Cytochrome b5 OS=Homo sapiens GN=CYB5A PE=1 SV=2	2	2	8	80000000	55000000	72000000	110000000	78000000	82000000	67500000	85500000	1.26667	0.341037	0.355966	0.448592	80000000	94000000	1.18519	1.39259	0.245112	0.477773	4	FALSE	FALSE	TRUE	3	411	0.729927	Tpossible_mito	CYB5|MCB5|P00167	ENSG00000166347
GAPDH	Glyceraldehyde-3-phosphate dehydrogenase OS=Homo sapiens GN=GAPDH PE=1 SV=3	13	13	200	2900000000	1900000000	810000000	1100000000	710000000	850000000	2400000000	867500000	0.361458	-1.4681	0.192671	0.715184	780000000	905000000	0.325	0.377083	-1.62149	-1.40704	4	FALSE	TRUE	TRUE	248	411	60.3406	Tpossible_mito	G3PD|GAPD|HEL-S-162eP|P04406	ENSG00000111640
DBI	Acyl-CoA-binding protein OS=Homo sapiens GN=DBI PE=1 SV=2	3	3	3	55000000	51000000				28000000	53000000	7000000	0.132075	-2.92057	0.00525246	2.27964	14000000	0	0.264151	0	-1.92057		1	TRUE	TRUE	FALSE	1	411	0.243309	Tpossible_mito	ACBD1|ACBP|CCK-RP|EP|P07108	ENSG00000155368
PNPT1	Polyribonucleotide nucleotidyltransferase 1, mitochondrial OS=Homo sapiens GN=PNPT1 PE=1 SV=2	11	11	30	56000000	43000000	55000000	77000000	29000000	52000000	49500000	53250000	1.07576	0.105353	0.7663	0.115601	40500000	53000000	0.818182	1.07071	-0.289507	0.0985638	4	FALSE	TRUE	TRUE	21	411	5.10949	Tmito	COXPD13|DFNB70|OLD35|PNPASE|old-35|Q8TCS8	ENSG00000138035
SCP2	Non-specific lipid-transfer protein OS=Homo sapiens GN=SCP2 PE=1 SV=2	8	8	43	130000000	100000000	130000000	150000000	93000000	98000000	115000000	117750000	1.02391	0.0340932	0.901205	0.0451763	95500000	121500000	0.830435	1.05652	-0.268061	0.0793225	4	FALSE	TRUE	TRUE	7	411	1.70316	Tpossible_mito	NLTP|NSL-TP|SCP-2|SCP-CHI|SCP-X|SCPX|P22307	ENSG00000116171
NT5DC3	5'-nucleotidase domain-containing protein 3 OS=Homo sapiens GN=NT5DC3 PE=2 SV=1	3	3	4				22000000	6100000	9400000	0	9375000	100	6.64386	0.136414	0.86514	7750000	14050000	100	100	6.64386	6.64386	3	FALSE	TRUE	FALSE	0	411	0	Tmito	TU12B1-TY|TU12B1TY|Q86UY8	ENSG00000111696
ACOX1	Peroxisomal acyl-coenzyme A oxidase 1 OS=Homo sapiens GN=ACOX1 PE=1 SV=3	11	11	44	50000000	50000000	89000000	110000000	41000000	33000000	50000000	68250000	1.365	0.448901	0.399216	0.398792	37000000	75500000	0.74	1.51	-0.434403	0.594549	4	FALSE	TRUE	TRUE	4	411	0.973236	Tpossible_mito	ACOX|PALMCOX|SCOX|Q15067	ENSG00000161533
LDHB	L-lactate dehydrogenase B chain OS=Homo sapiens GN=LDHB PE=1 SV=2	16	17	169	1400000000	1100000000	470000000	500000000	390000000	470000000	1250000000	457500000	0.366	-1.45008	0.112006	0.95076	430000000	445000000	0.344	0.356	-1.53952	-1.49005	4	FALSE	TRUE	TRUE	164	411	39.9027	Tpossible_mito	HEL-S-281|LDH-B|LDH-H|LDHBD|TRG-5|P07195	ENSG00000111716
HINT1	Histidine triad nucleotide-binding protein 1 OS=Homo sapiens GN=HINT1 PE=1 SV=2	3	3	6	120000000	58000000		82000000			89000000	20500000	0.230337	-2.11818	0.210392	0.676972	0	41000000	0	0.460674		-1.11818	1	FALSE	TRUE	TRUE	27	411	6.56934	Tnon_mito	HINT|NMAN|PKCI-1|PRKCNH1|P49773	ENSG00000169567
DNAJC3	DnaJ homolog subfamily C member 3 OS=Homo sapiens GN=DNAJC3 PE=1 SV=1	2	2	6		31000000	41000000	51000000	13000000	31000000	15500000	34000000	2.19355	1.13327	0.425018	0.371592	22000000	32000000	1.41935	2.06452	0.505235	1.0458	4	FALSE	FALSE	TRUE	1	411	0.243309	Tnon_mito	ERdj6|HP58|P58|P58IPK|PRKRI|Q13217	ENSG00000102580
TUBB6	Tubulin beta-6 chain (Fragment) OS=Homo sapiens GN=TUBB6 PE=4 SV=1	1	1	4	480000000	400000000	200000000	400000000			440000000	150000000	0.340909	-1.55254	0.0521354	1.28287	0	200000000	0	0.454545		-1.1375	2	FALSE	FALSE	FALSE	317	411	77.129	Tnon_mito	HsT1601|TUBB-5|Q9BUF5	ENSG00000176014
TUBB6	Tubulin beta-6 chain OS=Homo sapiens GN=TUBB6 PE=1 SV=1	9	16	138	130000000	110000000	100000000	47000000	39000000	53000000	120000000	59750000	0.497917	-1.00602	0.0258343	1.5878	46000000	43000000	0.383333	0.358333	-1.38333	-1.48063	4	TRUE	TRUE	TRUE	317	411	77.129	Tnon_mito	HsT1601|TUBB-5|Q9BUF5	ENSG00000176014
DHRS7	Dehydrogenase/reductase SDR family member 7 OS=Homo sapiens GN=DHRS7 PE=1 SV=1	7	7	35	66000000	91000000	110000000	140000000	55000000	72000000	78500000	94250000	1.20064	0.2638	0.528595	0.276877	63500000	97500000	0.808917	1.24204	-0.305936	0.31271	4	FALSE	TRUE	TRUE	3	411	0.729927	Tnon_mito	SDR34C1|retDSR4|retSDR4|Q9Y394	ENSG00000100612
ADSL	Adenylosuccinate lyase OS=Homo sapiens GN=ADSL PE=1 SV=2	7	7	22	62000000	56000000	30000000	31000000	28000000	31000000	59000000	30000000	0.508475	-0.975752	0.0536446	1.27047	29500000	29500000	0.5	0.5	-1	-1	4	FALSE	TRUE	TRUE	31	411	7.54258	Tpossible_mito	AMPS|ASASE|ASL|P30566	ENSG00000239900
CLUH	Clustered mitochondria protein homolog (Fragment) OS=Homo sapiens GN=CLUH PE=2 SV=2	2	2	5	27000000	21000000	23000000	30000000			24000000	13250000	0.552083	-0.857042	0.271887	0.565611	0	15000000	0	0.625		-0.678072	2	FALSE	FALSE	TRUE	21	411	5.10949	Tnon_mito	CLU1|KIAA0664|O75153	ENSG00000132361
BID	Isoform 2 of BH3-interacting domain death agonist OS=Homo sapiens GN=BID	2	2	6	39000000	39000000	15000000	16000000			39000000	7750000	0.198718	-2.33121	0.00604333	2.21872	0	8000000	0	0.205128		-2.2854	2	TRUE	FALSE	TRUE	6	411	1.45985	Tmito	FP497|P55957	ENSG00000015475
NME1	Isoform 2 of Nucleoside diphosphate kinase A OS=Homo sapiens GN=NME1	2	8	88	350000000	290000000	410000000	430000000	340000000	460000000	320000000	410000000	1.28125	0.357552	0.122771	0.910905	400000000	385000000	1.25	1.20312	0.321928	0.266787	4	FALSE	TRUE	TRUE	123	411	29.927	Tpossible_mito	AWD|GAAD|NB|NBS|NDKA|NDPK-A|NDPKA|NM23|NM23-H1|P15531	ENSG00000239672
GDPD1	Glycerophosphodiester phosphodiesterase domain-containing protein 1 OS=Homo sapiens GN=GDPD1 PE=1 SV=2	2	2	8		15000000	28000000	33000000	19000000	19000000	7500000	24750000	3.3	1.72247	0.218011	0.661522	19000000	26000000	2.53333	3.46667	1.34104	1.79355	4	FALSE	FALSE	TRUE	2	411	0.486618	Tnon_mito	GDE4|Q8N9F7	ENSG00000153982
MFF	Mitochondrial fission factor OS=Homo sapiens GN=MFF PE=1 SV=1	1	1	1			39000000				0	9750000	100	6.64386	0.391002	0.407821	0	0	0	0			1	FALSE	FALSE	FALSE	6	411	1.45985	Tmito	C2orf33|GL004|Q9GZY8	ENSG00000168958
PDIA6	Isoform 2 of Protein disulfide-isomerase A6 OS=Homo sapiens GN=PDIA6	16	16	217	650000000	890000000	810000000	1100000000	720000000	540000000	770000000	792500000	1.02922	0.0415525	0.901863	0.0448594	630000000	910000000	0.818182	1.18182	-0.289507	0.241008	4	FALSE	TRUE	TRUE	129	411	31.3869	Tnon_mito	ERP5|P5|TXNDC7|Q15084	ENSG00000143870
DCXR	L-xylulose reductase OS=Homo sapiens GN=DCXR PE=1 SV=2	4	4	18	88000000	59000000	39000000	60000000	44000000	46000000	73500000	47250000	0.642857	-0.63743	0.301672	0.520466	45000000	52000000	0.612245	0.707483	-0.707819	-0.499233	4	FALSE	TRUE	TRUE	15	411	3.64964	Tmito	DCR|HCR2|HCRII|KIDCR|P34H|SDR20C1|XR|Q7Z4W1	ENSG00000169738
PDIA4	Protein disulfide-isomerase A4 OS=Homo sapiens GN=PDIA4 PE=1 SV=2	28	28	324	690000000	470000000	510000000	530000000	370000000	560000000	580000000	492500000	0.849138	-0.235929	0.568078	0.245592	465000000	450000000	0.801724	0.775862	-0.318822	-0.366128	4	FALSE	TRUE	TRUE	59	411	14.3552	Tnon_mito	ERP70|ERP72|ERp-72|P13667	ENSG00000155660
METTL7A	Methyltransferase-like protein 7A (Fragment) OS=Homo sapiens GN=METTL7A PE=4 SV=1	1	1	6	33000000	19000000	29000000	38000000	28000000	28000000	26000000	30750000	1.18269	0.242075	0.618816	0.208439	28000000	33000000	1.07692	1.26923	0.106915	0.343954	4	FALSE	FALSE	TRUE	1	411	0.243309	Tnon_mito	AAM-B|Q9H8H3	ENSG00000185432
GLRX3	Glutaredoxin-3 OS=Homo sapiens GN=GLRX3 PE=1 SV=2	4	4	14	94000000	71000000	30000000	38000000	34000000	29000000	82500000	32750000	0.39697	-1.3329	0.135227	0.868936	31500000	36000000	0.381818	0.436364	-1.38904	-1.1964	4	FALSE	TRUE	TRUE	20	411	4.86618	Tnon_mito	GLRX4|GRX3|GRX4|PICOT|TXNL2|TXNL3|O76003	ENSG00000108010
SLC12A7	Solute carrier family 12 member 7 OS=Homo sapiens GN=SLC12A7 PE=1 SV=3	1	1	1	90000000						45000000	0	0		0.5	0.30103	0	0	0	0			0	FALSE	FALSE	FALSE	0	411	0	Tnon_mito	KCC4|Q9Y666	ENSG00000113504
RPL18	60S ribosomal protein L18 (Fragment) OS=Homo sapiens GN=RPL18 PE=3 SV=1	7	7	65	1100000000	800000000	890000000	1100000000	830000000	930000000	950000000	937500000	0.986842	-0.0191088	0.948188	0.0231058	880000000	965000000	0.926316	1.01579	-0.110424	0.0226014	4	FALSE	TRUE	TRUE	191	411	46.472	Tnon_mito	L18|Q07020	ENSG00000063177
MRPL48	39S ribosomal protein L48, mitochondrial OS=Homo sapiens GN=MRPL48 PE=1 SV=2	1	1	4				40000000	28000000	29000000	0	24250000	100	6.64386	0.0654563	1.18405	28500000	34000000	100	100	6.64386	6.64386	3	FALSE	FALSE	FALSE	12	411	2.91971	Tmito	HSPC290|L48MT|MRP-L48|Q96GC5	ENSG00000175581
HSD17B12	Estradiol 17-beta-dehydrogenase 12 OS=Homo sapiens GN=HSD17B12 PE=1 SV=2	10	10	58	180000000	130000000	210000000	270000000	200000000	210000000	155000000	222500000	1.43548	0.521537	0.158679	0.79948	205000000	235000000	1.32258	1.51613	0.403356	0.600393	4	FALSE	TRUE	TRUE	27	411	6.56934	Tnon_mito	KAR|SDR12C1|Q53GQ0	ENSG00000149084
ACSS2	Isoform 2 of Acetyl-coenzyme A synthetase, cytoplasmic OS=Homo sapiens GN=ACSS2	1	1	1	170000000						85000000	0	0		0.5	0.30103	0	0	0	0			0	FALSE	FALSE	FALSE	0	411	0	Tnon_mito	ACAS2|ACECS|ACS|ACSA|dJ1161H23.1|Q9NR19	ENSG00000131069
CYB5R3	Isoform 3 of NADH-cytochrome b5 reductase 3 OS=Homo sapiens GN=CYB5R3	7	7	48	110000000	170000000	130000000	210000000	130000000	90000000	140000000	140000000	1	0	1	0	110000000	170000000	0.785714	1.21429	-0.347923	0.280108	4	FALSE	TRUE	TRUE	25	411	6.08273	Tmito	B5R|DIA1|P00387	ENSG00000100243
GGH	Gamma-glutamyl hydrolase OS=Homo sapiens GN=GGH PE=1 SV=2	7	7	26	32000000	27000000	58000000	61000000	43000000	58000000	29500000	55000000	1.86441	0.898717	0.00595495	2.22512	50500000	52000000	1.71186	1.76271	0.775568	0.817797	4	TRUE	TRUE	TRUE	6	411	1.45985	Tnon_mito	GH|Q92820	ENSG00000137563
QARS	Glutamine--tRNA ligase OS=Homo sapiens GN=QARS PE=1 SV=1	17	17	55	92000000	76000000	46000000	75000000	47000000	58000000	84000000	56500000	0.672619	-0.572138	0.0946789	1.02375	52500000	61000000	0.625	0.72619	-0.678072	-0.46158	4	FALSE	TRUE	TRUE	94	411	22.871	Tpossible_mito	GLNRS|PRO2195|P47897	ENSG00000172053
RPS9	40S ribosomal protein S9 OS=Homo sapiens GN=RPS9 PE=1 SV=3	9	9	40	340000000	230000000	250000000	160000000	320000000	250000000	285000000	245000000	0.859649	-0.21818	0.603301	0.219466	285000000	240000000	1	0.842105	0	-0.247928	4	FALSE	TRUE	TRUE	170	411	41.3625	Tnon_mito	S9|P46781	ENSG00000170889
CSNK2A1	Casein kinase II subunit alpha OS=Homo sapiens GN=CSNK2A1 PE=1 SV=1	6	6	19	100000000	100000000	48000000	98000000	34000000	28000000	100000000	52000000	0.52	-0.943416	0.0567716	1.24587	31000000	66000000	0.31	0.66	-1.68966	-0.599462	4	FALSE	TRUE	TRUE	64	411	15.5718	Tnon_mito	CK2A1|CKII|CSNK2A3|P68400	ENSG00000101266
PSMB7	Proteasome subunit beta type-7 OS=Homo sapiens GN=PSMB7 PE=1 SV=1	3	3	12	51000000	80000000	17000000	88000000	35000000	27000000	65500000	41750000	0.637405	-0.649719	0.343671	0.463857	31000000	61500000	0.473282	0.938931	-1.07923	-0.0909085	4	FALSE	TRUE	TRUE	63	411	15.3285	Tnon_mito	Z|Q99436	ENSG00000136930
MSH3	DNA mismatch repair protein Msh3 OS=Homo sapiens GN=MSH3 PE=1 SV=4	1	1	1			8100000				0	2025000	100	6.64386	0.391002	0.407821	0	0	0	0			1	FALSE	FALSE	FALSE	9	411	2.18978	Tnon_mito	DUP|MRP1|P20585	ENSG00000113318
DNAJB12	DnaJ (Hsp40) homolog, subfamily B, member 12, isoform CRA_c OS=Homo sapiens GN=DNAJB12 PE=4 SV=1	2	2	4		14000000	18000000	18000000	12000000		7000000	12000000	1.71429	0.777608	0.609782	0.214826	6000000	15000000	0.857143	2.14286	-0.222392	1.09954	3	FALSE	FALSE	FALSE	7	411	1.70316	Tnon_mito	DJ10|Q9NXW2	ENSG00000148719
EPRS	Bifunctional glutamate/proline--tRNA ligase OS=Homo sapiens GN=EPRS PE=1 SV=5	44	44	222	170000000	220000000	120000000	110000000	90000000	110000000	195000000	107500000	0.551282	-0.859137	0.159254	0.797911	100000000	100000000	0.512821	0.512821	-0.963474	-0.963474	4	FALSE	TRUE	TRUE	157	411	38.1995	Tnon_mito	EARS|GLUPRORS|PARS|QARS|QPRS|P07814	ENSG00000136628
EEF1A2	Elongation factor 1-alpha 2 OS=Homo sapiens GN=EEF1A2 PE=1 SV=1	5	12	224	190000000	150000000	250000000	260000000	120000000	110000000	170000000	185000000	1.08824	0.121991	0.756825	0.121005	115000000	190000000	0.676471	1.11765	-0.563901	0.160465	4	FALSE	TRUE	TRUE	343	411	83.455	Tnon_mito	EEF1AL|EF-1-alpha-2|EF1A|HS1|STN|STNL|Q05639	ENSG00000101210
EDF1	Endothelial differentiation-related factor 1 OS=Homo sapiens GN=EDF1 PE=1 SV=1	3	3	29	210000000	160000000	120000000	170000000	140000000	160000000	185000000	147500000	0.797297	-0.32681	0.34799	0.458434	150000000	155000000	0.810811	0.837838	-0.302563	-0.255257	4	FALSE	TRUE	TRUE	80	411	19.4647	Tnon_mito	EDF-1|MBF1|O60869	ENSG00000107223
ACYP1	Acylphosphatase OS=Homo sapiens GN=ACYP1 PE=2 SV=1	1	1	4	21000000	17000000	17000000	17000000			19000000	8500000	0.447368	-1.16046	0.122968	0.910208	0	8500000	0	0.447368		-1.16046	2	FALSE	FALSE	FALSE	0	411	0	Tnon_mito	ACYPE|P07311	ENSG00000119640
PKM	Pyruvate kinase PKM OS=Homo sapiens GN=PKM PE=1 SV=4	28	28	314	1700000000	1700000000	500000000	860000000	440000000	490000000	1700000000	572500000	0.336765	-1.57019	0.00135639	2.86761	465000000	650000000	0.273529	0.382353	-1.87023	-1.38702	4	TRUE	TRUE	TRUE	249	411	60.5839	Tpossible_mito	CTHBP|HEL-S-30|OIP3|PK3|PKM2|TCB|THBP1|P14618	ENSG00000067225
MCFD2	Multiple coagulation factor deficiency protein 2 OS=Homo sapiens GN=MCFD2 PE=1 SV=1	2	2	7	49000000	51000000	49000000	45000000	28000000	44000000	50000000	41500000	0.83	-0.268817	0.162966	0.787904	36000000	36500000	0.72	0.73	-0.473931	-0.454032	4	FALSE	FALSE	TRUE	1	411	0.243309	Tnon_mito	F5F8D|F5F8D2|LMAN1IP|SDNSF|Q8NI22	ENSG00000180398
HSP90B1	Endoplasmin OS=Homo sapiens GN=HSP90B1 PE=1 SV=1	41	43	408	1100000000	770000000	830000000	1000000000	770000000	700000000	935000000	825000000	0.882353	-0.180572	0.624587	0.204407	735000000	885000000	0.786096	0.946524	-0.347222	-0.0792889	4	FALSE	TRUE	TRUE	186	411	45.2555	Tnon_mito	ECGP|GP96|GRP94|HEL-S-125m|HEL35|TRA1|P14625	ENSG00000166598
VCP	Transitional endoplasmic reticulum ATPase OS=Homo sapiens GN=VCP PE=1 SV=4	31	31	250	370000000	320000000	310000000	450000000	200000000	210000000	345000000	292500000	0.847826	-0.23816	0.455082	0.341911	205000000	325000000	0.594203	0.942029	-0.750972	-0.0861566	4	FALSE	TRUE	TRUE	167	411	40.6326	Tnon_mito	ALS14|HEL-220|HEL-S-70|IBMPFD|IBMPFD1|TERA|p97|P55072	ENSG00000165280
MYCBP	C-Myc-binding protein OS=Homo sapiens GN=MYCBP PE=1 SV=3	5	5	31	140000000	140000000	120000000	170000000	130000000	94000000	140000000	128500000	0.917857	-0.123658	0.518809	0.284993	112000000	150000000	0.8	1.07143	-0.321928	0.0995357	4	FALSE	TRUE	TRUE	72	411	17.5182	Tpossible_mito	AMY-1|Q99417	ENSG00000214114
ERP44	Endoplasmic reticulum resident protein 44 OS=Homo sapiens GN=ERP44 PE=1 SV=1	5	5	16	57000000		81000000	140000000	130000000	87000000	28500000	109500000	3.84211	1.9419	0.159998	0.795885	108500000	135000000	3.80702	4.73684	1.92866	2.24393	4	FALSE	TRUE	TRUE	11	411	2.6764	Tnon_mito	PDIA10|TXNDC4|Q9BS26	ENSG00000023318
RETSAT	All-trans-retinol 13,14-reductase OS=Homo sapiens GN=RETSAT PE=1 SV=2	1	1	2			8300000	4100000			0	3100000	100	6.64386	0.216198	0.665148	0	2050000	0	100		6.64386	2	FALSE	FALSE	FALSE	0	411	0	Tnon_mito	Q6NUM9	ENSG00000042445
UBE2M	NEDD8-conjugating enzyme Ubc12 OS=Homo sapiens GN=UBE2M PE=1 SV=1	4	4	13	82000000	76000000	41000000	66000000	32000000	34000000	79000000	43250000	0.547468	-0.869153	0.0152823	1.81581	33000000	49000000	0.417722	0.620253	-1.25939	-0.689071	4	TRUE	TRUE	TRUE	53	411	12.8954	Tnon_mito	UBC-RS2|UBC12|hUbc12|P61081	ENSG00000130725
DNAH2	Dynein heavy chain 2, axonemal OS=Homo sapiens GN=DNAH2 PE=2 SV=3	1	1	1							0	0	100	6.64386			0	0	0	0			0		FALSE	FALSE	4	411	0.973236	Tnon_mito	DNAHC2|DNHD3|Q9P225	ENSG00000183914
HARS	Histidine--tRNA ligase, cytoplasmic OS=Homo sapiens GN=HARS PE=1 SV=2	6	10	47	92000000	110000000	100000000	95000000	45000000	51000000	101000000	72750000	0.720297	-0.473336	0.171535	0.765648	48000000	70000000	0.475248	0.693069	-1.07325	-0.528928	4	FALSE	TRUE	TRUE	34	411	8.27251	Tnon_mito	HRS|USH3B|P12081	ENSG00000170445
MDN1	Midasin OS=Homo sapiens GN=MDN1 PE=1 SV=2	1	1	3	13000000	11000000		14000000			12000000	3500000	0.291667	-1.77761	0.0904575	1.04356	0	7000000	0	0.583333		-0.777608	1	FALSE	FALSE	FALSE	27	411	6.56934	Tnon_mito	Q9NU22	ENSG00000112159
NSF	Vesicle-fusing ATPase OS=Homo sapiens GN=NSF PE=1 SV=3	20	20	53	96000000	38000000	65000000	85000000	64000000	82000000	67000000	74000000	1.10448	0.143364	0.8497	0.0707342	73000000	74500000	1.08955	1.11194	0.123735	0.153079	4	FALSE	TRUE	TRUE	31	411	7.54258	Tnon_mito	SKD2|P46459	ENSG00000073969
MTOR	Serine/threonine-protein kinase mTOR OS=Homo sapiens GN=MTOR PE=1 SV=1	1	1	1	18000000						9000000	0	0		0.5	0.30103	0	0	0	0			0	FALSE	FALSE	FALSE	10	411	2.43309	Tpossible_mito	FRAP|FRAP1|FRAP2|RAFT1|RAPT1|P42345	ENSG00000198793
FOXRED1	FAD-dependent oxidoreductase domain-containing protein 1 OS=Homo sapiens GN=FOXRED1 PE=1 SV=2	1	1	4			11000000	11000000	9800000	8200000	0	10000000	100	6.64386	0.000633597	3.19819	9000000	10400000	100	100	6.64386	6.64386	4	TRUE	FALSE	FALSE	1	411	0.243309	Tmito	H17|Q96CU9	ENSG00000110074
CBS	Isoform 2 of Cystathionine beta-synthase OS=Homo sapiens GN=CBS	2	2	8	37000000	32000000	18000000	21000000	11000000	17000000	34500000	16750000	0.485507	-1.04244	0.0194325	1.71147	14000000	16000000	0.405797	0.463768	-1.30117	-1.10852	4	TRUE	FALSE	TRUE	25	411	6.08273	Tnon_mito	HIP4|P0DN79	ENSG00000160200
DDX1	ATP-dependent RNA helicase DDX1 OS=Homo sapiens GN=DDX1 PE=1 SV=2	26	26	124	170000000	180000000	230000000	290000000	130000000	130000000	175000000	195000000	1.11429	0.156119	0.648825	0.187873	130000000	210000000	0.742857	1.2	-0.428843	0.263034	4	FALSE	TRUE	TRUE	125	411	30.4136	Tnon_mito	DBP-RB|UKVH5d|Q92499	ENSG00000079785
SNRNP200	U5 small nuclear ribonucleoprotein 200 kDa helicase OS=Homo sapiens GN=SNRNP200 PE=1 SV=2	29	29	86	57000000	69000000	54000000	78000000	590000000	46000000	63000000	192000000	3.04762	1.60768	0.403289	0.394383	318000000	334000000	5.04762	5.30159	2.3356	2.40642	4	FALSE	TRUE	TRUE	146	411	35.5231	Tnon_mito	ASCC3L1|BRR2|HELIC2|RP33|U5-200KD|O75643	ENSG00000144028
VPS29	Vacuolar protein sorting-associated protein 29 OS=Homo sapiens GN=VPS29 PE=2 SV=1	5	5	16	73000000	48000000	55000000	61000000	36000000	45000000	60500000	49250000	0.81405	-0.296811	0.526262	0.278798	40500000	48500000	0.669421	0.801653	-0.579013	-0.31895	4	FALSE	TRUE	TRUE	11	411	2.6764	Tnon_mito	DC15|PEP11|Q9UBQ0	ENSG00000111237
DNM2	Dynamin-2 OS=Homo sapiens GN=DNM2 PE=1 SV=2	7	7	24	54000000	64000000	56000000	64000000	26000000	38000000	59000000	46000000	0.779661	-0.359081	0.261426	0.582651	32000000	45000000	0.542373	0.762712	-0.882643	-0.39079	4	FALSE	TRUE	TRUE	40	411	9.73236	Tnon_mito	CMT2M|CMTDI1|CMTDIB|DI-CMTB|DYN2|DYNII|LCCS5|P50570	ENSG00000079805
AGPS	Alkyldihydroxyacetonephosphate synthase, peroxisomal OS=Homo sapiens GN=AGPS PE=1 SV=1	16	16	62	57000000	61000000	77000000	130000000	95000000	85000000	59000000	96750000	1.63983	0.713547	0.0461852	1.3355	90000000	112500000	1.52542	1.90678	0.60921	0.931138	4	TRUE	TRUE	TRUE	11	411	2.6764	Tpossible_mito	ADAP-S|ADAS|ADHAPS|ADPS|ALDHPSY|O00116	ENSG00000018510
PPT2	Isoform 3 of Lysosomal thioesterase PPT2 OS=Homo sapiens GN=PPT2	3	3	10	83000000	61000000	82000000	81000000	79000000	120000000	72000000	90500000	1.25694	0.329921	0.308657	0.510523	99500000	80000000	1.38194	1.11111	0.4667	0.152003	4	FALSE	TRUE	TRUE	0	411	0	Tnon_mito	C6orf8|G14|PPT-2|Q9UMR5	ENSG00000168452
CARM1	Histone-arginine methyltransferase CARM1 OS=Homo sapiens GN=CARM1 PE=1 SV=3	2	2	6	71000000	69000000		36000000	33000000	42000000	70000000	27750000	0.396429	-1.33487	0.0201331	1.69609	37500000	34500000	0.535714	0.492857	-0.900464	-1.02076	3	TRUE	FALSE	TRUE	24	411	5.83942	Tnon_mito	PRMT4|Q86X55	ENSG00000142453
PDLIM5	PDZ and LIM domain protein 5 OS=Homo sapiens GN=PDLIM5 PE=1 SV=5	3	3	9	16000000	23000000	23000000	23000000		25000000	19500000	17750000	0.910256	-0.135655	0.812042	0.0904216	12500000	11500000	0.641026	0.589744	-0.641546	-0.76184	3	FALSE	TRUE	TRUE	27	411	6.56934	Tnon_mito	ENH|ENH1|LIM|Q96HC4	ENSG00000163110
SGTA	Small glutamine-rich tetratricopeptide repeat-containing protein alpha OS=Homo sapiens GN=SGTA PE=1 SV=1	5	5	23	100000000	110000000	94000000	120000000	100000000	66000000	105000000	95000000	0.904762	-0.14439	0.460683	0.336597	83000000	110000000	0.790476	1.04762	-0.339206	0.0671142	4	FALSE	TRUE	TRUE	19	411	4.62287	Tnon_mito	SGT|alphaSGT|hSGT|O43765	ENSG00000104969
SLC25A6	ADP/ATP translocase 3 OS=Homo sapiens GN=SLC25A6 PE=1 SV=4	2	10	38	68000000	31000000		38000000	59000000	91000000	49500000	47000000	0.949495	-0.0747678	0.930825	0.0311321	75000000	48500000	1.51515	0.979798	0.599462	-0.0294438	3	FALSE	TRUE	TRUE	201	411	48.9051	Tmito	2|3|AAC3|ANT|ANT 2|ANT 3|ANT3|ANT3Y|P12236	ENSG00000169100
AGL	Glycogen debranching enzyme OS=Homo sapiens GN=AGL PE=1 SV=3	3	3	9	25000000	28000000		16000000		14000000	26500000	7500000	0.283019	-1.82103	0.0179345	1.74631	7000000	8000000	0.264151	0.301887	-1.92057	-1.72792	2	TRUE	TRUE	TRUE	70	411	17.0316	Tnon_mito	GDE|P35573	ENSG00000162688
CCT2	T-complex protein 1 subunit beta OS=Homo sapiens GN=CCT2 PE=1 SV=4	28	28	249	700000000	770000000	350000000	670000000	660000000	360000000	735000000	510000000	0.693878	-0.527247	0.0841492	1.07495	510000000	665000000	0.693878	0.904762	-0.527247	-0.14439	4	FALSE	TRUE	TRUE	180	411	43.7956	Tnon_mito	99D8.1|CCT-beta|CCTB|HEL-S-100n|PRO1633|TCP-1-beta|P78371	ENSG00000166226
GTPBP1	GTP-binding protein 1 OS=Homo sapiens GN=GTPBP1 PE=1 SV=3	1	1	2	24000000	28000000					26000000	0	0		0.0488745	1.31092	0	0	0	0			0	TRUE	FALSE	FALSE	18	411	4.37956	Tnon_mito	GP-1|GP1|HSPC018|O00178	ENSG00000100226
IMPA1	Isoform 3 of Inositol monophosphatase 1 OS=Homo sapiens GN=IMPA1	3	3	4	23000000	22000000		13000000			22500000	3250000	0.144444	-2.79141	0.00875224	2.05788	0	6500000	0	0.288889		-1.79141	1	TRUE	TRUE	FALSE	9	411	2.18978	Tpossible_mito	IMP|IMPA|P29218	ENSG00000133731
RPS3	40S ribosomal protein S3 OS=Homo sapiens GN=RPS3 PE=1 SV=2	4	12	183	550000000	470000000	330000000	400000000	330000000	470000000	510000000	382500000	0.75	-0.415037	0.109778	0.959484	400000000	365000000	0.784314	0.715686	-0.350497	-0.482601	4	FALSE	TRUE	TRUE	266	411	64.7202	Tnon_mito	S3|P23396	ENSG00000149273
RPS3	40S ribosomal protein S3 (Fragment) OS=Homo sapiens GN=RPS3 PE=3 SV=1	1	9	136	130000000	53000000				36000000	91500000	9000000	0.0983607	-3.34577	0.264398	0.577742	18000000	0	0.196721	0	-2.34577		1	FALSE	TRUE	TRUE	266	411	64.7202	Tnon_mito	S3|P23396	ENSG00000149273
DNAJC21	Isoform 2 of DnaJ homolog subfamily C member 21 OS=Homo sapiens GN=DNAJC21	1	1	2				8900000		12000000	0	5225000	100	6.64386	0.188617	0.72442	6000000	4450000	100	100	6.64386	6.64386	2	FALSE	FALSE	FALSE	4	411	0.973236	Tnon_mito	DNAJA5|GS3|JJJ1|Q5F1R6	ENSG00000168724
PRKRA	Interferon-inducible double-stranded RNA-dependent protein kinase activator A OS=Homo sapiens GN=PRKRA PE=1 SV=1	4	4	10	49000000	25000000	31000000	42000000	450000000	35000000	37000000	139500000	3.77027	1.91467	0.396176	0.402111	242500000	246000000	6.55405	6.64865	2.71239	2.73306	4	FALSE	TRUE	TRUE	23	411	5.59611	Tnon_mito	DYT16|PACT|RAX|O75569	ENSG00000180228
SLC27A4	Long-chain fatty acid transport protein 4 OS=Homo sapiens GN=SLC27A4 PE=1 SV=1	1	1	1			19000000				0	4750000	100	6.64386	0.391002	0.407821	0	0	0	0			1	FALSE	FALSE	FALSE	2	411	0.486618	Tnon_mito	ACSVL4|FATP4|IPS|Q6P1M0	ENSG00000167114
NSDHL	Sterol-4-alpha-carboxylate 3-dehydrogenase, decarboxylating OS=Homo sapiens GN=NSDHL PE=1 SV=2	8	8	45	61000000	57000000	93000000	160000000	69000000	63000000	59000000	96250000	1.63136	0.706072	0.192081	0.716515	66000000	114500000	1.11864	1.94068	0.161751	0.956561	4	FALSE	TRUE	TRUE	10	411	2.43309	Tnon_mito	H105E3|SDR31E1|XAP104|Q15738	ENSG00000147383
TUBB2A	Tubulin beta-2A chain OS=Homo sapiens GN=TUBB2A PE=1 SV=1	1	22	487	82000000	68000000	41000000	51000000	36000000	24000000	75000000	38000000	0.506667	-0.980891	0.0400839	1.39703	30000000	43500000	0.4	0.58	-1.32193	-0.785875	4	TRUE	TRUE	TRUE	372	411	90.5109	Tnon_mito	TUBB|TUBB2|dJ40E16.7|Q13885	ENSG00000137267
FKBP2	Peptidyl-prolyl cis-trans isomerase FKBP2 OS=Homo sapiens GN=FKBP2 PE=1 SV=2	3	3	18	110000000	80000000	56000000	84000000	53000000	86000000	95000000	69750000	0.734211	-0.445734	0.300776	0.521757	69500000	68500000	0.731579	0.721053	-0.450915	-0.471824	4	FALSE	TRUE	TRUE	4	411	0.973236	Tnon_mito	FKBP-13|PPIase|P26885	ENSG00000173486
PRDX2	Peroxiredoxin-2 OS=Homo sapiens GN=PRDX2 PE=1 SV=5	7	8	69	230000000	340000000	140000000	230000000	110000000	130000000	285000000	152500000	0.535088	-0.902153	0.203708	0.690992	120000000	170000000	0.421053	0.596491	-1.24793	-0.745427	4	FALSE	TRUE	TRUE	205	411	49.8783	Tmito	HEL-S-2a|NKEF-B|NKEFB|PRP|PRX2|PRXII|PTX1|TDPX1|TPX1|TSA|P32119	ENSG00000167815
TXN	Thioredoxin OS=Homo sapiens GN=TXN PE=1 SV=3	3	3	34	640000000	390000000	130000000	140000000	200000000	97000000	515000000	141750000	0.275243	-1.86122	0.197089	0.705337	148500000	170000000	0.28835	0.330097	-1.79411	-1.59904	4	FALSE	TRUE	TRUE	174	411	42.3358	Tpossible_mito	TRDX|TRX|TRX1|P10599	ENSG00000136810
CCT3	T-complex protein 1 subunit gamma OS=Homo sapiens GN=CCT3 PE=1 SV=4	26	26	199	660000000	760000000	360000000	440000000	300000000	360000000	710000000	365000000	0.514085	-0.959923	0.0384065	1.4156	330000000	370000000	0.464789	0.521127	-1.10535	-0.940294	4	TRUE	TRUE	TRUE	165	411	40.146	Tnon_mito	CCT-gamma|CCTG|PIG48|TCP-1-gamma|TRIC5|P49368	ENSG00000163468
AHCY	Adenosylhomocysteinase OS=Homo sapiens GN=AHCY PE=1 SV=4	14	14	53	210000000	190000000	97000000	110000000	91000000	67000000	200000000	91250000	0.45625	-1.1321	0.00583626	2.23387	79000000	100500000	0.395	0.5025	-1.34008	-0.992804	4	TRUE	TRUE	TRUE	98	411	23.8443	Tnon_mito	SAHH|adoHcyase|P23526	ENSG00000101444
BPNT1	Isoform 2 of 3'(2'),5'-bisphosphate nucleotidase 1 OS=Homo sapiens GN=BPNT1	2	2	2	22000000						11000000	0	0		0.5	0.30103	0	0	0	0			0	FALSE	FALSE	FALSE	5	411	1.21655	Tnon_mito	HEL20|PIP|O95861	ENSG00000162813
SUGT1	Suppressor of G2 allele of SKP1 homolog OS=Homo sapiens GN=SUGT1 PE=1 SV=3	11	11	31	43000000	44000000	61000000	66000000	19000000	20000000	43500000	41500000	0.954023	-0.0679041	0.885323	0.0528981	19500000	42500000	0.448276	0.977011	-1.15754	-0.0335526	4	FALSE	TRUE	TRUE	39	411	9.48905	Tnon_mito	SGT1|Q9Y2Z0	ENSG00000165416
FLOT1	Flotillin-1 OS=Homo sapiens GN=FLOT1 PE=1 SV=3	1	1	1						13000000	0	3250000	100	6.64386	0.391002	0.407821	6500000	0	100	0	6.64386		1	FALSE	FALSE	FALSE	16	411	3.89294	Tnon_mito	O75955	ENSG00000137312
GNPAT	Dihydroxyacetone phosphate acyltransferase OS=Homo sapiens GN=GNPAT PE=1 SV=1	9	9	18	18000000	21000000	39000000	63000000	24000000	31000000	19500000	39250000	2.01282	1.00922	0.100835	0.996389	27500000	43500000	1.41026	2.23077	0.495957	1.15754	4	FALSE	TRUE	TRUE	5	411	1.21655	Tpossible_mito	DAP-AT|DAPAT|DHAPAT|O15228	ENSG00000116906
MAT2B	Methionine adenosyltransferase 2 subunit beta OS=Homo sapiens GN=MAT2B PE=1 SV=1	2	2	2	34000000						17000000	0	0		0.5	0.30103	0	0	0	0			0	FALSE	FALSE	FALSE	15	411	3.64964	Tpossible_mito	MAT-II|MATIIbeta|Nbla02999|SDR23E1|TGR|Q9NZL9	ENSG00000038274
PRMT1	Protein arginine N-methyltransferase 1 OS=Homo sapiens GN=PRMT1 PE=4 SV=1	12	12	57	170000000	130000000	91000000	100000000	78000000	94000000	150000000	90750000	0.605	-0.724993	0.192067	0.716548	86000000	89000000	0.573333	0.593333	-0.802554	-0.753085	4	FALSE	TRUE	TRUE	123	411	29.927	Tnon_mito	ANM1|HCP1|HRMT1L2|IR1B4|Q99873	ENSG00000126457
RAB21	Ras-related protein Rab-21 OS=Homo sapiens GN=RAB21 PE=1 SV=3	2	2	9			45000000	48000000	42000000	47000000	0	45500000	100	6.64386	5.40348e-05	4.26733	44500000	45000000	100	100	6.64386	6.64386	4	TRUE	FALSE	TRUE	27	411	6.56934	Tnon_mito	Q9UL25	ENSG00000080371
NARS	Asparagine--tRNA ligase, cytoplasmic OS=Homo sapiens GN=NARS PE=1 SV=1	4	4	7	60000000	30000000	24000000	17000000			45000000	10250000	0.227778	-2.1343	0.223508	0.650708	0	8500000	0	0.188889		-2.40439	2	FALSE	TRUE	TRUE	30	411	7.29927	Tpossible_mito	ASNRS|NARS1|O43776	ENSG00000134440
PSMC6	26S protease regulatory subunit 10B OS=Homo sapiens GN=PSMC6 PE=1 SV=1	7	7	35	91000000	110000000	79000000	110000000	42000000	46000000	100500000	69250000	0.689055	-0.53731	0.167105	0.777012	44000000	76000000	0.437811	0.756219	-1.19162	-0.403124	4	FALSE	TRUE	TRUE	89	411	21.6545	Tnon_mito	CADP44|HEL-S-73|P44|SUG2|p42|P62333	ENSG00000100519
PSMB1	Proteasome subunit beta type-1 OS=Homo sapiens GN=PSMB1 PE=1 SV=2	8	8	24	86000000	75000000	50000000	36000000	58000000	16000000	80500000	40000000	0.496894	-1.00899	0.0195023	1.70992	37000000	47000000	0.459627	0.583851	-1.12146	-0.776328	4	TRUE	TRUE	TRUE	76	411	18.4915	Tnon_mito	HC5|PMSB1|PSC5|P20618	ENSG00000008018
ASAH1	Isoform 2 of Acid ceramidase OS=Homo sapiens GN=ASAH1	2	2	7	22000000	26000000	26000000	35000000	30000000	30000000	24000000	30250000	1.26042	0.333901	0.112921	0.947226	30000000	32500000	1.25	1.35417	0.321928	0.437405	4	FALSE	FALSE	TRUE	6	411	1.45985	Tnon_mito	AC|ACDase|ASAH|PHP|PHP32|SMAPME|Q13510	ENSG00000104763
PPT1	Palmitoyl-protein thioesterase 1 OS=Homo sapiens GN=PPT1 PE=1 SV=1	6	6	23	72000000	59000000	66000000	100000000	67000000	150000000	65500000	95750000	1.46183	0.547778	0.227497	0.643024	108500000	83500000	1.65649	1.27481	0.728128	0.350281	4	FALSE	TRUE	TRUE	5	411	1.21655	Tnon_mito	CLN1|INCL|PPT|P50897	ENSG00000131238
FAM213A	Redox-regulatory protein FAM213A OS=Homo sapiens GN=FAM213A PE=1 SV=3	4	4	26	70000000	90000000	120000000	170000000	76000000	73000000	80000000	109750000	1.37187	0.456149	0.30028	0.522473	74500000	123000000	0.93125	1.5375	-0.10276	0.620586	4	FALSE	TRUE	TRUE	2	411	0.486618	Tmito	C10orf58|PAMM|Q9BRX8	ENSG00000122378
USMG5	Up-regulated during skeletal muscle growth protein 5 OS=Homo sapiens GN=USMG5 PE=1 SV=1	1	1	6	43000000	26000000	48000000	48000000	40000000	52000000	34500000	47000000	1.36232	0.446064	0.365792	0.436766	46000000	44000000	1.33333	1.27536	0.415037	0.350907	4	FALSE	FALSE	TRUE	15	411	3.64964	Tmito	DAPIT|HCVFTP2|bA792D24.4|Q96IX5	ENSG00000173915
RPL8	60S ribosomal protein L8 OS=Homo sapiens GN=RPL8 PE=1 SV=2	6	6	90	790000000	750000000	770000000	790000000	610000000	800000000	770000000	742500000	0.964286	-0.0524674	0.604796	0.218391	705000000	700000000	0.915584	0.909091	-0.127235	-0.137504	4	FALSE	TRUE	TRUE	157	411	38.1995	Tnon_mito	L8|P62917	ENSG00000161016
DDT	D-dopachrome decarboxylase OS=Homo sapiens GN=DDT PE=2 SV=1	1	1	3	160000000	110000000			41000000		135000000	10250000	0.0759259	-3.71926	0.0868875	1.06104	20500000	20500000	0.151852	0.151852	-2.71926	-2.71926	1	FALSE	FALSE	FALSE	13	411	3.16302	Tnon_mito	DDCT|P30046	ENSG00000099977
RRM1	Ribonucleoside-diphosphate reductase large subunit OS=Homo sapiens GN=RRM1 PE=1 SV=1	9	9	19	54000000	78000000	33000000	17000000	23000000	22000000	66000000	23750000	0.359848	-1.47454	0.154586	0.810829	22500000	20000000	0.340909	0.30303	-1.55254	-1.72247	4	FALSE	TRUE	TRUE	22	411	5.3528	Tnon_mito	R1|RIR1|RR1|P23921	ENSG00000167325
RPS15	40S ribosomal protein S15 OS=Homo sapiens GN=RPS15 PE=3 SV=1	4	4	49	220000000	200000000	230000000	270000000	200000000	130000000	210000000	207500000	0.988095	-0.017278	0.940389	0.0266927	165000000	235000000	0.785714	1.11905	-0.347923	0.162271	4	FALSE	TRUE	TRUE	126	411	30.6569	Tnon_mito	RIG|S15|P62841	ENSG00000115268
RPS15A	40S ribosomal protein S15a OS=Homo sapiens GN=RPS15A PE=1 SV=2	3	6	41	210000000	330000000	240000000	98000000	130000000	120000000	270000000	147000000	0.544444	-0.877143	0.242471	0.61534	125000000	114000000	0.462963	0.422222	-1.11103	-1.24393	4	FALSE	TRUE	TRUE	178	411	43.309	Tmito	S15a|P62244	ENSG00000134419
CRYZ	Quinone oxidoreductase OS=Homo sapiens GN=CRYZ PE=1 SV=1	4	4	8	18000000	13000000	48000000	45000000	16000000	25000000	15500000	33500000	2.16129	1.11189	0.100371	0.998393	20500000	30500000	1.32258	1.96774	0.403356	0.976541	4	FALSE	TRUE	TRUE	20	411	4.86618	Tmito	Q08257	ENSG00000116791
PYCR1	Isoform 3 of Pyrroline-5-carboxylate reductase 1, mitochondrial OS=Homo sapiens GN=PYCR1	4	5	32	110000000	77000000	110000000	110000000	70000000	74000000	93500000	91000000	0.973262	-0.0390998	0.911429	0.040277	72000000	90000000	0.770053	0.962567	-0.376969	-0.0550414	4	FALSE	TRUE	TRUE	17	411	4.13625	Tmito	ARCL2B|ARCL3B|P5C|P5CR|PIG45|PP222|PRO3|PYCR|P32322	ENSG00000183010
PPA1	Inorganic pyrophosphatase OS=Homo sapiens GN=PPA1 PE=1 SV=2	11	12	69	340000000	240000000	86000000	130000000	98000000	94000000	290000000	102000000	0.351724	-1.50748	0.154496	0.811082	96000000	114000000	0.331034	0.393103	-1.59495	-1.34702	4	FALSE	TRUE	TRUE	73	411	17.7616	Tnon_mito	HEL-S-66p|IOPPP|PP|PP1|SID6-8061|Q15181	ENSG00000180817
TUBB4B	Tubulin beta-4B chain OS=Homo sapiens GN=TUBB4B PE=1 SV=1	4	24	663	840000000	790000000	370000000	610000000	460000000	200000000	815000000	410000000	0.503067	-0.991176	0.0146995	1.8327	330000000	535000000	0.404908	0.656442	-1.30433	-0.607261	4	TRUE	TRUE	TRUE	376	411	91.4842	Tnon_mito	Beta2|TUBB2|TUBB2C|P68371	ENSG00000188229
RPL10A	60S ribosomal protein L10a OS=Homo sapiens GN=RPL10A PE=1 SV=2	8	8	76	610000000	650000000	540000000	650000000	590000000	650000000	630000000	607500000	0.964286	-0.0524674	0.538143	0.269102	620000000	620000000	0.984127	0.984127	-0.0230836	-0.0230836	4	FALSE	TRUE	TRUE	117	411	28.4672	Tmito	Csa-19|L10A|NEDD6|P62906	ENSG00000198755
RPL9	60S ribosomal protein L9 OS=Homo sapiens GN=RPL9 PE=1 SV=1	9	9	141	560000000	590000000	410000000	730000000	400000000	390000000	575000000	482500000	0.83913	-0.253033	0.34664	0.460122	395000000	565000000	0.686957	0.982609	-0.541709	-0.0253111	4	FALSE	TRUE	TRUE	167	411	40.6326	Tnon_mito	L9|NPC-A-16|P32969	ENSG00000163682
RPL23A	60S ribosomal protein L23a OS=Homo sapiens GN=RPL23A PE=3 SV=1	9	9	73	1000000000	630000000	680000000	470000000	510000000	700000000	815000000	590000000	0.723926	-0.466085	0.42631	0.370274	605000000	490000000	0.742331	0.601227	-0.429865	-0.734018	4	FALSE	TRUE	TRUE	224	411	54.5012	Tnon_mito	L23A|MDA20|P62750	ENSG00000198242
EIF5B	Eukaryotic translation initiation factor 5B OS=Homo sapiens GN=EIF5B PE=1 SV=4	26	26	127	200000000	190000000	120000000	260000000	200000000	150000000	195000000	182500000	0.935897	-0.0955777	0.713062	0.146873	175000000	230000000	0.897436	1.17949	-0.156119	0.23816	4	FALSE	TRUE	TRUE	86	411	20.9246	Tnon_mito	IF2|O60841	ENSG00000158417
SEC63	Translocation protein SEC63 homolog OS=Homo sapiens GN=SEC63 PE=1 SV=2	5	5	16		51000000	31000000	30000000	54000000	40000000	25500000	38750000	1.51961	0.603699	0.694845	0.158112	47000000	42000000	1.84314	1.64706	0.882164	0.719892	4	FALSE	TRUE	TRUE	11	411	2.6764	Tnon_mito	DNAJC23|ERdj2|PRO2507|SEC63L|Q9UGP8	ENSG00000025796
TUBB	Tubulin beta chain OS=Homo sapiens GN=TUBB PE=1 SV=2	4	24	745	2600000000	2800000000	1200000000	810000000	1400000000	1200000000	2700000000	1152500000	0.426852	-1.22819	0.00104105	2.98253	1300000000	1105000000	0.481481	0.409259	-1.05445	-1.28891	4	TRUE	TRUE	TRUE	382	411	92.944	Tnon_mito	M40|OK/SW-cl.56|TUBB1|TUBB5|P07437	ENSG00000183311
RAB8B	Ras-related protein Rab-8B OS=Homo sapiens GN=RAB8B PE=1 SV=2	1	3	94		7400000				1900000	3700000	475000	0.128378	-2.96153	0.542404	0.265677	950000	0	0.256757	0	-1.96153		1	FALSE	TRUE	TRUE	47	411	11.4355	Tpossible_mito	Q92930	ENSG00000166128
HAX1	Isoform 2 of HCLS1-associated protein X-1 OS=Homo sapiens GN=HAX1	4	4	6	34000000		26000000	52000000			17000000	19500000	1.14706	0.197939	0.915702	0.038246	0	26000000	0	1.52941		0.612977	2	FALSE	TRUE	TRUE	29	411	7.05596	Tpossible_mito	HCLSBP1|HS1BP1|SCN3|O00165	ENSG00000143575
TOMM20	Mitochondrial import receptor subunit TOM20 homolog OS=Homo sapiens GN=TOMM20 PE=1 SV=1	1	1	1					15000000		0	3750000	100	6.64386	0.391002	0.407821	7500000	7500000	100	100	6.64386	6.64386	1	FALSE	FALSE	FALSE	5	411	1.21655	Tmito	MAS20|MOM19|TOM20|Q15388	ENSG00000173726
APEH	Acylamino-acid-releasing enzyme OS=Homo sapiens GN=APEH PE=2 SV=1	1	1	1		24000000					12000000	0	0		0.5	0.30103	0	0	0	0			0	FALSE	FALSE	FALSE	11	411	2.6764	Tnon_mito	AARE|ACPH|APH|D3F15S2|D3S48E|DNF15S2|OPH|P13798	ENSG00000164062
PIN1	Peptidyl-prolyl cis-trans isomerase NIMA-interacting 1 OS=Homo sapiens GN=PIN1 PE=1 SV=1	1	1	4	42000000	29000000	28000000				35500000	7000000	0.197183	-2.34239	0.0534231	1.27227	0	0	0	0			1	FALSE	FALSE	FALSE	25	411	6.08273	Tnon_mito	DOD|UBL5|Q13526	ENSG00000127445
PSMB5	Proteasome subunit beta type-5 OS=Homo sapiens GN=PSMB5 PE=1 SV=3	8	8	46	140000000	120000000	81000000	86000000	71000000	88000000	130000000	81500000	0.626923	-0.67364	0.0945107	1.02452	79500000	78500000	0.611538	0.603846	-0.709485	-0.727747	4	FALSE	TRUE	TRUE	92	411	22.3844	Tnon_mito	LMPX|MB1|X|P28074	ENSG00000100804
RPS14	40S ribosomal protein S14 OS=Homo sapiens GN=RPS14 PE=1 SV=3	9	9	134	1400000000	1100000000	1200000000	1600000000	1200000000	1400000000	1250000000	1350000000	1.08	0.111031	0.633951	0.197944	1300000000	1400000000	1.04	1.12	0.0565835	0.163499	4	FALSE	TRUE	TRUE	259	411	63.017	Tmito	EMTB|S14|P62263	ENSG00000164587
PCBD1	Pterin-4-alpha-carbinolamine dehydratase OS=Homo sapiens GN=PCBD1 PE=1 SV=2	2	2	5	13000000	11000000	9400000	10000000	21000000		12000000	10100000	0.841667	-0.248679	0.693124	0.159189	10500000	15500000	0.875	1.29167	-0.192645	0.369234	3	FALSE	FALSE	TRUE	10	411	2.43309	Tnon_mito	DCOH|PCBD|PCD|PHS|P61457	ENSG00000166228
YRDC	YrdC domain-containing protein, mitochondrial OS=Homo sapiens GN=YRDC PE=1 SV=1	1	1	1							0	0	100	6.64386			0	0	0	0			0		FALSE	FALSE	1	411	0.243309	Tpossible_mito	DRIP3|IRIP|RP11-109P14.4|SUA5|Q86U90	ENSG00000196449
RPL23	60S ribosomal protein L23 OS=Homo sapiens GN=RPL23 PE=1 SV=1	5	5	74	800000000	840000000	750000000	840000000	570000000	380000000	820000000	635000000	0.77439	-0.368867	0.166382	0.778894	475000000	705000000	0.579268	0.859756	-0.787696	-0.218001	4	FALSE	TRUE	TRUE	243	411	59.1241	Tpossible_mito	L23|rpL17|P62829	ENSG00000125691
PFKL	Isoform 2 of 6-phosphofructokinase, liver type OS=Homo sapiens GN=PFKL	2	2	3	42000000	68000000		34000000			55000000	8500000	0.154545	-2.6939	0.100558	0.997584	0	17000000	0	0.309091		-1.6939	1	FALSE	FALSE	FALSE	67	411	16.3017	Tnon_mito	PFK-B|P17858	ENSG00000141959
ABCF1	ATP-binding cassette sub-family F member 1 OS=Homo sapiens GN=ABCF1 PE=1 SV=2	16	16	82	120000000	120000000	110000000	170000000	81000000	77000000	120000000	109500000	0.9125	-0.132104	0.658256	0.181605	79000000	125500000	0.658333	1.04583	-0.60311	0.064653	4	FALSE	TRUE	TRUE	87	411	21.1679	Tnon_mito	ABC27|ABC50|Q8NE71	ENSG00000204574
DARS	Aspartate--tRNA ligase, cytoplasmic OS=Homo sapiens GN=DARS PE=1 SV=2	18	18	85	250000000	190000000	98000000	140000000	120000000	130000000	220000000	122000000	0.554545	-0.850622	0.164839	0.78294	125000000	130000000	0.568182	0.590909	-0.815575	-0.758992	4	FALSE	TRUE	TRUE	121	411	29.4404	Tnon_mito	HBSL|P14868	ENSG00000115866
IARS	Isoleucine--tRNA ligase, cytoplasmic OS=Homo sapiens GN=IARS PE=1 SV=2	25	25	106	170000000	110000000	60000000	110000000	65000000	75000000	140000000	77500000	0.553571	-0.853159	0.255013	0.593437	70000000	87500000	0.5	0.625	-1	-0.678072	4	FALSE	TRUE	TRUE	106	411	25.7908	Tnon_mito	IARS1|ILERS|ILRS|IRS|PRO0785|P41252	ENSG00000196305
PSMB2	Proteasome subunit beta type-2 OS=Homo sapiens GN=PSMB2 PE=1 SV=1	9	9	35	110000000	92000000	64000000	86000000	56000000	48000000	101000000	63500000	0.628713	-0.669527	0.0615216	1.21097	52000000	71000000	0.514851	0.70297	-0.957772	-0.508464	4	FALSE	TRUE	TRUE	72	411	17.5182	Tnon_mito	HC7-I|P49721	ENSG00000126067
RPL5	60S ribosomal protein L5 OS=Homo sapiens GN=RPL5 PE=1 SV=3	10	10	111	430000000	270000000	390000000	420000000	330000000	270000000	350000000	352500000	1.00714	0.0102683	0.980622	0.00849845	300000000	375000000	0.857143	1.07143	-0.222392	0.0995357	4	FALSE	TRUE	TRUE	156	411	37.9562	Tnon_mito	DBA6|L5|P46777	ENSG00000122406
CHP1	Calcineurin B homologous protein 1 OS=Homo sapiens GN=CHP1 PE=1 SV=3	2	2	6			23000000	36000000	16000000	24000000	0	24750000	100	6.64386	0.00943683	2.02517	20000000	26000000	100	100	6.64386	6.64386	4	TRUE	FALSE	TRUE	3	411	0.729927	Tnon_mito	CHP|SLC9A1BP|Sid470p|p22|p24|Q99653	ENSG00000187446
COA7	Cytochrome c oxidase assembly factor 7 OS=Homo sapiens GN=COA7 PE=1 SV=2	3	3	17	61000000	61000000	55000000	92000000	57000000	56000000	61000000	65000000	1.06557	0.0916305	0.687124	0.162965	56500000	74500000	0.92623	1.22131	-0.110558	0.288431	4	FALSE	TRUE	TRUE				Tmito	C1orf163|RESA1|SELRC1|Q96BR5	ENSG00000162377
AK1	Adenylate kinase isoenzyme 1 OS=Homo sapiens GN=AK1 PE=2 SV=1	2	2	5	30000000	15000000	6500000	10000000			22500000	4125000	0.183333	-2.44746	0.219891	0.657793	0	5000000	0	0.222222		-2.16993	2	FALSE	FALSE	TRUE	5	411	1.21655	Tnon_mito	HTL-S-58j|P00568	ENSG00000106992
RAB18	Ras-related protein Rab-18 OS=Homo sapiens GN=RAB18 PE=1 SV=1	6	6	25	44000000	32000000	35000000	56000000	33000000	50000000	38000000	43500000	1.14474	0.195016	0.55473	0.255919	41500000	44500000	1.09211	1.17105	0.127112	0.227806	4	FALSE	TRUE	TRUE	12	411	2.91971	Tnon_mito	RAB18LI1|WARBM3|Q9NP72	ENSG00000099246
NME1-NME2	Nucleoside diphosphate kinase OS=Homo sapiens GN=NME1-NME2 PE=2 SV=1	3	9	81	87000000	320000000	150000000	99000000	35000000	150000000	203500000	108500000	0.53317	-0.907334	0.561694	0.2505	92500000	67000000	0.454545	0.329238	-1.1375	-1.6028	4	FALSE	TRUE	TRUE	93	411	22.6277	Tpossible_mito	NM23-LV|NMELV	ENSG00000011052
XRCC6	X-ray repair cross-complementing protein 6 OS=Homo sapiens GN=XRCC6 PE=1 SV=2	28	28	207	380000000	320000000	330000000	370000000	270000000	310000000	350000000	320000000	0.914286	-0.129283	0.496298	0.304258	290000000	320000000	0.828571	0.914286	-0.271302	-0.129283	4	FALSE	TRUE	TRUE	176	411	42.8224	Tnon_mito	CTC75|CTCBF|G22P1|KU70|ML8|TLAA|P12956	ENSG00000196419
ELP3	Elongator complex protein 3 OS=Homo sapiens GN=ELP3 PE=1 SV=2	1	1	1	30000000						15000000	0	0		0.5	0.30103	0	0	0	0			0	FALSE	FALSE	FALSE	13	411	3.16302	Tnon_mito	KAT9|Q9H9T3	ENSG00000134014
LPCAT1	Lysophosphatidylcholine acyltransferase 1 OS=Homo sapiens GN=LPCAT1 PE=1 SV=2	5	5	22	45000000	67000000	66000000	52000000	42000000	47000000	56000000	51750000	0.924107	-0.113868	0.770198	0.113398	44500000	47000000	0.794643	0.839286	-0.331621	-0.252766	4	FALSE	TRUE	TRUE	7	411	1.70316	Tnon_mito	AYTL2|PFAAP3|lpcat|Q8NF37	ENSG00000153395
TMX3	Protein disulfide-isomerase TMX3 OS=Homo sapiens GN=TMX3 PE=1 SV=2	1	1	2					24000000	35000000	0	14750000	100	6.64386	0.192565	0.715424	29500000	12000000	100	100	6.64386	6.64386	2	FALSE	FALSE	FALSE	3	411	0.729927	Tnon_mito	PDIA13|TXNDC10|Q96JJ7	ENSG00000166479
METTL2B	Methyltransferase-like protein 2B OS=Homo sapiens GN=METTL2B PE=1 SV=3	1	1	1						8500000	0	2125000	100	6.64386	0.391002	0.407821	4250000	0	100	0	6.64386		1	FALSE	FALSE	FALSE	1	411	0.243309	Tnon_mito	METL|METTL2|METTL2A|PSENIP1|Q6P1Q9	ENSG00000165055
XPNPEP1	Isoform 3 of Xaa-Pro aminopeptidase 1 OS=Homo sapiens GN=XPNPEP1	2	2	3	24000000	25000000					24500000	0	0		0.0129904	1.88638	0	0	0	0			0	TRUE	FALSE	FALSE	6	411	1.45985	Tnon_mito	APP1|SAMP|XPNPEP|XPNPEPL|XPNPEPL1|Q9NQW7	ENSG00000108039
EEF1A1	Elongation factor 1-alpha 1 OS=Homo sapiens GN=EEF1A1 PE=1 SV=1	9	16	496	4200000000	4700000000	4500000000	7300000000	3500000000	2400000000	4450000000	4425000000	0.994382	-0.00812788	0.982843	0.00751571	2950000000	5400000000	0.662921	1.21348	-0.59309	0.279154	4	FALSE	TRUE	TRUE	350	411	85.1582	Tnon_mito	CCS-3|CCS3|EE1A1|EEF-1|EEF1A|EF-Tu|EF1A|GRAF-1EF|HNGC:16303|LENG7|PTI1|eEF1A-1|P68104	ENSG00000156508
UBXN1	Isoform 2 of UBX domain-containing protein 1 OS=Homo sapiens GN=UBXN1	1	1	2	39000000	37000000					38000000	0	0		0.0167493	1.776	0	0	0	0			0	TRUE	FALSE	FALSE	6	411	1.45985	Tnon_mito	2B28|SAKS1|UBXD10|Q04323	ENSG00000162191
SCCPDH	Saccharopine dehydrogenase-like oxidoreductase OS=Homo sapiens GN=SCCPDH PE=1 SV=1	2	2	2			13000000				0	3250000	100	6.64386	0.391002	0.407821	0	0	0	0			1	FALSE	FALSE	FALSE	7	411	1.70316	Tmito	NET11|RP11-439E19.2|Q8NBX0	ENSG00000143653
RAB1B	Ras-related protein Rab-1B OS=Homo sapiens GN=RAB1B PE=1 SV=1	4	10	167	88000000	58000000	81000000	78000000	56000000	71000000	73000000	71500000	0.979452	-0.0299532	0.937758	0.027909	63500000	67000000	0.869863	0.917808	-0.20114	-0.123735	4	FALSE	TRUE	TRUE	69	411	16.7883	Tpossible_mito	Q9H0U4	ENSG00000174903
CTSD	Cathepsin D OS=Homo sapiens GN=CTSD PE=1 SV=1	12	12	73	180000000	92000000	110000000	200000000	120000000	100000000	136000000	132500000	0.974265	-0.0376143	0.951634	0.02153	110000000	160000000	0.808824	1.17647	-0.306103	0.234465	4	FALSE	TRUE	TRUE	39	411	9.48905	Tpossible_mito	CLN10|CPSD|HEL-S-130P|P07339	ENSG00000117984
FADS2	Fatty acid desaturase 2 OS=Homo sapiens GN=FADS2 PE=1 SV=1	1	1	1						26000000	0	6500000	100	6.64386	0.391002	0.407821	13000000	0	100	0	6.64386		1	FALSE	FALSE	FALSE	1	411	0.243309	Tpossible_mito	D6D|DES6|FADSD6|LLCDL2|SLL0262|TU13|O95864	ENSG00000134824
LIG3	DNA ligase 3 OS=Homo sapiens GN=LIG3 PE=1 SV=2	3	3	6		14000000	14000000		9900000	16000000	7000000	9975000	1.425	0.510962	0.750247	0.124796	12950000	4950000	1.85	0.707143	0.887525	-0.499926	3	FALSE	TRUE	TRUE	20	411	4.86618	Tpossible_mito	LIG2|P49916	ENSG00000005156
CMPK1	UMP-CMP kinase OS=Homo sapiens GN=CMPK1 PE=1 SV=3	2	2	3	34000000	17000000					25500000	0	0		0.204833	0.688601	0	0	0	0			0	FALSE	FALSE	FALSE	9	411	2.18978	Tnon_mito	CK|CMK|CMPK|UMK|UMP-CMPK|UMPK|P30085	ENSG00000162368
LRBA	Lipopolysaccharide-responsive and beige-like anchor protein OS=Homo sapiens GN=LRBA PE=1 SV=4	5	5	16	22000000	16000000	13000000	18000000	14000000	13000000	19000000	14500000	0.763158	-0.389947	0.351409	0.454187	13500000	16000000	0.710526	0.842105	-0.49304	-0.247928	4	FALSE	TRUE	TRUE	20	411	4.86618	Tnon_mito	BGL|CDC4L|CVID8|LAB300|LBA|P50851	ENSG00000198589
SLIT2	Slit homolog 2 protein OS=Homo sapiens GN=SLIT2 PE=1 SV=1	2	2	2	72000000	27000000					49500000	0	0		0.271599	0.566071	0	0	0	0			0	FALSE	FALSE	FALSE	3	411	0.729927	Tnon_mito	SLIL3|Slit-2|O94813	ENSG00000145147
TUBG1	Tubulin gamma-1 chain OS=Homo sapiens GN=TUBG1 PE=1 SV=2	8	8	27	71000000	54000000	55000000	64000000	34000000	38000000	62500000	47750000	0.764	-0.388355	0.291926	0.534727	36000000	49000000	0.576	0.784	-0.795859	-0.351074	4	FALSE	TRUE	TRUE	47	411	11.4355	Tnon_mito	CDCBM4|GCP-1|TUBG|TUBGCP1|P23258	ENSG00000131462
NTMT1	N-terminal Xaa-Pro-Lys N-methyltransferase 1 OS=Homo sapiens GN=NTMT1 PE=1 SV=3	1	1	3		24000000	16000000	21000000			12000000	9250000	0.770833	-0.375509	0.860412	0.0652934	0	10500000	0	0.875		-0.192645	2	FALSE	FALSE	FALSE	1	411	0.243309	Tnon_mito	AD-003|C9orf32|HOMT1A|METTL11A|NRMT|NTM1A|Q9BV86	ENSG00000148335
RPL11	60S ribosomal protein L11 OS=Homo sapiens GN=RPL11 PE=1 SV=2	8	8	76	640000000	460000000	450000000	630000000	520000000	420000000	550000000	505000000	0.918182	-0.123148	0.710563	0.148397	470000000	575000000	0.854545	1.04545	-0.226771	0.0641303	4	FALSE	TRUE	TRUE	209	411	50.8516	Tnon_mito	DBA7|GIG34|L11|P62913	ENSG00000142676
RSU1	Ras suppressor protein 1 OS=Homo sapiens GN=RSU1 PE=1 SV=3	1	1	2		13000000		14000000			6500000	3500000	0.538462	-0.893085	0.73176	0.135631	0	7000000	0	1.07692		0.106915	1	FALSE	FALSE	FALSE	12	411	2.91971	Tnon_mito	RSP-1|Q15404	ENSG00000148484
PHPT1	14 kDa phosphohistidine phosphatase OS=Homo sapiens GN=PHPT1 PE=1 SV=1	1	1	3	33000000	27000000			7300000		30000000	1825000	0.0608333	-4.03899	0.0205845	1.68646	3650000	3650000	0.121667	0.121667	-3.03899	-3.03899	1	TRUE	FALSE	FALSE	2	411	0.486618	Tnon_mito	CGI-202|HEL-S-132P|HSPC141|PHP14|Q9NRX4	ENSG00000054148
PEX1	Peroxisome biogenesis factor 1 OS=Homo sapiens GN=PEX1 PE=1 SV=1	1	1	1				37000000			0	9250000	100	6.64386	0.391002	0.407821	0	18500000	0	100		6.64386	1	FALSE	FALSE	FALSE	2	411	0.486618	Tnon_mito	PBD1A|PBD1B|ZWS|ZWS1|O43933	ENSG00000127980
LAS1L	Ribosomal biogenesis protein LAS1L OS=Homo sapiens GN=LAS1L PE=1 SV=2	1	1	6	14000000	13000000	18000000	19000000	13000000	16000000	13500000	16500000	1.22222	0.289507	0.106936	0.970878	14500000	16000000	1.07407	1.18519	0.103093	0.245112	4	FALSE	FALSE	TRUE	50	411	12.1655	Tnon_mito	Las1-like|dJ475B7.2|Q9Y4W2	ENSG00000001497
DPM1	Dolichol-phosphate mannosyltransferase subunit 1 (Fragment) OS=Homo sapiens GN=DPM1 PE=4 SV=1	4	4	14	41000000	36000000	72000000	130000000	53000000	50000000	38500000	76250000	1.98052	0.985879	0.13417	0.872343	51500000	91500000	1.33766	2.37662	0.419714	1.24891	4	FALSE	TRUE	TRUE	28	411	6.81265	Tnon_mito	CDGIE|MPDS|O60762	ENSG00000000419
NPLOC4	Isoform 2 of Nuclear protein localization protein 4 homolog OS=Homo sapiens GN=NPLOC4	5	5	18	43000000	35000000	28000000	28000000	24000000	22000000	39000000	25500000	0.653846	-0.612977	0.147936	0.829927	23000000	26000000	0.589744	0.666667	-0.76184	-0.584963	4	FALSE	TRUE	TRUE	24	411	5.83942	Tnon_mito	NPL4|Q8TAT6	ENSG00000182446
FASTKD5	FAST kinase domain-containing protein 5 OS=Homo sapiens GN=FASTKD5 PE=1 SV=1	4	4	8		15000000	27000000	37000000		20000000	7500000	21000000	2.8	1.48543	0.298041	0.525724	10000000	18500000	1.33333	2.46667	0.415037	1.30256	3	FALSE	TRUE	TRUE	7	411	1.70316	Tmito	dJ1187M17.5|Q7L8L6	ENSG00000215251
PARK7	Protein DJ-1 OS=Homo sapiens GN=PARK7 PE=1 SV=2	9	9	62	540000000	350000000	150000000	230000000	210000000	160000000	445000000	187500000	0.421348	-1.24691	0.213399	0.670807	185000000	220000000	0.41573	0.494382	-1.26628	-1.0163	4	FALSE	TRUE	TRUE	58	411	14.1119	Tmito	DJ-1|DJ1|HEL-S-67p|Q99497	ENSG00000116288
RARS	Arginine--tRNA ligase, cytoplasmic OS=Homo sapiens GN=RARS PE=1 SV=2	19	19	88	170000000	140000000	82000000	94000000	110000000	81000000	155000000	91750000	0.591935	-0.756488	0.101842	0.992071	95500000	102000000	0.616129	0.658065	-0.698696	-0.603699	4	FALSE	TRUE	TRUE	110	411	26.764	Tmito	ArgRS|DALRD1|P54136	ENSG00000113643
TXNL1	Thioredoxin-like protein 1 OS=Homo sapiens GN=TXNL1 PE=1 SV=3	3	3	8	39000000	58000000	26000000	29000000	23000000		48500000	19500000	0.402062	-1.31451	0.126481	0.897973	11500000	26000000	0.237113	0.536082	-2.07635	-0.899473	3	FALSE	TRUE	TRUE	48	411	11.6788	Tnon_mito	HEL-S-114|TRP32|TXL-1|TXNL|Txl|O43396	ENSG00000091164
HBS1L	HBS1-like protein OS=Homo sapiens GN=HBS1L PE=1 SV=1	3	3	5		27000000			27000000		13500000	6750000	0.5	-1	0.709843	0.148837	13500000	13500000	1	1	0	0	1	FALSE	TRUE	TRUE	32	411	7.78589	Tnon_mito	EF-1a|ERFS|HBS1|HSPC276|Q9Y450	ENSG00000112339
LTA4H	Leukotriene A-4 hydrolase OS=Homo sapiens GN=LTA4H PE=1 SV=2	11	11	18	52000000	75000000	34000000	28000000	22000000	20000000	63500000	26000000	0.409449	-1.28824	0.168527	0.773332	21000000	25000000	0.330709	0.393701	-1.59637	-1.34483	4	FALSE	TRUE	TRUE	14	411	3.40633	Tnon_mito	P09960	ENSG00000111144
FKBP4	Peptidyl-prolyl cis-trans isomerase FKBP4 OS=Homo sapiens GN=FKBP4 PE=1 SV=3	19	19	87	280000000	270000000	130000000	140000000	86000000	110000000	275000000	116500000	0.423636	-1.2391	0.000343163	3.4645	98000000	113000000	0.356364	0.410909	-1.48858	-1.28311	4	TRUE	TRUE	TRUE	95	411	23.1144	Tpossible_mito	FKBP51|FKBP52|FKBP59|HBI|Hsp56|PPIase|p52|Q02790	ENSG00000004478
BSG	Basigin OS=Homo sapiens GN=BSG PE=1 SV=2	2	2	7		24000000	49000000	52000000	43000000		12000000	36000000	3	1.58496	0.253464	0.596083	21500000	47500000	1.79167	3.95833	0.841302	1.98489	3	FALSE	FALSE	TRUE	40	411	9.73236	Tpossible_mito	5F7|CD147|EMMPRIN|M6|OK|TCSF|P35613	ENSG00000172270
KIF1B	Isoform 3 of Kinesin-like protein KIF1B OS=Homo sapiens GN=KIF1B	2	2	5	7000000	7900000	8100000			8100000	7450000	4050000	0.543624	-0.879319	0.242874	0.614618	4050000	0	0.543624	0	-0.879319		2	FALSE	FALSE	TRUE	18	411	4.37956	Tmito	CMT2|CMT2A|CMT2A1|HMSNII|KLP|NBLST1|O60333	ENSG00000054523
PTRHD1	Putative peptidyl-tRNA hydrolase PTRHD1 OS=Homo sapiens GN=PTRHD1 PE=1 SV=1	2	2	3	34000000	40000000					37000000	0	0		0.0515051	1.28815	0	0	0	0			0	FALSE	FALSE	FALSE	2	411	0.486618	Tnon_mito	C2orf79|Q6GMV3	ENSG00000184924
RFC1	Replication factor C subunit 1 OS=Homo sapiens GN=RFC1 PE=1 SV=4	7	7	17	25000000	28000000	22000000	25000000	19000000	21000000	26500000	21750000	0.820755	-0.284977	0.111289	0.953549	20000000	22000000	0.754717	0.830189	-0.405992	-0.268489	4	FALSE	TRUE	TRUE	50	411	12.1655	Tnon_mito	A1|MHCBFB|PO-GA|RECC1|RFC|RFC140|P35251	ENSG00000035928
OGT	UDP-N-acetylglucosamine--peptide N-acetylglucosaminyltransferase 110 kDa subunit OS=Homo sapiens GN=OGT PE=1 SV=3	6	6	14	30000000	27000000	20000000	17000000	16000000	14000000	28500000	16750000	0.587719	-0.766801	0.015606	1.80671	15000000	16500000	0.526316	0.578947	-0.925999	-0.788496	4	TRUE	TRUE	TRUE	55	411	13.382	Tpossible_mito	HRNT1|O-GLCNAC|O15294	ENSG00000147162
STK10	Serine/threonine-protein kinase 10 OS=Homo sapiens GN=STK10 PE=1 SV=1	1	1	2			11000000	11000000			0	5500000	100	6.64386	0.18169	0.740669	0	5500000	0	100		6.64386	2	FALSE	FALSE	FALSE	6	411	1.45985	Tnon_mito	LOK|PRO2729|O94804	ENSG00000072786
TJP2	Isoform 7 of Tight junction protein ZO-2 OS=Homo sapiens GN=TJP2	1	1	1				6700000			0	1675000	100	6.64386	0.391002	0.407821	0	3350000	0	100		6.64386	1	FALSE	FALSE	FALSE	32	411	7.78589	Tnon_mito	C9DUPq21.11|DFNA51|DUP9q21.11|X104|ZO2|Q9UDY2	ENSG00000119139
CEP170	Centrosomal protein of 170 kDa OS=Homo sapiens GN=CEP170 PE=1 SV=1	4	4	22	20000000	18000000	22000000	24000000	17000000	19000000	19000000	20500000	1.07895	0.109624	0.463018	0.334402	18000000	20500000	0.947368	1.07895	-0.0780025	0.109624	4	FALSE	TRUE	TRUE	46	411	11.1922	Tnon_mito	FAM68A|KAB|KIAA0470|Q5SW79	ENSG00000143702
UQCC2	Ubiquinol-cytochrome-c reductase complex assembly factor 2 OS=Homo sapiens GN=UQCC2 PE=1 SV=1	1	1	4		50000000	38000000	82000000	42000000		25000000	40500000	1.62	0.695994	0.658558	0.181406	21000000	62000000	0.84	2.48	-0.251539	1.31034	3	FALSE	FALSE	FALSE	0	411	0	Tmito	C6orf125|Cbp6|M19|MNF1|bA6B20.2|Q9BRT2	ENSG00000137288
PDE12	2',5'-phosphodiesterase 12 OS=Homo sapiens GN=PDE12 PE=1 SV=2	5	5	13	38000000	21000000	40000000	36000000	29000000	34000000	29500000	34750000	1.17797	0.236298	0.646909	0.189157	31500000	32500000	1.0678	1.10169	0.0946369	0.139725	4	FALSE	TRUE	TRUE	10	411	2.43309	Tmito	2'-PDE|Q6L8Q7	ENSG00000174840
TRABD	TraB domain-containing protein OS=Homo sapiens GN=TRABD PE=2 SV=1	1	1	5	25000000		24000000	30000000	24000000	25000000	12500000	25750000	2.06	1.04264	0.479952	0.318802	24500000	27000000	1.96	2.16	0.970854	1.11103	4	FALSE	FALSE	TRUE	4	411	0.973236	Tnon_mito	LP6054|PP2447|Q9H4I3	ENSG00000170638
NME3	Nucleoside diphosphate kinase 3 OS=Homo sapiens GN=NME3 PE=1 SV=2	1	1	1				19000000			0	4750000	100	6.64386	0.391002	0.407821	0	9500000	0	100		6.64386	1	FALSE	FALSE	FALSE	5	411	1.21655	Tmito	DR-nm23|NDPK-C|NDPKC|NM23-H3|NM23H3|c371H6.2|Q13232	ENSG00000103024
DHX30	Isoform 2 of Putative ATP-dependent RNA helicase DHX30 OS=Homo sapiens GN=DHX30	10	10	16	37000000	21000000	24000000	19000000	22000000		29000000	16250000	0.560345	-0.835613	0.31852	0.496863	11000000	20500000	0.37931	0.706897	-1.39855	-0.500429	3	FALSE	TRUE	TRUE	62	411	15.0852	Tmito	DDX30|RETCOR|Q7L2E3	ENSG00000132153
BZW2	Basic leucine zipper and W2 domain-containing protein 2 OS=Homo sapiens GN=BZW2 PE=1 SV=1	4	7	28	34000000	32000000	48000000	47000000	36000000	41000000	33000000	43000000	1.30303	0.381871	0.032593	1.48688	38500000	41500000	1.16667	1.25758	0.222392	0.330645	4	TRUE	TRUE	TRUE	15	411	3.64964	Tnon_mito	MST017|MSTP017|Q9Y6E2	ENSG00000136261
METTL15	Probable methyltransferase-like protein 15 OS=Homo sapiens GN=METTL15 PE=2 SV=1	1	1	3			5400000		8400000	7200000	0	5250000	100	6.64386	0.0662125	1.17906	7800000	4200000	100	100	6.64386	6.64386	3	FALSE	FALSE	FALSE	1	411	0.243309	Tmito	METT5D1|A6NJ78	ENSG00000169519
CDKN2A	Isoform 5 of Cyclin-dependent kinase inhibitor 2A, isoforms 1/2/3 OS=Homo sapiens GN=CDKN2A	1	1	2	25000000	25000000					25000000	0	0				0	0	0	0			0		FALSE	FALSE	25	411	6.08273	Tpossible_mito	ARF|CDK4I|CDKN2|CMM2|INK4|INK4A|MLM|MTS-1|MTS1|P14|P14ARF|P16|P16-INK4A|P16INK4|P16INK4A|P19|P19ARF|TP16|P42771	ENSG00000147889
NR0B2	Nuclear receptor subfamily 0 group B member 2 OS=Homo sapiens GN=NR0B2 PE=1 SV=2	1	1	1						200000000	0	50000000	100	6.64386	0.391002	0.407821	100000000	0	100	0	6.64386		1	FALSE	FALSE	FALSE	0	411	0	Tnon_mito	SHP|SHP1|Q15466	ENSG00000131910
UROD	Uroporphyrinogen decarboxylase OS=Homo sapiens GN=UROD PE=1 SV=2	3	3	4	26000000	24000000					25000000	0	0		0.0254512	1.59429	0	0	0	0			0	TRUE	TRUE	FALSE	5	411	1.21655	Tnon_mito	PCT|UPD|P06132	ENSG00000126088
GMPS	GMP synthase [glutamine-hydrolyzing] OS=Homo sapiens GN=GMPS PE=1 SV=1	1	1	4	13000000	15000000			4900000	6400000	14000000	2825000	0.201786	-2.3091	0.0045047	2.34633	5650000	2450000	0.403571	0.175	-1.3091	-2.51457	2	TRUE	FALSE	FALSE	58	411	14.1119	Tnon_mito	P49915	ENSG00000163655
FDFT1	Squalene synthase OS=Homo sapiens GN=FDFT1 PE=1 SV=1	9	9	43	71000000	54000000	91000000	110000000	78000000	84000000	62500000	90750000	1.452	0.538041	0.102074	0.991085	81000000	94000000	1.296	1.504	0.374066	0.588805	4	FALSE	TRUE	TRUE	9	411	2.18978	Tnon_mito	DGPT|ERG9|SQS|SS|P37268	ENSG00000079459
GART	Trifunctional purine biosynthetic protein adenosine-3 OS=Homo sapiens GN=GART PE=1 SV=1	15	15	60	130000000	120000000	31000000	69000000	31000000	35000000	125000000	41500000	0.332	-1.59074	0.00136185	2.86587	33000000	50000000	0.264	0.4	-1.92139	-1.32193	4	TRUE	TRUE	TRUE	104	411	25.3041	Tnon_mito	AIRS|GARS|GARTF|PAIS|PGFT|PRGS|P22102	ENSG00000159131
ANKFY1	Isoform 4 of Ankyrin repeat and FYVE domain-containing protein 1 OS=Homo sapiens GN=ANKFY1	6	6	12	35000000	26000000		20000000	15000000	29000000	30500000	16000000	0.52459	-0.930737	0.131548	0.880916	22000000	17500000	0.721311	0.57377	-0.471306	-0.801454	3	FALSE	TRUE	TRUE	60	411	14.5985	Tnon_mito	ANKHZN|BTBD23|ZFYVE14|Q9P2R3	ENSG00000185722
ANP32B	Acidic leucine-rich nuclear phosphoprotein 32 family member B OS=Homo sapiens GN=ANP32B PE=1 SV=1	2	3	29	87000000	61000000	65000000	59000000	20000000		74000000	36000000	0.486486	-1.03953	0.144332	0.840636	10000000	39500000	0.135135	0.533784	-2.88753	-0.905673	3	FALSE	TRUE	TRUE	30	411	7.29927	Tnon_mito	APRIL|PHAPI2|SSP29|Q92688	ENSG00000136938
EIF2B4	Translation initiation factor eIF-2B subunit delta OS=Homo sapiens GN=EIF2B4 PE=2 SV=1	4	4	6		18000000	19000000	14000000	13000000		9000000	11500000	1.27778	0.353637	0.831675	0.0800464	6500000	13500000	0.722222	1.5	-0.469485	0.584963	3	FALSE	TRUE	TRUE	22	411	5.3528	Tnon_mito	EIF-2B|EIF2B|EIF2Bdelta|Q9UI10	ENSG00000115211
NT5DC2	Isoform 2 of 5'-nucleotidase domain-containing protein 2 OS=Homo sapiens GN=NT5DC2	6	6	12	11000000	8300000	23000000	26000000	8500000		9650000	14375000	1.48964	0.574961	0.501942	0.299346	4250000	17250000	0.440415	1.78756	-1.18307	0.837996	3	FALSE	TRUE	TRUE	28	411	6.81265	Tmito	Q9H857	ENSG00000168268
MAP2K2	Dual specificity mitogen-activated protein kinase kinase 2 OS=Homo sapiens GN=MAP2K2 PE=1 SV=1	1	2	3		11000000					5500000	0	0		0.5	0.30103	0	0	0	0			0	FALSE	FALSE	FALSE	7	411	1.70316	Tpossible_mito	CFC4|MAPKK2|MEK2|MKK2|PRKMK2|P36507	ENSG00000126934
DNAJA2	DnaJ homolog subfamily A member 2 OS=Homo sapiens GN=DNAJA2 PE=1 SV=1	7	7	43	100000000	96000000	80000000	53000000	66000000	59000000	98000000	64500000	0.658163	-0.603483	0.00740498	2.13048	62500000	59500000	0.637755	0.607143	-0.648926	-0.719892	4	TRUE	TRUE	TRUE	90	411	21.8978	Tnon_mito	CPR3|DJ3|DJA2|DNAJ|DNJ3|HIRIP4|PRO3015|RDJ2|O60884	ENSG00000069345
CAD	CAD protein OS=Homo sapiens GN=CAD PE=1 SV=3	21	21	64	110000000	100000000	32000000	41000000	46000000	39000000	105000000	39500000	0.37619	-1.41046	0.0128245	1.89196	42500000	43500000	0.404762	0.414286	-1.30485	-1.2713	4	TRUE	TRUE	TRUE	147	411	35.7664	Tnon_mito	P27708	ENSG00000084774
TOP2A	Isoform 4 of DNA topoisomerase 2-alpha OS=Homo sapiens GN=TOP2A	1	1	1						5800000	0	1450000	100	6.64386	0.391002	0.407821	2900000	0	100	0	6.64386		1	FALSE	FALSE	FALSE	69	411	16.7883	Tnon_mito	TOP2|TP2A|P11388	ENSG00000131747
VARS	Valine--tRNA ligase OS=Homo sapiens GN=VARS PE=1 SV=4	14	14	64	110000000	78000000	86000000	92000000	66000000	91000000	94000000	83750000	0.890957	-0.166572	0.636625	0.196116	78500000	79000000	0.835106	0.840426	-0.259968	-0.250808	4	FALSE	TRUE	TRUE	100	411	24.3309	Tpossible_mito	G7A|VARS1|VARS2|P26640	ENSG00000096171
DDX46	Probable ATP-dependent RNA helicase DDX46 OS=Homo sapiens GN=DDX46 PE=1 SV=2	14	14	39	33000000	33000000	60000000	76000000	42000000	46000000	33000000	56000000	1.69697	0.762961	0.0583203	1.23418	44000000	59000000	1.33333	1.78788	0.415037	0.838249	4	FALSE	TRUE	TRUE	125	411	30.4136	Tnon_mito	PRPF5|Prp5|Q7L014	ENSG00000145833
DDX41	Probable ATP-dependent RNA helicase DDX41 (Fragment) OS=Homo sapiens GN=DDX41 PE=2 SV=1	2	2	3				19000000		18000000	0	9250000	100	6.64386	0.181923	0.740113	9000000	9500000	100	100	6.64386	6.64386	2	FALSE	FALSE	FALSE	60	411	14.5985	Tnon_mito	ABS|Q9UJV9	ENSG00000183258
PSMA7	Proteasome subunit alpha type-7 OS=Homo sapiens GN=PSMA7 PE=1 SV=1	10	10	72	360000000	290000000	150000000	210000000	160000000	140000000	325000000	165000000	0.507692	-0.977974	0.0923183	1.03471	150000000	185000000	0.461538	0.569231	-1.11548	-0.812914	4	FALSE	TRUE	TRUE	89	411	21.6545	Tnon_mito	C6|HSPC|RC6-1|XAPC7|O14818	ENSG00000101182
PPIH	Peptidyl-prolyl cis-trans isomerase H OS=Homo sapiens GN=PPIH PE=1 SV=1	3	3	15	75000000	45000000	51000000	45000000	30000000	54000000	60000000	45000000	0.75	-0.415037	0.491124	0.308809	42000000	37500000	0.7	0.625	-0.514573	-0.678072	4	FALSE	TRUE	TRUE	15	411	3.64964	Tnon_mito	CYP-20|CYPH|SnuCyp-20|USA-CYP|O43447	ENSG00000171960
AASDHPPT	L-aminoadipate-semialdehyde dehydrogenase-phosphopantetheinyl transferase OS=Homo sapiens GN=AASDHPPT PE=1 SV=2	1	1	1		15000000					7500000	0	0		0.5	0.30103	0	0	0	0			0	FALSE	FALSE	FALSE	7	411	1.70316	Tnon_mito	AASD-PPT|LYS2|LYS5|Q9NRN7	ENSG00000149313
ALDH16A1	Aldehyde dehydrogenase family 16 member A1 OS=Homo sapiens GN=ALDH16A1 PE=1 SV=2	1	1	2	5400000	8500000					6950000	0	0		0.139694	0.854823	0	0	0	0			0	FALSE	FALSE	FALSE	12	411	2.91971	Tnon_mito	Q8IZ83	ENSG00000161618
PRKACA	cAMP-dependent protein kinase catalytic subunit alpha OS=Homo sapiens GN=PRKACA PE=1 SV=2	3	3	15	43000000	41000000	22000000	40000000	31000000	29000000	42000000	30500000	0.72619	-0.46158	0.049439	1.30593	30000000	35500000	0.714286	0.845238	-0.485427	-0.24257	4	TRUE	TRUE	TRUE	11	411	2.6764	Tpossible_mito	PKACA|P17612	ENSG00000072062
SUPT5H	Transcription elongation factor SPT5 OS=Homo sapiens GN=SUPT5H PE=1 SV=1	1	1	2	21000000	19000000					20000000	0	0		0.0318045	1.49751	0	0	0	0			0	TRUE	FALSE	FALSE	50	411	12.1655	Tnon_mito	SPT5|SPT5H|Tat-CT1|O00267	ENSG00000196235
CA2	Carbonic anhydrase 2 OS=Homo sapiens GN=CA2 PE=1 SV=2	1	1	1		15000000					7500000	0	0		0.5	0.30103	0	0	0	0			0	FALSE	FALSE	FALSE	12	411	2.91971	Tnon_mito	CA-II|CAC|CAII|Car2|HEL-76|P00918	ENSG00000104267
CKB	Creatine kinase B-type OS=Homo sapiens GN=CKB PE=1 SV=1	14	14	171	1100000000	1300000000	400000000	560000000	440000000	390000000	1200000000	447500000	0.372917	-1.42307	0.0530073	1.27566	415000000	500000000	0.345833	0.416667	-1.53185	-1.26303	4	FALSE	TRUE	TRUE	163	411	39.6594	Tpossible_mito	B-CK|BCK|CKBB|HEL-211|HEL-S-29|P12277	ENSG00000166165
DHX29	ATP-dependent RNA helicase DHX29 OS=Homo sapiens GN=DHX29 PE=1 SV=2	2	2	10	9400000	13000000	13000000	11000000	12000000	20000000	11200000	14000000	1.25	0.321928	0.371676	0.429835	16000000	11500000	1.42857	1.02679	0.514573	0.0381351	4	FALSE	FALSE	TRUE	36	411	8.75912	Tpossible_mito	DDX29|Q7Z478	ENSG00000067248
FEN1	Flap endonuclease 1 OS=Homo sapiens GN=FEN1 PE=1 SV=1	5	5	41	160000000	140000000	170000000	150000000	100000000	120000000	150000000	135000000	0.9	-0.152003	0.463018	0.334402	110000000	125000000	0.733333	0.833333	-0.447459	-0.263034	4	FALSE	TRUE	TRUE	98	411	23.8443	Tpossible_mito	FEN-1|MF1|RAD2|P39748	ENSG00000168496
KDSR	3-ketodihydrosphingosine reductase OS=Homo sapiens GN=KDSR PE=1 SV=1	1	1	3			31000000	33000000		33000000	0	24250000	100	6.64386	0.0579033	1.2373	16500000	16500000	100	100	6.64386	6.64386	3	FALSE	FALSE	FALSE	1	411	0.243309	Tnon_mito	DHSR|FVT1|SDR35C1|Q06136	ENSG00000119537
DHFR	Dihydrofolate reductase OS=Homo sapiens GN=DHFR PE=1 SV=2	2	2	3	51000000	29000000					40000000	0	0		0.170847	0.767392	0	0	0	0			0	FALSE	FALSE	FALSE	12	411	2.91971	Tnon_mito	DHFRP1|DYR|P00374	ENSG00000228716
ATP6V1A	V-type proton ATPase catalytic subunit A OS=Homo sapiens GN=ATP6V1A PE=1 SV=2	6	6	11	51000000	28000000		47000000	59000000	42000000	39500000	37000000	0.936709	-0.0943274	0.893031	0.0491336	50500000	53000000	1.27848	1.34177	0.354431	0.42414	3	FALSE	TRUE	TRUE	62	411	15.0852	Tpossible_mito	ATP6A1|ATP6V1A1|HO68|VA68|VPP2|Vma1|P38606	ENSG00000114573
ATP6V1B2	V-type proton ATPase subunit B, brain isoform OS=Homo sapiens GN=ATP6V1B2 PE=1 SV=3	4	4	18	82000000	49000000	41000000	41000000	36000000	44000000	65500000	40500000	0.618321	-0.693573	0.369373	0.432534	40000000	38500000	0.610687	0.587786	-0.711495	-0.766636	4	FALSE	TRUE	TRUE	40	411	9.73236	Tnon_mito	ATP6B1B2|ATP6B2|HO57|VATB|VPP3|Vma2|P21281	ENSG00000147416
EEF2	Elongation factor 2 OS=Homo sapiens GN=EEF2 PE=1 SV=4	41	42	460	1100000000	920000000	550000000	750000000	460000000	510000000	1010000000	567500000	0.561881	-0.831663	0.0534198	1.2723	485000000	605000000	0.480198	0.59901	-1.0583	-0.739348	4	FALSE	TRUE	TRUE	207	411	50.365	Tnon_mito	EEF-2|EF-2|EF2|SCA26|P13639	ENSG00000167658
RPS5	40S ribosomal protein S5 OS=Homo sapiens GN=RPS5 PE=1 SV=4	10	10	125	770000000	720000000	650000000	890000000	460000000	490000000	745000000	622500000	0.83557	-0.259167	0.305813	0.514544	475000000	675000000	0.637584	0.90604	-0.649313	-0.142353	4	FALSE	TRUE	TRUE	160	411	38.9294	Tnon_mito	S5|P46782	ENSG00000083845
GTF3C1	General transcription factor 3C polypeptide 1 OS=Homo sapiens GN=GTF3C1 PE=1 SV=4	3	3	11	21000000	18000000	17000000	14000000	11000000	11000000	19500000	13250000	0.679487	-0.557482	0.0605579	1.21783	11000000	12500000	0.564103	0.641026	-0.825971	-0.641546	4	FALSE	TRUE	TRUE	39	411	9.48905	Tnon_mito	TFIIIC|TFIIIC220|TFIIICalpha|Q12789	ENSG00000077235
B2M	Beta-2-microglobulin form pI 5.3 OS=Homo sapiens GN=B2M PE=4 SV=1	1	1	2					58000000	49000000	0	26750000	100	6.64386	0.183934	0.735338	53500000	29000000	100	100	6.64386	6.64386	2	FALSE	FALSE	FALSE	5	411	1.21655	Tnon_mito	P61769	ENSG00000166710
HEXA	Beta-hexosaminidase OS=Homo sapiens GN=HEXA PE=2 SV=1	9	10	27	44000000	33000000	39000000	38000000	32000000	47000000	38500000	39000000	1.01299	0.0186157	0.945234	0.0244606	39500000	35000000	1.02597	0.909091	0.0369942	-0.137504	4	FALSE	TRUE	TRUE	0	411	0	Tnon_mito	TSD|P06865	ENSG00000213614
ALDH1A2	Retinal dehydrogenase 2 OS=Homo sapiens GN=ALDH1A2 PE=1 SV=3	1	2	7		11000000	14000000	13000000	11000000	14000000	5500000	13000000	2.36364	1.24101	0.399972	0.397971	12500000	12000000	2.27273	2.18182	1.18442	1.12553	4	FALSE	FALSE	TRUE	30	411	7.29927	Tnon_mito	RALDH(II)|RALDH2|RALDH2-T|O94788	ENSG00000128918
AIP	AH receptor-interacting protein OS=Homo sapiens GN=AIP PE=1 SV=2	3	3	7	33000000	27000000		40000000	19000000		30000000	14750000	0.491667	-1.02425	0.211192	0.675323	9500000	29500000	0.316667	0.983333	-1.65896	-0.0242475	2	FALSE	TRUE	TRUE	16	411	3.89294	Tnon_mito	ARA9|FKBP16|FKBP37|SMTPHN|XAP-2|XAP2|O00170	ENSG00000110711
FKBP3	Peptidyl-prolyl cis-trans isomerase FKBP3 OS=Homo sapiens GN=FKBP3 PE=1 SV=1	8	8	51	180000000	130000000	140000000	160000000	120000000	150000000	155000000	142500000	0.919355	-0.121306	0.705824	0.151304	135000000	140000000	0.870968	0.903226	-0.199309	-0.146841	4	FALSE	TRUE	TRUE	44	411	10.7056	Tnon_mito	FKBP-25|FKBP-3|FKBP25|PPIase|Q00688	ENSG00000100442
ADH5	Alcohol dehydrogenase class-3 OS=Homo sapiens GN=ADH5 PE=1 SV=4	4	4	10	45000000	53000000	50000000	69000000	43000000	37000000	49000000	49750000	1.01531	0.0219148	0.929941	0.0315447	40000000	56000000	0.816327	1.14286	-0.292782	0.192645	4	FALSE	TRUE	TRUE	9	411	2.18978	Tpossible_mito	ADH-3|ADHX|FALDH|FDH|GSH-FDH|GSNOR|P11766	ENSG00000197894
CYFIP1	Cytoplasmic FMR1-interacting protein 1 OS=Homo sapiens GN=CYFIP1 PE=1 SV=1	3	6	22	17000000	20000000	18000000	21000000	15000000	19000000	18500000	18250000	0.986486	-0.0196288	0.907796	0.0420116	17000000	18000000	0.918919	0.972973	-0.121991	-0.0395284	4	FALSE	TRUE	TRUE	46	411	11.1922	Tnon_mito	P140SRA-1|SHYC|SRA-1|SRA1|Q7L576	ENSG00000068793
SND1	Staphylococcal nuclease domain-containing protein 1 OS=Homo sapiens GN=SND1 PE=1 SV=1	32	32	216	170000000	190000000	150000000	180000000	150000000	150000000	180000000	157500000	0.875	-0.192645	0.201614	0.69548	150000000	165000000	0.833333	0.916667	-0.263034	-0.125531	4	FALSE	TRUE	TRUE	118	411	28.7105	Tmito	TDRD11|p100|Q7KZF4	ENSG00000197157
PYCRL	Pyrroline-5-carboxylate reductase 3 OS=Homo sapiens GN=PYCRL PE=1 SV=2	3	3	6	41000000	46000000			34000000	23000000	43500000	14250000	0.327586	-1.61005	0.0373635	1.42755	28500000	17000000	0.655172	0.390805	-0.610053	-1.35548	2	TRUE	TRUE	TRUE	7	411	1.70316	Tnon_mito	Q53H96	ENSG00000104524
DRG2	Developmentally-regulated GTP-binding protein 2 OS=Homo sapiens GN=DRG2 PE=1 SV=1	1	1	1		18000000					9000000	0	0		0.5	0.30103	0	0	0	0			0	FALSE	FALSE	FALSE	6	411	1.45985	Tpossible_mito	P55039	ENSG00000108591
GTPBP4	Nucleolar GTP-binding protein 1 OS=Homo sapiens GN=GTPBP4 PE=1 SV=3	3	3	10	46000000	55000000	51000000	59000000	38000000	40000000	50500000	47000000	0.930693	-0.103623	0.63309	0.198535	39000000	48500000	0.772277	0.960396	-0.372809	-0.0582986	4	FALSE	TRUE	TRUE	56	411	13.6253	Tnon_mito	CRFG|NGB|NOG1|Q9BZE4	ENSG00000107937
SAR1B	GTP-binding protein SAR1b OS=Homo sapiens GN=SAR1B PE=1 SV=1	1	2	6		32000000		21000000		29000000	16000000	12500000	0.78125	-0.356144	0.866813	0.0620748	14500000	10500000	0.90625	0.65625	-0.142019	-0.607683	2	FALSE	FALSE	TRUE	15	411	3.64964	Tnon_mito	ANDD|CMRD|GTBPB|SARA2|Q9Y6B6	ENSG00000152700
ARF4	ADP-ribosylation factor 4 OS=Homo sapiens GN=ARF4 PE=1 SV=3	3	7	48	66000000	65000000		72000000	60000000	50000000	65500000	45500000	0.694656	-0.525628	0.295464	0.529495	55000000	66000000	0.839695	1.00763	-0.252063	0.0109711	3	FALSE	TRUE	TRUE	67	411	16.3017	Tnon_mito	ARF2|P18085	ENSG00000168374
SAMHD1	Deoxynucleoside triphosphate triphosphohydrolase SAMHD1 OS=Homo sapiens GN=SAMHD1 PE=1 SV=2	1	1	6	25000000	22000000	18000000	19000000	13000000	15000000	23500000	16250000	0.691489	-0.532221	0.0435466	1.36105	14000000	16000000	0.595745	0.680851	-0.747234	-0.554589	4	TRUE	FALSE	TRUE	18	411	4.37956	Tnon_mito	CHBL2|DCIP|HDDC1|MOP-5|SBBI88|Q9Y3Z3	ENSG00000101347
FAHD2B	Fumarylacetoacetate hydrolase domain-containing protein 2B OS=Homo sapiens GN=FAHD2B PE=2 SV=1	2	2	4		43000000	27000000	28000000			21500000	13750000	0.639535	-0.644905	0.782211	0.106676	0	14000000	0	0.651163		-0.61891	2	FALSE	FALSE	FALSE	1	411	0.243309	Tpossible_mito	Q6P2I3	ENSG00000144199
PDCD6	Programmed cell death protein 6 OS=Homo sapiens GN=PDCD6 PE=1 SV=1	2	2	2	35000000						17500000	0	0		0.5	0.30103	0	0	0	0			0	FALSE	FALSE	FALSE	27	411	6.56934	Tnon_mito	ALG-2|PEF1B|O75340	ENSG00000249915
WDR61	WD repeat-containing protein 61 OS=Homo sapiens GN=WDR61 PE=1 SV=1	7	7	37	110000000	75000000	55000000	74000000	65000000	69000000	92500000	65750000	0.710811	-0.492462	0.35901	0.444894	67000000	69500000	0.724324	0.751351	-0.465292	-0.41244	4	FALSE	TRUE	TRUE	48	411	11.6788	Tnon_mito	REC14|SKI8|Q9GZS3	ENSG00000140395
NPEPPS	Puromycin-sensitive aminopeptidase OS=Homo sapiens GN=NPEPPS PE=1 SV=2	15	15	42	88000000	85000000	38000000	36000000	32000000	25000000	86500000	32750000	0.378613	-1.40121	8.06892e-05	4.09318	28500000	34000000	0.32948	0.393064	-1.60174	-1.34717	4	TRUE	TRUE	TRUE	34	411	8.27251	Tnon_mito	AAP-S|MP100|PSA|P55786	ENSG00000141279
RPL13A	60S ribosomal protein L13a (Fragment) OS=Homo sapiens GN=RPL13A PE=4 SV=2	4	4	100	660000000	450000000	400000000	510000000	440000000	470000000	555000000	455000000	0.81982	-0.286621	0.511552	0.29111	455000000	475000000	0.81982	0.855856	-0.286621	-0.22456	4	FALSE	TRUE	TRUE	144	411	35.0365	Tnon_mito	L13A|TSTA1|P40429	ENSG00000142541
TMCO1	Transmembrane and coiled-coil domain-containing protein 1 OS=Homo sapiens GN=TMCO1 PE=4 SV=1	1	1	1		36000000					18000000	0	0		0.5	0.30103	0	0	0	0			0	FALSE	FALSE	FALSE	13	411	3.16302	Tnon_mito	HP10122|PCIA3|PNAS-136|RP11-466F5.7|TMCC4|Q9UM00	ENSG00000143183
TUBA1C	Tubulin alpha-1C chain OS=Homo sapiens GN=TUBA1C PE=2 SV=1	3	22	319	160000000	84000000	59000000	100000000	110000000	47000000	122000000	79000000	0.647541	-0.626957	0.446875	0.349814	78500000	105000000	0.643443	0.860656	-0.636117	-0.216492	4	FALSE	TRUE	TRUE	389	411	94.6472	Tnon_mito	TUBA6|bcm948|Q9BQE3	ENSG00000167553
ACP2	Lysosomal acid phosphatase OS=Homo sapiens GN=ACP2 PE=1 SV=3	1	1	1					21000000		0	5250000	100	6.64386	0.391002	0.407821	10500000	10500000	100	100	6.64386	6.64386	1	FALSE	FALSE	FALSE	1	411	0.243309	Tnon_mito	P11117	ENSG00000134575
EFTUD2	116 kDa U5 small nuclear ribonucleoprotein component OS=Homo sapiens GN=EFTUD2 PE=1 SV=1	15	16	51	86000000	63000000	31000000	28000000	32000000	26000000	74500000	29250000	0.392617	-1.3488	0.154077	0.812263	29000000	30000000	0.389262	0.402685	-1.36119	-1.31228	4	FALSE	TRUE	TRUE	162	411	39.4161	Tnon_mito	MFDGA|MFDM|SNRNP116|Snrp116|Snu114|U5-116KD|Q15029	ENSG00000108883
ERLIN1	Erlin-1 OS=Homo sapiens GN=ERLIN1 PE=1 SV=1	1	3	18	20000000	19000000	21000000	25000000	20000000	23000000	19500000	22250000	1.14103	0.190331	0.0889102	1.05105	21500000	22500000	1.10256	1.15385	0.140863	0.206451	4	FALSE	TRUE	TRUE	29	411	7.05596	Tnon_mito	C10orf69|Erlin-1|KE04|KEO4|SPFH1|O75477	ENSG00000107566
LAMTOR2	Ragulator complex protein LAMTOR2 OS=Homo sapiens GN=LAMTOR2 PE=1 SV=1	2	2	2		21000000				7800000	10500000	1950000	0.185714	-2.42884	0.56302	0.249476	3900000	0	0.371429	0	-1.42884		1	FALSE	FALSE	FALSE	0	411	0	Tnon_mito	ENDAP|HSPC003|MAPBPIP|MAPKSP1AP|ROBLD3|Ragulator2|p14|Q9Y2Q5	ENSG00000116586
PIK3R4	Phosphoinositide 3-kinase regulatory subunit 4 OS=Homo sapiens GN=PIK3R4 PE=1 SV=3	2	2	4	6600000	6900000	7000000	11000000			6750000	4500000	0.666667	-0.584963	0.469552	0.328316	0	5500000	0	0.814815		-0.295456	2	FALSE	FALSE	FALSE	2	411	0.486618	Tnon_mito	VPS15|p150|Q99570	ENSG00000196455
CDS2	Phosphatidate cytidylyltransferase 2 OS=Homo sapiens GN=CDS2 PE=1 SV=1	2	2	5			16000000	19000000	20000000	24000000	0	19750000	100	6.64386	0.00125887	2.90002	22000000	19500000	100	100	6.64386	6.64386	4	TRUE	FALSE	TRUE	1	411	0.243309	Tpossible_mito	O95674	ENSG00000101290
PRDX4	Peroxiredoxin-4 OS=Homo sapiens GN=PRDX4 PE=1 SV=1	10	11	109	300000000	450000000	310000000	340000000	220000000	250000000	375000000	280000000	0.746667	-0.421464	0.409871	0.387352	235000000	280000000	0.626667	0.746667	-0.67423	-0.421464	4	FALSE	TRUE	TRUE	161	411	39.1727	Tmito	AOE37-2|HEL-S-97n|PRX-4|Q13162	ENSG00000123131
CCT7	T-complex protein 1 subunit eta OS=Homo sapiens GN=CCT7 PE=1 SV=2	21	21	210	410000000	370000000	250000000	310000000	230000000	220000000	390000000	252500000	0.647436	-0.627191	0.0165029	1.78244	225000000	270000000	0.576923	0.692308	-0.793549	-0.530515	4	TRUE	TRUE	TRUE	172	411	41.8491	Tmito	CCTETA|CCTH|NIP7-1|TCP1ETA|Q99832	ENSG00000135624
CCT4	T-complex protein 1 subunit delta OS=Homo sapiens GN=CCT4 PE=1 SV=4	24	25	229	660000000	600000000	390000000	600000000	330000000	390000000	630000000	427500000	0.678571	-0.559427	0.0385621	1.41384	360000000	465000000	0.571429	0.738095	-0.807355	-0.438121	4	TRUE	TRUE	TRUE	186	411	45.2555	Tnon_mito	CCT-DELTA|Cctd|SRB|P50991	ENSG00000115484
HSPH1	Heat shock protein 105 kDa OS=Homo sapiens GN=HSPH1 PE=1 SV=1	20	22	157	210000000	190000000	110000000	140000000	90000000	100000000	200000000	110000000	0.55	-0.862496	0.00707692	2.15016	95000000	115000000	0.475	0.575	-1.074	-0.798366	4	TRUE	TRUE	TRUE	119	411	28.9538	Tnon_mito	HSP105|HSP105A|HSP105B|NY-CO-25|Q92598	ENSG00000120694
CCT5	T-complex protein 1 subunit epsilon OS=Homo sapiens GN=CCT5 PE=1 SV=1	25	26	214	470000000	480000000	370000000	550000000	420000000	360000000	475000000	425000000	0.894737	-0.160465	0.336204	0.473397	390000000	485000000	0.821053	1.02105	-0.284453	0.0300572	4	FALSE	TRUE	TRUE	182	411	44.2822	Tnon_mito	CCT-epsilon|CCTE|HEL-S-69|TCP-1-epsilon|P48643	ENSG00000150753
TXNDC5	Thioredoxin domain-containing protein 5 OS=Homo sapiens GN=TXNDC5 PE=1 SV=2	11	11	93	390000000	360000000	360000000	420000000	250000000	240000000	375000000	317500000	0.846667	-0.240134	0.28786	0.540819	245000000	335000000	0.653333	0.893333	-0.614109	-0.16273	4	FALSE	TRUE	TRUE	30	411	7.29927	Tnon_mito	ENDOPDI|ERP46|HCC-2|PDIA15|STRF8|UNQ364|Q8NBS9	ENSG00000239264
STRAP	Serine-threonine kinase receptor-associated protein OS=Homo sapiens GN=STRAP PE=2 SV=1	13	13	79	150000000	150000000	130000000	180000000	120000000	130000000	150000000	140000000	0.933333	-0.0995357	0.513713	0.28928	125000000	150000000	0.833333	1	-0.263034	0	4	FALSE	TRUE	TRUE	93	411	22.6277	Tpossible_mito	MAWD|PT-WD|UNRIP|Q9Y3F4	ENSG00000023734
P4HB	Protein disulfide-isomerase OS=Homo sapiens GN=P4HB PE=1 SV=3	22	22	237	610000000	410000000	510000000	590000000	490000000	480000000	510000000	517500000	1.01471	0.0210616	0.952714	0.0210373	485000000	540000000	0.95098	1.05882	-0.0725125	0.0824622	4	FALSE	TRUE	TRUE	115	411	27.9805	Tmito	DSI|ERBA2L|GIT|P4Hbeta|PDI|PDIA1|PHDB|PO4DB|PO4HB|PROHB|P07237	ENSG00000185624
PRDX1	Peroxiredoxin-1 OS=Homo sapiens GN=PRDX1 PE=1 SV=1	10	12	154	2400000000	1600000000	820000000	1100000000	860000000	1000000000	2000000000	945000000	0.4725	-1.08161	0.2233	0.651111	930000000	980000000	0.465	0.49	-1.1047	-1.02915	4	FALSE	TRUE	TRUE	253	411	61.5572	Tpossible_mito	MSP23|NKEF-A|NKEFA|PAG|PAGA|PAGB|PRX1|PRXI|TDPX2|Q06830	ENSG00000117450
RPS16	40S ribosomal protein S16 OS=Homo sapiens GN=RPS16 PE=1 SV=2	6	6	75	910000000	750000000	730000000	960000000	710000000	830000000	830000000	807500000	0.972892	-0.0396491	0.839397	0.0760324	770000000	835000000	0.927711	1.00602	-0.108253	0.00866486	4	FALSE	TRUE	TRUE	211	411	51.3382	Tnon_mito	S16|P62249	ENSG00000105193
DNAJC7	DnaJ homolog subfamily C member 7 OS=Homo sapiens GN=DNAJC7 PE=1 SV=2	14	14	38	88000000	69000000	39000000	36000000	34000000	44000000	78500000	38250000	0.487261	-1.03723	0.132609	0.877425	39000000	35000000	0.496815	0.44586	-1.00922	-1.16534	4	FALSE	TRUE	TRUE	59	411	14.3552	Tnon_mito	DJ11|DJC7|TPR2|TTC2|Q99615	ENSG00000168259
STK25	Serine/threonine-protein kinase 25 (Fragment) OS=Homo sapiens GN=STK25 PE=4 SV=1	2	2	2	33000000			69000000			16500000	17250000	1.04545	0.0641303	0.97683	0.0101808	0	34500000	0	2.09091		1.06413	1	FALSE	FALSE	FALSE	17	411	4.13625	Tnon_mito	SOK1|YSK1|O00506	ENSG00000115694
GMPPB	Isoform 2 of Mannose-1-phosphate guanyltransferase beta OS=Homo sapiens GN=GMPPB	1	1	1		21000000					10500000	0	0		0.5	0.30103	0	0	0	0			0	FALSE	FALSE	FALSE	3	411	0.729927	Tpossible_mito	MDDGA14|MDDGB14|MDDGC14|Q9Y5P6	ENSG00000173540
AARS	Alanine--tRNA ligase, cytoplasmic OS=Homo sapiens GN=AARS PE=1 SV=2	9	9	19	57000000	41000000	19000000	18000000	16000000	12000000	49000000	16250000	0.331633	-1.59234	0.141559	0.849062	14000000	17000000	0.285714	0.346939	-1.80735	-1.52725	4	FALSE	TRUE	TRUE	52	411	12.6521	Tnon_mito	CMT2N|P49588	ENSG00000090861
CBR1	Carbonyl reductase [NADPH] 1 OS=Homo sapiens GN=CBR1 PE=1 SV=3	9	9	22	100000000	77000000	30000000	44000000	39000000		88500000	28250000	0.319209	-1.64743	0.0381526	1.41848	19500000	41500000	0.220339	0.468927	-2.1822	-1.09257	3	TRUE	TRUE	TRUE	49	411	11.9221	Tnon_mito	CBR|SDR21C1|hCBR1|P16152	ENSG00000159228
PDIA3	Protein disulfide-isomerase A3 OS=Homo sapiens GN=PDIA3 PE=1 SV=4	23	28	336	850000000	1100000000	1000000000	1700000000	790000000	630000000	975000000	1030000000	1.05641	0.0791702	0.846854	0.0721913	710000000	1245000000	0.728205	1.27692	-0.457583	0.352672	4	FALSE	TRUE	TRUE	104	411	25.3041	Tnon_mito	ER60|ERp57|ERp60|ERp61|GRP57|GRP58|HEL-S-269|HEL-S-93n|HsT17083|P58|PI-PLC|P30101	ENSG00000167004
PDIA3	Thioredoxin (Fragment) OS=Homo sapiens GN=PDIA3 PE=2 SV=1	1	6	87	620000000	600000000	520000000	730000000	550000000	480000000	610000000	570000000	0.934426	-0.0978473	0.524646	0.280134	515000000	640000000	0.844262	1.04918	-0.244237	0.0692627	4	FALSE	TRUE	TRUE	104	411	25.3041	Tnon_mito	ER60|ERp57|ERp60|ERp61|GRP57|GRP58|HEL-S-269|HEL-S-93n|HsT17083|P58|PI-PLC|P30101	ENSG00000167004
HSPA4	Heat shock 70 kDa protein 4 OS=Homo sapiens GN=HSPA4 PE=1 SV=4	28	30	270	360000000	370000000	250000000	290000000	160000000	180000000	365000000	220000000	0.60274	-0.730393	0.0159763	1.79652	170000000	225000000	0.465753	0.616438	-1.10236	-0.697971	4	TRUE	TRUE	TRUE	133	411	32.3601	Tpossible_mito	APG-2|HEL-S-5a|HS24/P52|HSPH2|RY|hsp70|hsp70RY|P34932	ENSG00000170606
HSPA5	78 kDa glucose-regulated protein OS=Homo sapiens GN=HSPA5 PE=1 SV=2	28	30	681	2100000000	1300000000	1300000000	1600000000	1200000000	1400000000	1700000000	1375000000	0.808824	-0.306103	0.563226	0.249317	1300000000	1400000000	0.764706	0.823529	-0.387023	-0.280108	4	FALSE	TRUE	TRUE	360	411	87.5912	Tpossible_mito	BIP|GRP78|HEL-S-89n|MIF2|P11021	ENSG00000044574
HSPA8	Heat shock cognate 71 kDa protein OS=Homo sapiens GN=HSPA8 PE=1 SV=1	15	28	462	1400000000	1000000000	850000000	1000000000	690000000	890000000	1200000000	857500000	0.714583	-0.484826	0.31682	0.499188	790000000	845000000	0.658333	0.704167	-0.60311	-0.506011	4	FALSE	TRUE	TRUE	396	411	96.3504	Tnon_mito	HEL-33|HEL-S-72p|HSC54|HSC70|HSC71|HSP71|HSP73|HSPA10|LAP1|NIP71|P11142	ENSG00000109971
HSPA8	Heat shock cognate 71 kDa protein (Fragment) OS=Homo sapiens GN=HSPA8 PE=2 SV=2	1	12	242	1400000000	530000000	590000000	220000000	150000000	160000000	965000000	280000000	0.290155	-1.7851	0.349245	0.45687	155000000	185000000	0.160622	0.19171	-2.63826	-2.383	4	FALSE	TRUE	TRUE	396	411	96.3504	Tnon_mito	HEL-33|HEL-S-72p|HSC54|HSC70|HSC71|HSP71|HSP73|HSPA10|LAP1|NIP71|P11142	ENSG00000109971
HSP90AA1	Heat shock protein HSP 90-alpha OS=Homo sapiens GN=HSP90AA1 PE=1 SV=5	23	39	693	2400000000	2900000000	1200000000	1900000000	880000000	960000000	2650000000	1235000000	0.466038	-1.10148	0.0295261	1.52979	920000000	1390000000	0.34717	0.524528	-1.52629	-0.930907	4	TRUE	TRUE	TRUE	272	411	66.18	Tpossible_mito	EL52|HSP86|HSP89A|HSP90A|HSP90N|HSPC1|HSPCA|HSPCAL1|HSPCAL4|HSPN|Hsp89|Hsp90|LAP2|P07900	ENSG00000080824
HSP90AB1	Heat shock protein HSP 90-beta OS=Homo sapiens GN=HSP90AB1 PE=1 SV=4	20	37	729	2400000000	1800000000	1200000000	1200000000	840000000	1000000000	2100000000	1060000000	0.504762	-0.986325	0.155643	0.80787	920000000	1020000000	0.438095	0.485714	-1.19068	-1.04182	4	FALSE	TRUE	TRUE	277	411	67.3966	Tpossible_mito	D6S182|HSP84|HSP90B|HSPC2|HSPCB|P08238	ENSG00000096384
LDHA	Isoform 3 of L-lactate dehydrogenase A chain OS=Homo sapiens GN=LDHA	12	13	122	580000000	520000000	220000000	270000000	140000000	170000000	550000000	200000000	0.363636	-1.45943	0.00418998	2.37779	155000000	205000000	0.281818	0.372727	-1.82716	-1.42381	4	TRUE	TRUE	TRUE	140	411	34.0633	Tpossible_mito	GSD11|HEL-S-133P|LDH1|LDHM|P00338	ENSG00000134333
RPS11	40S ribosomal protein S11 OS=Homo sapiens GN=RPS11 PE=1 SV=3	9	9	104	550000000	760000000	410000000	800000000	920000000	510000000	655000000	660000000	1.00763	0.0109711	0.976721	0.0102296	715000000	860000000	1.0916	1.31298	0.126448	0.392842	4	FALSE	TRUE	TRUE	151	411	36.7397	Tnon_mito	S11|P62280	ENSG00000142534
RPS23	40S ribosomal protein S23 OS=Homo sapiens GN=RPS23 PE=1 SV=3	4	4	81	710000000	450000000	340000000	600000000	490000000	560000000	580000000	497500000	0.857759	-0.221356	0.640527	0.193462	525000000	545000000	0.905172	0.939655	-0.143735	-0.0897967	4	FALSE	TRUE	TRUE	160	411	38.9294	Tnon_mito	S23|P62266	ENSG00000186468
HYOU1	Hypoxia up-regulated protein 1 OS=Homo sapiens GN=HYOU1 PE=1 SV=1	33	33	237	190000000	170000000	210000000	240000000	170000000	160000000	180000000	195000000	1.08333	0.115477	0.514929	0.288253	165000000	205000000	0.916667	1.13889	-0.125531	0.187627	4	FALSE	TRUE	TRUE	50	411	12.1655	Tnon_mito	GRP-170|Grp170|HSP12A|ORP-150|ORP150|Q9Y4L1	ENSG00000149428
HSPA4L	Heat shock 70 kDa protein 4L OS=Homo sapiens GN=HSPA4L PE=2 SV=2	12	16	59	55000000	41000000	47000000	38000000	57000000	32000000	48000000	43500000	0.90625	-0.142019	0.656584	0.18271	44500000	47500000	0.927083	0.989583	-0.109229	-0.0151069	4	FALSE	TRUE	TRUE	74	411	18.0049	Tnon_mito	APG-1|HSPH3|Osp94|O95757	ENSG00000164070
GPD1L	Glycerol-3-phosphate dehydrogenase 1-like protein OS=Homo sapiens GN=GPD1L PE=1 SV=1	1	1	1		26000000					13000000	0	0		0.5	0.30103	0	0	0	0			0	FALSE	FALSE	FALSE	1	411	0.243309	Tnon_mito	GPD1-L|Q8N335	ENSG00000152642
LRRC40	Leucine-rich repeat-containing protein 40 OS=Homo sapiens GN=LRRC40 PE=1 SV=1	2	2	3		22000000		27000000			11000000	6750000	0.613636	-0.704544	0.776087	0.11009	0	13500000	0	1.22727		0.295456	1	FALSE	FALSE	FALSE	9	411	2.18978	Tnon_mito	dJ677H15.1|Q9H9A6	ENSG00000066557
PAICS	Multifunctional protein ADE2 OS=Homo sapiens GN=PAICS PE=1 SV=3	17	17	98	270000000	260000000	150000000	150000000	91000000	100000000	265000000	122750000	0.463208	-1.11027	0.00176328	2.75368	95500000	120500000	0.360377	0.454717	-1.47242	-1.13696	4	TRUE	TRUE	TRUE	106	411	25.7908	Tmito	ADE2|ADE2H1|AIRC|PAIS|P22234	ENSG00000128050
RPP40	Ribonuclease P protein subunit p40 OS=Homo sapiens GN=RPP40 PE=1 SV=3	2	2	2	20000000						10000000	0	0		0.5	0.30103	0	0	0	0			0	FALSE	FALSE	FALSE	0	411	0	Tnon_mito	RNASEP1|bA428J1.3|O75818	ENSG00000124787
CTSB	Cathepsin B OS=Homo sapiens GN=CTSB PE=1 SV=3	7	7	38	65000000	55000000	87000000	100000000	57000000	71000000	60000000	78750000	1.3125	0.392317	0.152458	0.81685	64000000	78500000	1.06667	1.30833	0.0931094	0.38773	4	FALSE	TRUE	TRUE	12	411	2.91971	Tpossible_mito	APPS|CPSB|P07858	ENSG00000164733
SIGMAR1	Sigma non-opioid intracellular receptor 1 OS=Homo sapiens GN=SIGMAR1 PE=1 SV=1	3	3	9	65000000	43000000	41000000	49000000	49000000	53000000	54000000	48000000	0.888889	-0.169925	0.681877	0.166294	51000000	49000000	0.944444	0.907407	-0.0824622	-0.140178	4	FALSE	TRUE	TRUE	1	411	0.243309	Tnon_mito	ALS16|OPRS1|SIG-1R|SR-BP|SR-BP1|SRBP|hSigmaR1|sigma1R|Q99720	ENSG00000147955
MMGT1	Isoform 2 of Membrane magnesium transporter 1 OS=Homo sapiens GN=MMGT1	1	1	2	60000000	42000000					51000000	0	0		0.1112	0.953896	0	0	0	0			0	FALSE	FALSE	FALSE	2	411	0.486618	Tnon_mito	EMC5|TMEM32|Q8N4V1	ENSG00000169446
TFRC	Transferrin receptor protein 1 OS=Homo sapiens GN=TFRC PE=1 SV=2	16	16	73	80000000	83000000	92000000	130000000	100000000	94000000	81500000	104000000	1.27607	0.351712	0.0823644	1.08426	97000000	115000000	1.19018	1.41104	0.251185	0.496762	4	FALSE	TRUE	TRUE	47	411	11.4355	Tpossible_mito	CD71|T9|TFR|TFR1|TR|TRFR|p90|P02786	ENSG00000072274
RAD23B	UV excision repair protein RAD23 homolog B OS=Homo sapiens GN=RAD23B PE=1 SV=1	9	9	36	110000000	79000000	69000000	64000000	62000000	64000000	94500000	64750000	0.685185	-0.545434	0.303469	0.517886	63000000	63000000	0.666667	0.666667	-0.584963	-0.584963	4	FALSE	TRUE	TRUE	23	411	5.59611	Tnon_mito	HHR23B|HR23B|P58|P54727	ENSG00000119318
BAG3	BAG family molecular chaperone regulator 3 OS=Homo sapiens GN=BAG3 PE=1 SV=3	4	4	7	10000000	14000000	4100000	12000000			12000000	4025000	0.335417	-1.57597	0.0851925	1.0696	0	6000000	0	0.5		-1	2	FALSE	TRUE	TRUE	27	411	6.56934	Tnon_mito	BAG-3|BIS|CAIR-1|MFM6|O95817	ENSG00000151929
TRIM41	E3 ubiquitin-protein ligase TRIM41 (Fragment) OS=Homo sapiens GN=TRIM41 PE=4 SV=1	1	1	1						62000000	0	15500000	100	6.64386	0.391002	0.407821	31000000	0	100	0	6.64386		1	FALSE	FALSE	FALSE	3	411	0.729927	Tnon_mito	RINCK|Q8WV44	ENSG00000146063
DCTN1	Uncharacterized protein OS=Homo sapiens GN=DCTN1 PE=4 SV=1	24	24	76	60000000	100000000	38000000	91000000	59000000	40000000	80000000	57000000	0.7125	-0.489038	0.439533	0.357008	49500000	75000000	0.61875	0.9375	-0.692571	-0.0931094	4	FALSE	TRUE	TRUE	85	411	20.6813	Tnon_mito	DAP-150|DP-150|P135|Q14203	ENSG00000204843
HDDC2	HD domain-containing protein 2 OS=Homo sapiens GN=HDDC2 PE=1 SV=1	1	1	2	16000000	15000000					15500000	0	0		0.020529	1.68763	0	0	0	0			0	TRUE	FALSE	FALSE	8	411	1.94647	Tpossible_mito	C6orf74|NS5ATP2|dJ167O5.2|Q7Z4H3	ENSG00000111906
RPS29	Isoform 2 of 40S ribosomal protein S29 OS=Homo sapiens GN=RPS29	2	2	17	420000000	270000000	220000000	140000000	95000000	280000000	345000000	183750000	0.532609	-0.908852	0.226792	0.644373	187500000	117500000	0.543478	0.34058	-0.879706	-1.55394	4	FALSE	FALSE	TRUE	63	411	15.3285	Tnon_mito	S29|P62273	ENSG00000213741
PEX19	Peroxisomal biogenesis factor 19 OS=Homo sapiens GN=PEX19 PE=1 SV=1	1	1	10	50000000	43000000	43000000	44000000	31000000	42000000	46500000	40000000	0.860215	-0.217231	0.268622	0.570858	36500000	37500000	0.784946	0.806452	-0.349334	-0.31034	4	FALSE	FALSE	TRUE	1	411	0.243309	Tnon_mito	D1S2223E|HK33|PBD12A|PMP1|PMPI|PXF|PXMP1|P40855	ENSG00000162735
SGPL1	Sphingosine-1-phosphate lyase 1 OS=Homo sapiens GN=SGPL1 PE=1 SV=3	6	6	14	26000000	15000000	13000000	35000000	12000000	39000000	20500000	24750000	1.20732	0.271805	0.663228	0.178337	25500000	23500000	1.2439	1.14634	0.314873	0.197037	4	FALSE	TRUE	TRUE	10	411	2.43309	Tnon_mito	S1PL|SPL|O95470	ENSG00000166224
GIT1	ARF GTPase-activating protein GIT1 (Fragment) OS=Homo sapiens GN=GIT1 PE=2 SV=3	1	1	1		3700000					1850000	0	0		0.5	0.30103	0	0	0	0			0	FALSE	FALSE	FALSE	9	411	2.18978	Tnon_mito	Q9Y2X7	ENSG00000108262
ATIC	Bifunctional purine biosynthesis protein PURH OS=Homo sapiens GN=ATIC PE=1 SV=3	16	16	50	91000000	100000000	34000000	51000000	29000000	17000000	95500000	32750000	0.342932	-1.54401	0.00174588	2.75799	23000000	40000000	0.240838	0.418848	-2.05387	-1.2555	4	TRUE	TRUE	TRUE	36	411	8.75912	Tmito	AICAR|AICARFT|HEL-S-70p|IMPCHASE|PURH|P31939	ENSG00000138363
SLMAP	Sarcolemmal membrane-associated protein OS=Homo sapiens GN=SLMAP PE=1 SV=1	1	1	2			80000000	74000000			0	38500000	100	6.64386	0.182173	0.739516	0	37000000	0	100		6.64386	2	FALSE	FALSE	FALSE	1	411	0.243309	Tnon_mito	SLAP|Q14BN4	ENSG00000163681
REEP5	Receptor expression-enhancing protein 5 OS=Homo sapiens GN=REEP5 PE=1 SV=3	2	3	10	220000000	170000000	97000000	250000000	89000000	16000000	195000000	113000000	0.579487	-0.787151	0.212049	0.673564	52500000	169500000	0.269231	0.869231	-1.89308	-0.202189	4	FALSE	TRUE	TRUE	4	411	0.973236	Tnon_mito	C5orf18|D5S346|DP1|TB2|YOP1|Q00765	ENSG00000129625
REEP5	Receptor expression-enhancing protein 5 (Fragment) OS=Homo sapiens GN=REEP5 PE=4 SV=1	1	2	2		120000000					60000000	0	0		0.5	0.30103	0	0	0	0			0	FALSE	FALSE	FALSE	4	411	0.973236	Tnon_mito	C5orf18|D5S346|DP1|TB2|YOP1|Q00765	ENSG00000129625
PLD3	Phospholipase D3 OS=Homo sapiens GN=PLD3 PE=1 SV=1	2	2	5	15000000	17000000	18000000	27000000	14000000		16000000	14750000	0.921875	-0.117357	0.839908	0.0757683	7000000	20500000	0.4375	1.28125	-1.19265	0.357552	3	FALSE	FALSE	TRUE	17	411	4.13625	Tnon_mito	HU-K4|HUK4|Q8IV08	ENSG00000105223
SAR1A	GTP-binding protein SAR1a OS=Homo sapiens GN=SAR1A PE=1 SV=1	4	5	11	38000000	46000000	25000000	42000000	34000000		42000000	25250000	0.60119	-0.734106	0.170361	0.76863	17000000	38000000	0.404762	0.904762	-1.30485	-0.14439	3	FALSE	TRUE	TRUE	17	411	4.13625	Tnon_mito	SAR1|SARA1|Sara|masra2|Q9NR31	ENSG00000079332
CUTA	Isoform A of Protein CutA OS=Homo sapiens GN=CUTA	4	4	18	100000000	130000000	40000000	63000000	22000000	38000000	115000000	40750000	0.354348	-1.49676	0.0673455	1.17169	30000000	42500000	0.26087	0.369565	-1.9386	-1.4361	4	FALSE	TRUE	TRUE	4	411	0.973236	Tnon_mito	ACHAP|C6orf82|O60888	ENSG00000112514
WBSCR16	Williams-Beuren syndrome chromosomal region 16 protein OS=Homo sapiens GN=WBSCR16 PE=1 SV=2	1	1	4			23000000	27000000	16000000	20000000	0	21500000	100	6.64386	0.00268367	2.57127	18000000	21500000	100	100	6.64386	6.64386	4	TRUE	FALSE	FALSE	9	411	2.18978	Tmito	Q96I51	ENSG00000174374
RRM2	Isoform 2 of Ribonucleoside-diphosphate reductase subunit M2 OS=Homo sapiens GN=RRM2	4	4	8	64000000	30000000		25000000	16000000	19000000	47000000	15000000	0.319149	-1.6477	0.290164	0.537356	17500000	20500000	0.37234	0.43617	-1.42531	-1.19704	3	FALSE	TRUE	TRUE	31	411	7.54258	Tnon_mito	R2|RR2|RR2M|P31350	ENSG00000171848
NPC1	Niemann-Pick C1 protein OS=Homo sapiens GN=NPC1 PE=1 SV=2	1	1	1				28000000			0	7000000	100	6.64386	0.391002	0.407821	0	14000000	0	100		6.64386	1	FALSE	FALSE	FALSE	1	411	0.243309	Tnon_mito	NPC|O15118	ENSG00000141458
CREG1	Protein CREG1 OS=Homo sapiens GN=CREG1 PE=1 SV=1	1	1	7	58000000	59000000	65000000	83000000	42000000	39000000	58500000	57250000	0.978632	-0.0311609	0.911687	0.0401543	40500000	62500000	0.692308	1.06838	-0.530515	0.0954196	4	FALSE	FALSE	TRUE	3	411	0.729927	Tnon_mito	CREG|O75629	ENSG00000143162
EIF5A	Eukaryotic translation initiation factor 5A-1 OS=Homo sapiens GN=EIF5A PE=1 SV=2	9	9	111	440000000	650000000	230000000	460000000	300000000	210000000	545000000	300000000	0.550459	-0.861294	0.205289	0.687635	255000000	380000000	0.46789	0.697248	-1.09576	-0.520257	4	FALSE	TRUE	TRUE	125	411	30.4136	Tnon_mito	EIF-5A|EIF5A1|eIF5AI|P63241	ENSG00000132507
ABCE1	ATP-binding cassette sub-family E member 1 (Fragment) OS=Homo sapiens GN=ABCE1 PE=2 SV=1	1	2	2					23000000		0	5750000	100	6.64386	0.391002	0.407821	11500000	11500000	100	100	6.64386	6.64386	1	FALSE	FALSE	FALSE	40	411	9.73236	Tpossible_mito	ABC38|OABP|RLI|RNASEL1|RNASELI|RNS4I|P61221	ENSG00000164163
ABCE1	ATP-binding cassette sub-family E member 1 OS=Homo sapiens GN=ABCE1 PE=1 SV=1	13	14	54	110000000	120000000	91000000	180000000	140000000	70000000	115000000	120250000	1.04565	0.064403	0.847607	0.0718055	105000000	160000000	0.913043	1.3913	-0.131245	0.476438	4	FALSE	TRUE	TRUE	40	411	9.73236	Tpossible_mito	ABC38|OABP|RLI|RNASEL1|RNASELI|RNS4I|P61221	ENSG00000164163
GSPT1	Isoform 3 of Eukaryotic peptide chain release factor GTP-binding subunit ERF3A OS=Homo sapiens GN=GSPT1	8	8	27	91000000	83000000	57000000	67000000	32000000	42000000	87000000	49500000	0.568966	-0.813587	0.0129919	1.88633	37000000	49500000	0.425287	0.568966	-1.23349	-0.813587	4	TRUE	TRUE	TRUE	59	411	14.3552	Tnon_mito	551G9.2|ETF3A|GST1|eRF3a|P15170	ENSG00000103342
MARS	Methionine--tRNA ligase, cytoplasmic OS=Homo sapiens GN=MARS PE=1 SV=2	22	22	92	180000000	140000000	100000000	150000000	110000000	100000000	160000000	115000000	0.71875	-0.476438	0.209878	0.678032	105000000	130000000	0.65625	0.8125	-0.607683	-0.29956	4	FALSE	TRUE	TRUE	107	411	26.0341	Tpossible_mito	METRS|MRS|MTRNS|P56192	ENSG00000166986
PA2G4	Proliferation-associated protein 2G4 OS=Homo sapiens GN=PA2G4 PE=1 SV=3	17	17	161	790000000	480000000	560000000	620000000	430000000	620000000	635000000	557500000	0.877953	-0.187785	0.705244	0.151661	525000000	525000000	0.826772	0.826772	-0.274439	-0.274439	4	FALSE	TRUE	TRUE	104	411	25.3041	Tnon_mito	EBP1|HG4-1|p38-2G4|Q9UQ80	ENSG00000170515
ANKS1A	Ankyrin repeat and SAM domain-containing protein 1A OS=Homo sapiens GN=ANKS1A PE=1 SV=4	1	1	1	20000000						10000000	0	0		0.5	0.30103	0	0	0	0			0	FALSE	FALSE	FALSE	16	411	3.89294	Tnon_mito	ANKS1|Q92625	ENSG00000064999
GNL2	Nucleolar GTP-binding protein 2 OS=Homo sapiens GN=GNL2 PE=1 SV=1	1	1	3	17000000		13000000			13000000	8500000	6500000	0.764706	-0.387023	0.856523	0.0672608	6500000	0	0.764706	0	-0.387023		2	FALSE	FALSE	FALSE	45	411	10.9489	Tnon_mito	HUMAUANTIG|NGP1|Ngp-1|Q13823	ENSG00000134697
LARS	Leucine--tRNA ligase, cytoplasmic OS=Homo sapiens GN=LARS PE=1 SV=2	26	26	90	150000000	110000000	63000000	91000000	67000000	68000000	130000000	72250000	0.555769	-0.847442	0.185969	0.73056	67500000	79000000	0.519231	0.607692	-0.945552	-0.718587	4	FALSE	TRUE	TRUE	131	411	31.8735	Tnon_mito	HSPC192|LARS1|LEURS|LEUS|LFIS|LRS|PIG44|RNTLS|hr025Cl|Q9P2J5	ENSG00000133706
DNAJB11	DnaJ homolog subfamily B member 11 OS=Homo sapiens GN=DNAJB11 PE=1 SV=1	4	4	16	41000000	35000000	62000000	72000000	57000000	56000000	38000000	61750000	1.625	0.70044	0.00997532	2.00107	56500000	64500000	1.48684	1.69737	0.572251	0.7633	4	TRUE	TRUE	TRUE	52	411	12.6521	Tnon_mito	ABBP-2|ABBP2|DJ9|Dj-9|EDJ|ERdj3|ERj3|ERj3p|PRO1080|UNQ537|hDj-9|Q9UBS4	ENSG00000090520
EXOSC4	Exosome complex component RRP41 OS=Homo sapiens GN=EXOSC4 PE=1 SV=3	2	2	4	28000000	21000000					24500000	0	0		0.0903345	1.04415	0	0	0	0			0	FALSE	FALSE	FALSE	33	411	8.0292	Tnon_mito	RRP41|RRP41A|Rrp41p|SKI6|Ski6p|hRrp41p|p12A|Q9NPD3	ENSG00000178896
SORD	Sorbitol dehydrogenase OS=Homo sapiens GN=SORD PE=1 SV=4	1	1	1	73000000						36500000	0	0		0.5	0.30103	0	0	0	0			0	FALSE	FALSE	FALSE	8	411	1.94647	Tpossible_mito	HEL-S-95n|SORD1|Q00796	ENSG00000140263
RPS13	40S ribosomal protein S13 OS=Homo sapiens GN=RPS13 PE=1 SV=2	7	7	45	520000000	780000000	300000000	900000000	560000000	350000000	650000000	527500000	0.811538	-0.301269	0.559942	0.251857	455000000	730000000	0.7	1.12308	-0.514573	0.167457	4	FALSE	TRUE	TRUE	158	411	38.4428	Tnon_mito	S13|P62277	ENSG00000110700
GNS	N-acetylglucosamine-6-sulfatase OS=Homo sapiens GN=GNS PE=2 SV=1	7	7	25	53000000	42000000	64000000	87000000	56000000	65000000	47500000	68000000	1.43158	0.517607	0.0847557	1.07183	60500000	71500000	1.27368	1.50526	0.349008	0.590016	4	FALSE	TRUE	TRUE	6	411	1.45985	Tnon_mito	G6S|P15586	ENSG00000135677
PRKDC	DNA-dependent protein kinase catalytic subunit OS=Homo sapiens GN=PRKDC PE=1 SV=3	87	87	360	180000000	190000000	170000000	170000000	110000000	120000000	185000000	142500000	0.77027	-0.376563	0.0729319	1.13708	115000000	140000000	0.621622	0.756757	-0.685891	-0.402098	4	FALSE	TRUE	TRUE	175	411	42.5791	Tnon_mito	DNA-PKcs|DNAPK|DNPK1|HYRC|HYRC1|XRCC7|p350|P78527	ENSG00000253729
RNPEP	Aminopeptidase B OS=Homo sapiens GN=RNPEP PE=1 SV=2	1	1	1		28000000					14000000	0	0		0.5	0.30103	0	0	0	0			0	FALSE	FALSE	FALSE	10	411	2.43309	Tnon_mito	Q9H4A4	ENSG00000176393
HSPA1L	Heat shock 70 kDa protein 1-like OS=Homo sapiens GN=HSPA1L PE=1 SV=2	2	12	473	290000000	220000000	160000000	170000000	160000000	100000000	255000000	147500000	0.578431	-0.789782	0.153133	0.814931	130000000	165000000	0.509804	0.647059	-0.971986	-0.628031	4	FALSE	TRUE	TRUE	389	411	94.6472	Tpossible_mito	HSP70-1L|HSP70-HOM|HSP70T|hum70t|P34931	ENSG00000204390
RPSA	40S ribosomal protein SA OS=Homo sapiens GN=RPSA PE=1 SV=4	13	13	197	1600000000	1500000000	1200000000	1700000000	1200000000	1200000000	1550000000	1325000000	0.854839	-0.226276	0.17475	0.757582	1200000000	1450000000	0.774194	0.935484	-0.369234	-0.0962153	4	FALSE	TRUE	TRUE	160	411	38.9294	Tnon_mito	37LRP|67LR|LAMBR|LAMR1|LBP|LBP/p40|LRP|LRP/LR|NEM/1CHD4|SA|lamR|p40|P08865	ENSG00000168028
RPL17	Isoform 3 of 60S ribosomal protein L17 OS=Homo sapiens GN=RPL17	6	6	90	910000000	900000000	610000000	940000000	670000000	560000000	905000000	695000000	0.767956	-0.380905	0.0890913	1.05016	615000000	805000000	0.679558	0.889503	-0.557331	-0.168929	4	FALSE	TRUE	TRUE	190	411	46.2287	Tnon_mito	L17|PD-1|RPL23|P18621	ENSG00000215472
RPS2	40S ribosomal protein S2 OS=Homo sapiens GN=RPS2 PE=1 SV=2	10	10	115	1000000000	830000000	680000000	760000000	620000000	680000000	915000000	685000000	0.748634	-0.417668	0.196635	0.70634	650000000	690000000	0.710383	0.754098	-0.493332	-0.407175	4	FALSE	TRUE	TRUE	210	411	51.0949	Tnon_mito	LLREP3|S2|P15880	ENSG00000140988
RPS20	Isoform 2 of 40S ribosomal protein S20 OS=Homo sapiens GN=RPS20	4	4	52	430000000	420000000	550000000	600000000	440000000	410000000	425000000	500000000	1.17647	0.234465	0.193352	0.713651	425000000	520000000	1	1.22353	0	0.291049	4	FALSE	TRUE	TRUE	179	411	43.5523	Tnon_mito	S20|P60866	ENSG00000008988
TCP1	T-complex protein 1 subunit alpha OS=Homo sapiens GN=TCP1 PE=1 SV=1	29	29	252	540000000	410000000	290000000	360000000	280000000	300000000	475000000	307500000	0.647368	-0.627341	0.215632	0.666286	290000000	320000000	0.610526	0.673684	-0.711875	-0.569856	4	FALSE	TRUE	TRUE	184	411	44.7689	Tnon_mito	CCT-alpha|CCT1|CCTa|D6S230E|TCP-1-alpha|P17987	ENSG00000120438
CCT8	T-complex protein 1 subunit theta OS=Homo sapiens GN=CCT8 PE=1 SV=4	26	26	276	810000000	590000000	340000000	430000000	440000000	430000000	700000000	410000000	0.585714	-0.771731	0.218221	0.661104	435000000	435000000	0.621429	0.621429	-0.68634	-0.68634	4	FALSE	TRUE	TRUE	183	411	44.5255	Tnon_mito	C21orf112|Cctq|D21S246|PRED71|P50990	ENSG00000156261
TXNDC12	Thioredoxin domain-containing protein 12 OS=Homo sapiens GN=TXNDC12 PE=1 SV=1	5	5	16	110000000	62000000	53000000	78000000	45000000	64000000	86000000	60000000	0.697674	-0.519374	0.466002	0.331612	54500000	61500000	0.633721	0.715116	-0.65808	-0.48375	4	FALSE	TRUE	TRUE	63	411	15.3285	Tmito	AG1|AGR1|ERP16|ERP18|ERP19|PDIA16|TLP19|hAG-1|hTLP19|O95881	ENSG00000117862
MTPN	Myotrophin OS=Homo sapiens GN=MTPN PE=1 SV=2	3	3	11	120000000	130000000	39000000	76000000			125000000	28750000	0.23	-2.12029	0.010657	1.97237	0	38000000	0	0.304		-1.71786	2	TRUE	TRUE	TRUE	28	411	6.81265	Tnon_mito	GCDP|V-1|P58546	ENSG00000105887
GSTP1	Glutathione S-transferase P OS=Homo sapiens GN=GSTP1 PE=1 SV=2	9	9	60	350000000	490000000	120000000	120000000	200000000	130000000	420000000	142500000	0.339286	-1.55943	0.136234	0.865714	165000000	160000000	0.392857	0.380952	-1.34792	-1.39232	4	FALSE	TRUE	TRUE	74	411	18.0049	Tpossible_mito	DFN7|FAEES3|GST3|GSTP|HEL-S-22|PI|P09211	ENSG00000084207
MYO7A	Unconventional myosin-VIIa OS=Homo sapiens GN=MYO7A PE=1 SV=2	1	1	1		38000000					19000000	0	0		0.5	0.30103	0	0	0	0			0	FALSE	FALSE	FALSE	0	411	0	Tnon_mito	DFNA11|DFNB2|MYOVIIA|MYU7A|NSRD2|USH1B|Q13402	ENSG00000137474
PSMA2	Proteasome subunit alpha type-2 OS=Homo sapiens GN=PSMA2 PE=1 SV=2	7	7	52	210000000	200000000	100000000	160000000	86000000	120000000	205000000	116500000	0.568293	-0.815294	0.00896752	2.04733	103000000	123000000	0.502439	0.6	-0.99298	-0.736966	4	TRUE	TRUE	TRUE	93	411	22.6277	Tnon_mito	HC3|MU|PMSA2|PSC2|P25787	ENSG00000106588
GPHN	Molybdopterin molybdenumtransferase OS=Homo sapiens GN=GPHN PE=2 SV=1	2	2	3	29000000	19000000					24000000	0	0		0.130759	0.883529	0	0	0	0			0	FALSE	FALSE	FALSE	26	411	6.32603	Tnon_mito	GEPH|GPH|GPHRYN|HKPX1|MOCODC|Q9NQX3	ENSG00000171723
TUBA8	Tubulin alpha-8 chain (Fragment) OS=Homo sapiens GN=TUBA8 PE=4 SV=1	1	6	79	280000000	240000000	57000000	100000000	110000000	140000000	260000000	101750000	0.391346	-1.35348	0.0144153	1.84118	125000000	105000000	0.480769	0.403846	-1.05658	-1.30812	4	TRUE	TRUE	TRUE	375	411	91.2409	Tnon_mito	TUBAL2	ENSG00000183785
BRI3BP	BRI3-binding protein OS=Homo sapiens GN=BRI3BP PE=1 SV=1	2	2	18	36000000	43000000	47000000	54000000	51000000	51000000	39500000	50750000	1.28481	0.361555	0.151427	0.819797	51000000	52500000	1.29114	1.32911	0.368645	0.410465	4	FALSE	FALSE	TRUE	5	411	1.21655	Tpossible_mito	BNAS1|HCCR-1|HCCR-2|HCCRBP-1|KG19|Q8WY22	ENSG00000184992
UBQLN4	Ubiquilin-4 OS=Homo sapiens GN=UBQLN4 PE=1 SV=2	3	4	8		11000000	50000000		15000000		5500000	16250000	2.95455	1.56294	0.456319	0.340731	7500000	7500000	1.36364	1.36364	0.447459	0.447459	2	FALSE	TRUE	TRUE	4	411	0.973236	Tnon_mito	A1U|A1Up|C1orf6|CIP75|UBIN|Q9NRR5	ENSG00000160803
EEF1G	Elongation factor 1-gamma OS=Homo sapiens GN=EEF1G PE=1 SV=3	25	25	279	1500000000	1300000000	910000000	1800000000	1000000000	1000000000	1400000000	1177500000	0.841071	-0.2497	0.391649	0.407103	1000000000	1400000000	0.714286	1	-0.485427	0	4	FALSE	TRUE	TRUE	193	411	46.9586	Tnon_mito	EF1G|GIG35|P26641	ENSG00000254772
EHD4	EH domain-containing protein 4 OS=Homo sapiens GN=EHD4 PE=1 SV=1	4	4	7	30000000	21000000	19000000	58000000	15000000	16000000	25500000	27000000	1.05882	0.0824622	0.901101	0.0452266	15500000	36500000	0.607843	1.43137	-0.718229	0.517399	4	FALSE	TRUE	TRUE	3	411	0.729927	Tnon_mito	PAST4|Q9H223	ENSG00000103966
AMPD2	AMP deaminase 2 OS=Homo sapiens GN=AMPD2 PE=1 SV=2	1	1	1				48000000			0	12000000	100	6.64386	0.391002	0.407821	0	24000000	0	100		6.64386	1	FALSE	FALSE	FALSE	7	411	1.70316	Tnon_mito	Q01433	ENSG00000116337
TRMT112	tRNA methyltransferase 112 homolog OS=Homo sapiens GN=TRMT112 PE=1 SV=1	4	4	19	62000000	40000000	35000000	49000000	31000000	48000000	51000000	40750000	0.79902	-0.323697	0.514356	0.288736	39500000	40000000	0.77451	0.784314	-0.368645	-0.350497	4	FALSE	TRUE	TRUE	25	411	6.08273	Tnon_mito	HSPC152|HSPC170|TRM112|TRMT11-2|Q9UI30	ENSG00000173113
COPS8	COP9 signalosome complex subunit 8 OS=Homo sapiens GN=COPS8 PE=1 SV=1	4	4	6	65000000	17000000	24000000	29000000		10000000	41000000	15750000	0.384146	-1.38027	0.47673	0.321728	5000000	14500000	0.121951	0.353659	-3.03562	-1.49957	3	FALSE	TRUE	TRUE	28	411	6.81265	Tnon_mito	COP9|CSN8|SGN8|Q99627	ENSG00000198612
MSH6	DNA mismatch repair protein Msh6 OS=Homo sapiens GN=MSH6 PE=1 SV=2	6	6	11	54000000	27000000	16000000	31000000	15000000	18000000	40500000	20000000	0.493827	-1.01792	0.357439	0.446798	16500000	23000000	0.407407	0.567901	-1.29546	-0.816288	4	FALSE	TRUE	TRUE	56	411	13.6253	Tnon_mito	GTBP|GTMBP|HNPCC5|HSAP|p160|P52701	ENSG00000116062
GMPPA	Isoform 2 of Mannose-1-phosphate guanyltransferase alpha OS=Homo sapiens GN=GMPPA	1	1	2	12000000	14000000					13000000	0	0		0.0488745	1.31092	0	0	0	0			0	TRUE	FALSE	FALSE	3	411	0.729927	Tnon_mito	AAMR|Q96IJ6	ENSG00000144591
DNAJC1	DnaJ homolog subfamily C member 1 OS=Homo sapiens GN=DNAJC1 PE=1 SV=1	2	2	6	28000000		23000000	29000000	19000000	28000000	14000000	24750000	1.76786	0.822002	0.581808	0.235221	23500000	24000000	1.67857	1.71429	0.747234	0.777608	4	FALSE	FALSE	TRUE	0	411	0	Tnon_mito	DNAJL1|ERdj1|HTJ1|MTJ1|Q96KC8	ENSG00000136770
CARS	Isoform 3 of Cysteine--tRNA ligase, cytoplasmic OS=Homo sapiens GN=CARS	1	1	1	13000000						6500000	0	0		0.5	0.30103	0	0	0	0			0	FALSE	FALSE	FALSE	11	411	2.6764	Tnon_mito	CARS1|CYSRS|MGC:11246|P49589	ENSG00000110619
MSH2	DNA mismatch repair protein Msh2 OS=Homo sapiens GN=MSH2 PE=1 SV=1	8	8	40	41000000	43000000	42000000	54000000	31000000	33000000	42000000	40000000	0.952381	-0.0703893	0.731331	0.135886	32000000	42500000	0.761905	1.0119	-0.392317	0.0170735	4	FALSE	TRUE	TRUE	45	411	10.9489	Tnon_mito	COCA1|FCC1|HNPCC|HNPCC1|LCFS2|P43246	ENSG00000095002
NOTCH2	Neurogenic locus notch homolog protein 2 OS=Homo sapiens GN=NOTCH2 PE=1 SV=3	1	1	1				17000000			0	4250000	100	6.64386	0.391002	0.407821	0	8500000	0	100		6.64386	1	FALSE	FALSE	FALSE	7	411	1.70316	Tnon_mito	AGS2|HJCYS|hN2|Q04721	ENSG00000134250
PEPD	Xaa-Pro dipeptidase OS=Homo sapiens GN=PEPD PE=1 SV=3	2	2	5	58000000	46000000		74000000	12000000		52000000	21500000	0.413462	-1.27417	0.186648	0.728977	6000000	43000000	0.115385	0.826923	-3.11548	-0.274175	2	FALSE	FALSE	TRUE	7	411	1.70316	Tnon_mito	PROLIDASE|P12955	ENSG00000124299
EXOSC10	Exosome component 10 OS=Homo sapiens GN=EXOSC10 PE=1 SV=2	3	3	4	11000000	11000000				21000000	11000000	5250000	0.477273	-1.06711	0.353465	0.451653	10500000	0	0.954545	0	-0.0671142		1	FALSE	TRUE	FALSE	70	411	17.0316	Tnon_mito	PM-Scl|PM/Scl-100|PMSCL|PMSCL2|RRP6|Rrp6p|p2|p3|p4|Q01780	ENSG00000171824
PSMC4	26S protease regulatory subunit 6B OS=Homo sapiens GN=PSMC4 PE=1 SV=2	7	7	42	120000000	170000000	100000000	130000000	82000000	75000000	145000000	96750000	0.667241	-0.583719	0.263895	0.578569	78500000	106000000	0.541379	0.731034	-0.885288	-0.451989	4	FALSE	TRUE	TRUE	97	411	23.601	Tpossible_mito	MIP224|RPT3|S6|TBP-7|TBP7|P43686	ENSG00000013275
SARS	Serine--tRNA ligase, cytoplasmic OS=Homo sapiens GN=SARS PE=2 SV=1	11	11	35	81000000	90000000	66000000	76000000	34000000	44000000	85500000	55000000	0.643275	-0.636493	0.0475526	1.32283	39000000	55000000	0.45614	0.643275	-1.13245	-0.636493	4	TRUE	TRUE	TRUE	15	411	3.64964	Tpossible_mito	SERRS|SERS|P49591	ENSG00000031698
DNAJB6	DnaJ homolog subfamily B member 6 OS=Homo sapiens GN=DNAJB6 PE=1 SV=2	1	1	7	22000000	18000000	12000000	13000000	9300000	13000000	20000000	11825000	0.59125	-0.75816	0.108199	0.965777	11150000	11150000	0.5575	0.5575	-0.842956	-0.842956	4	FALSE	FALSE	TRUE	25	411	6.08273	Tnon_mito	DJ4|DnaJ|HHDJ1|HSJ-2|HSJ2|LGMD1D|LGMD1E|MRJ|MSJ-1|O75190	ENSG00000105993
ABCF2	Isoform 2 of ATP-binding cassette sub-family F member 2 OS=Homo sapiens GN=ABCF2	7	7	34	60000000	56000000	53000000	59000000	35000000	46000000	58000000	48250000	0.831897	-0.265524	0.157968	0.801431	40500000	47000000	0.698276	0.810345	-0.518131	-0.303392	4	FALSE	TRUE	TRUE	24	411	5.83942	Tmito	ABC28|EST133090|HUSSY18|Q9UG63	ENSG00000033050
ASCC3	Activating signal cointegrator 1 complex subunit 3 OS=Homo sapiens GN=ASCC3 PE=1 SV=3	4	4	12	17000000	24000000	24000000	19000000	13000000	15000000	20500000	17750000	0.865854	-0.207805	0.583682	0.233824	14000000	16000000	0.682927	0.780488	-0.550197	-0.357552	4	FALSE	TRUE	TRUE	39	411	9.48905	Tnon_mito	ASC1p200|HELIC1|RNAH|Q8N3C0	ENSG00000112249
INVS	Inversin OS=Homo sapiens GN=INVS PE=2 SV=1	1	1	1				26000000			0	6500000	100	6.64386	0.391002	0.407821	0	13000000	0	100		6.64386	1	FALSE	FALSE	FALSE	0	411	0	Tnon_mito	INV|NPH2|NPHP2|Q9Y283	ENSG00000119509
OLA1	Obg-like ATPase 1 OS=Homo sapiens GN=OLA1 PE=2 SV=1	9	9	31	79000000	72000000	46000000	48000000	31000000	33000000	75500000	39500000	0.523179	-0.934624	0.00421823	2.37487	32000000	39500000	0.423841	0.523179	-1.2384	-0.934624	4	TRUE	TRUE	TRUE	41	411	9.97567	Tnon_mito	DOC45|GBP45|GTBP9|GTPBP9|Q9NTK5	ENSG00000138430
SHANK1	SH3 and multiple ankyrin repeat domains protein 1 OS=Homo sapiens GN=SHANK1 PE=2 SV=1	1	1	1		12000000					6000000	0	0		0.5	0.30103	0	0	0	0			0	FALSE	FALSE	FALSE	0	411	0	Tnon_mito	SPANK-1|SSTRIP|synamon|Q9Y566	ENSG00000161681
PDXP	Pyridoxal phosphate phosphatase OS=Homo sapiens GN=PDXP PE=1 SV=2	1	1	2	9500000	6800000					8150000	0	0		0.104503	0.980869	0	0	0	0			0	FALSE	FALSE	FALSE	4	411	0.973236	Tnon_mito	CIN|PLP|dJ37E16.5|Q96GD0	ENSG00000241360
DNAJC5	DnaJ homolog subfamily C member 5 OS=Homo sapiens GN=DNAJC5 PE=1 SV=1	1	1	2			25000000		24000000		0	12250000	100	6.64386	0.181823	0.740352	12000000	12000000	100	100	6.64386	6.64386	2	FALSE	FALSE	FALSE	0	411	0	Tnon_mito	CLN4|CLN4B|CSP|DNAJC5A|NCL|Q9H3Z4	ENSG00000101152
SPNS1	Protein spinster homolog 1 OS=Homo sapiens GN=SPNS1 PE=1 SV=1	2	2	7	27000000		39000000	46000000	30000000	22000000	13500000	34250000	2.53704	1.34314	0.344216	0.463169	26000000	38000000	1.92593	2.81481	0.945552	1.49304	4	FALSE	FALSE	TRUE	5	411	1.21655	Tpossible_mito	HSpin1|LAT|PP2030|SPIN1|SPINL|nrs|Q9H2V7	ENSG00000169682
FTSJ3	pre-rRNA processing protein FTSJ3 OS=Homo sapiens GN=FTSJ3 PE=1 SV=2	1	1	1			13000000				0	3250000	100	6.64386	0.391002	0.407821	0	0	0	0			1	FALSE	FALSE	FALSE	63	411	15.3285	Tnon_mito	EPCS3|SPB1|Q8IY81	ENSG00000108592
DUSP3	Dual specificity protein phosphatase 3 OS=Homo sapiens GN=DUSP3 PE=1 SV=1	2	2	2	110000000	18000000					64000000	0	0		0.396741	0.401493	0	0	0	0			0	FALSE	FALSE	FALSE	5	411	1.21655	Tnon_mito	VHR|P51452	ENSG00000108861
HNRNPK	Isoform 2 of Heterogeneous nuclear ribonucleoprotein K OS=Homo sapiens GN=HNRNPK	19	19	247	820000000	1000000000	770000000	1000000000	670000000	680000000	910000000	780000000	0.857143	-0.222392	0.364967	0.437746	675000000	835000000	0.741758	0.917582	-0.430979	-0.12409	4	FALSE	TRUE	TRUE	288	411	70.073	Tnon_mito	CSBP|HNRPK|TUNP|P61978	ENSG00000165119
KIF2A	Isoform 2 of Kinesin-like protein KIF2A OS=Homo sapiens GN=KIF2A	1	1	4	9200000		11000000	11000000			4600000	5500000	1.19565	0.257798	0.886704	0.0522215	0	5500000	0	1.19565		0.257798	2	FALSE	FALSE	FALSE	33	411	8.0292	Tnon_mito	CDCBM3|HK2|KIF2|O00139	ENSG00000068796
LIPA	Lysosomal acid lipase/cholesteryl ester hydrolase OS=Homo sapiens GN=LIPA PE=1 SV=2	2	2	7	41000000	36000000	63000000	66000000	34000000	50000000	38500000	53250000	1.38312	0.467923	0.136309	0.865475	42000000	50000000	1.09091	1.2987	0.125531	0.37707	4	FALSE	FALSE	TRUE	1	411	0.243309	Tnon_mito	CESD|LAL|P38571	ENSG00000107798
PLS1	Plastin-1 OS=Homo sapiens GN=PLS1 PE=1 SV=2	1	6	40	140000000	110000000	99000000	110000000	78000000	140000000	125000000	106750000	0.854	-0.227692	0.434905	0.361606	109000000	94000000	0.872	0.752	-0.1976	-0.411195	4	FALSE	TRUE	TRUE	28	411	6.81265	Tnon_mito	Q14651	ENSG00000120756
PSMA5	Proteasome subunit alpha type-5 OS=Homo sapiens GN=PSMA5 PE=1 SV=3	9	9	51	290000000	290000000	170000000	200000000	150000000	160000000	290000000	170000000	0.586207	-0.770518	0.00156251	2.80618	155000000	175000000	0.534483	0.603448	-0.903785	-0.728698	4	TRUE	TRUE	TRUE	88	411	21.4112	Tnon_mito	PSC5|ZETA|P28066	ENSG00000143106
PSMB3	Proteasome subunit beta type-3 OS=Homo sapiens GN=PSMB3 PE=1 SV=2	5	5	25	130000000	63000000	55000000	66000000	53000000	56000000	96500000	57500000	0.595855	-0.746967	0.450762	0.346053	54500000	59500000	0.564767	0.61658	-0.824273	-0.697639	4	FALSE	TRUE	TRUE	68	411	16.545	Tnon_mito	HC10-II|P49720	ENSG00000108294
SRI	Sorcin OS=Homo sapiens GN=SRI PE=1 SV=1	1	1	4			24000000	31000000	20000000	27000000	0	25500000	100	6.64386	0.0016277	2.78842	23500000	25500000	100	100	6.64386	6.64386	4	TRUE	FALSE	FALSE	15	411	3.64964	Tnon_mito	CP-22|CP22|SCN|V19|P30626	ENSG00000075142
USP9X	Probable ubiquitin carboxyl-terminal hydrolase FAF-X OS=Homo sapiens GN=USP9X PE=1 SV=3	13	13	32	38000000	28000000	27000000	29000000	29000000	22000000	33000000	26750000	0.810606	-0.302927	0.416328	0.380564	25500000	29000000	0.772727	0.878788	-0.371969	-0.186413	4	FALSE	TRUE	TRUE	66	411	16.0584	Tnon_mito	DFFRX|FAF|FAM|RP5-1172N10.4|Q93008	ENSG00000124486
AKAP12	A-kinase anchor protein 12 OS=Homo sapiens GN=AKAP12 PE=1 SV=4	23	23	89	78000000	45000000	48000000	62000000	43000000	42000000	61500000	48750000	0.792683	-0.335184	0.578244	0.237889	42500000	52500000	0.691057	0.853659	-0.533124	-0.228269	4	FALSE	TRUE	TRUE	53	411	12.8954	Tnon_mito	AKAP250|SSeCKS|Q02952	ENSG00000131016
WDR1	WD repeat-containing protein 1 OS=Homo sapiens GN=WDR1 PE=1 SV=4	5	5	7	65000000	36000000		33000000			50500000	8250000	0.163366	-2.61382	0.148983	0.826863	0	16500000	0	0.326733		-1.61382	1	FALSE	TRUE	TRUE	24	411	5.83942	Tnon_mito	AIP1|HEL-S-52|NORI-1|O75083	ENSG00000071127
ERI3	ERI1 exoribonuclease 3 OS=Homo sapiens GN=ERI3 PE=1 SV=2	1	1	1	36000000						18000000	0	0		0.5	0.30103	0	0	0	0			0	FALSE	FALSE	FALSE	1	411	0.243309	Tnon_mito	PINT1|PRNPIP|O43414	ENSG00000117419
HMOX2	Heme oxygenase 2 OS=Homo sapiens GN=HMOX2 PE=1 SV=2	6	6	27	44000000	26000000	58000000	79000000	69000000	56000000	35000000	65500000	1.87143	0.90414	0.116659	0.933083	62500000	74000000	1.78571	2.11429	0.836501	1.08017	4	FALSE	TRUE	TRUE	3	411	0.729927	Tnon_mito	HO-2|P30519	ENSG00000103415
SMC1A	Structural maintenance of chromosomes protein 1A OS=Homo sapiens GN=SMC1A PE=1 SV=2	18	18	69	48000000	91000000	58000000	62000000	45000000	50000000	69500000	53750000	0.773381	-0.370748	0.596238	0.22458	47500000	53500000	0.683453	0.769784	-0.549085	-0.377474	4	FALSE	TRUE	TRUE	79	411	19.2214	Tnon_mito	CDLS2|DXS423E|SB1.8|SMC1|SMC1L1|SMC1alpha|SMCB|Q14683	ENSG00000072501
RPL10	60S ribosomal protein L10 OS=Homo sapiens GN=RPL10 PE=2 SV=1	1	6	32						14000000	0	3500000	100	6.64386	0.391002	0.407821	7000000	0	100	0	6.64386		1	FALSE	TRUE	TRUE	146	411	35.5231	Tnon_mito	AUTSX5|DXS648|DXS648E|L10|NOV|QM|P27635	ENSG00000147403
RPL10	60S ribosomal protein L10 OS=Homo sapiens GN=RPL10 PE=1 SV=4	1	6	57	600000000	810000000	660000000	910000000	340000000	370000000	705000000	570000000	0.808511	-0.306661	0.476498	0.321939	355000000	625000000	0.503546	0.886525	-0.989804	-0.173767	4	FALSE	TRUE	TRUE	146	411	35.5231	Tnon_mito	AUTSX5|DXS648|DXS648E|L10|NOV|QM|P27635	ENSG00000147403
RPL26	60S ribosomal protein L26 OS=Homo sapiens GN=RPL26 PE=1 SV=1	4	4	14	500000000	230000000	330000000	180000000	210000000	170000000	365000000	222500000	0.609589	-0.714091	0.475739	0.322631	190000000	195000000	0.520548	0.534247	-0.941897	-0.904422	4	FALSE	TRUE	TRUE	141	411	34.3066	Tnon_mito	DBA11|L26|P61254	ENSG00000161970
PSMB6	Proteasome subunit beta type-6 OS=Homo sapiens GN=PSMB6 PE=1 SV=4	3	3	22	190000000	160000000	140000000	200000000	110000000	150000000	175000000	150000000	0.857143	-0.222392	0.361785	0.44155	130000000	155000000	0.742857	0.885714	-0.428843	-0.175087	4	FALSE	TRUE	TRUE	76	411	18.4915	Tnon_mito	DELTA|LMPY|Y|P28072	ENSG00000142507
RPAP3	RNA polymerase II-associated protein 3 OS=Homo sapiens GN=RPAP3 PE=1 SV=2	5	5	12	32000000	28000000	20000000	23000000	16000000	14000000	30000000	18250000	0.608333	-0.717066	0.0252371	1.59796	15000000	19500000	0.5	0.65	-1	-0.621488	4	TRUE	TRUE	TRUE	36	411	8.75912	Tnon_mito	Q9H6T3	ENSG00000005175
NEK5	Serine/threonine-protein kinase Nek5 OS=Homo sapiens GN=NEK5 PE=1 SV=1	1	1	1						1400000000	0	350000000	100	6.64386	0.391002	0.407821	700000000	0	100	0	6.64386		1	FALSE	FALSE	FALSE	2	411	0.486618	Tnon_mito	Q6P3R8	ENSG00000197168
WARS	Tryptophan--tRNA ligase, cytoplasmic OS=Homo sapiens GN=WARS PE=1 SV=2	3	3	9	42000000	37000000	53000000	21000000	81000000	12000000	39500000	41750000	1.05696	0.0799235	0.896451	0.0474735	46500000	51000000	1.17722	1.29114	0.235378	0.368645	4	FALSE	TRUE	TRUE	107	411	26.0341	Tnon_mito	GAMMA-2|IFI53|IFP53|P23381	ENSG00000140105
SEC31A	Protein transport protein Sec31A OS=Homo sapiens GN=SEC31A PE=2 SV=1	5	5	14	34000000	27000000	15000000	16000000	11000000		30500000	10500000	0.344262	-1.53842	0.0267161	1.57323	5500000	13500000	0.180328	0.442623	-2.47131	-1.17585	3	TRUE	TRUE	TRUE	27	411	6.56934	Tnon_mito	ABP125|ABP130|HSPC334|SEC31L1|O94979	ENSG00000138674
PEX14	Peroxisomal membrane protein PEX14 OS=Homo sapiens GN=PEX14 PE=1 SV=1	1	1	1					18000000		0	4500000	100	6.64386	0.391002	0.407821	9000000	9000000	100	100	6.64386	6.64386	1	FALSE	FALSE	FALSE	29	411	7.05596	Tnon_mito	NAPP2|PBD13A|Pex14p|dJ734G22.2|O75381	ENSG00000142655
GFPT1	Glutamine--fructose-6-phosphate aminotransferase [isomerizing] 1 OS=Homo sapiens GN=GFPT1 PE=1 SV=3	2	2	3	27000000	24000000					25500000	0	0		0.0374051	1.42707	0	0	0	0			0	TRUE	FALSE	FALSE	15	411	3.64964	Tnon_mito	CMSTA1|GFA|GFAT|GFAT 1|GFAT1|GFAT1m|GFPT|GFPT1L|MSLG|Q06210	ENSG00000198380
EFTUD1	Elongation factor Tu GTP-binding domain-containing protein 1 OS=Homo sapiens GN=EFTUD1 PE=1 SV=2	1	1	2				12000000	9300000		0	5325000	100	6.64386	0.186764	0.728707	4650000	10650000	100	100	6.64386	6.64386	2	FALSE	FALSE	FALSE	6	411	1.45985	Tnon_mito	FAM42A|HsT19294|RIA1|Q7Z2Z2	ENSG00000140598
PGAM1	Phosphoglycerate mutase 1 OS=Homo sapiens GN=PGAM1 PE=1 SV=2	10	10	66	500000000	340000000	170000000	180000000	140000000	160000000	420000000	162500000	0.386905	-1.36995	0.188303	0.725143	150000000	160000000	0.357143	0.380952	-1.48543	-1.39232	4	FALSE	TRUE	TRUE	95	411	23.1144	Tnon_mito	HEL-S-35|PGAM-B|PGAMA|P18669	ENSG00000171314
PPIA	Peptidyl-prolyl cis-trans isomerase A OS=Homo sapiens GN=PPIA PE=1 SV=2	9	9	123	1800000000	770000000	620000000	520000000	270000000	360000000	1285000000	442500000	0.344358	-1.53802	0.34438	0.462962	315000000	395000000	0.245136	0.307393	-2.02834	-1.70184	4	FALSE	TRUE	TRUE	184	411	44.7689	Tnon_mito	CYPA|CYPH|HEL-S-69p|P62937	ENSG00000196262
RAB1A	Ras-related protein Rab-1A OS=Homo sapiens GN=RAB1A PE=1 SV=3	1	7	137			50000000				0	12500000	100	6.64386	0.391002	0.407821	0	0	0	0			1	FALSE	TRUE	TRUE	69	411	16.7883	Tnon_mito	RAB1|YPT1|P62820	ENSG00000138069
RAB2A	Ras-related protein Rab-2A OS=Homo sapiens GN=RAB2A PE=1 SV=1	8	8	34	58000000	37000000	56000000	74000000	57000000	67000000	47500000	63500000	1.33684	0.418829	0.345341	0.461752	62000000	65500000	1.30526	1.37895	0.384341	0.463567	4	FALSE	TRUE	TRUE	35	411	8.51582	Tnon_mito	LHX|RAB2|P61019	ENSG00000104388
RAB7A	Ras-related protein Rab-7a OS=Homo sapiens GN=RAB7A PE=1 SV=1	12	12	84	150000000	120000000	180000000	200000000	150000000	160000000	135000000	172500000	1.27778	0.353637	0.171749	0.765106	155000000	175000000	1.14815	1.2963	0.199309	0.374396	4	FALSE	TRUE	TRUE	63	411	15.3285	Tnon_mito	PRO2706|RAB7|P51149	ENSG00000075785
RAB14	Ras-related protein Rab-14 OS=Homo sapiens GN=RAB14 PE=1 SV=4	4	5	98	62000000		52000000	71000000	74000000	62000000	31000000	64750000	2.08871	1.06261	0.470001	0.327901	68000000	72500000	2.19355	2.33871	1.13327	1.22571	4	FALSE	TRUE	TRUE	40	411	9.73236	Tnon_mito	FBP|RAB-14|P61106	ENSG00000119396
PGK1	Phosphoglycerate kinase 1 OS=Homo sapiens GN=PGK1 PE=1 SV=3	12	12	85	440000000	300000000	130000000	180000000	150000000	150000000	370000000	152500000	0.412162	-1.27872	0.191764	0.717233	150000000	165000000	0.405405	0.445946	-1.30256	-1.16506	4	FALSE	TRUE	TRUE	86	411	20.9246	Tnon_mito	HEL-S-68p|MIG10|PGKA|P00558	ENSG00000102144
RPS6KA2	Ribosomal protein S6 kinase OS=Homo sapiens GN=RPS6KA2 PE=2 SV=1	1	1	2	7800000	6700000					7250000	0	0		0.048203	1.31693	0	0	0	0			0	TRUE	FALSE	FALSE	3	411	0.729927	Tnon_mito	HU-2|MAPKAPK1C|RSK|RSK3|S6K-alpha|S6K-alpha2|p90-RSK3|pp90RSK3|Q15349	ENSG00000071242
PES1	Pescadillo homolog OS=Homo sapiens GN=PES1 PE=1 SV=1	1	1	2	39000000	32000000					35500000	0	0		0.0625631	1.20368	0	0	0	0			0	FALSE	FALSE	FALSE	57	411	13.8686	Tnon_mito	PES|O00541	ENSG00000100029
CDC42EP4	Cdc42 effector protein 4 OS=Homo sapiens GN=CDC42EP4 PE=1 SV=1	1	1	1				1900000			0	475000	100	6.64386	0.391002	0.407821	0	950000	0	100		6.64386	1	FALSE	FALSE	FALSE	2	411	0.486618	Tnon_mito	BORG4|CEP4|KAIA1777|Q9H3Q1	ENSG00000179604
ARHGAP22	Isoform 2 of Rho GTPase-activating protein 22 OS=Homo sapiens GN=ARHGAP22	1	1	2			18000000	21000000			0	9750000	100	6.64386	0.183568	0.736203	0	10500000	0	100		6.64386	2	FALSE	FALSE	FALSE	1	411	0.243309	Tnon_mito	RhoGAP2|RhoGap22|Q7Z5H3	ENSG00000128805
PRMT3	Protein arginine N-methyltransferase 3 OS=Homo sapiens GN=PRMT3 PE=1 SV=3	1	1	1		12000000					6000000	0	0		0.5	0.30103	0	0	0	0			0	FALSE	FALSE	FALSE	7	411	1.70316	Tnon_mito	HRMT1L3|O60678	ENSG00000185238
TUBB2B	Tubulin beta-2B chain OS=Homo sapiens GN=TUBB2B PE=1 SV=1	1	23	533	120000000	89000000	57000000	59000000	46000000	48000000	104500000	52500000	0.502392	-0.993114	0.171814	0.764941	47000000	52500000	0.449761	0.502392	-1.15277	-0.993114	4	FALSE	TRUE	TRUE	372	411	90.5109	Tnon_mito	PMGYSA|bA506K6.1|Q9BVA1	ENSG00000137285
RHOA	Transforming protein RhoA OS=Homo sapiens GN=RHOA PE=1 SV=1	7	7	31	110000000	75000000	73000000	100000000	75000000	81000000	92500000	82250000	0.889189	-0.169438	0.662684	0.178693	78000000	87500000	0.843243	0.945946	-0.245979	-0.0801703	4	FALSE	TRUE	TRUE	45	411	10.9489	Tpossible_mito	ARH12|ARHA|RHO12|RHOH12|P61586	ENSG00000067560
RAB8A	Ras-related protein Rab-8A OS=Homo sapiens GN=RAB8A PE=1 SV=1	2	4	96		21000000	11000000	40000000		61000000	10500000	28000000	2.66667	1.41504	0.374883	0.426105	30500000	20000000	2.90476	1.90476	1.53842	0.929611	3	FALSE	TRUE	TRUE	49	411	11.9221	Tnon_mito	MEL|RAB8|P61006	ENSG00000167461
POR	NADPH--cytochrome P450 reductase (Fragment) OS=Homo sapiens GN=POR PE=4 SV=1	5	5	12	15000000	21000000	33000000	28000000	26000000	32000000	18000000	29750000	1.65278	0.724893	0.0983628	1.00717	29000000	27000000	1.61111	1.5	0.688056	0.584963	4	FALSE	TRUE	TRUE	16	411	3.89294	Tpossible_mito	CPR|CYPOR|P450R|P16435	ENSG00000127948
RAB3A	Ras-related protein Rab-3A OS=Homo sapiens GN=RAB3A PE=1 SV=1	1	2	86				16000000	15000000		0	7750000	100	6.64386	0.182021	0.739878	7500000	15500000	100	100	6.64386	6.64386	2	FALSE	FALSE	TRUE	30	411	7.29927	Tnon_mito	P20336	ENSG00000105649
RAB5C	Isoform 2 of Ras-related protein Rab-5C OS=Homo sapiens GN=RAB5C	7	7	35	56000000	61000000	69000000	71000000	78000000	75000000	58500000	73250000	1.25214	0.324392	0.0313566	1.50367	76500000	74500000	1.30769	1.2735	0.387023	0.348804	4	TRUE	TRUE	TRUE	61	411	14.8418	Tnon_mito	L1880|RAB5CL|RAB5L|RABL|P51148	ENSG00000108774
RAB11B	Ras-related protein Rab-11B OS=Homo sapiens GN=RAB11B PE=1 SV=4	9	9	31	200000000	98000000	140000000	180000000	130000000	130000000	149000000	145000000	0.973154	-0.0392594	0.950505	0.0220455	130000000	155000000	0.872483	1.04027	-0.196801	0.0569559	4	FALSE	TRUE	TRUE	47	411	11.4355	Tpossible_mito	H-YPT3|Q15907	ENSG00000185236
RAB10	Ras-related protein Rab-10 OS=Homo sapiens GN=RAB10 PE=1 SV=1	4	6	117	79000000	81000000	130000000	150000000	68000000	110000000	80000000	114500000	1.43125	0.517276	0.143403	0.843442	89000000	109000000	1.1125	1.3625	0.153805	0.446256	4	FALSE	TRUE	TRUE	56	411	13.6253	Tnon_mito	P61026	ENSG00000084733
CCT6A	T-complex protein 1 subunit zeta OS=Homo sapiens GN=CCT6A PE=1 SV=3	20	20	146	440000000	350000000	260000000	350000000	260000000	270000000	395000000	285000000	0.721519	-0.470891	0.199939	0.699102	265000000	305000000	0.670886	0.772152	-0.57586	-0.373043	4	FALSE	TRUE	TRUE	177	411	43.0657	Tnon_mito	CCT-zeta|CCT-zeta-1|CCT6|Cctz|HTR3|MoDP-2|TCP-1-zeta|TCP20|TCPZ|TTCP20|P40227	ENSG00000146731
PGM1	Phosphoglucomutase-1 OS=Homo sapiens GN=PGM1 PE=1 SV=3	3	3	9	23000000	24000000	13000000	13000000	6200000	8100000	23500000	10075000	0.428723	-1.22188	0.00305869	2.51446	7150000	9600000	0.304255	0.408511	-1.71665	-1.29155	4	TRUE	TRUE	TRUE	16	411	3.89294	Tnon_mito	CDG1T|GSD14|P36871	ENSG00000079739
NUP37	Nucleoporin Nup37 OS=Homo sapiens GN=NUP37 PE=1 SV=1	1	1	4	20000000			13000000	11000000	12000000	10000000	9000000	0.9	-0.152003	0.937299	0.0281217	11500000	12000000	1.15	1.2	0.201634	0.263034	3	FALSE	FALSE	FALSE	8	411	1.94647	Tnon_mito	p37|Q8NFH4	ENSG00000075188
PSMB4	Proteasome subunit beta type-4 OS=Homo sapiens GN=PSMB4 PE=1 SV=4	5	5	24	57000000	52000000	40000000	43000000	57000000	65000000	54500000	51250000	0.940367	-0.0887042	0.63966	0.194051	61000000	50000000	1.11927	0.917431	0.162553	-0.124328	4	FALSE	TRUE	TRUE	68	411	16.545	Tnon_mito	HN3|HsN3|PROS-26|PROS26|P28070	ENSG00000159377
POLR2A	DNA-directed RNA polymerase II subunit RPB1 OS=Homo sapiens GN=POLR2A PE=1 SV=2	1	1	1		4600000					2300000	0	0		0.5	0.30103	0	0	0	0			0	FALSE	FALSE	FALSE	50	411	12.1655	Tnon_mito	POLR2|POLRA|RPB1|RPBh1|RPO2|RPOL2|RpIILS|hRPB220|hsRPB1|P24928	ENSG00000181222
RPL31	60S ribosomal protein L31 OS=Homo sapiens GN=RPL31 PE=1 SV=1	3	3	38	610000000	510000000	610000000	790000000	690000000	690000000	560000000	695000000	1.24107	0.311586	0.151866	0.81854	690000000	740000000	1.23214	1.32143	0.30117	0.402098	4	FALSE	TRUE	TRUE	170	411	41.3625	Tnon_mito	L31|P62899	ENSG00000071082
SNX3	Sorting nexin-3 OS=Homo sapiens GN=SNX3 PE=1 SV=3	1	1	1	25000000						12500000	0	0		0.5	0.30103	0	0	0	0			0	FALSE	FALSE	FALSE	11	411	2.6764	Tnon_mito	Grd19|MCOPS8|SDP3|O60493	ENSG00000112335
CFTR	Cystic fibrosis transmembrane conductance regulator OS=Homo sapiens GN=CFTR PE=1 SV=3	1	1	2			16000000	24000000			0	10000000	100	6.64386	0.194171	0.711815	0	12000000	0	100		6.64386	2	FALSE	FALSE	FALSE	0	411	0	Tnon_mito	ABC35|ABCC7|CF|CFTR/MRP|MRP7|TNR-CFTR|dJ760C5.1|P13569	ENSG00000001626
NUBP2	Cytosolic Fe-S cluster assembly factor NUBP2 OS=Homo sapiens GN=NUBP2 PE=1 SV=1	2	2	3	25000000	22000000					23500000	0	0		0.0405803	1.39169	0	0	0	0			0	TRUE	FALSE	FALSE	9	411	2.18978	Tnon_mito	CFD1|NBP 2|NUBP1|Q9Y5Y2	ENSG00000095906
GCN1L1	Translational activator GCN1 OS=Homo sapiens GN=GCN1L1 PE=1 SV=6	51	51	202	85000000	120000000	78000000	160000000	110000000	76000000	102500000	106000000	1.03415	0.0484404	0.901706	0.0449351	93000000	135000000	0.907317	1.31707	-0.140321	0.397335	4	FALSE	TRUE	TRUE	104	411	25.3041	Tnon_mito	GCN1|GCN1L|PRIC295|Q92616	ENSG00000089154
COMT	Catechol O-methyltransferase OS=Homo sapiens GN=COMT PE=1 SV=2	8	8	44	48000000	120000000	130000000	140000000	140000000	65000000	84000000	118750000	1.41369	0.499466	0.501901	0.299382	102500000	140000000	1.22024	1.66667	0.287163	0.736966	4	FALSE	TRUE	TRUE	12	411	2.91971	Tmito	HEL-S-98n|P21964	ENSG00000093010
PGLS	6-phosphogluconolactonase OS=Homo sapiens GN=PGLS PE=1 SV=2	1	1	2	25000000	22000000					23500000	0	0		0.0405803	1.39169	0	0	0	0			0	TRUE	FALSE	FALSE	11	411	2.6764	Tnon_mito	6PGL|O95336	ENSG00000130313
HECTD1	E3 ubiquitin-protein ligase HECTD1 OS=Homo sapiens GN=HECTD1 PE=1 SV=3	2	2	3	18000000	14000000			7200000		16000000	1800000	0.1125	-3.152	0.0173954	1.75957	3600000	3600000	0.225	0.225	-2.152	-2.152	1	TRUE	FALSE	FALSE	5	411	1.21655	Tnon_mito	Q9ULT8	ENSG00000092148
NSUN5	Isoform 4 of Putative methyltransferase NSUN5 OS=Homo sapiens GN=NSUN5	1	1	1		8300000					4150000	0	0		0.5	0.30103	0	0	0	0			0	FALSE	FALSE	FALSE	9	411	2.18978	Tnon_mito	NOL1|NOL1R|NSUN5A|WBSCR20|WBSCR20A|p120|Q96P11	ENSG00000130305
DDX5	Probable ATP-dependent RNA helicase DDX5 OS=Homo sapiens GN=DDX5 PE=2 SV=1	12	19	122	230000000	200000000	160000000	300000000	260000000	160000000	215000000	220000000	1.02326	0.0331669	0.903554	0.044046	210000000	280000000	0.976744	1.30233	-0.0339473	0.38109	4	FALSE	TRUE	TRUE	247	411	60.0973	Tnon_mito	G17P1|HLR1|HUMP68|p68|P17844	ENSG00000108654
DDX17	Probable ATP-dependent RNA helicase DDX17 OS=Homo sapiens GN=DDX17 PE=2 SV=1	13	20	124	160000000	100000000	110000000	120000000	160000000	110000000	130000000	125000000	0.961538	-0.0565835	0.897059	0.0471791	135000000	140000000	1.03846	1.07692	0.0544478	0.106915	4	FALSE	TRUE	TRUE	238	411	57.9075	Tnon_mito	P72|RH70|Q92841	ENSG00000100201
DDX42	ATP-dependent RNA helicase DDX42 OS=Homo sapiens GN=DDX42 PE=1 SV=1	7	7	20	23000000	28000000	33000000	61000000	33000000	22000000	25500000	37250000	1.46078	0.546743	0.257843	0.588644	27500000	47000000	1.07843	1.84314	0.108934	0.882164	4	FALSE	TRUE	TRUE	61	411	14.8418	Tnon_mito	DDX42P|RHELP|RNAHP|SF3b125|Q86XP3	ENSG00000198231
DNAJC9	DnaJ homolog subfamily C member 9 OS=Homo sapiens GN=DNAJC9 PE=1 SV=1	7	7	21	51000000	43000000	18000000	18000000	18000000	17000000	47000000	17750000	0.37766	-1.40484	0.0854735	1.06817	17500000	18000000	0.37234	0.382979	-1.42531	-1.38466	4	FALSE	TRUE	TRUE	25	411	6.08273	Tnon_mito	HDJC9|JDD1|SB73|Q8WXX5	ENSG00000213551
DNAJC27	DnaJ homolog subfamily C member 27 OS=Homo sapiens GN=DNAJC27 PE=1 SV=1	1	1	6		200000000	150000000	160000000	170000000		100000000	120000000	1.2	0.263034	0.876928	0.057036	85000000	165000000	0.85	1.65	-0.234465	0.722466	3	FALSE	FALSE	TRUE	0	411	0	Tpossible_mito	RBJ|RabJS|Q9NZQ0	ENSG00000115137
RPL3	60S ribosomal protein L3 OS=Homo sapiens GN=RPL3 PE=1 SV=2	13	13	156	460000000	550000000	610000000	710000000	530000000	560000000	505000000	602500000	1.19307	0.254678	0.214949	0.667664	545000000	620000000	1.07921	1.22772	0.109973	0.295985	4	FALSE	TRUE	TRUE	163	411	39.6594	Tnon_mito	ASC-1|L3|TARBP-B|P39023	ENSG00000100316
CORO1A	Coronin-1A OS=Homo sapiens GN=CORO1A PE=1 SV=4	1	1	1					4500000		0	1125000	100	6.64386	0.391002	0.407821	2250000	2250000	100	100	6.64386	6.64386	1	FALSE	FALSE	FALSE	7	411	1.70316	Tnon_mito	CLABP|CLIPINA|HCORO1|IMD8|TACO|p57|P31146	ENSG00000102879
CASP7	Isoform Alpha' of Caspase-7 OS=Homo sapiens GN=CASP7	1	1	1		9400000					4700000	0	0		0.5	0.30103	0	0	0	0			0	FALSE	FALSE	FALSE	5	411	1.21655	Tnon_mito	CASP-7|CMH-1|ICE-LAP3|LICE2|MCH3|P55210	ENSG00000165806
CORO1C	Isoform 3 of Coronin-1C OS=Homo sapiens GN=CORO1C	5	5	16	49000000	43000000	34000000	36000000	44000000	44000000	46000000	39500000	0.858696	-0.219781	0.214949	0.667664	44000000	40000000	0.956522	0.869565	-0.0641303	-0.201634	4	FALSE	TRUE	TRUE	100	411	24.3309	Tnon_mito	HCRNN4|Q9ULV4	ENSG00000110880
LAMTOR3	Ragulator complex protein LAMTOR3 OS=Homo sapiens GN=LAMTOR3 PE=1 SV=1	1	1	2	31000000	32000000					31500000	0	0		0.0101042	1.9955	0	0	0	0			0	TRUE	FALSE	FALSE	2	411	0.486618	Tnon_mito	MAP2K1IP1|MAPBP|MAPKSP1|MP1|PRO0633|Ragulator3|Q9UHA4	ENSG00000109270
DHX36	ATP-dependent RNA helicase DHX36 OS=Homo sapiens GN=DHX36 PE=1 SV=2	5	5	11	12000000	13000000	17000000	25000000	10000000	12000000	12500000	16000000	1.28	0.356144	0.373547	0.427655	11000000	17500000	0.88	1.4	-0.184425	0.485427	4	FALSE	TRUE	TRUE	23	411	5.59611	Tnon_mito	DDX36|G4R1|MLEL1|RHAU|Q9H2U1	ENSG00000174953
NCDN	Isoform 3 of Neurochondrin OS=Homo sapiens GN=NCDN	1	1	3	24000000			17000000		18000000	12000000	8750000	0.729167	-0.455679	0.835082	0.0782706	9000000	8500000	0.75	0.708333	-0.415037	-0.4975	2	FALSE	FALSE	FALSE	1	411	0.243309	Tnon_mito	Q9UBB6	ENSG00000020129
GNAI3	Guanine nucleotide-binding protein G(k) subunit alpha OS=Homo sapiens GN=GNAI3 PE=1 SV=3	5	5	18	22000000	27000000	30000000	37000000	35000000	63000000	24500000	41250000	1.68367	0.751612	0.106492	0.972684	49000000	36000000	2	1.46939	1	0.555215	4	FALSE	TRUE	TRUE	53	411	12.8954	Tnon_mito	87U6|ARCND1|P08754	ENSG00000065135
FKBP1A	Peptidyl-prolyl cis-trans isomerase FKBP1A OS=Homo sapiens GN=FKBP1A PE=1 SV=2	3	3	15	120000000	90000000	71000000	86000000	61000000	65000000	105000000	70750000	0.67381	-0.569587	0.232455	0.633662	63000000	73500000	0.6	0.7	-0.736966	-0.514573	4	FALSE	TRUE	TRUE	13	411	3.16302	Tnon_mito	FKBP-12|FKBP-1A|FKBP1|FKBP12|PKC12|PKCI2|PPIASE|P62942	ENSG00000088832
MAPK1	Mitogen-activated protein kinase 1 OS=Homo sapiens GN=MAPK1 PE=1 SV=3	3	3	4	18000000			25000000			9000000	6250000	0.694444	-0.526069	0.824867	0.0836161	0	12500000	0	1.38889		0.473931	1	FALSE	TRUE	FALSE	15	411	3.64964	Tpossible_mito	ERK|ERK-2|ERK2|ERT1|MAPK2|P42MAPK|PRKM1|PRKM2|p38|p40|p41|p41mapk|p42-MAPK|P28482	ENSG00000100030
EIF4H	Eukaryotic translation initiation factor 4H OS=Homo sapiens GN=EIF4H PE=1 SV=5	7	7	47	220000000	150000000	100000000	130000000	100000000	120000000	185000000	112500000	0.608108	-0.7176	0.275003	0.560662	110000000	115000000	0.594595	0.621622	-0.750022	-0.685891	4	FALSE	TRUE	TRUE	90	411	21.8978	Tnon_mito	WBSCR1|WSCR1|eIF-4H|Q15056	ENSG00000106682
RANBP1	Ran-specific GTPase-activating protein OS=Homo sapiens GN=RANBP1 PE=1 SV=1	5	5	45	280000000	660000000	220000000	300000000	400000000	240000000	470000000	290000000	0.617021	-0.696608	0.513543	0.289423	320000000	350000000	0.680851	0.744681	-0.554589	-0.425306	4	FALSE	TRUE	TRUE	90	411	21.8978	Tnon_mito	HTF9A|P43487	ENSG00000099901
MAGT1	Magnesium transporter protein 1 OS=Homo sapiens GN=MAGT1 PE=1 SV=1	2	2	2	16000000	120000000					68000000	0	0		0.415615	0.381309	0	0	0	0			0	FALSE	FALSE	FALSE	7	411	1.70316	Tnon_mito	IAP|MRX95|OST3B|PRO0756|XMEN|bA217H1.1|Q9H0U3	ENSG00000102158
TTN	Isoform 12 of Titin OS=Homo sapiens GN=TTN	2	2	2		29000000			27000000		14500000	6750000	0.465517	-1.10309	0.690783	0.160659	13500000	13500000	0.931034	0.931034	-0.103093	-0.103093	1	FALSE	FALSE	FALSE	15	411	3.64964	Tnon_mito	CMD1G|CMH9|CMPD4|EOMFC|HMERF|LGMD2J|MYLK5|TMD|Q8WZ42	ENSG00000155657
MOGS	Mannosyl-oligosaccharide glucosidase OS=Homo sapiens GN=MOGS PE=1 SV=5	8	8	24	52000000	69000000	67000000	97000000	58000000	62000000	60500000	71000000	1.17355	0.230884	0.453027	0.343876	60000000	77500000	0.991736	1.28099	-0.0119726	0.357261	4	FALSE	TRUE	TRUE	15	411	3.64964	Tnon_mito	CDG2B|CWH41|DER7|GCS1|Q13724	ENSG00000115275
EIF4G1	Isoform 9 of Eukaryotic translation initiation factor 4 gamma 1 OS=Homo sapiens GN=EIF4G1	27	31	197	230000000	170000000	170000000	200000000	160000000	200000000	200000000	182500000	0.9125	-0.132104	0.663763	0.177987	180000000	180000000	0.9	0.9	-0.152003	-0.152003	4	FALSE	TRUE	TRUE	102	411	24.8175	Tnon_mito	EIF-4G1|EIF4F|EIF4G|EIF4GI|P220|PARK18|Q04637	ENSG00000114867
DYNLRB1	Dynein light chain roadblock-type 1 OS=Homo sapiens GN=DYNLRB1 PE=2 SV=1	4	4	21	98000000	81000000	46000000	75000000	71000000	66000000	89500000	64500000	0.72067	-0.472589	0.130562	0.884184	68500000	73000000	0.765363	0.815642	-0.385784	-0.293991	4	FALSE	TRUE	TRUE	35	411	8.51582	Tnon_mito	BITH|BLP|DNCL2A|DNLC2A|ROBLD1|Q9NP97	ENSG00000125971
ANK3	Ankyrin-3 OS=Homo sapiens GN=ANK3 PE=1 SV=3	1	1	2	14000000	12000000					13000000	0	0		0.0488745	1.31092	0	0	0	0			0	TRUE	FALSE	FALSE	15	411	3.64964	Tnon_mito	ANKYRIN-G|MRT37|Q12955	ENSG00000151150
DDX3X	ATP-dependent RNA helicase DDX3X OS=Homo sapiens GN=DDX3X PE=1 SV=3	19	20	112	180000000	170000000	150000000	180000000	170000000	140000000	175000000	160000000	0.914286	-0.129283	0.223118	0.651466	155000000	175000000	0.885714	1	-0.175087	0	4	FALSE	TRUE	TRUE	212	411	51.5815	Tpossible_mito	DBX|DDX14|DDX3|HLP2|O00571	ENSG00000215301
EIF4A1	Eukaryotic initiation factor 4A-I OS=Homo sapiens GN=EIF4A1 PE=1 SV=1	7	23	187	300000000	240000000	200000000	250000000	180000000	190000000	270000000	205000000	0.759259	-0.397335	0.227715	0.642609	185000000	215000000	0.685185	0.796296	-0.545434	-0.328623	4	FALSE	TRUE	TRUE	190	411	46.2287	Tnon_mito	DDX2A|EIF-4A|EIF4A|eIF-4A-I|eIF4A-I|P60842	ENSG00000161960
EIF4A1	Eukaryotic initiation factor 4A-I (Fragment) OS=Homo sapiens GN=EIF4A1 PE=3 SV=1	2	14	84	160000000	61000000	81000000	67000000	95000000	82000000	110500000	81250000	0.735294	-0.443607	0.660001	0.180456	88500000	81000000	0.800905	0.733032	-0.320297	-0.448053	4	FALSE	TRUE	TRUE	190	411	46.2287	Tnon_mito	DDX2A|EIF-4A|EIF4A|eIF-4A-I|eIF4A-I|P60842	ENSG00000161960
EIF4A1	Eukaryotic initiation factor 4A-I (Fragment) OS=Homo sapiens GN=EIF4A1 PE=2 SV=1	1	3	41	39000000	72000000	36000000	36000000	15000000	30000000	55500000	29250000	0.527027	-0.924051	0.340996	0.467251	22500000	25500000	0.405405	0.459459	-1.30256	-1.12199	4	FALSE	TRUE	TRUE	190	411	46.2287	Tnon_mito	DDX2A|EIF-4A|EIF4A|eIF-4A-I|eIF4A-I|P60842	ENSG00000161960
ACSL3	Long-chain-fatty-acid--CoA ligase 3 OS=Homo sapiens GN=ACSL3 PE=1 SV=3	11	13	63	71000000	51000000	73000000	97000000	66000000	67000000	61000000	75750000	1.2418	0.312437	0.348367	0.457964	66500000	81500000	1.09016	1.33607	0.124545	0.417991	4	FALSE	TRUE	TRUE	48	411	11.6788	Tpossible_mito	ACS3|FACL3|PRO2194|O95573	ENSG00000123983
ACSL4	Long-chain-fatty-acid--CoA ligase 4 OS=Homo sapiens GN=ACSL4 PE=1 SV=2	10	12	62	74000000	53000000	77000000	110000000	69000000	67000000	63500000	80750000	1.27165	0.346706	0.323526	0.490091	68000000	89500000	1.07087	1.40945	0.0987782	0.495131	4	FALSE	TRUE	TRUE	39	411	9.48905	Tmito	ACS4|FACL4|LACS4|MRX63|MRX68|O60488	ENSG00000068366
FARSA	Phenylalanine--tRNA ligase alpha subunit (Fragment) OS=Homo sapiens GN=FARSA PE=3 SV=2	1	5	9				57000000			0	14250000	100	6.64386	0.391002	0.407821	0	28500000	0	100		6.64386	1	FALSE	TRUE	TRUE	60	411	14.5985	Tnon_mito	CML33|FARSL|FARSLA|FRSA|PheHA|Q9Y285	ENSG00000179115
FARSA	Phenylalanine--tRNA ligase alpha subunit OS=Homo sapiens GN=FARSA PE=1 SV=3	6	10	52	120000000	110000000	81000000	110000000	54000000	86000000	115000000	82750000	0.719565	-0.474803	0.0643326	1.19157	70000000	82000000	0.608696	0.713043	-0.716207	-0.487938	4	FALSE	TRUE	TRUE	60	411	14.5985	Tnon_mito	CML33|FARSL|FARSLA|FRSA|PheHA|Q9Y285	ENSG00000179115
ANKRD17	Ankyrin repeat domain-containing protein 17 OS=Homo sapiens GN=ANKRD17 PE=1 SV=3	1	4	8			18000000				0	4500000	100	6.64386	0.391002	0.407821	0	0	0	0			1	FALSE	TRUE	TRUE	39	411	9.48905	Tnon_mito	GTAR|NY-BR-16|O75179	ENSG00000132466
HSD17B11	Estradiol 17-beta-dehydrogenase 11 OS=Homo sapiens GN=HSD17B11 PE=1 SV=3	1	1	1		25000000					12500000	0	0		0.5	0.30103	0	0	0	0			0	FALSE	FALSE	FALSE	0	411	0	Tnon_mito	17BHSD11|DHRS8|PAN1B|RETSDR2|SDR16C2|Q8NBQ5	ENSG00000198189
SEPT11	Septin-11 OS=Homo sapiens GN=SEPT11 PE=2 SV=1	8	14	92	150000000	100000000	150000000	160000000	120000000	120000000	125000000	137500000	1.1	0.137504	0.707148	0.15049	120000000	140000000	0.96	1.12	-0.0588937	0.163499	4	FALSE	TRUE	TRUE	60	411	14.5985	Tnon_mito	Q9NVA2	ENSG00000138758
MKI67	Antigen KI-67 OS=Homo sapiens GN=MKI67 PE=1 SV=2	3	3	3			5800000	7600000			0	3350000	100	6.64386	0.187382	0.727272	0	3800000	0	100		6.64386	2	FALSE	TRUE	FALSE	80	411	19.4647	Tnon_mito	KIA|MIB-1|P46013	ENSG00000148773
WDR11	WD repeat-containing protein 11 OS=Homo sapiens GN=WDR11 PE=1 SV=1	4	4	9	21000000	26000000	26000000			20000000	23500000	11500000	0.489362	-1.03103	0.177224	0.751477	10000000	0	0.425532	0	-1.23266		2	FALSE	TRUE	TRUE	16	411	3.89294	Tnon_mito	BRWD2|DR11|HH14|WDR15|Q9BZH6	ENSG00000120008
RBM15	Putative RNA-binding protein 15 OS=Homo sapiens GN=RBM15 PE=1 SV=2	1	1	1				9300000			0	2325000	100	6.64386	0.391002	0.407821	0	4650000	0	100		6.64386	1	FALSE	FALSE	FALSE	40	411	9.73236	Tnon_mito	OTT|OTT1|SPEN|Q96T37	ENSG00000162775
KIAA1143	Uncharacterized protein KIAA1143 OS=Homo sapiens GN=KIAA1143 PE=1 SV=2	1	1	1			69000000				0	17250000	100	6.64386	0.391002	0.407821	0	0	0	0			1	FALSE	FALSE	FALSE	10	411	2.43309	Tnon_mito	Q96AT1	ENSG00000163807
WFS1	Wolframin OS=Homo sapiens GN=WFS1 PE=1 SV=2	2	2	3					6000000	14000000	0	5000000	100	6.64386	0.228778	0.640586	10000000	3000000	100	100	6.64386	6.64386	2	FALSE	FALSE	FALSE	0	411	0	Tpossible_mito	CTRCT41|WFRS|WFS|WFSL|O76024	ENSG00000109501
TMEM192	Transmembrane protein 192 OS=Homo sapiens GN=TMEM192 PE=1 SV=1	2	2	3			20000000			24000000	0	11000000	100	6.64386	0.18431	0.734451	12000000	0	100	0	6.64386		2	FALSE	FALSE	FALSE	0	411	0	Tnon_mito	Q8IY95	ENSG00000170088
ULK1	Serine/threonine-protein kinase ULK1 OS=Homo sapiens GN=ULK1 PE=1 SV=2	1	1	1			7200000				0	1800000	100	6.64386	0.391002	0.407821	0	0	0	0			1	FALSE	FALSE	FALSE	0	411	0	Tnon_mito	ATG1|ATG1A|UNC51|Unc51.1|hATG1|O75385	ENSG00000177169
FBXO3	F-box only protein 3 OS=Homo sapiens GN=FBXO3 PE=1 SV=3	1	1	1					26000000		0	6500000	100	6.64386	0.391002	0.407821	13000000	13000000	100	100	6.64386	6.64386	1	FALSE	FALSE	FALSE	4	411	0.973236	Tnon_mito	FBA|FBX3|Q9UK99	ENSG00000110429
PRPF19	Pre-mRNA-processing factor 19 OS=Homo sapiens GN=PRPF19 PE=1 SV=1	14	14	78	300000000	280000000	150000000	310000000	290000000	210000000	290000000	240000000	0.827586	-0.273018	0.273007	0.563826	250000000	300000000	0.862069	1.03448	-0.214125	0.0489096	4	FALSE	TRUE	TRUE	121	411	29.4404	Tnon_mito	NMP200|PRP19|PSO4|SNEV|UBOX4|hPSO4|Q9UMS4	ENSG00000110107
UBQLN1	Ubiquilin-1 OS=Homo sapiens GN=UBQLN1 PE=1 SV=2	1	3	13		44000000	52000000				22000000	13000000	0.590909	-0.758992	0.762525	0.117746	0	0	0	0			1	FALSE	TRUE	TRUE	10	411	2.43309	Tnon_mito	DA41|DSK2|PLIC-1|UBQN|XDRP1|Q9UMX0	ENSG00000135018
WDR18	WD repeat-containing protein 18 OS=Homo sapiens GN=WDR18 PE=1 SV=2	2	2	4	32000000	25000000	18000000		16000000		28500000	8500000	0.298246	-1.74543	0.0313896	1.50321	8000000	8000000	0.280702	0.280702	-1.83289	-1.83289	2	TRUE	FALSE	FALSE	52	411	12.6521	Tnon_mito	Ipi3|R32184_1|Q9BV38	ENSG00000065268
AACS	Acetoacetyl-CoA synthetase OS=Homo sapiens GN=AACS PE=1 SV=1	1	1	1					27000000		0	6750000	100	6.64386	0.391002	0.407821	13500000	13500000	100	100	6.64386	6.64386	1	FALSE	FALSE	FALSE	1	411	0.243309	Tnon_mito	ACSF1|SUR-5|Q86V21	ENSG00000081760
WDR92	WD repeat-containing protein 92 OS=Homo sapiens GN=WDR92 PE=1 SV=1	1	1	1				21000000			0	5250000	100	6.64386	0.391002	0.407821	0	10500000	0	100		6.64386	1	FALSE	FALSE	FALSE	4	411	0.973236	Tnon_mito	Q96MX6	ENSG00000243667
PEF1	Peflin OS=Homo sapiens GN=PEF1 PE=1 SV=1	1	1	2	17000000				11000000		8500000	2750000	0.323529	-1.62803	0.619713	0.207809	5500000	5500000	0.647059	0.647059	-0.628031	-0.628031	1	FALSE	FALSE	FALSE	19	411	4.62287	Tnon_mito	ABP32|PEF1A|Q9UBV8	ENSG00000162517
EIF3B	Eukaryotic translation initiation factor 3 subunit B OS=Homo sapiens GN=EIF3B PE=1 SV=3	31	31	159	320000000	230000000	200000000	240000000	220000000	230000000	275000000	222500000	0.809091	-0.305626	0.446485	0.350193	225000000	230000000	0.818182	0.836364	-0.289507	-0.257798	4	FALSE	TRUE	TRUE	108	411	26.2774	Tnon_mito	EIF3-ETA|EIF3-P110|EIF3-P116|EIF3S9|PRT1|P55884	ENSG00000106263
TRAPPC5	Trafficking protein particle complex subunit 5 OS=Homo sapiens GN=TRAPPC5 PE=1 SV=1	1	1	1	8400000						4200000	0	0		0.5	0.30103	0	0	0	0			0	FALSE	FALSE	FALSE	6	411	1.45985	Tnon_mito	TRS31|Q8IUR0	ENSG00000181029
CRK	Adapter molecule crk OS=Homo sapiens GN=CRK PE=1 SV=2	2	2	2	76000000	12000000					44000000	0	0		0.400304	0.39761	0	0	0	0			0	FALSE	FALSE	FALSE	24	411	5.83942	Tnon_mito	CRKII|p38|P46108	ENSG00000167193
DHX9	ATP-dependent RNA helicase A OS=Homo sapiens GN=DHX9 PE=1 SV=4	33	33	204	270000000	230000000	180000000	260000000	240000000	200000000	250000000	220000000	0.88	-0.184425	0.355927	0.44864	220000000	250000000	0.88	1	-0.184425	0	4	FALSE	TRUE	TRUE	205	411	49.8783	Tnon_mito	DDX9|LKP|NDH2|NDHII|RHA|Q08211	ENSG00000135829
RAB13	Ras-related protein Rab-13 OS=Homo sapiens GN=RAB13 PE=1 SV=1	1	2	6	36000000	24000000		44000000			30000000	11000000	0.366667	-1.44746	0.204177	0.689994	0	22000000	0	0.733333		-0.447459	1	FALSE	FALSE	TRUE	38	411	9.24574	Tnon_mito	P51153	ENSG00000143545
RANBP2	E3 SUMO-protein ligase RanBP2 OS=Homo sapiens GN=RANBP2 PE=1 SV=2	11	11	32	22000000	17000000	19000000	28000000	33000000	22000000	19500000	25500000	1.30769	0.387023	0.215269	0.667019	27500000	30500000	1.41026	1.5641	0.495957	0.645335	4	FALSE	TRUE	TRUE	90	411	21.8978	Tpossible_mito	ADANE|ANE1|IIAE3|NUP358|TRP1|TRP2|P49792	ENSG00000153201
SUPT6H	Transcription elongation factor SPT6 OS=Homo sapiens GN=SUPT6H PE=1 SV=2	2	2	3	15000000	13000000			1700000		14000000	425000	0.0303571	-5.04182	0.0218975	1.65961	850000	850000	0.0607143	0.0607143	-4.04182	-4.04182	1	TRUE	FALSE	FALSE	34	411	8.27251	Tnon_mito	SPT6|SPT6H|emb-5|Q7KZ85	ENSG00000109111
SART3	Squamous cell carcinoma antigen recognized by T-cells 3 OS=Homo sapiens GN=SART3 PE=1 SV=1	5	5	11	21000000	19000000	29000000	30000000	20000000	21000000	20000000	25000000	1.25	0.321928	0.154256	0.811759	20500000	25000000	1.025	1.25	0.0356239	0.321928	4	FALSE	TRUE	TRUE	59	411	14.3552	Tnon_mito	DSAP1|P100|RP11-13G14|TIP110|p110|p110(nrb)|Q15020	ENSG00000075856
DIS3	Exosome complex exonuclease RRP44 OS=Homo sapiens GN=DIS3 PE=1 SV=2	10	10	31	68000000	64000000	42000000	52000000	36000000	30000000	66000000	40000000	0.606061	-0.722466	0.00794083	2.10013	33000000	44000000	0.5	0.666667	-1	-0.584963	4	TRUE	TRUE	TRUE	16	411	3.89294	Tnon_mito	2810028N01Rik|EXOSC11|KIAA1008|RRP44|dis3p|Q9Y2L1	ENSG00000083520
WDFY3	WD repeat and FYVE domain-containing protein 3 OS=Homo sapiens GN=WDFY3 PE=1 SV=2	1	1	1				6900000			0	1725000	100	6.64386	0.391002	0.407821	0	3450000	0	100		6.64386	1	FALSE	FALSE	FALSE	0	411	0	Tnon_mito	ALFY|ZFYVE25|Q8IZQ1	ENSG00000163625
NAA15	N-alpha-acetyltransferase 15, NatA auxiliary subunit OS=Homo sapiens GN=NAA15 PE=1 SV=1	25	25	107	110000000	100000000	84000000	130000000	73000000	85000000	105000000	93000000	0.885714	-0.175087	0.430134	0.366396	79000000	101500000	0.752381	0.966667	-0.410465	-0.0489096	4	FALSE	TRUE	TRUE	32	411	7.78589	Tnon_mito	Ga19|NARG1|NAT1P|NATH|TBDN|TBDN100|Q9BXJ9	ENSG00000164134
TRMT1L	TRMT1-like protein OS=Homo sapiens GN=TRMT1L PE=1 SV=2	4	4	13	32000000	29000000	22000000	24000000	19000000	16000000	30500000	20250000	0.663934	-0.590887	0.0157058	1.80394	17500000	21500000	0.57377	0.704918	-0.801454	-0.504473	4	TRUE	TRUE	TRUE	43	411	10.4623	Tnon_mito	C1orf25|MST070|TRM1L|bG120K12.3|Q7Z2T5	ENSG00000121486
DTD1	D-tyrosyl-tRNA(Tyr) deacylase 1 OS=Homo sapiens GN=DTD1 PE=1 SV=2	2	2	7	24000000	17000000	18000000	20000000	14000000	16000000	20500000	17000000	0.829268	-0.270089	0.490779	0.309114	15000000	17000000	0.731707	0.829268	-0.450661	-0.270089	4	FALSE	FALSE	TRUE	16	411	3.89294	Tnon_mito	C20orf88|DUE-B|DUEB|HARS2|bA379J5.3|bA555E18.1|pqn-68|Q8TEA8	ENSG00000125821
DST	Dystonin OS=Homo sapiens GN=DST PE=2 SV=2	1	1	1	23000000						11500000	0	0		0.5	0.30103	0	0	0	0			0	FALSE	FALSE	FALSE	27	411	6.56934	Tnon_mito	BP240|BPA|BPAG1|CATX-15|CATX15|D6S1101|DMH|DT|EBSB2|HSAN6|MACF2|Q03001	ENSG00000151914
DNAJC2	DnaJ homolog subfamily C member 2 OS=Homo sapiens GN=DNAJC2 PE=1 SV=4	4	4	14	26000000	13000000	17000000	20000000	16000000	25000000	19500000	19500000	1	0	1	0	20500000	18000000	1.05128	0.923077	0.0721498	-0.115477	4	FALSE	TRUE	TRUE	5	411	1.21655	Tnon_mito	MPHOSPH11|MPP11|ZRF1|ZUO1|Q99543	ENSG00000105821
SMARCAD1	Isoform 2 of SWI/SNF-related matrix-associated actin-dependent regulator of chromatin subfamily A containing DEAD/H box 1 OS=Homo sapiens GN=SMARCAD1	1	1	1				39000000			0	9750000	100	6.64386	0.391002	0.407821	0	19500000	0	100		6.64386	1	FALSE	FALSE	FALSE	6	411	1.45985	Tnon_mito	ADERM|ETL1|HEL1|Q9H4L7	ENSG00000163104
CIAPIN1	Anamorsin OS=Homo sapiens GN=CIAPIN1 PE=1 SV=2	2	2	12	30000000	23000000	10000000	12000000	9800000	13000000	26500000	11200000	0.422642	-1.24249	0.129033	0.889298	11400000	10900000	0.430189	0.411321	-1.21696	-1.28166	4	FALSE	FALSE	TRUE	21	411	5.10949	Tpossible_mito	2810413N20Rik|Anamorsin|DRE2|PRO0915|Q6FI81	ENSG00000005194
MOSPD2	Motile sperm domain-containing protein 2 OS=Homo sapiens GN=MOSPD2 PE=1 SV=1	2	2	2			22000000		9800000		0	7950000	100	6.64386	0.225273	0.64729	4900000	4900000	100	100	6.64386	6.64386	2	FALSE	FALSE	FALSE	1	411	0.243309	Tnon_mito	Q8NHP6	ENSG00000130150
LAMP2	Isoform LAMP-2B of Lysosome-associated membrane glycoprotein 2 OS=Homo sapiens GN=LAMP2	5	5	16	68000000	44000000	29000000	100000000	21000000		56000000	37500000	0.669643	-0.578536	0.497316	0.303367	10500000	60500000	0.1875	1.08036	-2.41504	0.111508	3	FALSE	TRUE	TRUE	4	411	0.973236	Tnon_mito	CD107b|LAMP-2|LAMPB|LGP110|P13473	ENSG00000005893
VTI1B	Vesicle transport through interaction with t-SNAREs homolog 1B OS=Homo sapiens GN=VTI1B PE=1 SV=3	1	1	8	24000000	19000000	30000000	31000000	25000000	31000000	21500000	29250000	1.36047	0.4441	0.135583	0.867796	28000000	28000000	1.30233	1.30233	0.38109	0.38109	4	FALSE	FALSE	TRUE	2	411	0.486618	Tnon_mito	VTI1|VTI1-LIKE|VTI1L|VTI2|v-SNARE|vti1-rp1|Q9UEU0	ENSG00000100568
UBAP2	Ubiquitin-associated protein 2 OS=Homo sapiens GN=UBAP2 PE=1 SV=1	2	2	8	15000000		14000000	16000000	15000000	13000000	7500000	14500000	1.93333	0.95109	0.521287	0.282923	14000000	15500000	1.86667	2.06667	0.900464	1.04731	4	FALSE	FALSE	TRUE	39	411	9.48905	Tnon_mito	UBAP-2|Q5T6F2	ENSG00000137073
GAA	Lysosomal alpha-glucosidase OS=Homo sapiens GN=GAA PE=1 SV=4	2	2	5		67000000	17000000	36000000	29000000	21000000	33500000	25750000	0.768657	-0.379589	0.855464	0.0677981	25000000	32500000	0.746269	0.970149	-0.422233	-0.0437214	4	FALSE	FALSE	TRUE	3	411	0.729927	Tnon_mito	LYAG|P10253	ENSG00000171298
PGRMC1	Membrane-associated progesterone receptor component 1 OS=Homo sapiens GN=PGRMC1 PE=1 SV=3	3	4	37	230000000	120000000	160000000	200000000	130000000	130000000	175000000	155000000	0.885714	-0.175087	0.779335	0.108276	130000000	165000000	0.742857	0.942857	-0.428843	-0.0848889	4	FALSE	TRUE	TRUE	40	411	9.73236	Tnon_mito	HPR6.6|MPR|O00264	ENSG00000101856
STIP1	Stress-induced-phosphoprotein 1 OS=Homo sapiens GN=STIP1 PE=1 SV=1	18	18	116	580000000	530000000	270000000	360000000	260000000	260000000	555000000	287500000	0.518018	-0.948926	0.00509328	2.293	260000000	310000000	0.468468	0.558559	-1.09398	-0.84022	4	TRUE	TRUE	TRUE	120	411	29.1971	Tnon_mito	HEL-S-94n|HOP|IEF-SSP-3521|P60|STI1|STI1L|P31948	ENSG00000168439
PFKM	Isoform 3 of 6-phosphofructokinase, muscle type OS=Homo sapiens GN=PFKM	1	1	2		17000000			6100000		8500000	1525000	0.179412	-2.47865	0.560683	0.251283	3050000	3050000	0.358824	0.358824	-1.47865	-1.47865	1	FALSE	FALSE	FALSE	30	411	7.29927	Tnon_mito	GSD7|PFK-1|PFK1|PFKA|PFKX|P08237	ENSG00000152556
PFKP	6-phosphofructokinase type C OS=Homo sapiens GN=PFKP PE=1 SV=2	4	4	8	34000000	35000000	17000000	25000000			34500000	10500000	0.304348	-1.71621	0.0310832	1.50747	0	12500000	0	0.362319		-1.46467	2	TRUE	TRUE	TRUE	75	411	18.2482	Tnon_mito	PFK-C|PFKF|Q01813	ENSG00000067057
CAST	Isoform 6 of Calpastatin OS=Homo sapiens GN=CAST	4	4	10	62000000	40000000	22000000		21000000	30000000	51000000	18250000	0.357843	-1.4826	0.142847	0.84513	25500000	10500000	0.5	0.205882	-1	-2.28011	3	FALSE	TRUE	TRUE	24	411	5.83942	Tnon_mito	BS-17|P20810	ENSG00000153113
CLN5	Ceroid-lipofuscinosis neuronal protein 5 OS=Homo sapiens GN=CLN5 PE=1 SV=2	2	2	4			23000000		25000000	33000000	0	20250000	100	6.64386	0.0647232	1.18894	29000000	12500000	100	100	6.64386	6.64386	3	FALSE	FALSE	FALSE	1	411	0.243309	Tnon_mito	NCL|O75503	ENSG00000102805
MATR3	Matrin-3 OS=Homo sapiens GN=MATR3 PE=4 SV=1	7	7	38	66000000	82000000	51000000	62000000	39000000	36000000	74000000	47000000	0.635135	-0.654865	0.103081	0.986822	37500000	50500000	0.506757	0.682432	-0.980635	-0.551242	4	FALSE	TRUE	TRUE	171	411	41.6058	Tnon_mito	MPD2|VCPDM|P43243	ENSG00000015479
MGME1	Mitochondrial genome maintenance exonuclease 1 OS=Homo sapiens GN=MGME1 PE=1 SV=1	2	2	14	22000000	37000000	34000000	71000000	32000000	35000000	29500000	43000000	1.45763	0.543622	0.329324	0.482377	33500000	51500000	1.13559	1.74576	0.183446	0.803857	4	FALSE	FALSE	TRUE	2	411	0.486618	Tmito	C20orf72|DDK1|MTDPS11|bA504H3.4|Q9BQP7	ENSG00000125871
SEPT2	Isoform 2 of Septin-2 OS=Homo sapiens GN=SEPT2	12	12	89	220000000	210000000	200000000	250000000	170000000	180000000	215000000	200000000	0.930233	-0.104337	0.469631	0.328244	175000000	210000000	0.813953	0.976744	-0.296982	-0.0339473	4	FALSE	TRUE	TRUE	88	411	21.4112	Tnon_mito	DIFF6|NEDD-5|NEDD5|Pnutl3|hNedd5|Q15019	ENSG00000168385
SEPT9	Septin-9 OS=Homo sapiens GN=SEPT9 PE=1 SV=2	15	15	79	110000000	74000000	85000000	100000000	86000000	87000000	92000000	89500000	0.972826	-0.0397462	0.912518	0.0397587	86500000	93000000	0.940217	1.01087	-0.0889337	0.0155969	4	FALSE	TRUE	TRUE	79	411	19.2214	Tnon_mito	AF17q25|MSF|MSF1|NAPB|PNUTL4|SINT1|SeptD1|Q9UHD8	ENSG00000184640
CRKL	Crk-like protein OS=Homo sapiens GN=CRKL PE=1 SV=1	2	2	6	34000000	51000000		42000000			42500000	10500000	0.247059	-2.01707	0.084299	1.07418	0	21000000	0	0.494118		-1.01707	1	FALSE	FALSE	TRUE	33	411	8.0292	Tnon_mito	P46109	ENSG00000099942
SIK3	Serine/threonine-protein kinase SIK3 (Fragment) OS=Homo sapiens GN=SIK3 PE=4 SV=1	1	1	1				8100000			0	2025000	100	6.64386	0.391002	0.407821	0	4050000	0	100		6.64386	1	FALSE	FALSE	FALSE	0	411	0	Tnon_mito	QSK|SIK-3|Q9Y2K2	ENSG00000160584
SYPL1	Isoform 2 of Synaptophysin-like protein 1 OS=Homo sapiens GN=SYPL1	2	2	8	29000000	17000000	20000000	43000000	12000000	56000000	23000000	32750000	1.42391	0.509861	0.455086	0.341906	34000000	27500000	1.47826	1.19565	0.563901	0.257798	4	FALSE	FALSE	TRUE	10	411	2.43309	Tnon_mito	H-SP1|SYPL|Q16563	ENSG00000008282
PPP1CB	Serine/threonine-protein phosphatase PP1-beta catalytic subunit OS=Homo sapiens GN=PPP1CB PE=1 SV=3	2	9	51			18000000	32000000	20000000	21000000	0	22750000	100	6.64386	0.00545244	2.26341	20500000	26000000	100	100	6.64386	6.64386	4	TRUE	TRUE	TRUE	121	411	29.4404	Tnon_mito	HEL-S-80p|PP-1B|PP1B|PP1beta|PPP1CD|P62140	ENSG00000213639
RPA3	Replication protein A 14 kDa subunit OS=Homo sapiens GN=RPA3 PE=1 SV=1	5	5	28	150000000	130000000	60000000	77000000	56000000	52000000	140000000	61250000	0.4375	-1.19265	0.0330673	1.4806	54000000	66500000	0.385714	0.475	-1.3744	-1.074	4	TRUE	TRUE	TRUE	43	411	10.4623	Tnon_mito	REPA3|P35244	ENSG00000106399
NR2C1	Nuclear receptor subfamily 2 group C member 1 (Fragment) OS=Homo sapiens GN=NR2C1 PE=4 SV=1	1	1	1						310000000	0	77500000	100	6.64386	0.391002	0.407821	155000000	0	100	0	6.64386		1	FALSE	FALSE	FALSE	12	411	2.91971	Tnon_mito	TR2|P13056	ENSG00000120798
EMC2	ER membrane protein complex subunit 2 OS=Homo sapiens GN=EMC2 PE=1 SV=1	3	3	8	35000000	33000000	36000000		38000000	49000000	34000000	30750000	0.904412	-0.144948	0.780617	0.107562	43500000	19000000	1.27941	0.558824	0.355481	-0.839535	3	FALSE	TRUE	TRUE	4	411	0.973236	Tmito	KIAA0103|TTC35|Q15006	ENSG00000104412
RUVBL2	RuvB-like 2 OS=Homo sapiens GN=RUVBL2 PE=1 SV=3	13	13	74	170000000	130000000	91000000	120000000	99000000	140000000	150000000	112500000	0.75	-0.415037	0.26764	0.572448	119500000	109500000	0.796667	0.73	-0.327952	-0.454032	4	FALSE	TRUE	TRUE	141	411	34.3066	Tnon_mito	ECP51|INO80J|REPTIN|RVB2|TIH2|TIP48|TIP49B|Q9Y230	ENSG00000183207
PAPOLA	Poly(A) polymerase alpha OS=Homo sapiens GN=PAPOLA PE=1 SV=4	1	1	1		35000000					17500000	0	0		0.5	0.30103	0	0	0	0			0	FALSE	FALSE	FALSE	28	411	6.81265	Tnon_mito	PAP|P51003	ENSG00000090060
SF3B2	Splicing factor 3B subunit 2 OS=Homo sapiens GN=SF3B2 PE=1 SV=2	11	11	44	93000000	71000000	71000000	85000000	110000000	97000000	82000000	90750000	1.10671	0.146274	0.584887	0.232928	103500000	97500000	1.2622	1.18902	0.335935	0.249778	4	FALSE	TRUE	TRUE	134	411	32.6034	Tnon_mito	Cus1|SAP145|SF3B145|SF3b1|SF3b150|Q13435	ENSG00000087365
PANK4	Pantothenate kinase 4 (Fragment) OS=Homo sapiens GN=PANK4 PE=4 SV=1	2	2	3	180000000	8900000					94450000	0	0		0.468548	0.329246	0	0	0	0			0	FALSE	FALSE	FALSE	4	411	0.973236	Tnon_mito	Q9NVE7	ENSG00000157881
WDR82	WD repeat-containing protein 82 OS=Homo sapiens GN=WDR82 PE=1 SV=1	2	2	8	9200000		34000000	34000000	23000000	34000000	4600000	31250000	6.79348	2.76415	0.0486789	1.31266	28500000	28500000	6.19565	6.19565	2.63126	2.63126	4	TRUE	FALSE	TRUE	42	411	10.219	Tnon_mito	MST107|MSTP107|PRO2730|PRO34047|SWD2|TMEM113|WDR82A|Q6UXN9	ENSG00000164091
OSBPL11	Oxysterol-binding protein-related protein 11 OS=Homo sapiens GN=OSBPL11 PE=1 SV=2	3	3	8	30000000		30000000	34000000	34000000	36000000	15000000	33500000	2.23333	1.1592	0.432659	0.363855	35000000	34000000	2.33333	2.26667	1.22239	1.18057	4	FALSE	TRUE	TRUE	6	411	1.45985	Tnon_mito	ORP-11|ORP11|OSBP12|TCCCIA00292|Q9BXB4	ENSG00000144909
BABAM1	BRISC and BRCA1-A complex member 1 OS=Homo sapiens GN=BABAM1 PE=2 SV=1	1	1	2		18000000		19000000			9000000	4750000	0.527778	-0.921997	0.72561	0.139297	0	9500000	0	1.05556		0.0780025	1	FALSE	FALSE	FALSE	12	411	2.91971	Tnon_mito	C19orf62|MERIT40|NBA1|Q9NWV8	ENSG00000105393
S100A13	Protein S100-A13 OS=Homo sapiens GN=S100A13 PE=1 SV=1	2	2	6		71000000	50000000	85000000	57000000	57000000	35500000	62250000	1.75352	0.810255	0.586976	0.23138	57000000	71000000	1.60563	2	0.683143	1	4	FALSE	FALSE	TRUE	1	411	0.243309	Tnon_mito	Q99584	ENSG00000189171
EGLN1	Egl nine homolog 1 OS=Homo sapiens GN=EGLN1 PE=1 SV=1	2	2	5			18000000	16000000	13000000	14000000	0	15250000	100	6.64386	0.000831525	3.08012	13500000	14500000	100	100	6.64386	6.64386	4	TRUE	FALSE	TRUE	6	411	1.45985	Tnon_mito	C1orf12|ECYT3|HIF-PH2|HIFPH2|HPH-2|HPH2|PHD2|SM20|ZMYND6|Q9GZT9	ENSG00000135766
LARP4	Isoform 4 of La-related protein 4 OS=Homo sapiens GN=LARP4	3	3	14	28000000	28000000	41000000	32000000	25000000	26000000	28000000	31000000	1.10714	0.146841	0.474021	0.324202	25500000	28500000	0.910714	1.01786	-0.13493	0.0255351	4	FALSE	TRUE	TRUE	34	411	8.27251	Tnon_mito	Q71RC2	ENSG00000161813
APEX1	DNA-(apurinic or apyrimidinic site) lyase OS=Homo sapiens GN=APEX1 PE=1 SV=2	15	15	115	180000000	280000000	170000000	260000000	160000000	130000000	230000000	180000000	0.782609	-0.353637	0.490075	0.309737	145000000	210000000	0.630435	0.913043	-0.665581	-0.131245	4	FALSE	TRUE	TRUE	54	411	13.1387	Tpossible_mito	APE|APE1|APEN|APEX|APX|HAP1|REF1|P27695	ENSG00000100823
CTPS1	CTP synthase 1 OS=Homo sapiens GN=CTPS1 PE=1 SV=2	10	10	22	88000000	63000000	25000000	46000000	44000000	17000000	75500000	33000000	0.437086	-1.19401	0.118745	0.925385	30500000	45000000	0.403974	0.596026	-1.30767	-0.746552	4	FALSE	TRUE	TRUE	78	411	18.9781	Tnon_mito	CTPS|P17812	ENSG00000171793
DNAJA1	DnaJ homolog subfamily A member 1 OS=Homo sapiens GN=DNAJA1 PE=1 SV=2	4	4	21	110000000	68000000	110000000	190000000	97000000	120000000	89000000	129250000	1.45225	0.538287	0.267279	0.573035	108500000	143500000	1.2191	1.61236	0.285818	0.689173	4	FALSE	TRUE	TRUE	115	411	27.9805	Tpossible_mito	DJ-2|DjA1|HDJ2|HSDJ|HSJ2|HSPF4|NEDD7|hDJ-2|P31689	ENSG00000086061
PSMC3	26S protease regulatory subunit 6A OS=Homo sapiens GN=PSMC3 PE=3 SV=1	13	13	60	100000000	110000000	52000000	93000000	45000000	64000000	105000000	63500000	0.604762	-0.725561	0.0248901	1.60397	54500000	69000000	0.519048	0.657143	-0.946061	-0.605721	4	TRUE	TRUE	TRUE	113	411	27.4939	Tnon_mito	TBP1|P17980	ENSG00000165916
PSMD10	26S proteasome non-ATPase regulatory subunit 10 OS=Homo sapiens GN=PSMD10 PE=1 SV=1	1	1	5		120000000	70000000	85000000	54000000	70000000	60000000	69750000	1.1625	0.217231	0.89756	0.0469367	62000000	69500000	1.03333	1.15833	0.0473057	0.21205	4	FALSE	FALSE	TRUE	12	411	2.91971	Tnon_mito	dJ889N15.2|p28|p28(GANK)|O75832	ENSG00000101843
DDX21	Nucleolar RNA helicase 2 OS=Homo sapiens GN=DDX21 PE=1 SV=5	13	14	53	84000000	66000000	49000000	61000000	52000000	69000000	75000000	57750000	0.77	-0.37707	0.26476	0.577148	60500000	56500000	0.806667	0.753333	-0.309955	-0.40864	4	FALSE	TRUE	TRUE	179	411	43.5523	Tnon_mito	GUA|GURDB|RH-II/GU|RH-II/GuA|Q9NR30	ENSG00000165732
SPTLC2	Serine palmitoyltransferase 2 OS=Homo sapiens GN=SPTLC2 PE=1 SV=1	6	6	16	41000000	33000000	30000000	44000000	23000000	27000000	37000000	31000000	0.837838	-0.255257	0.388125	0.411029	25000000	33500000	0.675676	0.905405	-0.565597	-0.143364	4	FALSE	TRUE	TRUE	1	411	0.243309	Tmito	HSN1C|LCB2|LCB2A|NSAN1C|SPT2|hLCB2a|O15270	ENSG00000100596
DNAJC10	DnaJ homolog subfamily C member 10 OS=Homo sapiens GN=DNAJC10 PE=1 SV=2	10	10	38	16000000	17000000	31000000	39000000	36000000	31000000	16500000	34250000	2.07576	1.05364	0.00203183	2.69211	33500000	37500000	2.0303	2.27273	1.0217	1.18442	4	TRUE	TRUE	TRUE	26	411	6.32603	Tnon_mito	ERdj5|JPDI|MTHr|PDIA19|Q8IXB1	ENSG00000077232
DDX24	ATP-dependent RNA helicase DDX24 OS=Homo sapiens GN=DDX24 PE=1 SV=1	1	1	1		9500000					4750000	0	0		0.5	0.30103	0	0	0	0			0	FALSE	FALSE	FALSE	40	411	9.73236	Tnon_mito	Q9GZR7	ENSG00000089737
ASNA1	ATPase ASNA1 OS=Homo sapiens GN=ASNA1 PE=1 SV=2	7	7	19	61000000	77000000	24000000	51000000	52000000	59000000	69000000	46500000	0.673913	-0.569366	0.139465	0.855533	55500000	51500000	0.804348	0.746377	-0.314109	-0.422024	4	FALSE	TRUE	TRUE	11	411	2.6764	Tnon_mito	ARSA-I|ARSA1|ASNA-I|GET3|TRC40|hASNA-I|O43681	ENSG00000198356
UBE2N	Ubiquitin-conjugating enzyme E2 N OS=Homo sapiens GN=UBE2N PE=1 SV=1	6	6	22	140000000	81000000	49000000	52000000	38000000	43000000	110500000	45500000	0.411765	-1.28011	0.2682	0.571542	40500000	45000000	0.366516	0.40724	-1.44805	-1.29605	4	FALSE	TRUE	TRUE	46	411	11.1922	Tnon_mito	HEL-S-71|UBC13|UbcH-ben|UbcH13|P61088	ENSG00000177889
PRPSAP1	Isoform 2 of Phosphoribosyl pyrophosphate synthase-associated protein 1 OS=Homo sapiens GN=PRPSAP1	3	4	7	21000000	17000000	5500000		4100000		19000000	2400000	0.126316	-2.98489	0.0190896	1.7192	2050000	2050000	0.107895	0.107895	-3.2123	-3.2123	2	TRUE	TRUE	TRUE	59	411	14.3552	Tnon_mito	PAP39|Q14558	ENSG00000161542
SLC1A5	Neutral amino acid transporter B(0) OS=Homo sapiens GN=SLC1A5 PE=1 SV=2	3	3	7	17000000	17000000	25000000	43000000	26000000	27000000	17000000	30250000	1.77941	0.8314	0.0531559	1.27445	26500000	34500000	1.55882	2.02941	0.640458	1.02106	4	FALSE	TRUE	TRUE	70	411	17.0316	Tnon_mito	AAAT|ASCT2|ATBO|M7V1|M7VS1|R16|RDRC|Q15758	ENSG00000105281
GLB1	Beta-galactosidase OS=Homo sapiens GN=GLB1 PE=1 SV=2	6	6	11	28000000		22000000	47000000	29000000	31000000	14000000	32250000	2.30357	1.20387	0.399456	0.398531	30000000	38000000	2.14286	2.71429	1.09954	1.44057	4	FALSE	TRUE	TRUE	2	411	0.486618	Tnon_mito	EBP|ELNR1|MPS4B|P16278	ENSG00000170266
TPD52	Isoform 3 of Tumor protein D52 OS=Homo sapiens GN=TPD52	5	5	15	78000000	55000000	80000000	45000000	40000000	49000000	66500000	53500000	0.804511	-0.313815	0.456356	0.340696	44500000	42500000	0.669173	0.639098	-0.579549	-0.645891	4	FALSE	TRUE	TRUE	18	411	4.37956	Tnon_mito	D52|N8L|PC-1|PrLZ|hD52|P55327	ENSG00000076554
PDCD5	Programmed cell death protein 5 OS=Homo sapiens GN=PDCD5 PE=1 SV=3	5	5	25	110000000	120000000	60000000	100000000	79000000	59000000	115000000	74500000	0.647826	-0.626322	0.0207373	1.68325	69000000	89500000	0.6	0.778261	-0.736966	-0.361674	4	TRUE	TRUE	TRUE	68	411	16.545	Tnon_mito	TFAR19|O14737	ENSG00000105185
LAMTOR5	Ragulator complex protein LAMTOR5 OS=Homo sapiens GN=LAMTOR5 PE=1 SV=1	1	1	5	66000000	41000000		78000000	81000000	69000000	53500000	57000000	1.06542	0.091423	0.885942	0.0525946	75000000	79500000	1.40187	1.48598	0.487352	0.571416	3	FALSE	FALSE	TRUE	1	411	0.243309	Tnon_mito	HBXIP|XIP|O43504	ENSG00000134248
NCSTN	Nicastrin OS=Homo sapiens GN=NCSTN PE=1 SV=2	4	4	10			29000000	50000000	30000000	28000000	0	34250000	100	6.64386	0.00738105	2.13188	29000000	40000000	100	100	6.64386	6.64386	4	TRUE	TRUE	TRUE	2	411	0.486618	Tnon_mito	APH2|Q92542	ENSG00000162736
TTC1	Tetratricopeptide repeat protein 1 OS=Homo sapiens GN=TTC1 PE=1 SV=1	10	10	22	74000000	48000000	45000000	53000000	32000000	47000000	61000000	44250000	0.72541	-0.463132	0.405615	0.391886	39500000	42500000	0.647541	0.696721	-0.626957	-0.521346	4	FALSE	TRUE	TRUE	1	411	0.243309	Tnon_mito	TPR1|Q99614	ENSG00000113312
UGDH	UDP-glucose 6-dehydrogenase OS=Homo sapiens GN=UGDH PE=1 SV=1	2	2	3	24000000	18000000					21000000	0	0		0.0903345	1.04415	0	0	0	0			0	FALSE	FALSE	FALSE	5	411	1.21655	Tnon_mito	GDH|UDP-GlcDH|UDPGDH|UGD|O60701	ENSG00000109814
RPL35	60S ribosomal protein L35 OS=Homo sapiens GN=RPL35 PE=1 SV=2	3	4	24	1100000000	780000000	1100000000	600000000	530000000	550000000	940000000	695000000	0.739362	-0.435648	0.341449	0.466674	540000000	565000000	0.574468	0.601064	-0.799701	-0.73441	4	FALSE	TRUE	TRUE	156	411	37.9562	Tnon_mito	L35|P42766	ENSG00000136942
CNP	2',3'-cyclic-nucleotide 3'-phosphodiesterase OS=Homo sapiens GN=CNP PE=1 SV=2	11	11	43	40000000	39000000	66000000	65000000	48000000	66000000	39500000	61250000	1.55063	0.632857	0.0154632	1.8107	57000000	56500000	1.44304	1.43038	0.529109	0.516398	4	TRUE	TRUE	TRUE	26	411	6.32603	Tpossible_mito	CNP1|P09543	ENSG00000173786
KRT18	Keratin, type I cytoskeletal 18 OS=Homo sapiens GN=KRT18 PE=1 SV=2	1	2	12	15000000						7500000	0	0		0.5	0.30103	0	0	0	0			0	FALSE	FALSE	TRUE	238	411	57.9075	Tnon_mito	CYK18|K18|P05783	ENSG00000111057
GANAB	Neutral alpha-glucosidase AB OS=Homo sapiens GN=GANAB PE=1 SV=3	1	32	305	400000000	69000000	750000000	740000000	460000000	550000000	234500000	625000000	2.66525	1.41427	0.215312	0.666932	505000000	600000000	2.15352	2.55864	1.1067	1.35537	4	FALSE	TRUE	TRUE	105	411	25.5474	Tnon_mito	G2AN|GLUII|Q14697	ENSG00000089597
GANAB	Isoform 2 of Neutral alpha-glucosidase AB OS=Homo sapiens GN=GANAB	2	33	292	53000000	50000000	75000000	64000000	76000000	73000000	51500000	72000000	1.39806	0.483424	0.00280406	2.55221	74500000	70000000	1.4466	1.35922	0.532668	0.442782	4	TRUE	TRUE	TRUE	105	411	25.5474	Tnon_mito	G2AN|GLUII|Q14697	ENSG00000089597
PELP1	Isoform 2 of Proline-, glutamic acid- and leucine-rich protein 1 OS=Homo sapiens GN=PELP1	4	4	10	13000000	13000000	15000000	19000000		18000000	13000000	13000000	1	0	1	0	9000000	9500000	0.692308	0.730769	-0.530515	-0.452512	3	FALSE	TRUE	TRUE	37	411	9.00243	Tnon_mito	MNAR|P160|Q8IZL8	ENSG00000141456
ASPH	Aspartyl/asparaginyl beta-hydroxylase OS=Homo sapiens GN=ASPH PE=1 SV=3	5	5	17	46000000	29000000	41000000	56000000	33000000	30000000	37500000	40000000	1.06667	0.0931094	0.83075	0.0805294	31500000	44500000	0.84	1.18667	-0.251539	0.246915	4	FALSE	TRUE	TRUE	14	411	3.40633	Tnon_mito	AAH|BAH|CASQ2BP1|HAAH|JCTN|junctin|Q12797	ENSG00000198363
USP7	Ubiquitin carboxyl-terminal hydrolase 7 OS=Homo sapiens GN=USP7 PE=1 SV=2	7	7	11	24000000	31000000	17000000	15000000	13000000		27500000	11250000	0.409091	-1.28951	0.0463231	1.3342	6500000	14000000	0.236364	0.509091	-2.08092	-0.974005	3	TRUE	TRUE	TRUE	65	411	15.8151	Tnon_mito	HAUSP|TEF1|Q93009	ENSG00000187555
CLPTM1	Cleft lip and palate transmembrane protein 1 OS=Homo sapiens GN=CLPTM1 PE=1 SV=1	4	4	18	29000000	7900000	14000000	37000000	18000000	23000000	18450000	23000000	1.24661	0.318013	0.745648	0.127466	20500000	27500000	1.11111	1.49051	0.152003	0.575811	4	FALSE	TRUE	TRUE	2	411	0.486618	Tnon_mito	O96005	ENSG00000104853
EIF3L	Eukaryotic translation initiation factor 3 subunit L OS=Homo sapiens GN=EIF3L PE=1 SV=1	19	19	104	160000000	120000000	110000000	130000000	130000000	93000000	140000000	115750000	0.826786	-0.274415	0.421157	0.375556	111500000	130000000	0.796429	0.928571	-0.328383	-0.106915	4	FALSE	TRUE	TRUE	92	411	22.3844	Tnon_mito	EIF3EIP|EIF3S11|EIF3S6IP|HSPC021|HSPC025|MSTP005|Q9Y262	ENSG00000100129
ACTN1	Isoform 4 of Alpha-actinin-1 OS=Homo sapiens GN=ACTN1	12	28	167	70000000	84000000	80000000	79000000	51000000	60000000	77000000	67500000	0.876623	-0.189971	0.411563	0.385563	55500000	65000000	0.720779	0.844156	-0.472371	-0.244419	4	FALSE	TRUE	TRUE	128	411	31.1436	Tnon_mito	BDPLT15|P12814	ENSG00000072110
BLVRB	Flavin reductase (NADPH) OS=Homo sapiens GN=BLVRB PE=1 SV=3	2	2	7	53000000	41000000		31000000	52000000	24000000	47000000	26750000	0.569149	-0.813122	0.174647	0.757839	38000000	41500000	0.808511	0.882979	-0.306661	-0.179549	3	FALSE	FALSE	TRUE	10	411	2.43309	Tnon_mito	BVRB|FLR|HEL-S-10|SDR43U1|P30043	ENSG00000090013
PCBP1	Poly(rC)-binding protein 1 OS=Homo sapiens GN=PCBP1 PE=1 SV=2	12	14	128	500000000	340000000	200000000	330000000	250000000	270000000	420000000	262500000	0.625	-0.678072	0.275175	0.560391	260000000	290000000	0.619048	0.690476	-0.691878	-0.534336	4	FALSE	TRUE	TRUE	194	411	47.2019	Tnon_mito	HEL-S-85|HNRPE1|HNRPX|hnRNP-E1|hnRNP-X|Q15365	ENSG00000169564
SPTBN1	Spectrin beta chain, non-erythrocytic 1 OS=Homo sapiens GN=SPTBN1 PE=1 SV=2	36	36	106	72000000	78000000	81000000	110000000	46000000	47000000	75000000	71000000	0.946667	-0.0790716	0.813454	0.0896668	46500000	78000000	0.62	1.04	-0.68966	0.0565835	4	FALSE	TRUE	TRUE	143	411	34.7932	Tnon_mito	ELF|HEL102|SPTB2|betaSpII|Q01082	ENSG00000115306
GNB2L1	Guanine nucleotide-binding protein subunit beta-2-like 1 OS=Homo sapiens GN=GNB2L1 PE=1 SV=3	18	18	254	1300000000	1100000000	1000000000	1200000000	890000000	1100000000	1200000000	1047500000	0.872917	-0.196084	0.334507	0.475595	995000000	1045000000	0.829167	0.870833	-0.270266	-0.199531	4	FALSE	TRUE	TRUE	135	411	32.8467	Tpossible_mito	Gnb2-rs1|H12.3|HLC-7|PIG21|RACK1|P63244	ENSG00000204628
LRRC59	Leucine-rich repeat-containing protein 59 OS=Homo sapiens GN=LRRC59 PE=1 SV=1	12	12	104	570000000	900000000	460000000	560000000	670000000	470000000	735000000	540000000	0.734694	-0.444785	0.436969	0.359549	570000000	615000000	0.77551	0.836735	-0.366782	-0.257158	4	FALSE	TRUE	TRUE	80	411	19.4647	Tpossible_mito	p34|Q96AG4	ENSG00000108829
DONSON	Protein downstream neighbor of Son OS=Homo sapiens GN=DONSON PE=1 SV=2	1	1	1					8200000		0	2050000	100	6.64386	0.391002	0.407821	4100000	4100000	100	100	6.64386	6.64386	1	FALSE	FALSE	FALSE	0	411	0	Tnon_mito	B17|C21orf60|Q9NYP3	ENSG00000159147
GEMIN8	Gem-associated protein 8 OS=Homo sapiens GN=GEMIN8 PE=1 SV=1	1	1	1						18000000	0	4500000	100	6.64386	0.391002	0.407821	9000000	0	100	0	6.64386		1	FALSE	FALSE	FALSE	8	411	1.94647	Tnon_mito	FAM51A1|Q9NWZ8	ENSG00000046647
ARF3	ADP-ribosylation factor 3 OS=Homo sapiens GN=ARF3 PE=1 SV=2	3	8	65	150000000	97000000	66000000	71000000	56000000	70000000	123500000	65750000	0.532389	-0.909448	0.269428	0.569557	63000000	63500000	0.510121	0.51417	-0.971087	-0.959683	4	FALSE	TRUE	TRUE	98	411	23.8443	Tnon_mito	P61204	ENSG00000134287
MYH9	Myosin-9 OS=Homo sapiens GN=MYH9 PE=1 SV=4	47	56	342	210000000	280000000	170000000	190000000	150000000	120000000	245000000	157500000	0.642857	-0.63743	0.202101	0.694431	135000000	170000000	0.55102	0.693878	-0.859822	-0.527247	4	FALSE	TRUE	TRUE	203	411	49.3917	Tnon_mito	BDPLT6|DFNA17|EPSTS|FTNS|MHA|NMHC-II-A|NMMHC-IIA|NMMHCA|P35579	ENSG00000100345
PEBP1	Phosphatidylethanolamine-binding protein 1 OS=Homo sapiens GN=PEBP1 PE=1 SV=3	8	8	51	290000000	340000000	95000000	110000000	160000000	110000000	315000000	118750000	0.376984	-1.40742	0.031596	1.50037	135000000	135000000	0.428571	0.428571	-1.22239	-1.22239	4	TRUE	TRUE	TRUE	37	411	9.00243	Tpossible_mito	HCNP|HCNPpp|HEL-210|HEL-S-34|PBP|PEBP|PEBP-1|RKIP|P30086	ENSG00000089220
RAP1B	Ras-related protein Rap-1b OS=Homo sapiens GN=RAP1B PE=1 SV=1	7	7	43	75000000	120000000	100000000	130000000	120000000	73000000	97500000	105750000	1.08462	0.117184	0.784456	0.105432	96500000	125000000	0.989744	1.28205	-0.0148733	0.358454	4	FALSE	TRUE	TRUE	48	411	11.6788	Tnon_mito	K-REV|RAL1B|P61224	ENSG00000127314
RPL12	60S ribosomal protein L12 OS=Homo sapiens GN=RPL12 PE=1 SV=1	6	6	97	1000000000	890000000	700000000	900000000	800000000	690000000	945000000	772500000	0.81746	-0.290779	0.112184	0.950071	745000000	850000000	0.78836	0.899471	-0.343074	-0.152851	4	FALSE	TRUE	TRUE	201	411	48.9051	Tnon_mito	L12|P30050	ENSG00000197958
ARL8B	ADP-ribosylation factor-like protein 8B OS=Homo sapiens GN=ARL8B PE=1 SV=1	8	8	33	35000000	120000000	120000000	150000000	67000000	40000000	77500000	94250000	1.21613	0.282296	0.770506	0.113224	53500000	108500000	0.690323	1.4	-0.534657	0.485427	4	FALSE	TRUE	TRUE	10	411	2.43309	Tnon_mito	ARL10C|Gie1|Q9NVJ2	ENSG00000134108
POLR1A	DNA-directed RNA polymerase I subunit RPA1 OS=Homo sapiens GN=POLR1A PE=1 SV=2	1	1	1	9800000						4900000	0	0		0.5	0.30103	0	0	0	0			0	FALSE	FALSE	FALSE	17	411	4.13625	Tnon_mito	A190|RPA1|RPA194|RPO1-4|RPO14|O95602	ENSG00000068654
MAN2B1	Lysosomal alpha-mannosidase OS=Homo sapiens GN=MAN2B1 PE=1 SV=3	5	5	9	18000000	25000000		31000000		19000000	21500000	12500000	0.581395	-0.782409	0.345347	0.461745	9500000	15500000	0.44186	0.72093	-1.17834	-0.472068	2	FALSE	TRUE	TRUE	2	411	0.486618	Tnon_mito	LAMAN|MANB|O00754	ENSG00000104774
GLA	Alpha-galactosidase A OS=Homo sapiens GN=GLA PE=1 SV=1	9	9	52	93000000	130000000	110000000	160000000	120000000	110000000	111500000	125000000	1.12108	0.164884	0.605043	0.218214	115000000	140000000	1.03139	1.25561	0.0445902	0.328383	4	FALSE	TRUE	TRUE	10	411	2.43309	Tnon_mito	GALA|P06280	ENSG00000102393
GM2A	Ganglioside GM2 activator OS=Homo sapiens GN=GM2A PE=1 SV=4	2	2	9	11000000	12000000		14000000	18000000	7500000	11500000	9875000	0.858696	-0.219781	0.709031	0.149335	12750000	16000000	1.1087	1.3913	0.148863	0.476438	3	FALSE	FALSE	TRUE	5	411	1.21655	Tpossible_mito	GM2-AP|SAP-3|P17900	ENSG00000196743
LGMN	Legumain OS=Homo sapiens GN=LGMN PE=1 SV=1	4	4	30	64000000	56000000	90000000	100000000	52000000	68000000	60000000	77500000	1.29167	0.369234	0.209853	0.678085	60000000	76000000	1	1.26667	0	0.341037	4	FALSE	TRUE	TRUE	1	411	0.243309	Tnon_mito	AEP|LGMN1|PRSC1|Q99538	ENSG00000100600
PSAP	Saposin-D OS=Homo sapiens GN=PSAP PE=4 SV=1	4	4	15	45000000	46000000	58000000	50000000	53000000	37000000	45500000	49500000	1.08791	0.121562	0.438954	0.357581	45000000	51500000	0.989011	1.13187	-0.0159415	0.178706	4	FALSE	TRUE	TRUE	5	411	1.21655	Tpossible_mito	GLBA|SAP1|P07602	ENSG00000197746
TMEM97	Transmembrane protein 97 OS=Homo sapiens GN=TMEM97 PE=1 SV=1	1	1	1		31000000					15500000	0	0		0.5	0.30103	0	0	0	0			0	FALSE	FALSE	FALSE	4	411	0.973236	Tnon_mito	MAC30|Q5BJF2	ENSG00000109084
PLBD1	Phospholipase B-like 1 OS=Homo sapiens GN=PLBD1 PE=1 SV=2	1	1	1				59000000			0	14750000	100	6.64386	0.391002	0.407821	0	29500000	0	100		6.64386	1	FALSE	FALSE	FALSE	3	411	0.729927	Tnon_mito	Q6P4A8	ENSG00000121316
PLBD2	Putative phospholipase B-like 2 OS=Homo sapiens GN=PLBD2 PE=1 SV=2	3	3	13	16000000	14000000	31000000	30000000	21000000	22000000	15000000	26000000	1.73333	0.793549	0.0198029	1.70327	21500000	25500000	1.43333	1.7	0.519374	0.765535	4	TRUE	TRUE	TRUE	1	411	0.243309	Tnon_mito	P76|Q8NHP8	ENSG00000151176
ATP1A1	Sodium/potassium-transporting ATPase subunit alpha-1 OS=Homo sapiens GN=ATP1A1 PE=1 SV=1	13	19	77	86000000	56000000	66000000	89000000	76000000	92000000	71000000	80750000	1.13732	0.185643	0.632516	0.198929	84000000	82500000	1.1831	1.16197	0.24257	0.216575	4	FALSE	TRUE	TRUE	45	411	10.9489	Tpossible_mito	P05023	ENSG00000163399
MATK	Isoform 2 of Megakaryocyte-associated tyrosine-protein kinase OS=Homo sapiens GN=MATK	1	1	1			38000000				0	9500000	100	6.64386	0.391002	0.407821	0	0	0	0			1	FALSE	FALSE	FALSE	0	411	0	Tnon_mito	CHK|CTK|HHYLTK|HYL|HYLTK|Lsk|P42679	ENSG00000007264
TRPC4	Isoform Epsilon of Short transient receptor potential channel 4 OS=Homo sapiens GN=TRPC4	1	1	1	190000000						95000000	0	0		0.5	0.30103	0	0	0	0			0	FALSE	FALSE	FALSE	0	411	0	Tnon_mito	HTRP-4|HTRP4|TRP4|Q9UBN4	ENSG00000133107
PABPN1	Polyadenylate-binding protein 2 OS=Homo sapiens GN=PABPN1 PE=1 SV=3	5	5	13	91000000	99000000	35000000	110000000	120000000	42000000	95000000	76750000	0.807895	-0.307761	0.474923	0.323376	81000000	115000000	0.852632	1.21053	-0.230006	0.275634	4	FALSE	TRUE	TRUE	50	411	12.1655	Tnon_mito	OPMD|PAB2|PABII|PABP-2|PABP2|Q86U42	ENSG00000100836
CORO1B	Coronin-1B OS=Homo sapiens GN=CORO1B PE=1 SV=1	3	3	7	25000000			27000000	13000000	9300000	12500000	12325000	0.986	-0.0203404	0.991362	0.00376792	11150000	20000000	0.892	1.6	-0.164884	0.678072	3	FALSE	TRUE	TRUE	38	411	9.24574	Tnon_mito	CORONIN-2|Q9BR76	ENSG00000172725
LRWD1	Leucine-rich repeat and WD repeat-containing protein 1 OS=Homo sapiens GN=LRWD1 PE=1 SV=2	1	1	3			16000000	16000000		16000000	0	12000000	100	6.64386	0.0576689	1.23906	8000000	8000000	100	100	6.64386	6.64386	3	FALSE	FALSE	FALSE	34	411	8.27251	Tnon_mito	CENP-33|ORCA|Q9UFC0	ENSG00000161036
SH3GL1	Endophilin-A2 OS=Homo sapiens GN=SH3GL1 PE=1 SV=1	2	2	6			30000000	34000000	15000000	23000000	0	25500000	100	6.64386	0.00880906	2.05507	19000000	24500000	100	100	6.64386	6.64386	4	TRUE	FALSE	TRUE	26	411	6.32603	Tnon_mito	CNSA1|EEN|SH3D2B|SH3P8|Q99961	ENSG00000141985
TPT1	Translationally-controlled tumor protein OS=Homo sapiens GN=TPT1 PE=1 SV=1	5	5	20	120000000	150000000	130000000	130000000	61000000	83000000	135000000	101000000	0.748148	-0.418604	0.223739	0.650259	72000000	95500000	0.533333	0.707407	-0.906891	-0.499387	4	FALSE	TRUE	TRUE	22	411	5.3528	Tnon_mito	HRF|TCTP|p02|p23|P13693	ENSG00000133112
ACTN4	Alpha-actinin-4 OS=Homo sapiens GN=ACTN4 PE=1 SV=2	25	41	247	180000000	170000000	240000000	270000000	130000000	130000000	175000000	192500000	1.1	0.137504	0.666969	0.175894	130000000	200000000	0.742857	1.14286	-0.428843	0.192645	4	FALSE	TRUE	TRUE	141	411	34.3066	Tnon_mito	ACTININ-4|FSGS|FSGS1|O43707	ENSG00000130402
ARF6	ADP-ribosylation factor 6 OS=Homo sapiens GN=ARF6 PE=1 SV=2	2	2	4	27000000					20000000	13500000	5000000	0.37037	-1.43296	0.641728	0.192649	10000000	0	0.740741	0	-0.432959		1	FALSE	FALSE	FALSE	6	411	1.45985	Tnon_mito	P62330	ENSG00000165527
CAMK2B	Calcium/calmodulin-dependent protein kinase type II subunit beta OS=Homo sapiens GN=CAMK2B PE=1 SV=3	1	2	4	16000000	14000000					15000000	0	0		0.0423786	1.37285	0	0	0	0			0	TRUE	FALSE	FALSE	7	411	1.70316	Tnon_mito	CAM2|CAMK2|CAMKB|Q13554	ENSG00000058404
CDC42	Cell division control protein 42 homolog OS=Homo sapiens GN=CDC42 PE=1 SV=2	4	5	37	92000000	88000000	73000000	81000000	73000000	64000000	90000000	72750000	0.808333	-0.306978	0.0126048	1.89946	68500000	77000000	0.761111	0.855556	-0.393821	-0.225067	4	TRUE	TRUE	TRUE	80	411	19.4647	Tnon_mito	CDC42Hs|G25K|P60953	ENSG00000070831
DYNC1H1	Cytoplasmic dynein 1 heavy chain 1 OS=Homo sapiens GN=DYNC1H1 PE=1 SV=5	90	90	343	150000000	190000000	89000000	140000000	140000000	87000000	170000000	114000000	0.670588	-0.576501	0.14231	0.846765	113500000	140000000	0.667647	0.823529	-0.582842	-0.280108	4	FALSE	TRUE	TRUE	131	411	31.8735	Tnon_mito	DHC1|DHC1a|DNCH1|DNCL|DNECL|DYHC|Dnchc1|HL-3|SMALED1|p22|Q14204	ENSG00000197102
EPHX1	Epoxide hydrolase 1 OS=Homo sapiens GN=EPHX1 PE=1 SV=1	9	9	46	94000000	99000000	130000000	170000000	140000000	140000000	96500000	145000000	1.50259	0.587452	0.00870214	2.06037	140000000	155000000	1.45078	1.60622	0.536826	0.683667	4	TRUE	TRUE	TRUE	6	411	1.45985	Tnon_mito	EPHX|EPOX|HYL1|MEH|P07099	ENSG00000143819
FABP5	Fatty acid-binding protein, epidermal OS=Homo sapiens GN=FABP5 PE=1 SV=3	5	5	18	100000000	77000000	43000000	50000000	39000000	60000000	88500000	48000000	0.542373	-0.882643	0.136832	0.863813	49500000	44500000	0.559322	0.502825	-0.838249	-0.991872	4	FALSE	TRUE	TRUE	38	411	9.24574	Tnon_mito	E-FABP|EFABP|KFABP|PA-FABP|PAFABP|Q01469	ENSG00000164687
GNB2	Guanine nucleotide-binding protein G(I)/G(S)/G(T) subunit beta-2 OS=Homo sapiens GN=GNB2 PE=1 SV=3	2	4	8			25000000	35000000	28000000	40000000	0	32000000	100	6.64386	0.00252222	2.59822	34000000	31500000	100	100	6.64386	6.64386	4	TRUE	TRUE	TRUE	63	411	15.3285	Tnon_mito	P62879	ENSG00000172354
GOT1	Aspartate aminotransferase, cytoplasmic OS=Homo sapiens GN=GOT1 PE=1 SV=3	6	6	13	60000000	42000000	16000000		9500000	15000000	51000000	10125000	0.198529	-2.33258	0.0985082	1.00653	12250000	4750000	0.240196	0.0931373	-2.05772	-3.4245	3	FALSE	TRUE	TRUE	11	411	2.6764	Tpossible_mito	ASTQTL1|GIG18|cAspAT|cCAT|P17174	ENSG00000120053
GSTM2	Glutathione S-transferase Mu 2 OS=Homo sapiens GN=GSTM2 PE=2 SV=1	1	2	7		44000000					22000000	0	0		0.5	0.30103	0	0	0	0			0	FALSE	FALSE	TRUE	8	411	1.94647	Tnon_mito	GST4|GSTM|GSTM2-2|GTHMUS|P28161	ENSG00000213366
GSTM3	Glutathione S-transferase Mu 3 OS=Homo sapiens GN=GSTM3 PE=1 SV=3	4	5	17	29000000	29000000	8900000	8100000	16000000		29000000	8250000	0.284483	-1.81359	0.00793881	2.10024	8000000	12050000	0.275862	0.415517	-1.85798	-1.26702	3	TRUE	TRUE	TRUE	19	411	4.62287	Tnon_mito	GST5|GSTB|GSTM3-3|GTM3|P21266	ENSG00000134202
MYL6	Myosin light polypeptide 6 OS=Homo sapiens GN=MYL6 PE=4 SV=1	9	9	64	310000000	230000000	190000000	230000000	160000000	210000000	270000000	197500000	0.731481	-0.451107	0.294639	0.53071	185000000	195000000	0.685185	0.722222	-0.545434	-0.469485	4	FALSE	TRUE	TRUE	190	411	46.2287	Tnon_mito	ESMLC|LC17|LC17-GI|LC17-NM|LC17A|LC17B|MLC-3|MLC1SM|MLC3NM|MLC3SM|P60660	ENSG00000092841
PPIB	Peptidyl-prolyl cis-trans isomerase B OS=Homo sapiens GN=PPIB PE=1 SV=2	8	8	55	430000000	180000000	210000000	300000000	170000000	270000000	305000000	237500000	0.778689	-0.360882	0.684607	0.164559	220000000	235000000	0.721311	0.770492	-0.471306	-0.376148	4	FALSE	TRUE	TRUE	119	411	28.9538	Tnon_mito	CYP-S1|CYPB|HEL-S-39|OI9|SCYLP|P23284	ENSG00000166794
RAB6A	Ras-related protein Rab-6A OS=Homo sapiens GN=RAB6A PE=1 SV=3	2	3	90		42000000	37000000	39000000	24000000	71000000	21000000	42750000	2.03571	1.02554	0.476664	0.321787	47500000	31500000	2.2619	1.5	1.17754	0.584963	4	FALSE	TRUE	TRUE	41	411	9.97567	Tnon_mito	RAB6|P20340	ENSG00000175582
RAC1	Ras-related C3 botulinum toxin substrate 1 OS=Homo sapiens GN=RAC1 PE=1 SV=1	3	4	16	61000000	70000000	69000000	70000000	66000000	51000000	65500000	64000000	0.977099	-0.033423	0.827544	0.0822091	58500000	68000000	0.89313	1.03817	-0.163058	0.0540398	4	FALSE	TRUE	TRUE	15	411	3.64964	Tnon_mito	Rac-1|TC-25|p21-Rac1|P63000	ENSG00000136238
RALA	Ras-related protein Ral-A OS=Homo sapiens GN=RALA PE=1 SV=1	2	2	4	33000000	19000000	25000000			18000000	26000000	10750000	0.413462	-1.27417	0.214683	0.668201	9000000	0	0.346154	0	-1.53051		2	FALSE	FALSE	FALSE	14	411	3.40633	Tnon_mito	RAL|P11233	ENSG00000006451
RPL7	60S ribosomal protein L7 OS=Homo sapiens GN=RPL7 PE=1 SV=1	14	14	135	1300000000	1100000000	920000000	1000000000	820000000	1000000000	1200000000	935000000	0.779167	-0.359996	0.188534	0.72461	910000000	910000000	0.758333	0.758333	-0.399096	-0.399096	4	FALSE	TRUE	TRUE	175	411	42.5791	Tnon_mito	L7|humL7-1|P18124	ENSG00000147604
RPL27	60S ribosomal protein L27 OS=Homo sapiens GN=RPL27 PE=1 SV=2	4	4	49	550000000	530000000	360000000	270000000	420000000	280000000	540000000	332500000	0.615741	-0.699605	0.00763255	2.11733	350000000	345000000	0.648148	0.638889	-0.625604	-0.646363	4	TRUE	TRUE	TRUE	159	411	38.6861	Tnon_mito	L27|P61353	ENSG00000131469
RPLP0	60S acidic ribosomal protein P0 OS=Homo sapiens GN=RPLP0 PE=1 SV=1	12	12	200	1300000000	710000000	710000000	860000000	780000000	970000000	1005000000	830000000	0.825871	-0.276012	0.658646	0.181348	875000000	820000000	0.870647	0.81592	-0.199841	-0.2935	4	FALSE	TRUE	TRUE	206	411	50.1217	Tnon_mito	L10E|LP0|P0|PRLP0|RPP0|P05388	ENSG00000089157
RPS4X	40S ribosomal protein S4, X isoform OS=Homo sapiens GN=RPS4X PE=1 SV=2	13	13	183	820000000	660000000	400000000	640000000	380000000	500000000	740000000	480000000	0.648649	-0.624491	0.110392	0.95706	440000000	510000000	0.594595	0.689189	-0.750022	-0.537028	4	FALSE	TRUE	TRUE	225	411	54.7445	Tnon_mito	CCG2|DXS306|RPS4|S4|SCAR|SCR10|P62701	ENSG00000198034
S100A11	Protein S100-A11 OS=Homo sapiens GN=S100A11 PE=1 SV=2	1	1	5	17000000	26000000	13000000	13000000		6600000	21500000	8150000	0.37907	-1.39946	0.133025	0.876065	3300000	6500000	0.153488	0.302326	-2.7038	-1.72583	3	FALSE	FALSE	TRUE	39	411	9.48905	Tnon_mito	HEL-S-43|MLN70|S100C|P31949	ENSG00000163191
SLC3A2	Isoform 4 of 4F2 cell-surface antigen heavy chain OS=Homo sapiens GN=SLC3A2	7	7	27	44000000	37000000	36000000	56000000	40000000	34000000	40500000	41500000	1.02469	0.0351894	0.877917	0.0565463	37000000	48000000	0.91358	1.18519	-0.130397	0.245112	4	FALSE	TRUE	TRUE	58	411	14.1119	Tnon_mito	4F2|4F2HC|4T2HC|CD98|CD98HC|MDU1|NACAE|P08195	ENSG00000168003
SPTAN1	Spectrin alpha chain, non-erythrocytic 1 OS=Homo sapiens GN=SPTAN1 PE=1 SV=3	55	55	178	83000000	130000000	64000000	88000000	61000000	78000000	106500000	72750000	0.683099	-0.549834	0.37544	0.42546	69500000	74500000	0.652582	0.699531	-0.615769	-0.515541	4	FALSE	TRUE	TRUE	161	411	39.1727	Tnon_mito	EIEE5|NEAS|SPTA2|Q13813	ENSG00000197694
DYNLL1	Dynein light chain 1, cytoplasmic OS=Homo sapiens GN=DYNLL1 PE=1 SV=1	4	4	28	140000000	150000000	120000000	140000000	120000000	110000000	145000000	122500000	0.844828	-0.243271	0.0544435	1.26405	115000000	130000000	0.793103	0.896552	-0.334419	-0.157541	4	FALSE	TRUE	TRUE	64	411	15.5718	Tpossible_mito	DLC1|DLC8|DNCL1|DNCLC1|LC8|LC8a|PIN|hdlc1|P63167	ENSG00000088986
SYNJ1	Synaptojanin-1 OS=Homo sapiens GN=SYNJ1 PE=2 SV=1	1	1	1						84000000	0	21000000	100	6.64386	0.391002	0.407821	42000000	0	100	0	6.64386		1	FALSE	FALSE	FALSE	12	411	2.91971	Tnon_mito	INPP5G|PARK20|O43426	ENSG00000159082
HACL1	2-hydroxyacyl-CoA lyase 1 OS=Homo sapiens GN=HACL1 PE=1 SV=2	1	1	2					5100000	4500000	0	2400000	100	6.64386	0.182931	0.737712	4800000	2550000	100	100	6.64386	6.64386	2	FALSE	FALSE	FALSE	2	411	0.486618	Tnon_mito	2-HPCL|HPCL|HPCL2|PHYH2|Q9UJ83	ENSG00000131373
AGK	Acylglycerol kinase, mitochondrial OS=Homo sapiens GN=AGK PE=1 SV=2	1	1	2			37000000		17000000		0	13500000	100	6.64386	0.222505	0.65266	8500000	8500000	100	100	6.64386	6.64386	2	FALSE	FALSE	FALSE	16	411	3.89294	Tmito	CATC5|CTRCT38|MTDPS10|MULK|Q53H12	ENSG00000006530
AP1G1	AP-1 complex subunit gamma-1 OS=Homo sapiens GN=AP1G1 PE=2 SV=1	3	3	9	35000000	32000000	33000000	32000000		29000000	33500000	23500000	0.701493	-0.5115	0.295744	0.529084	14500000	16000000	0.432836	0.477612	-1.20811	-1.06609	3	FALSE	TRUE	TRUE	4	411	0.973236	Tnon_mito	ADTG|CLAPG1|O43747	ENSG00000166747
FARSB	Phenylalanine--tRNA ligase beta subunit OS=Homo sapiens GN=FARSB PE=1 SV=3	14	14	55	130000000	160000000	110000000	160000000	98000000	83000000	145000000	112750000	0.777586	-0.362925	0.237924	0.623562	90500000	129000000	0.624138	0.889655	-0.680063	-0.168682	4	FALSE	TRUE	TRUE	39	411	9.48905	Tnon_mito	FARSLB|FRSB|PheHB|PheRS|Q9NSD9	ENSG00000116120
TRIM28	Transcription intermediary factor 1-beta OS=Homo sapiens GN=TRIM28 PE=1 SV=5	20	20	177	370000000	260000000	260000000	410000000	190000000	210000000	315000000	267500000	0.849206	-0.235813	0.571937	0.242652	200000000	300000000	0.634921	0.952381	-0.655352	-0.0703893	4	FALSE	TRUE	TRUE	177	411	43.0657	Tnon_mito	KAP1|RNF96|TF1B|TIF1B|Q13263	ENSG00000130726
STIM2	Stromal interaction molecule 2 OS=Homo sapiens GN=STIM2 PE=2 SV=1	1	1	6	8300000	7900000	8800000	9900000	7000000	9300000	8100000	8750000	1.08025	0.111361	0.384894	0.414659	8150000	8450000	1.00617	1.04321	0.00887815	0.0610294	4	FALSE	FALSE	TRUE	3	411	0.729927	Tnon_mito	Q9P246	ENSG00000109689
MED29	Mediator of RNA polymerase II transcription subunit 29 OS=Homo sapiens GN=MED29 PE=1 SV=1	1	1	6	15000000	19000000	24000000	11000000	20000000	25000000	17000000	20000000	1.17647	0.234465	0.470287	0.327637	22500000	15500000	1.32353	0.911765	0.40439	-0.133267	4	FALSE	FALSE	TRUE	0	411	0	Tnon_mito	IXL|Q9NX70	ENSG00000063322
CSTF2	Cleavage stimulation factor subunit 2 OS=Homo sapiens GN=CSTF2 PE=2 SV=1	3	3	6	52000000	37000000	30000000	60000000	33000000		44500000	30750000	0.691011	-0.533219	0.393283	0.405294	16500000	46500000	0.370787	1.04494	-1.43134	0.0634254	3	FALSE	TRUE	TRUE	60	411	14.5985	Tnon_mito	CstF-64|P33240	ENSG00000101811
ILF3	Interleukin enhancer-binding factor 3 OS=Homo sapiens GN=ILF3 PE=1 SV=3	24	24	184	290000000	250000000	240000000	260000000	210000000	230000000	270000000	235000000	0.87037	-0.200299	0.291839	0.534856	220000000	235000000	0.814815	0.87037	-0.295456	-0.200299	4	FALSE	TRUE	TRUE	158	411	38.4428	Tpossible_mito	CBTF|DRBF|DRBP76|MMP4|MPHOSPH4|MPP4|NF-AT-90|NF110|NF110b|NF90|NF90a|NF90b|NFAR|NFAR-1|NFAR2|TCP110|TCP80|Q12906	ENSG00000129351
MCL1	Induced myeloid leukemia cell differentiation protein Mcl-1 OS=Homo sapiens GN=MCL1 PE=1 SV=3	1	1	1				20000000			0	5000000	100	6.64386	0.391002	0.407821	0	10000000	0	100		6.64386	1	FALSE	FALSE	FALSE	1	411	0.243309	Tpossible_mito	BCL2L3|EAT|MCL1-ES|MCL1L|MCL1S|Mcl-1|TM|bcl2-L-3|mcl1/EAT|Q07820	ENSG00000143384
PLS3	Plastin-3 OS=Homo sapiens GN=PLS3 PE=1 SV=4	21	26	164	460000000	350000000	250000000	350000000	230000000	230000000	405000000	265000000	0.654321	-0.61193	0.185348	0.732011	230000000	290000000	0.567901	0.716049	-0.816288	-0.481869	4	FALSE	TRUE	TRUE	41	411	9.97567	Tnon_mito	BMND18|T-plastin|P13797	ENSG00000102024
TJP1	Tight junction protein 1 (Zona occludens 1), isoform CRA_a OS=Homo sapiens GN=TJP1 PE=4 SV=1	2	2	4	7800000		7000000	6900000	6100000		3900000	5000000	1.28205	0.358454	0.828707	0.081599	3050000	6500000	0.782051	1.66667	-0.354665	0.736966	3	FALSE	FALSE	FALSE	35	411	8.51582	Tnon_mito	ZO-1|Q07157	ENSG00000104067
TRIO	Triple functional domain protein OS=Homo sapiens GN=TRIO PE=1 SV=2	1	1	2		5600000		4000000			2800000	1000000	0.357143	-1.48543	0.635363	0.196978	0	2000000	0	0.714286		-0.485427	1	FALSE	FALSE	FALSE	15	411	3.64964	Tnon_mito	ARHGEF23|tgat|O75962	ENSG00000038382
UTRN	Isoform 2 of Utrophin OS=Homo sapiens GN=UTRN	5	5	6	12000000	13000000	15000000	20000000			12500000	8750000	0.7	-0.514573	0.520427	0.283641	0	10000000	0	0.8		-0.321928	2	FALSE	TRUE	TRUE	27	411	6.56934	Tnon_mito	DMDL|DRP|DRP1|P46939	ENSG00000152818
MAP4K4	Mitogen-activated protein kinase kinase kinase kinase 4 OS=Homo sapiens GN=MAP4K4 PE=4 SV=1	2	2	3			31000000	7800000		36000000	0	18700000	100	6.64386	0.122227	0.912833	18000000	3900000	100	100	6.64386	6.64386	3	FALSE	FALSE	FALSE	16	411	3.89294	Tnon_mito	FLH21957|HEL-S-31|HGK|MEKKK4|NIK|O95819	ENSG00000071054
PI4K2A	Phosphatidylinositol 4-kinase type 2-alpha OS=Homo sapiens GN=PI4K2A PE=1 SV=1	3	3	3			16000000	4900000		10000000	0	7725000	100	6.64386	0.10982	0.959318	5000000	2450000	100	100	6.64386	6.64386	3	FALSE	TRUE	FALSE	0	411	0	Tpossible_mito	PI4KII|PIK42A|RP11-548K23.6|Q9BTU6	ENSG00000155252
ARPC3	Actin-related protein 2/3 complex subunit 3 OS=Homo sapiens GN=ARPC3 PE=1 SV=3	2	2	7	34000000		50000000		11000000	45000000	17000000	26500000	1.55882	0.640458	0.693092	0.159209	28000000	5500000	1.64706	0.323529	0.719892	-1.62803	3	FALSE	FALSE	TRUE	15	411	3.64964	Tnon_mito	ARC21|p21-Arc|O15145	ENSG00000111229
TWF2	Twinfilin-2 OS=Homo sapiens GN=TWF2 PE=1 SV=2	3	3	4	19000000	54000000			8100000		36500000	2025000	0.0554795	-4.1719	0.295664	0.529202	4050000	4050000	0.110959	0.110959	-3.1719	-3.1719	1	FALSE	TRUE	FALSE	7	411	1.70316	Tnon_mito	A6RP|A6r|PTK9L|Q6IBS0	ENSG00000247596
ACAT2	Acetyl-CoA acetyltransferase, cytosolic OS=Homo sapiens GN=ACAT2 PE=1 SV=2	5	5	15	63000000	110000000	41000000	88000000	28000000	32000000	86500000	47250000	0.546243	-0.872386	0.303429	0.517943	30000000	58000000	0.346821	0.67052	-1.52774	-0.576647	4	FALSE	TRUE	TRUE	18	411	4.37956	Tpossible_mito	Q9BWD1	ENSG00000120437
DDX6	Probable ATP-dependent RNA helicase DDX6 OS=Homo sapiens GN=DDX6 PE=1 SV=2	17	17	89	160000000	160000000	100000000	200000000	160000000	160000000	160000000	155000000	0.96875	-0.0458037	0.824001	0.0840723	160000000	180000000	1	1.125	0	0.169925	4	FALSE	TRUE	TRUE	129	411	31.3869	Tnon_mito	HLR2|P54|RCK|P26196	ENSG00000110367
DDX10	Probable ATP-dependent RNA helicase DDX10 OS=Homo sapiens GN=DDX10 PE=1 SV=2	1	1	1				94000			0	23500	100	6.64386	0.391002	0.407821	0	47000	0	100		6.64386	1	FALSE	FALSE	FALSE	30	411	7.29927	Tnon_mito	HRH-J8|Q13206	ENSG00000178105
DKC1	H/ACA ribonucleoprotein complex subunit 4 OS=Homo sapiens GN=DKC1 PE=1 SV=3	1	1	2			10000000		8100000		0	4525000	100	6.64386	0.185178	0.73241	4050000	4050000	100	100	6.64386	6.64386	2	FALSE	FALSE	FALSE	74	411	18.0049	Tnon_mito	CBF5|DKC|DKCX|NAP57|NOLA4|XAP101|O60832	ENSG00000130826
EIF2S3	Eukaryotic translation initiation factor 2 subunit 3 OS=Homo sapiens GN=EIF2S3 PE=1 SV=3	16	16	113	300000000	240000000	220000000	320000000	230000000	220000000	270000000	247500000	0.916667	-0.125531	0.610133	0.214575	225000000	275000000	0.833333	1.01852	-0.263034	0.0264722	4	FALSE	TRUE	TRUE	91	411	22.1411	Tnon_mito	EIF2|EIF2G|EIF2gamma|eIF-2gA|P41091	ENSG00000130741
EIF4A2	Isoform 2 of Eukaryotic initiation factor 4A-II OS=Homo sapiens GN=EIF4A2	3	12	96	90000000	82000000	57000000	54000000	50000000	48000000	86000000	52250000	0.607558	-0.718906	0.0338148	1.47089	49000000	52000000	0.569767	0.604651	-0.811555	-0.725825	4	TRUE	TRUE	TRUE	178	411	43.309	Tnon_mito	BM-010|DDX2B|EIF4A|EIF4F|eIF-4A-II|eIF4A-II|Q14240	ENSG00000156976
GNL1	Guanine nucleotide-binding protein-like 1 OS=Homo sapiens GN=GNL1 PE=1 SV=2	1	1	1		10000000					5000000	0	0		0.5	0.30103	0	0	0	0			0	FALSE	FALSE	FALSE	2	411	0.486618	Tnon_mito	HSR1|P36915	ENSG00000204590
DNAJB1	DnaJ homolog subfamily B member 1 OS=Homo sapiens GN=DNAJB1 PE=1 SV=4	5	5	12	56000000	50000000	34000000	34000000	25000000	39000000	53000000	33000000	0.622642	-0.683526	0.0185757	1.73105	32000000	29500000	0.603774	0.556604	-0.72792	-0.845277	4	TRUE	TRUE	TRUE	39	411	9.48905	Tnon_mito	HSPF1|Hdj1|Hsp40|RSPH16B|Sis1|P25685	ENSG00000132002
DRG1	Developmentally-regulated GTP-binding protein 1 OS=Homo sapiens GN=DRG1 PE=1 SV=1	15	15	76	110000000	110000000	77000000	110000000	78000000	78000000	110000000	85750000	0.779545	-0.359295	0.0577275	1.23862	78000000	94000000	0.709091	0.854545	-0.495957	-0.226771	4	FALSE	TRUE	TRUE	53	411	12.8954	Tnon_mito	NEDD3|Q9Y295	ENSG00000185721
EXOSC9	Isoform 2 of Exosome complex component RRP45 OS=Homo sapiens GN=EXOSC9	3	3	3	28000000	18000000					23000000	0	0		0.136275	0.865583	0	0	0	0			0	FALSE	TRUE	FALSE	62	411	15.0852	Tnon_mito	PM/Scl-75|PMSCL1|RRP45|Rrp45p|p5|p6|Q06265	ENSG00000123737
MAP2K1	Dual specificity mitogen-activated protein kinase kinase 1 OS=Homo sapiens GN=MAP2K1 PE=1 SV=2	1	2	3	42000000						21000000	0	0		0.5	0.30103	0	0	0	0			0	FALSE	FALSE	FALSE	6	411	1.45985	Tpossible_mito	CFC3|MAPKK1|MEK1|MKK1|PRKMK1|Q02750	ENSG00000169032
MAP2K7	Isoform 2 of Dual specificity mitogen-activated protein kinase kinase 7 OS=Homo sapiens GN=MAP2K7	1	1	2		12000000					6000000	0	0		0.5	0.30103	0	0	0	0			0	FALSE	FALSE	FALSE	0	411	0	Tnon_mito	Jnkk2|MAPKK7|MKK7|PRKMK7|SAPKK-4|SAPKK4|O14733	ENSG00000076984
PSMC1	26S protease regulatory subunit 4 OS=Homo sapiens GN=PSMC1 PE=1 SV=1	9	10	48	120000000	120000000	64000000	76000000	56000000	67000000	120000000	65750000	0.547917	-0.867972	0.000953553	3.02066	61500000	66000000	0.5125	0.55	-0.964376	-0.862496	4	TRUE	TRUE	TRUE	95	411	23.1144	Tnon_mito	P26S4|S4|p56|P62191	ENSG00000100764
PSMC2	26S protease regulatory subunit 7 OS=Homo sapiens GN=PSMC2 PE=1 SV=3	12	12	43	61000000	70000000	51000000	52000000	43000000	43000000	65500000	47250000	0.721374	-0.471181	0.0937992	1.0278	43000000	47500000	0.656489	0.725191	-0.607158	-0.463567	4	FALSE	TRUE	TRUE	126	411	30.6569	Tpossible_mito	MSS1|Nbla10058|S7|P35998	ENSG00000161057
PSMC5	26S protease regulatory subunit 8 OS=Homo sapiens GN=PSMC5 PE=1 SV=1	10	11	40	84000000	95000000	92000000	130000000	85000000	47000000	89500000	88500000	0.988827	-0.0162102	0.958383	0.0184608	66000000	107500000	0.73743	1.20112	-0.439422	0.264377	4	FALSE	TRUE	TRUE	116	411	28.2238	Tnon_mito	S8|SUG-1|SUG1|TBP10|TRIP1|p45|p45/SUG|P62195	ENSG00000087191
RECQL	ATP-dependent DNA helicase Q1 OS=Homo sapiens GN=RECQL PE=1 SV=3	7	7	16	19000000	57000000	23000000	30000000	33000000	16000000	38000000	25500000	0.671053	-0.575502	0.62859	0.201633	24500000	31500000	0.644737	0.828947	-0.633218	-0.270648	4	FALSE	TRUE	TRUE	23	411	5.59611	Tnon_mito	RECQL1|RecQ1|P46063	ENSG00000004700
RFC2	Replication factor C subunit 2 OS=Homo sapiens GN=RFC2 PE=1 SV=3	5	5	13	59000000	8100000	38000000	69000000	51000000	37000000	33550000	48750000	1.45306	0.539089	0.65667	0.182653	44000000	60000000	1.31148	1.78838	0.391191	0.83865	4	FALSE	TRUE	TRUE	56	411	13.6253	Tnon_mito	RFC40|P35250	ENSG00000049541
RFC3	Replication factor C subunit 3 OS=Homo sapiens GN=RFC3 PE=1 SV=2	7	7	28	48000000	64000000	37000000	25000000	30000000	26000000	56000000	29500000	0.526786	-0.924712	0.156409	0.805738	28000000	27500000	0.5	0.491071	-1	-1.026	4	FALSE	TRUE	TRUE	37	411	9.00243	Tnon_mito	RFC38|P40938	ENSG00000133119
RFC4	Replication factor C subunit 4 OS=Homo sapiens GN=RFC4 PE=1 SV=2	8	8	22	58000000	29000000	33000000	49000000	38000000	40000000	43500000	40000000	0.91954	-0.121015	0.849964	0.0705997	39000000	43500000	0.896552	1	-0.157541	0	4	FALSE	TRUE	TRUE	58	411	14.1119	Tnon_mito	A1|RFC37|P35249	ENSG00000163918
RFC5	Replication factor C subunit 5 OS=Homo sapiens GN=RFC5 PE=1 SV=1	4	4	12	56000000	81000000	40000000	29000000	51000000	43000000	68500000	40750000	0.594891	-0.749304	0.239754	0.620234	47000000	40000000	0.686131	0.583942	-0.543443	-0.776104	4	FALSE	TRUE	TRUE	30	411	7.29927	Tnon_mito	RFC36|P40937	ENSG00000111445
SCD	Acyl-CoA desaturase OS=Homo sapiens GN=SCD PE=1 SV=2	3	3	8		43000000	44000000	60000000	60000000	52000000	21500000	54000000	2.51163	1.32862	0.366027	0.436487	56000000	60000000	2.60465	2.7907	1.38109	1.48063	4	FALSE	TRUE	TRUE	6	411	1.45985	Tnon_mito	FADS5|MSTP008|SCD1|SCDOS|O00767	ENSG00000099194
HSPA13	Heat shock 70 kDa protein 13 OS=Homo sapiens GN=HSPA13 PE=1 SV=1	2	2	2			19000000				0	4750000	100	6.64386	0.391002	0.407821	0	0	0	0			1	FALSE	FALSE	FALSE	1	411	0.243309	Tnon_mito	STCH|P48723	ENSG00000155304
TARBP2	RISC-loading complex subunit TARBP2 OS=Homo sapiens GN=TARBP2 PE=1 SV=3	1	1	7	9500000	8500000	12000000	12000000	9800000	8300000	9000000	10525000	1.16944	0.225823	0.214335	0.668907	9050000	10900000	1.00556	1.21111	0.00799279	0.276331	4	FALSE	FALSE	TRUE	0	411	0	Tnon_mito	LOQS|TRBP|TRBP1|TRBP2|Q15633	ENSG00000139546
DDX39B	Spliceosome RNA helicase DDX39B OS=Homo sapiens GN=DDX39B PE=1 SV=1	7	14	100	160000000	130000000	120000000	140000000	100000000	130000000	145000000	122500000	0.844828	-0.243271	0.3416	0.466483	115000000	120000000	0.793103	0.827586	-0.334419	-0.273018	4	FALSE	TRUE	TRUE	138	411	33.5766	Tnon_mito	BAT1|D6S81E|UAP56|Q13838	ENSG00000198563
SLC7A5	Large neutral amino acids transporter small subunit 1 OS=Homo sapiens GN=SLC7A5 PE=1 SV=2	1	1	2	14000000	10000000					12000000	0	0		0.105137	0.978245	0	0	0	0			0	FALSE	FALSE	FALSE	35	411	8.51582	Tnon_mito	4F2LC|CD98|D16S469E|E16|LAT1|MPE16|hLAT1|Q01650	ENSG00000103257
RUVBL1	RuvB-like 1 OS=Homo sapiens GN=RUVBL1 PE=1 SV=1	14	14	90	180000000	230000000	100000000	200000000	160000000	120000000	205000000	145000000	0.707317	-0.499571	0.182587	0.738529	140000000	180000000	0.682927	0.878049	-0.550197	-0.187627	4	FALSE	TRUE	TRUE	152	411	36.983	Tnon_mito	ECP54|INO80H|NMP238|PONTIN|Pontin52|RVB1|TIH1|TIP49|TIP49A|Q9Y265	ENSG00000175792
TRIP13	Pachytene checkpoint protein 2 homolog OS=Homo sapiens GN=TRIP13 PE=1 SV=2	6	6	15	52000000	49000000	19000000	36000000	28000000	35000000	50500000	29500000	0.584158	-0.775568	0.00916815	2.03772	31500000	32000000	0.623762	0.633663	-0.680932	-0.658211	4	TRUE	TRUE	TRUE	27	411	6.56934	Tnon_mito	16E1BP|Q15645	ENSG00000071539
DDX23	Probable ATP-dependent RNA helicase DDX23 OS=Homo sapiens GN=DDX23 PE=1 SV=3	1	1	1	16000000						8000000	0	0		0.5	0.30103	0	0	0	0			0	FALSE	FALSE	FALSE	63	411	15.3285	Tpossible_mito	PRPF28|SNRNP100|U5-100K|U5-100KD|prp28|Q9BUQ8	ENSG00000174243
ABCG1	Isoform 3 of ATP-binding cassette sub-family G member 1 OS=Homo sapiens GN=ABCG1	1	1	1				220000000			0	55000000	100	6.64386	0.391002	0.407821	0	110000000	0	100		6.64386	1	FALSE	FALSE	FALSE	0	411	0	Tpossible_mito	ABC8|WHITE1|P45844	ENSG00000160179
SNCAIP	Isoform 3 of Synphilin-1 OS=Homo sapiens GN=SNCAIP	1	1	1	12000000						6000000	0	0		0.5	0.30103	0	0	0	0			0	FALSE	FALSE	FALSE	2	411	0.486618	Tnon_mito	SYPH1|Sph1|Q9Y6H5	ENSG00000064692
EIF4A3	Eukaryotic initiation factor 4A-III OS=Homo sapiens GN=EIF4A3 PE=1 SV=4	7	10	48	70000000	81000000	46000000	67000000	57000000	67000000	75500000	59250000	0.784768	-0.349661	0.125965	0.899751	62000000	62000000	0.821192	0.821192	-0.284208	-0.284208	4	FALSE	TRUE	TRUE	147	411	35.7664	Tnon_mito	DDX48|MUK34|NMP265|NUK34|eIF4AIII|P38919	ENSG00000141543
TXNDC9	Thioredoxin domain-containing protein 9 OS=Homo sapiens GN=TXNDC9 PE=1 SV=2	3	3	4	21000000		15000000	14000000			10500000	7250000	0.690476	-0.534336	0.812014	0.0904362	0	7000000	0	0.666667		-0.584963	2	FALSE	TRUE	FALSE	14	411	3.40633	Tnon_mito	APACD|PHLP3|O14530	ENSG00000115514
DDX39A	ATP-dependent RNA helicase DDX39A OS=Homo sapiens GN=DDX39A PE=1 SV=2	4	11	52	49000000	39000000	36000000	34000000	31000000	32000000	44000000	33250000	0.755682	-0.404149	0.264814	0.577059	31500000	32500000	0.715909	0.738636	-0.482152	-0.437064	4	FALSE	TRUE	TRUE	138	411	33.5766	Tnon_mito	BAT1|BAT1L|DDX39|DDXL|URH49|O00148	ENSG00000123136
SPTLC1	Serine palmitoyltransferase 1 OS=Homo sapiens GN=SPTLC1 PE=1 SV=1	8	8	21	92000000	50000000	42000000	72000000	80000000	84000000	71000000	69500000	0.978873	-0.030806	0.956007	0.0195388	82000000	76000000	1.15493	1.07042	0.207805	0.0981804	4	FALSE	TRUE	TRUE	12	411	2.91971	Tnon_mito	HSAN1|HSN1|LBC1|LCB1|SPT1|SPTI|O15269	ENSG00000090054
METAP2	Methionine aminopeptidase 2 OS=Homo sapiens GN=METAP2 PE=2 SV=1	2	4	8				7400000			0	1850000	100	6.64386	0.391002	0.407821	0	3700000	0	100		6.64386	1	FALSE	TRUE	TRUE	4	411	0.973236	Tnon_mito	MAP2|MNPEP|p67|p67eIF2|P50579	ENSG00000111142
METAP2	Methionine aminopeptidase 2 OS=Homo sapiens GN=METAP2 PE=1 SV=1	2	4	19	38000000	32000000	45000000	46000000	28000000	39000000	35000000	39500000	1.12857	0.174498	0.43025	0.36628	33500000	37000000	0.957143	1.05714	-0.0631938	0.0801703	4	FALSE	TRUE	TRUE	4	411	0.973236	Tnon_mito	MAP2|MNPEP|p67|p67eIF2|P50579	ENSG00000111142
DDX20	Probable ATP-dependent RNA helicase DDX20 OS=Homo sapiens GN=DDX20 PE=1 SV=2	7	7	27	49000000	43000000	47000000	56000000	36000000	40000000	46000000	44750000	0.972826	-0.0397462	0.825832	0.0831081	38000000	46000000	0.826087	1	-0.275634	0	4	FALSE	TRUE	TRUE	40	411	9.73236	Tnon_mito	DP103|GEMIN3|Q9UHI6	ENSG00000064703
EXOSC8	Exosome complex component RRP43 OS=Homo sapiens GN=EXOSC8 PE=1 SV=1	3	3	9	46000000	26000000	38000000	39000000	28000000	32000000	36000000	34250000	0.951389	-0.0718929	0.89054	0.0503465	30000000	33500000	0.833333	0.930556	-0.263034	-0.103836	4	FALSE	TRUE	TRUE	43	411	10.4623	Tnon_mito	CIP3|EAP2|OIP2|RP11-421P11.3|RRP43|Rrp43p|bA421P11.3|p9|Q96B26	ENSG00000120699
DNAJC8	DnaJ homolog subfamily C member 8 OS=Homo sapiens GN=DNAJC8 PE=1 SV=2	9	9	25	71000000	77000000	69000000	90000000	41000000	40000000	74000000	60000000	0.810811	-0.302563	0.333841	0.47646	40500000	65500000	0.547297	0.885135	-0.869603	-0.17603	4	FALSE	TRUE	TRUE	51	411	12.4088	Tnon_mito	HSPC331|SPF31|O75937	ENSG00000126698
DICER1	Endoribonuclease Dicer OS=Homo sapiens GN=DICER1 PE=1 SV=3	3	3	7	7000000	6500000	8200000	9900000	7900000	8300000	6750000	8575000	1.27037	0.345249	0.0239128	1.62137	8100000	8900000	1.2	1.31852	0.263034	0.398918	4	TRUE	TRUE	TRUE	13	411	3.16302	Tnon_mito	DCR1|Dicer|HERNA|MNG1|RMSE2|Q9UPY3	ENSG00000100697
DDX58	Probable ATP-dependent RNA helicase DDX58 OS=Homo sapiens GN=DDX58 PE=1 SV=2	1	1	1			20000000				0	5000000	100	6.64386	0.391002	0.407821	0	0	0	0			1	FALSE	FALSE	FALSE	2	411	0.486618	Tnon_mito	RIG-I|RIGI|RLR-1|O95786	ENSG00000107201
RAI14	Isoform 2 of Ankycorbin OS=Homo sapiens GN=RAI14	1	1	1				29000000			0	7250000	100	6.64386	0.391002	0.407821	0	14500000	0	100		6.64386	1	FALSE	FALSE	FALSE	39	411	9.48905	Tpossible_mito	NORPEG|RAI13|Q9P0K7	ENSG00000039560
GNL3	Guanine nucleotide-binding protein-like 3 OS=Homo sapiens GN=GNL3 PE=1 SV=2	7	7	24	27000000	33000000	32000000	70000000	24000000	14000000	30000000	35000000	1.16667	0.222392	0.715465	0.145412	19000000	47000000	0.633333	1.56667	-0.658963	0.647698	4	FALSE	TRUE	TRUE	80	411	19.4647	Tnon_mito	C77032|E2IG3|NNP47|NS|Q9BVP2	ENSG00000163938
DDX25	ATP-dependent RNA helicase DDX25 (Fragment) OS=Homo sapiens GN=DDX25 PE=4 SV=2	1	1	1	210000000						105000000	0	0		0.5	0.30103	0	0	0	0			0	FALSE	FALSE	FALSE	0	411	0	Tnon_mito	GRTH|Q9UHL0	ENSG00000109832
HSPA14	Heat shock 70 kDa protein 14 OS=Homo sapiens GN=HSPA14 PE=1 SV=1	5	5	11	33000000	8900000	24000000	37000000	12000000	12000000	20950000	21250000	1.01432	0.0205126	0.984768	0.00666598	12000000	24500000	0.572792	1.16945	-0.803916	0.225832	4	FALSE	TRUE	TRUE	6	411	1.45985	Tnon_mito	HSP70-4|HSP70L1|Q0VDF9	ENSG00000187522
DDX47	Probable ATP-dependent RNA helicase DDX47 OS=Homo sapiens GN=DDX47 PE=1 SV=1	1	1	2			16000000	17000000			0	8250000	100	6.64386	0.181982	0.739971	0	8500000	0	100		6.64386	2	FALSE	FALSE	FALSE	45	411	10.9489	Tnon_mito	E4-DBP|HQ0256|MSTP162|RRP3|Q9H0S4	ENSG00000213782
ANKHD1	Isoform 6 of Ankyrin repeat and KH domain-containing protein 1 OS=Homo sapiens GN=ANKHD1	2	5	13	4400000	13000000	8200000	14000000		5000000	8700000	6800000	0.781609	-0.355481	0.750048	0.124911	2500000	7000000	0.287356	0.804598	-1.79909	-0.31366	3	FALSE	TRUE	TRUE	35	411	8.51582	Tnon_mito	MASK|VBARP	ENSG00000131503
DDX19A	ATP-dependent RNA helicase DDX19A OS=Homo sapiens GN=DDX19A PE=1 SV=1	6	6	17	36000000	36000000	21000000	23000000	19000000	21000000	36000000	21000000	0.583333	-0.777608	0.000351922	3.45355	20000000	21000000	0.555556	0.583333	-0.847997	-0.777608	4	TRUE	TRUE	TRUE	19	411	4.62287	Tnon_mito	DDX19-DDX19L|DDX19L|Q9NUU7	ENSG00000168872
ABCF3	ATP-binding cassette sub-family F member 3 OS=Homo sapiens GN=ABCF3 PE=1 SV=2	1	1	2				13000000		17000000	0	7500000	100	6.64386	0.187299	0.727465	8500000	6500000	100	100	6.64386	6.64386	2	FALSE	FALSE	FALSE	3	411	0.729927	Tnon_mito	EST201864|Q9NUQ8	ENSG00000161204
EXOSC5	Exosome complex component RRP46 OS=Homo sapiens GN=EXOSC5 PE=1 SV=1	3	3	11		47000000	41000000	73000000	31000000	37000000	23500000	45500000	1.93617	0.953206	0.512904	0.289964	34000000	52000000	1.44681	2.21277	0.532874	1.14585	4	FALSE	TRUE	TRUE	17	411	4.13625	Tnon_mito	RRP41B|RRP46|Rrp46p|hRrp46p|p12B|Q9NQT4	ENSG00000077348
KIDINS220	Kinase D-interacting substrate of 220 kDa OS=Homo sapiens GN=KIDINS220 PE=1 SV=3	1	1	1					57000000		0	14250000	100	6.64386	0.391002	0.407821	28500000	28500000	100	100	6.64386	6.64386	1	FALSE	FALSE	FALSE	18	411	4.37956	Tnon_mito	ARMS|Q9ULH0	ENSG00000134313
NXN	Nucleoredoxin OS=Homo sapiens GN=NXN PE=1 SV=2	1	1	2	24000000	23000000					23500000	0	0		0.0135431	1.86828	0	0	0	0			0	TRUE	FALSE	FALSE	5	411	1.21655	Tnon_mito	NRX|TRG-4|Q6DKJ4	ENSG00000167693
DDX50	ATP-dependent RNA helicase DDX50 OS=Homo sapiens GN=DDX50 PE=1 SV=1	4	5	17	15000000	13000000		11000000	11000000	11000000	14000000	8250000	0.589286	-0.762961	0.127536	0.894367	11000000	11000000	0.785714	0.785714	-0.347923	-0.347923	3	FALSE	TRUE	TRUE	119	411	28.9538	Tnon_mito	GU2|GUB|RH-II/GuB|mcdrh|Q9BQ39	ENSG00000107625
DDX54	Isoform 2 of ATP-dependent RNA helicase DDX54 OS=Homo sapiens GN=DDX54	1	1	3			12000000	12000000	8900000		0	8225000	100	6.64386	0.0625623	1.20369	4450000	10450000	100	100	6.64386	6.64386	3	FALSE	FALSE	FALSE	49	411	11.9221	Tnon_mito	DP97|Q8TDD1	ENSG00000123064
TMX1	Thioredoxin-related transmembrane protein 1 OS=Homo sapiens GN=TMX1 PE=1 SV=1	10	10	61	170000000	190000000	260000000	280000000	210000000	190000000	180000000	235000000	1.30556	0.384664	0.078875	1.10306	200000000	245000000	1.11111	1.36111	0.152003	0.444785	4	FALSE	TRUE	TRUE	23	411	5.59611	Tnon_mito	PDIA11|TMX|TXNDC|TXNDC1|Q9H3N1	ENSG00000139921
SHANK3	SH3 and multiple ankyrin repeat domains protein 3 OS=Homo sapiens GN=SHANK3 PE=2 SV=1	1	1	1	23000000						11500000	0	0		0.5	0.30103	0	0	0	0			0	FALSE	FALSE	FALSE				Tnon_mito	DEL22q13.3|PROSAP2|PSAP2|SCZD15|SPANK-2|Q9BYB0	ENSG00000251322
IGF2R	Cation-independent mannose-6-phosphate receptor OS=Homo sapiens GN=IGF2R PE=1 SV=3	21	21	43	34000000	27000000	22000000	36000000	28000000	33000000	30500000	29750000	0.97541	-0.0359196	0.883582	0.0537531	30500000	32000000	1	1.04918	0	0.0692627	4	FALSE	TRUE	TRUE	20	411	4.86618	Tnon_mito	CD222|CIMPR|M6P-R|MPR1|MPRI|P11717	ENSG00000197081
TRAPPC3	Trafficking protein particle complex subunit 3 OS=Homo sapiens GN=TRAPPC3 PE=1 SV=1	1	1	5	39000000	36000000	32000000	25000000		23000000	37500000	20000000	0.533333	-0.906891	0.0835896	1.07785	11500000	12500000	0.306667	0.333333	-1.70526	-1.58496	3	FALSE	FALSE	TRUE	10	411	2.43309	Tnon_mito	BET3|O43617	ENSG00000054116
BNIP1	Vesicle transport protein SEC20 OS=Homo sapiens GN=BNIP1 PE=1 SV=3	1	1	1			4200000				0	1050000	100	6.64386	0.391002	0.407821	0	0	0	0			1	FALSE	FALSE	FALSE	1	411	0.243309	Tpossible_mito	NIP1|SEC20|TRG-8|Q12981	ENSG00000113734
UBE2K	Ubiquitin-conjugating enzyme E2 K OS=Homo sapiens GN=UBE2K PE=1 SV=3	3	3	7	37000000		21000000	24000000	23000000		18500000	17000000	0.918919	-0.121991	0.949138	0.0226705	11500000	23500000	0.621622	1.27027	-0.685891	0.345135	3	FALSE	TRUE	TRUE	12	411	2.91971	Tnon_mito	E2-25K|HIP2|HYPG|LIG|UBC1|P61086	ENSG00000078140
PFAS	Phosphoribosylformylglycinamidine synthase OS=Homo sapiens GN=PFAS PE=1 SV=4	10	10	30	74000000	110000000	30000000	18000000	19000000		92000000	16750000	0.182065	-2.45747	0.118721	0.925473	9500000	18500000	0.103261	0.201087	-3.27563	-2.31411	3	FALSE	TRUE	TRUE	40	411	9.73236	Tnon_mito	FGAMS|FGARAT|PURL|O15067	ENSG00000178921
PFDN4	Prefoldin subunit 4 OS=Homo sapiens GN=PFDN4 PE=2 SV=1	1	1	1					22000000		0	5500000	100	6.64386	0.391002	0.407821	11000000	11000000	100	100	6.64386	6.64386	1	FALSE	FALSE	FALSE	24	411	5.83942	Tpossible_mito	C1|PFD4|Q9NQP4	ENSG00000101132
STAU1	Double-stranded RNA-binding protein Staufen homolog 1 OS=Homo sapiens GN=STAU1 PE=1 SV=2	10	10	45	100000000	78000000	75000000	96000000	66000000	100000000	89000000	84250000	0.946629	-0.0791286	0.759529	0.119455	83000000	81000000	0.932584	0.910112	-0.100694	-0.135883	4	FALSE	TRUE	TRUE	58	411	14.1119	Tnon_mito	STAU|O95793	ENSG00000124214
UCK2	Uridine-cytidine kinase 2 OS=Homo sapiens GN=UCK2 PE=1 SV=1	1	1	1	17000000						8500000	0	0		0.5	0.30103	0	0	0	0			0	FALSE	FALSE	FALSE	5	411	1.21655	Tnon_mito	TSA903|UK|UMPK|Q9BZX2	ENSG00000143179
YARS	Tyrosine--tRNA ligase, cytoplasmic OS=Homo sapiens GN=YARS PE=1 SV=4	13	13	31	78000000	380000000	32000000	34000000	25000000	30000000	229000000	30250000	0.132096	-2.92034	0.413591	0.383429	27500000	29500000	0.120087	0.128821	-3.05784	-2.95656	4	FALSE	TRUE	TRUE	71	411	17.2749	Tnon_mito	CMTDIC|TYRRS|YRS|YTS|P54577	ENSG00000134684
EIF3I	Eukaryotic translation initiation factor 3 subunit I OS=Homo sapiens GN=EIF3I PE=1 SV=1	16	16	127	360000000	290000000	390000000	400000000	340000000	330000000	325000000	365000000	1.12308	0.167457	0.441002	0.355559	335000000	370000000	1.03077	1.13846	0.0437214	0.187086	4	FALSE	TRUE	TRUE	128	411	31.1436	Tnon_mito	EIF3S2|PRO2242|TRIP-1|TRIP1|eIF3-beta|eIF3-p36|Q13347	ENSG00000084623
EIF2B5	Translation initiation factor eIF-2B subunit epsilon OS=Homo sapiens GN=EIF2B5 PE=1 SV=3	3	3	7	29000000	14000000		30000000	22000000	27000000	21500000	19750000	0.918605	-0.122484	0.874769	0.0581068	24500000	26000000	1.13953	1.2093	0.188445	0.274175	3	FALSE	TRUE	TRUE	13	411	3.16302	Tnon_mito	CACH|CLE|EIF-2B|EIF2Bepsilon|LVWM|Q13144	ENSG00000145191
USP14	Ubiquitin carboxyl-terminal hydrolase 14 OS=Homo sapiens GN=USP14 PE=1 SV=3	4	4	8	55000000	42000000				30000000	48500000	7500000	0.154639	-2.69302	0.0199331	1.70042	15000000	0	0.309278	0	-1.69302		1	TRUE	TRUE	TRUE	48	411	11.6788	Tnon_mito	TGT|P54578	ENSG00000101557
USP10	Isoform 2 of Ubiquitin carboxyl-terminal hydrolase 10 OS=Homo sapiens GN=USP10	9	9	24	56000000	97000000	48000000	50000000	93000000	46000000	76500000	59250000	0.77451	-0.368645	0.551595	0.25838	69500000	71500000	0.908497	0.934641	-0.138447	-0.0975165	4	FALSE	TRUE	TRUE	35	411	8.51582	Tnon_mito	UBPO|Q14694	ENSG00000103194
MINPP1	Multiple inositol polyphosphate phosphatase 1 OS=Homo sapiens GN=MINPP1 PE=1 SV=1	1	1	1				11000000			0	2750000	100	6.64386	0.391002	0.407821	0	5500000	0	100		6.64386	1	FALSE	FALSE	FALSE	1	411	0.243309	Tnon_mito	HIPER1|MINPP2|MIPP|Q9UNW1	ENSG00000107789
STUB1	E3 ubiquitin-protein ligase CHIP OS=Homo sapiens GN=STUB1 PE=1 SV=2	2	2	3	35000000	14000000		16000000			24500000	4000000	0.163265	-2.61471	0.272324	0.564914	0	8000000	0	0.326531		-1.61471	1	FALSE	FALSE	FALSE	62	411	15.0852	Tnon_mito	CHIP|HSPABP2|NY-CO-7|SDCCAG7|UBOX1|Q9UNE7	ENSG00000103266
CELF1	CUG triplet repeat, RNA binding protein 1, isoform CRA_c OS=Homo sapiens GN=CELF1 PE=4 SV=1	1	1	3				24000000		16000000	0	10000000	100	6.64386	0.194171	0.711815	8000000	12000000	100	100	6.64386	6.64386	2	FALSE	FALSE	FALSE	10	411	2.43309	Tnon_mito	BRUNOL2|CUG-BP|CUGBP|CUGBP1|EDEN-BP|NAB50|NAPOR|hNab50|Q92879	ENSG00000149187
SUPT16H	FACT complex subunit SPT16 OS=Homo sapiens GN=SUPT16H PE=1 SV=1	11	11	21	85000000	42000000	34000000	19000000	32000000	39000000	63500000	31000000	0.488189	-1.03449	0.364697	0.438068	35500000	25500000	0.559055	0.401575	-0.838938	-1.31626	4	FALSE	TRUE	TRUE	76	411	18.4915	Tnon_mito	CDC68|FACTP140|SPT16/CDC68|Q9Y5B9	ENSG00000092201
GEMIN5	Gem-associated protein 5 OS=Homo sapiens GN=GEMIN5 PE=1 SV=3	23	23	58	74000000	43000000	46000000	56000000	41000000	46000000	58500000	47250000	0.807692	-0.308122	0.598811	0.222711	43500000	48500000	0.74359	0.82906	-0.427421	-0.270452	4	FALSE	TRUE	TRUE	44	411	10.7056	Tnon_mito	GEMIN-5|Q8TEQ6	ENSG00000082516
PHGDH	D-3-phosphoglycerate dehydrogenase OS=Homo sapiens GN=PHGDH PE=1 SV=4	16	16	82	260000000	200000000	91000000	120000000	83000000	110000000	230000000	101000000	0.43913	-1.18728	0.123581	0.908048	96500000	101500000	0.419565	0.441304	-1.25303	-1.18015	4	FALSE	TRUE	TRUE	152	411	36.983	Tnon_mito	3-PGDH|3PGDH|HEL-S-113|PDG|PGAD|PGD|PGDH|SERA|O43175	ENSG00000092621
NLE1	Notchless protein homolog 1 OS=Homo sapiens GN=NLE1 PE=1 SV=4	1	1	2				12000000	9600000		0	5400000	100	6.64386	0.185596	0.731432	4800000	10800000	100	100	6.64386	6.64386	2	FALSE	FALSE	FALSE	14	411	3.40633	Tnon_mito	Nle|Q9NVX2	ENSG00000073536
IMP3	U3 small nucleolar ribonucleoprotein protein IMP3 OS=Homo sapiens GN=IMP3 PE=1 SV=1	1	1	2					12000000	13000000	0	6250000	100	6.64386	0.182199	0.739454	12500000	6000000	100	100	6.64386	6.64386	2	FALSE	FALSE	FALSE	16	411	3.89294	Tpossible_mito	BRMS2|C15orf12|MRPS4|Q9NV31	ENSG00000177971
PNO1	RNA-binding protein PNO1 OS=Homo sapiens GN=PNO1 PE=1 SV=1	2	2	11	11000000	14000000	14000000	21000000	13000000	8300000	12500000	14075000	1.126	0.171207	0.629582	0.200948	10650000	17000000	0.852	1.36	-0.231075	0.443607	4	FALSE	FALSE	TRUE	17	411	4.13625	Tnon_mito	KHRBP1|RRP20|Q9NRX1	ENSG00000115946
WDR26	WD repeat-containing protein 26 OS=Homo sapiens GN=WDR26 PE=1 SV=3	3	3	4	19000000	39000000		33000000			29000000	8250000	0.284483	-1.81359	0.227688	0.642661	0	16500000	0	0.568966		-0.813587	1	FALSE	TRUE	FALSE	28	411	6.81265	Tnon_mito	CDW2|GID7|MIP2|Q9H7D7	ENSG00000162923
SH3BGRL	SH3 domain-binding glutamic acid-rich-like protein OS=Homo sapiens GN=SH3BGRL PE=1 SV=1	1	1	4	39000000	29000000	16000000		10000000		34000000	6500000	0.191176	-2.38702	0.0374815	1.42618	5000000	5000000	0.147059	0.147059	-2.76553	-2.76553	2	TRUE	FALSE	FALSE	1	411	0.243309	Tnon_mito	HEL-S-115|SH3BGR|O75368	ENSG00000131171
NPC2	Epididymal secretory protein E1 (Fragment) OS=Homo sapiens GN=NPC2 PE=2 SV=1	4	4	13	71000000	48000000	36000000	63000000	56000000	66000000	59500000	55250000	0.928571	-0.106915	0.784078	0.105641	61000000	59500000	1.02521	1	0.0359196	0	4	FALSE	TRUE	TRUE	0	411	0	Tnon_mito	EDDM1|HE1|P61916	ENSG00000119655
ARL3	ADP-ribosylation factor-like protein 3 OS=Homo sapiens GN=ARL3 PE=1 SV=2	4	4	5	32000000	25000000		35000000	28000000		28500000	15750000	0.552632	-0.85561	0.270336	0.568096	14000000	31500000	0.491228	1.10526	-1.02554	0.14439	2	FALSE	TRUE	TRUE	9	411	2.18978	Tnon_mito	ARFL3|P36405	ENSG00000138175
CAMK2D	Calcium/calmodulin-dependent protein kinase type II subunit delta OS=Homo sapiens GN=CAMK2D PE=2 SV=1	3	4	5	17000000		9100000			23000000	8500000	8025000	0.944118	-0.0829614	0.966965	0.0145893	11500000	0	1.35294	0	0.436099		2	FALSE	TRUE	TRUE	15	411	3.64964	Tnon_mito	CAMKD|Q13557	ENSG00000145349
CKM	Creatine kinase M-type OS=Homo sapiens GN=CKM PE=1 SV=2	1	1	6	79000000	320000000	69000000	63000000			199500000	33000000	0.165414	-2.59585	0.3945	0.403954	0	31500000	0	0.157895		-2.66297	2	FALSE	FALSE	TRUE	21	411	5.10949	Tnon_mito	CKMM|M-CK|P06732	ENSG00000104879
FLOT2	Flotillin-2 OS=Homo sapiens GN=FLOT2 PE=2 SV=1	1	1	3			26000000	56000000	30000000		0	28000000	100	6.64386	0.0922313	1.03512	15000000	43000000	100	100	6.64386	6.64386	3	FALSE	FALSE	FALSE	11	411	2.6764	Tnon_mito	ECS-1|ECS1|ESA|ESA1|M17S1|Q14254	ENSG00000132589
GNB1	Guanine nucleotide-binding protein G(I)/G(S)/G(T) subunit beta-1 OS=Homo sapiens GN=GNB1 PE=1 SV=3	5	7	31	51000000	49000000	61000000	72000000	41000000	54000000	50000000	57000000	1.14	0.189034	0.361692	0.441661	47500000	56500000	0.95	1.13	-0.0740006	0.176323	4	FALSE	TRUE	TRUE	59	411	14.3552	Tnon_mito	P62873	ENSG00000078369
KIF5B	Kinesin-1 heavy chain OS=Homo sapiens GN=KIF5B PE=1 SV=1	23	23	83	110000000	120000000	67000000	63000000	47000000	43000000	115000000	55000000	0.478261	-1.06413	0.00259405	2.58602	45000000	55000000	0.391304	0.478261	-1.35364	-1.06413	4	TRUE	TRUE	TRUE	97	411	23.601	Tnon_mito	HEL-S-61|KINH|KNS|KNS1|UKHC|P33176	ENSG00000170759
MYH10	Isoform 4 of Myosin-10 OS=Homo sapiens GN=MYH10	35	44	224	75000000	150000000	69000000	100000000	80000000	68000000	112500000	79250000	0.704444	-0.505442	0.535461	0.271272	74000000	90000000	0.657778	0.8	-0.604328	-0.321928	4	FALSE	TRUE	TRUE	166	411	40.3893	Tnon_mito	NMMHC-IIB|NMMHCB|P35580	ENSG00000133026
PGD	6-phosphogluconate dehydrogenase, decarboxylating OS=Homo sapiens GN=PGD PE=1 SV=3	11	11	72	210000000	170000000	91000000	94000000	68000000	71000000	190000000	81000000	0.426316	-1.23001	0.0878551	1.05623	69500000	81000000	0.365789	0.426316	-1.45091	-1.23001	4	FALSE	TRUE	TRUE	67	411	16.3017	Tnon_mito	6PGD|P52209	ENSG00000142657
RAN	GTP-binding nuclear protein Ran OS=Homo sapiens GN=RAN PE=4 SV=1	7	7	92	880000000	670000000	450000000	530000000	430000000	400000000	775000000	452500000	0.583871	-0.776279	0.180987	0.742352	415000000	480000000	0.535484	0.619355	-0.901085	-0.691162	4	FALSE	TRUE	TRUE	154	411	37.4696	Tnon_mito	ARA24|Gsp1|TC4|P62826	ENSG00000132341
RPL27A	60S ribosomal protein L27a OS=Homo sapiens GN=RPL27A PE=1 SV=2	4	4	46	1000000000	590000000	460000000	760000000	450000000	720000000	795000000	597500000	0.751572	-0.412016	0.502938	0.298486	585000000	605000000	0.735849	0.761006	-0.442518	-0.39402	4	FALSE	TRUE	TRUE	198	411	48.1752	Tnon_mito	L27A|P46776	ENSG00000166441
EHD1	EH domain-containing protein 1 OS=Homo sapiens GN=EHD1 PE=1 SV=2	2	2	6	31000000	71000000	23000000	24000000	23000000	21000000	51000000	22750000	0.446078	-1.16463	0.392006	0.406707	22000000	23500000	0.431373	0.460784	-1.21299	-1.11784	4	FALSE	FALSE	TRUE	1	411	0.243309	Tnon_mito	H-PAST|HPAST1|PAST|PAST1|Q9H4M9	ENSG00000110047
TOMM34	Mitochondrial import receptor subunit TOM34 OS=Homo sapiens GN=TOMM34 PE=1 SV=2	1	1	1	15000000						7500000	0	0		0.5	0.30103	0	0	0	0			0	FALSE	FALSE	FALSE	18	411	4.37956	Tmito	HTOM34P|TOM34|URCC3|Q15785	ENSG00000025772
DNAJC13	DnaJ homolog subfamily C member 13 OS=Homo sapiens GN=DNAJC13 PE=1 SV=5	1	1	1		12000000					6000000	0	0		0.5	0.30103	0	0	0	0			0	FALSE	FALSE	FALSE	13	411	3.16302	Tnon_mito	RME8|O75165	ENSG00000138246
SRPRB	Signal recognition particle receptor subunit beta OS=Homo sapiens GN=SRPRB PE=1 SV=3	12	12	61	130000000	94000000	160000000	160000000	130000000	140000000	112000000	147500000	1.31696	0.397216	0.265385	0.576124	135000000	145000000	1.20536	1.29464	0.269461	0.372554	4	FALSE	TRUE	TRUE	35	411	8.51582	Tnon_mito	APMCF1|Q9Y5M8	ENSG00000144867
PGP	Phosphoglycolate phosphatase OS=Homo sapiens GN=PGP PE=1 SV=1	1	1	2	30000000	34000000					32000000	0	0		0.039737	1.4008	0	0	0	0			0	TRUE	FALSE	FALSE	6	411	1.45985	Tnon_mito	A6NDG6	ENSG00000184207
CSTF3	Cleavage stimulation factor subunit 3 OS=Homo sapiens GN=CSTF3 PE=1 SV=1	1	1	5	13000000	18000000	16000000	8200000		11000000	15500000	8800000	0.567742	-0.816693	0.188459	0.724783	5500000	4100000	0.354839	0.264516	-1.49476	-1.91857	3	FALSE	FALSE	TRUE	32	411	7.78589	Tnon_mito	CSTF-77|Q12996	ENSG00000176102
TCF20	Transcription factor 20 OS=Homo sapiens GN=TCF20 PE=1 SV=3	1	1	2					7200000	8000000	0	3800000	100	6.64386	0.182571	0.738569	7600000	3600000	100	100	6.64386	6.64386	2	FALSE	FALSE	FALSE	29	411	7.05596	Tnon_mito	AR1|SPBP|TCF-20|Q9UGU0	ENSG00000100207
OFD1	Oral-facial-digital syndrome 1 protein OS=Homo sapiens GN=OFD1 PE=1 SV=1	1	1	1	80000000						40000000	0	0		0.5	0.30103	0	0	0	0			0	FALSE	FALSE	FALSE	13	411	3.16302	Tnon_mito	71-7A|CXorf5|JBTS10|RP23|SGBS2|O75665	ENSG00000046651
HYDIN	Hydrocephalus-inducing protein homolog (Fragment) OS=Homo sapiens GN=HYDIN PE=4 SV=1	1	1	2			73000000	84000000			0	39250000	100	6.64386	0.183249	0.736959	0	42000000	0	100		6.64386	2	FALSE	FALSE	FALSE	0	411	0	Tnon_mito	CILD5|HYDIN1|HYDIN2|PPP1R31|Q4G0P3	ENSG00000157423
RCN1	Reticulocalbin-1 OS=Homo sapiens GN=RCN1 PE=1 SV=1	9	9	50	97000000	120000000	140000000	160000000	110000000	120000000	108500000	132500000	1.2212	0.288297	0.233325	0.632038	115000000	135000000	1.05991	1.24424	0.0839388	0.315264	4	FALSE	TRUE	TRUE	54	411	13.1387	Tnon_mito	HEL-S-84|PIG20|RCAL|RCN|Q15293	ENSG00000049449
MANF	Mesencephalic astrocyte-derived neurotrophic factor OS=Homo sapiens GN=MANF PE=1 SV=3	3	3	8	70000000	43000000	38000000	53000000	43000000	48000000	56500000	45500000	0.80531	-0.312384	0.561858	0.250373	45500000	48000000	0.80531	0.849558	-0.312384	-0.235216	4	FALSE	TRUE	TRUE	15	411	3.64964	Tnon_mito	ARMET|ARP|P55145	ENSG00000145050
VPS25	Vacuolar protein-sorting-associated protein 25 OS=Homo sapiens GN=VPS25 PE=1 SV=1	1	1	2			16000000	19000000			0	8750000	100	6.64386	0.18402	0.735135	0	9500000	0	100		6.64386	2	FALSE	FALSE	FALSE	3	411	0.729927	Tpossible_mito	DERP9|EAP20|FAP20|Q9BRG1	ENSG00000131475
KIAA0391	Mitochondrial ribonuclease P protein 3 OS=Homo sapiens GN=KIAA0391 PE=1 SV=2	2	2	5		12000000	28000000	26000000	18000000		6000000	18000000	3	1.58496	0.259221	0.58633	9000000	22000000	1.5	3.66667	0.584963	1.87447	3	FALSE	FALSE	TRUE	4	411	0.973236	Tmito	MRPP3|PRORP|O15091	ENSG00000100890
CIRBP	Cold-inducible RNA-binding protein OS=Homo sapiens GN=CIRBP PE=1 SV=1	4	4	56	160000000	190000000	210000000	260000000	210000000	230000000	175000000	227500000	1.3	0.378512	0.0938447	1.02759	220000000	235000000	1.25714	1.34286	0.330149	0.425306	4	FALSE	TRUE	TRUE	107	411	26.0341	Tnon_mito	CIRP|Q14011	ENSG00000099622
FLII	Protein flightless-1 homolog OS=Homo sapiens GN=FLII PE=1 SV=2	3	3	3	89000000	46000000	15000000				67500000	3750000	0.0555556	-4.16993	0.198201	0.702894	0	0	0	0			1	FALSE	TRUE	FALSE	36	411	8.75912	Tnon_mito	FLI|FLIL|Fli1|Q13045	ENSG00000177731
NRAS	GTPase NRas OS=Homo sapiens GN=NRAS PE=1 SV=1	1	1	1				70000000			0	17500000	100	6.64386	0.391002	0.407821	0	35000000	0	100		6.64386	1	FALSE	FALSE	FALSE	10	411	2.43309	Tnon_mito	ALPS4|N-ras|NRAS1|NS6|P01111	ENSG00000213281
THOP1	Thimet oligopeptidase OS=Homo sapiens GN=THOP1 PE=1 SV=2	1	1	1	23000000						11500000	0	0		0.5	0.30103	0	0	0	0			0	FALSE	FALSE	FALSE	7	411	1.70316	Tnon_mito	EP24.15|MEPD_HUMAN|MP78|TOP|P52888	ENSG00000172009
KTN1	Kinectin OS=Homo sapiens GN=KTN1 PE=1 SV=1	20	20	65	72000000	81000000	44000000	65000000	55000000	53000000	76500000	54250000	0.70915	-0.495837	0.040288	1.39482	54000000	60000000	0.705882	0.784314	-0.5025	-0.350497	4	TRUE	TRUE	TRUE	39	411	9.48905	Tnon_mito	CG1|KNT|MU-RMS-40.19|Q86UP2	ENSG00000126777
CORO7	Isoform 3 of Coronin-7 OS=Homo sapiens GN=CORO7	1	1	2						28000000	0	7000000	100	6.64386	0.391002	0.407821	14000000	0	100	0	6.64386		1	FALSE	FALSE	FALSE	5	411	1.21655	Tnon_mito	0610011B16Rik|CRN7|POD1|P57737	ENSG00000262246
ATP5J2-PTCD1	Pentatricopeptide repeat-containing protein 1, mitochondrial OS=Homo sapiens GN=ATP5J2-PTCD1 PE=4 SV=1	3	3	10	35000000	16000000	27000000	7100000	19000000	45000000	25500000	24525000	0.961765	-0.0562441	0.943173	0.0254087	32000000	13050000	1.2549	0.511765	0.327575	-0.966447	4	FALSE	TRUE	TRUE				Tmito	B4DJ38	ENSG00000106246
DNMT1	Isoform 2 of DNA (cytosine-5)-methyltransferase 1 OS=Homo sapiens GN=DNMT1	11	11	28	35000000	29000000	32000000	28000000	17000000	24000000	32000000	25250000	0.789062	-0.341789	0.216006	0.665533	20500000	22500000	0.640625	0.703125	-0.642448	-0.508147	4	FALSE	TRUE	TRUE	42	411	10.219	Tnon_mito	ADCADN|AIM|CXXC9|DNMT|HSN1E|MCMT|P26358	ENSG00000130816
HNRNPL	Heterogeneous nuclear ribonucleoprotein L OS=Homo sapiens GN=HNRNPL PE=1 SV=2	9	9	31	89000000	88000000	57000000	37000000	50000000	29000000	88500000	43250000	0.488701	-1.03298	0.00539098	2.26833	39500000	43500000	0.446328	0.491525	-1.16382	-1.02466	4	TRUE	TRUE	TRUE	190	411	46.2287	Tnon_mito	HNRPL|hnRNP-L|P14866	ENSG00000104824
NUDT1	7,8-dihydro-8-oxoguanine triphosphatase OS=Homo sapiens GN=NUDT1 PE=1 SV=3	2	2	5			7800000	11000000	8700000	12000000	0	9875000	100	6.64386	0.00206623	2.68482	10350000	9850000	100	100	6.64386	6.64386	4	TRUE	FALSE	TRUE	9	411	2.18978	Tpossible_mito	MTH1|P36639	ENSG00000106268
PLAA	Phospholipase A-2-activating protein OS=Homo sapiens GN=PLAA PE=1 SV=2	1	1	6	12000000	9700000	11000000	12000000	7300000	9000000	10850000	9825000	0.90553	-0.143166	0.561365	0.250754	8150000	9650000	0.751152	0.889401	-0.412823	-0.169094	4	FALSE	FALSE	TRUE	16	411	3.89294	Tnon_mito	DOA1|PLA2P|PLAP|Q9Y263	ENSG00000137055
CHD1L	Chromodomain-helicase-DNA-binding protein 1-like OS=Homo sapiens GN=CHD1L PE=1 SV=2	1	1	1					33000000		0	8250000	100	6.64386	0.391002	0.407821	16500000	16500000	100	100	6.64386	6.64386	1	FALSE	FALSE	FALSE	1	411	0.243309	Tnon_mito	ALC1|CHDL|Q86WJ1	ENSG00000131778
ADAP1	Arf-GAP with dual PH domain-containing protein 1 (Fragment) OS=Homo sapiens GN=ADAP1 PE=4 SV=1	1	1	1	50000000						25000000	0	0		0.5	0.30103	0	0	0	0			0	FALSE	FALSE	FALSE	0	411	0	Tnon_mito	CENTA1|GCS1L|p42IP4|O75689	ENSG00000105963
GMPR2	GMP reductase OS=Homo sapiens GN=GMPR2 PE=3 SV=1	2	2	4	21000000	13000000		11000000			17000000	2750000	0.161765	-2.62803	0.0980278	1.00865	0	5500000	0	0.323529		-1.62803	1	FALSE	FALSE	FALSE	4	411	0.973236	Tnon_mito	Q9P2T1	ENSG00000100938
NUB1	NEDD8 ultimate buster 1 OS=Homo sapiens GN=NUB1 PE=2 SV=1	1	1	3	13000000			7500000			6500000	1875000	0.288462	-1.79355	0.604183	0.218832	0	3750000	0	0.576923		-0.793549	1	FALSE	FALSE	FALSE	2	411	0.486618	Tnon_mito	BS4|NUB1L|NYREN18|Q9Y5A7	ENSG00000013374
PSPC1	Paraspeckle component 1 OS=Homo sapiens GN=PSPC1 PE=1 SV=1	5	5	30	100000000	75000000	65000000	87000000	61000000	69000000	87500000	70500000	0.805714	-0.31166	0.380443	0.419711	65000000	74000000	0.742857	0.845714	-0.428843	-0.241758	4	FALSE	TRUE	TRUE	82	411	19.9513	Tnon_mito	PSP1|Q8WXF1	ENSG00000121390
WDR48	WD repeat-containing protein 48 OS=Homo sapiens GN=WDR48 PE=1 SV=1	2	2	3			21000000		16000000	22000000	0	14750000	100	6.64386	0.0625772	1.20358	19000000	8000000	100	100	6.64386	6.64386	3	FALSE	FALSE	FALSE	2	411	0.486618	Tnon_mito	P80|UAF1|Q8TAF3	ENSG00000114742
DHX40	Probable ATP-dependent RNA helicase DHX40 OS=Homo sapiens GN=DHX40 PE=1 SV=2	1	1	1				13000000			0	3250000	100	6.64386	0.391002	0.407821	0	6500000	0	100		6.64386	1	FALSE	FALSE	FALSE	5	411	1.21655	Tnon_mito	DDX40|PAD|Q8IX18	ENSG00000108406
ARL13B	ADP-ribosylation factor-like protein 13B OS=Homo sapiens GN=ARL13B PE=1 SV=1	1	1	1						18000000	0	4500000	100	6.64386	0.391002	0.407821	9000000	0	100	0	6.64386		1	FALSE	FALSE	FALSE	2	411	0.486618	Tnon_mito	ARL2L1|JBTS8|Q3SXY8	ENSG00000169379
ACTC1	Actin, alpha cardiac muscle 1 OS=Homo sapiens GN=ACTC1 PE=1 SV=1	1	8	133	1500000000	750000000	730000000	780000000	350000000	600000000	1125000000	615000000	0.546667	-0.871267	0.393504	0.405051	475000000	565000000	0.422222	0.502222	-1.24393	-0.993602	4	FALSE	TRUE	TRUE	354	411	86.1314	Tnon_mito	ACTC|ASD5|CMD1R|CMH11|LVNC4|P68032	ENSG00000159251
CAPN1	Calpain-1 catalytic subunit OS=Homo sapiens GN=CAPN1 PE=1 SV=1	1	1	1	15000000						7500000	0	0		0.5	0.30103	0	0	0	0			0	FALSE	FALSE	FALSE	19	411	4.62287	Tnon_mito	CANP|CANP1|CANPL1|muCANP|muCL|P07384	ENSG00000014216
CENPE	Centromere-associated protein E OS=Homo sapiens GN=CENPE PE=1 SV=2	1	1	1		43000000					21500000	0	0		0.5	0.30103	0	0	0	0			0	FALSE	FALSE	FALSE	1	411	0.243309	Tnon_mito	CENP-E|KIF10|PPP1R61|Q02224	ENSG00000138778
CPD	Carboxypeptidase D OS=Homo sapiens GN=CPD PE=1 SV=2	11	11	29	18000000	25000000	64000000	74000000	32000000	37000000	21500000	51750000	2.40698	1.26722	0.0550589	1.25917	34500000	53000000	1.60465	2.46512	0.68226	1.30166	4	FALSE	TRUE	TRUE	4	411	0.973236	Tnon_mito	GP180|O75976	ENSG00000108582
CSNK2A2	Casein kinase II subunit alpha' OS=Homo sapiens GN=CSNK2A2 PE=1 SV=1	2	2	4		19000000	30000000	40000000	34000000		9500000	26000000	2.73684	1.45251	0.300038	0.522824	17000000	37000000	1.78947	3.89474	0.839535	1.96153	3	FALSE	FALSE	FALSE	23	411	5.59611	Tnon_mito	CK2A2|CSNK2A1|P19784	ENSG00000070770
DSP	Desmoplakin OS=Homo sapiens GN=DSP PE=1 SV=3	2	2	2				88000000		13000000	0	25250000	100	6.64386	0.318139	0.497383	6500000	44000000	100	100	6.64386	6.64386	2	FALSE	FALSE	FALSE	126	411	30.6569	Tpossible_mito	DP|DPI|DPII|P15924	ENSG00000096696
EIF4B	Eukaryotic translation initiation factor 4B OS=Homo sapiens GN=EIF4B PE=2 SV=1	9	9	54	69000000	75000000	100000000	110000000	100000000	75000000	72000000	96250000	1.33681	0.41879	0.0427508	1.36906	87500000	105000000	1.21528	1.45833	0.281286	0.544321	4	TRUE	TRUE	TRUE	167	411	40.6326	Tnon_mito	EIF-4B|PRO1843|P23588	ENSG00000063046
CTTN	Src substrate cortactin OS=Homo sapiens GN=CTTN PE=1 SV=2	9	9	35	94000000	63000000	64000000	84000000	60000000	65000000	78500000	68250000	0.869427	-0.201864	0.626721	0.202926	62500000	72000000	0.796178	0.917197	-0.328836	-0.124696	4	FALSE	TRUE	TRUE	73	411	17.7616	Tnon_mito	EMS1|Q14247	ENSG00000085733
FMR1	Fragile X mental retardation protein 1 OS=Homo sapiens GN=FMR1 PE=1 SV=1	1	3	7		28000000		14000000		13000000	14000000	6750000	0.482143	-1.05247	0.695983	0.157401	6500000	7000000	0.464286	0.5	-1.10692	-1	2	FALSE	TRUE	TRUE	43	411	10.4623	Tnon_mito	FMRP|FRAXA|POF|POF1|Q06787	ENSG00000102081
GRB2	Growth factor receptor-bound protein 2 OS=Homo sapiens GN=GRB2 PE=1 SV=1	2	2	3					16000000	15000000	0	7750000	100	6.64386	0.182021	0.739878	15500000	8000000	100	100	6.64386	6.64386	2	FALSE	FALSE	FALSE	7	411	1.70316	Tnon_mito	ASH|EGFRBP-GRB2|Grb3-3|MST084|MSTP084|NCKAP2|P62993	ENSG00000177885
HMGCS1	Hydroxymethylglutaryl-CoA synthase, cytoplasmic OS=Homo sapiens GN=HMGCS1 PE=1 SV=2	2	2	4	36000000	32000000	19000000				34000000	4750000	0.139706	-2.83954	0.00554564	2.25605	0	0	0	0			1	TRUE	FALSE	FALSE	14	411	3.40633	Tnon_mito	HMGCS|Q01581	ENSG00000112972
MYO1D	Unconventional myosin-Id OS=Homo sapiens GN=MYO1D PE=1 SV=2	1	1	1						91000000	0	22750000	100	6.64386	0.391002	0.407821	45500000	0	100	0	6.64386		1	FALSE	FALSE	FALSE	33	411	8.0292	Tnon_mito	myr4|O94832	ENSG00000176658
MYO5B	Unconventional myosin-Vb (Fragment) OS=Homo sapiens GN=MYO5B PE=4 SV=1	1	1	1			54000000				0	13500000	100	6.64386	0.391002	0.407821	0	0	0	0			1	FALSE	FALSE	FALSE	19	411	4.62287	Tnon_mito	Q9ULV0	ENSG00000167306
PAK2	Serine/threonine-protein kinase PAK 2 OS=Homo sapiens GN=PAK2 PE=1 SV=3	1	1	1		54000000					27000000	0	0		0.5	0.30103	0	0	0	0			0	FALSE	FALSE	FALSE	14	411	3.40633	Tnon_mito	PAK65|PAKgamma|Q13177	ENSG00000180370
PPID	Peptidyl-prolyl cis-trans isomerase D OS=Homo sapiens GN=PPID PE=1 SV=3	5	5	27	63000000	46000000	24000000	29000000	20000000	34000000	54500000	26750000	0.490826	-1.02672	0.156507	0.805466	27000000	24500000	0.495413	0.449541	-1.0133	-1.15347	4	FALSE	TRUE	TRUE	3	411	0.729927	Tpossible_mito	CYP-40|CYPD|Q08752	ENSG00000171497
PPP5C	Serine/threonine-protein phosphatase 5 OS=Homo sapiens GN=PPP5C PE=1 SV=1	3	3	7	49000000	64000000	36000000	33000000	28000000		56500000	24250000	0.429204	-1.22027	0.0564212	1.24856	14000000	30500000	0.247788	0.539823	-2.01282	-0.889442	3	FALSE	TRUE	TRUE	17	411	4.13625	Tnon_mito	PP5|PPP5|PPT|P53041	ENSG00000011485
PSMA1	Isoform Long of Proteasome subunit alpha type-1 OS=Homo sapiens GN=PSMA1	10	10	34	130000000	120000000	68000000	75000000	49000000	63000000	125000000	63750000	0.51	-0.971431	0.00266037	2.57506	56000000	62000000	0.448	0.496	-1.15843	-1.01159	4	TRUE	TRUE	TRUE	86	411	20.9246	Tnon_mito	HC2|HEL-S-275|NU|PROS30|P25786	ENSG00000129084
PSMA3	Proteasome subunit alpha type-3 OS=Homo sapiens GN=PSMA3 PE=1 SV=2	6	6	11	66000000	110000000		55000000		49000000	88000000	26000000	0.295455	-1.75899	0.144977	0.838702	24500000	27500000	0.278409	0.3125	-1.84472	-1.67807	2	FALSE	TRUE	TRUE	78	411	18.9781	Tnon_mito	HC8|PSC3|P25788	ENSG00000100567
SDCBP	Syndecan binding protein (Syntenin), isoform CRA_a OS=Homo sapiens GN=SDCBP PE=4 SV=1	2	2	5	24000000	31000000	16000000			32000000	27500000	12000000	0.436364	-1.1964	0.141778	0.848392	16000000	0	0.581818	0	-0.78136		2	FALSE	FALSE	TRUE	13	411	3.16302	Tnon_mito	MDA-9|ST1|SYCL|TACIP18|O00560	ENSG00000137575
SEL1L	Protein sel-1 homolog 1 OS=Homo sapiens GN=SEL1L PE=1 SV=3	2	2	7		24000000	47000000	16000000	9100000	18000000	12000000	22525000	1.87708	0.908493	0.54513	0.2635	13550000	12550000	1.12917	1.04583	0.175258	0.064653	4	FALSE	FALSE	TRUE	3	411	0.729927	Tnon_mito	PRO1063|SEL1-LIKE|SEL1L1|Q9UBV2	ENSG00000071537
SNRNP70	U1 small nuclear ribonucleoprotein 70 kDa OS=Homo sapiens GN=SNRNP70 PE=1 SV=2	7	7	19	49000000	46000000	36000000	47000000	35000000	35000000	47500000	38250000	0.805263	-0.312468	0.0486844	1.31261	35000000	41000000	0.736842	0.863158	-0.440573	-0.212304	4	TRUE	TRUE	TRUE	108	411	26.2774	Tnon_mito	RNPU1Z|RPU1|SNRP70|Snp1|U1-70K|U170K|U1AP|U1RNP|P08621	ENSG00000104852
SNRPB2	U2 small nuclear ribonucleoprotein B'' OS=Homo sapiens GN=SNRPB2 PE=1 SV=1	3	4	10	55000000	43000000	30000000	45000000	66000000		49000000	35250000	0.719388	-0.475158	0.416717	0.380159	33000000	55500000	0.673469	1.13265	-0.570316	0.179706	3	FALSE	TRUE	TRUE	94	411	22.871	Tnon_mito	Msl1|P08579	ENSG00000125870
STAT1	Signal transducer and activator of transcription 1-alpha/beta OS=Homo sapiens GN=STAT1 PE=1 SV=2	1	1	1	23000000						11500000	0	0		0.5	0.30103	0	0	0	0			0	FALSE	FALSE	FALSE	23	411	5.59611	Tnon_mito	CANDF7|ISGF-3|STAT91|P42224	ENSG00000115415
TRIM25	E3 ubiquitin/ISG15 ligase TRIM25 OS=Homo sapiens GN=TRIM25 PE=1 SV=2	8	8	24	45000000	42000000	38000000	48000000	28000000	35000000	43500000	37250000	0.856322	-0.223775	0.23618	0.626757	31500000	38000000	0.724138	0.873563	-0.465664	-0.195016	4	FALSE	TRUE	TRUE	29	411	7.05596	Tnon_mito	EFP|RNF147|Z147|ZNF147|Q14258	ENSG00000121060
ANP32A	Acidic leucine-rich nuclear phosphoprotein 32 family member A OS=Homo sapiens GN=ANP32A PE=1 SV=1	3	4	34	110000000	130000000	75000000	69000000	60000000	38000000	120000000	60500000	0.504167	-0.988027	0.0305459	1.51505	49000000	64500000	0.408333	0.5375	-1.29218	-0.895663	4	TRUE	TRUE	TRUE	45	411	10.9489	Tnon_mito	C15orf1|HPPCn|I1PP2A|LANP|MAPM|PHAP1|PHAPI|PP32|P39687	ENSG00000140350
TTF2	Transcription termination factor 2 OS=Homo sapiens GN=TTF2 PE=1 SV=2	2	2	6		10000000	12000000	9700000	8000000	11000000	5000000	10175000	2.035	1.02503	0.485947	0.313411	9500000	8850000	1.9	1.77	0.925999	0.823749	4	FALSE	FALSE	TRUE	10	411	2.43309	Tnon_mito	HuF2|Q9UNY4	ENSG00000116830
PPFIA1	Liprin-alpha-1 OS=Homo sapiens GN=PPFIA1 PE=1 SV=1	1	1	2	12000000			17000000			6000000	4250000	0.708333	-0.4975	0.833273	0.0792125	0	8500000	0	1.41667		0.5025	1	FALSE	FALSE	FALSE	6	411	1.45985	Tnon_mito	LIP.1|LIP1|LIPRIN|Q13136	ENSG00000131626
LIN7A	Protein lin-7 homolog A OS=Homo sapiens GN=LIN7A PE=1 SV=2	2	2	5			21000000	27000000		18000000	0	16500000	100	6.64386	0.0656364	1.18286	9000000	13500000	100	100	6.64386	6.64386	3	FALSE	FALSE	TRUE	3	411	0.729927	Tnon_mito	LIN-7A|LIN7|MALS-1|TIP-33|VELI1|O14910	ENSG00000111052
PRPF4B	Serine/threonine-protein kinase PRP4 homolog OS=Homo sapiens GN=PRPF4B PE=1 SV=3	1	1	1					46000000		0	11500000	100	6.64386	0.391002	0.407821	23000000	23000000	100	100	6.64386	6.64386	1	FALSE	FALSE	FALSE	36	411	8.75912	Tnon_mito	PR4H|PRP4|PRP4H|PRP4K|dJ1013A10.1|Q13523	ENSG00000112739
HERC2	E3 ubiquitin-protein ligase HERC2 OS=Homo sapiens GN=HERC2 PE=1 SV=2	2	2	2	160000000					3500000	80000000	875000	0.0109375	-6.51457	0.503488	0.298011	1750000	0	0.021875	0	-5.51457		1	FALSE	FALSE	FALSE	8	411	1.94647	Tpossible_mito	D15F37S1|MRT38|SHEP1|jdf2|p528|O95714	ENSG00000128731
ARHGEF2	Rho guanine nucleotide exchange factor 2 OS=Homo sapiens GN=ARHGEF2 PE=4 SV=1	2	2	4	13000000	24000000		37000000			18500000	9250000	0.5	-1	0.438538	0.357993	0	18500000	0	1		0	1	FALSE	FALSE	FALSE	19	411	4.62287	Tnon_mito	GEF|GEF-H1|GEFH1|LFP40|P40|Q92974	ENSG00000116584
GTF3C3	General transcription factor 3C polypeptide 3 OS=Homo sapiens GN=GTF3C3 PE=1 SV=1	1	1	1		27000000					13500000	0	0		0.5	0.30103	0	0	0	0			0	FALSE	FALSE	FALSE	31	411	7.54258	Tnon_mito	TFIIIC102|TFIIICgamma|TFiiiC2-102|Q9Y5Q9	ENSG00000119041
CDC42BPB	Serine/threonine-protein kinase MRCK beta OS=Homo sapiens GN=CDC42BPB PE=1 SV=2	1	1	2	16000000	11000000					13500000	0	0		0.116572	0.933406	0	0	0	0			0	FALSE	FALSE	FALSE	13	411	3.16302	Tnon_mito	MRCKB|Q9Y5S2	ENSG00000198752
HUWE1	E3 ubiquitin-protein ligase HUWE1 OS=Homo sapiens GN=HUWE1 PE=1 SV=3	16	16	35	48000000	63000000	29000000	27000000	15000000	9600000	55500000	20150000	0.363063	-1.46171	0.0656622	1.18268	12300000	21000000	0.221622	0.378378	-2.17383	-1.4021	4	FALSE	TRUE	TRUE	74	411	18.0049	Tnon_mito	ARF-BP1|HECTH9|HSPC272|Ib772|LASU1|MULE|URE-B1|UREB1|Q7Z6Z7	ENSG00000086758
PGRMC2	Isoform 2 of Membrane-associated progesterone receptor component 2 OS=Homo sapiens GN=PGRMC2	2	3	7	70000000	44000000	46000000		30000000	53000000	57000000	32250000	0.565789	-0.821663	0.262251	0.581284	41500000	15000000	0.72807	0.263158	-0.457851	-1.926	3	FALSE	TRUE	TRUE	35	411	8.51582	Tnon_mito	DG6|PMBP|O15173	ENSG00000164040
RBM14	RNA-binding protein 14 OS=Homo sapiens GN=RBM14 PE=1 SV=2	11	11	38	89000000	50000000	35000000	50000000	56000000	72000000	69500000	53250000	0.766187	-0.384231	0.552576	0.257608	64000000	53000000	0.920863	0.76259	-0.118941	-0.391021	4	FALSE	TRUE	TRUE	52	411	12.6521	Tnon_mito	COAA|PSP2|SIP|SYTIP1|TMEM137|A0A0S2Z4Z0	ENSG00000239306
TCERG1	Transcription elongation regulator 1 OS=Homo sapiens GN=TCERG1 PE=1 SV=2	3	3	7	42000000	13000000	37000000		22000000	45000000	27500000	26000000	0.945455	-0.08092	0.939672	0.0270235	33500000	11000000	1.21818	0.4	0.284729	-1.32193	3	FALSE	TRUE	TRUE	64	411	15.5718	Tnon_mito	CA150|TAF2S|Urn1|O14776	ENSG00000113649
SPEN	Msx2-interacting protein (Fragment) OS=Homo sapiens GN=SPEN PE=4 SV=1	1	1	1						23000000	0	5750000	100	6.64386	0.391002	0.407821	11500000	0	100	0	6.64386		1	FALSE	FALSE	FALSE	31	411	7.54258	Tnon_mito	HIAA0929|MINT|RBM15C|SHARP|Q96T58	ENSG00000065526
SPEN	Msx2-interacting protein OS=Homo sapiens GN=SPEN PE=1 SV=1	1	1	1	8600000						4300000	0	0		0.5	0.30103	0	0	0	0			0	FALSE	FALSE	FALSE	31	411	7.54258	Tnon_mito	HIAA0929|MINT|RBM15C|SHARP|Q96T58	ENSG00000065526
ZCCHC11	Terminal uridylyltransferase 4 OS=Homo sapiens GN=ZCCHC11 PE=1 SV=3	1	1	1					6900000		0	1725000	100	6.64386	0.391002	0.407821	3450000	3450000	100	100	6.64386	6.64386	1	FALSE	FALSE	FALSE	5	411	1.21655	Tnon_mito	PAPD3|TUT4|Q5TAX3	ENSG00000134744
KIF4A	Chromosome-associated kinesin KIF4A OS=Homo sapiens GN=KIF4A PE=1 SV=3	6	6	17		15000000	17000000	18000000	11000000	16000000	7500000	15500000	2.06667	1.04731	0.474897	0.3234	13500000	14500000	1.8	1.93333	0.847997	0.95109	4	FALSE	TRUE	TRUE	35	411	8.51582	Tnon_mito	KIF4|KIF4G1|O95239	ENSG00000090889
DBNL	Isoform 3 of Drebrin-like protein OS=Homo sapiens GN=DBNL	4	4	12	39000000	26000000	18000000	27000000	17000000	15000000	32500000	19250000	0.592308	-0.755581	0.256995	0.590076	16000000	22000000	0.492308	0.676923	-1.02237	-0.562936	4	FALSE	TRUE	TRUE	37	411	9.00243	Tnon_mito	ABP1|HIP-55|HIP55|SH3P7|Q9UJU6	ENSG00000136279
SETD2	Histone-lysine N-methyltransferase SETD2 OS=Homo sapiens GN=SETD2 PE=1 SV=3	1	1	1			2600000				0	650000	100	6.64386	0.391002	0.407821	0	0	0	0			1	FALSE	FALSE	FALSE	20	411	4.86618	Tnon_mito	HBP231|HIF-1|HIP-1|HYPB|KMT3A|SET2|p231HBP|Q9BYW2	ENSG00000181555
NENF	Neudesin OS=Homo sapiens GN=NENF PE=1 SV=1	3	3	7			34000000	36000000	34000000	31000000	0	33750000	100	6.64386	6.26162e-05	4.20331	32500000	35000000	100	100	6.64386	6.64386	4	TRUE	TRUE	TRUE	1	411	0.243309	Tnon_mito	CIR2|SCIRP10|SPUF|Q9UMX5	ENSG00000117691
MYO15A	Unconventional myosin-XV OS=Homo sapiens GN=MYO15A PE=1 SV=2	2	2	2		31000000				690000000	15500000	172500000	11.129	3.47626	0.430543	0.365984	345000000	0	22.2581	0	4.47626		1	FALSE	FALSE	FALSE	0	411	0	Tnon_mito	DFNB3|MYO15|Q9UKN7	ENSG00000091536
CDK12	Cyclin-dependent kinase 12 OS=Homo sapiens GN=CDK12 PE=1 SV=2	2	2	2		2700000	13000000				1350000	3250000	2.40741	1.26748	0.619449	0.207994	0	0	0	0			1	FALSE	FALSE	FALSE	41	411	9.97567	Tnon_mito	CRK7|CRKR|CRKRS|Q9NYV4	ENSG00000167258
RBM28	RNA-binding protein 28 OS=Homo sapiens GN=RBM28 PE=1 SV=3	1	1	1	7800000						3900000	0	0		0.5	0.30103	0	0	0	0			0	FALSE	FALSE	FALSE	54	411	13.1387	Tnon_mito	Q9NW13	ENSG00000106344
AMBRA1	Isoform 5 of Activating molecule in BECN1-regulated autophagy protein 1 OS=Homo sapiens GN=AMBRA1	1	1	2		6100000	5400000				3050000	1350000	0.442623	-1.17585	0.678479	0.168464	0	0	0	0			1	FALSE	FALSE	FALSE	2	411	0.486618	Tnon_mito	DCAF3|WDR94|Q9C0C7	ENSG00000110497
SRGAP1	SLIT-ROBO Rho GTPase-activating protein 1 OS=Homo sapiens GN=SRGAP1 PE=1 SV=1	1	1	1		6100000					3050000	0	0		0.5	0.30103	0	0	0	0			0	FALSE	FALSE	FALSE	8	411	1.94647	Tnon_mito	ARHGAP13|Q7Z6B7	ENSG00000196935
SLTM	SAFB-like transcription modulator (Fragment) OS=Homo sapiens GN=SLTM PE=4 SV=1	1	1	1	23000000						11500000	0	0		0.5	0.30103	0	0	0	0			0	FALSE	FALSE	FALSE	47	411	11.4355	Tnon_mito	Met|Q9NWH9	ENSG00000137776
ACTR2	Isoform 2 of Actin-related protein 2 OS=Homo sapiens GN=ACTR2	2	2	3	44000000	24000000					34000000	0	0		0.182106	0.739676	0	0	0	0			0	FALSE	FALSE	FALSE	51	411	12.4088	Tnon_mito	ARP2|P61160	ENSG00000138071
BAG2	BAG family molecular chaperone regulator 2 OS=Homo sapiens GN=BAG2 PE=1 SV=1	3	3	8	48000000	130000000	50000000	130000000	88000000	50000000	89000000	79500000	0.893258	-0.16285	0.859168	0.0659218	69000000	109000000	0.775281	1.22472	-0.367209	0.292451	4	FALSE	TRUE	TRUE	96	411	23.3577	Tnon_mito	BAG-2|dJ417I1.2|O95816	ENSG00000112208
CARHSP1	Calcium-regulated heat stable protein 1 OS=Homo sapiens GN=CARHSP1 PE=1 SV=2	2	2	3	67000000	20000000					43500000	0	0		0.315325	0.501242	0	0	0	0			0	FALSE	FALSE	FALSE	5	411	1.21655	Tnon_mito	CRHSP-24|CSDC1|Q9Y2V2	ENSG00000153048
EIF4E	Isoform 2 of Eukaryotic translation initiation factor 4E OS=Homo sapiens GN=EIF4E	6	6	45	91000000	140000000	200000000	210000000	190000000	240000000	115500000	210000000	1.81818	0.862496	0.116139	0.935022	215000000	200000000	1.86147	1.7316	0.896444	0.792107	4	FALSE	TRUE	TRUE	19	411	4.62287	Tnon_mito	AUTS19|CBP|EIF4E1|EIF4EL1|EIF4F|P06730	ENSG00000151247
COPS5	COP9 signalosome complex subunit 5 OS=Homo sapiens GN=COPS5 PE=1 SV=4	3	3	11	43000000	34000000		36000000	24000000		38500000	15000000	0.38961	-1.3599	0.0806475	1.09341	12000000	30000000	0.311688	0.779221	-1.68182	-0.359896	2	FALSE	TRUE	TRUE	26	411	6.32603	Tnon_mito	CSN5|JAB1|MOV-34|SGN5|Q92905	ENSG00000121022
COMMD9	COMM domain-containing protein 9 OS=Homo sapiens GN=COMMD9 PE=1 SV=2	3	3	8	31000000	35000000	22000000	29000000			33000000	12750000	0.386364	-1.37197	0.0703233	1.1529	0	14500000	0	0.439394		-1.18641	2	FALSE	TRUE	TRUE	0	411	0	Tnon_mito	Q9P000	ENSG00000110442
SRPR	Signal recognition particle receptor subunit alpha OS=Homo sapiens GN=SRPR PE=1 SV=2	6	6	30	56000000	46000000	49000000	40000000	46000000	38000000	51000000	43250000	0.848039	-0.237797	0.332637	0.47803	42000000	43000000	0.823529	0.843137	-0.280108	-0.246161	4	FALSE	TRUE	TRUE	25	411	6.08273	Tnon_mito	DP|Sralpha|P08240	ENSG00000182934
BAIAP3	Isoform 2 of BAI1-associated protein 3 OS=Homo sapiens GN=BAIAP3	1	1	2					470000000		0	117500000	100	6.64386	0.391002	0.407821	235000000	235000000	100	100	6.64386	6.64386	1	FALSE	FALSE	FALSE	0	411	0	Tnon_mito	BAP3|O94812	ENSG00000007516
DOCK7	Dedicator of cytokinesis protein 7 OS=Homo sapiens GN=DOCK7 PE=1 SV=4	2	2	3			13000000	15000000			0	7000000	100	6.64386	0.18331	0.736814	0	7500000	0	100		6.64386	2	FALSE	FALSE	FALSE	30	411	7.29927	Tnon_mito	ZIR2|Q96N67	ENSG00000116641
NAA10	N-alpha-acetyltransferase 10 OS=Homo sapiens GN=NAA10 PE=1 SV=1	5	5	34	120000000	98000000	66000000	110000000	100000000	89000000	109000000	91250000	0.837156	-0.256432	0.321674	0.492583	94500000	105000000	0.866972	0.963303	-0.205942	-0.0539388	4	FALSE	TRUE	TRUE	29	411	7.05596	Tnon_mito	ARD1|ARD1A|ARD1P|DXS707|MCOPS1|NATD|TE2|P41227	ENSG00000102030
LSM1	U6 snRNA-associated Sm-like protein LSm1 OS=Homo sapiens GN=LSM1 PE=1 SV=1	1	1	5	37000000	49000000	41000000	39000000	24000000		43000000	26000000	0.604651	-0.725825	0.20425	0.689837	12000000	31500000	0.27907	0.732558	-1.8413	-0.448985	3	FALSE	FALSE	TRUE	4	411	0.973236	Tnon_mito	CASM|YJL124C|O15116	ENSG00000175324
GEMIN7	Gem-associated protein 7 OS=Homo sapiens GN=GEMIN7 PE=1 SV=1	1	1	1		5400000					2700000	0	0		0.5	0.30103	0	0	0	0			0	FALSE	FALSE	FALSE	0	411	0	Tnon_mito	SIP3|Q9H840	ENSG00000142252
HDDC3	Guanosine-3',5'-bis(diphosphate) 3'-pyrophosphohydrolase MESH1 OS=Homo sapiens GN=HDDC3 PE=1 SV=3	1	1	1		13000000					6500000	0	0		0.5	0.30103	0	0	0	0			0	FALSE	FALSE	FALSE	0	411	0	Tnon_mito	(ppGpp)ase|MESH1|Q8N4P3	ENSG00000184508
RPL35A	60S ribosomal protein L35a OS=Homo sapiens GN=RPL35A PE=1 SV=2	3	3	27	360000000	96000000	260000000	86000000	160000000	82000000	228000000	147000000	0.644737	-0.633218	0.648912	0.187814	121000000	123000000	0.530702	0.539474	-0.914027	-0.890376	4	FALSE	TRUE	TRUE	108	411	26.2774	Tmito	DBA5|L35A|P18077	ENSG00000182899
UFM1	Ubiquitin-fold modifier 1 OS=Homo sapiens GN=UFM1 PE=1 SV=1	1	1	1		19000000					9500000	0	0		0.5	0.30103	0	0	0	0			0	FALSE	FALSE	FALSE	4	411	0.973236	Tnon_mito	BM-002|C13orf20|P61960	ENSG00000120686
ARPC5L	Actin-related protein 2/3 complex subunit 5-like protein OS=Homo sapiens GN=ARPC5L PE=1 SV=1	3	3	7	24000000	32000000	19000000	23000000	35000000	22000000	28000000	24750000	0.883929	-0.177998	0.590628	0.228686	28500000	29000000	1.01786	1.03571	0.0255351	0.0506261	4	FALSE	TRUE	TRUE	3	411	0.729927	Tnon_mito	ARC16-2|Q9BPX5	ENSG00000136950
SEPT7	Septin-7 OS=Homo sapiens GN=SEPT7 PE=1 SV=2	10	11	83	170000000	170000000	190000000	220000000	140000000	150000000	170000000	175000000	1.02941	0.0418202	0.804317	0.0945726	145000000	180000000	0.852941	1.05882	-0.229482	0.0824622	4	FALSE	TRUE	TRUE	70	411	17.0316	Tnon_mito	CDC10|CDC3|NBLA02942|SEPT7A|Q16181	ENSG00000122545
MLLT4	Isoform 5 of Afadin OS=Homo sapiens GN=MLLT4	7	7	18	23000000	29000000	18000000	20000000	12000000	17000000	26000000	16750000	0.644231	-0.634351	0.137531	0.861598	14500000	16000000	0.557692	0.615385	-0.842459	-0.70044	4	FALSE	TRUE	TRUE	25	411	6.08273	Tnon_mito	AF6|RP3-431P23.3|P55196	ENSG00000130396
NCL	Nucleolin OS=Homo sapiens GN=NCL PE=1 SV=3	15	15	245	1500000000	1200000000	1100000000	1100000000	910000000	1100000000	1350000000	1052500000	0.77963	-0.359139	0.275392	0.560048	1005000000	1005000000	0.744444	0.744444	-0.425764	-0.425764	4	FALSE	TRUE	TRUE	261	411	63.5036	Tnon_mito	C23|P19338	ENSG00000115053
PRKCSH	Glucosidase 2 subunit beta OS=Homo sapiens GN=PRKCSH PE=2 SV=1	13	13	156	470000000	350000000	520000000	640000000	430000000	400000000	410000000	497500000	1.21341	0.279073	0.365754	0.43681	415000000	535000000	1.0122	1.30488	0.0174874	0.383915	4	FALSE	TRUE	TRUE	75	411	18.2482	Tnon_mito	AGE-R2|G19P1|PCLD|PKCSH|PLD1|P14314	ENSG00000130175
ST13	Hsc70-interacting protein OS=Homo sapiens GN=ST13 PE=1 SV=2	9	9	44	430000000	310000000	200000000	260000000	220000000	190000000	370000000	217500000	0.587838	-0.76651	0.221018	0.655573	205000000	240000000	0.554054	0.648649	-0.851901	-0.624491	4	FALSE	TRUE	TRUE	83	411	20.1946	Tnon_mito	AAG2|FAM10A1|FAM10A4|HIP|HOP|HSPABP|HSPABP1|P48|PRO0786|SNC6|P50502	ENSG00000100380
ARPC1B	Actin-related protein 2/3 complex subunit 1B OS=Homo sapiens GN=ARPC1B PE=1 SV=3	2	3	5	33000000			23000000			16500000	5750000	0.348485	-1.52083	0.63126	0.199791	0	11500000	0	0.69697		-0.520832	1	FALSE	TRUE	TRUE	9	411	2.18978	Tnon_mito	ARC41|p40-ARC|p41-ARC|O15143	ENSG00000130429
ERLIN2	Erlin-2 OS=Homo sapiens GN=ERLIN2 PE=1 SV=1	4	6	22	53000000	25000000	19000000	41000000	42000000	50000000	39000000	38000000	0.974359	-0.0374747	0.956178	0.0194612	46000000	41500000	1.17949	1.0641	0.23816	0.0896372	4	FALSE	TRUE	TRUE	45	411	10.9489	Tnon_mito	C8orf2|Erlin-2|NET32|SPFH2|SPG18|O94905	ENSG00000147475
MACF1	Microtubule-actin cross-linking factor 1, isoforms 1/2/3/5 OS=Homo sapiens GN=MACF1 PE=2 SV=1	4	4	12	11000000	9100000	13000000	18000000	11000000	15000000	10050000	14250000	1.41791	0.503766	0.0770447	1.11326	13000000	14500000	1.29353	1.44279	0.371316	0.528857	4	FALSE	TRUE	TRUE	39	411	9.48905	Tnon_mito	ABP620|ACF7|MACF|OFC4|Q9UPN3	ENSG00000127603
PSAT1	Phosphoserine aminotransferase OS=Homo sapiens GN=PSAT1 PE=1 SV=2	5	5	8	58000000	50000000			12000000		54000000	3000000	0.0555556	-4.16993	0.00671329	2.17306	6000000	6000000	0.111111	0.111111	-3.16993	-3.16993	1	TRUE	TRUE	TRUE	20	411	4.86618	Tnon_mito	EPIP|PSA|PSAT|Q9Y617	ENSG00000135069
AHNAK	Neuroblast differentiation-associated protein AHNAK OS=Homo sapiens GN=AHNAK PE=1 SV=2	8	8	15	39000000	51000000	25000000	46000000	46000000	28000000	45000000	36250000	0.805556	-0.311944	0.370965	0.430667	37000000	46000000	0.822222	1.02222	-0.2824	0.0317089	4	FALSE	TRUE	TRUE	62	411	15.0852	Tnon_mito	AHNAKRS|Q09666	ENSG00000124942
APRT	Adenine phosphoribosyltransferase OS=Homo sapiens GN=APRT PE=1 SV=2	5	5	18	110000000	56000000	10000000	24000000	25000000		83000000	14750000	0.177711	-2.4924	0.226467	0.644995	12500000	24500000	0.150602	0.295181	-2.73118	-1.76033	3	FALSE	TRUE	TRUE	25	411	6.08273	Tnon_mito	AMP|APRTD|P07741	ENSG00000198931
CSTB	Cystatin-B OS=Homo sapiens GN=CSTB PE=1 SV=2	3	3	10	170000000	250000000	92000000	17000000	30000000	95000000	210000000	58500000	0.278571	-1.84388	0.108953	0.962761	62500000	23500000	0.297619	0.111905	-1.74846	-3.15966	4	FALSE	TRUE	TRUE	43	411	10.4623	Tnon_mito	CST6|EPM1|EPM1A|PME|STFB|ULD|P04080	ENSG00000160213
CTSZ	Cathepsin Z OS=Homo sapiens GN=CTSZ PE=1 SV=1	1	1	1					12000000		0	3000000	100	6.64386	0.391002	0.407821	6000000	6000000	100	100	6.64386	6.64386	1	FALSE	FALSE	FALSE	10	411	2.43309	Tnon_mito	CTSX|Q9UBR2	ENSG00000101160
FLNA	Filamin-A OS=Homo sapiens GN=FLNA PE=1 SV=4	54	59	304	170000000	130000000	140000000	160000000	110000000	130000000	150000000	135000000	0.9	-0.152003	0.589758	0.229326	120000000	135000000	0.8	0.9	-0.321928	-0.152003	4	FALSE	TRUE	TRUE	226	411	54.9878	Tnon_mito	ABP-280|ABPX|CSBS|CVD1|FLN|FLN-A|FLN1|FMD|MNS|NHBP|OPD|OPD1|OPD2|XLVD|XMVD|P21333	ENSG00000196924
HEXB	Beta-hexosaminidase subunit beta OS=Homo sapiens GN=HEXB PE=1 SV=3	7	8	26	59000000	36000000	60000000	99000000	44000000	61000000	47500000	66000000	1.38947	0.474539	0.339887	0.468666	52500000	71500000	1.10526	1.50526	0.14439	0.590016	4	FALSE	TRUE	TRUE	7	411	1.70316	Tnon_mito	ENC-1AS|HEL-248|P07686	ENSG00000049860
TPM4	Tropomyosin alpha-4 chain OS=Homo sapiens GN=TPM4 PE=1 SV=3	5	6	21	45000000	39000000	37000000	55000000	37000000	39000000	42000000	42000000	1	0	1	0	38000000	46000000	0.904762	1.09524	-0.14439	0.131245	4	FALSE	TRUE	TRUE	127	411	30.9002	Tnon_mito	HEL-S-108|P67936	ENSG00000167460
SEC61B	Protein transport protein Sec61 subunit beta OS=Homo sapiens GN=SEC61B PE=1 SV=2	3	3	18	69000000	52000000	120000000	120000000	90000000	140000000	60500000	117500000	1.94215	0.957654	0.0167601	1.77572	115000000	105000000	1.90083	1.73554	0.926627	0.795382	4	TRUE	TRUE	TRUE	35	411	8.51582	Tnon_mito	P60468	ENSG00000106803
SEC61G	Protein transport protein Sec61 subunit gamma OS=Homo sapiens GN=SEC61G PE=1 SV=1	1	1	7	38000000	54000000	64000000	73000000	33000000	37000000	46000000	51750000	1.125	0.169925	0.676962	0.169436	35000000	53000000	0.76087	1.15217	-0.394279	0.204358	4	FALSE	FALSE	TRUE	2	411	0.486618	Tnon_mito	SSS1|P60059	ENSG00000132432
TXNDC17	Thioredoxin domain-containing protein 17 OS=Homo sapiens GN=TXNDC17 PE=1 SV=1	3	3	8	80000000	44000000	34000000	43000000		29000000	62000000	26500000	0.427419	-1.22628	0.255016	0.593432	14500000	21500000	0.233871	0.346774	-2.09622	-1.52793	3	FALSE	TRUE	TRUE	8	411	1.94647	Tnon_mito	TRP14|TXNL5|Q9BRA2	ENSG00000129235
IFT20	Isoform 2 of Intraflagellar transport protein 20 homolog OS=Homo sapiens GN=IFT20	1	1	1		6800000					3400000	0	0		0.5	0.30103	0	0	0	0			0	FALSE	FALSE	FALSE	0	411	0	Tnon_mito	Q8IY31	ENSG00000109083
ATP1A2	Sodium/potassium-transporting ATPase subunit alpha-2 OS=Homo sapiens GN=ATP1A2 PE=1 SV=1	1	7	46		42000000	16000000	22000000	40000000		21000000	19500000	0.928571	-0.106915	0.955611	0.0197187	20000000	31000000	0.952381	1.47619	-0.0703893	0.561879	3	FALSE	TRUE	TRUE	94	411	22.871	Tnon_mito	FHM2|MHP2|P50993	ENSG00000018625
ATP6V1C1	V-type proton ATPase subunit C 1 OS=Homo sapiens GN=ATP6V1C1 PE=1 SV=4	2	2	4		20000000	23000000			11000000	10000000	8500000	0.85	-0.234465	0.909657	0.0411226	5500000	0	0.55	0	-0.862496		2	FALSE	FALSE	FALSE	0	411	0	Tnon_mito	ATP6C|ATP6D|VATC|Vma5|P21283	ENSG00000155097
AP2M1	AP-2 complex subunit mu OS=Homo sapiens GN=AP2M1 PE=2 SV=1	1	1	2			16000000			17000000	0	8250000	100	6.64386	0.181982	0.739971	8500000	0	100	0	6.64386		2	FALSE	FALSE	FALSE	21	411	5.10949	Tpossible_mito	AP50|CLAPM1|mu2|Q96CW1	ENSG00000161203
DPY30	Protein dpy-30 homolog OS=Homo sapiens GN=DPY30 PE=1 SV=1	2	2	6		68000000	37000000	27000000	32000000		34000000	24000000	0.705882	-0.5025	0.818753	0.0868469	16000000	29500000	0.470588	0.867647	-1.08746	-0.20482	3	FALSE	FALSE	TRUE	43	411	10.4623	Tnon_mito	Cps25|HDPY-30|Saf19|Q9C005	ENSG00000162961
DGAT1	Diacylglycerol O-acyltransferase 1 OS=Homo sapiens GN=DGAT1 PE=1 SV=2	1	1	1	90000000						45000000	0	0		0.5	0.30103	0	0	0	0			0	FALSE	FALSE	FALSE	0	411	0	Tnon_mito	ARAT|ARGP1|DGAT|O75907	ENSG00000185000
NF1	Neurofibromin OS=Homo sapiens GN=NF1 PE=1 SV=2	3	3	6	21000000	13000000	8000000	10000000	6200000		17000000	6050000	0.355882	-1.49053	0.166152	0.779493	3100000	8100000	0.182353	0.476471	-2.45519	-1.06954	3	FALSE	TRUE	TRUE	8	411	1.94647	Tnon_mito	NFNS|VRNF|WSS|P21359	ENSG00000196712
ARL1	ADP-ribosylation factor-like protein 1 OS=Homo sapiens GN=ARL1 PE=2 SV=1	1	1	2	38000000		15000000				19000000	3750000	0.197368	-2.34104	0.567394	0.246115	0	0	0	0			1	FALSE	FALSE	FALSE	28	411	6.81265	Tnon_mito	ARFL1|P40616	ENSG00000120805
GSK3B	Isoform 2 of Glycogen synthase kinase-3 beta OS=Homo sapiens GN=GSK3B	1	1	4	27000000		18000000	22000000	20000000		13500000	15000000	1.11111	0.152003	0.930915	0.0310898	10000000	21000000	0.740741	1.55556	-0.432959	0.63743	3	FALSE	FALSE	FALSE	1	411	0.243309	Tnon_mito	P49841	ENSG00000082701
MCM4	DNA replication licensing factor MCM4 OS=Homo sapiens GN=MCM4 PE=1 SV=5	14	14	44	99000000	120000000	36000000	51000000	58000000	41000000	109500000	46500000	0.424658	-1.23563	0.0604649	1.2185	49500000	54500000	0.452055	0.497717	-1.14543	-1.0066	4	FALSE	TRUE	TRUE	113	411	27.4939	Tnon_mito	CDC21|CDC54|NKCD|NKGCD|P1-CDC21|hCdc21|P33991	ENSG00000104738
PKMYT1	Membrane-associated tyrosine- and threonine-specific cdc2-inhibitory kinase OS=Homo sapiens GN=PKMYT1 PE=2 SV=1	1	1	1	34000000						17000000	0	0		0.5	0.30103	0	0	0	0			0	FALSE	FALSE	FALSE	0	411	0	Tnon_mito	MYT1|Q99640	ENSG00000127564
KHDRBS1	KH domain-containing, RNA-binding, signal transduction-associated protein 1 OS=Homo sapiens GN=KHDRBS1 PE=1 SV=1	4	4	20	69000000	56000000	79000000	50000000	50000000	44000000	62500000	55750000	0.892	-0.164884	0.549126	0.260328	47000000	50000000	0.752	0.8	-0.411195	-0.321928	4	FALSE	TRUE	TRUE	138	411	33.5766	Tnon_mito	Sam68|p62|p68|Q07666	ENSG00000121774
SRSF10	Serine/arginine-rich splicing factor 10 OS=Homo sapiens GN=SRSF10 PE=1 SV=1	2	2	2				33000000		34000000	0	16750000	100	6.64386	0.181761	0.740499	17000000	16500000	100	100	6.64386	6.64386	2	FALSE	FALSE	FALSE	71	411	17.2749	Tnon_mito	FUSIP1|FUSIP2|NSSR|SFRS13|SFRS13A|SRp38|SRrp40|TASR|TASR1|TASR2|O75494	ENSG00000188529
KIF2C	Kinesin-like protein KIF2C OS=Homo sapiens GN=KIF2C PE=1 SV=2	3	3	5	13000000		20000000	17000000	30000000		6500000	16750000	2.57692	1.36565	0.341017	0.467224	15000000	23500000	2.30769	3.61538	1.20645	1.85415	3	FALSE	TRUE	TRUE	23	411	5.59611	Tnon_mito	CT139|KNSL6|MCAK|Q99661	ENSG00000142945
PRPF6	Pre-mRNA-processing factor 6 OS=Homo sapiens GN=PRPF6 PE=1 SV=1	1	1	4	26000000	20000000			16000000	18000000	23000000	8500000	0.369565	-1.4361	0.0658737	1.18129	17000000	8000000	0.73913	0.347826	-0.436099	-1.52356	2	FALSE	FALSE	FALSE	92	411	22.3844	Tpossible_mito	ANT-1|ANT1|C20orf14|Prp6|RP60|SNRNP102|TOM|U5-102K|hPrp6|O94906	ENSG00000101161
TRA2A	Transformer-2 protein homolog alpha OS=Homo sapiens GN=TRA2A PE=1 SV=1	1	1	1	19000000						9500000	0	0		0.5	0.30103	0	0	0	0			0	FALSE	FALSE	FALSE	64	411	15.5718	Tnon_mito	AWMS1|HSU53209|Q13595	ENSG00000164548
SF3B6	Splicing factor 3B subunit 6 OS=Homo sapiens GN=SF3B6 PE=1 SV=1	3	3	11	63000000	45000000	39000000	61000000	42000000		54000000	35500000	0.657407	-0.60514	0.304601	0.516269	21000000	51500000	0.388889	0.953704	-1.36257	-0.068387	3	FALSE	TRUE	TRUE				Tnon_mito	HSPC175|Ht006|P14|SAP14|SAP14a|SF3B14|SF3B14a|Q9Y3B4	ENSG00000115128
ALKBH5	RNA demethylase ALKBH5 OS=Homo sapiens GN=ALKBH5 PE=1 SV=2	6	6	17	15000000	12000000	20000000	14000000	17000000	23000000	13500000	18500000	1.37037	0.454566	0.116611	0.933259	20000000	15500000	1.48148	1.14815	0.567041	0.199309	4	FALSE	TRUE	TRUE	12	411	2.91971	Tnon_mito	ABH5|OFOXD|OFOXD1|Q6P6C2	ENSG00000091542
ELP2	Isoform 6 of Elongator complex protein 2 OS=Homo sapiens GN=ELP2	1	1	3	15000000	15000000			10000000		15000000	2500000	0.166667	-2.58496	0.0153924	1.81269	5000000	5000000	0.333333	0.333333	-1.58496	-1.58496	1	TRUE	FALSE	FALSE	4	411	0.973236	Tnon_mito	SHINC-2|STATIP1|StIP|Q6IA86	ENSG00000134759
RBM25	RNA-binding protein 25 OS=Homo sapiens GN=RBM25 PE=1 SV=3	2	2	10	14000000	21000000	24000000	38000000	18000000	19000000	17500000	24750000	1.41429	0.500074	0.282958	0.548277	18500000	28000000	1.05714	1.6	0.0801703	0.678072	4	FALSE	FALSE	TRUE	77	411	18.7348	Tnon_mito	NET52|RED120|RNPC7|S164|Snu71|fSAP94|P49756	ENSG00000119707
CEP41	Centrosomal protein of 41 kDa OS=Homo sapiens GN=CEP41 PE=1 SV=1	1	1	4	6500000	6700000	6200000	5700000			6600000	2975000	0.450758	-1.14958	0.125572	0.901107	0	2850000	0	0.431818		-1.2115	2	FALSE	FALSE	FALSE	1	411	0.243309	Tnon_mito	JBTS15|TSGA14|Q9BYV8	ENSG00000106477
PSMD8	26S proteasome non-ATPase regulatory subunit 8 OS=Homo sapiens GN=PSMD8 PE=1 SV=2	5	5	25	83000000	58000000	41000000	56000000	28000000	27000000	70500000	38000000	0.539007	-0.891624	0.177715	0.750276	27500000	42000000	0.390071	0.595745	-1.35819	-0.747234	4	FALSE	TRUE	TRUE	44	411	10.7056	Tnon_mito	HEL-S-91n|HIP6|HYPF|Nin1p|Rpn12|S14|p31|P48556	ENSG00000099341
CRLF3	Cytokine receptor-like factor 3 OS=Homo sapiens GN=CRLF3 PE=1 SV=2	2	2	3	6700000		6300000	8600000			3350000	3725000	1.11194	0.153079	0.934266	0.0295294	0	4300000	0	1.28358		0.360176	2	FALSE	FALSE	FALSE	0	411	0	Tnon_mito	CREME-9|CREME9|CRLM9|CYTOR4|FRWS|p48.2|Q8IUI8	ENSG00000176390
FAM160B2	Protein FAM160B2 OS=Homo sapiens GN=FAM160B2 PE=2 SV=2	1	1	1					320000000		0	80000000	100	6.64386	0.391002	0.407821	160000000	160000000	100	100	6.64386	6.64386	1	FALSE	FALSE	FALSE	0	411	0	Tnon_mito	RAI16|Q86V87	ENSG00000158863
CHD4	Isoform 2 of Chromodomain-helicase-DNA-binding protein 4 OS=Homo sapiens GN=CHD4	7	7	12	23000000	18000000	30000000	24000000		11000000	20500000	16250000	0.792683	-0.335184	0.587526	0.230973	5500000	12000000	0.268293	0.585366	-1.89812	-0.77259	3	FALSE	TRUE	TRUE	80	411	19.4647	Tnon_mito	Mi-2b|Mi2-BETA|Q14839	ENSG00000111642
DHX15	Putative pre-mRNA-splicing factor ATP-dependent RNA helicase DHX15 OS=Homo sapiens GN=DHX15 PE=1 SV=2	12	12	35	41000000	55000000	250000000	38000000	370000000		48000000	164500000	3.42708	1.77698	0.276901	0.557676	185000000	204000000	3.85417	4.25	1.94642	2.08746	3	FALSE	TRUE	TRUE	168	411	40.8759	Tnon_mito	DBP1|DDX15|HRH2|PRP43|PRPF43|PrPp43p|O43143	ENSG00000109606
MARK2	Serine/threonine-protein kinase MARK2 OS=Homo sapiens GN=MARK2 PE=1 SV=2	2	2	4	33000000		14000000	16000000		17000000	16500000	11750000	0.712121	-0.489805	0.822396	0.0849189	8500000	8000000	0.515152	0.484848	-0.956931	-1.04439	3	FALSE	FALSE	FALSE	6	411	1.45985	Tnon_mito	EMK-1|EMK1|PAR-1|Par-1b|Par1b|Q7KZI7	ENSG00000072518
HNRNPU	Heterogeneous nuclear ribonucleoprotein U OS=Homo sapiens GN=HNRNPU PE=1 SV=6	24	24	292	1400000000	910000000	1100000000	1400000000	1200000000	1300000000	1155000000	1250000000	1.08225	0.114035	0.765373	0.116127	1250000000	1300000000	1.08225	1.12554	0.114035	0.170619	4	FALSE	TRUE	TRUE	280	411	68.1265	Tnon_mito	HNRPU|SAF-A|U21.1|hnRNP U|Q00839	ENSG00000153187
PIK3R1	Isoform 4 of Phosphatidylinositol 3-kinase regulatory subunit alpha OS=Homo sapiens GN=PIK3R1	1	1	1			75000000				0	18750000	100	6.64386	0.391002	0.407821	0	0	0	0			1	FALSE	FALSE	FALSE	5	411	1.21655	Tnon_mito	AGM7|GRB1|p85|p85-ALPHA|P27986	ENSG00000145675
SRSF2	Serine/arginine-rich splicing factor 2 OS=Homo sapiens GN=SRSF2 PE=1 SV=4	3	3	12	140000000	86000000	86000000	130000000	53000000	64000000	113000000	83250000	0.736726	-0.440801	0.456208	0.340837	58500000	91500000	0.517699	0.809735	-0.949814	-0.304479	4	FALSE	TRUE	TRUE	135	411	32.8467	Tnon_mito	PR264|SC-35|SC35|SFRS2|SFRS2A|SRp30b|Q01130	ENSG00000161547
RAB9A	Ras-related protein Rab-9A OS=Homo sapiens GN=RAB9A PE=1 SV=1	2	2	2		22000000					11000000	0	0		0.5	0.30103	0	0	0	0			0	FALSE	FALSE	FALSE	4	411	0.973236	Tnon_mito	RAB9|P51151	ENSG00000123595
RBM39	RNA-binding protein 39 OS=Homo sapiens GN=RBM39 PE=1 SV=2	4	4	13	54000000	30000000	38000000	45000000	39000000	38000000	42000000	40000000	0.952381	-0.0703893	0.895073	0.0481417	38500000	42000000	0.916667	1	-0.125531	0	4	FALSE	TRUE	TRUE	163	411	39.6594	Tnon_mito	CAPER|CAPERalpha|FSAP59|HCC1|RNPC2|Q14498	ENSG00000131051
PPIE	Isoform 3 of Peptidyl-prolyl cis-trans isomerase E OS=Homo sapiens GN=PPIE	2	3	6	37000000	46000000	36000000	30000000			41500000	16500000	0.39759	-1.33065	0.0796161	1.099	0	15000000	0	0.361446		-1.46815	2	FALSE	TRUE	TRUE	10	411	2.43309	Tnon_mito	CYP-33|CYP33|Q9UNP9	ENSG00000084072
RNPS1	RNA-binding protein with serine-rich domain 1 OS=Homo sapiens GN=RNPS1 PE=1 SV=1	1	1	6	58000000	32000000	43000000	36000000	29000000	33000000	45000000	35250000	0.783333	-0.352302	0.588331	0.230378	31000000	32500000	0.688889	0.722222	-0.537657	-0.469485	4	FALSE	FALSE	TRUE	109	411	26.5207	Tnon_mito	E5.1|Q15287	ENSG00000205937
RAB32	Ras-related protein Rab-32 OS=Homo sapiens GN=RAB32 PE=1 SV=3	1	1	1				19000000			0	4750000	100	6.64386	0.391002	0.407821	0	9500000	0	100		6.64386	1	FALSE	FALSE	FALSE	6	411	1.45985	Tmito	Q13637	ENSG00000118508
NISCH	Nischarin OS=Homo sapiens GN=NISCH PE=1 SV=3	1	1	2		19000000		25000000			9500000	6250000	0.657895	-0.604071	0.802742	0.0954239	0	12500000	0	1.31579		0.395929	1	FALSE	FALSE	FALSE	4	411	0.973236	Tnon_mito	I-1|IR1|IRAS|hIRAS|Q9Y2I1	ENSG00000010322
SEC23IP	SEC23-interacting protein OS=Homo sapiens GN=SEC23IP PE=1 SV=1	3	3	5	55000000		32000000	26000000		42000000	27500000	25000000	0.909091	-0.137504	0.943099	0.0254428	21000000	13000000	0.763636	0.472727	-0.389042	-1.08092	3	FALSE	TRUE	TRUE	19	411	4.62287	Tnon_mito	P125|P125A|Q9Y6Y8	ENSG00000107651
ATXN2L	Ataxin-2-like protein OS=Homo sapiens GN=ATXN2L PE=1 SV=2	9	9	32	99000000	62000000	79000000	70000000	77000000	87000000	80500000	78250000	0.97205	-0.040898	0.923264	0.0346741	82000000	73500000	1.01863	0.913043	0.0266351	-0.131245	4	FALSE	TRUE	TRUE	127	411	30.9002	Tnon_mito	A2D|A2LG|A2LP|A2RP|Q8WWM7	ENSG00000168488
SCRIB	Isoform 3 of Protein scribble homolog OS=Homo sapiens GN=SCRIB	4	4	5	23000000			44000000			11500000	11000000	0.956522	-0.0641303	0.976993	0.0101083	0	22000000	0	1.91304		0.93587	1	FALSE	TRUE	TRUE	35	411	8.51582	Tnon_mito	CRIB1|SCRB1|SCRIB1|Vartul|Q14160	ENSG00000180900
NKIRAS2	NF-kappa-B inhibitor-interacting Ras-like protein 2 OS=Homo sapiens GN=NKIRAS2 PE=2 SV=1	2	2	4	12000000	7500000			10000000		9750000	2500000	0.25641	-1.96347	0.111586	0.95239	5000000	5000000	0.512821	0.512821	-0.963474	-0.963474	1	FALSE	FALSE	FALSE	2	411	0.486618	Tnon_mito	KBRAS2|kappaB-Ras2|Q9NYR9	ENSG00000168256
SH3GLB1	Isoform 2 of Endophilin-B1 OS=Homo sapiens GN=SH3GLB1	5	5	13	26000000	53000000	25000000	31000000	41000000	22000000	39500000	29750000	0.753165	-0.408963	0.59941	0.222276	31500000	36000000	0.797468	0.911392	-0.326501	-0.133856	4	FALSE	TRUE	TRUE	5	411	1.21655	Tpossible_mito	Bif-1|PPP1R70|dJ612B15.2|Q9Y371	ENSG00000097033
ARHGAP17	Rho GTPase-activating protein 17 OS=Homo sapiens GN=ARHGAP17 PE=1 SV=1	4	4	10	27000000	26000000	25000000	20000000	18000000		26500000	15750000	0.59434	-0.750641	0.142873	0.845051	9000000	19000000	0.339623	0.716981	-1.558	-0.479993	3	FALSE	TRUE	TRUE	3	411	0.729927	Tnon_mito	MST066|MST110|MSTP038|MSTP066|MSTP110|NADRIN|PP367|PP4534|RICH-1|RICH1|WBP15|Q68EM7	ENSG00000140750
YTHDC2	Probable ATP-dependent RNA helicase YTHDC2 OS=Homo sapiens GN=YTHDC2 PE=1 SV=2	2	2	6		19000000	19000000	21000000	13000000		9500000	13250000	1.39474	0.479993	0.766494	0.115491	6500000	17000000	0.684211	1.78947	-0.547488	0.839535	3	FALSE	FALSE	TRUE	42	411	10.219	Tnon_mito	CAHL|Q9H6S0	ENSG00000047188
ITCH	E3 ubiquitin-protein ligase Itchy homolog OS=Homo sapiens GN=ITCH PE=1 SV=2	1	1	3			3900000		3600000	4300000	0	2950000	100	6.64386	0.0591339	1.22816	3950000	1800000	100	100	6.64386	6.64386	3	FALSE	FALSE	FALSE	2	411	0.486618	Tnon_mito	AIF4|AIP4|NAPP1|dJ468O1.1|Q96J02	ENSG00000078747
DHX57	Putative ATP-dependent RNA helicase DHX57 OS=Homo sapiens GN=DHX57 PE=1 SV=2	1	1	1		43000000					21500000	0	0		0.5	0.30103	0	0	0	0			0	FALSE	FALSE	FALSE	14	411	3.40633	Tnon_mito	DDX57|Q6P158	ENSG00000163214
COMMD3-BMI1	Protein COMMD3-BMI1 OS=Homo sapiens GN=COMMD3-BMI1 PE=4 SV=1	1	1	5	22000000	44000000	39000000	55000000		21000000	33000000	28750000	0.871212	-0.198904	0.808475	0.0923332	10500000	27500000	0.318182	0.833333	-1.65208	-0.263034	3	FALSE	FALSE	TRUE	0	411	0	Tnon_mito	R4GMX3	ENSG00000269897
[truncated: 1,623 more rows]

## Sheet: ISD11PullDown_MitoHits
Gene	Protein Description	# Unique Peptides	# Peptides	# PSMs	Areas: Control -1	Areas: Control -2	Areas: BioRep1- (Injection1)	Areas: BioRep1 (Injection2)	Areas: BioRep2 (Injection1)	Areas: BioRep2 (Injection2)	Avg Areas - Control Samples	Avg Areas - Samples	Fold Change (Sample/Control)	Log2 Fold Change (FC)	p-Value	NegLog10 Pval	Avg Sample_BR1	Avg Sample _BR2	Fold Change_BR1	Fold Change_BR2	Log2_FoldChange_BR1	Log2_FoldChange_BR2	Detected in # Injections	Is pval<0.05?	>3 Unq Peptides?	>5 PSMs?	# Datasets protein found in Crapome	Total Crapome Datasets	% Crapome Probability	MitoCarta2.0 Dataset Annotation	Protein Synonyms	EnsemblGeneID
[truncated: 10 more rows]

[truncated: 1 more sheets: ISD11PullDown_NonMito Hits]
