# Supplementary material for: 4′-Phosphopantetheine and long acyl chain-dependent interactions are integral to human mitochondrial acyl carrier protein function
Source: Royal Society of Chemistry journal article supplement (doi:10.1039/c8md00489g), 2019-01-01
Supplement: c8md00489g4.xlsx [file c8md00489g4.xlsx]

## Sheet: S112A-ACPM-All DetectedProteins
	LEGEND
	Gene - Represents gene name for protein								Avg Areas - Control Samples - Avg Areas of allcontrol injections									Log2_FoldChange_BR1&2 - Log(base2) value for BR1&2 fold change
	Protein Description - Description of protein								Avg Areas - Samples - Avg Areas of all biological replicates									Log2_FoldChange_BR3&4 - Log(base2) value for BR3&4 fold change
	# Unique Peptides - Number of unique peptides detected for particular protein								Fold Change (Sample/Control) - Ratio of Avg Sample/Avg Control									Detected in # Injections - Times a protein was detected in the sample injections
	# Peptides - Number of total peptides detected for a protein (including shared ones)								p-Value - p-value od determined by the student's t-test									Is pValue <= 0.05? - True or false argument for significance of pvalue
	#PSMs - Number of Peptide Spectral Matches for specific protein								NegLog10Pval - Negative log (base10) value of the p-value									> 3 Unique peptides? - True or false argument for protein having at least 3 unique peptides
	Areas: BioRep1-Inj1 - Total protein area in control sample 1, Inj1								Avg Sample_BR1&2 - Avg areas for BR1&2 (all injections)									> 5 PSMs? - True or false argument for a protein having at least 5 peptide spectral matches
	Areas: BioRep1-Inj2 - Total protein area in control sample 1, Inj2								Avg Sample_BR3&4 - Avg areas for BR3&4 (all injections)									# Datasets protein found in Crapome - How many times is a protein detected as a contaminant in the crapome respostory?
	Areas: BioRep2-Inj1 - Total protein area in control sample 1, Inj3								Avg Fold Change_BR1&2 - Ratio of Avg areas for BR1&2/Avg Control									Total Crapome Datasets - Total number of affinity purification datasets in the crapome repository
	Areas: BioRep2-Inj2 - Total protein area in control sample 1, Inj4								Avg Fold Change_BR2&3 - Ratio of Avg areas for BR2&3/Avg Control									% Crapome probability - Percentage of the ratio of columsn AB and AC
	Areas: BioRep1 - Injection 1 - Total protein area in 1st biological replicate, Injection 1																	MitoCarta2.0 Dataset Annotation - How is a protein defined by the MitoCarts 2.0 database?
	Areas: BioRep1 - Injection 2 - Total protein area in 1st biological replicate, Injection 2																	Protein Synonyms - All synonyms for the protein
	Areas: BioRep2 - Injection 1 - Total protein area in 2nd biological replicate, Injection 1																	EnsemblGeneID - The Ensenbl gene ID
	Areas: BioRep2 - Injection 2 - Total protein area in 2nd biological replicate, Injection 2
	Areas: BioRep3 - Injection 1 - Total protein area in 3rd biological replicate, Injection 1
	Areas: BioRep3 - Injection 2 - Total protein area in 3rd biological replicate, Injection 2
	Areas: BioRep4 - Injection 1 - Total protein area in 4th biological replicate, Injection 1
	Areas: BioRep4 - Injection 2 - Total protein area in 4th biological replicate, Injection 6
Gene	Protein Description	# Unique Peptides	# Peptides	# PSMs	Areas: Control -BioRep1-Inj1	Areas: Control -BioRep1-Inj2	Areas: Control -BioRep2-Inj1	Areas: Control -BioRep2-Inj2	Areas: BioRep1- (Injection1)	Areas: BioRep1 (Injection2)	Areas: BioRep2 (Injection1)	Areas: BioRep2 (Injection2)	Areas: BioRep3- (Injection1)	Areas: BioRep3 (Injection2)	Areas: BioRep4 (Injection1)	Areas: BioRep4 (Injection2)	Avg Areas - Control Samples	Avg Areas - Samples	Fold Change (Sample/Control)	p-Value	Neg Log10 p-Value	Avg Areas - BioRep1&2	Avg Areas - BioRep3&4	Avg Fold Change_BR1&2	Avg Fold Change_BR3&4	Log2_FoldChange_BR1&2	Log2_FoldChange_BR3&4	Detected in # Injections (Sample Only)	Is pval<0.05?	>3 Unq Peptides?	>5 PSMs?	# Datasets protein found in Crapome	Total Crapome Datasets	% Crapome Probability	MitoCarta2.0 Dataset Annotation	Protein Synonyms	EnsemblGeneID
CYC1	Cytochrome c1, heme protein, mitochondrial OS=Homo sapiens GN=CYC1 PE=1 SV=3	1	1	1	15000000												15000000	0	0					0	0			0	TRUE	FALSE	FALSE	9	411	2.18978	Tmito	MC3DN6|UQCR4|P08574	ENSG00000179091
SDHB	Succinate dehydrogenase [ubiquinone] iron-sulfur subunit, mitochondrial OS=Homo sapiens GN=SDHB PE=1 SV=3	3	3	15		25000000	6000000			15000000	10000000	13000000	14000000	18000000		17000000	15500000	14500000	0.935484	0.933346	0.0299573	1.63333e+07	1.26667e+07	1.05376	0.817204	0.075551	-0.291231	6	FALSE	TRUE	TRUE	18	411	4.37956	Tmito	CWS2|IP|PGL4|SDH|SDH1|SDH2|SDHIP|P21912	ENSG00000117118
SDHA	Succinate dehydrogenase [ubiquinone] flavoprotein subunit, mitochondrial OS=Homo sapiens GN=SDHA PE=1 SV=2	9	9	71	47000000	40000000	14000000	17000000	15000000	16000000	37000000	20000000	20000000	28000000	71000000	40000000	29500000	30875000	1.04661	0.900105	0.0457066	39750000	22000000	1.34746	0.745763	0.43024	-0.423211	8	FALSE	TRUE	TRUE	44	411	10.7056	Tmito	CMD1GG|FP|PGL5|SDH1|SDH2|SDHF|P31040	ENSG00000073578
UQCRC1	Cytochrome b-c1 complex subunit 1, mitochondrial OS=Homo sapiens GN=UQCRC1 PE=1 SV=3	7	7	21	23000000	21000000	4400000	4700000	13000000		20000000	11000000		12000000	13000000	17000000	13275000	1.43333e+07	1.07972	0.851389	0.0698722	14000000	1.46667e+07	1.05461	1.10483	0.076715	0.143829	6	FALSE	TRUE	TRUE	30	411	7.29927	Tmito	D3S3191|QCR1|UQCR1|P31930	ENSG00000010256
COQ5	2-methoxy-6-polyprenyl-1,4-benzoquinol methylase, mitochondrial OS=Homo sapiens GN=COQ5 PE=1 SV=2	1	1	6	11000000	10000000					7100000	6600000	8000000			8300000	10500000	7500000	0.714286	0.031211	1.50569	8150000	6850000	0.77619	0.652381	-0.365517	-0.616213	4	TRUE	FALSE	TRUE	0	411	0	Tmito	Q5HYK3	ENSG00000110871
PDHA1	Isoform 4 of Pyruvate dehydrogenase E1 component subunit alpha, somatic form, mitochondrial OS=Homo sapiens GN=PDHA1	8	8	27	53000000	47000000	14000000	36000000			18000000	16000000	13000000	16000000	39000000	22000000	37500000	2.06667e+07	0.551111	0.144401	0.84043	22500000	17000000	0.6	0.453333	-0.736966	-1.14136	6	FALSE	TRUE	TRUE	47	411	11.4355	Tmito	PDHA|PDHCE1A|PHE1A|P08559	ENSG00000131828
COQ9	Ubiquinone biosynthesis protein COQ9, mitochondrial OS=Homo sapiens GN=COQ9 PE=1 SV=1	2	2	17	37000000	38000000	18000000	17000000	31000000	30000000	30000000	29000000	32000000	31000000	28000000	36000000	27500000	30875000	1.12273	0.602476	0.220061	31750000	30000000	1.15455	1.09091	0.207325	0.125531	8	FALSE	FALSE	TRUE	0	411	0	Tmito	C16orf49|COQ10D5|O75208	ENSG00000088682
MRPL12	39S ribosomal protein L12, mitochondrial OS=Homo sapiens GN=MRPL12 PE=1 SV=2	1	7	76	48000000		58000000		37000000		49000000	14000000	18000000		42000000	110000000	53000000	45000000	0.849057	0.613486	0.212195	5.66667e+07	3.33333e+07	1.06918	0.628931	0.096508	-0.669027	6	FALSE	TRUE	TRUE	74	411	18.0049	Tmito	5c5-2|L12mt|MRP-L31/34|MRPL7|MRPL7/L12|RPML12|P52815	ENSG00000262814
ATP5D	ATP synthase subunit delta, mitochondrial OS=Homo sapiens GN=ATP5D PE=1 SV=2	3	3	33	49000000	70000000	24000000	27000000	53000000	65000000	66000000	82000000	82000000	100000000	70000000	76000000	42500000	74250000	1.74706	0.0503323	1.29815	82000000	66500000	1.92941	1.56471	0.948161	0.645891	8	FALSE	TRUE	TRUE	21	411	5.10949	Tmito	P30049	ENSG00000099624
COX5A	Cytochrome c oxidase subunit 5A, mitochondrial OS=Homo sapiens GN=COX5A PE=1 SV=2	4	4	33	54000000	59000000			30000000	27000000	70000000	38000000	47000000	40000000	70000000	55000000	56500000	47125000	0.834071	0.181142	0.741982	53000000	41250000	0.938053	0.730088	-0.0922585	-0.453857	8	FALSE	TRUE	TRUE	24	411	5.83942	Tmito	COX|COX-VA|VA|P20674	ENSG00000178741
ISCA2	Iron-sulfur cluster assembly 2 homolog, mitochondrial OS=Homo sapiens GN=ISCA2 PE=1 SV=2	1	1	1											6600000		0	6600000				6600000		100	0	6.64386		1	TRUE	FALSE	FALSE	1	411	0.243309	Tmito	HBLD1|ISA2|c14_5557|Q86U28	ENSG00000165898
PMPCB	Mitochondrial-processing peptidase subunit beta OS=Homo sapiens GN=PMPCB PE=3 SV=1	6	6	28	28000000		8400000	9800000	4700000	5800000	15000000	17000000	13000000	13000000	37000000	15000000	15400000	15062500	0.978084	0.965377	0.0153031	19500000	10625000	1.26623	0.689935	0.340544	-0.535468	8	FALSE	TRUE	TRUE	31	411	7.54258	Tmito	Beta-MPP|MPP11|MPPB|MPPP52|P-52|O75439	ENSG00000105819
ATP5A1	ATP synthase subunit alpha, mitochondrial OS=Homo sapiens GN=ATP5A1 PE=1 SV=1	21	21	263	190000000	190000000	82000000	87000000	120000000	130000000	140000000	120000000	330000000	230000000	170000000	160000000	137250000	175000000	1.27505	0.373414	0.427809	222500000	127500000	1.62113	0.928962	0.696999	-0.106309	8	FALSE	TRUE	TRUE	210	411	51.0949	Tmito	ATP5A|ATP5AL2|ATPM|HEL-S-123m|MC5DN4|MOM2|OMR|ORM|hATP1|P25705	ENSG00000152234
OGDH	2-oxoglutarate dehydrogenase, mitochondrial OS=Homo sapiens GN=OGDH PE=2 SV=1	2	2	4	18000000						8800000			5900000	11000000		18000000	8.56667e+06	0.475926			8450000	8800000	0.469444	0.488889	-1.09097	-1.03242	3	TRUE	FALSE	FALSE	32	411	7.78589	Tmito	AKGDH|E1k|OGDC|Q02218	ENSG00000105953
PDHB	Pyruvate dehydrogenase E1 component subunit beta, mitochondrial OS=Homo sapiens GN=PDHB PE=1 SV=3	6	6	53	55000000	71000000	16000000	13000000	29000000	24000000	29000000	34000000	19000000	36000000	33000000	50000000	38750000	31750000	0.819355	0.664739	0.177349	34500000	29000000	0.890323	0.748387	-0.1676	-0.418143	8	FALSE	TRUE	TRUE	52	411	12.6521	Tmito	PDHBD|PDHE1-B|PHE1B|P11177	ENSG00000168291
UQCRC2	Cytochrome b-c1 complex subunit 2, mitochondrial OS=Homo sapiens GN=UQCRC2 PE=1 SV=3	2	2	11	29000000	35000000			21000000	25000000	21000000	25000000	22000000	24000000	25000000	19000000	32000000	22750000	0.710938	0.178999	0.747148	22500000	23000000	0.703125	0.71875	-0.508147	-0.476438	8	FALSE	FALSE	TRUE	38	411	9.24574	Tmito	MC3DN5|QCR2|UQCR2|P22695	ENSG00000140740
MRPS35	28S ribosomal protein S35, mitochondrial OS=Homo sapiens GN=MRPS35 PE=1 SV=1	2	2	13	19000000	29000000	7900000		11000000	13000000	15000000	11000000	13000000	12000000	15000000	17000000	1.86333e+07	13375000	0.7178	0.479689	0.31904	14250000	12500000	0.764758	0.670841	-0.386924	-0.575958	8	FALSE	FALSE	TRUE	25	411	6.08273	Tmito	MDS023|MRP-S28|MRPS28|P82673	ENSG00000061794
MRPL53	39S ribosomal protein L53, mitochondrial OS=Homo sapiens GN=MRPL53 PE=1 SV=1	2	2	21	43000000	58000000	14000000		23000000	30000000	32000000	46000000	25000000	34000000	28000000	41000000	3.83333e+07	32375000	0.844565	0.692732	0.159435	32000000	32750000	0.834783	0.854348	-0.260528	-0.227105	8	FALSE	FALSE	TRUE	3	411	0.729927	Tmito	L53MT|Q96EL3	ENSG00000204822
MDH2	Malate dehydrogenase, mitochondrial OS=Homo sapiens GN=MDH2 PE=1 SV=3	15	15	312	840000000	330000000	140000000	110000000	140000000	110000000	490000000	170000000	290000000	170000000	450000000	400000000	355000000	277500000	0.78169	0.686538	0.163335	327500000	227500000	0.922535	0.640845	-0.116324	-0.641952	8	FALSE	TRUE	TRUE	103	411	25.0608	Tmito	M-MDH|MDH|MGC:3559|MOR1|P40926	ENSG00000146701
MRPS27	28S ribosomal protein S27, mitochondrial OS=Homo sapiens GN=MRPS27 PE=2 SV=1	17	17	184	120000000	87000000	46000000	59000000	130000000	88000000	160000000	87000000	110000000	120000000	93000000	62000000	78000000	106250000	1.36218	0.202671	0.693208	96250000	116250000	1.23397	1.49038	0.303312	0.575685	8	FALSE	TRUE	TRUE	31	411	7.54258	Tmito	MRP-S27|S27mt|Q92552	ENSG00000113048
CS	Citrate synthase, mitochondrial OS=Homo sapiens GN=CS PE=1 SV=2	11	12	101	88000000	120000000	28000000	32000000	43000000	61000000	62000000	77000000	68000000	100000000	150000000	170000000	67000000	91375000	1.36381	0.409461	0.387787	122000000	60750000	1.8209	0.906716	0.864648	-0.141277	8	FALSE	TRUE	TRUE	90	411	21.8978	Tmito	O75390	ENSG00000062485
GRPEL1	GrpE protein homolog 1, mitochondrial OS=Homo sapiens GN=GRPEL1 PE=1 SV=2	7	7	76	95000000	85000000	24000000	49000000	49000000	44000000	78000000	71000000	54000000	65000000	120000000	72000000	63250000	69125000	1.09289	0.763648	0.117107	77750000	60500000	1.22925	0.956522	0.297777	-0.0641303	8	FALSE	TRUE	TRUE	79	411	19.2214	Tmito	HMGE|Q9HAV7	ENSG00000109519
DLAT	Dihydrolipoyllysine-residue acetyltransferase component of pyruvate dehydrogenase complex, mitochondrial OS=Homo sapiens GN=DLAT PE=1 SV=3	12	12	42	29000000	55000000	10000000	25000000	22000000		28000000	27000000	16000000	30000000	32000000	27000000	29750000	26000000	0.87395	0.719384	0.143039	26250000	2.56667e+07	0.882353	0.862745	-0.180572	-0.212994	7	FALSE	TRUE	TRUE	38	411	9.24574	Tmito	DLTA|PDC-E2|PDCE2|P10515	ENSG00000150768
LRPPRC	Leucine-rich PPR motif-containing protein, mitochondrial OS=Homo sapiens GN=LRPPRC PE=1 SV=3	56	56	387	260000000	180000000	45000000	62000000	56000000	45000000	70000000	51000000	39000000	48000000	53000000	50000000	136750000	51500000	0.3766	0.192368	0.715866	47500000	55500000	0.347349	0.40585	-1.52554	-1.30098	8	FALSE	TRUE	TRUE	130	411	31.6302	Tmito	CLONE-23970|GP130|LRP130|LSFC|P42704	ENSG00000138095
DLST	Dihydrolipoyllysine-residue succinyltransferase component of 2-oxoglutarate dehydrogenase complex, mitochondrial OS=Homo sapiens GN=DLST PE=1 SV=4	2	2	12	25000000	33000000	11000000	13000000	7100000		17000000	25000000	16000000	18000000	19000000	27000000	20500000	1.84429e+07	0.899652	0.73666	0.132733	20000000	1.63667e+07	0.97561	0.798374	-0.0356239	-0.324863	7	FALSE	FALSE	TRUE	57	411	13.8686	Tmito	DLTS|P36957	ENSG00000119689
PDHX	Pyruvate dehydrogenase protein X component, mitochondrial OS=Homo sapiens GN=PDHX PE=1 SV=3	4	4	18	28000000	28000000	6100000	7400000			13000000	7500000			9500000	34000000	17375000	16000000	0.920863	0.879052	0.0559853	21750000	10250000	1.2518	0.589928	0.324002	-0.761389	4	FALSE	TRUE	TRUE	12	411	2.91971	Tmito	DLDBP|E3BP|OPDX|PDX1|proX|O00330	ENSG00000110435
GFM1	Isoform 2 of Elongation factor G, mitochondrial OS=Homo sapiens GN=GFM1	1	1	1												20000000	0	20000000				20000000		100	0	6.64386		1	TRUE	FALSE	FALSE	12	411	2.91971	Tmito	COXPD1|EFG|EFG1|EFGM|EGF1|GFM|hEFG1|Q96RP9	ENSG00000168827
MRPL46	39S ribosomal protein L46, mitochondrial OS=Homo sapiens GN=MRPL46 PE=1 SV=1	3	3	18	20000000	30000000	6900000			17000000	13000000	14000000	12000000	13000000	18000000	21000000	1.89667e+07	1.54286e+07	0.813457	0.65187	0.185839	16000000	1.46667e+07	0.843585	0.773286	-0.245394	-0.370925	7	FALSE	TRUE	TRUE	18	411	4.37956	Tmito	C15orf4|LIECG2|P2ECSL|Q9H2W6	ENSG00000259494
ATP5E	ATP synthase subunit epsilon, mitochondrial OS=Homo sapiens GN=ATP5E PE=1 SV=2	1	1	6	35000000				20000000	25000000			32000000		26000000		35000000	25750000	0.735714			29000000	22500000	0.828571	0.642857	-0.271302	-0.63743	4	TRUE	FALSE	TRUE	1	411	0.243309	Tmito	ATPE|MC5DN3|P56381	ENSG00000124172
SLC25A3	Phosphate carrier protein, mitochondrial OS=Homo sapiens GN=SLC25A3 PE=1 SV=2	1	1	15	60000000	74000000	14000000		38000000	44000000	38000000	41000000	32000000	34000000		46000000	4.93333e+07	39000000	0.790541	0.626752	0.202904	3.73333e+07	40250000	0.756757	0.815878	-0.402098	-0.293574	7	FALSE	FALSE	TRUE	130	411	31.6302	Tmito	PHC|PTP|Q00325	ENSG00000075415
MRPS23	28S ribosomal protein S23, mitochondrial OS=Homo sapiens GN=MRPS23 PE=1 SV=2	3	3	17	27000000	41000000	10000000	10000000	15000000	25000000	14000000	20000000	12000000	23000000	16000000	17000000	22000000	17750000	0.806818	0.614807	0.211261	17000000	18500000	0.772727	0.840909	-0.371969	-0.249978	8	FALSE	TRUE	TRUE	21	411	5.10949	Tmito	HSPC329|MRP-S23|Q9Y3D9	ENSG00000181610
FH	Fumarate hydratase, mitochondrial OS=Homo sapiens GN=FH PE=1 SV=3	4	4	13		18000000						11000000		9400000	24000000	25000000	18000000	17350000	0.963889			1.94667e+07	11000000	1.08148	0.611111	0.113009	-0.710493	4	TRUE	TRUE	TRUE	24	411	5.83942	Tmito	HLRCC|LRCC|MCL|MCUL1|P07954	ENSG00000091483
PMPCA	Mitochondrial-processing peptidase subunit alpha OS=Homo sapiens GN=PMPCA PE=1 SV=2	4	4	16	60000000	20000000					53000000	13000000	32000000	9100000	19000000	12000000	40000000	2.30167e+07	0.575417	0.546507	0.262404	18025000	33000000	0.450625	0.825	-1.15	-0.277534	6	FALSE	TRUE	TRUE	19	411	4.62287	Tmito	Alpha-MPP|INPP5E|P-55|Q10713	ENSG00000165688
ATP5B	ATP synthase subunit beta, mitochondrial OS=Homo sapiens GN=ATP5B PE=1 SV=3	25	25	345	260000000	200000000	61000000	79000000	150000000	110000000	190000000	100000000	160000000	200000000	160000000	110000000	150000000	147500000	0.983333	0.962672	0.0165217	157500000	137500000	1.05	0.916667	0.0703893	-0.125531	8	FALSE	TRUE	TRUE	211	411	51.3382	Tmito	ATPMB|ATPSB|HEL-S-271|P06576	ENSG00000110955
SUCLA2	Succinyl-CoA ligase [ADP-forming] subunit beta, mitochondrial OS=Homo sapiens GN=SUCLA2 PE=1 SV=3	6	6	16	20000000	22000000					12000000	13000000	8400000	11000000	34000000	28000000	21000000	1.77333e+07	0.844444	0.490912	0.308997	20350000	12500000	0.969048	0.595238	-0.0453605	-0.748461	6	FALSE	TRUE	TRUE	10	411	2.43309	Tmito	A-BETA|MTDPS5|SCS-betaA|Q9P2R7	ENSG00000136143
COQ3	Hexaprenyldihydroxybenzoate methyltransferase, mitochondrial OS=Homo sapiens GN=COQ3 PE=1 SV=3	1	1	1										12000000			0	12000000				12000000		100	0	6.64386		1	TRUE	FALSE	FALSE	0	411	0	Tmito	DHHBMT|DHHBMTASE|UG0215E05|bA9819.1|Q9NZJ6	ENSG00000132423
IARS2	Isoleucine--tRNA ligase, mitochondrial OS=Homo sapiens GN=IARS2 PE=1 SV=2	7	7	20	24000000	29000000	5000000		3800000	9000000		9000000		10000000	27000000	21000000	1.93333e+07	13300000	0.687931	0.512274	0.290498	1.93333e+07	7.26667e+06	1	0.375862	0	-1.41172	6	FALSE	TRUE	TRUE	18	411	4.37956	Tmito	ILERS|Q9NSE4	ENSG00000067704
MRPS15	28S ribosomal protein S15, mitochondrial OS=Homo sapiens GN=MRPS15 PE=1 SV=1	1	1	1				6000000									6000000	0	0					0	0			0	TRUE	FALSE	FALSE	15	411	3.64964	Tmito	MPR-S15|RPMS15|S15mt|P82914	ENSG00000116898
IDH3A	Isocitrate dehydrogenase [NAD] subunit alpha, mitochondrial OS=Homo sapiens GN=IDH3A PE=1 SV=1	6	6	35	49000000	43000000	9800000	12000000	34000000	23000000	32000000	24000000	19000000	32000000	51000000	48000000	28450000	32875000	1.15554	0.708071	0.149923	37500000	28250000	1.3181	0.99297	0.398462	-0.0101778	8	FALSE	TRUE	TRUE	32	411	7.78589	Tmito	P50213	ENSG00000166411
MRPL34	Ribosomal protein L34 OS=Homo sapiens GN=MRPL34 PE=2 SV=1	1	1	1	17000000												17000000	0	0					0	0			0	TRUE	FALSE	FALSE	3	411	0.729927	Tmito	L34mt|Q9BQ48	ENSG00000130312
UQCRH	Cytochrome b-c1 complex subunit 6, mitochondrial OS=Homo sapiens GN=UQCRH PE=1 SV=2	2	2	6	94000000		18000000		45000000		4600000		39000000		41000000		56000000	32400000	0.578571	0.645335	0.190215	40000000	24800000	0.714286	0.442857	-0.485427	-1.17509	4	FALSE	FALSE	TRUE	1	411	0.243309	Tmito	QCR6|UQCR8|P07919	ENSG00000173660
ATP5O	ATP synthase subunit O, mitochondrial OS=Homo sapiens GN=ATP5O PE=1 SV=1	7	7	39	38000000	36000000	19000000	18000000	26000000	27000000	26000000	32000000	42000000	59000000	27000000	23000000	27750000	32750000	1.18018	0.490303	0.309535	37750000	27750000	1.36036	1	0.443989	0	8	FALSE	TRUE	TRUE	51	411	12.4088	Tmito	ATPO|OSCP|P48047	ENSG00000241837
ECHS1	Enoyl-CoA hydratase, mitochondrial OS=Homo sapiens GN=ECHS1 PE=1 SV=4	9	9	84	82000000	92000000	33000000	26000000	27000000	54000000	33000000	63000000	40000000	58000000	130000000	110000000	58250000	64375000	1.10515	0.78193	0.106832	84500000	44250000	1.45064	0.759657	0.536693	-0.396581	8	FALSE	TRUE	TRUE	40	411	9.73236	Tmito	SCEH|P30084	ENSG00000127884
HADHA	Trifunctional enzyme subunit alpha, mitochondrial OS=Homo sapiens GN=HADHA PE=1 SV=2	21	21	174	87000000	64000000	23000000	42000000	42000000	35000000	50000000	35000000	34000000	50000000	70000000	45000000	54000000	45125000	0.835648	0.57626	0.239382	49750000	40500000	0.921296	0.75	-0.118263	-0.415037	8	FALSE	TRUE	TRUE	72	411	17.5182	Tmito	ECHA|GBP|HADH|LCEH|LCHAD|MTPA|TP-ALPHA|P40939	ENSG00000084754
ETFA	Electron transfer flavoprotein subunit alpha, mitochondrial OS=Homo sapiens GN=ETFA PE=1 SV=1	9	9	83	60000000	39000000	16000000	16000000	39000000	23000000	37000000	26000000	48000000	35000000	120000000	49000000	32750000	47125000	1.43893	0.369865	0.431957	63000000	31250000	1.92366	0.954198	0.943857	-0.0676387	8	FALSE	TRUE	TRUE	47	411	11.4355	Tmito	EMA|GA2|MADD|P13804	ENSG00000140374
NDUFS7	NADH dehydrogenase [ubiquinone] iron-sulfur protein 7, mitochondrial OS=Homo sapiens GN=NDUFS7 PE=2 SV=1	1	1	2								7300000		9800000			0	8550000				9800000	7300000	100	100	6.64386	6.64386	2	TRUE	FALSE	FALSE	17	411	4.13625	Tmito	CI-20|CI-20KD|MY017|PSST|O75251	ENSG00000115286
CPT2	Carnitine O-palmitoyltransferase 2, mitochondrial OS=Homo sapiens GN=CPT2 PE=1 SV=2	6	6	23	14000000	17000000	8800000	17000000	7900000		13000000	15000000	12000000	20000000	16000000	20000000	14200000	1.48429e+07	1.04527	0.807511	0.0928517	17000000	1.19667e+07	1.19718	0.842723	0.259644	-0.24687	7	FALSE	TRUE	TRUE	7	411	1.70316	Tmito	CPT1|CPTASE|IIAE4|P23786	ENSG00000157184
IDH3B	Isocitrate dehydrogenase [NAD] subunit beta, mitochondrial OS=Homo sapiens GN=IDH3B PE=1 SV=2	4	4	22	24000000	25000000	15000000	15000000		21000000	27000000		28000000	19000000	31000000	27000000	19750000	25500000	1.29114	0.136864	0.863709	26250000	24000000	1.32911	1.21519	0.410465	0.281182	6	FALSE	TRUE	TRUE	17	411	4.13625	Tmito	H-IDHB|RP46|O43837	ENSG00000101365
LARS2	Probable leucine--tRNA ligase, mitochondrial OS=Homo sapiens GN=LARS2 PE=1 SV=2	3	3	4											13000000	14000000	0	13500000				13500000		100	0	6.64386		2	TRUE	TRUE	FALSE	5	411	1.21655	Tmito	LEURS|PRLTS4|Q15031	ENSG00000011376
LETM1	LETM1 and EF-hand domain-containing protein 1, mitochondrial OS=Homo sapiens GN=LETM1 PE=1 SV=1	4	4	22	28000000	17000000	2900000	2900000	15000000	11000000	21000000	13000000	15000000	9400000	33000000	16000000	12700000	16675000	1.31299	0.580118	0.236483	18350000	15000000	1.44488	1.1811	0.530952	0.240134	8	FALSE	TRUE	TRUE	18	411	4.37956	Tmito	O95202	ENSG00000168924
ATP5I	ATP synthase subunit e, mitochondrial OS=Homo sapiens GN=ATP5I PE=1 SV=2	1	1	3		24000000								20000000		20000000	24000000	20000000	0.833333			20000000		0.833333	0	-0.263034		2	TRUE	FALSE	FALSE	6	411	1.45985	Tmito	ATP5K|P56385	ENSG00000169020
OPA1	Dynamin-like 120 kDa protein, mitochondrial OS=Homo sapiens GN=OPA1 PE=3 SV=1	2	2	7	5400000	5500000					6400000		6200000	5900000	8800000	10000000	5450000	7460000	1.36881	0.0698463	1.15586	7725000	6400000	1.41743	1.17431	0.503279	0.231816	5	FALSE	FALSE	TRUE	13	411	3.16302	Tmito	MGM1|NPG|NTG|largeG|O60313	ENSG00000198836
SUCLG1	Succinyl-CoA ligase [ADP/GDP-forming] subunit alpha, mitochondrial OS=Homo sapiens GN=SUCLG1 PE=1 SV=4	4	4	18	34000000	35000000			11000000		19000000	25000000	14000000	21000000	49000000	41000000	34500000	2.57143e+07	0.745342	0.151648	0.819164	31250000	1.83333e+07	0.905797	0.531401	-0.14274	-0.912127	7	FALSE	TRUE	TRUE	20	411	4.86618	Tpossible_mito	GALPHA|MTDPS9|SUCLA1|P53597	ENSG00000163541
COQ6	Ubiquinone biosynthesis monooxygenase COQ6 OS=Homo sapiens GN=COQ6 PE=1 SV=2	1	1	1							5300000						0	5300000					5300000	0	100		6.64386	1	TRUE	FALSE	FALSE	0	411	0	Tmito	CGI10|COQ10D6|Q9Y2Z9	ENSG00000119723
MRPL43	Isoform 6 of 39S ribosomal protein L43, mitochondrial OS=Homo sapiens GN=MRPL43	2	2	6		20000000				10000000		8900000	8800000	14000000		11000000	20000000	10540000	0.527			1.12667e+07	9450000	0.563333	0.4725	-0.827939	-1.08161	5	TRUE	FALSE	TRUE	8	411	1.94647	Tmito	bMRP36a|Q8N983	ENSG00000055950
ATP5J	Isoform 2 of ATP synthase-coupling factor 6, mitochondrial OS=Homo sapiens GN=ATP5J	3	3	23	43000000	42000000	19000000	22000000	23000000	33000000	33000000	50000000	49000000	63000000	28000000	37000000	31500000	39500000	1.25397	0.350407	0.455428	44250000	34750000	1.40476	1.10317	0.490326	0.141661	8	FALSE	TRUE	TRUE	10	411	2.43309	Tmito	ATP5|ATP5A|ATPM|CF6|F6|P18859	ENSG00000154723
LONP1	Lon protease homolog, mitochondrial OS=Homo sapiens GN=LONP1 PE=2 SV=1	12	12	58	48000000	30000000	5800000	10000000	20000000	16000000	49000000	21000000	21000000	29000000	29000000	25000000	23450000	26250000	1.1194	0.801345	0.0961805	26000000	26500000	1.10874	1.13006	0.148924	0.176404	8	FALSE	TRUE	TRUE	73	411	17.7616	Tmito	LON|LONP|LonHS|PIM1|PRSS15|hLON|P36776	ENSG00000196365
DLD	Dihydrolipoyl dehydrogenase, mitochondrial OS=Homo sapiens GN=DLD PE=1 SV=2	10	10	84	66000000	65000000	12000000	18000000	31000000	26000000	50000000	34000000	28000000	40000000	81000000	67000000	40250000	44625000	1.1087	0.799732	0.0970553	54000000	35250000	1.34161	0.875776	0.423971	-0.191366	8	FALSE	TRUE	TRUE	84	411	20.438	Tmito	DLDD|DLDH|E3|GCSL|LAD|PHE3|P09622	ENSG00000091140
AIFM1	Apoptosis-inducing factor 1, mitochondrial OS=Homo sapiens GN=AIFM1 PE=1 SV=1	8	8	63	46000000	36000000	8200000	8300000	11000000	11000000	26000000	20000000	16000000	20000000	41000000	33000000	24625000	22250000	0.903553	0.830282	0.0807744	27500000	17000000	1.11675	0.690355	0.159308	-0.534589	8	FALSE	TRUE	TRUE	101	411	24.5742	Tmito	AIF|CMT2D|CMTX4|COWCK|COXPD6|NADMR|NAMSD|PDCD8|O95831	ENSG00000156709
MRPL10	Isoform 2 of 39S ribosomal protein L10, mitochondrial OS=Homo sapiens GN=MRPL10	3	3	7	15000000		2000000	2700000				9900000			16000000	20000000	6.56667e+06	15300000	2.32995	0.17327	0.761277	18000000	9900000	2.74112	1.50761	1.45476	0.592267	3	FALSE	TRUE	TRUE	8	411	1.94647	Tmito	L10MT|MRP-L10|MRP-L8|MRPL8|RPML8|Q7Z7H8	ENSG00000159111
ACADM	Acyl-Coenzyme A dehydrogenase, C-4 to C-12 straight chain, isoform CRA_a OS=Homo sapiens GN=ACADM PE=3 SV=1	7	7	52	28000000	36000000	4100000	16000000	13000000	12000000	15000000	18000000	16000000	23000000	44000000	50000000	21025000	23875000	1.13555	0.753981	0.122639	33250000	14500000	1.58145	0.689655	0.661249	-0.536053	8	FALSE	TRUE	TRUE	22	411	5.3528	Tmito	ACAD1|MCAD|MCADH|P11310	ENSG00000117054
TIMM9	Mitochondrial import inner membrane translocase subunit Tim9 OS=Homo sapiens GN=TIMM9 PE=1 SV=1	2	2	4	15000000						9100000	11000000	7100000				15000000	9.06667e+06	0.604444			7100000	10050000	0.473333	0.67	-1.07907	-0.577767	3	TRUE	FALSE	FALSE	0	411	0	Tmito	TIM9|TIM9A|Q9Y5J7	ENSG00000100575
SLC25A4	ADP/ATP translocase 1 OS=Homo sapiens GN=SLC25A4 PE=1 SV=4	1	5	30		18000000											18000000	0	0					0	0			0	TRUE	TRUE	TRUE	195	411	47.4453	Tmito	1|AAC1|ANT|ANT 1|ANT1|MTDPS12|PEO2|PEO3|T1|P12235	ENSG00000151729
NDUFS2	NADH dehydrogenase [ubiquinone] iron-sulfur protein 2, mitochondrial OS=Homo sapiens GN=NDUFS2 PE=1 SV=2	2	2	3		8500000			13000000					8400000			8500000	10700000	1.25882			8400000	13000000	0.988235	1.52941	-0.0170735	0.612977	2	TRUE	FALSE	FALSE	14	411	3.40633	Tmito	CI-49|O75306	ENSG00000158864
ACO2	Aconitate hydratase, mitochondrial OS=Homo sapiens GN=ACO2 PE=2 SV=1	17	17	84	66000000	63000000		23000000	17000000	20000000	27000000	40000000	33000000	36000000	74000000	83000000	5.06667e+07	41250000	0.814145	0.597311	0.223799	56500000	26000000	1.11513	0.513158	0.157214	-0.962525	8	FALSE	TRUE	TRUE	27	411	6.56934	Tmito	ACONM|ICRD|Q99798	ENSG00000100412
FECH	Isoform 2 of Ferrochelatase, mitochondrial OS=Homo sapiens GN=FECH	15	15	139	75000000	89000000	44000000	58000000	74000000	83000000	85000000	76000000	84000000	110000000	53000000	60000000	66500000	78125000	1.17481	0.357776	0.446389	76750000	79500000	1.15414	1.19549	0.206812	0.257601	8	FALSE	TRUE	TRUE	5	411	1.21655	Tmito	EPP|FCE|P22830	ENSG00000066926
PHB	Prohibitin OS=Homo sapiens GN=PHB PE=1 SV=1	13	13	117	67000000	68000000	28000000	33000000	41000000	45000000	50000000	46000000	41000000	43000000	48000000	44000000	49000000	44750000	0.913265	0.719484	0.142979	44000000	45500000	0.897959	0.928571	-0.155278	-0.106915	8	FALSE	TRUE	TRUE	85	411	20.6813	Tmito	HEL-215|HEL-S-54e|PHB1|P35232	ENSG00000167085
HIBCH	3-hydroxyisobutyryl-CoA hydrolase, mitochondrial OS=Homo sapiens GN=HIBCH PE=1 SV=2	5	5	9	14000000						7800000				13000000	19000000	14000000	1.32667e+07	0.947619			16000000	7800000	1.14286	0.557143	0.192645	-0.843881	3	TRUE	TRUE	TRUE	7	411	1.70316	Tmito	HIBYLCOAH|Q6NVY1	ENSG00000198130
HSPA9	Stress-70 protein, mitochondrial OS=Homo sapiens GN=HSPA9 PE=1 SV=2	29	29	929	1100000000	960000000	430000000	430000000	480000000	460000000	620000000	580000000	550000000	630000000	880000000	740000000	730000000	617500000	0.84589	0.575123	0.240239	700000000	535000000	0.958904	0.732877	-0.0605415	-0.448358	8	FALSE	TRUE	TRUE	307	411	74.6959	Tmito	CSA|GRP-75|GRP75|HEL-S-124m|HSPA9B|MOT|MOT2|MTHSP75|PBP74|P38646	ENSG00000113013
PRDX3	Thioredoxin-dependent peroxide reductase, mitochondrial OS=Homo sapiens GN=PRDX3 PE=1 SV=3	8	8	189	570000000	570000000	140000000	170000000	180000000	240000000	350000000	330000000	260000000	340000000	510000000	490000000	362500000	337500000	0.931034	0.853931	0.0685774	400000000	275000000	1.10345	0.758621	0.142019	-0.398549	8	FALSE	TRUE	TRUE	137	411	33.3333	Tmito	AOP-1|AOP1|HBC189|MER5|PRO1748|SP-22|prx-III|P30048	ENSG00000165672
TIMM13	Mitochondrial import inner membrane translocase subunit Tim13 OS=Homo sapiens GN=TIMM13 PE=1 SV=1	5	5	62	89000000	120000000	36000000	40000000	38000000	40000000	54000000	64000000	43000000	63000000	100000000	61000000	71250000	57875000	0.812281	0.568448	0.245309	66750000	49000000	0.936842	0.687719	-0.0941222	-0.540108	8	FALSE	TRUE	TRUE	65	411	15.8151	Tmito	TIM13|TIM13B|TIMM13A|TIMM13B|ppv1|Q9Y5L4	ENSG00000099800
LYRM4	LYR motif-containing protein 4 OS=Homo sapiens GN=LYRM4 PE=1 SV=1	2	2	11	22000000	22000000	10000000				16000000	22000000	16000000	13000000	22000000	19000000	18000000	18000000	1	1	0	17500000	19000000	0.972222	1.05556	-0.040642	0.0780025	6	FALSE	FALSE	TRUE	2	411	0.486618	Tmito	C6orf149|CGI-203|COXPD19|ISD11|RP11-428J1.4|Q9HD34	ENSG00000214113
IDH3G	Isocitrate dehydrogenase [NAD] subunit gamma, mitochondrial OS=Homo sapiens GN=IDH3G PE=1 SV=1	2	2	9	46000000						43000000		35000000		34000000	20000000	46000000	33000000	0.717391			2.96667e+07	43000000	0.644928	0.934783	-0.632791	-0.0972972	4	TRUE	FALSE	TRUE	9	411	2.18978	Tmito	H-IDHG|P51553	ENSG00000067829
C21orf33	ES1 protein homolog, mitochondrial OS=Homo sapiens GN=C21orf33 PE=1 SV=3	2	2	11	52000000	49000000						15000000		18000000	30000000	48000000	50500000	27750000	0.549505	0.0534206	1.27229	32000000	15000000	0.633663	0.29703	-0.658211	-1.75132	4	FALSE	FALSE	TRUE	17	411	4.13625	Tmito	ES1|GT335|HES1|KNPH|KNPI|P30042	ENSG00000160221
TXN2	Thioredoxin, mitochondrial OS=Homo sapiens GN=TXN2 PE=1 SV=2	2	2	14	50000000	58000000	8400000			20000000	27000000	35000000	20000000	27000000	76000000	110000000	38800000	45000000	1.15979	0.770962	0.112967	58250000	2.73333e+07	1.50129	0.704467	0.586201	-0.505395	7	FALSE	FALSE	TRUE	0	411	0	Tmito	MT-TRX|MTRX|TRX2|Q99757	ENSG00000100348
NDUFA6	NADH dehydrogenase [ubiquinone] 1 alpha subcomplex subunit 6 OS=Homo sapiens GN=NDUFA6 PE=1 SV=3	2	2	10					19000000	27000000	19000000	21000000	20000000	29000000	27000000	24000000		23250000		7.86373e-07	6.10437	25000000	21500000	100	100	6.64386	6.64386	8	TRUE	FALSE	TRUE	3	411	0.729927	Tmito	B14|CI-B14|LYRM6|NADHB14|P56556	ENSG00000184983
MRPL1	39S ribosomal protein L1, mitochondrial OS=Homo sapiens GN=MRPL1 PE=1 SV=2	1	1	1								8700000					0	8700000					8700000	0	100		6.64386	1	TRUE	FALSE	FALSE	13	411	3.16302	Tmito	BM022|L1MT|MRP-L1|Q9BYD6	ENSG00000169288
TIMM44	Mitochondrial import inner membrane translocase subunit TIM44 OS=Homo sapiens GN=TIMM44 PE=1 SV=2	10	10	70	57000000	45000000	19000000	24000000	37000000	17000000	39000000	24000000	17000000	30000000	65000000	35000000	36250000	33000000	0.910345	0.767926	0.114681	36750000	29250000	1.01379	0.806897	0.0197633	-0.309544	8	FALSE	TRUE	TRUE	40	411	9.73236	Tmito	TIM44|O43615	ENSG00000104980
COX17	Cytochrome c oxidase copper chaperone OS=Homo sapiens GN=COX17 PE=4 SV=1	1	1	17	44000000	56000000			16000000	21000000	28000000	33000000	22000000	25000000	66000000	72000000	50000000	35375000	0.7075	0.191194	0.718526	46250000	24500000	0.925	0.49	-0.112475	-1.02915	8	FALSE	FALSE	TRUE	27	411	6.56934	Tmito	Q14061	ENSG00000138495
SOD2	Superoxide dismutase [Mn], mitochondrial OS=Homo sapiens GN=SOD2 PE=1 SV=2	5	5	40	32000000	39000000	5300000	6900000	9500000	13000000	16000000	20000000	15000000	20000000	50000000	51000000	20800000	24312500	1.16887	0.747507	0.126385	34000000	14625000	1.63462	0.703125	0.708951	-0.508147	8	FALSE	TRUE	TRUE	2	411	0.486618	Tmito	IPOB|MNSOD|MVCD6|P04179	ENSG00000112096
COX6B1	Cytochrome c oxidase subunit 6B1 OS=Homo sapiens GN=COX6B1 PE=1 SV=2	3	3	24	20000000	28000000	19000000	22000000		13000000	20000000	23000000	13000000	17000000	18000000	20000000	22250000	1.77143e+07	0.796148	0.115197	0.938558	17000000	1.86667e+07	0.764045	0.838951	-0.388271	-0.253341	7	FALSE	TRUE	TRUE	9	411	2.18978	Tmito	COX6B|COXG|COXVIb1|P14854	ENSG00000126267
VDAC1	Voltage-dependent anion-selective channel protein 1 OS=Homo sapiens GN=VDAC1 PE=1 SV=2	7	7	50	42000000	47000000	7400000		28000000	35000000	37000000	30000000	21000000	29000000	34000000	31000000	3.21333e+07	30625000	0.95306	0.915108	0.0385279	28750000	32500000	0.89471	1.01141	-0.160509	0.0163691	8	FALSE	TRUE	TRUE	58	411	14.1119	Tmito	PORIN|VDAC-1|P21796	ENSG00000073905
HADH	Isoform 2 of Hydroxyacyl-coenzyme A dehydrogenase, mitochondrial OS=Homo sapiens GN=HADH	4	4	11	28000000	36000000			10000000		13000000	24000000	42000000		58000000	52000000	32000000	3.31667e+07	1.03646	0.903578	0.0440346	5.06667e+07	1.56667e+07	1.58333	0.489583	0.662965	-1.03037	6	FALSE	TRUE	TRUE	27	411	6.56934	Tmito	HAD|HADH1|HADHSC|HCDH|HHF4|MSCHAD|SCHAD|Q16836	ENSG00000138796
ACAT1	Acetyl-CoA acetyltransferase, mitochondrial OS=Homo sapiens GN=ACAT1 PE=1 SV=1	9	9	75	76000000	67000000	20000000	16000000	22000000	25000000	33000000	27000000	33000000	41000000	95000000	88000000	44750000	45500000	1.01676	0.969298	0.0135427	64250000	26750000	1.43575	0.597765	0.521809	-0.742349	8	FALSE	TRUE	TRUE	63	411	15.3285	Tmito	ACAT|MAT|T2|THIL|P24752	ENSG00000075239
MALSU1	Mitochondrial assembly of ribosomal large subunit protein 1 OS=Homo sapiens GN=MALSU1 PE=1 SV=1	1	1	2	16000000	15000000											15500000	0	0					0	0			0	TRUE	FALSE	FALSE	1	411	0.243309	Tmito	C7orf30|mtRsfA|Q96EH3	ENSG00000156928
CLPX	ATP-dependent Clp protease ATP-binding subunit clpX-like, mitochondrial OS=Homo sapiens GN=CLPX PE=1 SV=2	7	7	26	20000000	19000000		11000000	15000000	18000000	22000000	19000000	19000000	26000000		16000000	1.66667e+07	1.92857e+07	1.15714	0.469536	0.328331	2.03333e+07	18500000	1.22	1.11	0.286881	0.15056	7	FALSE	TRUE	TRUE	23	411	5.59611	Tmito	O76031	ENSG00000166855
C1QBP	Complement component 1 Q subcomponent-binding protein, mitochondrial OS=Homo sapiens GN=C1QBP PE=1 SV=1	8	8	479	1800000000	1600000000	810000000	1200000000	1000000000	1200000000	1200000000	1200000000	730000000	1100000000	1600000000	1200000000	1352500000	1153750000	0.85305	0.447482	0.349225	1157500000	1150000000	0.855823	0.850277	-0.224616	-0.233995	8	FALSE	TRUE	TRUE	223	411	54.2579	Tmito	GC1QBP|HABP1|SF2p32|gC1Q-R|gC1qR|p32|Q07021	ENSG00000108561
PITRM1	Isoform 2 of Presequence protease, mitochondrial OS=Homo sapiens GN=PITRM1	6	6	18	22000000	28000000						15000000	16000000	16000000	29000000	26000000	25000000	20400000	0.816	0.350763	0.454986	21750000	15000000	0.87	0.6	-0.200913	-0.736966	5	FALSE	TRUE	TRUE	11	411	2.6764	Tmito	MP1|PreP|Q5JRX3	ENSG00000107959
MECR	Trans-2-enoyl-CoA reductase, mitochondrial OS=Homo sapiens GN=MECR PE=1 SV=2	2	2	12	21000000	26000000		2800000	13000000	20000000	15000000	19000000	22000000	29000000	15000000	15000000	16600000	18500000	1.11446	0.816007	0.0883062	20250000	16750000	1.21988	1.00904	0.286739	0.0129779	8	FALSE	FALSE	TRUE	1	411	0.243309	Tmito	CGI-63|FASN2B|NRBF1|Q9BV79	ENSG00000116353
MRPL44	39S ribosomal protein L44, mitochondrial OS=Homo sapiens GN=MRPL44 PE=1 SV=1	2	2	8	37000000	15000000			18000000		19000000	11000000		11000000			26000000	14750000	0.567308	0.488997	0.310693	11000000	16000000	0.423077	0.615385	-1.24101	-0.70044	4	FALSE	FALSE	TRUE	10	411	2.43309	Tmito	COXPD16|L44MT|MRP-L44|Q9H9J2	ENSG00000135900
HSDL2	Hydroxysteroid dehydrogenase-like protein 2 OS=Homo sapiens GN=HSDL2 PE=1 SV=1	11	11	48	15000000	15000000	7200000	6700000	29000000	20000000	17000000	14000000	13000000	19000000	26000000	20000000	10975000	19750000	1.79954	0.0225987	1.64592	19500000	20000000	1.77677	1.82232	0.829253	0.865779	8	TRUE	TRUE	TRUE	15	411	3.64964	Tmito	C9orf99|SDR13C1|Q6YN16	ENSG00000119471
MRPS14	28S ribosomal protein S14, mitochondrial OS=Homo sapiens GN=MRPS14 PE=1 SV=1	2	2	3	17000000	20000000											18500000	0	0					0	0			0	TRUE	FALSE	FALSE	16	411	3.89294	Tmito	DJ262D12.2|HSMRPS14|MRP-S14|S14mt|O60783	ENSG00000120333
ATPAF2	ATP synthase mitochondrial F1 complex assembly factor 2 OS=Homo sapiens GN=ATPAF2 PE=1 SV=1	10	10	51					39000000	42000000	29000000	38000000	29000000	41000000	19000000	22000000	0	32375000	100	1.74547e-05	4.75809	27750000	37000000	100	100	6.64386	6.64386	8	TRUE	TRUE	TRUE	3	411	0.729927	Tmito	ATP12|ATP12p|MC5DN1|Q8N5M1	ENSG00000171953
COA6	Isoform 2 of Cytochrome c oxidase assembly factor 6 homolog OS=Homo sapiens GN=COA6	3	3	44	66000000	78000000	43000000	46000000	53000000	61000000	39000000	61000000	46000000	67000000	51000000	62000000	58250000	55000000	0.944206	0.73554	0.133394	56500000	53500000	0.969957	0.918455	-0.0440072	-0.122719	8	FALSE	TRUE	TRUE	11	411	2.6764	Tmito	C1orf31|Q5JTJ3	ENSG00000168275
ISCU	Iron-sulfur cluster assembly enzyme ISCU, mitochondrial OS=Homo sapiens GN=ISCU PE=1 SV=2	3	3	6			7000000				15000000	18000000			17000000	17000000	7000000	16750000	2.39286			17000000	16500000	2.42857	2.35714	1.28011	1.23704	4	TRUE	TRUE	TRUE	0	411	0	Tmito	2310020H20Rik|HML|ISU2|NIFU|NIFUN|hnifU|Q9H1K1	ENSG00000136003
ATP5C1	ATP synthase subunit gamma, mitochondrial OS=Homo sapiens GN=ATP5C1 PE=1 SV=1	7	7	24	49000000	39000000	14000000	8000000	41000000	46000000	39000000	37000000	37000000	37000000	36000000	35000000	27500000	38500000	1.4	0.34519	0.461942	36250000	40750000	1.31818	1.48182	0.398549	0.567368	8	FALSE	TRUE	TRUE	68	411	16.545	Tmito	ATP5C|ATP5CL1|P36542	ENSG00000165629
SLC25A11	Mitochondrial 2-oxoglutarate/malate carrier protein OS=Homo sapiens GN=SLC25A11 PE=1 SV=3	1	1	18	34000000	38000000	7200000		14000000	17000000	14000000	18000000	12000000	15000000	19000000	21000000	26400000	16250000	0.61553	0.404067	0.393546	16750000	15750000	0.63447	0.596591	-0.656377	-0.745186	8	FALSE	FALSE	TRUE	55	411	13.382	Tmito	OGC|SLC20A4|Q02978	ENSG00000108528
TIMM8B	Mitochondrial import inner membrane translocase subunit Tim8 B OS=Homo sapiens GN=TIMM8B PE=1 SV=1	2	2	7	25000000	27000000						13000000			21000000	19000000	26000000	1.76667e+07	0.679487	0.060178	1.22056	20000000	13000000	0.769231	0.5	-0.378512	-1	3	FALSE	FALSE	TRUE	8	411	1.94647	Tmito	DDP2|TIM8B|Q9Y5J9	ENSG00000150779
MCAT	Malonyl-CoA-acyl carrier protein transacylase, mitochondrial OS=Homo sapiens GN=MCAT PE=1 SV=2	1	1	5		18000000		9000000	6700000			9300000		13000000			13500000	9.66667e+06	0.716049	0.545546	0.263169	13000000	8000000	0.962963	0.592593	-0.0544478	-0.754888	3	FALSE	FALSE	TRUE	0	411	0	Tmito	FASN2C|MCT|MT|NET62|fabD|Q8IVS2	ENSG00000100294
IBA57	Putative transferase CAF17, mitochondrial OS=Homo sapiens GN=IBA57 PE=1 SV=1	1	1	5								8400000	10000000	11000000	9300000	13000000		10340000		0.000196417	3.70682	10825000	8400000	100	100	6.64386	6.64386	5	TRUE	FALSE	TRUE	7	411	1.70316	Tmito	C1orf69|MMDS3|Q5T440	ENSG00000181873
PHB2	Prohibitin-2 OS=Homo sapiens GN=PHB2 PE=2 SV=1	14	14	105	110000000	92000000	29000000	36000000	56000000	47000000	75000000	65000000	43000000	61000000	60000000	43000000	66750000	56250000	0.842697	0.64232	0.192249	51750000	60750000	0.775281	0.910112	-0.367209	-0.135883	8	FALSE	TRUE	TRUE	95	411	23.1144	Tmito	BAP|BCAP37|Bap37|PNAS-141|REA|p22|Q99623	ENSG00000215021
DAP3	28S ribosomal protein S29, mitochondrial OS=Homo sapiens GN=DAP3 PE=1 SV=1	4	4	11	33000000	18000000					19000000	9700000	15000000	15000000	12000000	10000000	25500000	13450000	0.527451	0.346788	0.459936	13000000	14350000	0.509804	0.562745	-0.971986	-0.829447	6	FALSE	TRUE	TRUE	41	411	9.97567	Tmito	DAP-3|MRP-S29|MRPS29|bMRP-10|P51398	ENSG00000132676
MRPS17	28S ribosomal protein S17, mitochondrial OS=Homo sapiens GN=MRPS17 PE=3 SV=1	2	2	14	49000000	72000000	14000000		20000000	23000000	22000000	21000000	19000000	27000000	23000000	23000000	45000000	22250000	0.494444	0.309613	0.509181	23000000	21500000	0.511111	0.477778	-0.968291	-1.06559	8	FALSE	FALSE	TRUE	11	411	2.6764	Tmito	HSPC011|MRP-S17|RPMS17|S17mt|Q9Y2R5	ENSG00000239789
NFS1	Cysteine desulfurase, mitochondrial OS=Homo sapiens GN=NFS1 PE=1 SV=3	3	3	26	15000000	17000000			12000000	17000000	14000000	15000000	14000000	17000000	12000000	13000000	16000000	14250000	0.890625	0.280036	0.552786	14000000	14500000	0.875	0.90625	-0.192645	-0.142019	8	FALSE	TRUE	TRUE	10	411	2.43309	Tmito	IscS|NIFS|Q9Y697	ENSG00000244005
TACO1	Translational activator of cytochrome c oxidase 1 OS=Homo sapiens GN=TACO1 PE=1 SV=1	4	4	7	15000000	28000000					6900000				27000000	22000000	21500000	1.86333e+07	0.866667	0.771477	0.112677	24500000	6900000	1.13953	0.32093	0.188445	-1.63967	3	FALSE	TRUE	TRUE	9	411	2.18978	Tmito	CCDC44|Q9BSH4	ENSG00000136463
MRPL11	39S ribosomal protein L11, mitochondrial OS=Homo sapiens GN=MRPL11 PE=1 SV=1	7	7	26	17000000	19000000	5400000		9300000		9000000	6200000	9800000	11000000	13000000	9200000	13800000	9.64286e+06	0.698758	0.430972	0.365551	10750000	8.16667e+06	0.778986	0.591787	-0.360332	-0.756849	7	FALSE	TRUE	TRUE	11	411	2.6764	Tmito	L11MT|MRP-L11|Q9Y3B7	ENSG00000174547
COX4I1	Cytochrome c oxidase subunit 4 isoform 1, mitochondrial OS=Homo sapiens GN=COX4I1 PE=1 SV=1	3	3	25	36000000	46000000			20000000	23000000	24000000	24000000	13000000	20000000	28000000	31000000	41000000	22875000	0.557927	0.133449	0.874683	23000000	22750000	0.560976	0.554878	-0.83399	-0.849757	8	FALSE	TRUE	TRUE	18	411	4.37956	Tmito	COX4|COX4-1|COXIV|P13073	ENSG00000131143
NDUFS6	NADH dehydrogenase [ubiquinone] iron-sulfur protein 6, mitochondrial OS=Homo sapiens GN=NDUFS6 PE=2 SV=1	1	1	11	20000000	31000000		7900000	5300000	11000000	8000000	9100000		8200000	13000000	16000000	1.96333e+07	1.00857e+07	0.513704	0.286845	0.542353	12400000	8350000	0.631579	0.425297	-0.662965	-1.23346	7	FALSE	FALSE	TRUE	0	411	0	Tmito	CI-13kA|CI-13kD-A|CI13KDA|O75380	ENSG00000145494
COX5B	Cytochrome c oxidase subunit 5B, mitochondrial OS=Homo sapiens GN=COX5B PE=1 SV=2	3	3	8	18000000	26000000		9500000				12000000		16000000			1.78333e+07	14000000	0.785047	0.519291	0.284589	16000000	12000000	0.897196	0.672897	-0.156504	-0.571542	2	FALSE	TRUE	TRUE	10	411	2.43309	Tmito	COXVB|P10606	ENSG00000135940
NDUFA5	NADH dehydrogenase [ubiquinone] 1 alpha subcomplex subunit 5 OS=Homo sapiens GN=NDUFA5 PE=1 SV=3	3	3	8					22000000	19000000	8700000		15000000	22000000	10000000		0	1.61167e+07	100	0.00108586	2.96422	1.56667e+07	1.65667e+07	100	100	6.64386	6.64386	6	TRUE	TRUE	TRUE	13	411	3.16302	Tmito	B13|CI-13KD-B|CI-13kB|NUFM|UQOR13|Q16718	ENSG00000128609
SUCLG2	Isoform 2 of Succinyl-CoA ligase [GDP-forming] subunit beta, mitochondrial OS=Homo sapiens GN=SUCLG2	6	6	8		11000000						9300000			9800000	15000000	11000000	1.13667e+07	1.03333			12400000	9300000	1.12727	0.845455	0.172837	-0.242201	3	TRUE	TRUE	TRUE	10	411	2.43309	Tmito	GBETA|Q96I99	ENSG00000172340
FDX1	Adrenodoxin, mitochondrial OS=Homo sapiens GN=FDX1 PE=1 SV=1	1	1	1												23000000	0	23000000				23000000		100	0	6.64386		1	TRUE	FALSE	FALSE	1	411	0.243309	Tmito	ADX|FDX|LOH11CR1D|P10109	ENSG00000137714
MRPS28	28S ribosomal protein S28, mitochondrial OS=Homo sapiens GN=MRPS28 PE=1 SV=1	3	4	26	39000000	59000000	14000000	12000000		21000000	27000000	23000000	19000000	23000000	25000000	20000000	31000000	2.25714e+07	0.728111	0.506314	0.29558	21750000	2.36667e+07	0.701613	0.763441	-0.511253	-0.389412	7	FALSE	TRUE	TRUE	21	411	5.10949	Tmito	MRP-S28|MRP-S35|MRPS35|Q9Y2Q9	ENSG00000147586
VDAC2	Isoform 1 of Voltage-dependent anion-selective channel protein 2 OS=Homo sapiens GN=VDAC2	4	4	19	24000000	23000000		7400000	13000000	14000000	17000000	16000000	11000000	8700000	15000000	15000000	1.81333e+07	13712500	0.756204	0.498636	0.302216	12425000	15000000	0.685202	0.827206	-0.545398	-0.273682	8	FALSE	TRUE	TRUE	58	411	14.1119	Tmito	POR|P45880	ENSG00000165637
ECH1	Delta(3,5)-Delta(2,4)-dienoyl-CoA isomerase, mitochondrial OS=Homo sapiens GN=ECH1 PE=1 SV=2	7	7	34	24000000	28000000			8100000	11000000	19000000	17000000	14000000	20000000	23000000	24000000	26000000	17012500	0.654327	0.0406364	1.39108	20250000	13775000	0.778846	0.529808	-0.36059	-0.916459	8	TRUE	TRUE	TRUE	65	411	15.8151	Tmito	HPXEL|Q13011	ENSG00000104823
ERAL1	GTPase Era, mitochondrial OS=Homo sapiens GN=ERAL1 PE=1 SV=2	3	3	4	10000000	17000000				13000000							13500000	13000000	0.962963				13000000	0	0.962963		-0.0544478	1	TRUE	TRUE	FALSE	10	411	2.43309	Tmito	ERA|ERAL1A|H-ERA|HERA-A|HERA-B|O75616	ENSG00000132591
CMC1	COX assembly mitochondrial protein homolog OS=Homo sapiens GN=CMC1 PE=1 SV=1	1	1	12	14000000	19000000	11000000	14000000	10000000	13000000	13000000	19000000	13000000	16000000	14000000	19000000	14500000	14625000	1.00862	0.95224	0.0212535	15500000	13750000	1.06897	0.948276	0.0962153	-0.0766213	8	FALSE	FALSE	TRUE	7	411	1.70316	Tmito	C3orf68|Q7Z7K0	ENSG00000187118
MRPL28	39S ribosomal protein L28, mitochondrial OS=Homo sapiens GN=MRPL28 PE=1 SV=4	1	1	2	13000000								6400000				13000000	6400000	0.492308			6400000		0.492308	0	-1.02237		1	TRUE	FALSE	FALSE	12	411	2.91971	Tmito	MAAT1|p15|Q13084	ENSG00000086504
TSFM	Elongation factor Ts, mitochondrial OS=Homo sapiens GN=TSFM PE=1 SV=2	5	5	11	14000000	24000000					11000000	12000000			19000000	30000000	19000000	18000000	0.947368	0.891252	0.0499994	24500000	11500000	1.28947	0.605263	0.366782	-0.724366	4	FALSE	TRUE	TRUE	12	411	2.91971	Tmito	EFTS|EFTSMT|P43897	ENSG00000123297
FXN	Frataxin, mitochondrial OS=Homo sapiens GN=FXN PE=1 SV=2	1	1	1												9300000	0	9300000				9300000		100	0	6.64386		1	TRUE	FALSE	FALSE	0	411	0	Tmito	CyaY|FA|FARR|FRDA|X25|Q16595	ENSG00000165060
NFU1	NFU1 iron-sulfur cluster scaffold homolog, mitochondrial OS=Homo sapiens GN=NFU1 PE=1 SV=2	2	2	5		12000000								5200000	13000000	16000000	12000000	11400000	0.95			11400000		0.95	0	-0.0740006		3	TRUE	FALSE	TRUE	0	411	0	Tmito	HIRIP|HIRIP5|MMDS1|NIFUC|Nfu|NifU|Q9UMS0	ENSG00000169599
YARS2	Tyrosine--tRNA ligase, mitochondrial OS=Homo sapiens GN=YARS2 PE=1 SV=2	3	3	4	11000000									7500000	11000000	17000000	11000000	1.18333e+07	1.07576			1.18333e+07		1.07576	0	0.105353		3	TRUE	TRUE	FALSE	16	411	3.89294	Tmito	MLASA2|MT-TYRRS|TYRRS|Q9Y2Z4	ENSG00000139131
MRPL21	39S ribosomal protein L21, mitochondrial OS=Homo sapiens GN=MRPL21 PE=1 SV=2	1	1	3	34000000						24000000				28000000		34000000	26000000	0.764706			28000000	24000000	0.823529	0.705882	-0.280108	-0.5025	2	TRUE	FALSE	FALSE	6	411	1.45985	Tmito	L21mt|MRP-L21|Q7Z2W9	ENSG00000197345
ALDH4A1	Delta-1-pyrroline-5-carboxylate dehydrogenase, mitochondrial OS=Homo sapiens GN=ALDH4A1 PE=1 SV=3	1	1	1												13000000	0	13000000				13000000		100	0	6.64386		1	TRUE	FALSE	FALSE	3	411	0.729927	Tmito	ALDH4|P5CD|P5CDh|P30038	ENSG00000159423
NDUFB10	NADH dehydrogenase [ubiquinone] 1 beta subcomplex subunit 10 OS=Homo sapiens GN=NDUFB10 PE=1 SV=3	2	2	5	7800000	5800000					13000000				6600000	4700000	6800000	8100000	1.19118	0.6686	0.174834	5650000	13000000	0.830882	1.91176	-0.267284	0.934905	3	FALSE	FALSE	TRUE	10	411	2.43309	Tmito	PDSW|O96000	ENSG00000140990
ACADSB	Short/branched chain specific acyl-CoA dehydrogenase, mitochondrial OS=Homo sapiens GN=ACADSB PE=1 SV=1	1	1	1	22000000												22000000	0	0					0	0			0	TRUE	FALSE	FALSE	7	411	1.70316	Tmito	2-MEBCAD|ACAD7|SBCAD|P45954	ENSG00000196177
MRPS9	28S ribosomal protein S9, mitochondrial OS=Homo sapiens GN=MRPS9 PE=1 SV=2	2	2	4	27000000	18000000										12000000	22500000	12000000	0.533333			12000000		0.533333	0	-0.906891		1	TRUE	FALSE	FALSE	27	411	6.56934	Tmito	MRP-S9|RPMS9|S9mt|P82933	ENSG00000135972
ADCK3	Chaperone activity of bc1 complex-like, mitochondrial OS=Homo sapiens GN=ADCK3 PE=1 SV=1	6	6	13				9800000		10000000			18000000	24000000		8500000	9800000	15125000	1.54337			1.68333e+07	10000000	1.71769	1.02041	0.780467	0.0291463	4	TRUE	TRUE	TRUE	11	411	2.6764	Tmito	ARCA2|CABC1|COQ10D4|COQ8|SCAR9|Q8NI60	ENSG00000163050
ACADVL	Isoform 3 of Very long-chain specific acyl-CoA dehydrogenase, mitochondrial OS=Homo sapiens GN=ACADVL	8	8	19		12000000	5000000	6100000	10000000	14000000		14000000	12000000	12000000	4700000	12000000	7700000	1.12429e+07	1.46011	0.241009	0.617967	10175000	1.26667e+07	1.32143	1.64502	0.402098	0.718107	7	FALSE	TRUE	TRUE	29	411	7.05596	Tmito	ACAD6|LCACD|VLCAD|P49748	ENSG00000072778
MRPL15	39S ribosomal protein L15, mitochondrial OS=Homo sapiens GN=MRPL15 PE=1 SV=1	1	1	3	20000000							11000000	6900000				20000000	8950000	0.4475			6900000	11000000	0.345	0.55	-1.53533	-0.862496	2	TRUE	FALSE	FALSE	13	411	3.16302	Tmito	L15mt|MRP-L15|MRP-L7|RPML7|Q9P015	ENSG00000137547
HSPD1	60 kDa heat shock protein, mitochondrial OS=Homo sapiens GN=HSPD1 PE=1 SV=2	39	39	1342	2500000000	2000000000	830000000	900000000	1700000000	1400000000	2100000000	1600000000	2000000000	1700000000	2000000000	1800000000	1557500000	1787500000	1.14767	0.620332	0.207375	1875000000	1700000000	1.20385	1.09149	0.267658	0.126303	8	FALSE	TRUE	TRUE	231	411	56.2044	Tmito	CPN60|GROEL|HLD4|HSP-60|HSP60|HSP65|HuCHA60|SPG13|P10809	ENSG00000144381
AK3	GTP:AMP phosphotransferase AK3, mitochondrial OS=Homo sapiens GN=AK3 PE=1 SV=4	2	2	3	42000000	21000000											31500000	0	0					0	0			0	TRUE	FALSE	FALSE	4	411	0.973236	Tmito	AK3L1|AK6|AKL3L|AKL3L1|FIX|Q9UIJ7	ENSG00000147853
CYCS	Cytochrome c OS=Homo sapiens GN=CYCS PE=1 SV=2	5	5	50	110000000	110000000	29000000	35000000	57000000	60000000	53000000	39000000	29000000	54000000	160000000	130000000	71000000	72750000	1.02465	0.951928	0.0213959	93250000	52250000	1.31338	0.735915	0.393285	-0.442388	8	FALSE	TRUE	TRUE	23	411	5.59611	Tmito	CYC|HCS|THC4|P99999	ENSG00000172115
MIPEP	Mitochondrial intermediate peptidase OS=Homo sapiens GN=MIPEP PE=1 SV=2	1	1	2											2600000	3800000	0	3200000				3200000		100	0	6.64386		2	TRUE	FALSE	FALSE	1	411	0.243309	Tmito	HMIP|MIP|Q99797	ENSG00000027001
LYRM7	Complex III assembly factor LYRM7 OS=Homo sapiens GN=LYRM7 PE=1 SV=1	3	3	13		24000000				18000000	27000000	13000000	15000000	20000000	28000000	20000000	24000000	2.01429e+07	0.839286			20750000	1.93333e+07	0.864583	0.805556	-0.209923	-0.311944	7	TRUE	TRUE	TRUE	1	411	0.243309	Tmito	C5orf31|MZM1L|Q5U5X0	ENSG00000186687
MRPS7	28S ribosomal protein S7, mitochondrial OS=Homo sapiens GN=MRPS7 PE=2 SV=1	4	4	28	29000000	30000000	14000000		12000000	15000000	14000000	13000000	14000000	11000000	19000000	19000000	2.43333e+07	14625000	0.601027	0.197493	0.704449	15750000	13500000	0.64726	0.554795	-0.627582	-0.849975	8	FALSE	TRUE	TRUE	29	411	7.05596	Tmito	MRP-S|MRP-S7|RP-S7|RPMS7|S7mt|bMRP27a|Q9Y2R9	ENSG00000125445
MRPS12	28S ribosomal protein S12, mitochondrial OS=Homo sapiens GN=MRPS12 PE=1 SV=1	1	1	3	76000000				23000000						34000000		76000000	28500000	0.375			34000000	23000000	0.447368	0.302632	-1.16046	-1.72437	2	TRUE	FALSE	FALSE	8	411	1.94647	Tmito	MPR-S12|MT-RPS12|RPMS12|RPS12|RPSM12|O15235	ENSG00000128626
CLPB	Caseinolytic peptidase B protein homolog OS=Homo sapiens GN=CLPB PE=1 SV=1	4	4	21	31000000	30000000	10000000	14000000				17000000	15000000	20000000	18000000	21000000	21250000	18200000	0.856471	0.615923	0.210473	18500000	17000000	0.870588	0.8	-0.199938	-0.321928	5	FALSE	TRUE	TRUE	30	411	7.29927	Tmito	HSP78|SKD3|Q9H078	ENSG00000162129
MRPL49	39S ribosomal protein L49, mitochondrial OS=Homo sapiens GN=MRPL49 PE=1 SV=1	2	2	8		14000000	6400000	6000000			5800000	9200000	18000000	7300000	9300000		8800000	9920000	1.12727	0.753566	0.122879	1.15333e+07	7500000	1.31061	0.852273	0.390234	-0.230613	5	FALSE	FALSE	TRUE	13	411	3.16302	Tmito	C11orf4|L49mt|MRP-L49|NOF|NOF1|Q13405	ENSG00000149792
COX7A2	Cytochrome c oxidase subunit 7A2, mitochondrial OS=Homo sapiens GN=COX7A2 PE=4 SV=1	2	2	3		13000000							8300000		18000000		13000000	13150000	1.01154			13150000		1.01154	0	0.0165512		2	TRUE	FALSE	FALSE	12	411	2.91971	Tmito	COX7AL|COX7AL1|COXVIIAL|COXVIIa-L|VIIAL|P14406	ENSG00000112695
HCCS	Cytochrome c-type heme lyase OS=Homo sapiens GN=HCCS PE=1 SV=1	1	1	1		13000000											13000000	0	0					0	0			0	TRUE	FALSE	FALSE	6	411	1.45985	Tmito	CCHL|MCOPS7|MLS|P53701	ENSG00000004961
HIBADH	3-hydroxyisobutyrate dehydrogenase, mitochondrial OS=Homo sapiens GN=HIBADH PE=1 SV=2	2	2	9	29000000	31000000				5700000	25000000		6800000	26000000	22000000		30000000	17100000	0.57	0.0437708	1.35882	1.82667e+07	15350000	0.608889	0.511667	-0.715749	-0.966724	5	TRUE	FALSE	TRUE	5	411	1.21655	Tmito	NS5ATP1|P31937	ENSG00000106049
NDUFA7	NADH dehydrogenase [ubiquinone] 1 alpha subcomplex subunit 7 OS=Homo sapiens GN=NDUFA7 PE=1 SV=3	1	1	1								9100000					0	9100000					9100000	0	100		6.64386	1	TRUE	FALSE	FALSE	0	411	0	Tmito	B14.5a|O95182	ENSG00000167774
ALDH9A1	4-trimethylaminobutyraldehyde dehydrogenase OS=Homo sapiens GN=ALDH9A1 PE=1 SV=3	2	2	3	8500000											13000000	8500000	13000000	1.52941			13000000		1.52941	0	0.612977		1	TRUE	FALSE	FALSE	40	411	9.73236	Tmito	ALDH4|ALDH7|ALDH9|E3|TMABADH|P49189	ENSG00000143149
MRPS18C	28S ribosomal protein S18c, mitochondrial OS=Homo sapiens GN=MRPS18C PE=1 SV=1	1	1	1	6000000												6000000	0	0					0	0			0	TRUE	FALSE	FALSE	0	411	0	Tmito	MRP-S18-1|MRPS18-1|Q9Y3D5	ENSG00000163319
ALDH6A1	Methylmalonate-semialdehyde dehydrogenase [acylating], mitochondrial OS=Homo sapiens GN=ALDH6A1 PE=1 SV=2	2	2	4		14000000									14000000	13000000	14000000	13500000	0.964286			13500000		0.964286	0	-0.0524674		2	TRUE	FALSE	FALSE	1	411	0.243309	Tmito	MMSADHA|MMSDH|Q02252	ENSG00000119711
FDXR	Isoform 3 of NADPH:adrenodoxin oxidoreductase, mitochondrial OS=Homo sapiens GN=FDXR	1	1	1		13000000											13000000	0	0					0	0			0	TRUE	FALSE	FALSE	7	411	1.70316	Tmito	ADXR|P22570	ENSG00000161513
TRAP1	Heat shock protein 75 kDa, mitochondrial OS=Homo sapiens GN=TRAP1 PE=1 SV=3	24	25	278	370000000	410000000	190000000	220000000	150000000	170000000	160000000	140000000	150000000	200000000	480000000	320000000	297500000	221250000	0.743697	0.306658	0.513345	287500000	155000000	0.966387	0.521008	-0.0493277	-0.940621	8	FALSE	TRUE	TRUE	118	411	28.7105	Tmito	HSP 75|HSP75|HSP90L|TRAP-1|Q12931	ENSG00000126602
ALDH2	Aldehyde dehydrogenase, mitochondrial OS=Homo sapiens GN=ALDH2 PE=1 SV=2	9	10	67	35000000	50000000	10000000	5700000	12000000	15000000	22000000	25000000	19000000	22000000	40000000	41000000	25175000	24500000	0.973188	0.954809	0.0200833	30500000	18500000	1.21152	0.734856	0.276817	-0.444467	8	FALSE	TRUE	TRUE	18	411	4.37956	Tmito	ALDH-E2|ALDHI|ALDM|P05091	ENSG00000111275
PPIF	Peptidyl-prolyl cis-trans isomerase F, mitochondrial OS=Homo sapiens GN=PPIF PE=1 SV=1	2	2	9	70000000						92000000	46000000			110000000	99000000	70000000	86750000	1.23929			104500000	69000000	1.49286	0.985714	0.578076	-0.0207586	4	TRUE	FALSE	TRUE	28	411	6.81265	Tmito	CYP3|CyP-M|Cyp-D|CypD|P30405	ENSG00000108179
IVD	Isovaleryl Coenzyme A dehydrogenase, isoform CRA_a OS=Homo sapiens GN=IVD PE=3 SV=1	3	3	6		22000000					9000000		9600000		7200000	17000000	22000000	10700000	0.486364			1.12667e+07	9000000	0.512121	0.409091	-0.965443	-1.28951	4	TRUE	TRUE	TRUE	10	411	2.43309	Tmito	ACAD2|P26440	ENSG00000128928
L2HGDH	L-2-hydroxyglutarate dehydrogenase, mitochondrial OS=Homo sapiens GN=L2HGDH PE=1 SV=3	1	1	6				8200000			7700000	6900000		8900000	16000000	8700000	8200000	9640000	1.17561			11200000	7300000	1.36585	0.890244	0.449803	-0.167727	5	TRUE	FALSE	TRUE	6	411	1.45985	Tmito	C14orf160|Q9H9P8	ENSG00000087299
SLC25A5	ADP/ATP translocase 2 OS=Homo sapiens GN=SLC25A5 PE=1 SV=7	2	7	54	55000000	78000000	17000000	23000000		46000000	15000000	40000000	30000000	43000000	20000000	41000000	43250000	3.35714e+07	0.776218	0.557033	0.254119	33500000	3.36667e+07	0.774566	0.77842	-0.368539	-0.361379	7	FALSE	TRUE	TRUE	223	411	54.2579	Tmito	2F1|AAC2|ANT2|T2|T3|P05141	ENSG00000005022
ACAA2	3-ketoacyl-CoA thiolase, mitochondrial OS=Homo sapiens GN=ACAA2 PE=1 SV=2	1	1	3										9700000	19000000	22000000	0	16900000				16900000		100	0	6.64386		3	TRUE	FALSE	FALSE	25	411	6.08273	Tmito	DSAEC|P42765	ENSG00000167315
MRPL30	Isoform 2 of 39S ribosomal protein L30, mitochondrial OS=Homo sapiens GN=MRPL30	1	1	1			6700000										6700000	0	0					0	0			0	TRUE	FALSE	FALSE	2	411	0.486618	Tmito	L28MT|L30MT|MRP-L28|MRP-L30|MRPL28|MRPL28M|RPML28|Q8TCC3	ENSG00000185414
DNAJA3	DnaJ homolog subfamily A member 3, mitochondrial OS=Homo sapiens GN=DNAJA3 PE=1 SV=2	2	2	3									11000000	13000000			0	12000000				12000000		100	0	6.64386		2	TRUE	FALSE	FALSE	33	411	8.0292	Tmito	HCA57|TID1|hTID-1|Q96EY1	ENSG00000103423
MRPS34	28S ribosomal protein S34, mitochondrial OS=Homo sapiens GN=MRPS34 PE=2 SV=2	3	3	14	11000000	17000000		5000000		12000000				11000000	11000000	10000000	11000000	11000000	1	1	0	1.06667e+07	12000000	0.969697	1.09091	-0.0443941	0.125531	4	FALSE	TRUE	TRUE	24	411	5.83942	Tmito	MRP-S12|MRP-S34|MRPS12|P82930	ENSG00000074071
ETFB	Isoform 2 of Electron transfer flavoprotein subunit beta OS=Homo sapiens GN=ETFB	8	8	44	89000000	37000000	21000000	17000000	22000000	28000000	47000000	25000000	23000000	32000000	74000000	82000000	41000000	41625000	1.01524	0.974596	0.0111753	52750000	30500000	1.28659	0.743902	0.363547	-0.426815	8	FALSE	TRUE	TRUE	24	411	5.83942	Tmito	MADD|P38117	ENSG00000105379
CHCHD3	Coiled-coil-helix-coiled-coil-helix domain-containing protein 3, mitochondrial OS=Homo sapiens GN=CHCHD3 PE=2 SV=1	1	1	3	5200000	6000000									2700000		5600000	2700000	0.482143			2700000		0.482143	0	-1.05247		1	TRUE	FALSE	FALSE	16	411	3.89294	Tmito	MINOS3|PPP1R22|Q9NX63	ENSG00000106554
ACSF3	Acyl-CoA synthetase family member 3, mitochondrial OS=Homo sapiens GN=ACSF3 PE=1 SV=3	1	1	1		19000000											19000000	0	0					0	0			0	TRUE	FALSE	FALSE	1	411	0.243309	Tmito	Q4G176	ENSG00000176715
POLDIP2	Polymerase delta-interacting protein 2 OS=Homo sapiens GN=POLDIP2 PE=1 SV=1	8	8	26	21000000	22000000	7800000		13000000	14000000	17000000	18000000	12000000	20000000	38000000	19000000	1.69333e+07	18875000	1.11467	0.739594	0.131007	22250000	15500000	1.31398	0.915354	0.393939	-0.127598	8	FALSE	TRUE	TRUE	36	411	8.75912	Tmito	PDIP38|POLD4|Q9Y2S7	ENSG00000004142
SLC25A10	Mitochondrial dicarboxylate carrier OS=Homo sapiens GN=SLC25A10 PE=2 SV=1	1	7	64	14000000												14000000	0	0					0	0			0	TRUE	TRUE	TRUE	32	411	7.78589	Tmito	DIC|Q9UBX3	ENSG00000183048
PDK3	Isoform 2 of [Pyruvate dehydrogenase (acetyl-transferring)] kinase isozyme 3, mitochondrial OS=Homo sapiens GN=PDK3	2	2	3									5500000	8800000			0	7150000				7150000		100	0	6.64386		2	TRUE	FALSE	FALSE	6	411	1.45985	Tmito	CMTX6|GS1-358P8.4|Q15120	ENSG00000067992
MRPL22	39S ribosomal protein L22, mitochondrial OS=Homo sapiens GN=MRPL22 PE=2 SV=1	1	1	6		18000000						11000000	8800000	12000000	9000000	10000000	18000000	10160000	0.564444			9950000	11000000	0.552778	0.611111	-0.855228	-0.710493	5	TRUE	FALSE	TRUE	22	411	5.3528	Tmito	L22mt|MRP-L22|MRP-L25|RPML25|Q9NWU5	ENSG00000082515
IDH2	Isocitrate dehydrogenase [NADP], mitochondrial OS=Homo sapiens GN=IDH2 PE=1 SV=2	6	6	21	29000000	42000000	6100000	7200000	16000000		13000000	8100000	12000000	8800000	31000000	25000000	21075000	1.62714e+07	0.772073	0.634772	0.197382	19200000	1.23667e+07	0.911032	0.586793	-0.134426	-0.769076	7	FALSE	TRUE	TRUE	19	411	4.62287	Tmito	D2HGA2|ICD-M|IDH|IDHM|IDP|IDPM|mNADP-IDH|P48735	ENSG00000182054
GCDH	Glutaryl-CoA dehydrogenase, mitochondrial OS=Homo sapiens GN=GCDH PE=1 SV=1	5	5	31	32000000	22000000		18000000	15000000	8800000	38000000	19000000	27000000	20000000	35000000	16000000	24000000	22350000	0.93125	0.775565	0.110382	24500000	20200000	1.02083	0.841667	0.0297473	-0.248679	8	FALSE	TRUE	TRUE	9	411	2.18978	Tmito	ACAD5|GCD|Q92947	ENSG00000105607
PPA2	Isoform 2 of Inorganic pyrophosphatase 2, mitochondrial OS=Homo sapiens GN=PPA2	3	3	17	25000000	28000000			10000000		15000000	14000000	13000000	12000000	25000000	29000000	26500000	1.68571e+07	0.636119	0.018705	1.72804	19750000	13000000	0.745283	0.490566	-0.42414	-1.02748	7	TRUE	TRUE	TRUE	25	411	6.08273	Tmito	SID6-306|Q9H2U2	ENSG00000138777
MRPL9	39S ribosomal protein L9, mitochondrial OS=Homo sapiens GN=MRPL9 PE=1 SV=2	1	1	1	14000000												14000000	0	0					0	0			0	TRUE	FALSE	FALSE	12	411	2.91971	Tmito	L9mt|Q9BYD2	ENSG00000143436
CHCHD10	Coiled-coil-helix-coiled-coil-helix domain-containing protein 10, mitochondrial OS=Homo sapiens GN=CHCHD10 PE=2 SV=1	1	1	3			9600000								21000000		9600000	21000000	2.1875			21000000		2.1875	0	1.12928		1	TRUE	FALSE	FALSE	0	411	0	Tmito	C22orf16|N27C7-4|Q8WYQ3	ENSG00000250479
CBR4	Carbonyl reductase family member 4 OS=Homo sapiens GN=CBR4 PE=1 SV=3	1	1	1												30000000	0	30000000				30000000		100	0	6.64386		1	TRUE	FALSE	FALSE	0	411	0	Tmito	SDR45C1|Q8N4T8	ENSG00000145439
HAGH	Hydroxyacylglutathione hydrolase, mitochondrial OS=Homo sapiens GN=HAGH PE=1 SV=2	1	1	4	21000000				12000000				13000000		28000000		21000000	1.76667e+07	0.84127			20500000	12000000	0.97619	0.571429	-0.0347654	-0.807355	3	TRUE	FALSE	FALSE	47	411	11.4355	Tmito	GLO2|GLX2|GLXII|HAGH1|Q16775	ENSG00000063854
SLIRP	SRA stem-loop-interacting RNA-binding protein, mitochondrial OS=Homo sapiens GN=SLIRP PE=2 SV=1	7	7	151	200000000	190000000	75000000	48000000	680000000	970000000	740000000	940000000	870000000	980000000	310000000	360000000	128250000	731250000	5.70175	0.000230881	3.63661	630000000	832500000	4.91228	6.49123	2.29639	2.69849	8	TRUE	TRUE	TRUE	53	411	12.8954	Tmito	C14orf156|DC50|PD04872|Q9GZT3	ENSG00000119705
NDUFA8	NADH dehydrogenase [ubiquinone] 1 alpha subcomplex subunit 8 OS=Homo sapiens GN=NDUFA8 PE=1 SV=3	3	3	14	21000000	12000000				11000000	13000000	9300000	6500000	9300000	8900000	10000000	16500000	9.71429e+06	0.588745	0.367395	0.434867	8675000	11100000	0.525758	0.672727	-0.92753	-0.571906	7	FALSE	TRUE	TRUE	4	411	0.973236	Tmito	CI-19KD|CI-PGIV|PGIV|P51970	ENSG00000119421
GLS	Isoform 3 of Glutaminase kidney isoform, mitochondrial OS=Homo sapiens GN=GLS	6	6	41	30000000	22000000					17000000	11000000	12000000	14000000	35000000	36000000	26000000	2.08333e+07	0.801282	0.449095	0.347661	24250000	14000000	0.932692	0.538462	-0.100527	-0.893085	6	FALSE	TRUE	TRUE	17	411	4.13625	Tmito	AAD20|GAC|GAM|GLS1|KGA|O94925	ENSG00000115419
FAHD2A	Fumarylacetoacetate hydrolase domain-containing protein 2A OS=Homo sapiens GN=FAHD2A PE=1 SV=1	4	4	12	32000000	20000000	12000000	14000000	30000000		27000000		9700000	15000000	32000000		19500000	22740000	1.16615	0.622836	0.205626	18900000	28500000	0.969231	1.46154	-0.0450879	0.547488	5	FALSE	TRUE	TRUE	1	411	0.243309	Tmito	Q96GK7	ENSG00000115042
HSD17B8	Estradiol 17-beta-dehydrogenase 8 OS=Homo sapiens GN=HSD17B8 PE=1 SV=2	1	1	2		4100000									3500000		4100000	3500000	0.853659			3500000		0.853659	0	-0.228269		1	TRUE	FALSE	FALSE	0	411	0	Tmito	D6S2245E|FABG|FABGL|H2-KE6|HKE6|KE6|RING2|SDR30C1|dJ1033B10.9|Q92506	ENSG00000112474
HINT2	Histidine triad nucleotide-binding protein 2, mitochondrial OS=Homo sapiens GN=HINT2 PE=1 SV=1	3	3	11	73000000	15000000			25000000		53000000			14000000	80000000	23000000	44000000	39000000	0.886364	0.893841	0.0487395	39000000	39000000	0.886364	0.886364	-0.174029	-0.174029	5	FALSE	TRUE	TRUE	3	411	0.729927	Tmito	HIT-17|Q9BX68	ENSG00000137133
MRPS5	28S ribosomal protein S5, mitochondrial OS=Homo sapiens GN=MRPS5 PE=1 SV=2	2	2	2	4700000												4700000	0	0					0	0			0	TRUE	FALSE	FALSE	32	411	7.78589	Tmito	MRP-S5|S5mt|P82675	ENSG00000144029
SPRYD4	SPRY domain-containing protein 4 OS=Homo sapiens GN=SPRYD4 PE=1 SV=2	1	1	1											12000000		0	12000000				12000000		100	0	6.64386		1	TRUE	FALSE	FALSE	3	411	0.729927	Tmito	Q8WW59	ENSG00000176422
LIPT2	Putative lipoyltransferase 2, mitochondrial OS=Homo sapiens GN=LIPT2 PE=3 SV=1	1	1	1										18000000			0	18000000				18000000		100	0	6.64386		1	TRUE	FALSE	FALSE	0	411	0	Tpossible_mito	A6NK58	ENSG00000175536
MRPS26	28S ribosomal protein S26, mitochondrial OS=Homo sapiens GN=MRPS26 PE=1 SV=1	1	1	1									9300000				0	9300000				9300000		100	0	6.64386		1	TRUE	FALSE	FALSE	20	411	4.86618	Tmito	C20orf193|GI008|MRP-S13|MRP-S26|MRPS13|NY-BR-87|RPMS13|dJ534B8.3|Q9BYN8	ENSG00000125901
STOML2	Stomatin-like protein 2, mitochondrial OS=Homo sapiens GN=STOML2 PE=1 SV=1	3	3	3		16000000		2100000									9050000	0	0					0	0			0	TRUE	TRUE	FALSE	32	411	7.78589	Tmito	SLP-2|Q9UJZ1	ENSG00000165283
GLDC	Glycine dehydrogenase (decarboxylating), mitochondrial OS=Homo sapiens GN=GLDC PE=1 SV=2	1	1	2		8700000							5100000				8700000	5100000	0.586207			5100000		0.586207	0	-0.770518		1	TRUE	FALSE	FALSE	2	411	0.486618	Tmito	GCE|GCSP|HYGN1|P23378	ENSG00000178445
SSBP1	Single-stranded DNA-binding protein, mitochondrial OS=Homo sapiens GN=SSBP1 PE=1 SV=1	9	9	246	780000000	800000000	470000000	590000000	350000000	410000000	470000000	520000000	450000000	670000000	440000000	430000000	660000000	467500000	0.708333	0.0865061	1.06295	497500000	437500000	0.753788	0.662879	-0.407769	-0.593183	8	FALSE	TRUE	TRUE	78	411	18.9781	Tmito	Mt-SSB|SOSS-B1|SSBP|mtSSB|Q04837	ENSG00000106028
MRPS10	28S ribosomal protein S10, mitochondrial OS=Homo sapiens GN=MRPS10 PE=1 SV=2	3	3	6	76000000	29000000	12000000					18000000				9100000	39000000	13550000	0.347436	0.314057	0.502992	9100000	18000000	0.233333	0.461538	-2.09954	-1.11548	2	FALSE	TRUE	TRUE	5	411	1.21655	Tmito	MRP-S10|PNAS-122|P82664	ENSG00000048544
AK4	Adenylate kinase 4, mitochondrial OS=Homo sapiens GN=AK4 PE=1 SV=1	2	2	7	13000000				3400000					7400000	23000000	13000000	13000000	11700000	0.9			1.44667e+07	3400000	1.11282	0.261538	0.154221	-1.9349	4	TRUE	FALSE	TRUE	3	411	0.729927	Tmito	AK 4|AK3|AK3L1|AK3L2|P27144	ENSG00000162433
ATAD3A	ATPase family AAA domain-containing protein 3A OS=Homo sapiens GN=ATAD3A PE=1 SV=2	1	1	1					20000000								0	20000000					20000000	0	100		6.64386	1	TRUE	FALSE	FALSE	87	411	21.1679	Tmito	Q9NVI7	ENSG00000197785
PTGES2	Prostaglandin E synthase 2 OS=Homo sapiens GN=PTGES2 PE=1 SV=1	7	7	57	46000000	27000000	18000000	21000000	49000000	34000000	44000000	28000000	33000000	37000000	47000000	21000000	28000000	36625000	1.30804	0.283412	0.547582	34500000	38750000	1.23214	1.38393	0.30117	0.468769	8	FALSE	TRUE	TRUE	3	411	0.729927	Tmito	C9orf15|GBF-1|GBF1|PGES2|mPGES-2|Q9H7Z7	ENSG00000148334
TXNRD2	Thioredoxin reductase 2, mitochondrial OS=Homo sapiens GN=TXNRD2 PE=1 SV=3	1	1	1													0	0						0	0			0	TRUE	FALSE	FALSE	0	411	0	Tmito	SELZ|TR|TR-BETA|TR3|TRXR2|Q9NNW7	ENSG00000184470
MRPS6	28S ribosomal protein S6, mitochondrial OS=Homo sapiens GN=MRPS6 PE=1 SV=3	2	2	2		19000000											19000000	0	0					0	0			0	TRUE	FALSE	FALSE	8	411	1.94647	Tmito	C21orf101|MRP-S6|RPMS6|S6mt|P82932	ENSG00000243927
SQRDL	Sulfide:quinone oxidoreductase, mitochondrial (Fragment) OS=Homo sapiens GN=SQRDL PE=4 SV=1	1	1	1	12000000												12000000	0	0					0	0			0	TRUE	FALSE	FALSE	2	411	0.486618	Tmito	PRO1975|Q9Y6N5	ENSG00000137767
MTHFD1L	Monofunctional C1-tetrahydrofolate synthase, mitochondrial OS=Homo sapiens GN=MTHFD1L PE=1 SV=1	20	20	168	110000000	80000000	37000000	43000000	43000000	34000000	51000000	35000000	27000000	31000000	39000000	28000000	67500000	36000000	0.533333	0.161222	0.792575	31250000	40750000	0.462963	0.603704	-1.11103	-0.728087	8	FALSE	TRUE	TRUE	75	411	18.2482	Tmito	FTHFSDC1|MTC1THFS|dJ292B18.2|Q6UB35	ENSG00000120254
ECI2	Enoyl-CoA delta isomerase 2, mitochondrial OS=Homo sapiens GN=ECI2 PE=1 SV=4	3	3	20	34000000	24000000			15000000	17000000	13000000	19000000	14000000	20000000	19000000	21000000	29000000	17250000	0.594828	0.244404	0.611892	18500000	16000000	0.637931	0.551724	-0.648528	-0.857981	8	FALSE	TRUE	TRUE	16	411	3.89294	Tmito	ACBD2|DRS-1|DRS1|HCA88|PECI|dJ1013A10.3|O75521	ENSG00000198721
ATP5H	ATP synthase subunit d, mitochondrial OS=Homo sapiens GN=ATP5H PE=1 SV=3	6	6	22	25000000	33000000	6700000	8000000	7900000		11000000	13000000	9500000	13000000	19000000	20000000	18175000	1.33429e+07	0.734132	0.516374	0.287036	15375000	1.06333e+07	0.845942	0.585053	-0.241369	-0.773361	7	FALSE	TRUE	TRUE	28	411	6.81265	Tmito	ATPQ|O75947	ENSG00000167863
ATP5L	ATP synthase subunit g, mitochondrial OS=Homo sapiens GN=ATP5L PE=1 SV=3	1	1	4	28000000	42000000									23000000	21000000	35000000	22000000	0.628571	0.309648	0.509132	22000000		0.628571	0	-0.669851		2	FALSE	FALSE	FALSE	22	411	5.3528	Tmito	ATP5JG|O75964	ENSG00000167283
CCDC58	Coiled-coil domain-containing protein 58 OS=Homo sapiens GN=CCDC58 PE=1 SV=1	1	1	5		56000000				19000000		28000000			53000000	75000000	56000000	43750000	0.78125			64000000	23500000	1.14286	0.419643	0.192645	-1.25277	4	TRUE	FALSE	TRUE	0	411	0	Tmito	Q4VC31	ENSG00000160124
MCCC2	Methylcrotonoyl-CoA carboxylase beta chain, mitochondrial OS=Homo sapiens GN=MCCC2 PE=1 SV=1	3	3	15	28000000	21000000		9900000	11000000	14000000	12000000	19000000	12000000	17000000	23000000	17000000	1.96333e+07	15625000	0.79584	0.530629	0.275209	17250000	14000000	0.878608	0.713073	-0.186709	-0.487878	8	FALSE	TRUE	TRUE	93	411	22.6277	Tmito	MCCB|Q9HCC0	ENSG00000131844
MCEE	Methylmalonyl-CoA epimerase, mitochondrial OS=Homo sapiens GN=MCEE PE=1 SV=1	1	1	2			30000000	39000000									34500000	0	0					0	0			0	TRUE	FALSE	FALSE	0	411	0	Tpossible_mito	GLOD2|Q96PE7	ENSG00000124370
MUT	Methylmalonyl-CoA mutase, mitochondrial OS=Homo sapiens GN=MUT PE=1 SV=4	2	2	4	11000000	16000000									11000000	15000000	13500000	13000000	0.962963	0.890844	0.0501984	13000000		0.962963	0	-0.0544478		2	FALSE	FALSE	FALSE	5	411	1.21655	Tmito	MCM|P22033	ENSG00000146085
DARS2	Aspartate--tRNA ligase, mitochondrial OS=Homo sapiens GN=DARS2 PE=1 SV=1	7	7	16	21000000	18000000					13000000	11000000	11000000	14000000	19000000	21000000	19500000	1.48333e+07	0.760684	0.110685	0.95591	16250000	12000000	0.833333	0.615385	-0.263034	-0.70044	6	FALSE	TRUE	TRUE	28	411	6.81265	Tmito	ASPRS|LBSL|MT-ASPRS|RP3-383J4.2|Q6PI48	ENSG00000117593
MRPL32	39S ribosomal protein L32, mitochondrial OS=Homo sapiens GN=MRPL32 PE=1 SV=1	1	1	1		21000000											21000000	0	0					0	0			0	TRUE	FALSE	FALSE	2	411	0.486618	Tmito	L32mt|MRP-L32|bMRP-59b|Q9BYC8	ENSG00000106591
ME2	NAD-dependent malic enzyme, mitochondrial OS=Homo sapiens GN=ME2 PE=1 SV=1	3	3	6										8400000	11000000	12000000	0	1.04667e+07				1.04667e+07		100	0	6.64386		3	TRUE	TRUE	TRUE	20	411	4.86618	Tmito	ODS1|P23368	ENSG00000082212
TUFM	Elongation factor Tu, mitochondrial OS=Homo sapiens GN=TUFM PE=1 SV=2	23	23	338	260000000	280000000	51000000	65000000	140000000	150000000	170000000	180000000	140000000	180000000	280000000	250000000	164000000	186250000	1.13567	0.74802	0.126087	212500000	160000000	1.29573	0.97561	0.373767	-0.0356239	8	FALSE	TRUE	TRUE	139	411	33.82	Tmito	COXPD4|EF-TuMT|EFTU|P43|P49411	ENSG00000178952
SLC30A9	Zinc transporter 9 OS=Homo sapiens GN=SLC30A9 PE=1 SV=1	1	1	1								2900000					0	2900000					2900000	0	100		6.64386	1	TRUE	FALSE	FALSE	1	411	0.243309	Tmito	C4orf1|GAC63|HUEL|ZNT9|Q6PML9	ENSG00000014824
TAMM41	Mitochondrial translocator assembly and maintenance protein 41 homolog OS=Homo sapiens GN=TAMM41 PE=1 SV=2	2	2	12	11000000	4500000	5300000	3500000			8400000	7300000	8400000	9100000	8400000	4600000	6075000	7700000	1.26749	0.420321	0.376419	7625000	7850000	1.25514	1.29218	0.327853	0.369808	6	FALSE	FALSE	TRUE	6	411	1.45985	Tmito	C3orf31|RAM41|TAM41|Q96BW9	ENSG00000144559
MFN2	Mitofusin-2 OS=Homo sapiens GN=MFN2 PE=1 SV=3	1	1	1						60000000							0	60000000					60000000	0	100		6.64386	1	TRUE	FALSE	FALSE	1	411	0.243309	Tmito	CMT2A|CMT2A2|CPRP1|HSG|MARF|O95140	ENSG00000116688
CHCHD4	Isoform 2 of Mitochondrial intermembrane space import and assembly protein 40 OS=Homo sapiens GN=CHCHD4	1	1	3		20000000					8100000					13000000	20000000	10550000	0.5275			13000000	8100000	0.65	0.405	-0.621488	-1.30401	2	TRUE	FALSE	FALSE	17	411	4.13625	Tmito	MIA40|TIMM40|Q8N4Q1	ENSG00000163528
NDUFAB1	Acyl carrier protein (Fragment) OS=Homo sapiens GN=NDUFAB1 PE=2 SV=1	2	5	605					7800000000	12000000000	5300000000	6300000000	6900000000	11000000000	1900000000	2300000000	0	6687500000	100	0.00124252	2.9057	5525000000	7850000000	100	100	6.64386	6.64386	8	TRUE	TRUE	TRUE	0	411	0	Tmito	ACP|FASN2A|SDAP|O14561	ENSG00000004779
NDUFAB1	Acyl carrier protein, mitochondrial OS=Homo sapiens GN=NDUFAB1 PE=1 SV=3	6	9	1793	52000000	37000000		14000000	61000000000	87000000000	110000000000	61000000000	100000000000	110000000000	47000000000	25000000000	3.43333e+07	75125000000	2188.11	0.000260852	3.58361	70500000000	79750000000	2053.4	2322.82	11.0038	11.1817	8	TRUE	TRUE	TRUE	0	411	0	Tmito	ACP|FASN2A|SDAP|O14561	ENSG00000004779
COA5	Cytochrome c oxidase assembly factor 5 OS=Homo sapiens GN=COA5 PE=1 SV=1	3	3	29	30000000	33000000	18000000	21000000	28000000	29000000	39000000	27000000	22000000	27000000	28000000	31000000	25500000	28875000	1.13235	0.43742	0.359102	27000000	30750000	1.05882	1.20588	0.0824622	0.270089	8	FALSE	TRUE	TRUE	0	411	0	Tmito	6330578E17Rik|C2orf64|Pet191|Q86WW8	ENSG00000183513
NDUFS3	NADH dehydrogenase [ubiquinone] iron-sulfur protein 3, mitochondrial OS=Homo sapiens GN=NDUFS3 PE=1 SV=1	4	4	21	33000000	10000000		4100000	21000000	16000000	30000000	15000000	17000000	16000000	23000000	11000000	15700000	18625000	1.18631	0.774591	0.110927	16750000	20500000	1.06688	1.30573	0.0933965	0.384859	8	FALSE	TRUE	TRUE	19	411	4.62287	Tmito	CI-30|O75489	ENSG00000213619
ACAD9	Acyl-CoA dehydrogenase family member 9, mitochondrial OS=Homo sapiens GN=ACAD9 PE=1 SV=1	11	11	53	29000000	18000000	11000000	9700000	15000000	22000000	16000000	20000000	29000000	32000000	26000000	7700000	16925000	20962500	1.23855	0.473136	0.325014	23675000	18250000	1.39882	1.07829	0.484209	0.108741	8	FALSE	TRUE	TRUE	11	411	2.6764	Tmito	NPD002|Q9H845	ENSG00000177646
ACOT13	Acyl-coenzyme A thioesterase 13 OS=Homo sapiens GN=ACOT13 PE=1 SV=1	3	3	9		24000000		7000000		3600000		13000000	9900000	14000000	27000000	37000000	15500000	1.74167e+07	1.12366	0.86593	0.062517	21975000	8300000	1.41774	0.535484	0.503595	-0.901085	6	FALSE	TRUE	TRUE	11	411	2.6764	Tpossible_mito	PNAS-27|THEM2|Q9NPJ3	ENSG00000112304
DHRS4	Dehydrogenase/reductase SDR family member 4 OS=Homo sapiens GN=DHRS4 PE=1 SV=3	9	9	111	97000000	75000000	47000000	52000000	48000000	41000000	130000000	85000000	51000000	66000000	67000000	46000000	67750000	66750000	0.98524	0.950165	0.022201	57500000	76000000	0.848708	1.12177	-0.236659	0.165778	8	FALSE	TRUE	TRUE	3	411	0.729927	Tpossible_mito	CR|NRDR|PHCR|PSCD|SCAD-SRL|SDR-SRL|SDR25C1|SDR25C2|Q9BTZ2	ENSG00000157326
GBAS	Protein NipSnap homolog 2 OS=Homo sapiens GN=GBAS PE=1 SV=1	4	4	14						23000000	10000000	17000000	13000000	16000000	6300000	9900000	0	13600000	100	0.000650799	3.18655	11300000	1.66667e+07	100	100	6.64386	6.64386	7	TRUE	TRUE	TRUE	13	411	3.16302	Tmito	NIPSNAP2|O75323	ENSG00000146729
MRPS30	28S ribosomal protein S30, mitochondrial OS=Homo sapiens GN=MRPS30 PE=1 SV=2	1	1	1	14000000												14000000	0	0					0	0			0	TRUE	FALSE	FALSE	14	411	3.40633	Tmito	MRP-S30|PAP|PDCD9|S30mt|Q9NP92	ENSG00000112996
SCO2	Protein SCO2 homolog, mitochondrial OS=Homo sapiens GN=SCO2 PE=1 SV=3	1	1	10	16000000	17000000		16000000	7700000	5100000	8500000	9200000	7500000		12000000	12000000	1.63333e+07	8.85714e+06	0.542274	0.000116762	3.9327	10500000	7625000	0.642857	0.466837	-0.63743	-1.09901	7	TRUE	FALSE	TRUE	19	411	4.62287	Tmito	CEMCOX1|MYP6|SCO1L|O43819	ENSG00000130489
HSD17B10	3-hydroxyacyl-CoA dehydrogenase type-2 OS=Homo sapiens GN=HSD17B10 PE=1 SV=3	14	14	290	240000000	210000000	61000000	83000000	130000000	120000000	160000000	130000000	120000000	110000000	190000000	160000000	148500000	140000000	0.942761	0.863773	0.0636003	145000000	135000000	0.976431	0.909091	-0.03441	-0.137504	8	FALSE	TRUE	TRUE	107	411	26.0341	Tmito	17b-HSD10|ABAD|CAMR|DUPXp11.22|ERAB|HADH2|HCD2|MHBD|MRPP2|MRX17|MRX31|MRXS10|SCHAD|SDR5C1|Q99714	ENSG00000072506
ZADH2	Zinc-binding alcohol dehydrogenase domain-containing protein 2 OS=Homo sapiens GN=ZADH2 PE=1 SV=1	1	1	10	13000000	27000000	6200000		7300000	15000000	14000000	19000000	14000000	17000000		9500000	15400000	1.36857e+07	0.888683	0.808837	0.0921388	13500000	13825000	0.876623	0.897727	-0.189971	-0.155651	7	FALSE	FALSE	TRUE	4	411	0.973236	Tpossible_mito	Q8N4Q0	ENSG00000180011
ALDH1B1	Aldehyde dehydrogenase X, mitochondrial OS=Homo sapiens GN=ALDH1B1 PE=1 SV=3	5	6	9		23000000								15000000	13000000	13000000	23000000	1.36667e+07	0.594203			1.36667e+07		0.594203	0	-0.750972		3	TRUE	TRUE	TRUE	20	411	4.86618	Tmito	ALDH5|ALDHX|P30837	ENSG00000137124
CHCHD1	Coiled-coil-helix-coiled-coil-helix domain-containing protein 1 OS=Homo sapiens GN=CHCHD1 PE=1 SV=1	2	2	23	38000000	52000000	17000000	16000000	25000000	31000000	22000000	27000000	24000000	33000000	20000000		30750000	26000000	0.845528	0.627542	0.202357	2.56667e+07	26250000	0.834688	0.853659	-0.26069	-0.228269	7	FALSE	FALSE	TRUE	26	411	6.32603	Tmito	C10orf34|C2360|MRP-S37|Q96BP2	ENSG00000172586
TIMM8A	Mitochondrial import inner membrane translocase subunit Tim8 A OS=Homo sapiens GN=TIMM8A PE=1 SV=1	4	4	28	26000000	38000000	15000000	30000000		20000000	19000000	26000000	21000000	23000000	30000000	35000000	27250000	2.48571e+07	0.912189	0.671893	0.1727	27250000	2.16667e+07	1	0.795107	0	-0.330779	7	FALSE	TRUE	TRUE	35	411	8.51582	Tmito	DDP|DDP1|DFN1|MTS|TIM8|O60220	ENSG00000126953
GSTK1	Glutathione S-transferase kappa 1 OS=Homo sapiens GN=GSTK1 PE=1 SV=3	3	3	15	30000000	33000000			17000000			22000000	22000000	23000000	30000000	32000000	31500000	2.43333e+07	0.772487	0.0444969	1.35167	26750000	19500000	0.849206	0.619048	-0.235813	-0.691878	6	TRUE	TRUE	TRUE	10	411	2.43309	Tmito	GST|GST 13-13|GST13|GST13-13|GSTK1-1|hGSTK1|Q9Y2Q3	ENSG00000197448
HSPE1	10 kDa heat shock protein, mitochondrial OS=Homo sapiens GN=HSPE1 PE=1 SV=2	5	5	91	390000000	1000000000	250000000	340000000	250000000	410000000	460000000	470000000	250000000	340000000	1100000000	1100000000	495000000	547500000	1.10606	0.811608	0.0906537	697500000	397500000	1.40909	0.80303	0.494765	-0.316474	8	FALSE	TRUE	TRUE	85	411	20.6813	Tmito	CPN10|EPF|GROES|HSP10|P61604	ENSG00000115541
MRPL54	39S ribosomal protein L54, mitochondrial OS=Homo sapiens GN=MRPL54 PE=1 SV=1	3	3	14	21000000	24000000				18000000		22000000	13000000	16000000	16000000	25000000	22500000	1.83333e+07	0.814815	0.146495	0.834177	17500000	20000000	0.777778	0.888889	-0.36257	-0.169925	6	FALSE	TRUE	TRUE	14	411	3.40633	Tmito	L54mt|MRP-L54|Q6P161	ENSG00000183617
ICT1	Peptidyl-tRNA hydrolase ICT1, mitochondrial OS=Homo sapiens GN=ICT1 PE=1 SV=1	2	2	5	10000000	14000000					5600000		7600000				12000000	6600000	0.55	0.180629	0.743213	7600000	5600000	0.633333	0.466667	-0.658963	-1.09954	2	FALSE	FALSE	TRUE	17	411	4.13625	Tmito	DS-1|DS1|MRP-L58|Q14197	ENSG00000167862
TRIAP1	TP53-regulated inhibitor of apoptosis 1 OS=Homo sapiens GN=TRIAP1 PE=1 SV=1	1	1	2		4700000									4700000		4700000	4700000	1			4700000		1	0	0		1	TRUE	FALSE	FALSE	0	411	0	Tmito	MDM35|P53CSV|WF-1|O43715	ENSG00000170855
PTCD3	Pentatricopeptide repeat domain-containing protein 3, mitochondrial OS=Homo sapiens GN=PTCD3 PE=1 SV=3	4	4	5	12000000	36000000									12000000		24000000	12000000	0.5			12000000		0.5	0	-1		1	TRUE	TRUE	TRUE	30	411	7.29927	Tmito	MRP-S39|Q96EY7	ENSG00000132300
AK2	Adenylate kinase 2, mitochondrial OS=Homo sapiens GN=AK2 PE=1 SV=2	10	10	96	97000000	130000000	31000000	41000000	39000000	31000000	69000000	67000000	55000000	79000000	120000000	110000000	74750000	71250000	0.953177	0.898634	0.0464169	91000000	51500000	1.21739	0.688963	0.283793	-0.537501	8	FALSE	TRUE	TRUE	44	411	10.7056	Tmito	ADK2|AK 2|P54819	ENSG00000004455
C7orf55	UPF0562 protein C7orf55 OS=Homo sapiens GN=C7orf55 PE=1 SV=2	1	1	8	17000000						52000000	62000000	58000000	72000000	37000000	50000000	17000000	5.51667e+07	3.2451			54250000	57000000	3.19118	3.35294	1.67409	1.74543	6	TRUE	FALSE	TRUE				Tmito	FMC1	ENSG00000164898
C7orf55	Isoform 2 of UPF0562 protein C7orf55 OS=Homo sapiens GN=C7orf55	3	5	30	50000000	54000000	27000000	30000000	14000000	21000000	20000000	15000000	19000000	20000000	28000000	30000000	40250000	20875000	0.518634	0.0614286	1.21163	24250000	17500000	0.602484	0.434783	-0.731004	-1.20163	8	FALSE	TRUE	TRUE				Tmito	FMC1	ENSG00000164898
SFXN1	Sideroflexin-1 OS=Homo sapiens GN=SFXN1 PE=1 SV=4	1	1	1	11000000												11000000	0	0					0	0			0	TRUE	FALSE	FALSE	27	411	6.56934	Tmito	Q9H9B4	ENSG00000164466
GLRX5	Glutaredoxin-related protein 5, mitochondrial OS=Homo sapiens GN=GLRX5 PE=1 SV=2	2	2	21	26000000	29000000				17000000	24000000	24000000		18000000	41000000	37000000	27500000	2.68333e+07	0.975758	0.882749	0.0541629	32000000	2.16667e+07	1.16364	0.787879	0.21864	-0.343954	6	FALSE	FALSE	TRUE	4	411	0.973236	Tmito	C14orf87|FLB4739|GRX5|PR01238|PRO1238|Q86SX6	ENSG00000182512
MRPS11	28S ribosomal protein S11, mitochondrial OS=Homo sapiens GN=MRPS11 PE=1 SV=2	2	2	15	22000000	36000000			8000000	7200000	10000000	12000000	6300000	12000000	6600000	13000000	29000000	9387500	0.323707	0.212773	0.672084	9475000	9300000	0.326724	0.32069	-1.61386	-1.64075	8	FALSE	FALSE	TRUE	7	411	1.70316	Tmito	HCC-2|P82912	ENSG00000181991
ECI1	Enoyl-CoA delta isomerase 1, mitochondrial OS=Homo sapiens GN=ECI1 PE=1 SV=1	4	4	13	24000000	18000000	8200000	9800000		15000000		21000000	17000000	22000000	20000000	23000000	15000000	1.96667e+07	1.31111	0.302016	0.51997	20500000	18000000	1.36667	1.2	0.450661	0.263034	6	FALSE	TRUE	TRUE	9	411	2.18978	Tmito	DCI|P42126	ENSG00000167969
GATM	Glycine amidinotransferase, mitochondrial OS=Homo sapiens GN=GATM PE=1 SV=1	1	1	2	45000000									23000000			45000000	23000000	0.511111			23000000		0.511111	0	-0.968291		1	TRUE	FALSE	FALSE	1	411	0.243309	Tmito	AGAT|AT|CCDS3|P50440	ENSG00000171766
MRPL57	Ribosomal protein 63, mitochondrial OS=Homo sapiens GN=MRPL57 PE=1 SV=1	1	1	2			15000000	17000000									16000000	0	0					0	0			0	TRUE	FALSE	FALSE				Tmito	MRP63|bMRP63|Q9BQC6	ENSG00000173141
ECHDC1	Ethylmalonyl-CoA decarboxylase (Fragment) OS=Homo sapiens GN=ECHDC1 PE=4 SV=1	1	1	10	19000000	23000000			42000000	73000000		15000000	13000000	20000000	17000000	22000000	21000000	2.88571e+07	1.37415	0.385227	0.414283	18000000	4.33333e+07	0.857143	2.06349	-0.222392	1.04509	7	FALSE	FALSE	TRUE	3	411	0.729927	Tnon_mito	HEL-S-76|MMCD|dJ351K20.2|Q9NTX5	ENSG00000093144
NDUFA4	NADH dehydrogenase [ubiquinone] 1 alpha subcomplex subunit 4 OS=Homo sapiens GN=NDUFA4 PE=1 SV=1	1	1	5	23000000	27000000						14000000	9400000			16000000	25000000	1.31333e+07	0.525333	0.0311297	1.50683	12700000	14000000	0.508	0.56	-0.9771	-0.836501	3	TRUE	FALSE	TRUE	7	411	1.70316	Tmito	CI-9k|CI-MLRQ|MLRQ|O00483	ENSG00000189043
APOA1BP	NAD(P)H-hydrate epimerase OS=Homo sapiens GN=APOA1BP PE=1 SV=2	1	1	1											18000000		0	18000000				18000000		100	0	6.64386		1	TRUE	FALSE	FALSE	5	411	1.21655	Tmito	AIBP|YJEFN1|Q8NCW5	ENSG00000163382
HSD17B4	Peroxisomal multifunctional enzyme type 2 OS=Homo sapiens GN=HSD17B4 PE=1 SV=3	33	33	571	130000000	92000000	47000000	44000000	1300000000	1100000000	1400000000	620000000	1600000000	1400000000	370000000	220000000	78250000	1001250000	12.7955	0.0015594	2.80704	897500000	1105000000	11.4696	14.1214	3.51975	3.81981	8	TRUE	TRUE	TRUE	68	411	16.545	Tpossible_mito	DBP|MFE-2|MPF-2|PRLTS1|SDR8C1|P51659	ENSG00000133835
OAT	Ornithine aminotransferase, mitochondrial OS=Homo sapiens GN=OAT PE=1 SV=1	16	16	193	110000000	110000000	35000000	45000000	95000000	81000000	130000000	85000000	92000000	95000000	160000000	150000000	75000000	111000000	1.48	0.181626	0.740822	124250000	97750000	1.65667	1.30333	0.728283	0.382206	8	FALSE	TRUE	TRUE	95	411	23.1144	Tmito	GACR|HOGA|OATASE|OKT|P04181	ENSG00000065154
MRPL50	39S ribosomal protein L50, mitochondrial OS=Homo sapiens GN=MRPL50 PE=1 SV=2	4	4	21	24000000	22000000	11000000	15000000	20000000	22000000		26000000	5900000	21000000	11000000	21000000	18000000	1.81286e+07	1.00714	0.975412	0.010812	14725000	2.26667e+07	0.818056	1.25926	-0.289729	0.332575	7	FALSE	TRUE	TRUE	2	411	0.486618	Tmito	MRP-L50|Q8N5N7	ENSG00000136897
CHCHD7	Isoform 4 of Coiled-coil-helix-coiled-coil-helix domain-containing protein 7 OS=Homo sapiens GN=CHCHD7	3	3	18			8500000		80000000	57000000	72000000	52000000	40000000	80000000	33000000	34000000	8500000	56000000	6.58824			46750000	65250000	5.5	7.67647	2.45943	2.94044	8	TRUE	TRUE	TRUE	0	411	0	Tpossible_mito	COX23|Q9BUK0	ENSG00000170791
SHMT2	Serine hydroxymethyltransferase, mitochondrial OS=Homo sapiens GN=SHMT2 PE=1 SV=3	16	16	125	110000000	75000000	26000000	21000000	53000000	34000000	37000000	34000000	40000000	58000000	140000000	73000000	58000000	58625000	1.01078	0.980712	0.0084585	77750000	39500000	1.34052	0.681034	0.42279	-0.5542	8	FALSE	TRUE	TRUE	101	411	24.5742	Tmito	GLYA|HEL-S-51e|SHMT|P34897	ENSG00000182199
MTHFD2	Bifunctional methylenetetrahydrofolate dehydrogenase/cyclohydrolase, mitochondrial OS=Homo sapiens GN=MTHFD2 PE=1 SV=2	9	9	112	190000000	130000000	96000000	110000000	140000000	110000000	200000000	88000000	150000000	180000000	160000000	60000000	131500000	136000000	1.03422	0.870463	0.0602499	137500000	134500000	1.04563	1.02281	0.0643688	0.0325434	8	FALSE	TRUE	TRUE	29	411	7.05596	Tmito	NMDMC|P13995	ENSG00000065911
RMDN1	Regulator of microtubule dynamics protein 1 OS=Homo sapiens GN=RMDN1 PE=1 SV=1	3	3	14	7600000	13000000			15000000	20000000	12000000	11000000	20000000	20000000	11000000	13000000	10300000	15250000	1.48058	0.273228	0.563474	16000000	14500000	1.5534	1.40777	0.635428	0.493409	8	FALSE	TRUE	TRUE	1	411	0.243309	Tmito	FAM82B|RMD-1|RMD1|Q96DB5	ENSG00000176623
MRPL14	39S ribosomal protein L14, mitochondrial OS=Homo sapiens GN=MRPL14 PE=1 SV=1	2	2	9	16000000	32000000	5600000	8600000				9300000		13000000	10000000	9600000	15550000	10475000	0.673633	0.455049	0.341941	1.08667e+07	9300000	0.698821	0.598071	-0.517005	-0.741612	4	FALSE	FALSE	TRUE	17	411	4.13625	Tmito	L14mt|L32mt|MRP-L14|MRP-L32|MRPL32|RMPL32|RPML32|Q6P1L8	ENSG00000180992
RDH13	Retinol dehydrogenase 13 OS=Homo sapiens GN=RDH13 PE=1 SV=2	2	2	4					8100000		2900000	7900000		10000000				7225000		0.0175876	1.75479	10000000	6300000	100	100	6.64386	6.64386	4	TRUE	FALSE	FALSE	5	411	1.21655	Tpossible_mito	SDR7C3|Q8NBN7	ENSG00000160439
TRMT2B	tRNA (uracil(54)-C(5))-methyltransferase homolog OS=Homo sapiens GN=TRMT2B PE=2 SV=1	13	13	104					47000000	52000000	45000000	49000000	74000000	77000000	41000000	30000000	0	51875000	100	3.80908e-05	4.41918	55500000	48250000	100	100	6.64386	6.64386	8	TRUE	TRUE	TRUE	0	411	0	Tmito	CXorf34|dJ341D10.3|Q96GJ1	ENSG00000188917
GSR	Glutathione reductase, mitochondrial OS=Homo sapiens GN=GSR PE=1 SV=2	4	4	11	25000000	29000000	11000000				13000000	17000000	13000000		32000000	24000000	2.16667e+07	19800000	0.913846	0.790972	0.101839	23000000	15000000	1.06154	0.692308	0.0861566	-0.530515	5	FALSE	TRUE	TRUE	13	411	3.16302	Tmito	HEL-75|P00390	ENSG00000104687
BCAT2	Branched-chain-amino-acid aminotransferase (Fragment) OS=Homo sapiens GN=BCAT2 PE=2 SV=1	1	1	1												16000000	0	16000000				16000000		100	0	6.64386		1	TRUE	FALSE	FALSE	1	411	0.243309	Tmito	BCAM|BCATM|BCT2|PP18|O15382	ENSG00000105552
MRPS22	28S ribosomal protein S22, mitochondrial OS=Homo sapiens GN=MRPS22 PE=1 SV=1	6	6	20	26000000	29000000		8900000	13000000	9000000		12000000	7000000	12000000	15000000		21300000	1.13333e+07	0.532081	0.249988	0.602082	1.13333e+07	1.13333e+07	0.532081	0.532081	-0.910281	-0.910281	6	FALSE	TRUE	TRUE	32	411	7.78589	Tmito	C3orf5|COXPD5|GIBT|MRP-S22|RPMS22|P82650	ENSG00000175110
LAP3	Cytosol aminopeptidase OS=Homo sapiens GN=LAP3 PE=1 SV=3	4	4	15	12000000	22000000	4800000	5200000	11000000	12000000	11000000	13000000	11000000	13000000	18000000	21000000	11000000	13750000	1.25	0.554352	0.256214	15750000	11750000	1.43182	1.06818	0.517848	0.0951572	8	FALSE	TRUE	TRUE	20	411	4.86618	Tmito	HEL-S-106|LAP|LAPEP|PEPS|P28838	ENSG00000002549
GLUD1	Glutamate dehydrogenase 1, mitochondrial OS=Homo sapiens GN=GLUD1 PE=1 SV=2	11	11	85	89000000	100000000	23000000	34000000	38000000	40000000	46000000	50000000	47000000	62000000	120000000	100000000	61500000	62875000	1.02236	0.95285	0.0209757	82250000	43500000	1.3374	0.707317	0.419429	-0.499571	8	FALSE	TRUE	TRUE	90	411	21.8978	Tmito	GDH|GDH1|GLUD|P00367	ENSG00000148672
HMGCL	Hydroxymethylglutaryl-CoA lyase, mitochondrial OS=Homo sapiens GN=HMGCL PE=1 SV=2	2	2	2									6500000	6800000			0	6650000				6650000		100	0	6.64386		2	TRUE	FALSE	FALSE	1	411	0.243309	Tmito	HL|P35914	ENSG00000117305
MRPS33	28S ribosomal protein S33, mitochondrial OS=Homo sapiens GN=MRPS33 PE=1 SV=1	1	1	3		18000000					8200000					10000000	18000000	9100000	0.505556			10000000	8200000	0.555556	0.455556	-0.847997	-1.1343	2	TRUE	FALSE	FALSE	6	411	1.45985	Tmito	MRP-S33|PTD003|S33mt|Q9Y291	ENSG00000090263
NUBPL	Iron-sulfur protein NUBPL OS=Homo sapiens GN=NUBPL PE=1 SV=3	2	2	4	6000000						8600000				8900000	7700000	6000000	8400000	1.4			8300000	8600000	1.38333	1.43333	0.468149	0.519374	3	TRUE	FALSE	FALSE	2	411	0.486618	Tmito	C14orf127|IND1|huInd1|Q8TB37	ENSG00000151413
GADD45GIP1	Growth arrest and DNA damage-inducible proteins-interacting protein 1 OS=Homo sapiens GN=GADD45GIP1 PE=1 SV=1	2	2	3		16000000					16000000						16000000	16000000	1				16000000	0	1		0	1	TRUE	FALSE	FALSE	22	411	5.3528	Tmito	CKBBP2|CKbetaBP2|CRIF1|MRP-L59|PLINP|PLINP-1|PRG6|Plinp1|Q8TAE8	ENSG00000179271
TFAM	Transcription factor A, mitochondrial OS=Homo sapiens GN=TFAM PE=1 SV=1	2	2	12	27000000	28000000	11000000			16000000	17000000	17000000	15000000	17000000	23000000	24000000	22000000	1.84286e+07	0.837662	0.586897	0.231438	19750000	1.66667e+07	0.897727	0.757576	-0.155651	-0.400538	7	FALSE	FALSE	TRUE	21	411	5.10949	Tmito	MTTF1|MTTFA|TCF6|TCF6L1|TCF6L2|TCF6L3|Q00059	ENSG00000108064
ALDH18A1	Delta-1-pyrroline-5-carboxylate synthase OS=Homo sapiens GN=ALDH18A1 PE=1 SV=2	23	23	147	180000000	150000000	32000000	35000000	56000000	42000000	64000000	52000000	58000000	62000000	130000000	80000000	99250000	68000000	0.685139	0.482108	0.316855	82500000	53500000	0.831234	0.539043	-0.266673	-0.891528	8	FALSE	TRUE	TRUE	93	411	22.6277	Tmito	ARCL3A|GSAS|P5CS|PYCS|P54886	ENSG00000059573
OXSM	3-oxoacyl-[acyl-carrier-protein] synthase, mitochondrial OS=Homo sapiens GN=OXSM PE=1 SV=1	4	4	5					36000000				10000000	18000000			0	2.13333e+07				14000000	36000000	100	100	6.64386	6.64386	3	TRUE	TRUE	TRUE	0	411	0	Tmito	FASN2D|KASI|KS|Q9NWU1	ENSG00000151093
TARS2	Threonine--tRNA ligase, mitochondrial OS=Homo sapiens GN=TARS2 PE=1 SV=1	6	6	24	19000000	17000000	4700000	6200000	13000000	17000000	14000000	12000000	14000000	18000000	8500000	19000000	11725000	14437500	1.23134	0.523792	0.280842	14875000	14000000	1.26866	1.19403	0.343302	0.255839	8	FALSE	TRUE	TRUE	23	411	5.59611	Tmito	TARSL1|thrRS|Q9BW92	ENSG00000143374
TBRG4	Protein TBRG4 OS=Homo sapiens GN=TBRG4 PE=1 SV=1	5	5	30	19000000	20000000	15000000		12000000	12000000	20000000	14000000	12000000	15000000	16000000	19000000	18000000	15000000	0.833333	0.18233	0.739141	15500000	14500000	0.861111	0.805556	-0.215729	-0.311944	8	FALSE	TRUE	TRUE	9	411	2.18978	Tmito	CPR2|FASTKD4|Q969Z0	ENSG00000136270
PRDX5	Peroxiredoxin-5, mitochondrial OS=Homo sapiens GN=PRDX5 PE=1 SV=4	6	6	14	46000000	40000000					24000000		17000000		33000000	60000000	43000000	33500000	0.77907	0.397703	0.400442	3.66667e+07	24000000	0.852713	0.55814	-0.229868	-0.841302	4	FALSE	TRUE	TRUE	26	411	6.32603	Tmito	ACR1|AOEB166|B166|HEL-S-55|PLP|PMP20|PRDX6|PRXV|prx-V|P30044	ENSG00000126432
COASY	Isoform 2 of Bifunctional coenzyme A synthase OS=Homo sapiens GN=COASY	1	1	5		66000000	19000000		14000000		17000000		16000000				42500000	1.56667e+07	0.368627	0.45771	0.339409	16000000	15500000	0.376471	0.364706	-1.40939	-1.45519	3	FALSE	FALSE	TRUE	2	411	0.486618	Tmito	DPCK|NBP|PPAT|UKR1|pOV-2|Q13057	ENSG00000068120
CISD3	CDGSH iron-sulfur domain-containing protein 3, mitochondrial OS=Homo sapiens GN=CISD3 PE=1 SV=1	2	2	6		11000000					6500000		11000000	12000000	9800000		11000000	9825000	0.893182			1.09333e+07	6500000	0.993939	0.590909	-0.00877021	-0.758992	4	TRUE	FALSE	TRUE	4	411	0.973236	Tmito	Miner2|P0C7P0	ENSG00000230055
ACAA1	3-ketoacyl-CoA thiolase, peroxisomal OS=Homo sapiens GN=ACAA1 PE=1 SV=2	2	2	2						18000000						5800000	0	11900000				5800000	18000000	100	100	6.64386	6.64386	2	TRUE	FALSE	FALSE	4	411	0.973236	Tpossible_mito	ACAA|PTHIO|THIO|P09110	ENSG00000060971
GRPEL2	GrpE protein homolog 2, mitochondrial OS=Homo sapiens GN=GRPEL2 PE=1 SV=1	1	1	1									2500000				0	2500000				2500000		100	0	6.64386		1	TRUE	FALSE	FALSE	4	411	0.973236	Tmito	Mt-GrpE#2|Q8TAA5	ENSG00000164284
ALDH7A1	Alpha-aminoadipic semialdehyde dehydrogenase OS=Homo sapiens GN=ALDH7A1 PE=1 SV=5	6	6	15	29000000	25000000		7400000	4400000		8100000	12000000		16000000	22000000	30000000	2.04667e+07	1.54167e+07	0.753257	0.551856	0.258175	2.26667e+07	8.16667e+06	1.10749	0.399023	0.147296	-1.32546	6	FALSE	TRUE	TRUE	37	411	9.00243	Tmito	ATQ1|EPD|PDE|P49419	ENSG00000164904
CECR5	Cat eye syndrome critical region protein 5 OS=Homo sapiens GN=CECR5 PE=1 SV=1	2	2	20	24000000	22000000			8000000		12000000	15000000	13000000	14000000	25000000	27000000	23000000	1.62857e+07	0.708075	0.0497889	1.30287	19750000	1.16667e+07	0.858696	0.507246	-0.219781	-0.979241	7	TRUE	FALSE	TRUE	12	411	2.91971	Tmito	Q9BXW7	ENSG00000069998
MRPL39	Isoform 2 of 39S ribosomal protein L39, mitochondrial OS=Homo sapiens GN=MRPL39	2	2	5			5100000	8800000		6600000			5800000				6950000	6200000	0.892086	0.755313	0.121873	5800000	6600000	0.834532	0.94964	-0.26096	-0.074547	2	FALSE	FALSE	TRUE	25	411	6.08273	Tmito	C21orf92|L39mt|MRP-L5|MRPL5|PRED22|PRED66|RPML5|Q9NYK5	ENSG00000154719
FUNDC2	FUN14 domain-containing protein 2 OS=Homo sapiens GN=FUNDC2 PE=1 SV=2	1	1	1													0	0						0	0			0	TRUE	FALSE	FALSE	0	411	0	Tpossible_mito	DC44|HCBP6|HCC3|PD03104|Q9BWH2	ENSG00000165775
MMAB	Cob(I)yrinic acid a,c-diamide adenosyltransferase, mitochondrial OS=Homo sapiens GN=MMAB PE=1 SV=1	4	4	32	18000000	20000000	9100000	8400000	12000000	9500000	15000000	14000000	13000000	14000000	19000000	22000000	13875000	14812500	1.06757	0.789444	0.102678	17000000	12625000	1.22523	0.90991	0.293047	-0.136204	8	FALSE	TRUE	TRUE	0	411	0	Tmito	ATR|cblB|cob|Q96EY8	ENSG00000139428
PPOX	Protoporphyrinogen oxidase OS=Homo sapiens GN=PPOX PE=1 SV=1	4	4	13	6300000	9600000	4800000		11000000	13000000	12000000	13000000	17000000	16000000	12000000	13000000	6900000	13375000	1.93841	0.0247052	1.60721	14500000	12250000	2.10145	1.77536	1.07138	0.828113	8	TRUE	TRUE	TRUE	6	411	1.45985	Tmito	PPO|V290M|VP|P50336	ENSG00000143224
ABCD3	ATP-binding cassette sub-family D member 3 OS=Homo sapiens GN=ABCD3 PE=2 SV=1	1	1	2	49000000										42000000		49000000	42000000	0.857143			42000000		0.857143	0	-0.222392		1	TRUE	FALSE	FALSE	40	411	9.73236	Tmito	ABC43|PMP70|PXMP1|ZWS2|P28288	ENSG00000117528
MRPL45	39S ribosomal protein L45, mitochondrial OS=Homo sapiens GN=MRPL45 PE=1 SV=2	1	1	1		10000000											10000000	0	0					0	0			0	TRUE	FALSE	FALSE	14	411	3.40633	Tmito	L45mt|MRP-L45|B4DEF8	ENSG00000174100
CPOX	Oxygen-dependent coproporphyrinogen-III oxidase, mitochondrial OS=Homo sapiens GN=CPOX PE=1 SV=3	10	10	94	70000000	43000000	41000000	42000000	36000000	39000000	41000000	63000000	42000000	82000000	45000000	45000000	49000000	49125000	1.00255	0.989221	0.00470689	53500000	44750000	1.09184	0.913265	0.126757	-0.130894	8	FALSE	TRUE	TRUE	6	411	1.45985	Tmito	CPO|CPX|HCP|P36551	ENSG00000080819
SLC16A1	Monocarboxylate transporter 1 OS=Homo sapiens GN=SLC16A1 PE=1 SV=3	1	1	1													0	0						0	0			0	TRUE	FALSE	FALSE	47	411	11.4355	Tpossible_mito	HHF7|MCT|MCT1|P53985	ENSG00000155380
DIABLO	Diablo homolog, mitochondrial OS=Homo sapiens GN=DIABLO PE=1 SV=1	7	7	66	91000000	100000000	54000000	65000000	27000000	36000000	46000000	59000000	31000000	33000000	43000000	66000000	77500000	42625000	0.55	0.0388087	1.41107	43250000	42000000	0.558065	0.541935	-0.841496	-0.883807	8	TRUE	TRUE	TRUE	49	411	11.9221	Tmito	DFNA64|SMAC|Q9NR28	ENSG00000184047
TTC19	Tetratricopeptide repeat protein 19, mitochondrial OS=Homo sapiens GN=TTC19 PE=1 SV=4	2	2	4	13000000	4300000									9200000		8650000	9200000	1.06358			9200000		1.06358	0	0.0889337		1	TRUE	FALSE	FALSE	0	411	0	Tmito	2010204O13Rik|MC3DN2|Q6DKK2	ENSG00000011295
GCSH	Glycine cleavage system H protein, mitochondrial OS=Homo sapiens GN=GCSH PE=1 SV=2	2	2	11	25000000	36000000					20000000	21000000		17000000	30000000	32000000	30500000	24000000	0.786885	0.427804	0.368755	2.63333e+07	20500000	0.863388	0.672131	-0.211919	-0.573185	5	FALSE	FALSE	TRUE	3	411	0.729927	Tmito	GCE|NKH|P23434	ENSG00000140905
SDR39U1	Isoform 2 of Epimerase family protein SDR39U1 OS=Homo sapiens GN=SDR39U1	3	3	11	11000000		3500000	8400000	22000000	12000000	16000000		17000000	9400000		21000000	7.63333e+06	1.62333e+07	2.12664	0.0322886	1.49095	15800000	1.66667e+07	2.06987	2.18341	1.04954	1.12658	6	TRUE	TRUE	TRUE	1	411	0.243309	Tnon_mito	C14orf124|HCDI|Q9NRG7	ENSG00000100445
FAHD1	Isoform 3 of Acylpyruvase FAHD1, mitochondrial OS=Homo sapiens GN=FAHD1	2	3	7	140000000	140000000	630000000								14000000	17000000	3.03333e+08	15500000	0.0510989	0.220078	0.657424	15500000		0.0510989	0	-4.29056		2	FALSE	TRUE	TRUE	2	411	0.486618	Tmito	C16orf36|YISKL|Q6P587	ENSG00000180185
MDH1	Isoform 3 of Malate dehydrogenase, cytoplasmic OS=Homo sapiens GN=MDH1	4	4	6				12000000							23000000	25000000	12000000	24000000	2			24000000		2	0	1		2	TRUE	TRUE	TRUE	31	411	7.54258	Tpossible_mito	HEL-S-32|MDH-s|MDHA|MGC:1375|MOR2|P40925	ENSG00000014641
MRPS31	28S ribosomal protein S31, mitochondrial OS=Homo sapiens GN=MRPS31 PE=1 SV=3	5	5	10	27000000	28000000		7700000			7400000				15000000		20900000	11200000	0.535885	0.295385	0.529611	15000000	7400000	0.717703	0.354067	-0.47854	-1.49791	2	FALSE	TRUE	TRUE	31	411	7.54258	Tmito	IMOGN38|MRP-S31|S31mt|Q92665	ENSG00000102738
HADHB	Trifunctional enzyme subunit beta, mitochondrial OS=Homo sapiens GN=HADHB PE=1 SV=3	13	13	97	61000000	84000000	35000000	45000000	33000000	46000000	44000000	55000000	45000000	64000000	38000000	50000000	56250000	46875000	0.833333	0.454888	0.342095	49250000	44500000	0.875556	0.791111	-0.191729	-0.338048	8	FALSE	TRUE	TRUE	47	411	11.4355	Tmito	ECHB|MTPB|TP-BETA|P55084	ENSG00000138029
GLYCTK	Glycerate kinase OS=Homo sapiens GN=GLYCTK PE=1 SV=1	1	1	1					380000000								0	380000000					380000000	0	100		6.64386	1	TRUE	FALSE	FALSE	1	411	0.243309	Tpossible_mito	HBEBP2|HBEBP4|HBeAgBP4A|Q8IVS8	ENSG00000168237
AARS2	Alanine--tRNA ligase, mitochondrial OS=Homo sapiens GN=AARS2 PE=1 SV=1	7	7	30	12000000	16000000			5100000	8200000	8200000	8800000	9000000	12000000	12000000	13000000	14000000	9537500	0.68125	0.224472	0.648837	11500000	7575000	0.821429	0.541071	-0.283793	-0.886109	8	FALSE	TRUE	TRUE	12	411	2.91971	Tmito	AARSL|COXPD8|MT-ALARS|MTALARS|Q5JTZ9	ENSG00000124608
CHCHD2	Coiled-coil-helix-coiled-coil-helix domain-containing protein 2, mitochondrial OS=Homo sapiens GN=CHCHD2 PE=1 SV=1	3	3	79	170000000	180000000	110000000	130000000	78000000	91000000	90000000	100000000	71000000	110000000	110000000	140000000	147500000	98750000	0.669492	0.050821	1.29396	107750000	89750000	0.730508	0.608475	-0.453027	-0.716731	8	FALSE	TRUE	TRUE	35	411	8.51582	Tmito	C7orf17|Q9Y6H1	ENSG00000106153
ELAC2	Zinc phosphodiesterase ELAC protein 2 OS=Homo sapiens GN=ELAC2 PE=1 SV=2	1	1	2											13000000	15000000	0	14000000				14000000		100	0	6.64386		2	TRUE	FALSE	FALSE	16	411	3.89294	Tmito	COXPD17|ELC2|HPC2|Q9BQ52	ENSG00000006744
FIS1	Mitochondrial fission 1 protein OS=Homo sapiens GN=FIS1 PE=1 SV=2	1	1	1											12000000		0	12000000				12000000		100	0	6.64386		1	TRUE	FALSE	FALSE	2	411	0.486618	Tmito	TTC11|Q9Y3D6	ENSG00000214253
ACLY	ATP-citrate synthase OS=Homo sapiens GN=ACLY PE=1 SV=3	12	12	33	65000000	24000000	11000000	21000000	18000000		34000000			10000000	46000000	20000000	30250000	25600000	0.846281	0.745821	0.127366	2.53333e+07	26000000	0.837466	0.859504	-0.255898	-0.218424	5	FALSE	TRUE	TRUE	118	411	28.7105	Tmito	ACL|ATPCL|CLATP|P53396	ENSG00000131473
PCK2	Phosphoenolpyruvate carboxykinase [GTP], mitochondrial OS=Homo sapiens GN=PCK2 PE=1 SV=3	1	1	1											8800000		0	8800000				8800000		100	0	6.64386		1	TRUE	FALSE	FALSE	5	411	1.21655	Tmito	PEPCK|PEPCK-M|PEPCK2|Q16822	ENSG00000100889
NADK2	NAD kinase 2, mitochondrial OS=Homo sapiens GN=NADK2 PE=1 SV=2	1	1	1	30000000												30000000	0	0					0	0			0	TRUE	FALSE	FALSE	9	411	2.18978	Tmito	C5orf33|MNADK|NADKD1|Q4G0N4	ENSG00000152620
ALDH5A1	Isoform 2 of Succinate-semialdehyde dehydrogenase, mitochondrial OS=Homo sapiens GN=ALDH5A1	3	3	4	14000000	23000000		8100000									1.50333e+07	0	0					0	0			0	TRUE	TRUE	FALSE	18	411	4.37956	Tmito	SSADH|SSDH|P51649	ENSG00000112294
CKMT1A	Creatine kinase U-type, mitochondrial OS=Homo sapiens GN=CKMT1A PE=1 SV=1	10	10	63	87000000	73000000	28000000	35000000	25000000	20000000	56000000	41000000	23000000	42000000	100000000	88000000	55750000	49375000	0.88565	0.733065	0.134858	63250000	35500000	1.13453	0.636771	0.182094	-0.651153	8	FALSE	TRUE	TRUE	19	411	4.62287	Tmito	CKMT1	ENSG00000223572
FAM136A	Protein FAM136A OS=Homo sapiens GN=FAM136A PE=2 SV=1	6	6	34	43000000	30000000	17000000	22000000	28000000	32000000	28000000	29000000	26000000	31000000	36000000	49000000	28000000	32375000	1.15625	0.519383	0.284512	35500000	29250000	1.26786	1.04464	0.342392	0.0630098	8	FALSE	TRUE	TRUE	5	411	1.21655	Tmito	Q96C01	ENSG00000035141
GPI	Isoform 2 of Glucose-6-phosphate isomerase OS=Homo sapiens GN=GPI	3	3	3												17000000	0	17000000				17000000		100	0	6.64386		1	TRUE	TRUE	FALSE	61	411	14.8418	Tnon_mito	AMF|GNPI|NLK|PGI|PHI|SA-36|SA36|P06744	ENSG00000105220
NDUFAF2	Mimitin, mitochondrial OS=Homo sapiens GN=NDUFAF2 PE=1 SV=1	2	2	13		17000000		7400000		8500000		16000000	12000000	14000000	6600000	17000000	12200000	12350000	1.0123	0.980451	0.00857412	12400000	12250000	1.01639	1.0041	0.023459	0.0059006	6	FALSE	FALSE	TRUE	2	411	0.486618	Tmito	B17.2L|MMTN|NDUFA12L|mimitin|Q8N183	ENSG00000164182
ALDH3A2	Isoform 2 of Fatty aldehyde dehydrogenase OS=Homo sapiens GN=ALDH3A2	8	8	45	29000000	30000000	12000000	21000000	25000000	35000000	27000000	25000000	26000000	31000000	29000000	34000000	23000000	29000000	1.26087	0.25096	0.600395	30000000	28000000	1.30435	1.21739	0.383329	0.283793	8	FALSE	TRUE	TRUE	29	411	7.05596	Tpossible_mito	ALDH10|FALDH|SLS|P51648	ENSG00000072210
ACSL6	Isoform 1 of Long-chain-fatty-acid--CoA ligase 6 OS=Homo sapiens GN=ACSL6	1	1	3			160000000	200000000			45000000						180000000	45000000	0.25				45000000	0	0.25		-2	1	TRUE	FALSE	FALSE	0	411	0	Tpossible_mito	ACS2|FACL6|LACS 6|LACS2|LACS5|Q9UKU0	ENSG00000164398
ABHD10	Mycophenolic acid acyl-glucuronide esterase, mitochondrial OS=Homo sapiens GN=ABHD10 PE=1 SV=1	3	3	4		14000000									18000000	6800000	14000000	12400000	0.885714			12400000		0.885714	0	-0.175087		2	TRUE	TRUE	FALSE	7	411	1.70316	Tmito	Q9NUJ1	ENSG00000144827
HINT3	Histidine triad nucleotide-binding protein 3 OS=Homo sapiens GN=HINT3 PE=1 SV=1	1	1	2										13000000		12000000	0	12500000				12500000		100	0	6.64386		2	TRUE	FALSE	FALSE	1	411	0.243309	Tpossible_mito	HINT4|Q9NQE9	ENSG00000111911
CYB5B	Cytochrome b5 type B OS=Homo sapiens GN=CYB5B PE=3 SV=1	3	3	38	69000000	110000000	24000000	26000000	59000000	58000000	88000000	71000000	52000000	55000000	82000000	53000000	57250000	64750000	1.131	0.74231	0.129415	60500000	69000000	1.05677	1.20524	0.0796594	0.269321	8	FALSE	TRUE	TRUE	8	411	1.94647	Tmito	CYB5-M|CYPB5M|OMB5|RP11-140H17.1|O43169	ENSG00000103018
GRSF1	G-rich sequence factor 1 OS=Homo sapiens GN=GRSF1 PE=1 SV=3	6	6	28	22000000	33000000	11000000	12000000	12000000	11000000	17000000	17000000	14000000	17000000	21000000	17000000	19500000	15750000	0.807692	0.523421	0.281149	17250000	14250000	0.884615	0.730769	-0.176878	-0.452512	8	FALSE	TRUE	TRUE	25	411	6.08273	Tmito	Q12849	ENSG00000132463
MRPS18B	28S ribosomal protein S18b, mitochondrial OS=Homo sapiens GN=MRPS18B PE=1 SV=1	4	4	27	37000000	39000000	17000000	18000000	14000000	15000000	21000000	23000000	14000000	19000000	21000000	23000000	27750000	18750000	0.675676	0.227446	0.643122	19250000	18250000	0.693694	0.657658	-0.527629	-0.604591	8	FALSE	TRUE	TRUE	27	411	6.56934	Tmito	C6orf14|HSPC183|HumanS18a|MRP-S18-2|MRPS18-2|PTD017|S18amt|Q9Y676	ENSG00000203624
CAT	Catalase OS=Homo sapiens GN=CAT PE=1 SV=3	5	5	35	23000000	25000000	9000000	10000000	8800000	12000000	13000000	15000000	10000000	12000000	20000000	22000000	16750000	14100000	0.841791	0.589773	0.229315	16000000	12200000	0.955224	0.728358	-0.0660892	-0.45728	8	FALSE	TRUE	TRUE	37	411	9.00243	Tpossible_mito	P04040	ENSG00000121691
ACOT9	Isoform 4 of Acyl-coenzyme A thioesterase 9, mitochondrial OS=Homo sapiens GN=ACOT9	2	2	2			5100000	1700000									3400000	0	0					0	0			0	TRUE	FALSE	FALSE	16	411	3.89294	Tmito	ACATE2|MT-ACT48|MTACT48|Q9Y305	ENSG00000123130
STARD7	StAR-related lipid transfer protein 7, mitochondrial OS=Homo sapiens GN=STARD7 PE=1 SV=2	1	1	1											5200000		0	5200000				5200000		100	0	6.64386		1	TRUE	FALSE	FALSE	0	411	0	Tmito	GTT1|Q9NQZ5	ENSG00000084090
HTATIP2	Isoform 3 of Oxidoreductase HTATIP2 OS=Homo sapiens GN=HTATIP2	1	1	2	13000000								7500000				13000000	7500000	0.576923			7500000		0.576923	0	-0.793549		1	TRUE	FALSE	FALSE	1	411	0.243309	Tnon_mito	CC3|SDR44U1|TIP30|Q9BUP3	ENSG00000109854
AKR7A2	Aflatoxin B1 aldehyde reductase member 2 OS=Homo sapiens GN=AKR7A2 PE=1 SV=3	1	1	3		14000000									13000000	12000000	14000000	12500000	0.892857			12500000		0.892857	0	-0.163499		2	TRUE	FALSE	FALSE	10	411	2.43309	Tmito	AFAR|AFAR1|AFB1-AR1|AKR7|O43488	ENSG00000053371
DUT	Deoxyuridine 5'-triphosphate nucleotidohydrolase, mitochondrial OS=Homo sapiens GN=DUT PE=1 SV=4	3	3	8				11000000							13000000	13000000	11000000	13000000	1.18182			13000000		1.18182	0	0.241008		2	TRUE	TRUE	TRUE	55	411	13.382	Tmito	dUTPase|P33316	ENSG00000128951
NME4	Nucleoside diphosphate kinase OS=Homo sapiens GN=NME4 PE=2 SV=1	6	6	80	120000000	130000000	34000000	49000000	30000000	70000000	100000000	150000000	48000000	67000000	64000000	67000000	83250000	74500000	0.894895	0.764457	0.116647	61500000	87500000	0.738739	1.05105	-0.436864	0.0718327	8	FALSE	TRUE	TRUE	12	411	2.91971	Tmito	NDPK-D|NM23H4|nm23-H4|O00746	ENSG00000103202
PRDX6	Peroxiredoxin-6 OS=Homo sapiens GN=PRDX6 PE=1 SV=3	8	8	39	27000000	23000000	59000000	76000000							37000000	48000000	46250000	42500000	0.918919	0.801398	0.0961515	42500000		0.918919	0	-0.121991		2	FALSE	TRUE	TRUE	158	411	38.4428	Tpossible_mito	1-Cys|AOP2|HEL-S-128m|NSGPx|PRX|aiPLA2|p29|P30041	ENSG00000117592
TKT	Isoform 2 of Transketolase OS=Homo sapiens GN=TKT	5	5	14	8500000	43000000	11000000								51000000	64000000	2.08333e+07	57500000	2.76	0.0672674	1.1722	57500000		2.76	0	1.46467		2	FALSE	TRUE	TRUE	51	411	12.4088	Tnon_mito	HEL107|TK|TKT1|P29401	ENSG00000163931
NIPSNAP1	Protein NipSnap homolog 1 OS=Homo sapiens GN=NIPSNAP1 PE=1 SV=1	6	6	40	93000000	41000000	34000000	14000000	76000000	59000000	92000000	31000000	46000000	51000000	76000000	31000000	45500000	57750000	1.26923	0.542851	0.265319	51000000	64500000	1.12088	1.41758	0.164631	0.503433	8	FALSE	TRUE	TRUE	14	411	3.40633	Tmito	Q9BPW8	ENSG00000184117
GARS	Glycine--tRNA ligase OS=Homo sapiens GN=GARS PE=1 SV=3	2	2	3				6100000							7600000	7400000	6100000	7500000	1.22951			7500000		1.22951	0	0.298081		2	TRUE	FALSE	FALSE	50	411	12.1655	Tpossible_mito	CMT2D|DSMAV|GlyRS|HMN5|SMAD1|P41250	ENSG00000106105
MRPL52	39S ribosomal protein L52, mitochondrial OS=Homo sapiens GN=MRPL52 PE=2 SV=2	1	1	3		11000000						10000000	6600000				11000000	8300000	0.754545			6600000	10000000	0.6	0.909091	-0.736966	-0.137504	2	TRUE	FALSE	FALSE	0	411	0	Tmito	Q86TS9	ENSG00000172590
GOT2	Aspartate aminotransferase, mitochondrial OS=Homo sapiens GN=GOT2 PE=1 SV=3	14	14	124	96000000	100000000	23000000	28000000	29000000	38000000	49000000	53000000	51000000	77000000	150000000	150000000	61750000	74625000	1.2085	0.649053	0.18772	107000000	42250000	1.73279	0.684211	0.7931	-0.547488	8	FALSE	TRUE	TRUE	24	411	5.83942	Tmito	KAT4|KATIV|mitAAT|P00505	ENSG00000125166
PTRH2	Peptidyl-tRNA hydrolase 2, mitochondrial OS=Homo sapiens GN=PTRH2 PE=2 SV=1	3	3	12		27000000		7100000	7800000	12000000	11000000	13000000	12000000	13000000	13000000	16000000	17050000	12225000	0.717009	0.712538	0.147192	13500000	10950000	0.791789	0.642229	-0.336812	-0.638841	8	FALSE	TRUE	TRUE	8	411	1.94647	Tmito	BIT1|PTH2|Q9Y3E5	ENSG00000141378
GSTO1	Glutathione S-transferase omega-1 OS=Homo sapiens GN=GSTO1 PE=1 SV=2	2	2	2			1900000								11000000		1900000	11000000	5.78947			11000000		5.78947	0	2.53343		1	TRUE	FALSE	FALSE	19	411	4.62287	Tnon_mito	GSTO 1-1|GSTTLp28|HEL-S-21|P28|SPG-R|P78417	ENSG00000148834
TMEM205	Transmembrane protein 205 OS=Homo sapiens GN=TMEM205 PE=1 SV=1	1	1	1		23000000											23000000	0	0					0	0			0	TRUE	FALSE	FALSE	1	411	0.243309	Tpossible_mito	UNQ501|Q6UW68	ENSG00000105518
MGST1	Microsomal glutathione S-transferase 1 OS=Homo sapiens GN=MGST1 PE=1 SV=1	1	1	7	16000000	27000000				15000000	11000000	17000000			15000000	22000000	21500000	16000000	0.744186	0.491922	0.308104	18500000	1.43333e+07	0.860465	0.666667	-0.216811	-0.584963	5	FALSE	FALSE	TRUE	0	411	0	Tpossible_mito	GST12|MGST|MGST-I|P10620	ENSG00000008394
COA4	Cytochrome c oxidase assembly factor 4 homolog, mitochondrial OS=Homo sapiens GN=COA4 PE=1 SV=2	2	2	10	34000000	42000000		4500000				20000000			33000000	32000000	2.68333e+07	2.83333e+07	1.0559	0.910845	0.0405556	32500000	20000000	1.21118	0.745342	0.276413	-0.424026	3	FALSE	FALSE	TRUE	0	411	0	Tpossible_mito	CHCHD8|CMC3|E2IG2|Q9NYJ1	ENSG00000181924
BAX	Isoform Beta of Apoptosis regulator BAX OS=Homo sapiens GN=BAX	1	1	9	6800000	13000000		8100000		9300000		7300000	6000000	10000000	11000000	9600000	9300000	8.86667e+06	0.953405	0.846517	0.0723641	9150000	8300000	0.983871	0.892473	-0.023459	-0.164119	6	FALSE	FALSE	TRUE	9	411	2.18978	Tmito	BCL2L4|Q07812	ENSG00000087088
MAVS	Mitochondrial antiviral-signaling protein OS=Homo sapiens GN=MAVS PE=1 SV=2	1	1	4		11000000								4500000	6300000	9300000	11000000	6700000	0.609091			6700000		0.609091	0	-0.715271		3	TRUE	FALSE	FALSE	11	411	2.6764	Tmito	CARDIF|IPS-1|IPS1|VISA|Q7Z434	ENSG00000088888
ARG2	Arginase-2, mitochondrial OS=Homo sapiens GN=ARG2 PE=1 SV=1	2	2	3		20000000										13000000	20000000	13000000	0.65			13000000		0.65	0	-0.621488		1	TRUE	FALSE	FALSE	0	411	0	Tmito	P78540	ENSG00000081181
CISD2	CDGSH iron-sulfur domain-containing protein 2 OS=Homo sapiens GN=CISD2 PE=2 SV=1	2	2	15	54000000	39000000			38000000	26000000	61000000	24000000	37000000	23000000	38000000	17000000	46500000	33000000	0.709677	0.271863	0.56565	28750000	37250000	0.61828	0.801075	-0.693669	-0.31999	8	FALSE	FALSE	TRUE	0	411	0	Tmito	ERIS|Miner1|NAF-1|WFS2|ZCD2|Q8N5K1	ENSG00000145354
ACSL1	Long-chain-fatty-acid--CoA ligase 1 OS=Homo sapiens GN=ACSL1 PE=1 SV=1	2	2	8			6500000	8000000	13000000	10000000				18000000	11000000	14000000	7250000	13200000	1.82069	0.0132339	1.87831	1.43333e+07	11500000	1.97701	1.58621	0.983321	0.665581	5	TRUE	FALSE	TRUE	2	411	0.486618	Tpossible_mito	ACS1|FACL1|FACL2|LACS|LACS1|LACS2|P33121	ENSG00000151726
HSDL1	Inactive hydroxysteroid dehydrogenase-like protein 1 OS=Homo sapiens GN=HSDL1 PE=1 SV=3	8	8	35	9100000	13000000		3200000	11000000	11000000	11000000	14000000	14000000	16000000	11000000	13000000	8.43333e+06	12625000	1.49704	0.276357	0.55853	13500000	11750000	1.60079	1.39328	0.678785	0.478486	8	FALSE	TRUE	TRUE	2	411	0.486618	Tmito	SDR12C3|Q3SXM5	ENSG00000103160
CBR3	Carbonyl reductase [NADPH] 3 OS=Homo sapiens GN=CBR3 PE=1 SV=3	1	1	1											21000000		0	21000000				21000000		100	0	6.64386		1	TRUE	FALSE	FALSE	33	411	8.0292	Tnon_mito	HEL-S-25|SDR21C2|hCBR3|O75828	ENSG00000159231
HEBP1	Heme-binding protein 1 OS=Homo sapiens GN=HEBP1 PE=1 SV=1	5	5	15				4300000	14000000		18000000	4400000	12000000	19000000	15000000	22000000	4300000	1.49143e+07	3.46844			17000000	1.21333e+07	3.95349	2.82171	1.98313	1.49657	7	TRUE	TRUE	TRUE	3	411	0.729927	Tmito	HBP|HEBP|Q9NRV9	ENSG00000013583
PTPMT1	Phosphatidylglycerophosphatase and protein-tyrosine phosphatase 1 OS=Homo sapiens GN=PTPMT1 PE=1 SV=1	2	2	7	13000000	7600000		4900000				5900000		9300000			8500000	7600000	0.894118	0.778497	0.108743	9300000	5900000	1.09412	0.694118	0.129768	-0.526748	2	FALSE	FALSE	TRUE	9	411	2.18978	Tmito	DUSP23|MOSP|PLIP|Q8WUK0	ENSG00000110536
PGAM5	Serine/threonine-protein phosphatase PGAM5, mitochondrial OS=Homo sapiens GN=PGAM5 PE=1 SV=2	2	2	5	12000000	13000000	34000000						4200000	4000000			1.96667e+07	4100000	0.208475	0.162149	0.790087	4100000		0.208475	0	-2.26206		2	FALSE	FALSE	TRUE	73	411	17.7616	Tmito	BXLBV68|Q96HS1	ENSG00000247077
DTYMK	Thymidylate kinase OS=Homo sapiens GN=DTYMK PE=1 SV=4	3	3	4	3300000										8100000	8300000	3300000	8200000	2.48485			8200000		2.48485	0	1.31316		2	TRUE	TRUE	FALSE	6	411	1.45985	Tpossible_mito	CDC8|PP3731|TMPK|TYMK|P23919	ENSG00000168393
KARS	Isoform Mitochondrial of Lysine--tRNA ligase OS=Homo sapiens GN=KARS	5	5	26	26000000	25000000	10000000	12000000		17000000	16000000	10000000	15000000	13000000	22000000	26000000	18250000	17000000	0.931507	0.801373	0.0961654	19000000	1.43333e+07	1.0411	0.785388	0.058103	-0.348522	7	FALSE	TRUE	TRUE	70	411	17.0316	Tmito	CMTRIB|DFNB89|KARS1|KARS2|KRS|Q15046	ENSG00000065427
FASN	Fatty acid synthase OS=Homo sapiens GN=FASN PE=1 SV=3	37	37	115	62000000	32000000	27000000	27000000	7700000	8600000	16000000	5000000	6800000	14000000	56000000	37000000	37000000	18887500	0.510473	0.133692	0.873895	28450000	9325000	0.768919	0.252027	-0.379097	-1.98835	8	FALSE	TRUE	TRUE	167	411	40.6326	Tpossible_mito	FAS|OA-519|SDR27X1|P49327	ENSG00000169710
ATXN2	Ataxin-2 OS=Homo sapiens GN=ATXN2 PE=1 SV=2	2	2	14	17000000	23000000	8600000	8800000		15000000	13000000	14000000		12000000	17000000	15000000	14350000	1.43333e+07	0.998839	0.996534	0.00150776	1.46667e+07	14000000	1.02207	0.97561	0.0314903	-0.0356239	6	FALSE	FALSE	TRUE	33	411	8.0292	Tnon_mito	ASL13|ATX2|SCA2|TNRC13|Q99700	ENSG00000204842
TRMT10C	Mitochondrial ribonuclease P protein 1 OS=Homo sapiens GN=TRMT10C PE=1 SV=2	5	5	11	34000000	26000000					36000000	23000000				12000000	30000000	2.36667e+07	0.788889	0.488382	0.311241	12000000	29500000	0.4	0.983333	-1.32193	-0.0242475	3	FALSE	TRUE	TRUE	21	411	5.10949	Tmito	HNYA|MRPP1|RG9MTD1|Q7L0Y3	ENSG00000174173
PYCR2	Pyrroline-5-carboxylate reductase 2 OS=Homo sapiens GN=PYCR2 PE=1 SV=1	3	4	40	47000000	52000000			34000000	28000000	34000000	26000000	31000000	35000000	61000000	42000000	49500000	36375000	0.734848	0.028046	1.55213	42250000	30500000	0.853535	0.616162	-0.228477	-0.698619	8	TRUE	TRUE	TRUE	32	411	7.78589	Tmito	P5CR2|Q96C36	ENSG00000143811
RPS18	40S ribosomal protein S18 OS=Homo sapiens GN=RPS18 PE=1 SV=3	8	8	177	630000000	710000000	380000000	510000000	180000000	200000000	180000000	250000000	180000000	290000000	410000000	470000000	557500000	270000000	0.484305	0.0178699	1.74788	337500000	202500000	0.605381	0.363229	-0.724084	-1.46105	8	TRUE	TRUE	TRUE	229	411	55.7178	Tnon_mito	D6S218E|HKE3|KE-3|KE3|S18|P62269	ENSG00000096150
RDH11	Retinol dehydrogenase 11 OS=Homo sapiens GN=RDH11 PE=1 SV=2	7	7	49	41000000	39000000	10000000	17000000	29000000	31000000	24000000	36000000	34000000	48000000	39000000	41000000	26750000	35250000	1.31776	0.364337	0.438497	40500000	30000000	1.51402	1.1215	0.598383	0.165424	8	FALSE	TRUE	TRUE	9	411	2.18978	Tnon_mito	ARSDR1|CGI82|HCBP12|MDT1|PSDR1|RALR1|SCALD|SDR7C1|Q8TC12	ENSG00000072042
HK1	Hexokinase-1 OS=Homo sapiens GN=HK1 PE=2 SV=1	13	13	43	23000000	26000000	5800000	8000000	7300000		14000000	13000000	12000000	11000000	29000000	24000000	15700000	1.57571e+07	1.00364	0.992668	0.00319615	19000000	1.14333e+07	1.21019	0.728238	0.275235	-0.457518	7	FALSE	TRUE	TRUE	37	411	9.00243	Tmito	HK1-ta|HK1-tb|HK1-tc|HKD|HKI|HMSNR|HXK1|P19367	ENSG00000156515
TARS	Isoform 2 of Threonine--tRNA ligase, cytoplasmic OS=Homo sapiens GN=TARS	4	4	8	23000000	13000000									22000000	16000000	18000000	19000000	1.05556	0.88262	0.0542264	19000000		1.05556	0	0.0780025		2	FALSE	TRUE	TRUE	65	411	15.8151	Tnon_mito	ThrRS|P26639	ENSG00000113407
PSMA6	Proteasome subunit alpha type OS=Homo sapiens GN=PSMA6 PE=3 SV=1	6	6	27	43000000	35000000	33000000	34000000	24000000		39000000	13000000	13000000		50000000	21000000	36250000	2.66667e+07	0.735632	0.188296	0.725158	28000000	2.53333e+07	0.772414	0.698851	-0.372554	-0.516944	6	FALSE	TRUE	TRUE	86	411	20.9246	Tpossible_mito	IOTA|PROS27|p27K|P60900	ENSG00000100902
MRPS36	28S ribosomal protein S36, mitochondrial OS=Homo sapiens GN=MRPS36 PE=1 SV=2	1	1	1		8400000											8400000	0	0					0	0			0	TRUE	FALSE	FALSE	10	411	2.43309	Tmito	MRP-S36|P82909	ENSG00000134056
PACSIN2	Protein kinase C and casein kinase substrate in neurons protein 2 OS=Homo sapiens GN=PACSIN2 PE=1 SV=2	2	2	5	14000000				7400000		8600000				15000000	17000000	14000000	12000000	0.857143			16000000	8000000	1.14286	0.571429	0.192645	-0.807355	4	TRUE	FALSE	TRUE	10	411	2.43309	Tnon_mito	SDPII|Q9UNF0	ENSG00000100266
MTHFD1	C-1-tetrahydrofolate synthase, cytoplasmic OS=Homo sapiens GN=MTHFD1 PE=2 SV=1	23	23	90	52000000	55000000	23000000	34000000	9700000		11000000	7500000	15000000	22000000	59000000	52000000	41000000	2.51714e+07	0.613937	0.189198	0.723084	37000000	9400000	0.902439	0.229268	-0.148099	-2.12489	7	FALSE	TRUE	TRUE	110	411	26.764	Tmito	MTHFC|MTHFD|P11586	ENSG00000100714
EEFSEC	Selenocysteine-specific elongation factor OS=Homo sapiens GN=EEFSEC PE=1 SV=4	1	1	1		5200000											5200000	0	0					0	0			0	TRUE	FALSE	FALSE	4	411	0.973236	Tpossible_mito	EFSEC|SELB|P57772	ENSG00000132394
DHCR24	Delta(24)-sterol reductase OS=Homo sapiens GN=DHCR24 PE=1 SV=2	1	1	8		27000000				17000000	16000000	20000000	14000000	19000000	17000000	19000000	27000000	1.74286e+07	0.645503			17250000	1.76667e+07	0.638889	0.654321	-0.646363	-0.61193	7	TRUE	FALSE	TRUE	3	411	0.729927	Tnon_mito	DCE|Nbla03646|SELADIN1|seladin-1|Q15392	ENSG00000116133
NUDT5	ADP-sugar pyrophosphatase OS=Homo sapiens GN=NUDT5 PE=2 SV=1	1	1	1											8900000		0	8900000				8900000		100	0	6.64386		1	TRUE	FALSE	FALSE	29	411	7.05596	Tnon_mito	YSA1|YSA1H|YSAH1|hYSAH1|Q9UKK9	ENSG00000165609
SOD1	Superoxide dismutase [Cu-Zn] OS=Homo sapiens GN=SOD1 PE=1 SV=2	5	5	15	28000000	24000000	19000000				18000000	12000000			41000000	24000000	2.36667e+07	23750000	1.00352	0.990776	0.00402461	32500000	15000000	1.37324	0.633803	0.457583	-0.657894	4	FALSE	TRUE	TRUE	31	411	7.54258	Tmito	ALS|ALS1|HEL-S-44|IPOA|SOD|hSod1|homodimer|P00441	ENSG00000142168
NDUFAF3	NADH dehydrogenase [ubiquinone] 1 alpha subcomplex assembly factor 3 OS=Homo sapiens GN=NDUFAF3 PE=1 SV=1	4	4	27	25000000	20000000			13000000	18000000	24000000	23000000	17000000	23000000	16000000	21000000	22500000	19375000	0.861111	0.405838	0.391647	19250000	19500000	0.855556	0.866667	-0.225067	-0.206451	8	FALSE	TRUE	TRUE	2	411	0.486618	Tmito	2P1|C3orf60|E3-3|Q9BU61	ENSG00000178057
TPI1	Triosephosphate isomerase OS=Homo sapiens GN=TPI1 PE=1 SV=3	13	13	124	120000000	95000000	34000000	44000000	18000000	15000000	34000000	25000000	21000000	21000000	260000000	200000000	73250000	74250000	1.01365	0.980625	0.00849686	125500000	23000000	1.71331	0.313993	0.776787	-1.67119	8	FALSE	TRUE	TRUE	90	411	21.8978	Tnon_mito	HEL-S-49|TIM|TPI|TPID|P60174	ENSG00000111669
FASTKD2	FAST kinase domain-containing protein 2 OS=Homo sapiens GN=FASTKD2 PE=1 SV=1	1	1	1									29000000				0	29000000				29000000		100	0	6.64386		1	TRUE	FALSE	FALSE	10	411	2.43309	Tmito	KIAA0971|Q9NYY8	ENSG00000118246
CYB5A	Cytochrome b5 OS=Homo sapiens GN=CYB5A PE=1 SV=2	3	3	18	36000000	26000000	11000000	12000000	19000000	18000000	20000000	18000000	18000000	20000000	24000000	30000000	21250000	20875000	0.982353	0.954975	0.0200082	23000000	18750000	1.08235	0.882353	0.114171	-0.180572	8	FALSE	TRUE	TRUE	3	411	0.729927	Tpossible_mito	CYB5|MCB5|P00167	ENSG00000166347
GAPDH	Glyceraldehyde-3-phosphate dehydrogenase OS=Homo sapiens GN=GAPDH PE=1 SV=3	13	13	151	190000000	200000000	98000000	110000000	25000000	51000000	59000000	62000000	61000000	92000000	360000000	390000000	149500000	137500000	0.919732	0.842071	0.0746512	225750000	49250000	1.51003	0.329431	0.594581	-1.60195	8	FALSE	TRUE	TRUE	248	411	60.3406	Tpossible_mito	G3PD|GAPD|HEL-S-162eP|P04406	ENSG00000111640
PI4KA	Phosphatidylinositol 4-kinase alpha OS=Homo sapiens GN=PI4KA PE=2 SV=1	1	1	1			3300000										3300000	0	0					0	0			0	TRUE	FALSE	FALSE	14	411	3.40633	Tnon_mito	PI4K-ALPHA|PIK4CA|pi4K230|P42356	ENSG00000241973
PNPT1	Polyribonucleotide nucleotidyltransferase 1, mitochondrial OS=Homo sapiens GN=PNPT1 PE=1 SV=2	4	4	9	23000000	16000000					13000000				18000000	19000000	19500000	1.66667e+07	0.854701	0.565268	0.247746	18500000	13000000	0.948718	0.666667	-0.0759489	-0.584963	3	FALSE	TRUE	TRUE	21	411	5.10949	Tmito	COXPD13|DFNB70|OLD35|PNPASE|old-35|Q8TCS8	ENSG00000138035
SCP2	Non-specific lipid-transfer protein OS=Homo sapiens GN=SCP2 PE=1 SV=2	7	7	55	50000000	50000000	11000000	14000000	27000000	39000000	16000000	37000000	24000000	26000000	62000000	74000000	31250000	38125000	1.22	0.615825	0.210542	46500000	29750000	1.488	0.952	0.573375	-0.0709665	8	FALSE	TRUE	TRUE	7	411	1.70316	Tpossible_mito	NLTP|NSL-TP|SCP-2|SCP-CHI|SCP-X|SCPX|P22307	ENSG00000116171
ACOX1	Isoform 2 of Peroxisomal acyl-coenzyme A oxidase 1 OS=Homo sapiens GN=ACOX1	16	16	97	74000000	33000000	25000000	31000000	54000000	29000000	71000000	29000000	40000000	46000000	44000000	24000000	40750000	42125000	1.03374	0.916978	0.0376409	38500000	45750000	0.944785	1.1227	-0.0819416	0.166972	8	FALSE	TRUE	TRUE	4	411	0.973236	Tpossible_mito	ACOX|PALMCOX|SCOX|Q15067	ENSG00000161533
LDHB	L-lactate dehydrogenase B chain OS=Homo sapiens GN=LDHB PE=1 SV=2	11	12	104	69000000	83000000	36000000	31000000	16000000	22000000	22000000	28000000	22000000	19000000	150000000	200000000	54750000	59875000	1.09361	0.861262	0.0648648	97750000	22000000	1.78539	0.401826	0.836238	-1.31536	8	FALSE	TRUE	TRUE	164	411	39.9027	Tpossible_mito	HEL-S-281|LDH-B|LDH-H|LDHBD|TRG-5|P07195	ENSG00000111716
HINT1	Histidine triad nucleotide-binding protein 1 OS=Homo sapiens GN=HINT1 PE=1 SV=2	1	1	2											23000000	33000000	0	28000000				28000000		100	0	6.64386		2	TRUE	FALSE	FALSE	27	411	6.56934	Tnon_mito	HINT|NMAN|PKCI-1|PRKCNH1|P49773	ENSG00000169567
DNAJC3	DnaJ homolog subfamily C member 3 OS=Homo sapiens GN=DNAJC3 PE=1 SV=1	4	4	9	14000000	11000000			32000000	26000000			24000000	21000000			12500000	25750000	2.06	0.00892741	2.04927	22500000	29000000	1.8	2.32	0.847997	1.21412	4	TRUE	TRUE	TRUE	1	411	0.243309	Tnon_mito	ERdj6|HP58|P58|P58IPK|PRKRI|Q13217	ENSG00000102580
TUBB6	Tubulin beta-6 chain (Fragment) OS=Homo sapiens GN=TUBB6 PE=4 SV=1	1	1	1													0	0						0	0			0	TRUE	FALSE	FALSE	317	411	77.129	Tnon_mito	HsT1601|TUBB-5|Q9BUF5	ENSG00000176014
DHRS7	Dehydrogenase/reductase SDR family member 7 OS=Homo sapiens GN=DHRS7 PE=1 SV=1	5	5	31	35000000	21000000	10000000	12000000	21000000	18000000	39000000	19000000	18000000	25000000	18000000	20000000	19500000	22250000	1.14103	0.680612	0.1671	20250000	24250000	1.03846	1.24359	0.0544478	0.314511	8	FALSE	TRUE	TRUE	3	411	0.729927	Tnon_mito	SDR34C1|retDSR4|retSDR4|Q9Y394	ENSG00000100612
ADSL	Adenylosuccinate lyase OS=Homo sapiens GN=ADSL PE=2 SV=1	1	1	4		7300000	4800000								10000000	11000000	6050000	10500000	1.73554	0.137757	0.860888	10500000		1.73554	0	0.795382		2	FALSE	FALSE	FALSE	31	411	7.54258	Tpossible_mito	AMPS|ASASE|ASL|P30566	ENSG00000239900
NME1	Isoform 2 of Nucleoside diphosphate kinase A OS=Homo sapiens GN=NME1	1	6	82	85000000	110000000	33000000	38000000	43000000	49000000	42000000	62000000	46000000	51000000	150000000	140000000	66500000	72875000	1.09586	0.801975	0.0958394	96750000	49000000	1.45489	0.736842	0.540907	-0.440573	8	FALSE	TRUE	TRUE	123	411	29.927	Tpossible_mito	AWD|GAAD|NB|NBS|NDKA|NDPK-A|NDPKA|NM23|NM23-H1|P15531	ENSG00000239672
GDPD1	Glycerophosphodiester phosphodiesterase domain-containing protein 1 OS=Homo sapiens GN=GDPD1 PE=1 SV=2	1	1	1												7200000	0	7200000				7200000		100	0	6.64386		1	TRUE	FALSE	FALSE	2	411	0.486618	Tnon_mito	GDE4|Q8N9F7	ENSG00000153982
PDIA6	Isoform 2 of Protein disulfide-isomerase A6 OS=Homo sapiens GN=PDIA6	14	14	270	450000000	410000000	110000000	110000000	150000000	110000000	190000000	130000000	160000000	160000000	330000000	220000000	270000000	181250000	0.671296	0.415205	0.381738	217500000	145000000	0.805556	0.537037	-0.311944	-0.896907	8	FALSE	TRUE	TRUE	129	411	31.3869	Tnon_mito	ERP5|P5|TXNDC7|Q15084	ENSG00000143870
DCXR	L-xylulose reductase OS=Homo sapiens GN=DCXR PE=1 SV=2	2	2	2		14000000										12000000	14000000	12000000	0.857143			12000000		0.857143	0	-0.222392		1	TRUE	FALSE	FALSE	15	411	3.64964	Tmito	DCR|HCR2|HCRII|KIDCR|P34H|SDR20C1|XR|Q7Z4W1	ENSG00000169738
PDIA4	Protein disulfide-isomerase A4 OS=Homo sapiens GN=PDIA4 PE=1 SV=2	29	29	385	250000000	290000000	69000000	86000000	69000000	80000000	110000000	130000000	75000000	120000000	280000000	310000000	173750000	146750000	0.844604	0.696304	0.157201	196250000	97250000	1.1295	0.559712	0.17568	-0.837243	8	FALSE	TRUE	TRUE	59	411	14.3552	Tnon_mito	ERP70|ERP72|ERp-72|P13667	ENSG00000155660
RPL18	60S ribosomal protein L18 (Fragment) OS=Homo sapiens GN=RPL18 PE=3 SV=1	6	6	99	460000000	420000000	150000000	230000000	210000000	240000000	230000000	200000000	240000000	330000000	330000000	320000000	315000000	262500000	0.833333	0.538431	0.26887	305000000	220000000	0.968254	0.698413	-0.0465426	-0.517848	8	FALSE	TRUE	TRUE	191	411	46.472	Tnon_mito	L18|Q07020	ENSG00000063177
MRPL48	39S ribosomal protein L48, mitochondrial OS=Homo sapiens GN=MRPL48 PE=1 SV=2	1	1	2													0	0						0	0			0	TRUE	FALSE	FALSE	12	411	2.91971	Tmito	HSPC290|L48MT|MRP-L48|Q96GC5	ENSG00000175581
HSD17B12	Estradiol 17-beta-dehydrogenase 12 OS=Homo sapiens GN=HSD17B12 PE=1 SV=2	11	11	79	61000000	61000000	16000000	28000000	35000000	49000000	44000000	62000000	59000000	60000000	66000000	78000000	41500000	56625000	1.36446	0.290921	0.536225	65750000	47500000	1.58434	1.14458	0.66388	0.194816	8	FALSE	TRUE	TRUE	27	411	6.56934	Tnon_mito	KAR|SDR12C1|Q53GQ0	ENSG00000149084
PECR	Peroxisomal trans-2-enoyl-CoA reductase OS=Homo sapiens GN=PECR PE=1 SV=2	1	1	1								7600000					0	7600000					7600000	0	100		6.64386	1	TRUE	FALSE	FALSE	0	411	0	Tpossible_mito	DCRRP|HPDHASE|HSA250303|PVIARL|SDR29C1|TERP|Q9BY49	ENSG00000115425
CYB5R3	Isoform 3 of NADH-cytochrome b5 reductase 3 OS=Homo sapiens GN=CYB5R3	6	6	30	42000000	26000000	24000000	18000000	24000000	48000000	26000000	29000000	26000000	21000000	59000000	39000000	27500000	34000000	1.23636	0.380142	0.420054	36250000	31750000	1.31818	1.15455	0.398549	0.207325	8	FALSE	TRUE	TRUE	25	411	6.08273	Tmito	B5R|DIA1|P00387	ENSG00000100243
GGH	Gamma-glutamyl hydrolase OS=Homo sapiens GN=GGH PE=1 SV=2	1	1	3										2800000	5600000	6300000	0	4900000				4900000		100	0	6.64386		3	TRUE	FALSE	FALSE	6	411	1.45985	Tnon_mito	GH|Q92820	ENSG00000137563
PNKD	Isoform 2 of Probable hydrolase PNKD OS=Homo sapiens GN=PNKD	1	1	1	5500000												5500000	0	0					0	0			0	TRUE	FALSE	FALSE	10	411	2.43309	Tpossible_mito	BRP17|DYT8|FPD1|KIPP1184|MR-1|MR1|PDC|PKND1|TAHCCP2|Q8N490	ENSG00000127838
QARS	Glutamine--tRNA ligase OS=Homo sapiens GN=QARS PE=1 SV=1	10	10	28	21000000	21000000	8400000		4400000	8500000	9200000	10000000	8600000	9600000	14000000	19000000	16800000	10412500	0.619792	0.26315	0.579796	12800000	8025000	0.761905	0.477679	-0.392317	-1.06589	8	FALSE	TRUE	TRUE	94	411	22.871	Tpossible_mito	GLNRS|PRO2195|P47897	ENSG00000172053
RPS9	40S ribosomal protein S9 OS=Homo sapiens GN=RPS9 PE=1 SV=3	11	11	107	280000000	370000000	310000000	300000000	48000000	120000000	120000000	130000000	150000000	150000000	210000000	200000000	315000000	141000000	0.447619	0.000183315	3.7368	177500000	104500000	0.563492	0.331746	-0.827533	-1.59185	8	TRUE	TRUE	TRUE	170	411	41.3625	Tnon_mito	S9|P46781	ENSG00000170889
CSNK2A1	Casein kinase II subunit alpha OS=Homo sapiens GN=CSNK2A1 PE=1 SV=1	5	5	16	37000000	4200000	20000000	19000000			7600000				33000000	4300000	20050000	1.49667e+07	0.746467	0.67557	0.17033	18650000	7600000	0.930175	0.379052	-0.104427	-1.39953	3	FALSE	TRUE	TRUE	64	411	15.5718	Tnon_mito	CK2A1|CKII|CSNK2A3|P68400	ENSG00000101266
PSMB7	Proteasome subunit beta type-7 OS=Homo sapiens GN=PSMB7 PE=1 SV=1	2	2	2	20000000			2500000									11250000	0	0					0	0			0	TRUE	FALSE	FALSE	63	411	15.3285	Tnon_mito	Z|Q99436	ENSG00000136930
DNAJB12	DnaJ (Hsp40) homolog, subfamily B, member 12, isoform CRA_c OS=Homo sapiens GN=DNAJB12 PE=4 SV=1	3	3	7					4500000	6300000		7500000	6000000	10000000			0	6860000	100	0.00172148	2.7641	8000000	6100000	100	100	6.64386	6.64386	5	TRUE	TRUE	TRUE	7	411	1.70316	Tnon_mito	DJ10|Q9NXW2	ENSG00000148719
EPRS	Bifunctional glutamate/proline--tRNA ligase OS=Homo sapiens GN=EPRS PE=1 SV=5	26	26	115	38000000	41000000	13000000	11000000	16000000	14000000	19000000	15000000	21000000	20000000	41000000	35000000	25750000	22625000	0.878641	0.737069	0.132492	29250000	16000000	1.13592	0.621359	0.183864	-0.686501	8	FALSE	TRUE	TRUE	157	411	38.1995	Tnon_mito	EARS|GLUPRORS|PARS|QARS|QPRS|P07814	ENSG00000136628
TUBB4A	Tubulin beta-4A chain OS=Homo sapiens GN=TUBB4A PE=1 SV=2	2	21	406											8100000	24000000	0	16050000				16050000		100	0	6.64386		2	TRUE	TRUE	TRUE	366	411	89.0511	Tnon_mito	DYT4|TUBB4|TUBB5|beta-5|P04350	ENSG00000104833
EEF1A2	Elongation factor 1-alpha 2 OS=Homo sapiens GN=EEF1A2 PE=1 SV=1	3	11	330	100000000	52000000	11000000	21000000	24000000	16000000	35000000	20000000	20000000	25000000	51000000	29000000	46000000	27500000	0.597826	0.426672	0.369906	31250000	23750000	0.679348	0.516304	-0.557778	-0.953706	8	FALSE	TRUE	TRUE	343	411	83.455	Tnon_mito	EEF1AL|EF-1-alpha-2|EF1A|HS1|STN|STNL|Q05639	ENSG00000101210
EDF1	Endothelial differentiation-related factor 1 OS=Homo sapiens GN=EDF1 PE=1 SV=1	2	2	43	69000000	84000000	51000000	61000000	36000000	46000000	38000000	45000000	41000000	53000000	73000000	96000000	66250000	53500000	0.807547	0.240399	0.619068	65750000	41250000	0.992453	0.622642	-0.0109296	-0.683526	8	FALSE	FALSE	TRUE	80	411	19.4647	Tnon_mito	EDF-1|MBF1|O60869	ENSG00000107223
PKM	Pyruvate kinase PKM OS=Homo sapiens GN=PKM PE=1 SV=4	23	23	199	120000000	89000000	54000000	78000000	37000000	39000000	38000000	36000000	42000000	51000000	290000000	160000000	85250000	86625000	1.01613	0.96986	0.0132911	135750000	37500000	1.59238	0.439883	0.67118	-1.18481	8	FALSE	TRUE	TRUE	249	411	60.5839	Tpossible_mito	CTHBP|HEL-S-30|OIP3|PK3|PKM2|TCB|THBP1|P14618	ENSG00000067225
MCFD2	Multiple coagulation factor deficiency protein 2 OS=Homo sapiens GN=MCFD2 PE=1 SV=1	2	2	6		21000000	8600000				16000000				65000000	29000000	14800000	3.66667e+07	2.47748	0.275396	0.560043	47000000	16000000	3.17568	1.08108	1.66706	0.112475	3	FALSE	FALSE	TRUE	1	411	0.243309	Tnon_mito	F5F8D|F5F8D2|LMAN1IP|SDNSF|Q8NI22	ENSG00000180398
HSP90B1	Endoplasmin OS=Homo sapiens GN=HSP90B1 PE=1 SV=1	39	41	587	440000000	410000000	180000000	170000000	170000000	160000000	240000000	190000000	210000000	250000000	380000000	320000000	300000000	240000000	0.8	0.48257	0.31644	290000000	190000000	0.966667	0.633333	-0.0489096	-0.658963	8	FALSE	TRUE	TRUE	186	411	45.2555	Tnon_mito	ECGP|GP96|GRP94|HEL-S-125m|HEL35|TRA1|P14625	ENSG00000166598
VCP	Transitional endoplasmic reticulum ATPase OS=Homo sapiens GN=VCP PE=1 SV=4	31	31	354	280000000	140000000	83000000	110000000	100000000	71000000	140000000	64000000	63000000	68000000	210000000	93000000	153250000	101125000	0.659869	0.332424	0.478308	108500000	93750000	0.707993	0.611746	-0.498192	-0.708996	8	FALSE	TRUE	TRUE	167	411	40.6326	Tnon_mito	ALS14|HEL-220|HEL-S-70|IBMPFD|IBMPFD1|TERA|p97|P55072	ENSG00000165280
MYCBP	C-Myc-binding protein OS=Homo sapiens GN=MYCBP PE=1 SV=3	8	8	223	1800000000	1100000000	1000000000	1100000000	680000000	650000000	750000000	510000000	380000000	510000000	960000000	490000000	1250000000	616250000	0.493	0.0347864	1.45859	585000000	647500000	0.468	0.518	-1.09542	-0.948976	8	TRUE	TRUE	TRUE	72	411	17.5182	Tpossible_mito	AMY-1|Q99417	ENSG00000214114
ERP44	Endoplasmic reticulum resident protein 44 OS=Homo sapiens GN=ERP44 PE=1 SV=1	3	3	16	120000000		10000000		51000000	17000000	47000000	26000000	33000000	27000000		35000000	65000000	3.37143e+07	0.518681	0.670649	0.173505	3.16667e+07	35250000	0.487179	0.542308	-1.03747	-0.882816	7	FALSE	TRUE	TRUE	11	411	2.6764	Tnon_mito	PDIA10|TXNDC4|Q9BS26	ENSG00000023318
DNAH2	Dynein heavy chain 2, axonemal OS=Homo sapiens GN=DNAH2 PE=2 SV=3	2	2	3		98000000		40000000									69000000	0	0					0	0			0	TRUE	FALSE	FALSE	4	411	0.973236	Tnon_mito	DNAHC2|DNHD3|Q9P225	ENSG00000183914
HARS	Histidine--tRNA ligase, cytoplasmic OS=Homo sapiens GN=HARS PE=1 SV=2	4	4	12	37000000	17000000			26000000		40000000		7000000		18000000	22000000	27000000	22600000	0.837037	0.743052	0.128981	1.56667e+07	33000000	0.580247	1.22222	-0.785261	0.289507	5	FALSE	TRUE	TRUE	34	411	8.27251	Tnon_mito	HRS|USH3B|P12081	ENSG00000170445
NSF	Vesicle-fusing ATPase OS=Homo sapiens GN=NSF PE=1 SV=3	17	17	82	33000000	44000000	21000000	25000000	26000000	33000000	30000000	35000000	30000000	40000000	41000000	40000000	30750000	34375000	1.11789	0.542362	0.265711	37750000	31000000	1.22764	1.00813	0.29589	0.0116818	8	FALSE	TRUE	TRUE	31	411	7.54258	Tnon_mito	SKD2|P46459	ENSG00000073969
FOXRED1	FAD-dependent oxidoreductase domain-containing protein 1 OS=Homo sapiens GN=FOXRED1 PE=1 SV=2	2	2	11		5800000	4700000	4600000		5100000	3400000	4500000	3400000	5300000	4600000	4200000	5.03333e+06	4.35714e+06	0.865658	0.224489	0.648804	4375000	4.33333e+06	0.869205	0.860927	-0.202231	-0.216037	7	FALSE	FALSE	TRUE	1	411	0.243309	Tmito	H17|Q96CU9	ENSG00000110074
DCAF5	DDB1- and CUL4-associated factor 5 OS=Homo sapiens GN=DCAF5 PE=1 SV=2	1	1	1				17000000									17000000	0	0					0	0			0	TRUE	FALSE	FALSE	1	411	0.243309	Tpossible_mito	BCRG2|BCRP2|D14S1461E|WDR22|Q96JK2	ENSG00000139990
CBS	Isoform 2 of Cystathionine beta-synthase OS=Homo sapiens GN=CBS	1	1	2			4500000										4500000	0	0					0	0			0	TRUE	FALSE	FALSE	25	411	6.08273	Tnon_mito	HIP4|P0DN79	ENSG00000160200
DDX1	ATP-dependent RNA helicase DDX1 OS=Homo sapiens GN=DDX1 PE=1 SV=2	30	30	324	320000000	110000000	75000000	91000000	280000000	140000000	320000000	77000000	130000000	130000000	240000000	82000000	149000000	174875000	1.17366	0.711462	0.147849	145500000	204250000	0.97651	1.37081	-0.0342932	0.455024	8	FALSE	TRUE	TRUE	125	411	30.4136	Tnon_mito	DBP-RB|UKVH5d|Q92499	ENSG00000079785
SNRNP200	U5 small nuclear ribonucleoprotein 200 kDa helicase OS=Homo sapiens GN=SNRNP200 PE=1 SV=2	28	28	79	780000000	43000000	17000000	19000000					7200000	7200000	28000000	20000000	214750000	15600000	0.0726426	0.368363	0.433724	15600000		0.0726426	0	-3.78304		4	FALSE	TRUE	TRUE	146	411	35.5231	Tnon_mito	ASCC3L1|BRR2|HELIC2|RP33|U5-200KD|O75643	ENSG00000144028
VPS29	Vacuolar protein sorting-associated protein 29 OS=Homo sapiens GN=VPS29 PE=2 SV=1	2	2	5				6000000						8900000	13000000	15000000	6000000	12300000	2.05			12300000		2.05	0	1.03562		3	TRUE	FALSE	TRUE	11	411	2.6764	Tnon_mito	DC15|PEP11|Q9UBQ0	ENSG00000111237
DNM2	Dynamin-2 OS=Homo sapiens GN=DNM2 PE=2 SV=1	3	3	6	34000000						16000000				17000000	9100000	34000000	1.40333e+07	0.412745			13050000	16000000	0.383824	0.470588	-1.38148	-1.08746	3	TRUE	TRUE	TRUE	40	411	9.73236	Tnon_mito	CMT2M|CMTDI1|CMTDIB|DI-CMTB|DYN2|DYNII|LCCS5|P50570	ENSG00000079805
AGPS	Alkyldihydroxyacetonephosphate synthase, peroxisomal OS=Homo sapiens GN=AGPS PE=1 SV=1	11	11	47	43000000	30000000	15000000	12000000	25000000	12000000	9800000	11000000	13000000	16000000	30000000	22000000	25000000	17350000	0.694	0.375821	0.425018	20250000	14450000	0.81	0.578	-0.304006	-0.790859	8	FALSE	TRUE	TRUE	11	411	2.6764	Tpossible_mito	ADAP-S|ADAS|ADHAPS|ADPS|ALDHPSY|O00116	ENSG00000018510
PPT2	Isoform 3 of Lysosomal thioesterase PPT2 OS=Homo sapiens GN=PPT2	1	1	5	26000000			29000000		50000000	49000000				42000000		27500000	47000000	1.70909	0.00741477	2.1299	42000000	49500000	1.52727	1.8	0.610958	0.847997	3	TRUE	FALSE	TRUE	0	411	0	Tnon_mito	C6orf8|G14|PPT-2|Q9UMR5	ENSG00000168452
PDLIM5	PDZ and LIM domain protein 5 OS=Homo sapiens GN=PDLIM5 PE=1 SV=5	1	1	3		6700000				2600000						10000000	6700000	6300000	0.940299			10000000	2600000	1.49254	0.38806	0.577767	-1.36565	2	TRUE	FALSE	FALSE	27	411	6.56934	Tnon_mito	ENH|ENH1|LIM|Q96HC4	ENSG00000163110
SGTA	Small glutamine-rich tetratricopeptide repeat-containing protein alpha OS=Homo sapiens GN=SGTA PE=1 SV=1	6	6	25			14000000	17000000	12000000	13000000	13000000	14000000	10000000	12000000	34000000	40000000	15500000	18500000	1.19355	0.511151	0.291451	24000000	13000000	1.54839	0.83871	0.630766	-0.253757	8	FALSE	TRUE	TRUE	19	411	4.62287	Tnon_mito	SGT|alphaSGT|hSGT|O43765	ENSG00000104969
SLC25A6	ADP/ATP translocase 3 OS=Homo sapiens GN=SLC25A6 PE=1 SV=4	2	8	35		32000000	7700000										19850000	0	0					0	0			0	TRUE	TRUE	TRUE	201	411	48.9051	Tmito	2|3|AAC3|ANT|ANT 2|ANT 3|ANT3|ANT3Y|P12236	ENSG00000169100
CCT2	T-complex protein 1 subunit beta OS=Homo sapiens GN=CCT2 PE=1 SV=4	29	29	403	220000000	130000000	120000000	140000000	210000000	150000000	230000000	120000000	220000000	190000000	180000000	160000000	152500000	182500000	1.19672	0.307204	0.512573	187500000	177500000	1.22951	1.16393	0.298081	0.21901	8	FALSE	TRUE	TRUE	180	411	43.7956	Tnon_mito	99D8.1|CCT-beta|CCTB|HEL-S-100n|PRO1633|TCP-1-beta|P78371	ENSG00000166226
RPS3	40S ribosomal protein S3 OS=Homo sapiens GN=RPS3 PE=1 SV=2	5	16	343	230000000	290000000	220000000	270000000	110000000	160000000	98000000	100000000	110000000	170000000	130000000	150000000	252500000	128500000	0.508911	0.00109324	2.96129	140000000	117000000	0.554455	0.463366	-0.850857	-1.10977	8	TRUE	TRUE	TRUE	266	411	64.7202	Tnon_mito	S3|P23396	ENSG00000149273
RPS3	40S ribosomal protein S3 (Fragment) OS=Homo sapiens GN=RPS3 PE=3 SV=1	1	12	274		38000000	41000000		12000000	18000000		14000000	17000000	25000000	13000000	14000000	39500000	1.61429e+07	0.40868	0.000468595	3.3292	17250000	1.46667e+07	0.436709	0.371308	-1.19526	-1.42931	7	TRUE	TRUE	TRUE	266	411	64.7202	Tnon_mito	S3|P23396	ENSG00000149273
DNAJC21	Isoform 2 of DnaJ homolog subfamily C member 21 OS=Homo sapiens GN=DNAJC21	1	1	1		6600000											6600000	0	0					0	0			0	TRUE	FALSE	FALSE	4	411	0.973236	Tnon_mito	DNAJA5|GS3|JJJ1|Q5F1R6	ENSG00000168724
PRKRA	Interferon-inducible double-stranded RNA-dependent protein kinase activator A OS=Homo sapiens GN=PRKRA PE=1 SV=1	4	4	13	35000000	25000000	9700000			450000000	9900000	11000000	9800000	260000000	15000000	16000000	2.32333e+07	1.10243e+08	4.74503	0.240175	0.619473	75200000	1.56967e+08	3.23673	6.7561	1.69454	2.75619	7	FALSE	TRUE	TRUE	23	411	5.59611	Tnon_mito	DYT16|PACT|RAX|O75569	ENSG00000180228
SLC27A4	Long-chain fatty acid transport protein 4 OS=Homo sapiens GN=SLC27A4 PE=1 SV=1	1	1	1					6800000								0	6800000					6800000	0	100		6.64386	1	TRUE	FALSE	FALSE	2	411	0.486618	Tnon_mito	ACSVL4|FATP4|IPS|Q6P1M0	ENSG00000167114
NSDHL	Sterol-4-alpha-carboxylate 3-dehydrogenase, decarboxylating OS=Homo sapiens GN=NSDHL PE=1 SV=2	2	2	15	15000000	10000000	12000000	15000000		18000000			16000000	26000000	20000000	16000000	13000000	19200000	1.47692	0.0286874	1.54231	19500000	18000000	1.5	1.38462	0.584963	0.469485	5	TRUE	FALSE	TRUE	10	411	2.43309	Tnon_mito	H105E3|SDR31E1|XAP104|Q15738	ENSG00000147383
FKBP2	Peptidyl-prolyl cis-trans isomerase FKBP2 OS=Homo sapiens GN=FKBP2 PE=1 SV=2	3	3	12		29000000						18000000	11000000	14000000	33000000	35000000	29000000	22200000	0.765517			23250000	18000000	0.801724	0.62069	-0.318822	-0.688056	5	TRUE	TRUE	TRUE	4	411	0.973236	Tnon_mito	FKBP-13|PPIase|P26885	ENSG00000173486
PRDX2	Peroxiredoxin-2 OS=Homo sapiens GN=PRDX2 PE=1 SV=5	7	8	50	67000000	33000000	20000000	26000000	25000000		62000000	16000000			120000000	34000000	36500000	51400000	1.40822	0.514575	0.288551	77000000	3.43333e+07	2.10959	0.940639	1.07696	-0.0882865	5	FALSE	TRUE	TRUE	205	411	49.8783	Tmito	HEL-S-2a|NKEF-B|NKEFB|PRP|PRX2|PRXII|PTX1|TDPX1|TPX1|TSA|P32119	ENSG00000167815
TXN	Thioredoxin OS=Homo sapiens GN=TXN PE=1 SV=3	3	3	22	32000000	46000000	83000000	150000000	27000000	45000000	18000000	62000000	19000000	67000000	130000000	53000000	77750000	52625000	0.676849	0.435401	0.36111	67250000	38000000	0.864952	0.488746	-0.209308	-1.03284	8	FALSE	TRUE	TRUE	174	411	42.3358	Tpossible_mito	TRDX|TRX|TRX1|P10599	ENSG00000136810
CCT3	T-complex protein 1 subunit gamma OS=Homo sapiens GN=CCT3 PE=1 SV=4	24	24	331	190000000	160000000	140000000	170000000	110000000	150000000	150000000	130000000	190000000	200000000	180000000	170000000	165000000	160000000	0.969697	0.747436	0.126426	185000000	135000000	1.12121	0.818182	0.165059	-0.289507	8	FALSE	TRUE	TRUE	165	411	40.146	Tnon_mito	CCT-gamma|CCTG|PIG48|TCP-1-gamma|TRIC5|P49368	ENSG00000163468
AHCY	Adenosylhomocysteinase OS=Homo sapiens GN=AHCY PE=1 SV=4	4	4	11	19000000	23000000		11000000					6800000	9600000	26000000	47000000	1.76667e+07	22350000	1.26509	0.661756	0.179302	22350000		1.26509	0	0.339245		4	FALSE	TRUE	TRUE	98	411	23.8443	Tnon_mito	SAHH|adoHcyase|P23526	ENSG00000101444
SUGT1	Suppressor of G2 allele of SKP1 homolog OS=Homo sapiens GN=SUGT1 PE=1 SV=3	2	2	7	66000000	11000000	5000000								12000000	13000000	2.73333e+07	12500000	0.457317	0.524638	0.28014	12500000		0.457317	0	-1.12873		2	FALSE	FALSE	TRUE	39	411	9.48905	Tnon_mito	SGT1|Q9Y2Z0	ENSG00000165416
GNPAT	Dihydroxyacetone phosphate acyltransferase OS=Homo sapiens GN=GNPAT PE=1 SV=1	3	3	5					15000000		26000000		6000000		23000000		0	17500000	100	0.0298216	1.52547	14500000	20500000	100	100	6.64386	6.64386	4	TRUE	TRUE	TRUE	5	411	1.21655	Tpossible_mito	DAP-AT|DAPAT|DHAPAT|O15228	ENSG00000116906
PRMT1	Isoform 4 of Protein arginine N-methyltransferase 1 OS=Homo sapiens GN=PRMT1	14	14	107	68000000	78000000	68000000	87000000	18000000	26000000	23000000	31000000	30000000	36000000	44000000	51000000	75250000	32375000	0.430233	0.000156154	3.80645	40250000	24500000	0.534884	0.325581	-0.902703	-1.61891	8	TRUE	TRUE	TRUE	123	411	29.927	Tnon_mito	ANM1|HCP1|HRMT1L2|IR1B4|Q99873	ENSG00000126457
RAB21	Ras-related protein Rab-21 OS=Homo sapiens GN=RAB21 PE=1 SV=3	2	2	6							19000000		17000000	22000000	19000000	5500000		16500000		0.00450099	2.34669	15875000	19000000	100	100	6.64386	6.64386	5	TRUE	FALSE	TRUE	27	411	6.56934	Tnon_mito	Q9UL25	ENSG00000080371
PSMC6	26S protease regulatory subunit 10B OS=Homo sapiens GN=PSMC6 PE=1 SV=1	9	9	46	31000000	31000000	24000000	39000000	22000000	16000000	14000000	14000000	9500000	14000000	51000000	18000000	31250000	19812500	0.634	0.0665779	1.17667	23125000	16500000	0.74	0.528	-0.434403	-0.92139	8	FALSE	TRUE	TRUE	89	411	21.6545	Tnon_mito	CADP44|HEL-S-73|P44|SUG2|p42|P62333	ENSG00000100519
PSMB1	Proteasome subunit beta type-1 OS=Homo sapiens GN=PSMB1 PE=1 SV=2	1	1	3			18000000	22000000							33000000		20000000	33000000	1.65			33000000		1.65	0	0.722466		1	TRUE	FALSE	FALSE	76	411	18.4915	Tnon_mito	HC5|PMSB1|PSC5|P20618	ENSG00000008018
ASAH1	Isoform 2 of Acid ceramidase OS=Homo sapiens GN=ASAH1	2	2	2					12000000					12000000			0	12000000				12000000	12000000	100	100	6.64386	6.64386	2	TRUE	FALSE	FALSE	6	411	1.45985	Tnon_mito	AC|ACDase|ASAH|PHP|PHP32|SMAPME|Q13510	ENSG00000104763
PPT1	Palmitoyl-protein thioesterase 1 OS=Homo sapiens GN=PPT1 PE=1 SV=1	5	5	29	53000000	60000000	22000000	24000000	53000000	36000000	48000000	51000000	29000000	59000000	47000000	55000000	39750000	47250000	1.18868	0.51285	0.290009	47500000	47000000	1.19497	1.18239	0.256973	0.241706	8	FALSE	TRUE	TRUE	5	411	1.21655	Tnon_mito	CLN1|INCL|PPT|P50897	ENSG00000131238
FAM213A	Redox-regulatory protein FAM213A OS=Homo sapiens GN=FAM213A PE=1 SV=3	5	5	33	27000000	20000000	22000000	21000000	58000000	26000000	44000000	23000000	30000000	37000000	57000000	20000000	22500000	36875000	1.63889	0.0300184	1.52261	36000000	37750000	1.6	1.67778	0.678072	0.746552	8	TRUE	TRUE	TRUE	2	411	0.486618	Tmito	C10orf58|PAMM|Q9BRX8	ENSG00000122378
RPL8	60S ribosomal protein L8 OS=Homo sapiens GN=RPL8 PE=1 SV=2	6	6	102	570000000	470000000	160000000	200000000	190000000	160000000	230000000	110000000	160000000	180000000	460000000	300000000	350000000	223750000	0.639286	0.307981	0.511476	275000000	172500000	0.785714	0.492857	-0.347923	-1.02076	8	FALSE	TRUE	TRUE	157	411	38.1995	Tnon_mito	L8|P62917	ENSG00000161016
CCDC19	Coiled-coil domain-containing protein 19, mitochondrial OS=Homo sapiens GN=CCDC19 PE=2 SV=2	1	1	1						1200000							0	1200000					1200000	0	100		6.64386	1	TRUE	FALSE	FALSE	0	411	0	Tpossible_mito	NESG1|Q9UL16	ENSG00000213085
UACA	Uveal autoantigen with coiled-coil domains and ankyrin repeats OS=Homo sapiens GN=UACA PE=1 SV=2	1	1	1				19000000000									19000000000	0	0					0	0			0	TRUE	FALSE	FALSE	6	411	1.45985	Tpossible_mito	NUCLING|Q9BZF9	ENSG00000137831
RPS15	40S ribosomal protein S15 OS=Homo sapiens GN=RPS15 PE=3 SV=1	4	4	115	370000000	150000000	100000000	96000000	89000000	70000000	150000000	74000000	64000000	87000000	320000000	110000000	179000000	120500000	0.673184	0.455703	0.341318	145250000	95750000	0.811453	0.534916	-0.301421	-0.902615	8	FALSE	TRUE	TRUE	126	411	30.6569	Tnon_mito	RIG|S15|P62841	ENSG00000115268
RPS15A	40S ribosomal protein S15a OS=Homo sapiens GN=RPS15A PE=1 SV=2	3	7	107	200000000	230000000	140000000	140000000		28000000	120000000	81000000	81000000	39000000	110000000	150000000	177500000	87000000	0.490141	0.0168188	1.77421	95000000	7.63333e+07	0.535211	0.430047	-0.90182	-1.21743	7	TRUE	TRUE	TRUE	178	411	43.309	Tmito	S15a|P62244	ENSG00000134419
CRYZ	Quinone oxidoreductase OS=Homo sapiens GN=CRYZ PE=1 SV=1	1	1	1									4000000				0	4000000				4000000		100	0	6.64386		1	TRUE	FALSE	FALSE	20	411	4.86618	Tmito	Q08257	ENSG00000116791
PYCR1	Isoform 3 of Pyrroline-5-carboxylate reductase 1, mitochondrial OS=Homo sapiens GN=PYCR1	3	4	56	44000000	46000000	11000000	15000000	26000000	22000000	21000000	24000000	25000000	30000000	36000000	40000000	29000000	28000000	0.965517	0.922793	0.0348958	32750000	23250000	1.12931	0.801724	0.175442	-0.318822	8	FALSE	TRUE	TRUE	17	411	4.13625	Tmito	ARCL2B|ARCL3B|P5C|P5CR|PIG45|PP222|PRO3|PYCR|P32322	ENSG00000183010
PPA1	Inorganic pyrophosphatase OS=Homo sapiens GN=PPA1 PE=1 SV=2	5	5	12	30000000	27000000		15000000							32000000	41000000	24000000	36500000	1.52083	0.156991	0.804126	36500000		1.52083	0	0.604862		2	FALSE	TRUE	TRUE	73	411	17.7616	Tnon_mito	HEL-S-66p|IOPPP|PP|PP1|SID6-8061|Q15181	ENSG00000180817
KRT5	SWISS-PROT:P13647 Tax_Id=9606 Gene_Symbol=KRT5 Keratin, type II cytoskeletal 5	20	33	415	110000000	120000000	91000000	120000000	68000000	86000000	120000000	120000000	120000000	150000000	160000000	160000000	110250000	123000000	1.11565	0.374089	0.427025	147500000	98500000	1.33787	0.893424	0.419936	-0.162583	8	FALSE	TRUE	TRUE	282	411	68.6131	Tmito	CK5|DDD|DDD1|EBS2|K5|KRT5A|P13647	ENSG00000186081
TUBB4B	Tubulin beta-4B chain OS=Homo sapiens GN=TUBB4B PE=1 SV=1	1	24	509	85000000	81000000	59000000	71000000	50000000	48000000	36000000	34000000	40000000	48000000	130000000	140000000	74000000	65750000	0.888514	0.626219	0.203274	89500000	42000000	1.20946	0.567568	0.274362	-0.817136	8	FALSE	TRUE	TRUE	376	411	91.4842	Tnon_mito	Beta2|TUBB2|TUBB2C|P68371	ENSG00000188229
RPL10A	60S ribosomal protein L10a OS=Homo sapiens GN=RPL10A PE=1 SV=2	9	9	101	330000000	380000000	140000000	190000000	130000000	170000000	140000000	170000000	150000000	200000000	250000000	270000000	260000000	185000000	0.711538	0.282747	0.548602	217500000	152500000	0.836538	0.586538	-0.257496	-0.769702	8	FALSE	TRUE	TRUE	117	411	28.4672	Tmito	Csa-19|L10A|NEDD6|P62906	ENSG00000198755
RPL9	60S ribosomal protein L9 OS=Homo sapiens GN=RPL9 PE=1 SV=1	9	9	159	310000000	210000000	39000000	71000000	100000000	83000000	130000000	96000000	97000000	130000000	200000000	140000000	157500000	122000000	0.774603	0.616509	0.21006	141750000	102250000	0.9	0.649206	-0.152003	-0.623251	8	FALSE	TRUE	TRUE	167	411	40.6326	Tnon_mito	L9|NPC-A-16|P32969	ENSG00000163682
RPL23A	60S ribosomal protein L23a OS=Homo sapiens GN=RPL23A PE=3 SV=1	9	9	151	430000000	540000000	230000000	290000000	140000000	180000000	170000000	220000000	200000000	220000000	300000000	350000000	372500000	222500000	0.597315	0.11698	0.931889	267500000	177500000	0.718121	0.47651	-0.477702	-1.06942	8	FALSE	TRUE	TRUE	224	411	54.5012	Tnon_mito	L23A|MDA20|P62750	ENSG00000198242
EIF5B	Eukaryotic translation initiation factor 5B OS=Homo sapiens GN=EIF5B PE=1 SV=4	25	25	141	150000000	100000000	57000000	56000000	47000000	37000000	57000000	37000000	61000000	48000000	100000000	240000000	90750000	78375000	0.863636	0.715147	0.145605	112250000	44500000	1.23691	0.490358	0.306746	-1.02809	8	FALSE	TRUE	TRUE	86	411	20.9246	Tnon_mito	IF2|O60841	ENSG00000158417
SEC63	Translocation protein SEC63 homolog OS=Homo sapiens GN=SEC63 PE=1 SV=2	3	3	5	16000000				6300000					5900000	35000000		16000000	1.57333e+07	0.983333			20450000	6300000	1.27812	0.39375	0.354029	-1.34465	3	TRUE	TRUE	TRUE	11	411	2.6764	Tnon_mito	DNAJC23|ERdj2|PRO2507|SEC63L|Q9UGP8	ENSG00000025796
TUBB	Tubulin beta chain OS=Homo sapiens GN=TUBB PE=1 SV=2	4	24	596	170000000	130000000	180000000	250000000	82000000	71000000	100000000	84000000	73000000	90000000	500000000	210000000	182500000	151250000	0.828767	0.602386	0.220125	218250000	84250000	1.19589	0.461644	0.258085	-1.11515	8	FALSE	TRUE	TRUE	382	411	92.944	Tnon_mito	M40|OK/SW-cl.56|TUBB1|TUBB5|P07437	ENSG00000183311
HAX1	Isoform 2 of HCLS1-associated protein X-1 OS=Homo sapiens GN=HAX1	2	2	3		24000000							6900000			11000000	24000000	8950000	0.372917			8950000		0.372917	0	-1.42307		2	TRUE	FALSE	FALSE	29	411	7.05596	Tpossible_mito	HCLSBP1|HS1BP1|SCN3|O00165	ENSG00000143575
PSMB5	Proteasome subunit beta type-5 OS=Homo sapiens GN=PSMB5 PE=1 SV=3	5	5	40	20000000	27000000	18000000	23000000	9200000	11000000	11000000	13000000	14000000	15000000	28000000	32000000	22000000	16650000	0.756818	0.166954	0.777402	22250000	11050000	1.01136	0.502273	0.0163018	-0.993457	8	FALSE	TRUE	TRUE	92	411	22.3844	Tnon_mito	LMPX|MB1|X|P28074	ENSG00000100804
RPS14	40S ribosomal protein S14 OS=Homo sapiens GN=RPS14 PE=1 SV=3	9	9	262	1100000000	1300000000	760000000	910000000	580000000	700000000	670000000	770000000	580000000	710000000	740000000	820000000	1017500000	696250000	0.684275	0.0669584	1.17419	712500000	680000000	0.700246	0.668305	-0.514067	-0.581422	8	FALSE	TRUE	TRUE	259	411	63.017	Tmito	EMTB|S14|P62263	ENSG00000164587
RPL23	60S ribosomal protein L23 OS=Homo sapiens GN=RPL23 PE=1 SV=1	5	5	156	480000000	290000000	160000000	180000000	160000000	140000000	220000000	190000000	180000000	250000000	350000000	210000000	277500000	212500000	0.765766	0.450108	0.346683	247500000	177500000	0.891892	0.63964	-0.165059	-0.644669	8	FALSE	TRUE	TRUE	243	411	59.1241	Tpossible_mito	L23|rpL17|P62829	ENSG00000125691
ABCF1	ATP-binding cassette sub-family F member 1 OS=Homo sapiens GN=ABCF1 PE=1 SV=2	15	15	99	54000000	62000000	36000000	49000000	13000000	18000000	20000000	22000000	16000000	26000000	58000000	39000000	50250000	26500000	0.527363	0.0137297	1.86234	34750000	18250000	0.691542	0.363184	-0.532111	-1.46123	8	TRUE	TRUE	TRUE	87	411	21.1679	Tnon_mito	ABC27|ABC50|Q8NE71	ENSG00000204574
DARS	Aspartate--tRNA ligase, cytoplasmic OS=Homo sapiens GN=DARS PE=1 SV=2	10	10	65	40000000	48000000	13000000	15000000	13000000	15000000	20000000	22000000	20000000	27000000	42000000	40000000	29000000	24875000	0.857759	0.689204	0.161652	32250000	17500000	1.11207	0.603448	0.153246	-0.728698	8	FALSE	TRUE	TRUE	121	411	29.4404	Tnon_mito	HBSL|P14868	ENSG00000115866
IARS	Isoleucine--tRNA ligase, cytoplasmic OS=Homo sapiens GN=IARS PE=1 SV=2	10	10	22	32000000	23000000	9800000	9700000	22000000		16000000				29000000	16000000	18625000	20750000	1.11409	0.748762	0.125656	22500000	19000000	1.20805	1.02013	0.272685	0.028759	4	FALSE	TRUE	TRUE	106	411	25.7908	Tnon_mito	IARS1|ILERS|ILRS|IRS|PRO0785|P41252	ENSG00000196305
PSMB2	Proteasome subunit beta type-2 OS=Homo sapiens GN=PSMB2 PE=1 SV=1	5	5	12	8600000		6900000	8000000							11000000	15000000	7.83333e+06	13000000	1.65957	0.218638	0.660275	13000000		1.65957	0	0.730813		2	FALSE	TRUE	TRUE	72	411	17.5182	Tnon_mito	HC7-I|P49721	ENSG00000126067
RPL5	60S ribosomal protein L5 OS=Homo sapiens GN=RPL5 PE=1 SV=3	9	9	165	180000000	220000000	92000000	110000000	57000000	75000000	70000000	100000000	83000000	59000000	150000000	160000000	150500000	94250000	0.626246	0.158211	0.800764	113000000	75500000	0.750831	0.501661	-0.413441	-0.995215	8	FALSE	TRUE	TRUE	156	411	37.9562	Tnon_mito	DBA6|L5|P46777	ENSG00000122406
CHP1	Calcineurin B homologous protein 1 OS=Homo sapiens GN=CHP1 PE=1 SV=3	3	3	10	18000000		1900000	2100000		23000000		17000000	10000000	22000000	11000000	12000000	7.33333e+06	1.58333e+07	2.15909	0.246632	0.60795	13750000	20000000	1.875	2.72727	0.906891	1.44746	6	FALSE	TRUE	TRUE	3	411	0.729927	Tnon_mito	CHP|SLC9A1BP|Sid470p|p22|p24|Q99653	ENSG00000187446
COA7	Cytochrome c oxidase assembly factor 7 OS=Homo sapiens GN=COA7 PE=1 SV=2	1	1	12	23000000	20000000			7700000		11000000	11000000		7700000	23000000	21000000	21500000	1.35667e+07	0.631008	0.0454709	1.34227	1.72333e+07	9900000	0.80155	0.460465	-0.319135	-1.11884	6	TRUE	FALSE	TRUE				Tmito	C1orf163|RESA1|SELRC1|Q96BR5	ENSG00000162377
RAB18	Ras-related protein Rab-18 OS=Homo sapiens GN=RAB18 PE=1 SV=1	4	4	18	26000000	22000000			13000000	14000000	14000000	14000000	12000000	17000000	15000000	15000000	24000000	14250000	0.59375	0.109856	0.959175	14750000	13750000	0.614583	0.572917	-0.702319	-0.803603	8	FALSE	TRUE	TRUE	12	411	2.91971	Tnon_mito	RAB18LI1|WARBM3|Q9NP72	ENSG00000099246
NME1-NME2	Nucleoside diphosphate kinase OS=Homo sapiens GN=NME1-NME2 PE=2 SV=1	2	7	65				23000000							120000000	71000000	23000000	95500000	4.15217			95500000		4.15217	0	2.05387		2	TRUE	TRUE	TRUE	93	411	22.6277	Tpossible_mito	NM23-LV|NMELV	ENSG00000011052
XRCC6	X-ray repair cross-complementing protein 6 OS=Homo sapiens GN=XRCC6 PE=1 SV=2	19	19	152	120000000	99000000	42000000	43000000	51000000	52000000	59000000	47000000	54000000	69000000	130000000	110000000	76000000	71500000	0.940789	0.850508	0.0703217	90750000	52250000	1.19408	0.6875	0.255898	-0.540568	8	FALSE	TRUE	TRUE	176	411	42.8224	Tnon_mito	CTC75|CTCBF|G22P1|KU70|ML8|TLAA|P12956	ENSG00000196419
LPCAT1	Lysophosphatidylcholine acyltransferase 1 OS=Homo sapiens GN=LPCAT1 PE=1 SV=2	3	3	15	16000000	9800000	3300000	2100000				5200000	16000000	7000000	12000000	6800000	7800000	9400000	1.20513	0.689708	0.161335	10450000	5200000	1.33974	0.666667	0.421957	-0.584963	5	FALSE	TRUE	TRUE	7	411	1.70316	Tnon_mito	AYTL2|PFAAP3|lpcat|Q8NF37	ENSG00000153395
TMX3	Protein disulfide-isomerase TMX3 OS=Homo sapiens GN=TMX3 PE=1 SV=2	1	1	2	3100000										2000000		3100000	2000000	0.645161			2000000		0.645161	0	-0.632268		1	TRUE	FALSE	FALSE	3	411	0.729927	Tnon_mito	PDIA13|TXNDC10|Q96JJ7	ENSG00000166479
EEF1A1	Elongation factor 1-alpha 1 OS=Homo sapiens GN=EEF1A1 PE=1 SV=1	9	17	683	1900000000	1200000000	550000000	710000000	1000000000	520000000	1200000000	500000000	590000000	590000000	2700000000	1100000000	1090000000	1025000000	0.940367	0.874935	0.058024	1245000000	805000000	1.1422	0.738532	0.191818	-0.437267	8	FALSE	TRUE	TRUE	350	411	85.1582	Tnon_mito	CCS-3|CCS3|EE1A1|EEF-1|EEF1A|EF-Tu|EF1A|GRAF-1EF|HNGC:16303|LENG7|PTI1|eEF1A-1|P68104	ENSG00000156508
RAB1B	Ras-related protein Rab-1B OS=Homo sapiens GN=RAB1B PE=1 SV=1	3	9	237	37000000	31000000	9600000	11000000	15000000	22000000	19000000	16000000	20000000	24000000	27000000	28000000	22150000	21375000	0.965011	0.919936	0.0362425	24750000	18000000	1.11738	0.812641	0.160122	-0.29931	8	FALSE	TRUE	TRUE	69	411	16.7883	Tpossible_mito	Q9H0U4	ENSG00000174903
CTSD	Cathepsin D OS=Homo sapiens GN=CTSD PE=1 SV=1	9	9	51	31000000	30000000	24000000	14000000	14000000	38000000	41000000	42000000	35000000	26000000	42000000	33000000	24750000	33875000	1.36869	0.119581	0.922339	34000000	33750000	1.37374	1.36364	0.458106	0.447459	8	FALSE	TRUE	TRUE	39	411	9.48905	Tpossible_mito	CLN10|CPSD|HEL-S-130P|P07339	ENSG00000117984
LIG3	DNA ligase 3 OS=Homo sapiens GN=LIG3 PE=1 SV=2	2	2	3	3100000						4700000					7200000	3100000	5950000	1.91935			7200000	4700000	2.32258	1.51613	1.21573	0.600393	2	TRUE	FALSE	FALSE	20	411	4.86618	Tpossible_mito	LIG2|P49916	ENSG00000005156
LRBA	Lipopolysaccharide-responsive and beige-like anchor protein OS=Homo sapiens GN=LRBA PE=1 SV=4	1	1	1											5200000		0	5200000				5200000		100	0	6.64386		1	TRUE	FALSE	FALSE	20	411	4.86618	Tnon_mito	BGL|CDC4L|CVID8|LAB300|LBA|P50851	ENSG00000198589
SLIT2	Slit homolog 2 protein OS=Homo sapiens GN=SLIT2 PE=1 SV=1	4	4	4	17000000		9900000										13450000	0	0					0	0			0	TRUE	TRUE	FALSE	3	411	0.729927	Tnon_mito	SLIL3|Slit-2|O94813	ENSG00000145147
TUBG1	Tubulin gamma-1 chain OS=Homo sapiens GN=TUBG1 PE=1 SV=2	6	6	13	21000000	22000000	12000000	12000000				9800000	11000000	20000000	14000000	22000000	16750000	15360000	0.917015	0.716541	0.144759	16750000	9800000	1	0.585075	0	-0.773307	5	FALSE	TRUE	TRUE	47	411	11.4355	Tnon_mito	CDCBM4|GCP-1|TUBG|TUBGCP1|P23258	ENSG00000131462
RPL11	60S ribosomal protein L11 OS=Homo sapiens GN=RPL11 PE=1 SV=2	5	5	96	290000000	300000000	130000000	140000000	76000000	92000000	130000000	120000000	130000000	140000000	210000000	200000000	215000000	137250000	0.638372	0.192752	0.715	170000000	104500000	0.790698	0.486047	-0.338802	-1.04083	8	FALSE	TRUE	TRUE	209	411	50.8516	Tnon_mito	DBA7|GIG34|L11|P62913	ENSG00000142676
DPM1	Dolichol-phosphate mannosyltransferase subunit 1 (Fragment) OS=Homo sapiens GN=DPM1 PE=4 SV=1	2	2	5		27000000						15000000		18000000	20000000	16000000	27000000	17250000	0.638889			18000000	15000000	0.666667	0.555556	-0.584963	-0.847997	4	TRUE	FALSE	TRUE	28	411	6.81265	Tnon_mito	CDGIE|MPDS|O60762	ENSG00000000419
NPLOC4	Isoform 2 of Nuclear protein localization protein 4 homolog OS=Homo sapiens GN=NPLOC4	1	1	3		7300000									6200000	6000000	7300000	6100000	0.835616			6100000		0.835616	0	-0.259087		2	TRUE	FALSE	FALSE	24	411	5.83942	Tnon_mito	NPL4|Q8TAT6	ENSG00000182446
FASTKD5	FAST kinase domain-containing protein 5 OS=Homo sapiens GN=FASTKD5 PE=1 SV=1	1	1	3					14000000		24000000				18000000		0	1.86667e+07				18000000	19000000	100	100	6.64386	6.64386	3	TRUE	FALSE	FALSE	7	411	1.70316	Tmito	dJ1187M17.5|Q7L8L6	ENSG00000215251
PARK7	Protein DJ-1 OS=Homo sapiens GN=PARK7 PE=1 SV=2	4	4	19	67000000	81000000		21000000	15000000		23000000	20000000		18000000	79000000	71000000	5.63333e+07	3.76667e+07	0.668639	0.440009	0.356539	56000000	1.93333e+07	0.994083	0.343195	-0.00856201	-1.5429	6	FALSE	TRUE	TRUE	58	411	14.1119	Tmito	DJ-1|DJ1|HEL-S-67p|Q99497	ENSG00000116288
RARS	Arginine--tRNA ligase, cytoplasmic OS=Homo sapiens GN=RARS PE=1 SV=2	11	11	35	36000000	25000000		3200000		8100000	12000000	10000000	6600000	12000000	34000000	25000000	21400000	1.53857e+07	0.718959	0.607518	0.216441	19400000	1.00333e+07	0.906542	0.468847	-0.141554	-1.09281	7	FALSE	TRUE	TRUE	110	411	26.764	Tmito	ArgRS|DALRD1|P54136	ENSG00000113643
TXNL1	Thioredoxin-like protein 1 OS=Homo sapiens GN=TXNL1 PE=1 SV=3	2	2	3											12000000	11000000	0	11500000				11500000		100	0	6.64386		2	TRUE	FALSE	FALSE	48	411	11.6788	Tnon_mito	HEL-S-114|TRP32|TXL-1|TXNL|Txl|O43396	ENSG00000091164
FKBP4	Peptidyl-prolyl cis-trans isomerase FKBP4 OS=Homo sapiens GN=FKBP4 PE=1 SV=3	10	10	26	18000000	24000000	11000000	14000000							38000000	40000000	16750000	39000000	2.32836	0.00250129	2.60184	39000000		2.32836	0	1.21931		2	TRUE	TRUE	TRUE	95	411	23.1144	Tpossible_mito	FKBP51|FKBP52|FKBP59|HBI|Hsp56|PPIase|p52|Q02790	ENSG00000004478
BSG	Basigin OS=Homo sapiens GN=BSG PE=1 SV=2	3	3	12	19000000	23000000				13000000	16000000	20000000	13000000	15000000	18000000	21000000	21000000	1.65714e+07	0.789116	0.210535	0.676676	16750000	1.63333e+07	0.797619	0.777778	-0.326228	-0.36257	7	FALSE	TRUE	TRUE	40	411	9.73236	Tpossible_mito	5F7|CD147|EMMPRIN|M6|OK|TCSF|P35613	ENSG00000172270
RFC1	Replication factor C subunit 1 OS=Homo sapiens GN=RFC1 PE=1 SV=4	4	4	4	9200000	12000000		3800000									8.33333e+06	0	0					0	0			0	TRUE	TRUE	FALSE	50	411	12.1655	Tnon_mito	A1|MHCBFB|PO-GA|RECC1|RFC|RFC140|P35251	ENSG00000035928
OGT	UDP-N-acetylglucosamine--peptide N-acetylglucosaminyltransferase 110 kDa subunit OS=Homo sapiens GN=OGT PE=1 SV=3	9	9	25	18000000	16000000	16000000	14000000	5100000	8100000		6200000	6700000		17000000	12000000	16000000	9.18333e+06	0.573958	0.0124799	1.90379	11900000	6.46667e+06	0.74375	0.404167	-0.42711	-1.30698	6	TRUE	TRUE	TRUE	55	411	13.382	Tpossible_mito	HRNT1|O-GLCNAC|O15294	ENSG00000147162
CEP170	Centrosomal protein of 170 kDa OS=Homo sapiens GN=CEP170 PE=1 SV=1	4	4	26	11000000	16000000	7500000	7500000	4100000	6300000	4700000		4800000	6000000	11000000	8700000	10500000	6.51429e+06	0.620408	0.141152	0.850314	7625000	5.03333e+06	0.72619	0.479365	-0.46158	-1.0608	7	FALSE	TRUE	TRUE	46	411	11.1922	Tnon_mito	FAM68A|KAB|KIAA0470|Q5SW79	ENSG00000143702
UQCC2	Ubiquinol-cytochrome-c reductase complex assembly factor 2 OS=Homo sapiens GN=UQCC2 PE=1 SV=1	3	3	10	38000000	16000000	13000000		18000000	9800000	30000000			14000000	11000000		2.23333e+07	16560000	0.741493	0.555471	0.255338	12500000	1.92667e+07	0.559701	0.862687	-0.83727	-0.213092	5	FALSE	TRUE	TRUE	0	411	0	Tmito	C6orf125|Cbp6|M19|MNF1|bA6B20.2|Q9BRT2	ENSG00000137288
TRABD	TraB domain-containing protein OS=Homo sapiens GN=TRABD PE=2 SV=1	1	1	2								13000000	8100000				0	10550000				8100000	13000000	100	100	6.64386	6.64386	2	TRUE	FALSE	FALSE	4	411	0.973236	Tnon_mito	LP6054|PP2447|Q9H4I3	ENSG00000170638
DHX30	Isoform 2 of Putative ATP-dependent RNA helicase DHX30 OS=Homo sapiens GN=DHX30	6	6	9	19000000	25000000	7000000	8700000									14925000	0	0					0	0			0	TRUE	TRUE	TRUE	62	411	15.0852	Tmito	DDX30|RETCOR|Q7L2E3	ENSG00000132153
BZW2	Basic leucine zipper and W2 domain-containing protein 2 OS=Homo sapiens GN=BZW2 PE=1 SV=1	2	4	25	22000000			7100000	17000000	14000000	25000000		11000000	15000000	28000000	12000000	14550000	1.74286e+07	1.19784	0.766904	0.115259	16500000	1.86667e+07	1.13402	1.28293	0.181447	0.359445	7	FALSE	TRUE	TRUE	15	411	3.64964	Tnon_mito	MST017|MSTP017|Q9Y6E2	ENSG00000136261
METTL15	Probable methyltransferase-like protein 15 OS=Homo sapiens GN=METTL15 PE=2 SV=1	1	1	10	5700000	6900000		1700000	4200000		4800000	4300000	5000000	3900000	4400000	4900000	4.76667e+06	4500000	0.944056	0.881202	0.0549246	4550000	4.43333e+06	0.954545	0.93007	-0.0671142	-0.104589	7	FALSE	FALSE	TRUE	1	411	0.243309	Tmito	METT5D1|A6NJ78	ENSG00000169519
CCRN4L	Nocturnin OS=Homo sapiens GN=CCRN4L PE=2 SV=2	13	13	293					350000000	290000000	390000000	310000000	320000000	410000000	200000000	230000000	0	312500000	100	5.79896e-06	5.23665	290000000	335000000	100	100	6.64386	6.64386	8	TRUE	TRUE	TRUE	0	411	0	Tnon_mito	CCR4L|NOC|Q9UK39	ENSG00000151014
FDFT1	Squalene synthase OS=Homo sapiens GN=FDFT1 PE=1 SV=1	7	7	58	22000000	22000000	14000000	14000000	20000000	28000000	23000000	28000000	29000000	42000000	29000000	34000000	18000000	29125000	1.61806	0.00892736	2.04928	33500000	24750000	1.86111	1.375	0.896164	0.459432	8	TRUE	TRUE	TRUE	9	411	2.18978	Tnon_mito	DGPT|ERG9|SQS|SS|P37268	ENSG00000079459
GART	Trifunctional purine biosynthetic protein adenosine-3 OS=Homo sapiens GN=GART PE=1 SV=1	2	2	4			2600000	5300000							7500000	6800000	3950000	7150000	1.81013	0.237451	0.624425	7150000		1.81013	0	0.856091		2	FALSE	FALSE	FALSE	104	411	25.3041	Tnon_mito	AIRS|GARS|GARTF|PAIS|PGFT|PRGS|P22102	ENSG00000159131
ANKFY1	Isoform 4 of Ankyrin repeat and FYVE domain-containing protein 1 OS=Homo sapiens GN=ANKFY1	12	12	36	67000000	28000000	28000000	29000000	17000000		20000000				31000000	20000000	38000000	22000000	0.578947	0.197739	0.703908	25500000	18500000	0.671053	0.486842	-0.575502	-1.03847	4	FALSE	TRUE	TRUE	60	411	14.5985	Tnon_mito	ANKHZN|BTBD23|ZFYVE14|Q9P2R3	ENSG00000185722
ANP32B	Acidic leucine-rich nuclear phosphoprotein 32 family member B OS=Homo sapiens GN=ANP32B PE=1 SV=1	1	2	14		13000000											13000000	0	0					0	0			0	TRUE	FALSE	TRUE	30	411	7.29927	Tnon_mito	APRIL|PHAPI2|SSP29|Q92688	ENSG00000136938
EIF2B4	Translation initiation factor eIF-2B subunit delta OS=Homo sapiens GN=EIF2B4 PE=2 SV=1	1	1	5	13000000		4600000	4800000							13000000	13000000	7.46667e+06	13000000	1.74107	0.183563	0.736216	13000000		1.74107	0	0.799975		2	FALSE	FALSE	TRUE	22	411	5.3528	Tnon_mito	EIF-2B|EIF2B|EIF2Bdelta|Q9UI10	ENSG00000115211
NT5DC2	Isoform 2 of 5'-nucleotidase domain-containing protein 2 OS=Homo sapiens GN=NT5DC2	3	3	4									6500000	5500000			0	6000000				6000000		100	0	6.64386		2	TRUE	TRUE	FALSE	28	411	6.81265	Tmito	Q9H857	ENSG00000168268
DNAJA2	DnaJ homolog subfamily A member 2 OS=Homo sapiens GN=DNAJA2 PE=1 SV=1	6	6	35	27000000	27000000	13000000	14000000	9100000	14000000	9600000	5500000	12000000	13000000	24000000	26000000	20250000	14150000	0.698765	0.241293	0.617455	18750000	9550000	0.925926	0.471605	-0.111031	-1.08435	8	FALSE	TRUE	TRUE	90	411	21.8978	Tnon_mito	CPR3|DJ3|DJA2|DNAJ|DNJ3|HIRIP4|PRO3015|RDJ2|O60884	ENSG00000069345
CAD	CAD protein OS=Homo sapiens GN=CAD PE=1 SV=3	5	5	14	19000000	11000000	12000000	12000000								12000000	13500000	12000000	0.888889			12000000		0.888889	0	-0.169925		1	TRUE	TRUE	TRUE	147	411	35.7664	Tnon_mito	P27708	ENSG00000084774
TOP2B	DNA topoisomerase 2-beta OS=Homo sapiens GN=TOP2B PE=1 SV=3	1	1	1										340000000			0	340000000				340000000		100	0	6.64386		1	TRUE	FALSE	FALSE	61	411	14.8418	Tnon_mito	TOPIIB|top2beta|Q02880	ENSG00000077097
VARS	Valine--tRNA ligase OS=Homo sapiens GN=VARS PE=1 SV=4	16	16	77	44000000	56000000	17000000	23000000	18000000	19000000	15000000	21000000	15000000	21000000	26000000	34000000	35000000	21125000	0.603571	0.224906	0.648	24000000	18250000	0.685714	0.521429	-0.544321	-0.939458	8	FALSE	TRUE	TRUE	100	411	24.3309	Tpossible_mito	G7A|VARS1|VARS2|P26640	ENSG00000096171
DDX46	Probable ATP-dependent RNA helicase DDX46 OS=Homo sapiens GN=DDX46 PE=1 SV=2	9	9	22	28000000	34000000		6900000			12000000		14000000	19000000	16000000	20000000	2.29667e+07	16200000	0.70537	0.498306	0.302504	17250000	12000000	0.751089	0.522496	-0.412945	-0.936507	5	FALSE	TRUE	TRUE	125	411	30.4136	Tnon_mito	PRPF5|Prp5|Q7L014	ENSG00000145833
DDX41	Probable ATP-dependent RNA helicase DDX41 (Fragment) OS=Homo sapiens GN=DDX41 PE=2 SV=1	5	5	13	35000000			10000000	13000000	6800000	15000000		11000000		7900000		22500000	10740000	0.477333	0.518089	0.285596	9450000	11600000	0.42	0.515556	-1.25154	-0.9558	5	FALSE	TRUE	TRUE	60	411	14.5985	Tnon_mito	ABS|Q9UJV9	ENSG00000183258
PSMA7	Proteasome subunit alpha type-7 OS=Homo sapiens GN=PSMA7 PE=1 SV=1	10	10	47	40000000	34000000	46000000	58000000		19000000	8500000	14000000	16000000	20000000	46000000	46000000	44500000	2.42143e+07	0.544141	0.0288697	1.53956	32000000	1.38333e+07	0.719101	0.310861	-0.475733	-1.68566	7	TRUE	TRUE	TRUE	89	411	21.6545	Tnon_mito	C6|HSPC|RC6-1|XAPC7|O14818	ENSG00000101182
PPIH	Peptidyl-prolyl cis-trans isomerase H OS=Homo sapiens GN=PPIH PE=1 SV=1	2	2	22	23000000	25000000	16000000	18000000	13000000	19000000	15000000	18000000	12000000	17000000	24000000	25000000	20500000	17875000	0.871951	0.361849	0.441472	19500000	16250000	0.95122	0.792683	-0.0721498	-0.335184	8	FALSE	FALSE	TRUE	15	411	3.64964	Tnon_mito	CYP-20|CYPH|SnuCyp-20|USA-CYP|O43447	ENSG00000171960
PRKACA	cAMP-dependent protein kinase catalytic subunit alpha OS=Homo sapiens GN=PRKACA PE=1 SV=2	3	3	7	19000000	11000000	6000000								20000000	10000000	12000000	15000000	1.25	0.677109	0.169341	15000000		1.25	0	0.321928		2	FALSE	TRUE	TRUE	11	411	2.6764	Tpossible_mito	PKACA|P17612	ENSG00000072062
CKB	Creatine kinase B-type OS=Homo sapiens GN=CKB PE=1 SV=1	12	12	60	58000000	59000000	32000000	39000000	42000000	63000000	32000000	23000000	11000000	72000000	160000000	120000000	47000000	65375000	1.39096	0.368119	0.434012	90750000	40000000	1.93085	0.851064	0.949237	-0.232661	8	FALSE	TRUE	TRUE	163	411	39.6594	Tpossible_mito	B-CK|BCK|CKBB|HEL-211|HEL-S-29|P12277	ENSG00000166165
DYNLL2	Dynein light chain 2, cytoplasmic OS=Homo sapiens GN=DYNLL2 PE=1 SV=1	1	4	47										8300000			0	8300000				8300000		100	0	6.64386		1	TRUE	TRUE	TRUE	38	411	9.24574	Tnon_mito	DNCL1B|Dlc2|RSPH22|Q96FJ2	ENSG00000264364
DHX29	ATP-dependent RNA helicase DHX29 OS=Homo sapiens GN=DHX29 PE=1 SV=2	1	1	1		9200000											9200000	0	0					0	0			0	TRUE	FALSE	FALSE	36	411	8.75912	Tpossible_mito	DDX29|Q7Z478	ENSG00000067248
FEN1	Flap endonuclease 1 OS=Homo sapiens GN=FEN1 PE=1 SV=1	5	5	57	36000000	46000000	25000000	31000000	44000000	33000000	49000000	33000000	40000000	44000000	67000000	43000000	34500000	44125000	1.27899	0.142173	0.847183	48500000	39750000	1.4058	1.15217	0.491388	0.204358	8	FALSE	TRUE	TRUE	98	411	23.8443	Tpossible_mito	FEN-1|MF1|RAD2|P39748	ENSG00000168496
ATP6V1A	V-type proton ATPase catalytic subunit A OS=Homo sapiens GN=ATP6V1A PE=1 SV=2	3	3	5	29000000						26000000				27000000	18000000	29000000	2.36667e+07	0.816092			22500000	26000000	0.775862	0.896552	-0.366128	-0.157541	3	TRUE	TRUE	TRUE	62	411	15.0852	Tpossible_mito	ATP6A1|ATP6V1A1|HO68|VA68|VPP2|Vma1|P38606	ENSG00000114573
ATP6V1B2	V-type proton ATPase subunit B, brain isoform OS=Homo sapiens GN=ATP6V1B2 PE=1 SV=3	2	2	10	11000000	18000000		7000000		10000000		6500000		11000000	10000000	21000000	12000000	11700000	0.975	0.944156	0.0249561	14000000	8250000	1.16667	0.6875	0.222392	-0.540568	5	FALSE	FALSE	TRUE	40	411	9.73236	Tnon_mito	ATP6B1B2|ATP6B2|HO57|VATB|VPP3|Vma2|P21281	ENSG00000147416
EEF2	Elongation factor 2 OS=Homo sapiens GN=EEF2 PE=1 SV=4	34	34	267	140000000	130000000	58000000	58000000	50000000	57000000	40000000	42000000	50000000	58000000	230000000	210000000	96500000	92125000	0.954663	0.905382	0.0431683	137000000	47250000	1.41969	0.489637	0.505575	-1.03021	8	FALSE	TRUE	TRUE	207	411	50.365	Tnon_mito	EEF-2|EF-2|EF2|SCA26|P13639	ENSG00000167658
RPS5	40S ribosomal protein S5 OS=Homo sapiens GN=RPS5 PE=1 SV=4	11	11	194	410000000	470000000	210000000	310000000	220000000	190000000	180000000	180000000	210000000	220000000	380000000	270000000	350000000	231250000	0.660714	0.12617	0.899044	270000000	192500000	0.771429	0.55	-0.374396	-0.862496	8	FALSE	TRUE	TRUE	160	411	38.9294	Tnon_mito	S5|P46782	ENSG00000083845
B2M	Beta-2-microglobulin form pI 5.3 OS=Homo sapiens GN=B2M PE=4 SV=1	1	1	5	28000000	7000000			48000000		40000000				80000000		17500000	56000000	3.2	0.100024	0.999894	80000000	44000000	4.57143	2.51429	2.19265	1.33015	3	FALSE	FALSE	TRUE	5	411	1.21655	Tnon_mito	P61769	ENSG00000166710
HEXA	Beta-hexosaminidase OS=Homo sapiens GN=HEXA PE=2 SV=1	1	1	1		5700000											5700000	0	0					0	0			0	TRUE	FALSE	FALSE	0	411	0	Tnon_mito	TSD|P06865	ENSG00000213614
ALDH1A2	Retinal dehydrogenase 2 OS=Homo sapiens GN=ALDH1A2 PE=1 SV=3	1	2	2												5300000	0	5300000				5300000		100	0	6.64386		1	TRUE	FALSE	FALSE	30	411	7.29927	Tnon_mito	RALDH(II)|RALDH2|RALDH2-T|O94788	ENSG00000128918
FKBP3	Peptidyl-prolyl cis-trans isomerase FKBP3 OS=Homo sapiens GN=FKBP3 PE=1 SV=1	8	8	45	62000000	48000000	17000000	13000000	14000000	16000000	23000000	28000000	23000000	25000000	58000000	66000000	35000000	31625000	0.903571	0.815815	0.0884081	43000000	20250000	1.22857	0.578571	0.296982	-0.789433	8	FALSE	TRUE	TRUE	44	411	10.7056	Tnon_mito	FKBP-25|FKBP-3|FKBP25|PPIase|Q00688	ENSG00000100442
CYFIP1	Cytoplasmic FMR1-interacting protein 1 OS=Homo sapiens GN=CYFIP1 PE=1 SV=1	1	2	9	7600000	7500000			2700000				3800000				7550000	3250000	0.430464	0.0788497	1.1032	3800000	2700000	0.503311	0.357616	-0.990477	-1.48352	2	FALSE	FALSE	TRUE	46	411	11.1922	Tnon_mito	P140SRA-1|SHYC|SRA-1|SRA1|Q7L576	ENSG00000068793
SND1	Staphylococcal nuclease domain-containing protein 1 OS=Homo sapiens GN=SND1 PE=1 SV=1	29	29	233	270000000	78000000	44000000	50000000	58000000	37000000	94000000	40000000	38000000	40000000	140000000	160000000	110500000	75875000	0.686652	0.575945	0.239619	94500000	57250000	0.855204	0.5181	-0.22566	-0.948699	8	FALSE	TRUE	TRUE	118	411	28.7105	Tmito	TDRD11|p100|Q7KZF4	ENSG00000197157
GTPBP4	Nucleolar GTP-binding protein 1 OS=Homo sapiens GN=GTPBP4 PE=1 SV=3	3	3	8	9800000	13000000	5600000								10000000	11000000	9.46667e+06	10500000	1.10915	0.680905	0.166913	10500000		1.10915	0	0.149461		2	FALSE	TRUE	TRUE	56	411	13.6253	Tnon_mito	CRFG|NGB|NOG1|Q9BZE4	ENSG00000107937
ARF4	ADP-ribosylation factor 4 OS=Homo sapiens GN=ARF4 PE=1 SV=3	2	5	13		35000000					15000000				37000000	30000000	35000000	2.73333e+07	0.780952			33500000	15000000	0.957143	0.428571	-0.0631938	-1.22239	3	TRUE	TRUE	TRUE	67	411	16.3017	Tnon_mito	ARF2|P18085	ENSG00000168374
PDCD6	Programmed cell death protein 6 OS=Homo sapiens GN=PDCD6 PE=1 SV=1	2	2	4			9900000	10000000									9950000	0	0					0	0			0	TRUE	FALSE	FALSE	27	411	6.56934	Tnon_mito	ALG-2|PEF1B|O75340	ENSG00000249915
WDR61	WD repeat-containing protein 61 OS=Homo sapiens GN=WDR61 PE=1 SV=1	7	7	30	43000000	33000000	22000000	22000000		12000000	36000000	22000000	20000000	20000000	35000000	24000000	30000000	2.41429e+07	0.804762	0.370265	0.431487	24750000	2.33333e+07	0.825	0.777778	-0.277534	-0.36257	7	FALSE	TRUE	TRUE	48	411	11.6788	Tnon_mito	REC14|SKI8|Q9GZS3	ENSG00000140395
NPEPPS	Puromycin-sensitive aminopeptidase OS=Homo sapiens GN=NPEPPS PE=1 SV=2	1	1	2											7500000	9300000	0	8400000				8400000		100	0	6.64386		2	TRUE	FALSE	FALSE	34	411	8.27251	Tnon_mito	AAP-S|MP100|PSA|P55786	ENSG00000141279
RPL13A	60S ribosomal protein L13a (Fragment) OS=Homo sapiens GN=RPL13A PE=4 SV=2	6	6	108	180000000	190000000	93000000	120000000	75000000	140000000	83000000	140000000	100000000	140000000	130000000	170000000	145750000	122250000	0.838765	0.41367	0.383346	135000000	109500000	0.926244	0.751286	-0.110536	-0.412565	8	FALSE	TRUE	TRUE	144	411	35.0365	Tnon_mito	L13A|TSTA1|P40429	ENSG00000142541
TUBA1C	Tubulin alpha-1C chain OS=Homo sapiens GN=TUBA1C PE=2 SV=1	1	17	292	26000000										32000000		26000000	32000000	1.23077			32000000		1.23077	0	0.29956		1	TRUE	TRUE	TRUE	389	411	94.6472	Tnon_mito	TUBA6|bcm948|Q9BQE3	ENSG00000167553
EFTUD2	116 kDa U5 small nuclear ribonucleoprotein component OS=Homo sapiens GN=EFTUD2 PE=1 SV=1	13	13	38	26000000	25000000	21000000	21000000	12000000	9400000			10000000	7700000	10000000	17000000	23250000	1.10167e+07	0.473835	0.000231739	3.635	11175000	10700000	0.480645	0.460215	-1.05696	-1.11962	6	TRUE	TRUE	TRUE	162	411	39.4161	Tnon_mito	MFDGA|MFDM|SNRNP116|Snrp116|Snu114|U5-116KD|Q15029	ENSG00000108883
ERLIN1	Erlin-1 OS=Homo sapiens GN=ERLIN1 PE=1 SV=1	1	3	14												9500000	0	9500000				9500000		100	0	6.64386		1	TRUE	TRUE	TRUE	29	411	7.05596	Tnon_mito	C10orf69|Erlin-1|KE04|KEO4|SPFH1|O75477	ENSG00000107566
LAMTOR2	Ragulator complex protein LAMTOR2 OS=Homo sapiens GN=LAMTOR2 PE=1 SV=1	1	1	1		3800000											3800000	0	0					0	0			0	TRUE	FALSE	FALSE	0	411	0	Tnon_mito	ENDAP|HSPC003|MAPBPIP|MAPKSP1AP|ROBLD3|Ragulator2|p14|Q9Y2Q5	ENSG00000116586
CDS2	Phosphatidate cytidylyltransferase 2 OS=Homo sapiens GN=CDS2 PE=1 SV=1	1	1	6	9300000				4600000		6600000	6700000		4100000	11000000		9300000	6600000	0.709677			7550000	5.96667e+06	0.811828	0.641577	-0.300754	-0.640306	5	TRUE	FALSE	TRUE	1	411	0.243309	Tpossible_mito	O95674	ENSG00000101290
PRDX4	Peroxiredoxin-4 OS=Homo sapiens GN=PRDX4 PE=1 SV=1	10	11	181	140000000	180000000	110000000	100000000	85000000	92000000	98000000	110000000	170000000	130000000	160000000	150000000	132500000	124375000	0.938679	0.718035	0.143854	152500000	96250000	1.15094	0.726415	0.202817	-0.461134	8	FALSE	TRUE	TRUE	161	411	39.1727	Tmito	AOE37-2|HEL-S-97n|PRX-4|Q13162	ENSG00000123131
CCT7	T-complex protein 1 subunit eta OS=Homo sapiens GN=CCT7 PE=1 SV=2	20	20	301	120000000	140000000	98000000	97000000	91000000	110000000	99000000	110000000	94000000	130000000	150000000	140000000	113750000	115500000	1.01538	0.895848	0.0477657	128500000	102500000	1.12967	0.901099	0.175902	-0.150243	8	FALSE	TRUE	TRUE	172	411	41.8491	Tmito	CCTETA|CCTH|NIP7-1|TCP1ETA|Q99832	ENSG00000135624
CCT4	T-complex protein 1 subunit delta OS=Homo sapiens GN=CCT4 PE=1 SV=4	25	25	328	180000000	160000000	140000000	170000000	220000000	190000000	220000000	150000000	190000000	260000000	260000000	220000000	162500000	213750000	1.31538	0.00828728	2.08159	232500000	195000000	1.43077	1.2	0.516791	0.263034	8	TRUE	TRUE	TRUE	186	411	45.2555	Tnon_mito	CCT-DELTA|Cctd|SRB|P50991	ENSG00000115484
HSPH1	Heat shock protein 105 kDa OS=Homo sapiens GN=HSPH1 PE=1 SV=1	16	18	110	50000000	33000000	9500000000	6400000000	10000000	12000000	12000000	14000000	5700000000	4400000000	9400000000	3100000000	3995750000	2831000000	0.708503	0.682224	0.166073	5650000000	12000000	1.414	0.00300319	0.499785	-8.37929	8	FALSE	TRUE	TRUE	119	411	28.9538	Tnon_mito	HSP105|HSP105A|HSP105B|NY-CO-25|Q92598	ENSG00000120694
CCT5	T-complex protein 1 subunit epsilon OS=Homo sapiens GN=CCT5 PE=1 SV=1	24	24	291	200000000	140000000	120000000	180000000	170000000	130000000	98000000	90000000	170000000	180000000	210000000	150000000	160000000	149750000	0.935937	0.674818	0.170813	177500000	122000000	1.10938	0.7625	0.149747	-0.391191	8	FALSE	TRUE	TRUE	182	411	44.2822	Tnon_mito	CCT-epsilon|CCTE|HEL-S-69|TCP-1-epsilon|P48643	ENSG00000150753
TXNDC5	Thioredoxin domain-containing protein 5 OS=Homo sapiens GN=TXNDC5 PE=1 SV=2	10	10	130	130000000	110000000	47000000	57000000	53000000	70000000	82000000	75000000	62000000	77000000	110000000	120000000	86000000	81125000	0.943314	0.83342	0.0791361	92250000	70000000	1.07267	0.813953	0.101212	-0.296982	8	FALSE	TRUE	TRUE	30	411	7.29927	Tnon_mito	ENDOPDI|ERP46|HCC-2|PDIA15|STRF8|UNQ364|Q8NBS9	ENSG00000239264
STRAP	Serine-threonine kinase receptor-associated protein OS=Homo sapiens GN=STRAP PE=2 SV=1	13	13	104	52000000	76000000	47000000	57000000	32000000	30000000	28000000	46000000	32000000	40000000	53000000	77000000	58000000	42250000	0.728448	0.105693	0.975953	50500000	34000000	0.87069	0.586207	-0.19977	-0.770518	8	FALSE	TRUE	TRUE	93	411	22.6277	Tpossible_mito	MAWD|PT-WD|UNRIP|Q9Y3F4	ENSG00000023734
P4HB	Protein disulfide-isomerase OS=Homo sapiens GN=P4HB PE=1 SV=3	23	23	292	190000000	200000000	54000000	71000000	59000000	100000000	130000000	130000000	92000000	130000000	250000000	230000000	128750000	140125000	1.08835	0.810209	0.0914031	175500000	104750000	1.36311	0.813592	0.446899	-0.297622	8	FALSE	TRUE	TRUE	115	411	27.9805	Tmito	DSI|ERBA2L|GIT|P4Hbeta|PDI|PDIA1|PHDB|PO4DB|PO4HB|PROHB|P07237	ENSG00000185624
PRDX1	Peroxiredoxin-1 OS=Homo sapiens GN=PRDX1 PE=1 SV=1	10	12	120	230000000	290000000	140000000	180000000	81000000	96000000	93000000	130000000	45000000	120000000	380000000	410000000	210000000	169375000	0.806548	0.511603	0.291067	238750000	100000000	1.1369	0.47619	0.185111	-1.07039	8	FALSE	TRUE	TRUE	253	411	61.5572	Tpossible_mito	MSP23|NKEF-A|NKEFA|PAG|PAGA|PAGB|PRX1|PRXI|TDPX2|Q06830	ENSG00000117450
RPS16	40S ribosomal protein S16 OS=Homo sapiens GN=RPS16 PE=1 SV=2	7	7	169	680000000	720000000	480000000	720000000	360000000	430000000	330000000	360000000	350000000	520000000	440000000	470000000	650000000	407500000	0.626923	0.0169644	1.77046	445000000	370000000	0.684615	0.569231	-0.546634	-0.812914	8	TRUE	TRUE	TRUE	211	411	51.3382	Tnon_mito	S16|P62249	ENSG00000105193
DNAJC7	DnaJ homolog subfamily C member 7 OS=Homo sapiens GN=DNAJC7 PE=1 SV=2	5	5	20	20000000	22000000	7700000	9000000	8800000	10000000	7500000	8300000	7000000	8400000	18000000	15000000	14675000	10375000	0.706985	0.338133	0.470912	12100000	8650000	0.824532	0.589438	-0.278353	-0.762588	8	FALSE	TRUE	TRUE	59	411	14.3552	Tnon_mito	DJ11|DJC7|TPR2|TTC2|Q99615	ENSG00000168259
STK25	Serine/threonine-protein kinase 25 (Fragment) OS=Homo sapiens GN=STK25 PE=4 SV=1	2	2	8	30000000	35000000		24000000		32000000		24000000	20000000			28000000	2.96667e+07	26000000	0.876404	0.418303	0.37851	24000000	28000000	0.808989	0.94382	-0.305808	-0.083416	4	FALSE	FALSE	TRUE	17	411	4.13625	Tnon_mito	SOK1|YSK1|O00506	ENSG00000115694
CMBL	Carboxymethylenebutenolidase homolog OS=Homo sapiens GN=CMBL PE=1 SV=1	1	1	1				3900000									3900000	0	0					0	0			0	TRUE	FALSE	FALSE	114	411	27.7372	Tnon_mito	JS-1|Q96DG6	ENSG00000164237
PDIA3	Thioredoxin (Fragment) OS=Homo sapiens GN=PDIA3 PE=2 SV=1	1	6	123	190000000	200000000	52000000	64000000	95000000	110000000	130000000	130000000	110000000	130000000	280000000	280000000	126500000	158125000	1.25	0.534693	0.271896	200000000	116250000	1.58103	0.918972	0.660863	-0.121907	8	FALSE	TRUE	TRUE	104	411	25.3041	Tnon_mito	ER60|ERp57|ERp60|ERp61|GRP57|GRP58|HEL-S-269|HEL-S-93n|HsT17083|P58|PI-PLC|P30101	ENSG00000167004
PDIA3	Protein disulfide-isomerase A3 OS=Homo sapiens GN=PDIA3 PE=1 SV=4	22	27	412	660000000	290000000	72000000	80000000	240000000	120000000	360000000	170000000	200000000	160000000	390000000	320000000	275500000	245000000	0.889292	0.842424	0.0744691	267500000	222500000	0.970962	0.807623	-0.0425134	-0.308247	8	FALSE	TRUE	TRUE	104	411	25.3041	Tnon_mito	ER60|ERp57|ERp60|ERp61|GRP57|GRP58|HEL-S-269|HEL-S-93n|HsT17083|P58|PI-PLC|P30101	ENSG00000167004
HSPA4	Heat shock 70 kDa protein 4 OS=Homo sapiens GN=HSPA4 PE=1 SV=4	23	25	190	58000000	63000000	41000000	44000000	21000000	18000000	34000000	29000000	29000000	32000000	92000000	75000000	51500000	41250000	0.800971	0.371013	0.43061	57000000	25500000	1.1068	0.495146	0.146389	-1.01408	8	FALSE	TRUE	TRUE	133	411	32.3601	Tpossible_mito	APG-2|HEL-S-5a|HS24/P52|HSPH2|RY|hsp70|hsp70RY|P34932	ENSG00000170606
HSPA5	78 kDa glucose-regulated protein OS=Homo sapiens GN=HSPA5 PE=1 SV=2	33	35	1172	1300000000	1300000000	490000000	560000000	300000000	370000000	440000000	470000000	340000000	460000000	700000000	760000000	912500000	480000000	0.526027	0.147458	0.831332	565000000	395000000	0.619178	0.432877	-0.691574	-1.20797	8	FALSE	TRUE	TRUE	360	411	87.5912	Tpossible_mito	BIP|GRP78|HEL-S-89n|MIF2|P11021	ENSG00000044574
HSPA8	Heat shock cognate 71 kDa protein (Fragment) OS=Homo sapiens GN=HSPA8 PE=2 SV=2	1	11	374	200000000	52000000	180000000	260000000	100000000	24000000	92000000	190000000	67000000	13000000	260000000	62000000	173000000	101000000	0.583815	0.223612	0.650504	100500000	101500000	0.580925	0.586705	-0.783577	-0.769292	8	FALSE	TRUE	TRUE	396	411	96.3504	Tnon_mito	HEL-33|HEL-S-72p|HSC54|HSC70|HSC71|HSP71|HSP73|HSPA10|LAP1|NIP71|P11142	ENSG00000109971
HSPA8	Heat shock cognate 71 kDa protein OS=Homo sapiens GN=HSPA8 PE=1 SV=1	16	27	669	280000000	350000000	200000000	250000000	95000000	220000000	110000000	190000000	120000000	160000000	340000000	360000000	270000000	199375000	0.738426	0.172667	0.76279	245000000	153750000	0.907407	0.569444	-0.140178	-0.812373	8	FALSE	TRUE	TRUE	396	411	96.3504	Tnon_mito	HEL-33|HEL-S-72p|HSC54|HSC70|HSC71|HSP71|HSP73|HSPA10|LAP1|NIP71|P11142	ENSG00000109971
HSP90AA1	Isoform 2 of Heat shock protein HSP 90-alpha OS=Homo sapiens GN=HSP90AA1	17	30	500	440000000	240000000	300000000	260000000	110000000	78000000	150000000	86000000	120000000	120000000	460000000	290000000	310000000	176750000	0.570161	0.0718528	1.14356	247500000	106000000	0.798387	0.341935	-0.32484	-1.5482	8	FALSE	TRUE	TRUE	272	411	66.18	Tpossible_mito	EL52|HSP86|HSP89A|HSP90A|HSP90N|HSPC1|HSPCA|HSPCAL1|HSPCAL4|HSPN|Hsp89|Hsp90|LAP2|P07900	ENSG00000080824
HSP90AB1	Heat shock protein HSP 90-beta OS=Homo sapiens GN=HSP90AB1 PE=1 SV=4	17	32	638	330000000	330000000	200000000	250000000	120000000	140000000	160000000	130000000	200000000	140000000	460000000	380000000	277500000	216250000	0.779279	0.299346	0.523826	295000000	137500000	1.06306	0.495495	0.0882272	-1.01306	8	FALSE	TRUE	TRUE	277	411	67.3966	Tpossible_mito	D6S182|HSP84|HSP90B|HSPC2|HSPCB|P08238	ENSG00000096384
LDHA	Isoform 3 of L-lactate dehydrogenase A chain OS=Homo sapiens GN=LDHA	7	8	73	33000000	40000000	20000000	24000000	14000000	13000000	9500000	15000000	16000000	12000000	82000000	90000000	29250000	31437500	1.07479	0.867888	0.0615363	50000000	12875000	1.7094	0.440171	0.773491	-1.18386	8	FALSE	TRUE	TRUE	140	411	34.0633	Tpossible_mito	GSD11|HEL-S-133P|LDH1|LDHM|P00338	ENSG00000134333
RPS11	40S ribosomal protein S11 OS=Homo sapiens GN=RPS11 PE=1 SV=3	9	9	239	1200000000	920000000	440000000	410000000	160000000	250000000	390000000	270000000	270000000	160000000	620000000	310000000	742500000	303750000	0.409091	0.102987	0.987216	340000000	267500000	0.457912	0.360269	-1.12686	-1.47285	8	FALSE	TRUE	TRUE	151	411	36.7397	Tnon_mito	S11|P62280	ENSG00000142534
RPS23	40S ribosomal protein S23 OS=Homo sapiens GN=RPS23 PE=1 SV=3	3	3	70	340000000	370000000	140000000	210000000	170000000	180000000	190000000	160000000	110000000	180000000	310000000	330000000	265000000	203750000	0.768868	0.362437	0.440767	232500000	175000000	0.877358	0.660377	-0.188762	-0.598637	8	FALSE	TRUE	TRUE	160	411	38.9294	Tnon_mito	S23|P62266	ENSG00000186468
HYOU1	Hypoxia up-regulated protein 1 OS=Homo sapiens GN=HYOU1 PE=1 SV=1	29	29	250	110000000	110000000	38000000	47000000	35000000	35000000	46000000	58000000	45000000	47000000	68000000	84000000	76250000	52250000	0.685246	0.31312	0.504289	61000000	43500000	0.8	0.570492	-0.321928	-0.809722	8	FALSE	TRUE	TRUE	50	411	12.1655	Tnon_mito	GRP-170|Grp170|HSP12A|ORP-150|ORP150|Q9Y4L1	ENSG00000149428
HSPA4L	Heat shock 70 kDa protein 4L OS=Homo sapiens GN=HSPA4L PE=2 SV=2	1	4	28											11000000		0	11000000				11000000		100	0	6.64386		1	TRUE	TRUE	TRUE	74	411	18.0049	Tnon_mito	APG-1|HSPH3|Osp94|O95757	ENSG00000164070
PAICS	Multifunctional protein ADE2 OS=Homo sapiens GN=PAICS PE=1 SV=3	9	9	27	23000000	20000000	13000000	16000000							43000000	45000000	18000000	44000000	2.44444	0.000500345	3.30073	44000000		2.44444	0	1.28951		2	TRUE	TRUE	TRUE	106	411	25.7908	Tmito	ADE2|ADE2H1|AIRC|PAIS|P22234	ENSG00000128050
CTSB	Cathepsin B OS=Homo sapiens GN=CTSB PE=1 SV=3	4	4	9	12000000									12000000	19000000	22000000	12000000	1.76667e+07	1.47222			1.76667e+07		1.47222	0	0.557995		3	TRUE	TRUE	TRUE	12	411	2.91971	Tpossible_mito	APPS|CPSB|P07858	ENSG00000164733
SIGMAR1	Sigma non-opioid intracellular receptor 1 OS=Homo sapiens GN=SIGMAR1 PE=1 SV=1	3	3	5		16000000				17000000				16000000		16000000	16000000	1.63333e+07	1.02083			16000000	17000000	1	1.0625	0	0.0874628	3	TRUE	TRUE	TRUE	1	411	0.243309	Tnon_mito	ALS16|OPRS1|SIG-1R|SR-BP|SR-BP1|SRBP|hSigmaR1|sigma1R|Q99720	ENSG00000147955
TFRC	Transferrin receptor protein 1 OS=Homo sapiens GN=TFRC PE=1 SV=2	11	11	52	21000000	24000000	6200000	9400000	14000000	20000000	15000000	20000000	19000000	25000000	25000000	22000000	15150000	20000000	1.32013	0.35318	0.452004	22750000	17250000	1.50165	1.13861	0.586549	0.187279	8	FALSE	TRUE	TRUE	47	411	11.4355	Tpossible_mito	CD71|T9|TFR|TFR1|TR|TRFR|p90|P02786	ENSG00000072274
RAD23B	UV excision repair protein RAD23 homolog B OS=Homo sapiens GN=RAD23B PE=1 SV=1	5	5	10	20000000	27000000		11000000	6100000			8300000			11000000	20000000	1.93333e+07	11350000	0.587069	0.229842	0.63857	15500000	7200000	0.801724	0.372414	-0.318822	-1.42502	4	FALSE	TRUE	TRUE	23	411	5.59611	Tnon_mito	HHR23B|HR23B|P58|P54727	ENSG00000119318
BAG3	BAG family molecular chaperone regulator 3 OS=Homo sapiens GN=BAG3 PE=1 SV=3	1	1	1												3100000	0	3100000				3100000		100	0	6.64386		1	TRUE	FALSE	FALSE	27	411	6.56934	Tnon_mito	BAG-3|BIS|CAIR-1|MFM6|O95817	ENSG00000151929
DCTN1	Uncharacterized protein OS=Homo sapiens GN=DCTN1 PE=4 SV=1	22	22	73	53000000	39000000	35000000	27000000		11000000			7300000	7300000	34000000	19000000	38500000	15720000	0.408312	0.0191476	1.71788	16900000	11000000	0.438961	0.285714	-1.18784	-1.80735	5	TRUE	TRUE	TRUE	85	411	20.6813	Tnon_mito	DAP-150|DP-150|P135|Q14203	ENSG00000204843
RPS29	Isoform 2 of 40S ribosomal protein S29 OS=Homo sapiens GN=RPS29	3	3	58	190000000	270000000	75000000	110000000	69000000	60000000	99000000	67000000	100000000	100000000	150000000	140000000	161250000	98125000	0.608527	0.244649	0.611457	122500000	73750000	0.75969	0.457364	-0.396517	-1.12858	8	FALSE	TRUE	TRUE	63	411	15.3285	Tnon_mito	S29|P62273	ENSG00000213741
PEX19	Peroxisomal biogenesis factor 19 OS=Homo sapiens GN=PEX19 PE=1 SV=1	1	1	8	10000000	14000000				6800000		6500000			15000000	16000000	12000000	11075000	0.922917	0.791333	0.101641	15500000	6650000	1.29167	0.554167	0.369234	-0.851608	4	FALSE	FALSE	TRUE	1	411	0.243309	Tnon_mito	D1S2223E|HK33|PBD12A|PMP1|PMPI|PXF|PXMP1|P40855	ENSG00000162735
SGPL1	Sphingosine-1-phosphate lyase 1 OS=Homo sapiens GN=SGPL1 PE=1 SV=3	3	3	5								12000000		11000000		16000000	0	13000000				13500000	12000000	100	100	6.64386	6.64386	3	TRUE	TRUE	TRUE	10	411	2.43309	Tnon_mito	S1PL|SPL|O95470	ENSG00000166224
ATIC	Bifunctional purine biosynthesis protein PURH OS=Homo sapiens GN=ATIC PE=1 SV=3	2	2	2											10000000	10000000	0	10000000				10000000		100	0	6.64386		2	TRUE	FALSE	FALSE	36	411	8.75912	Tmito	AICAR|AICARFT|HEL-S-70p|IMPCHASE|PURH|P31939	ENSG00000138363
REEP5	Receptor expression-enhancing protein 5 (Fragment) OS=Homo sapiens GN=REEP5 PE=4 SV=1	1	1	4	100000000		25000000			39000000	110000000						62500000	74500000	1.192	0.83791	0.0768026		74500000	0	1.192		0.253384	2	FALSE	FALSE	FALSE	4	411	0.973236	Tnon_mito	C5orf18|D5S346|DP1|TB2|YOP1|Q00765	ENSG00000129625
REEP5	Receptor expression-enhancing protein 5 OS=Homo sapiens GN=REEP5 PE=1 SV=3	1	1	7	85000000	99000000		44000000	66000000	90000000	62000000			100000000			76000000	79500000	1.04605	0.86411	0.0634309	100000000	7.26667e+07	1.31579	0.95614	0.395929	-0.0647057	4	FALSE	FALSE	TRUE	4	411	0.973236	Tnon_mito	C5orf18|D5S346|DP1|TB2|YOP1|Q00765	ENSG00000129625
SAR1A	GTP-binding protein SAR1a OS=Homo sapiens GN=SAR1A PE=1 SV=1	1	1	2										14000000		24000000	0	19000000				19000000		100	0	6.64386		2	TRUE	FALSE	FALSE	17	411	4.13625	Tnon_mito	SAR1|SARA1|Sara|masra2|Q9NR31	ENSG00000079332
CUTA	Isoform A of Protein CutA OS=Homo sapiens GN=CUTA	1	1	2											18000000	8400000	0	13200000				13200000		100	0	6.64386		2	TRUE	FALSE	FALSE	4	411	0.973236	Tnon_mito	ACHAP|C6orf82|O60888	ENSG00000112514
WBSCR16	Williams-Beuren syndrome chromosomal region 16 protein OS=Homo sapiens GN=WBSCR16 PE=1 SV=2	1	1	5	15000000	16000000						9500000			12000000	11000000	15500000	1.08333e+07	0.698925	0.0131897	1.87977	11500000	9500000	0.741935	0.612903	-0.430634	-0.706269	3	TRUE	FALSE	TRUE	9	411	2.18978	Tmito	Q96I51	ENSG00000174374
NPC1	Niemann-Pick C1 protein OS=Homo sapiens GN=NPC1 PE=1 SV=2	1	1	1		4800000											4800000	0	0					0	0			0	TRUE	FALSE	FALSE	1	411	0.243309	Tnon_mito	NPC|O15118	ENSG00000141458
CREG1	Protein CREG1 OS=Homo sapiens GN=CREG1 PE=1 SV=1	1	1	1											16000000		0	16000000				16000000		100	0	6.64386		1	TRUE	FALSE	FALSE	3	411	0.729927	Tnon_mito	CREG|O75629	ENSG00000143162
EIF5A	Eukaryotic translation initiation factor 5A-1 OS=Homo sapiens GN=EIF5A PE=1 SV=2	9	9	97	130000000	55000000	16000000	39000000	35000000	18000000	89000000	24000000	28000000	26000000	140000000	120000000	60000000	60000000	1	1	0	78500000	41500000	1.30833	0.691667	0.38773	-0.531851	8	FALSE	TRUE	TRUE	125	411	30.4136	Tnon_mito	EIF-5A|EIF5A1|eIF5AI|P63241	ENSG00000132507
ABCE1	ATP-binding cassette sub-family E member 1 OS=Homo sapiens GN=ABCE1 PE=1 SV=1	12	12	42	69000000	62000000	33000000	33000000	23000000		15000000	22000000	15000000	35000000	62000000	59000000	49250000	33000000	0.670051	0.224028	0.649698	42750000	20000000	0.86802	0.406091	-0.204199	-1.30012	7	FALSE	TRUE	TRUE	40	411	9.73236	Tpossible_mito	ABC38|OABP|RLI|RNASEL1|RNASELI|RNS4I|P61221	ENSG00000164163
GSPT1	Isoform 3 of Eukaryotic peptide chain release factor GTP-binding subunit ERF3A OS=Homo sapiens GN=GSPT1	5	5	11	11000000	18000000	12000000	11000000							37000000	19000000	13000000	28000000	2.15385	0.33668	0.472783	28000000		2.15385	0	1.10692		2	FALSE	TRUE	TRUE	59	411	14.3552	Tnon_mito	551G9.2|ETF3A|GST1|eRF3a|P15170	ENSG00000103342
MARS	Methionine--tRNA ligase, cytoplasmic OS=Homo sapiens GN=MARS PE=1 SV=2	5	5	26	31000000	38000000	12000000	15000000	15000000	17000000	20000000	16000000	17000000	21000000	31000000	26000000	24000000	20375000	0.848958	0.612951	0.212574	23750000	17000000	0.989583	0.708333	-0.0151069	-0.4975	8	FALSE	TRUE	TRUE	107	411	26.0341	Tpossible_mito	METRS|MRS|MTRNS|P56192	ENSG00000166986
PA2G4	Proliferation-associated protein 2G4 OS=Homo sapiens GN=PA2G4 PE=1 SV=3	15	15	194	190000000	210000000	77000000	95000000	73000000	87000000	110000000	130000000	110000000	140000000	240000000	280000000	143000000	146250000	1.02273	0.941168	0.0263328	192500000	100000000	1.34615	0.699301	0.428843	-0.516015	8	FALSE	TRUE	TRUE	104	411	25.3041	Tnon_mito	EBP1|HG4-1|p38-2G4|Q9UQ80	ENSG00000170515
GNL2	Nucleolar GTP-binding protein 2 OS=Homo sapiens GN=GNL2 PE=1 SV=1	1	1	1			63000000										63000000	0	0					0	0			0	TRUE	FALSE	FALSE	45	411	10.9489	Tnon_mito	HUMAUANTIG|NGP1|Ngp-1|Q13823	ENSG00000134697
LARS	Leucine--tRNA ligase, cytoplasmic OS=Homo sapiens GN=LARS PE=1 SV=2	12	12	26	24000000	25000000		7900000			6900000	9900000		13000000	18000000	18000000	1.89667e+07	13160000	0.693849	0.410426	0.386765	1.63333e+07	8400000	0.86116	0.442882	-0.215647	-1.175	5	FALSE	TRUE	TRUE	131	411	31.8735	Tnon_mito	HSPC192|LARS1|LEURS|LEUS|LFIS|LRS|PIG44|RNTLS|hr025Cl|Q9P2J5	ENSG00000133706
DNAJB11	DnaJ homolog subfamily B member 11 OS=Homo sapiens GN=DNAJB11 PE=1 SV=1	3	3	16	27000000	23000000			15000000	17000000	20000000	16000000		16000000	31000000	30000000	25000000	2.07143e+07	0.828571	0.249141	0.603556	2.56667e+07	17000000	1.02667	0.68	0.0379679	-0.556393	7	FALSE	TRUE	TRUE	52	411	12.6521	Tnon_mito	ABBP-2|ABBP2|DJ9|Dj-9|EDJ|ERdj3|ERj3|ERj3p|PRO1080|UNQ537|hDj-9|Q9UBS4	ENSG00000090520
EXOSC4	Exosome complex component RRP41 OS=Homo sapiens GN=EXOSC4 PE=1 SV=3	2	2	6			4500000	4900000		19000000		15000000	15000000	18000000			4700000	16750000	3.56383	0.00101987	2.99146	16500000	17000000	3.51064	3.61702	1.81173	1.8548	4	TRUE	FALSE	TRUE	33	411	8.0292	Tnon_mito	RRP41|RRP41A|Rrp41p|SKI6|Ski6p|hRrp41p|p12A|Q9NPD3	ENSG00000178896
RPS13	40S ribosomal protein S13 OS=Homo sapiens GN=RPS13 PE=1 SV=2	7	7	95	400000000	230000000	230000000	290000000	150000000	170000000	150000000	150000000	180000000	170000000	220000000	220000000	287500000	176250000	0.613043	0.065029	1.18689	197500000	155000000	0.686957	0.53913	-0.541709	-0.891294	8	FALSE	TRUE	TRUE	158	411	38.4428	Tnon_mito	S13|P62277	ENSG00000110700
GNS	N-acetylglucosamine-6-sulfatase OS=Homo sapiens GN=GNS PE=2 SV=1	4	4	24	26000000	27000000	9300000	13000000	18000000	18000000	16000000	20000000	9700000	15000000	25000000	28000000	18825000	18712500	0.994024	0.982844	0.00751543	19425000	18000000	1.03187	0.956175	0.0452647	-0.064653	8	FALSE	TRUE	TRUE	6	411	1.45985	Tnon_mito	G6S|P15586	ENSG00000135677
PRKDC	DNA-dependent protein kinase catalytic subunit OS=Homo sapiens GN=PRKDC PE=1 SV=3	62	62	281	63000000	76000000	21000000	26000000	28000000	35000000	45000000	35000000	31000000	38000000	47000000	47000000	46500000	38250000	0.822581	0.590056	0.229107	40750000	35750000	0.876344	0.768817	-0.190431	-0.379287	8	FALSE	TRUE	TRUE	175	411	42.5791	Tnon_mito	DNA-PKcs|DNAPK|DNPK1|HYRC|HYRC1|XRCC7|p350|P78527	ENSG00000253729
HSPA1L	Heat shock 70 kDa protein 1-like OS=Homo sapiens GN=HSPA1L PE=1 SV=2	1	11	642		70000000	33000000	45000000	23000000	26000000	27000000	33000000	28000000	32000000	57000000	63000000	4.93333e+07	36125000	0.732264	0.355568	0.449077	45000000	27250000	0.912162	0.552365	-0.132638	-0.856307	8	FALSE	TRUE	TRUE	389	411	94.6472	Tpossible_mito	HSP70-1L|HSP70-HOM|HSP70T|hum70t|P34931	ENSG00000204390
RPSA	40S ribosomal protein SA OS=Homo sapiens GN=RPSA PE=1 SV=4	13	13	422	1400000000	980000000	540000000	670000000	690000000	580000000	850000000	570000000	510000000	610000000	970000000	600000000	897500000	672500000	0.749304	0.329747	0.481819	672500000	672500000	0.749304	0.749304	-0.416378	-0.416378	8	FALSE	TRUE	TRUE	160	411	38.9294	Tnon_mito	37LRP|67LR|LAMBR|LAMR1|LBP|LBP/p40|LRP|LRP/LR|NEM/1CHD4|SA|lamR|p40|P08865	ENSG00000168028
RPL17	Isoform 3 of 60S ribosomal protein L17 OS=Homo sapiens GN=RPL17	7	7	124	580000000	450000000	210000000	170000000	240000000	190000000	150000000	230000000	240000000	200000000	360000000	220000000	352500000	228750000	0.648936	0.297531	0.526468	255000000	202500000	0.723404	0.574468	-0.467126	-0.799701	8	FALSE	TRUE	TRUE	190	411	46.2287	Tnon_mito	L17|PD-1|RPL23|P18621	ENSG00000215472
RPS2	40S ribosomal protein S2 OS=Homo sapiens GN=RPS2 PE=1 SV=2	10	10	177	440000000	510000000	380000000	480000000	180000000	210000000	190000000	210000000	210000000	250000000	300000000	300000000	452500000	231250000	0.51105	0.000912922	3.03957	265000000	197500000	0.585635	0.436464	-0.771925	-1.19607	8	TRUE	TRUE	TRUE	210	411	51.0949	Tnon_mito	LLREP3|S2|P15880	ENSG00000140988
RPS20	Isoform 2 of 40S ribosomal protein S20 OS=Homo sapiens GN=RPS20	5	5	146	860000000	890000000	530000000	590000000	220000000	280000000	230000000	300000000	210000000	280000000	320000000	340000000	717500000	272500000	0.379791	0.0151259	1.82028	287500000	257500000	0.400697	0.358885	-1.31942	-1.47841	8	TRUE	TRUE	TRUE	179	411	43.5523	Tnon_mito	S20|P60866	ENSG00000008988
TCP1	T-complex protein 1 subunit alpha OS=Homo sapiens GN=TCP1 PE=1 SV=1	28	28	412	120000000	130000000	85000000	110000000	100000000	120000000	120000000	110000000	110000000	150000000	130000000	140000000	111250000	122500000	1.10112	0.363027	0.440061	132500000	112500000	1.19101	1.01124	0.252187	0.0161197	8	FALSE	TRUE	TRUE	184	411	44.7689	Tnon_mito	CCT-alpha|CCT1|CCTa|D6S230E|TCP-1-alpha|P17987	ENSG00000120438
CCT8	T-complex protein 1 subunit theta OS=Homo sapiens GN=CCT8 PE=1 SV=4	26	26	445	160000000	160000000	140000000	160000000	170000000	220000000	180000000	180000000	210000000	280000000	210000000	220000000	155000000	208750000	1.34677	0.00295161	2.52994	230000000	187500000	1.48387	1.20968	0.569366	0.274622	8	TRUE	TRUE	TRUE	183	411	44.5255	Tnon_mito	C21orf112|Cctq|D21S246|PRED71|P50990	ENSG00000156261
TXNDC12	Thioredoxin domain-containing protein 12 OS=Homo sapiens GN=TXNDC12 PE=1 SV=1	9	9	172	320000000	310000000	310000000	430000000	200000000	360000000	350000000	450000000	390000000	540000000	400000000	700000000	342500000	423750000	1.23723	0.204054	0.690254	507500000	340000000	1.48175	0.992701	0.567304	-0.0105692	8	FALSE	TRUE	TRUE	63	411	15.3285	Tmito	AG1|AGR1|ERP16|ERP18|ERP19|PDIA16|TLP19|hAG-1|hTLP19|O95881	ENSG00000117862
MTPN	Myotrophin OS=Homo sapiens GN=MTPN PE=1 SV=2	1	1	2											49000000		0	49000000				49000000		100	0	6.64386		1	TRUE	FALSE	FALSE	28	411	6.81265	Tnon_mito	GCDP|V-1|P58546	ENSG00000105887
GSTP1	Glutathione S-transferase P OS=Homo sapiens GN=GSTP1 PE=1 SV=2	7	7	15	87000000	26000000									83000000	32000000	56500000	57500000	1.0177	0.98228	0.00776485	57500000		1.0177	0	0.0253111		2	FALSE	TRUE	TRUE	74	411	18.0049	Tpossible_mito	DFN7|FAEES3|GST3|GSTP|HEL-S-22|PI|P09211	ENSG00000084207
PSMA2	Proteasome subunit alpha type-2 OS=Homo sapiens GN=PSMA2 PE=1 SV=2	4	4	18	38000000	22000000	11000000	24000000		13000000		11000000			41000000	25000000	23750000	22500000	0.947368	0.892502	0.049391	33000000	12000000	1.38947	0.505263	0.474539	-0.984893	4	FALSE	TRUE	TRUE	93	411	22.6277	Tnon_mito	HC3|MU|PMSA2|PSC2|P25787	ENSG00000106588
BRI3BP	BRI3-binding protein OS=Homo sapiens GN=BRI3BP PE=1 SV=1	3	3	6	27000000	28000000		11000000					7500000		24000000	12000000	22000000	14500000	0.659091	0.368107	0.434026	14500000		0.659091	0	-0.601451		3	FALSE	TRUE	TRUE	5	411	1.21655	Tpossible_mito	BNAS1|HCCR-1|HCCR-2|HCCRBP-1|KG19|Q8WY22	ENSG00000184992
EEF1G	Elongation factor 1-gamma OS=Homo sapiens GN=EEF1G PE=1 SV=3	23	23	364	420000000	600000000	360000000	440000000	340000000	360000000	300000000	370000000	320000000	430000000	420000000	540000000	455000000	385000000	0.846154	0.284088	0.546546	427500000	342500000	0.93956	0.752747	-0.0899421	-0.409763	8	FALSE	TRUE	TRUE	193	411	46.9586	Tnon_mito	EF1G|GIG35|P26641	ENSG00000254772
TRMT112	tRNA methyltransferase 112 homolog OS=Homo sapiens GN=TRMT112 PE=1 SV=1	5	5	81	56000000	58000000	34000000	44000000	65000000	70000000	79000000	65000000	57000000	66000000	54000000	54000000	48000000	63750000	1.32812	0.0578692	1.23755	57750000	69750000	1.20312	1.45312	0.266787	0.539159	8	FALSE	TRUE	TRUE	25	411	6.08273	Tnon_mito	HSPC152|HSPC170|TRM112|TRMT11-2|Q9UI30	ENSG00000173113
MSH6	DNA mismatch repair protein Msh6 OS=Homo sapiens GN=MSH6 PE=1 SV=2	2	2	2	4900000			1900000									3400000	0	0					0	0			0	TRUE	FALSE	FALSE	56	411	13.6253	Tnon_mito	GTBP|GTMBP|HNPCC5|HSAP|p160|P52701	ENSG00000116062
DNAJC1	DnaJ homolog subfamily C member 1 OS=Homo sapiens GN=DNAJC1 PE=1 SV=1	1	1	9	12000000				8300000	9600000	7600000	12000000	7800000	9300000	10000000	11000000	12000000	9450000	0.7875			9525000	9375000	0.79375	0.78125	-0.333243	-0.356144	8	TRUE	FALSE	TRUE	0	411	0	Tnon_mito	DNAJL1|ERdj1|HTJ1|MTJ1|Q96KC8	ENSG00000136770
MSH2	DNA mismatch repair protein Msh2 OS=Homo sapiens GN=MSH2 PE=1 SV=1	5	5	24	12000000	13000000	5500000	7000000	6200000	9000000	7700000	6000000	7800000	6800000	12000000	13000000	9375000	8562500	0.913333	0.711209	0.148003	9900000	7225000	1.056	0.770667	0.0786098	-0.375821	8	FALSE	TRUE	TRUE	45	411	10.9489	Tnon_mito	COCA1|FCC1|HNPCC|HNPCC1|LCFS2|P43246	ENSG00000095002
PEPD	Xaa-Pro dipeptidase OS=Homo sapiens GN=PEPD PE=1 SV=3	1	1	4					9100000	13000000		9700000		17000000				12200000		0.0067236	2.1724	17000000	10600000	100	100	6.64386	6.64386	4	TRUE	FALSE	FALSE	7	411	1.70316	Tnon_mito	PROLIDASE|P12955	ENSG00000124299
EXOSC10	Exosome component 10 OS=Homo sapiens GN=EXOSC10 PE=1 SV=2	1	1	1			8800000										8800000	0	0					0	0			0	TRUE	FALSE	FALSE	70	411	17.0316	Tnon_mito	PM-Scl|PM/Scl-100|PMSCL|PMSCL2|RRP6|Rrp6p|p2|p3|p4|Q01780	ENSG00000171824
PSMC4	26S protease regulatory subunit 6B OS=Homo sapiens GN=PSMC4 PE=1 SV=2	12	12	53	50000000	44000000	29000000	27000000	18000000	17000000	35000000	15000000	1300000	30000000	54000000	35000000	37500000	25662500	0.684333	0.176674	0.752827	30075000	21250000	0.802	0.566667	-0.318326	-0.819428	8	FALSE	TRUE	TRUE	97	411	23.601	Tpossible_mito	MIP224|RPT3|S6|TBP-7|TBP7|P43686	ENSG00000013275
SARS	Serine--tRNA ligase, cytoplasmic OS=Homo sapiens GN=SARS PE=2 SV=1	4	4	6						5200000					16000000	11000000	0	1.07333e+07				13500000	5200000	100	100	6.64386	6.64386	3	TRUE	TRUE	TRUE	15	411	3.64964	Tpossible_mito	SERRS|SERS|P49591	ENSG00000031698
DNAJB6	DnaJ homolog subfamily B member 6 OS=Homo sapiens GN=DNAJB6 PE=1 SV=2	1	1	1	3200000												3200000	0	0					0	0			0	TRUE	FALSE	FALSE	25	411	6.08273	Tnon_mito	DJ4|DnaJ|HHDJ1|HSJ-2|HSJ2|LGMD1D|LGMD1E|MRJ|MSJ-1|O75190	ENSG00000105993
ABCF2	Isoform 2 of ATP-binding cassette sub-family F member 2 OS=Homo sapiens GN=ABCF2	4	4	15	23000000	26000000							3600000		14000000	13000000	24500000	10200000	0.416327	0.0358889	1.44504	10200000		0.416327	0	-1.26421		3	TRUE	TRUE	TRUE	24	411	5.83942	Tmito	ABC28|EST133090|HUSSY18|Q9UG63	ENSG00000033050
ASCC3	Activating signal cointegrator 1 complex subunit 3 OS=Homo sapiens GN=ASCC3 PE=1 SV=3	7	7	13	18000000	18000000	9500000	14000000							13000000		14875000	13000000	0.87395			13000000		0.87395	0	-0.194378		1	TRUE	TRUE	TRUE	39	411	9.48905	Tnon_mito	ASC1p200|HELIC1|RNAH|Q8N3C0	ENSG00000112249
OLA1	Obg-like ATPase 1 OS=Homo sapiens GN=OLA1 PE=2 SV=1	2	2	5		7200000									14000000	14000000	7200000	14000000	1.94444			14000000		1.94444	0	0.959358		2	TRUE	FALSE	TRUE	41	411	9.97567	Tnon_mito	DOC45|GBP45|GTBP9|GTPBP9|Q9NTK5	ENSG00000138430
HNRNPK	Isoform 3 of Heterogeneous nuclear ribonucleoprotein K OS=Homo sapiens GN=HNRNPK	1	21	470				16000000									16000000	0	0					0	0			0	TRUE	TRUE	TRUE	288	411	70.073	Tnon_mito	CSBP|HNRPK|TUNP|P61978	ENSG00000165119
HNRNPK	Isoform 2 of Heterogeneous nuclear ribonucleoprotein K OS=Homo sapiens GN=HNRNPK	1	21	493	760000000	370000000	40000000	140000000	380000000	150000000	300000000	180000000		140000000	770000000	120000000	327500000	2.91429e+08	0.889858	0.851134	0.0700023	3.43333e+08	252500000	1.04835	0.770992	0.068115	-0.375212	7	FALSE	TRUE	TRUE	288	411	70.073	Tnon_mito	CSBP|HNRPK|TUNP|P61978	ENSG00000165119
KIF2A	Isoform 2 of Kinesin-like protein KIF2A OS=Homo sapiens GN=KIF2A	1	1	1	6400000												6400000	0	0					0	0			0	TRUE	FALSE	FALSE	33	411	8.0292	Tnon_mito	CDCBM3|HK2|KIF2|O00139	ENSG00000068796
PSMA5	Proteasome subunit alpha type-5 OS=Homo sapiens GN=PSMA5 PE=1 SV=3	5	5	28	34000000	35000000	21000000	38000000	15000000	17000000	25000000	19000000	27000000	23000000	47000000	43000000	32000000	27000000	0.84375	0.397711	0.400433	35000000	19000000	1.09375	0.59375	0.129283	-0.752072	8	FALSE	TRUE	TRUE	88	411	21.4112	Tnon_mito	PSC5|ZETA|P28066	ENSG00000143106
PSMB3	Proteasome subunit beta type-3 OS=Homo sapiens GN=PSMB3 PE=1 SV=2	2	2	4			9000000	24000000							38000000	12000000	16500000	25000000	1.51515	0.64035	0.193582	25000000		1.51515	0	0.599462		2	FALSE	FALSE	FALSE	68	411	16.545	Tnon_mito	HC10-II|P49720	ENSG00000108294
SRI	Sorcin OS=Homo sapiens GN=SRI PE=1 SV=1	1	1	1						12000000							0	12000000					12000000	0	100		6.64386	1	TRUE	FALSE	FALSE	15	411	3.64964	Tnon_mito	CP-22|CP22|SCN|V19|P30626	ENSG00000075142
USP9X	Probable ubiquitin carboxyl-terminal hydrolase FAF-X OS=Homo sapiens GN=USP9X PE=1 SV=3	2	2	9	10000000	12000000	7900000								9300000	9200000	9.96667e+06	9250000	0.928094	0.606536	0.217143	9250000		0.928094	0	-0.107658		2	FALSE	FALSE	TRUE	66	411	16.0584	Tnon_mito	DFFRX|FAF|FAM|RP5-1172N10.4|Q93008	ENSG00000124486
AKAP12	A-kinase anchor protein 12 OS=Homo sapiens GN=AKAP12 PE=1 SV=4	12	12	45	15000000	21000000	3500000	7100000	19000000	13000000	12000000	18000000	8600000	11000000	17000000	19000000	11650000	14700000	1.2618	0.508421	0.293777	13900000	15500000	1.19313	1.33047	0.254755	0.411938	8	FALSE	TRUE	TRUE	53	411	12.8954	Tnon_mito	AKAP250|SSeCKS|Q02952	ENSG00000131016
WDR1	WD repeat-containing protein 1 OS=Homo sapiens GN=WDR1 PE=1 SV=4	4	4	6	24000000		16000000	9500000							44000000		16500000	44000000	2.66667			44000000		2.66667	0	1.41504		1	TRUE	TRUE	TRUE	24	411	5.83942	Tnon_mito	AIP1|HEL-S-52|NORI-1|O75083	ENSG00000071127
HMOX2	Heme oxygenase 2 OS=Homo sapiens GN=HMOX2 PE=1 SV=2	5	5	22	14000000	18000000			13000000	21000000	12000000	22000000	22000000	25000000	15000000	19000000	16000000	18625000	1.16406	0.395836	0.402485	20250000	17000000	1.26562	1.0625	0.33985	0.0874628	8	FALSE	TRUE	TRUE	3	411	0.729927	Tnon_mito	HO-2|P30519	ENSG00000103415
SMC1A	Structural maintenance of chromosomes protein 1A OS=Homo sapiens GN=SMC1A PE=1 SV=2	17	17	61	30000000	33000000	6900000	12000000	12000000	13000000	12000000	15000000	18000000	15000000	28000000	22000000	20475000	16875000	0.824176	0.6265	0.203079	20750000	13000000	1.01343	0.634921	0.0192479	-0.655352	8	FALSE	TRUE	TRUE	79	411	19.2214	Tnon_mito	CDLS2|DXS423E|SB1.8|SMC1|SMC1L1|SMC1alpha|SMCB|Q14683	ENSG00000072501
RPL10	60S ribosomal protein L10 OS=Homo sapiens GN=RPL10 PE=2 SV=1	1	6	39		13000000											13000000	0	0					0	0			0	TRUE	TRUE	TRUE	146	411	35.5231	Tnon_mito	AUTSX5|DXS648|DXS648E|L10|NOV|QM|P27635	ENSG00000147403
RPL10	60S ribosomal protein L10 OS=Homo sapiens GN=RPL10 PE=1 SV=4	1	6	71	210000000	180000000	16000000	28000000	67000000	50000000	130000000	69000000	68000000	93000000	180000000	95000000	108500000	94000000	0.866359	0.797999	0.0979978	109000000	79000000	1.00461	0.728111	0.00663309	-0.45777	8	FALSE	TRUE	TRUE	146	411	35.5231	Tnon_mito	AUTSX5|DXS648|DXS648E|L10|NOV|QM|P27635	ENSG00000147403
RPL26	60S ribosomal protein L26 OS=Homo sapiens GN=RPL26 PE=1 SV=1	6	6	50	190000000	220000000	110000000	130000000	47000000	51000000	40000000	49000000	79000000	73000000	83000000	61000000	162500000	60375000	0.371538	0.0252788	1.59724	74000000	46750000	0.455385	0.287692	-1.13484	-1.7974	8	TRUE	TRUE	TRUE	141	411	34.3066	Tnon_mito	DBA11|L26|P61254	ENSG00000161970
PSMB6	Proteasome subunit beta type-6 OS=Homo sapiens GN=PSMB6 PE=1 SV=4	3	3	18	29000000	37000000	19000000	21000000	11000000		15000000	21000000	15000000	20000000	40000000	53000000	26500000	25000000	0.943396	0.838849	0.0763163	32000000	1.56667e+07	1.20755	0.591195	0.27208	-0.758294	7	FALSE	TRUE	TRUE	76	411	18.4915	Tnon_mito	DELTA|LMPY|Y|P28072	ENSG00000142507
RPAP3	RNA polymerase II-associated protein 3 OS=Homo sapiens GN=RPAP3 PE=1 SV=2	2	2	2	12000000										7700000		12000000	7700000	0.641667			7700000		0.641667	0	-0.640104		1	TRUE	FALSE	FALSE	36	411	8.75912	Tnon_mito	Q9H6T3	ENSG00000005175
WARS	Tryptophan--tRNA ligase, cytoplasmic OS=Homo sapiens GN=WARS PE=1 SV=2	1	1	1			23000000										23000000	0	0					0	0			0	TRUE	FALSE	FALSE	107	411	26.0341	Tnon_mito	GAMMA-2|IFI53|IFP53|P23381	ENSG00000140105
PEX14	Peroxisomal membrane protein PEX14 OS=Homo sapiens GN=PEX14 PE=1 SV=1	1	1	2					8200000					6300000			0	7250000				6300000	8200000	100	100	6.64386	6.64386	2	TRUE	FALSE	FALSE	29	411	7.05596	Tnon_mito	NAPP2|PBD13A|Pex14p|dJ734G22.2|O75381	ENSG00000142655
PGAM1	Phosphoglycerate mutase 1 OS=Homo sapiens GN=PGAM1 PE=1 SV=2	7	7	22	26000000	26000000	13000000	17000000				9200000			47000000	53000000	20500000	36400000	1.77561	0.365996	0.436523	50000000	9200000	2.43902	0.44878	1.2863	-1.15592	3	FALSE	TRUE	TRUE	95	411	23.1144	Tnon_mito	HEL-S-35|PGAM-B|PGAMA|P18669	ENSG00000171314
PPIA	Peptidyl-prolyl cis-trans isomerase A OS=Homo sapiens GN=PPIA PE=1 SV=2	8	8	83	72000000	96000000	44000000	54000000	14000000	22000000	12000000	24000000	11000000	21000000	160000000	330000000	66500000	74250000	1.11654	0.858787	0.0661145	130500000	18000000	1.96241	0.270677	0.972624	-1.88536	8	FALSE	TRUE	TRUE	184	411	44.7689	Tnon_mito	CYPA|CYPH|HEL-S-69p|P62937	ENSG00000196262
RAB1A	Ras-related protein Rab-1A OS=Homo sapiens GN=RAB1A PE=1 SV=3	1	7	196		26000000								15000000			26000000	15000000	0.576923			15000000		0.576923	0	-0.793549		1	TRUE	TRUE	TRUE	69	411	16.7883	Tnon_mito	RAB1|YPT1|P62820	ENSG00000138069
RAB2A	Ras-related protein Rab-2A OS=Homo sapiens GN=RAB2A PE=1 SV=1	4	4	29	20000000	24000000			15000000	21000000	15000000	17000000	13000000	20000000	21000000	20000000	22000000	17750000	0.806818	0.226867	0.644228	18500000	17000000	0.840909	0.772727	-0.249978	-0.371969	8	FALSE	TRUE	TRUE	35	411	8.51582	Tnon_mito	LHX|RAB2|P61019	ENSG00000104388
RAB7A	Ras-related protein Rab-7a OS=Homo sapiens GN=RAB7A PE=1 SV=1	13	13	139	77000000	83000000	32000000	35000000	56000000	69000000	64000000	63000000	56000000	79000000	75000000	78000000	56750000	67500000	1.18943	0.489621	0.31014	72000000	63000000	1.26872	1.11013	0.343377	0.150731	8	FALSE	TRUE	TRUE	63	411	15.3285	Tnon_mito	PRO2706|RAB7|P51149	ENSG00000075785
RAB14	Ras-related protein Rab-14 OS=Homo sapiens GN=RAB14 PE=1 SV=4	3	4	130	36000000	29000000			11000000	16000000				12000000	35000000	35000000	32500000	21800000	0.670769	0.162667	0.788701	2.73333e+07	13500000	0.841026	0.415385	-0.249778	-1.26748	5	FALSE	TRUE	TRUE	40	411	9.73236	Tnon_mito	FBP|RAB-14|P61106	ENSG00000119396
PGK1	Phosphoglycerate kinase 1 OS=Homo sapiens GN=PGK1 PE=1 SV=3	6	6	20	25000000	29000000	14000000	12000000							54000000	55000000	20000000	54500000	2.725	0.0033344	2.47698	54500000		2.725	0	1.44626		2	TRUE	TRUE	TRUE	86	411	20.9246	Tnon_mito	HEL-S-68p|MIG10|PGKA|P00558	ENSG00000102144
LIMK1	LIM domain kinase 1 OS=Homo sapiens GN=LIMK1 PE=2 SV=1	1	1	1								2300000					0	2300000					2300000	0	100		6.64386	1	TRUE	FALSE	FALSE	2	411	0.486618	Tnon_mito	LIMK|LIMK-1|P53667	ENSG00000106683
DTX3L	E3 ubiquitin-protein ligase DTX3L OS=Homo sapiens GN=DTX3L PE=1 SV=1	1	1	2								120000000		140000000			0	130000000				140000000	120000000	100	100	6.64386	6.64386	2	TRUE	FALSE	FALSE	4	411	0.973236	Tnon_mito	BBAP|Q8TDB6	ENSG00000163840
TUBB2B	Tubulin beta-2B chain OS=Homo sapiens GN=TUBB2B PE=1 SV=1	2	19	418	9700000				9800000	10000000					15000000	17000000	9700000	12950000	1.33505			16000000	9900000	1.64948	1.02062	0.722015	0.0294438	4	TRUE	TRUE	TRUE	372	411	90.5109	Tnon_mito	PMGYSA|bA506K6.1|Q9BVA1	ENSG00000137285
RHOA	Transforming protein RhoA OS=Homo sapiens GN=RHOA PE=1 SV=1	6	6	33	25000000	18000000	21000000	30000000	34000000	26000000	39000000	27000000	18000000	28000000	27000000	34000000	23500000	29125000	1.23936	0.144428	0.840348	26750000	31500000	1.1383	1.34043	0.186878	0.422691	8	FALSE	TRUE	TRUE	45	411	10.9489	Tpossible_mito	ARH12|ARHA|RHO12|RHOH12|P61586	ENSG00000067560
RAB8A	Ras-related protein Rab-8A OS=Homo sapiens GN=RAB8A PE=1 SV=1	3	5	156	8400000	7900000		8600000	16000000	12000000	19000000	21000000	12000000	13000000		16000000	8300000	1.55714e+07	1.87608	0.00140018	2.85382	1.36667e+07	17000000	1.64659	2.04819	0.719478	1.03435	7	TRUE	TRUE	TRUE	49	411	11.9221	Tnon_mito	MEL|RAB8|P61006	ENSG00000167461
POR	NADPH--cytochrome P450 reductase (Fragment) OS=Homo sapiens GN=POR PE=4 SV=1	1	1	1											9900000		0	9900000				9900000		100	0	6.64386		1	TRUE	FALSE	FALSE	16	411	3.89294	Tpossible_mito	CPR|CYPOR|P450R|P16435	ENSG00000127948
RAB5C	Isoform 2 of Ras-related protein Rab-5C OS=Homo sapiens GN=RAB5C	5	5	44	29000000	31000000	15000000	18000000	15000000	22000000	18000000	26000000	21000000	26000000	22000000	28000000	23250000	22250000	0.956989	0.825942	0.0830503	24250000	20250000	1.04301	0.870968	0.060754	-0.199309	8	FALSE	TRUE	TRUE	61	411	14.8418	Tnon_mito	L1880|RAB5CL|RAB5L|RABL|P51148	ENSG00000108774
RAB11B	Ras-related protein Rab-11B OS=Homo sapiens GN=RAB11B PE=1 SV=4	7	7	50	59000000	37000000	23000000	28000000	27000000	52000000	50000000	40000000	55000000	56000000	40000000	83000000	36750000	50375000	1.37075	0.213795	0.670002	58500000	42250000	1.59184	1.14966	0.670692	0.201207	8	FALSE	TRUE	TRUE	47	411	11.4355	Tpossible_mito	H-YPT3|Q15907	ENSG00000185236
RAB10	Ras-related protein Rab-10 OS=Homo sapiens GN=RAB10 PE=1 SV=1	2	4	182	46000000	33000000	6800000	15000000	24000000	27000000	26000000	24000000	19000000	27000000	37000000	26000000	25200000	26250000	1.04167	0.914079	0.0390165	27250000	25250000	1.08135	1.00198	0.112832	0.00285965	8	FALSE	TRUE	TRUE	56	411	13.6253	Tnon_mito	P61026	ENSG00000084733
CCT6A	T-complex protein 1 subunit zeta OS=Homo sapiens GN=CCT6A PE=1 SV=3	19	19	210	110000000	130000000	86000000	110000000	92000000	110000000	92000000	87000000	150000000	150000000	120000000	120000000	109000000	115125000	1.05619	0.639734	0.194	135000000	95250000	1.23853	0.873853	0.308631	-0.194537	8	FALSE	TRUE	TRUE	177	411	43.0657	Tnon_mito	CCT-zeta|CCT-zeta-1|CCT6|Cctz|HTR3|MoDP-2|TCP-1-zeta|TCP20|TCPZ|TTCP20|P40227	ENSG00000146731
ALKBH6	Alpha-ketoglutarate-dependent dioxygenase alkB homolog 6 OS=Homo sapiens GN=ALKBH6 PE=2 SV=1	1	1	3						16000000			10000000				0	13000000				10000000	16000000	100	100	6.64386	6.64386	2	TRUE	FALSE	FALSE	0	411	0	Tnon_mito	ABH6|Q3KRA9	ENSG00000239382
PSMB4	Proteasome subunit beta type-4 OS=Homo sapiens GN=PSMB4 PE=1 SV=4	1	1	10	14000000	17000000	11000000	12000000	3700000		5400000		6500000	6500000	18000000	19000000	13500000	9850000	0.72963	0.273534	0.562989	12500000	4550000	0.925926	0.337037	-0.111031	-1.56902	6	FALSE	FALSE	TRUE	68	411	16.545	Tnon_mito	HN3|HsN3|PROS-26|PROS26|P28070	ENSG00000159377
RPL31	60S ribosomal protein L31 OS=Homo sapiens GN=RPL31 PE=1 SV=1	3	3	57	410000000	470000000	310000000	380000000	160000000	340000000	240000000	250000000	230000000	260000000	270000000	420000000	392500000	271250000	0.691083	0.0258695	1.58721	295000000	247500000	0.751592	0.630573	-0.411978	-0.665264	8	TRUE	TRUE	TRUE	170	411	41.3625	Tnon_mito	L31|P62899	ENSG00000071082
SNX3	Sorting nexin-3 OS=Homo sapiens GN=SNX3 PE=1 SV=3	1	1	1												11000000	0	11000000				11000000		100	0	6.64386		1	TRUE	FALSE	FALSE	11	411	2.6764	Tnon_mito	Grd19|MCOPS8|SDP3|O60493	ENSG00000112335
GCN1L1	Translational activator GCN1 OS=Homo sapiens GN=GCN1L1 PE=1 SV=6	34	34	118	26000000	13000000	17000000	11000000	40000000	26000000	35000000	14000000	41000000	33000000	44000000	24000000	16750000	32125000	1.91791	0.012094	1.91743	35500000	28750000	2.1194	1.71642	1.08366	0.779401	8	TRUE	TRUE	TRUE	104	411	25.3041	Tnon_mito	GCN1|GCN1L|PRIC295|Q92616	ENSG00000089154
COMT	Catechol O-methyltransferase OS=Homo sapiens GN=COMT PE=1 SV=2	6	6	19	47000000	16000000			19000000	8700000	62000000	10000000	16000000	17000000	8600000		31500000	2.01857e+07	0.640816	0.596492	0.224395	1.38667e+07	24925000	0.440212	0.79127	-1.18373	-0.337758	7	FALSE	TRUE	TRUE	12	411	2.91971	Tmito	HEL-S-98n|P21964	ENSG00000093010
DDX5	Probable ATP-dependent RNA helicase DDX5 OS=Homo sapiens GN=DDX5 PE=2 SV=1	9	16	174	85000000	130000000	41000000	47000000	34000000	53000000	41000000	52000000	37000000	58000000	51000000	70000000	75750000	49500000	0.653465	0.292976	0.533167	54000000	45000000	0.712871	0.594059	-0.488286	-0.751321	8	FALSE	TRUE	TRUE	247	411	60.0973	Tnon_mito	G17P1|HLR1|HUMP68|p68|P17844	ENSG00000108654
DDX17	Probable ATP-dependent RNA helicase DDX17 OS=Homo sapiens GN=DDX17 PE=2 SV=1	9	16	144	61000000	74000000	26000000	30000000	24000000	31000000	34000000	34000000	25000000	25000000	39000000	42000000	47750000	31750000	0.664921	0.267381	0.572869	32750000	30750000	0.685864	0.643979	-0.544006	-0.634914	8	FALSE	TRUE	TRUE	238	411	57.9075	Tnon_mito	P72|RH70|Q92841	ENSG00000100201
DDX42	ATP-dependent RNA helicase DDX42 OS=Homo sapiens GN=DDX42 PE=1 SV=1	5	5	9	34000000	14000000			13000000		17000000						24000000	15000000	0.625	0.530706	0.275146		15000000	0	0.625		-0.678072	2	FALSE	TRUE	TRUE	61	411	14.8418	Tnon_mito	DDX42P|RHELP|RNAHP|SF3b125|Q86XP3	ENSG00000198231
DNAJC9	DnaJ homolog subfamily C member 9 OS=Homo sapiens GN=DNAJC9 PE=1 SV=1	2	2	2											5500000	13000000	0	9250000				9250000		100	0	6.64386		2	TRUE	FALSE	FALSE	25	411	6.08273	Tnon_mito	HDJC9|JDD1|SB73|Q8WXX5	ENSG00000213551
CHD5	Chromodomain-helicase-DNA-binding protein 5 OS=Homo sapiens GN=CHD5 PE=2 SV=1	1	2	4					8900000			41000000		35000000			0	28300000				35000000	24950000	100	100	6.64386	6.64386	3	TRUE	FALSE	FALSE	58	411	14.1119	Tnon_mito	CHD-5|Q8TDI0	ENSG00000116254
DNAJC27	DnaJ homolog subfamily C member 27 OS=Homo sapiens GN=DNAJC27 PE=1 SV=1	1	1	4										26000000	36000000	25000000	0	29000000				29000000		100	0	6.64386		3	TRUE	FALSE	FALSE	0	411	0	Tpossible_mito	RBJ|RabJS|Q9NZQ0	ENSG00000115137
RPL3	60S ribosomal protein L3 OS=Homo sapiens GN=RPL3 PE=1 SV=2	12	12	194	270000000	310000000	97000000	110000000	96000000	120000000	120000000	130000000	140000000	180000000	190000000	220000000	196750000	149500000	0.759848	0.457126	0.339965	182500000	116500000	0.927573	0.592122	-0.108467	-0.756034	8	FALSE	TRUE	TRUE	163	411	39.6594	Tnon_mito	ASC-1|L3|TARBP-B|P39023	ENSG00000100316
CORO1C	Isoform 3 of Coronin-1C OS=Homo sapiens GN=CORO1C	8	8	47	64000000	68000000	46000000	62000000			15000000	14000000		19000000	29000000	29000000	60000000	21200000	0.353333	0.000781792	3.10691	2.56667e+07	14500000	0.427778	0.241667	-1.22507	-2.04891	5	TRUE	TRUE	TRUE	100	411	24.3309	Tnon_mito	HCRNN4|Q9ULV4	ENSG00000110880
RHBDF2	Inactive rhomboid protein 2 OS=Homo sapiens GN=RHBDF2 PE=1 SV=2	1	1	1							24000000						0	24000000					24000000	0	100		6.64386	1	TRUE	FALSE	FALSE	0	411	0	Tnon_mito	RHBDL5|RHBDL6|TOC|TOCG|Q6PJF5	ENSG00000129667
LAMTOR3	Ragulator complex protein LAMTOR3 OS=Homo sapiens GN=LAMTOR3 PE=1 SV=1	1	1	1					18000000								0	18000000					18000000	0	100		6.64386	1	TRUE	FALSE	FALSE	2	411	0.486618	Tnon_mito	MAP2K1IP1|MAPBP|MAPKSP1|MP1|PRO0633|Ragulator3|Q9UHA4	ENSG00000109270
DHX36	ATP-dependent RNA helicase DHX36 OS=Homo sapiens GN=DHX36 PE=1 SV=2	2	3	4	18000000	8600000											13300000	0	0					0	0			0	TRUE	TRUE	FALSE	23	411	5.59611	Tnon_mito	DDX36|G4R1|MLEL1|RHAU|Q9H2U1	ENSG00000174953
RABL3	Rab-like protein 3 OS=Homo sapiens GN=RABL3 PE=1 SV=1	1	1	2			4800000										4800000	0	0					0	0			0	TRUE	FALSE	FALSE	5	411	1.21655	Tnon_mito	Q5HYI8	ENSG00000144840
GNAI3	Guanine nucleotide-binding protein G(k) subunit alpha OS=Homo sapiens GN=GNAI3 PE=1 SV=3	2	2	10		20000000	12000000		8000000	9300000		8500000		7300000	7500000		16000000	8120000	0.5075	0.296963	0.527297	7400000	8600000	0.4625	0.5375	-1.11247	-0.895663	5	FALSE	FALSE	TRUE	53	411	12.8954	Tnon_mito	87U6|ARCND1|P08754	ENSG00000065135
FKBP1A	Peptidyl-prolyl cis-trans isomerase FKBP1A OS=Homo sapiens GN=FKBP1A PE=1 SV=2	1	1	7	14000000	16000000	4600000								27000000	35000000	1.15333e+07	31000000	2.68786	0.0501667	1.29958	31000000		2.68786	0	1.42646		2	FALSE	FALSE	TRUE	13	411	3.16302	Tnon_mito	FKBP-12|FKBP-1A|FKBP1|FKBP12|PKC12|PKCI2|PPIASE|P62942	ENSG00000088832
EIF4H	Eukaryotic translation initiation factor 4H OS=Homo sapiens GN=EIF4H PE=1 SV=5	6	6	28	53000000	39000000	16000000	16000000		37000000	21000000	26000000	38000000	36000000	53000000	61000000	31000000	3.88571e+07	1.25346	0.489579	0.310177	47000000	28000000	1.51613	0.903226	0.600393	-0.146841	7	FALSE	TRUE	TRUE	90	411	21.8978	Tnon_mito	WBSCR1|WSCR1|eIF-4H|Q15056	ENSG00000106682
RANBP1	Ran-specific GTPase-activating protein OS=Homo sapiens GN=RANBP1 PE=1 SV=1	5	5	23	33000000	43000000	27000000	21000000			17000000	19000000	13000000	19000000	120000000	96000000	31000000	4.73333e+07	1.52688	0.447885	0.348833	62000000	18000000	2	0.580645	1	-0.784271	6	FALSE	TRUE	TRUE	90	411	21.8978	Tnon_mito	HTF9A|P43487	ENSG00000099901
MOGS	Mannosyl-oligosaccharide glucosidase OS=Homo sapiens GN=MOGS PE=1 SV=5	4	4	17	34000000	27000000	4200000	10000000	27000000	25000000	8300000	22000000			27000000	14000000	18800000	20550000	1.09309	0.830375	0.0807258	20500000	20575000	1.09043	1.09441	0.124891	0.13016	6	FALSE	TRUE	TRUE	15	411	3.64964	Tnon_mito	CDG2B|CWH41|DER7|GCS1|Q13724	ENSG00000115275
EIF4G1	Isoform 9 of Eukaryotic translation initiation factor 4 gamma 1 OS=Homo sapiens GN=EIF4G1	28	31	329	180000000	220000000	87000000	130000000	58000000	80000000	66000000	77000000	65000000	82000000	100000000	120000000	154250000	81000000	0.525122	0.0821205	1.08555	91750000	70250000	0.594814	0.455429	-0.74949	-1.1347	8	FALSE	TRUE	TRUE	102	411	24.8175	Tnon_mito	EIF-4G1|EIF4F|EIF4G|EIF4GI|P220|PARK18|Q04637	ENSG00000114867
CACNA2D1	Voltage-dependent calcium channel subunit alpha-2/delta-1 OS=Homo sapiens GN=CACNA2D1 PE=1 SV=3	1	1	1													0	0						0	0			0	TRUE	FALSE	FALSE	3	411	0.729927	Tnon_mito	CACNA2|CACNL2A|CCHL2A|LINC01112|lncRNA-N3|P54289	ENSG00000153956
DYNLRB1	Dynein light chain roadblock-type 1 OS=Homo sapiens GN=DYNLRB1 PE=2 SV=1	3	3	32	38000000	34000000	29000000	34000000	21000000	21000000	25000000	20000000	19000000	23000000	36000000	30000000	33750000	24375000	0.722222	0.00793357	2.10053	27000000	21750000	0.8	0.644444	-0.321928	-0.633872	8	TRUE	TRUE	TRUE	35	411	8.51582	Tnon_mito	BITH|BLP|DNCL2A|DNLC2A|ROBLD1|Q9NP97	ENSG00000125971
ANK3	Ankyrin-3 OS=Homo sapiens GN=ANK3 PE=1 SV=3	1	1	3	11000000		5200000	5500000									7.23333e+06	0	0					0	0			0	TRUE	FALSE	FALSE	15	411	3.64964	Tnon_mito	ANKYRIN-G|MRT37|Q12955	ENSG00000151150
DDX3X	ATP-dependent RNA helicase DDX3X OS=Homo sapiens GN=DDX3X PE=1 SV=3	23	24	222	140000000	91000000	43000000	48000000	260000000	56000000	95000000	49000000	45000000	58000000	83000000	54000000	80500000	87500000	1.08696	0.841276	0.0750615	60000000	115000000	0.745342	1.42857	-0.424026	0.514573	8	FALSE	TRUE	TRUE	212	411	51.5815	Tpossible_mito	DBX|DDX14|DDX3|HLP2|O00571	ENSG00000215301
EIF4A1	Eukaryotic initiation factor 4A-I (Fragment) OS=Homo sapiens GN=EIF4A1 PE=3 SV=1	2	14	157	31000000	39000000		3900000								25000000	2.46333e+07	25000000	1.01488			25000000		1.01488	0	0.0213162		1	TRUE	TRUE	TRUE	190	411	46.2287	Tnon_mito	DDX2A|EIF-4A|EIF4A|eIF-4A-I|eIF4A-I|P60842	ENSG00000161960
EIF4A1	Eukaryotic initiation factor 4A-I OS=Homo sapiens GN=EIF4A1 PE=1 SV=1	7	23	333	110000000	130000000	57000000	74000000	39000000	53000000	39000000	48000000	43000000	63000000	85000000	93000000	92750000	57875000	0.623989	0.12373	0.907525	71000000	44750000	0.765499	0.48248	-0.385528	-1.05146	8	FALSE	TRUE	TRUE	190	411	46.2287	Tnon_mito	DDX2A|EIF-4A|EIF4A|eIF-4A-I|eIF4A-I|P60842	ENSG00000161960
ACSL3	Long-chain-fatty-acid--CoA ligase 3 OS=Homo sapiens GN=ACSL3 PE=1 SV=3	4	6	47	21000000	31000000			8800000	23000000	18000000	18000000	16000000	18000000	18000000	20000000	26000000	17475000	0.672115	0.321212	0.493208	18000000	16950000	0.692308	0.651923	-0.530515	-0.617226	8	FALSE	TRUE	TRUE	48	411	11.6788	Tpossible_mito	ACS3|FACL3|PRO2194|O95573	ENSG00000123983
ACSL4	Long-chain-fatty-acid--CoA ligase 4 OS=Homo sapiens GN=ACSL4 PE=1 SV=2	7	9	71	42000000	28000000	14000000	19000000	31000000	27000000	29000000	22000000	19000000	24000000	35000000	25000000	25750000	26500000	1.02913	0.913121	0.0394715	25750000	27250000	1	1.05825	0	0.0816838	8	FALSE	TRUE	TRUE	39	411	9.48905	Tmito	ACS4|FACL4|LACS4|MRX63|MRX68|O60488	ENSG00000068366
FARSA	Phenylalanine--tRNA ligase alpha subunit OS=Homo sapiens GN=FARSA PE=1 SV=3	8	8	43	28000000	37000000	14000000	16000000	16000000		17000000	6600000	14000000	14000000	34000000	33000000	23750000	1.92286e+07	0.809624	0.521518	0.282731	23750000	13200000	1	0.555789	0	-0.84739	7	FALSE	TRUE	TRUE	60	411	14.5985	Tnon_mito	CML33|FARSL|FARSLA|FRSA|PheHA|Q9Y285	ENSG00000179115
SEPT11	Septin-11 OS=Homo sapiens GN=SEPT11 PE=2 SV=1	6	9	71	62000000	74000000	15000000	18000000	28000000	34000000	22000000	24000000	22000000	42000000	57000000	63000000	42250000	36500000	0.863905	0.739789	0.130892	46000000	27000000	1.08876	0.639053	0.122683	-0.645992	8	FALSE	TRUE	TRUE	60	411	14.5985	Tnon_mito	Q9NVA2	ENSG00000138758
WDR11	WD repeat-containing protein 11 OS=Homo sapiens GN=WDR11 PE=1 SV=1	1	1	1				22000000									22000000	0	0					0	0			0	TRUE	FALSE	FALSE	16	411	3.89294	Tnon_mito	BRWD2|DR11|HH14|WDR15|Q9BZH6	ENSG00000120008
WFS1	Wolframin OS=Homo sapiens GN=WFS1 PE=1 SV=2	1	1	6	7400000	5000000					3600000		2700000		6600000	4700000	6200000	4400000	0.709677	0.341207	0.466983	4.66667e+06	3600000	0.752688	0.580645	-0.409876	-0.784271	4	FALSE	FALSE	TRUE	0	411	0	Tpossible_mito	CTRCT41|WFRS|WFS|WFSL|O76024	ENSG00000109501
PFDN1	Prefoldin subunit 1 OS=Homo sapiens GN=PFDN1 PE=1 SV=2	1	1	1													0	0						0	0			0	TRUE	FALSE	FALSE	28	411	6.81265	Tnon_mito	PDF|PFD1|O60925	ENSG00000113068
PRPF19	Pre-mRNA-processing factor 19 OS=Homo sapiens GN=PRPF19 PE=1 SV=1	14	14	116	190000000	160000000	92000000	110000000	61000000	57000000	73000000	65000000	61000000	64000000	120000000	97000000	138000000	74750000	0.541667	0.0608358	1.21584	85500000	64000000	0.619565	0.463768	-0.690672	-1.10852	8	FALSE	TRUE	TRUE	121	411	29.4404	Tnon_mito	NMP200|PRP19|PSO4|SNEV|UBOX4|hPSO4|Q9UMS4	ENSG00000110107
UBQLN1	Ubiquilin-1 OS=Homo sapiens GN=UBQLN1 PE=1 SV=2	1	2	4										7500000	9800000		0	8650000				8650000		100	0	6.64386		2	TRUE	FALSE	FALSE	10	411	2.43309	Tnon_mito	DA41|DSK2|PLIC-1|UBQN|XDRP1|Q9UMX0	ENSG00000135018
EIF3B	Isoform 2 of Eukaryotic translation initiation factor 3 subunit B OS=Homo sapiens GN=EIF3B	33	33	454	460000000	450000000	290000000	360000000	110000000	140000000	130000000	140000000	97000000	130000000	180000000	190000000	390000000	139625000	0.358013	0.00601862	2.2205	149250000	130000000	0.382692	0.333333	-1.38574	-1.58496	8	TRUE	TRUE	TRUE	108	411	26.2774	Tnon_mito	EIF3-ETA|EIF3-P110|EIF3-P116|EIF3S9|PRT1|P55884	ENSG00000106263
RAB34	Ras-related protein Rab-34, isoform NARR OS=Homo sapiens GN=RAB34 PE=1 SV=1	2	2	9	16000000	21000000			16000000		14000000			18000000	14000000	13000000	18500000	15000000	0.810811	0.376732	0.423968	15000000	15000000	0.810811	0.810811	-0.302563	-0.302563	5	FALSE	FALSE	TRUE	2	411	0.486618	Tnon_mito	RAB39|RAH|Q9BZG1	ENSG00000109113
LYST	Lysosomal-trafficking regulator OS=Homo sapiens GN=LYST PE=1 SV=3	1	1	1											22000000		0	22000000				22000000		100	0	6.64386		1	TRUE	FALSE	FALSE	1	411	0.243309	Tnon_mito	CHS|CHS1|Q99698	ENSG00000143669
DHX9	ATP-dependent RNA helicase A OS=Homo sapiens GN=DHX9 PE=1 SV=4	29	29	234	160000000	110000000	52000000	61000000	66000000	54000000	110000000	39000000	52000000	69000000	95000000	59000000	95750000	68000000	0.710183	0.355105	0.449643	68750000	67250000	0.718016	0.70235	-0.477913	-0.509738	8	FALSE	TRUE	TRUE	205	411	49.8783	Tnon_mito	DDX9|LKP|NDH2|NDHII|RHA|Q08211	ENSG00000135829
DOCK2	Dedicator of cytokinesis protein 2 OS=Homo sapiens GN=DOCK2 PE=1 SV=2	1	1	1						230000000							0	230000000					230000000	0	100		6.64386	1	TRUE	FALSE	FALSE	2	411	0.486618	Tnon_mito	Q92608	ENSG00000134516
MARK3	MAP/microtubule affinity-regulating kinase 3 OS=Homo sapiens GN=MARK3 PE=2 SV=1	1	1	2			5200000	5800000									5500000	0	0					0	0			0	TRUE	FALSE	FALSE	7	411	1.70316	Tnon_mito	CTAK1|KP78|PAR1A|Par-1a|P27448	ENSG00000075413
RANBP2	E3 SUMO-protein ligase RanBP2 OS=Homo sapiens GN=RANBP2 PE=1 SV=2	6	6	15	12000000	20000000		10000000		5800000	5000000			4200000	13000000	11000000	14000000	7800000	0.557143	0.166934	0.777455	9400000	5400000	0.671429	0.385714	-0.574694	-1.3744	5	FALSE	TRUE	TRUE	90	411	21.8978	Tpossible_mito	ADANE|ANE1|IIAE3|NUP358|TRP1|TRP2|P49792	ENSG00000153201
SART3	Squamous cell carcinoma antigen recognized by T-cells 3 OS=Homo sapiens GN=SART3 PE=1 SV=1	1	1	5	6700000	10000000					5200000				10000000	10000000	8350000	8400000	1.00599	0.984197	0.00691797	10000000	5200000	1.1976	0.622754	0.260152	-0.683265	3	FALSE	FALSE	TRUE	59	411	14.3552	Tnon_mito	DSAP1|P100|RP11-13G14|TIP110|p110|p110(nrb)|Q15020	ENSG00000075856
DIS3	Exosome complex exonuclease RRP44 OS=Homo sapiens GN=DIS3 PE=1 SV=2	2	2	12	15000000	10000000		4300000	4900000	4100000			4000000	6000000	21000000	8500000	9.76667e+06	8.08333e+06	0.827645	0.697403	0.156516	9875000	4500000	1.01109	0.460751	0.0159145	-1.11794	6	FALSE	FALSE	TRUE	16	411	3.89294	Tnon_mito	2810028N01Rik|EXOSC11|KIAA1008|RRP44|dis3p|Q9Y2L1	ENSG00000083520
NAA15	N-alpha-acetyltransferase 15, NatA auxiliary subunit OS=Homo sapiens GN=NAA15 PE=1 SV=1	15	15	66	29000000	35000000	13000000	14000000	12000000	9700000	14000000	16000000	15000000	18000000	32000000	35000000	22750000	18962500	0.833516	0.578532	0.237673	25000000	12925000	1.0989	0.568132	0.136062	-0.815702	8	FALSE	TRUE	TRUE	32	411	7.78589	Tnon_mito	Ga19|NARG1|NAT1P|NATH|TBDN|TBDN100|Q9BXJ9	ENSG00000164134
TRMT1L	TRMT1-like protein OS=Homo sapiens GN=TRMT1L PE=1 SV=2	1	1	2	14000000	16000000											15000000	0	0					0	0			0	TRUE	FALSE	FALSE	43	411	10.4623	Tnon_mito	C1orf25|MST070|TRM1L|bG120K12.3|Q7Z2T5	ENSG00000121486
TAGAP	Isoform 3 of T-cell activation Rho GTPase-activating protein OS=Homo sapiens GN=TAGAP	1	1	1				6200000									6200000	0	0					0	0			0	TRUE	FALSE	FALSE	1	411	0.243309	Tnon_mito	ARHGAP47|IDDM21|TAGAP1|Q8N103	ENSG00000164691
LRRC15	Isoform 2 of Leucine-rich repeat-containing protein 15 OS=Homo sapiens GN=LRRC15	2	2	4					82000000	110000000							0	96000000					96000000	0	100		6.64386	2	TRUE	FALSE	FALSE	4	411	0.973236	Tnon_mito	LIB|Q8TF66	ENSG00000172061
DST	Dystonin OS=Homo sapiens GN=DST PE=2 SV=2	1	1	1				6500000									6500000	0	0					0	0			0	TRUE	FALSE	FALSE	27	411	6.56934	Tnon_mito	BP240|BPA|BPAG1|CATX-15|CATX15|D6S1101|DMH|DT|EBSB2|HSAN6|MACF2|Q03001	ENSG00000151914
DNAJC2	DnaJ homolog subfamily C member 2 OS=Homo sapiens GN=DNAJC2 PE=1 SV=4	2	2	3		8200000		4900000								9200000	6550000	9200000	1.40458			9200000		1.40458	0	0.490139		1	TRUE	FALSE	FALSE	5	411	1.21655	Tnon_mito	MPHOSPH11|MPP11|ZRF1|ZUO1|Q99543	ENSG00000105821
SMARCAD1	Isoform 2 of SWI/SNF-related matrix-associated actin-dependent regulator of chromatin subfamily A containing DEAD/H box 1 OS=Homo sapiens GN=SMARCAD1	1	1	1	16000000												16000000	0	0					0	0			0	TRUE	FALSE	FALSE	6	411	1.45985	Tnon_mito	ADERM|ETL1|HEL1|Q9H4L7	ENSG00000163104
NOP14	Nucleolar protein 14 OS=Homo sapiens GN=NOP14 PE=1 SV=3	1	1	1			13000000										13000000	0	0					0	0			0	TRUE	FALSE	FALSE	12	411	2.91971	Tpossible_mito	C4orf9|NOL14|RES425|UTP2|P78316	ENSG00000087269
LAMP2	Isoform LAMP-2C of Lysosome-associated membrane glycoprotein 2 OS=Homo sapiens GN=LAMP2	2	2	3				13000000				31000000			5600000		13000000	18300000	1.40769			5600000	31000000	0.430769	2.38462	-1.21501	1.25376	2	TRUE	FALSE	FALSE	4	411	0.973236	Tnon_mito	CD107b|LAMP-2|LAMPB|LGP110|P13473	ENSG00000005893
VTI1B	Vesicle transport through interaction with t-SNAREs homolog 1B OS=Homo sapiens GN=VTI1B PE=1 SV=3	1	1	10	12000000	15000000			6300000	7800000	7300000	8700000	6800000	6200000	10000000	10000000	13500000	7887500	0.584259	0.132211	0.878733	8250000	7525000	0.611111	0.557407	-0.710493	-0.843196	8	FALSE	FALSE	TRUE	2	411	0.486618	Tnon_mito	VTI1|VTI1-LIKE|VTI1L|VTI2|v-SNARE|vti1-rp1|Q9UEU0	ENSG00000100568
UBAP2	Ubiquitin-associated protein 2 OS=Homo sapiens GN=UBAP2 PE=1 SV=1	2	2	4	15000000	8200000										8000000	11600000	8000000	0.689655			8000000		0.689655	0	-0.536053		1	TRUE	FALSE	FALSE	39	411	9.48905	Tnon_mito	UBAP-2|Q5T6F2	ENSG00000137073
GAA	Lysosomal alpha-glucosidase OS=Homo sapiens GN=GAA PE=1 SV=4	1	1	3	5000000										7300000	6200000	5000000	6750000	1.35			6750000		1.35	0	0.432959		2	TRUE	FALSE	FALSE	3	411	0.729927	Tnon_mito	LYAG|P10253	ENSG00000171298
PGRMC1	Membrane-associated progesterone receptor component 1 OS=Homo sapiens GN=PGRMC1 PE=1 SV=3	4	5	54	62000000	72000000	27000000	45000000	35000000	39000000	50000000	51000000	32000000	43000000	64000000	62000000	51500000	47000000	0.912621	0.696187	0.157274	50250000	43750000	0.975728	0.849515	-0.0354488	-0.235289	8	FALSE	TRUE	TRUE	40	411	9.73236	Tnon_mito	HPR6.6|MPR|O00264	ENSG00000101856
STIP1	Stress-induced-phosphoprotein 1 OS=Homo sapiens GN=STIP1 PE=1 SV=1	12	12	120	74000000	86000000	57000000	72000000	40000000	41000000	50000000	40000000	26000000	40000000	110000000	100000000	72250000	55875000	0.773356	0.220545	0.656503	69000000	42750000	0.955017	0.591696	-0.0664012	-0.757073	8	FALSE	TRUE	TRUE	120	411	29.1971	Tnon_mito	HEL-S-94n|HOP|IEF-SSP-3521|P60|STI1|STI1L|P31948	ENSG00000168439
MATR3	Matrin-3 OS=Homo sapiens GN=MATR3 PE=4 SV=1	8	8	24	41000000	31000000		6900000	11000000		5500000		8000000		12000000	5800000	26300000	8460000	0.321673	0.218416	0.660716	8600000	8250000	0.326996	0.313688	-1.61265	-1.6726	5	FALSE	TRUE	TRUE	171	411	41.6058	Tnon_mito	MPD2|VCPDM|P43243	ENSG00000015479
MGME1	Mitochondrial genome maintenance exonuclease 1 OS=Homo sapiens GN=MGME1 PE=1 SV=1	2	2	11	12000000				8400000	10000000	9100000	8400000	10000000	9200000	20000000	14000000	12000000	11137500	0.928125			13300000	8975000	1.10833	0.747917	0.148392	-0.419051	8	TRUE	FALSE	TRUE	2	411	0.486618	Tmito	C20orf72|DDK1|MTDPS11|bA504H3.4|Q9BQP7	ENSG00000125871
DTD2	Probable D-tyrosyl-tRNA(Tyr) deacylase 2 OS=Homo sapiens GN=DTD2 PE=2 SV=1	1	1	2								25000000			23000000		0	24000000				23000000	25000000	100	100	6.64386	6.64386	2	TRUE	FALSE	FALSE	1	411	0.243309	Tnon_mito	C14orf126|Q96FN9	ENSG00000129480
MYO1C	Unconventional myosin-Ic OS=Homo sapiens GN=MYO1C PE=1 SV=4	1	1	1				5000000									5000000	0	0					0	0			0	TRUE	FALSE	FALSE	66	411	16.0584	Tnon_mito	MMI-beta|MMIb|NMI|myr2|O00159	ENSG00000197879
SEPT2	Isoform 2 of Septin-2 OS=Homo sapiens GN=SEPT2	9	9	87	66000000	75000000	24000000	26000000	24000000	19000000	30000000	28000000	25000000	32000000	75000000	59000000	47750000	36500000	0.764398	0.488501	0.311135	47750000	25250000	1	0.528796	0	-0.919217	8	FALSE	TRUE	TRUE	88	411	21.4112	Tnon_mito	DIFF6|NEDD-5|NEDD5|Pnutl3|hNedd5|Q15019	ENSG00000168385
SEPT9	Septin-9 OS=Homo sapiens GN=SEPT9 PE=1 SV=2	10	10	83	41000000	49000000	12000000	14000000	20000000	25000000	26000000	30000000	23000000	26000000	42000000	51000000	29000000	30375000	1.04741	0.898429	0.0465164	35500000	25250000	1.22414	0.87069	0.291766	-0.19977	8	FALSE	TRUE	TRUE	79	411	19.2214	Tnon_mito	AF17q25|MSF|MSF1|NAPB|PNUTL4|SINT1|SeptD1|Q9UHD8	ENSG00000184640
PPP1CB	Serine/threonine-protein phosphatase PP1-beta catalytic subunit OS=Homo sapiens GN=PPP1CB PE=1 SV=3	2	9	24	8800000	9500000								4900000	21000000	9500000	9150000	11800000	1.28962	0.635872	0.19663	11800000		1.28962	0	0.366943		3	FALSE	TRUE	TRUE	121	411	29.4404	Tnon_mito	HEL-S-80p|PP-1B|PP1B|PP1beta|PPP1CD|P62140	ENSG00000213639
RPA3	Replication protein A 14 kDa subunit OS=Homo sapiens GN=RPA3 PE=1 SV=1	4	4	27	27000000	34000000	27000000	18000000	9100000	18000000	17000000	21000000	15000000	22000000	31000000	25000000	26500000	19762500	0.745755	0.144296	0.840745	23250000	16275000	0.877358	0.614151	-0.188762	-0.703335	8	FALSE	TRUE	TRUE	43	411	10.4623	Tnon_mito	REPA3|P35244	ENSG00000106399
NR2C1	Nuclear receptor subfamily 2 group C member 1 (Fragment) OS=Homo sapiens GN=NR2C1 PE=4 SV=1	1	1	1					98000000								0	98000000					98000000	0	100		6.64386	1	TRUE	FALSE	FALSE	12	411	2.91971	Tnon_mito	TR2|P13056	ENSG00000120798
EMC2	ER membrane protein complex subunit 2 OS=Homo sapiens GN=EMC2 PE=1 SV=1	1	1	3		23000000			10000000			17000000					23000000	13500000	0.586957				13500000	0	0.586957		-0.768674	2	TRUE	FALSE	FALSE	4	411	0.973236	Tmito	KIAA0103|TTC35|Q15006	ENSG00000104412
TAB1	TGF-beta-activated kinase 1 and MAP3K7-binding protein 1 OS=Homo sapiens GN=TAB1 PE=1 SV=1	18	18	63	64000000	37000000	68000000	71000000		11000000	31000000	8600000			50000000	23000000	60000000	24720000	0.412	0.0145654	1.83668	36500000	1.68667e+07	0.608333	0.281111	-0.717066	-1.83079	5	TRUE	TRUE	TRUE	45	411	10.9489	Tnon_mito	3'-Tab1|MAP3K7IP1|Q15750	ENSG00000100324
RUVBL2	RuvB-like 2 OS=Homo sapiens GN=RUVBL2 PE=1 SV=3	15	15	101	47000000	50000000	38000000	50000000	17000000	24000000	21000000	31000000	22000000	31000000	50000000	56000000	46250000	31500000	0.681081	0.0287798	1.54091	39750000	23250000	0.859459	0.502703	-0.218499	-0.992223	8	TRUE	TRUE	TRUE	141	411	34.3066	Tnon_mito	ECP51|INO80J|REPTIN|RVB2|TIH2|TIP48|TIP49B|Q9Y230	ENSG00000183207
SF3B2	Splicing factor 3B subunit 2 OS=Homo sapiens GN=SF3B2 PE=1 SV=2	21	21	151	160000000	180000000	83000000	120000000	39000000	48000000	38000000	60000000	21000000	35000000	59000000	78000000	135750000	47250000	0.348066	0.0215752	1.66605	48250000	46250000	0.355433	0.3407	-1.49235	-1.55343	8	TRUE	TRUE	TRUE	134	411	32.6034	Tnon_mito	Cus1|SAP145|SF3B145|SF3b1|SF3b150|Q13435	ENSG00000087365
WDR82	WD repeat-containing protein 82 OS=Homo sapiens GN=WDR82 PE=1 SV=1	2	2	9	31000000			16000000	20000000		20000000	23000000	18000000	22000000		6700000	23500000	1.82833e+07	0.778014	0.611011	0.213951	1.55667e+07	21000000	0.662411	0.893617	-0.594201	-0.162271	6	FALSE	FALSE	TRUE	42	411	10.219	Tnon_mito	MST107|MSTP107|PRO2730|PRO34047|SWD2|TMEM113|WDR82A|Q6UXN9	ENSG00000164091
OSBPL11	Oxysterol-binding protein-related protein 11 OS=Homo sapiens GN=OSBPL11 PE=1 SV=2	1	1	8		16000000			7300000			8900000	8300000	9300000	11000000	11000000	16000000	9300000	0.58125			9900000	8100000	0.61875	0.50625	-0.692571	-0.982078	6	TRUE	FALSE	TRUE	6	411	1.45985	Tnon_mito	ORP-11|ORP11|OSBP12|TCCCIA00292|Q9BXB4	ENSG00000144909
S100A13	Protein S100-A13 OS=Homo sapiens GN=S100A13 PE=1 SV=1	1	1	8	22000000	20000000					11000000	13000000	9600000	8100000	26000000	28000000	21000000	15950000	0.759524	0.224526	0.648732	17925000	12000000	0.853571	0.571429	-0.228416	-0.807355	6	FALSE	FALSE	TRUE	1	411	0.243309	Tnon_mito	Q99584	ENSG00000189171
LARP4	Isoform 4 of La-related protein 4 OS=Homo sapiens GN=LARP4	5	5	29	18000000	22000000	16000000	12000000	9700000	12000000	16000000	12000000	7100000	11000000	14000000	18000000	17000000	12475000	0.733824	0.118027	0.928018	12525000	12425000	0.736765	0.730882	-0.440724	-0.452289	8	FALSE	TRUE	TRUE	34	411	8.27251	Tnon_mito	Q71RC2	ENSG00000161813
APEX1	DNA-(apurinic or apyrimidinic site) lyase OS=Homo sapiens GN=APEX1 PE=1 SV=2	11	11	54	49000000	33000000	12000000		16000000	15000000	23000000	12000000	13000000	5100000	65000000	47000000	3.13333e+07	24512500	0.782314	0.626253	0.20325	32525000	16500000	1.03803	0.526596	0.0538508	-0.925232	8	FALSE	TRUE	TRUE	54	411	13.1387	Tpossible_mito	APE|APE1|APEN|APEX|APX|HAP1|REF1|P27695	ENSG00000100823
CTPS1	CTP synthase 1 OS=Homo sapiens GN=CTPS1 PE=1 SV=2	1	1	1			5400000										5400000	0	0					0	0			0	TRUE	FALSE	FALSE	78	411	18.9781	Tnon_mito	CTPS|P17812	ENSG00000171793
DNAJA1	DnaJ homolog subfamily A member 1 OS=Homo sapiens GN=DNAJA1 PE=1 SV=2	4	4	26	46000000	43000000	12000000	12000000	31000000	32000000	54000000	21000000	22000000	36000000	52000000	27000000	28250000	34375000	1.21681	0.584729	0.233045	34250000	34500000	1.21239	1.22124	0.277853	0.288345	8	FALSE	TRUE	TRUE	115	411	27.9805	Tpossible_mito	DJ-2|DjA1|HDJ2|HSDJ|HSJ2|HSPF4|NEDD7|hDJ-2|P31689	ENSG00000086061
PSMC3	26S protease regulatory subunit 6A OS=Homo sapiens GN=PSMC3 PE=3 SV=1	12	12	87	28000000	34000000	35000000	38000000	9700000	10000000	22000000	8900000	7700000	16000000	29000000	29000000	33750000	16537500	0.49	0.0011121	2.95386	20425000	12650000	0.605185	0.374815	-0.724551	-1.41575	8	TRUE	TRUE	TRUE	113	411	27.4939	Tnon_mito	TBP1|P17980	ENSG00000165916
PSMD10	26S proteasome non-ATPase regulatory subunit 10 OS=Homo sapiens GN=PSMD10 PE=1 SV=1	4	4	11	36000000	42000000	26000000	39000000							47000000	55000000	35750000	51000000	1.42657	0.0758929	1.1198	51000000		1.42657	0	0.512554		2	FALSE	TRUE	TRUE	12	411	2.91971	Tnon_mito	dJ889N15.2|p28|p28(GANK)|O75832	ENSG00000101843
DDX21	Nucleolar RNA helicase 2 OS=Homo sapiens GN=DDX21 PE=1 SV=5	13	14	52	39000000	50000000	16000000	18000000		20000000	12000000	14000000	12000000	14000000	16000000	8300000	30750000	1.37571e+07	0.447387	0.130587	0.884101	12575000	1.53333e+07	0.408943	0.498645	-1.29003	-1.00392	7	FALSE	TRUE	TRUE	179	411	43.5523	Tnon_mito	GUA|GURDB|RH-II/GU|RH-II/GuA|Q9NR30	ENSG00000165732
SPTLC2	Serine palmitoyltransferase 2 OS=Homo sapiens GN=SPTLC2 PE=1 SV=1	1	1	2												15000000	0	15000000				15000000		100	0	6.64386		1	TRUE	FALSE	FALSE	1	411	0.243309	Tmito	HSN1C|LCB2|LCB2A|NSAN1C|SPT2|hLCB2a|O15270	ENSG00000100596
DNAJC10	DnaJ homolog subfamily C member 10 OS=Homo sapiens GN=DNAJC10 PE=1 SV=2	5	5	25	18000000	10000000	6000000	5300000	8500000	6400000	6000000	6400000	10000000	14000000	13000000	6500000	9825000	8850000	0.900763	0.770882	0.113012	10875000	6825000	1.10687	0.694656	0.146486	-0.525628	8	FALSE	TRUE	TRUE	26	411	6.32603	Tnon_mito	ERdj5|JPDI|MTHr|PDIA19|Q8IXB1	ENSG00000077232
ASNA1	ATPase ASNA1 OS=Homo sapiens GN=ASNA1 PE=1 SV=2	1	1	1				12000000									12000000	0	0					0	0			0	TRUE	FALSE	FALSE	11	411	2.6764	Tnon_mito	ARSA-I|ARSA1|ASNA-I|GET3|TRC40|hASNA-I|O43681	ENSG00000198356
PRPSAP1	Isoform 2 of Phosphoribosyl pyrophosphate synthase-associated protein 1 OS=Homo sapiens GN=PRPSAP1	7	8	18	7000000		16000000	19000000									14000000	0	0					0	0			0	TRUE	TRUE	TRUE	59	411	14.3552	Tnon_mito	PAP39|Q14558	ENSG00000161542
GLB1	Beta-galactosidase OS=Homo sapiens GN=GLB1 PE=1 SV=2	1	1	3					8200000		12000000				18000000		0	1.27333e+07				18000000	10100000	100	100	6.64386	6.64386	3	TRUE	FALSE	FALSE	2	411	0.486618	Tnon_mito	EBP|ELNR1|MPS4B|P16278	ENSG00000170266
TPD52	Tumor protein D52 OS=Homo sapiens GN=TPD52 PE=2 SV=1	2	3	8				8600000						9700000		16000000	8600000	12850000	1.49419			12850000		1.49419	0	0.57936		2	TRUE	TRUE	TRUE	18	411	4.37956	Tnon_mito	D52|N8L|PC-1|PrLZ|hD52|P55327	ENSG00000076554
PDCD5	Programmed cell death protein 5 OS=Homo sapiens GN=PDCD5 PE=1 SV=3	3	3	13	22000000		7900000		13000000	6000000	15000000		5700000		37000000	19000000	14950000	15950000	1.06689	0.91684	0.0377064	2.05667e+07	1.13333e+07	1.3757	0.758082	0.460163	-0.399573	6	FALSE	TRUE	TRUE	68	411	16.545	Tnon_mito	TFAR19|O14737	ENSG00000105185
LAMTOR5	Ragulator complex protein LAMTOR5 OS=Homo sapiens GN=LAMTOR5 PE=1 SV=1	1	1	7	49000000	36000000					81000000	29000000			76000000	42000000	42500000	57000000	1.34118	0.368394	0.433687	59000000	55000000	1.38824	1.29412	0.473252	0.371969	4	FALSE	FALSE	TRUE	1	411	0.243309	Tnon_mito	HBXIP|XIP|O43504	ENSG00000134248
SRSF6	Serine/arginine-rich splicing factor 6 OS=Homo sapiens GN=SRSF6 PE=1 SV=2	5	6	52	46000000		17000000	24000000			18000000	16000000	11000000		21000000	24000000	29000000	18000000	0.62069	0.334261	0.475914	1.86667e+07	17000000	0.643678	0.586207	-0.635589	-0.770518	5	FALSE	TRUE	TRUE	139	411	33.82	Tnon_mito	B52|HEL-S-91|SFRS6|SRP55|Q13247	ENSG00000124193
TTC1	Tetratricopeptide repeat protein 1 OS=Homo sapiens GN=TTC1 PE=1 SV=1	6	6	17	15000000	24000000	14000000	18000000	5500000	13000000	13000000	17000000			25000000	14000000	17750000	1.45833e+07	0.821596	0.383941	0.415735	19500000	12125000	1.09859	0.683099	0.135655	-0.549834	6	FALSE	TRUE	TRUE	1	411	0.243309	Tnon_mito	TPR1|Q99614	ENSG00000113312
RPL35	60S ribosomal protein L35 OS=Homo sapiens GN=RPL35 PE=1 SV=2	3	3	32	440000000	490000000	240000000	340000000	230000000	300000000	270000000	370000000	250000000	380000000	290000000	320000000	377500000	301250000	0.798013	0.267799	0.572191	310000000	292500000	0.821192	0.774834	-0.284208	-0.36804	8	FALSE	TRUE	TRUE	156	411	37.9562	Tnon_mito	L35|P42766	ENSG00000136942
CNP	2',3'-cyclic-nucleotide 3'-phosphodiesterase OS=Homo sapiens GN=CNP PE=1 SV=2	9	9	34	17000000	14000000	9400000	11000000	16000000	16000000	16000000	15000000	17000000	14000000	20000000	22000000	12850000	17000000	1.32296	0.0840953	1.07523	18250000	15750000	1.42023	1.22568	0.506128	0.293583	8	FALSE	TRUE	TRUE	26	411	6.32603	Tpossible_mito	CNP1|P09543	ENSG00000173786
GANAB	Isoform 2 of Neutral alpha-glucosidase AB OS=Homo sapiens GN=GANAB	2	32	331	20000000	22000000	13000000	13000000	15000000	18000000	15000000	18000000	20000000	19000000	23000000	22000000	17000000	18750000	1.10294	0.530323	0.27546	21000000	16500000	1.23529	0.970588	0.304855	-0.0430687	8	FALSE	TRUE	TRUE	105	411	25.5474	Tnon_mito	G2AN|GLUII|Q14697	ENSG00000089597
GANAB	Neutral alpha-glucosidase AB OS=Homo sapiens GN=GANAB PE=1 SV=3	1	31	340	230000000	260000000	72000000	80000000	110000000	120000000	140000000	150000000	130000000	150000000	200000000	200000000	160500000	150000000	0.934579	0.847646	0.0717856	170000000	130000000	1.05919	0.809969	0.0829614	-0.304062	8	FALSE	TRUE	TRUE	105	411	25.5474	Tnon_mito	G2AN|GLUII|Q14697	ENSG00000089597
PELP1	Isoform 2 of Proline-, glutamic acid- and leucine-rich protein 1 OS=Homo sapiens GN=PELP1	1	1	1	7600000												7600000	0	0					0	0			0	TRUE	FALSE	FALSE	37	411	9.00243	Tnon_mito	MNAR|P160|Q8IZL8	ENSG00000141456
ASPH	Aspartyl/asparaginyl beta-hydroxylase OS=Homo sapiens GN=ASPH PE=1 SV=3	3	3	8	13000000	19000000	6500000					13000000	14000000	18000000		20000000	1.28333e+07	16250000	1.26623	0.455856	0.341172	1.73333e+07	13000000	1.35065	1.01299	0.433653	0.0186157	4	FALSE	TRUE	TRUE	14	411	3.40633	Tnon_mito	AAH|BAH|CASQ2BP1|HAAH|JCTN|junctin|Q12797	ENSG00000198363
USP7	Ubiquitin carboxyl-terminal hydrolase 7 OS=Homo sapiens GN=USP7 PE=1 SV=2	1	1	3	6900000		5400000				2500000						6150000	2500000	0.406504				2500000	0	0.406504		-1.29866	1	TRUE	FALSE	FALSE	65	411	15.8151	Tnon_mito	HAUSP|TEF1|Q93009	ENSG00000187555
KRT1	SWISS-PROT:P04264 Tax_Id=9606 Gene_Symbol=KRT1 Keratin, type II cytoskeletal 1	32	37	1400	2400000000	2200000000	1600000000	1700000000	1200000000	1000000000	1900000000	1700000000	1900000000	2500000000	2100000000	2100000000	1975000000	1800000000	0.911392	0.520757	0.283365	2150000000	1450000000	1.08861	0.734177	0.122484	-0.4458	8	FALSE	TRUE	TRUE	386	411	93.9173	Tnon_mito	CK1|EHK|EHK1|EPPK|K1|KRT1A|NEPPK|P04264	ENSG00000167768
CLPTM1	Cleft lip and palate transmembrane protein 1 OS=Homo sapiens GN=CLPTM1 PE=1 SV=1	2	2	9		6200000					5100000	6800000	4200000	5600000	7000000		6200000	5740000	0.925806			5600000	5950000	0.903226	0.959677	-0.146841	-0.0593785	5	TRUE	FALSE	TRUE	2	411	0.486618	Tnon_mito	O96005	ENSG00000104853
EIF3L	Eukaryotic translation initiation factor 3 subunit L OS=Homo sapiens GN=EIF3L PE=1 SV=1	26	26	314	200000000	220000000	170000000	210000000	60000000	74000000	61000000	73000000	57000000	77000000	93000000	110000000	200000000	75625000	0.378125	0.000142237	3.84699	84250000	67000000	0.42125	0.335	-1.24725	-1.57777	8	TRUE	TRUE	TRUE	92	411	22.3844	Tnon_mito	EIF3EIP|EIF3S11|EIF3S6IP|HSPC021|HSPC025|MSTP005|Q9Y262	ENSG00000100129
ACTN1	Isoform 4 of Alpha-actinin-1 OS=Homo sapiens GN=ACTN1	7	22	144	24000000	21000000	11000000	7500000	16000000	8400000	32000000		12000000	9600000	24000000	15000000	15875000	1.67143e+07	1.05287	0.873574	0.0587001	15150000	18800000	0.954331	1.18425	-0.0674388	0.243976	7	FALSE	TRUE	TRUE	128	411	31.1436	Tnon_mito	BDPLT15|P12814	ENSG00000072110
BLVRB	Flavin reductase (NADPH) OS=Homo sapiens GN=BLVRB PE=1 SV=3	2	2	3			5000000	7700000							38000000		6350000	38000000	5.98425			38000000		5.98425	0	2.58117		1	TRUE	FALSE	FALSE	10	411	2.43309	Tnon_mito	BVRB|FLR|HEL-S-10|SDR43U1|P30043	ENSG00000090013
PCBP1	Poly(rC)-binding protein 1 OS=Homo sapiens GN=PCBP1 PE=1 SV=2	9	12	134	55000000	64000000	19000000	24000000	25000000	35000000	22000000	26000000	20000000	31000000	71000000	65000000	40500000	36875000	0.910494	0.793549	0.100426	46750000	27000000	1.15432	0.666667	0.207044	-0.584963	8	FALSE	TRUE	TRUE	194	411	47.2019	Tnon_mito	HEL-S-85|HNRPE1|HNRPX|hnRNP-E1|hnRNP-X|Q15365	ENSG00000169564
PLEC	Plectin OS=Homo sapiens GN=PLEC PE=1 SV=3	1	1	3			240000000				140000000						240000000	140000000	0.583333				140000000	0	0.583333		-0.777608	1	TRUE	FALSE	FALSE	109	411	26.5207	Tnon_mito	EBS1|EBSO|HD1|LGMD2Q|PCN|PLEC1|PLEC1b|PLTN|Q15149	ENSG00000178209
SPTBN1	Spectrin beta chain, non-erythrocytic 1 OS=Homo sapiens GN=SPTBN1 PE=1 SV=2	59	59	216	91000000	60000000	41000000	47000000	8000000	10000000	29000000	19000000	11000000	15000000	45000000	19000000	59750000	19500000	0.32636	0.0288267	1.5402	22500000	16500000	0.376569	0.276151	-1.40901	-1.85647	8	TRUE	TRUE	TRUE	143	411	34.7932	Tnon_mito	ELF|HEL102|SPTB2|betaSpII|Q01082	ENSG00000115306
GNB2L1	Guanine nucleotide-binding protein subunit beta-2-like 1 OS=Homo sapiens GN=GNB2L1 PE=1 SV=3	20	20	487	950000000	780000000	550000000	620000000	400000000	420000000	480000000	430000000	330000000	480000000	670000000	490000000	725000000	462500000	0.637931	0.0524287	1.28043	492500000	432500000	0.67931	0.596552	-0.557857	-0.745281	8	FALSE	TRUE	TRUE	135	411	32.8467	Tpossible_mito	Gnb2-rs1|H12.3|HLC-7|PIG21|RACK1|P63244	ENSG00000204628
LRRC59	Leucine-rich repeat-containing protein 59 OS=Homo sapiens GN=LRRC59 PE=1 SV=1	10	10	134	570000000	190000000	110000000	92000000	190000000	74000000	160000000	46000000	120000000	98000000	340000000	110000000	240500000	142250000	0.591476	0.452562	0.344322	167000000	117500000	0.694387	0.488565	-0.526189	-1.03338	8	FALSE	TRUE	TRUE	80	411	19.4647	Tpossible_mito	p34|Q96AG4	ENSG00000108829
DONSON	Protein downstream neighbor of Son OS=Homo sapiens GN=DONSON PE=1 SV=2	3	3	12	9100000	12000000	4600000	5600000	15000000	9600000		13000000	4300000	17000000	7900000	8400000	7825000	1.07429e+07	1.37289	0.256393	0.591093	9400000	1.25333e+07	1.20128	1.6017	0.26457	0.679608	7	FALSE	TRUE	TRUE	0	411	0	Tnon_mito	B17|C21orf60|Q9NYP3	ENSG00000159147
MYH9	Myosin-9 OS=Homo sapiens GN=MYH9 PE=1 SV=4	54	61	451	190000000	120000000	73000000	72000000	41000000	22000000	55000000	21000000	24000000	24000000	69000000	54000000	113750000	38750000	0.340659	0.0701401	1.15403	42750000	34750000	0.375824	0.305495	-1.41187	-1.71078	8	FALSE	TRUE	TRUE	203	411	49.3917	Tnon_mito	BDPLT6|DFNA17|EPSTS|FTNS|MHA|NMHC-II-A|NMMHC-IIA|NMMHCA|P35579	ENSG00000100345
PEBP1	Phosphatidylethanolamine-binding protein 1 OS=Homo sapiens GN=PEBP1 PE=1 SV=3	7	7	20	42000000	20000000		15000000			26000000				85000000	40000000	2.56667e+07	5.03333e+07	1.96104	0.302755	0.518909	62500000	26000000	2.43506	1.01299	1.28396	0.0186157	3	FALSE	TRUE	TRUE	37	411	9.00243	Tpossible_mito	HCNP|HCNPpp|HEL-210|HEL-S-34|PBP|PEBP|PEBP-1|RKIP|P30086	ENSG00000089220
RAP1B	Ras-related protein Rap-1b OS=Homo sapiens GN=RAP1B PE=1 SV=1	6	6	62	47000000	45000000	21000000	33000000	39000000	28000000	55000000	52000000	66000000	32000000	43000000	55000000	36500000	46250000	1.26712	0.24121	0.617605	49000000	43500000	1.34247	1.19178	0.424885	0.253119	8	FALSE	TRUE	TRUE	48	411	11.6788	Tnon_mito	K-REV|RAL1B|P61224	ENSG00000127314
RPL12	60S ribosomal protein L12 OS=Homo sapiens GN=RPL12 PE=1 SV=1	6	6	172	470000000	430000000	220000000	240000000	240000000	180000000	290000000	230000000	300000000	260000000	380000000	310000000	340000000	273750000	0.805147	0.387147	0.412125	312500000	235000000	0.919118	0.691176	-0.121679	-0.532874	8	FALSE	TRUE	TRUE	201	411	48.9051	Tnon_mito	L12|P30050	ENSG00000197958
ARL8B	ADP-ribosylation factor-like protein 8B OS=Homo sapiens GN=ARL8B PE=1 SV=1	8	8	23	18000000		19000000		75000000	15000000	15000000	12000000	44000000		110000000	13000000	18500000	4.05714e+07	2.19305	0.180393	0.743781	5.56667e+07	29250000	3.00901	1.58108	1.58929	0.660911	7	FALSE	TRUE	TRUE	10	411	2.43309	Tnon_mito	ARL10C|Gie1|Q9NVJ2	ENSG00000134108
MAN2B1	Lysosomal alpha-mannosidase OS=Homo sapiens GN=MAN2B1 PE=1 SV=3	1	1	3	17000000								10000000		19000000		17000000	14500000	0.852941			14500000		0.852941	0	-0.229482		2	TRUE	FALSE	FALSE	2	411	0.486618	Tnon_mito	LAMAN|MANB|O00754	ENSG00000104774
GLA	Alpha-galactosidase A OS=Homo sapiens GN=GLA PE=1 SV=1	5	5	26	49000000	24000000	6300000	6800000	33000000	15000000	54000000	13000000	23000000	22000000	42000000	24000000	21525000	28250000	1.31243	0.576737	0.239023	27750000	28750000	1.2892	1.33566	0.366475	0.417549	8	FALSE	TRUE	TRUE	10	411	2.43309	Tnon_mito	GALA|P06280	ENSG00000102393
GM2A	Ganglioside GM2 activator OS=Homo sapiens GN=GM2A PE=1 SV=4	3	3	3		13000000									9000000		13000000	9000000	0.692308			9000000		0.692308	0	-0.530515		1	TRUE	TRUE	FALSE	5	411	1.21655	Tpossible_mito	GM2-AP|SAP-3|P17900	ENSG00000196743
LGMN	Legumain OS=Homo sapiens GN=LGMN PE=1 SV=1	3	3	21	19000000	15000000			9900000		16000000	17000000	12000000	13000000	25000000	28000000	17000000	1.72714e+07	1.01597	0.936883	0.0283147	19500000	14300000	1.14706	0.841176	0.197939	-0.24952	7	FALSE	TRUE	TRUE	1	411	0.243309	Tnon_mito	AEP|LGMN1|PRSC1|Q99538	ENSG00000100600
PSAP	Saposin-D OS=Homo sapiens GN=PSAP PE=4 SV=1	4	4	20	22000000	12000000	5000000	11000000	13000000	26000000	72000000	50000000	58000000	38000000	47000000	19000000	12500000	40375000	3.23	0.00623076	2.20546	40500000	40250000	3.24	3.22	1.69599	1.68706	8	TRUE	TRUE	TRUE	5	411	1.21655	Tpossible_mito	GLBA|SAP1|P07602	ENSG00000197746
TMEM97	Transmembrane protein 97 OS=Homo sapiens GN=TMEM97 PE=1 SV=1	1	1	3	25000000	32000000	5500000										2.08333e+07	0	0					0	0			0	TRUE	FALSE	FALSE	4	411	0.973236	Tnon_mito	MAC30|Q5BJF2	ENSG00000109084
PLBD1	Phospholipase B-like 1 OS=Homo sapiens GN=PLBD1 PE=1 SV=2	1	1	1					15000000								0	15000000					15000000	0	100		6.64386	1	TRUE	FALSE	FALSE	3	411	0.729927	Tnon_mito	Q6P4A8	ENSG00000121316
ATP1A1	Sodium/potassium-transporting ATPase subunit alpha-1 OS=Homo sapiens GN=ATP1A1 PE=1 SV=1	8	13	92	30000000	42000000	8300000	12000000	13000000	18000000	18000000	18000000	16000000	17000000	36000000	31000000	23075000	20875000	0.904659	0.806747	0.0932628	25000000	16750000	1.08342	0.725894	0.115597	-0.46217	8	FALSE	TRUE	TRUE	45	411	10.9489	Tpossible_mito	P05023	ENSG00000163399
DUSP9	Dual specificity protein phosphatase 9 OS=Homo sapiens GN=DUSP9 PE=1 SV=1	1	1	1							12000000						0	12000000					12000000	0	100		6.64386	1	TRUE	FALSE	FALSE	1	411	0.243309	Tnon_mito	MKP-4|MKP4|Q99956	ENSG00000130829
PABPN1	Polyadenylate-binding protein 2 OS=Homo sapiens GN=PABPN1 PE=1 SV=3	5	5	49	140000000	110000000	58000000	68000000	56000000	45000000	81000000	63000000	42000000	40000000	50000000	40000000	94000000	52125000	0.554521	0.111948	0.950983	43000000	61250000	0.457447	0.651596	-1.12832	-0.617951	8	FALSE	TRUE	TRUE	50	411	12.1655	Tnon_mito	OPMD|PAB2|PABII|PABP-2|PABP2|Q86U42	ENSG00000100836
PRPF40A	Pre-mRNA-processing factor 40 homolog A OS=Homo sapiens GN=PRPF40A PE=1 SV=2	1	1	1		11000000											11000000	0	0					0	0			0	TRUE	FALSE	FALSE	76	411	18.4915	Tnon_mito	FBP-11|FBP11|FLAF1|FNBP3|HIP-10|HIP10|HYPA|NY-REN-6|Prp40|O75400	ENSG00000196504
SH3GL1	Endophilin-A2 OS=Homo sapiens GN=SH3GL1 PE=1 SV=1	1	1	2					4700000								0	4700000					4700000	0	100		6.64386	1	TRUE	FALSE	FALSE	26	411	6.32603	Tnon_mito	CNSA1|EEN|SH3D2B|SH3P8|Q99961	ENSG00000141985
TPT1	Translationally-controlled tumor protein OS=Homo sapiens GN=TPT1 PE=1 SV=1	6	6	13	60000000		12000000		8300000	14000000					100000000	39000000	36000000	40325000	1.12014	0.901864	0.0448591	69500000	11150000	1.93056	0.309722	0.949016	-1.69095	4	FALSE	TRUE	TRUE	22	411	5.3528	Tnon_mito	HRF|TCTP|p02|p23|P13693	ENSG00000133112
ACTN4	Alpha-actinin-4 OS=Homo sapiens GN=ACTN4 PE=1 SV=2	17	32	215	84000000	45000000	26000000	32000000	35000000	18000000	49000000	18000000	21000000	26000000	73000000	46000000	46750000	35750000	0.764706	0.490274	0.309561	41500000	30000000	0.887701	0.641711	-0.171855	-0.640004	8	FALSE	TRUE	TRUE	141	411	34.3066	Tnon_mito	ACTININ-4|FSGS|FSGS1|O43707	ENSG00000130402
CAMK2B	Calcium/calmodulin-dependent protein kinase type II subunit beta OS=Homo sapiens GN=CAMK2B PE=1 SV=3	1	1	7	7200000	7100000				4000000		5300000	5200000	7100000		9300000	7150000	6180000	0.864336	0.35327	0.451894	7200000	4650000	1.00699	0.65035	0.0100537	-0.620713	5	FALSE	FALSE	TRUE	7	411	1.70316	Tnon_mito	CAM2|CAMK2|CAMKB|Q13554	ENSG00000058404
CDC42	Cell division control protein 42 homolog OS=Homo sapiens GN=CDC42 PE=2 SV=1	3	3	29	36000000	29000000	13000000	13000000	24000000	27000000	24000000	24000000	21000000	29000000	28000000	30000000	22750000	25875000	1.13736	0.631299	0.199765	27000000	24750000	1.18681	1.08791	0.247093	0.121562	8	FALSE	TRUE	TRUE	80	411	19.4647	Tnon_mito	CDC42Hs|G25K|P60953	ENSG00000070831
DYNC1H1	Cytoplasmic dynein 1 heavy chain 1 OS=Homo sapiens GN=DYNC1H1 PE=1 SV=5	51	51	146	53000000	28000000	23000000	20000000	12000000	14000000	14000000	6900000	16000000	19000000	47000000	34000000	31000000	20362500	0.656855	0.280107	0.552677	29000000	11725000	0.935484	0.378226	-0.0962153	-1.40268	8	FALSE	TRUE	TRUE	131	411	31.8735	Tnon_mito	DHC1|DHC1a|DNCH1|DNCL|DNECL|DYHC|Dnchc1|HL-3|SMALED1|p22|Q14204	ENSG00000197102
EPHX1	Epoxide hydrolase 1 OS=Homo sapiens GN=EPHX1 PE=1 SV=1	5	5	27	43000000	38000000	19000000	19000000	28000000	34000000	18000000		30000000	40000000	40000000	35000000	29750000	3.21429e+07	1.08043	0.746102	0.127202	36250000	2.66667e+07	1.21849	0.896359	0.285091	-0.157852	7	FALSE	TRUE	TRUE	6	411	1.45985	Tnon_mito	EPHX|EPOX|HYL1|MEH|P07099	ENSG00000143819
FABP5	Fatty acid-binding protein, epidermal OS=Homo sapiens GN=FABP5 PE=1 SV=3	4	4	8	9000000		11000000	15000000							24000000	36000000	1.16667e+07	30000000	2.57143	0.178264	0.748936	30000000		2.57143	0	1.36257		2	FALSE	TRUE	TRUE	38	411	9.24574	Tnon_mito	E-FABP|EFABP|KFABP|PA-FABP|PAFABP|Q01469	ENSG00000164687
GNB2	Guanine nucleotide-binding protein G(I)/G(S)/G(T) subunit beta-2 OS=Homo sapiens GN=GNB2 PE=1 SV=3	1	3	11	14000000					13000000	12000000	11000000	11000000	15000000	11000000	15000000	14000000	1.25714e+07	0.897959			13000000	12000000	0.928571	0.857143	-0.106915	-0.222392	7	TRUE	TRUE	TRUE	63	411	15.3285	Tnon_mito	P62879	ENSG00000172354
GOT1	Aspartate aminotransferase, cytoplasmic OS=Homo sapiens GN=GOT1 PE=1 SV=3	1	1	1												4100000	0	4100000				4100000		100	0	6.64386		1	TRUE	FALSE	FALSE	11	411	2.6764	Tpossible_mito	ASTQTL1|GIG18|cAspAT|cCAT|P17174	ENSG00000120053
GSTM2	Glutathione S-transferase Mu 2 OS=Homo sapiens GN=GSTM2 PE=2 SV=1	1	1	1			46000000										46000000	0	0					0	0			0	TRUE	FALSE	FALSE	8	411	1.94647	Tnon_mito	GST4|GSTM|GSTM2-2|GTHMUS|P28161	ENSG00000213366
MYL6	Isoform Smooth muscle of Myosin light polypeptide 6 OS=Homo sapiens GN=MYL6	10	10	119	180000000	190000000	97000000	130000000	59000000	64000000	60000000	78000000	57000000	79000000	110000000	130000000	149250000	79625000	0.533501	0.0406847	1.39057	94000000	65250000	0.629816	0.437186	-0.666998	-1.19368	8	TRUE	TRUE	TRUE	190	411	46.2287	Tnon_mito	ESMLC|LC17|LC17-GI|LC17-NM|LC17A|LC17B|MLC-3|MLC1SM|MLC3NM|MLC3SM|P60660	ENSG00000092841
PPIB	Peptidyl-prolyl cis-trans isomerase B OS=Homo sapiens GN=PPIB PE=1 SV=2	9	9	54	48000000	99000000	20000000	39000000	25000000	12000000	58000000	44000000	24000000	29000000	110000000	120000000	51500000	52750000	1.02427	0.956658	0.0192433	70750000	34750000	1.37379	0.674757	0.458158	-0.567559	8	FALSE	TRUE	TRUE	119	411	28.9538	Tnon_mito	CYP-S1|CYPB|HEL-S-39|OI9|SCYLP|P23284	ENSG00000166794
RAB6A	Ras-related protein Rab-6A OS=Homo sapiens GN=RAB6A PE=1 SV=3	1	2	119		21000000							14000000			27000000	21000000	20500000	0.97619			20500000		0.97619	0	-0.0347654		2	TRUE	FALSE	TRUE	41	411	9.97567	Tnon_mito	RAB6|P20340	ENSG00000175582
RAC1	Isoform B of Ras-related C3 botulinum toxin substrate 1 OS=Homo sapiens GN=RAC1	1	1	10	19000000	19000000			15000000	15000000	16000000	15000000	12000000	15000000	17000000	20000000	19000000	15625000	0.822368	0.00395279	2.4031	16000000	15250000	0.842105	0.802632	-0.247928	-0.31719	8	TRUE	FALSE	TRUE	15	411	3.64964	Tnon_mito	Rac-1|TC-25|p21-Rac1|P63000	ENSG00000136238
RALA	Ras-related protein Ral-A OS=Homo sapiens GN=RALA PE=1 SV=1	1	1	3	11000000				4600000		6100000						11000000	5350000	0.486364				5350000	0	0.486364		-1.03989	2	TRUE	FALSE	FALSE	14	411	3.40633	Tnon_mito	RAL|P11233	ENSG00000006451
RPL7	60S ribosomal protein L7 OS=Homo sapiens GN=RPL7 PE=1 SV=1	14	14	150	410000000	530000000	190000000	230000000	150000000	210000000	190000000	210000000	200000000	260000000	320000000	330000000	340000000	233750000	0.6875	0.276541	0.55824	277500000	190000000	0.816176	0.558824	-0.293047	-0.839535	8	FALSE	TRUE	TRUE	175	411	42.5791	Tnon_mito	L7|humL7-1|P18124	ENSG00000147604
RPL27	60S ribosomal protein L27 OS=Homo sapiens GN=RPL27 PE=1 SV=2	4	4	81	220000000	250000000	110000000	170000000	68000000	92000000	100000000	95000000	110000000	100000000	150000000	170000000	187500000	110625000	0.59	0.0807318	1.09296	132500000	88750000	0.706667	0.473333	-0.500898	-1.07907	8	FALSE	TRUE	TRUE	159	411	38.6861	Tnon_mito	L27|P61353	ENSG00000131469
RPLP0	60S acidic ribosomal protein P0 OS=Homo sapiens GN=RPLP0 PE=1 SV=1	13	13	240	350000000	360000000	160000000	200000000	150000000	200000000	150000000	160000000	160000000	270000000	260000000	330000000	267500000	210000000	0.785047	0.362634	0.440531	255000000	165000000	0.953271	0.616822	-0.0690416	-0.697073	8	FALSE	TRUE	TRUE	206	411	50.1217	Tnon_mito	L10E|LP0|P0|PRLP0|RPP0|P05388	ENSG00000089157
RPS4X	40S ribosomal protein S4, X isoform OS=Homo sapiens GN=RPS4X PE=1 SV=2	14	14	303	410000000	510000000	360000000	430000000	170000000	250000000	190000000	170000000	180000000	260000000	230000000	220000000	427500000	208750000	0.488304	0.00281324	2.55079	222500000	195000000	0.520468	0.45614	-0.942119	-1.13245	8	TRUE	TRUE	TRUE	225	411	54.7445	Tnon_mito	CCG2|DXS306|RPS4|S4|SCAR|SCR10|P62701	ENSG00000198034
SLC3A2	Isoform 4 of 4F2 cell-surface antigen heavy chain OS=Homo sapiens GN=SLC3A2	3	3	20	19000000	18000000	4900000	5300000	10000000	13000000	16000000	12000000	8200000	13000000	11000000	10000000	11800000	11650000	0.987288	0.972013	0.012328	10550000	12750000	0.894068	1.08051	-0.161544	0.11171	8	FALSE	TRUE	TRUE	58	411	14.1119	Tnon_mito	4F2|4F2HC|4T2HC|CD98|CD98HC|MDU1|NACAE|P08195	ENSG00000168003
SPTAN1	Spectrin alpha chain, non-erythrocytic 1 OS=Homo sapiens GN=SPTAN1 PE=1 SV=3	88	88	473	130000000	98000000	61000000	69000000	24000000	19000000	35000000	210000000	19000000	170000000	70000000	43000000	89500000	73750000	0.824022	0.618239	0.208844	75500000	72000000	0.843575	0.804469	-0.245411	-0.313891	8	FALSE	TRUE	TRUE	161	411	39.1727	Tnon_mito	EIEE5|NEAS|SPTA2|Q13813	ENSG00000197694
DYNLL1	Dynein light chain 1, cytoplasmic OS=Homo sapiens GN=DYNLL1 PE=1 SV=1	1	4	47												24000000	0	24000000				24000000		100	0	6.64386		1	TRUE	TRUE	TRUE	64	411	15.5718	Tpossible_mito	DLC1|DLC8|DNCL1|DNCLC1|LC8|LC8a|PIN|hdlc1|P63167	ENSG00000088986
AP1G1	AP-1 complex subunit gamma-1 OS=Homo sapiens GN=AP1G1 PE=2 SV=1	1	1	1													0	0						0	0			0	TRUE	FALSE	FALSE	4	411	0.973236	Tnon_mito	ADTG|CLAPG1|O43747	ENSG00000166747
FARSB	Phenylalanine--tRNA ligase beta subunit OS=Homo sapiens GN=FARSB PE=1 SV=3	9	9	51	48000000	38000000	12000000	18000000		19000000	27000000	21000000	20000000	27000000	48000000	32000000	29000000	2.77143e+07	0.955665	0.895767	0.0478051	31750000	2.23333e+07	1.09483	0.770115	0.130704	-0.376854	7	FALSE	TRUE	TRUE	39	411	9.48905	Tnon_mito	FARSLB|FRSB|PheHB|PheRS|Q9NSD9	ENSG00000116120
KRT6B	SWISS-PROT:P04259 Tax_Id=9606 Gene_Symbol=KRT6B Keratin, type II cytoskeletal 6B	1	28	365			11000000	14000000				13000000					12500000	13000000	1.04				13000000	0	1.04		0.0565835	1	TRUE	TRUE	TRUE	319	411	77.6156	Tnon_mito	CK-6B|CK6B|K6B|KRTL1|PC2|P04259	ENSG00000185479
KRT78	TREMBL:Q7RTT2 Tax_Id=9606 Gene_Symbol=KRT78 Keratin-78	5	7	27	12000000		7600000	9800000			7800000	9000000	9200000	12000000	11000000	11000000	9800000	10000000	1.02041	0.897022	0.0471968	10800000	8400000	1.10204	0.857143	0.140178	-0.222392	6	FALSE	TRUE	TRUE	82	411	19.9513	Tnon_mito	K5B|Kb40|Q8N1N4	ENSG00000170423
TRIM28	Transcription intermediary factor 1-beta OS=Homo sapiens GN=TRIM28 PE=1 SV=5	20	20	180	150000000	120000000	53000000	67000000	55000000	52000000	71000000	54000000	60000000	67000000	150000000	94000000	97500000	75375000	0.773077	0.428258	0.368295	92750000	58000000	0.951282	0.594872	-0.0720549	-0.749349	8	FALSE	TRUE	TRUE	177	411	43.0657	Tnon_mito	KAP1|RNF96|TF1B|TIF1B|Q13263	ENSG00000130726
MED29	Mediator of RNA polymerase II transcription subunit 29 OS=Homo sapiens GN=MED29 PE=1 SV=1	1	1	3	8500000										4100000	5600000	8500000	4850000	0.570588			4850000		0.570588	0	-0.809478		2	TRUE	FALSE	FALSE	0	411	0	Tnon_mito	IXL|Q9NX70	ENSG00000063322
CSTF2	Cleavage stimulation factor subunit 2 OS=Homo sapiens GN=CSTF2 PE=2 SV=1	3	3	3				8600000								11000000	8600000	11000000	1.27907			11000000		1.27907	0	0.355095		1	TRUE	TRUE	FALSE	60	411	14.5985	Tnon_mito	CstF-64|P33240	ENSG00000101811
ILF3	Interleukin enhancer-binding factor 3 OS=Homo sapiens GN=ILF3 PE=1 SV=3	25	25	299	180000000	190000000	96000000	96000000	97000000	120000000	110000000	120000000	110000000	140000000	130000000	120000000	140500000	118375000	0.842527	0.456749	0.340322	125000000	111750000	0.88968	0.795374	-0.168642	-0.330295	8	FALSE	TRUE	TRUE	158	411	38.4428	Tpossible_mito	CBTF|DRBF|DRBP76|MMP4|MPHOSPH4|MPP4|NF-AT-90|NF110|NF110b|NF90|NF90a|NF90b|NFAR|NFAR-1|NFAR2|TCP110|TCP80|Q12906	ENSG00000129351
PLS3	Plastin-3 OS=Homo sapiens GN=PLS3 PE=1 SV=4	20	20	102	65000000	48000000	16000000	21000000	15000000		21000000	12000000	10000000	13000000	79000000	76000000	37500000	3.22857e+07	0.860952	0.759669	0.119376	44500000	16000000	1.18667	0.426667	0.246915	-1.22882	7	FALSE	TRUE	TRUE	41	411	9.97567	Tnon_mito	BMND18|T-plastin|P13797	ENSG00000102024
TJP1	Tight junction protein 1 (Zona occludens 1), isoform CRA_a OS=Homo sapiens GN=TJP1 PE=4 SV=1	1	1	1	4000000												4000000	0	0					0	0			0	TRUE	FALSE	FALSE	35	411	8.51582	Tnon_mito	ZO-1|Q07157	ENSG00000104067
PI4K2A	Phosphatidylinositol 4-kinase type 2-alpha OS=Homo sapiens GN=PI4K2A PE=1 SV=1	1	1	1					5300000								0	5300000					5300000	0	100		6.64386	1	TRUE	FALSE	FALSE	0	411	0	Tpossible_mito	PI4KII|PIK42A|RP11-548K23.6|Q9BTU6	ENSG00000155252
ARPC3	Actin-related protein 2/3 complex subunit 3 OS=Homo sapiens GN=ARPC3 PE=1 SV=3	1	1	5	22000000	28000000		17000000							15000000	16000000	2.23333e+07	15500000	0.69403	0.161806	0.791007	15500000		0.69403	0	-0.52693		2	FALSE	FALSE	TRUE	15	411	3.64964	Tnon_mito	ARC21|p21-Arc|O15145	ENSG00000111229
DDX6	Probable ATP-dependent RNA helicase DDX6 OS=Homo sapiens GN=DDX6 PE=1 SV=2	25	25	219	160000000	140000000	95000000	100000000	140000000	120000000	160000000	100000000	140000000	150000000	160000000	110000000	123750000	135000000	1.09091	0.554152	0.256371	140000000	130000000	1.13131	1.05051	0.177998	0.0710831	8	FALSE	TRUE	TRUE	129	411	31.3869	Tnon_mito	HLR2|P54|RCK|P26196	ENSG00000110367
DKC1	H/ACA ribonucleoprotein complex subunit 4 OS=Homo sapiens GN=DKC1 PE=1 SV=3	2	2	6	4700000	6700000	6800000		4400000	4900000				3800000			6.06667e+06	4.36667e+06	0.71978	0.114992	0.939334	3800000	4650000	0.626374	0.766484	-0.674905	-0.383673	3	FALSE	FALSE	TRUE	74	411	18.0049	Tnon_mito	CBF5|DKC|DKCX|NAP57|NOLA4|XAP101|O60832	ENSG00000130826
EIF2S3	Eukaryotic translation initiation factor 2 subunit 3 OS=Homo sapiens GN=EIF2S3 PE=1 SV=3	18	18	220	200000000	180000000	110000000	140000000	67000000	71000000	68000000	61000000	63000000	67000000	110000000	100000000	157500000	75875000	0.481746	0.0217151	1.66324	85000000	66750000	0.539683	0.42381	-0.889817	-1.23851	8	TRUE	TRUE	TRUE	91	411	22.1411	Tnon_mito	EIF2|EIF2G|EIF2gamma|eIF-2gA|P41091	ENSG00000130741
EIF4A2	Isoform 2 of Eukaryotic initiation factor 4A-II OS=Homo sapiens GN=EIF4A2	1	10	175	61000000	57000000	35000000	30000000	22000000	33000000	26000000	32000000	25000000	32000000	34000000	40000000	45750000	30500000	0.666667	0.142111	0.847374	32750000	28250000	0.715847	0.617486	-0.482277	-0.695521	8	FALSE	TRUE	TRUE	178	411	43.309	Tnon_mito	BM-010|DDX2B|EIF4A|EIF4F|eIF-4A-II|eIF4A-II|Q14240	ENSG00000156976
MSH4	MutS protein homolog 4 OS=Homo sapiens GN=MSH4 PE=1 SV=2	1	1	1										20000000			0	20000000				20000000		100	0	6.64386		1	TRUE	FALSE	FALSE	0	411	0	Tnon_mito	O15457	ENSG00000057468
DRG1	Developmentally-regulated GTP-binding protein 1 OS=Homo sapiens GN=DRG1 PE=1 SV=1	10	10	76	53000000	55000000	19000000	23000000	20000000	20000000	27000000	18000000	22000000	29000000	39000000	31000000	37500000	25750000	0.686667	0.310899	0.50738	30250000	21250000	0.806667	0.566667	-0.309955	-0.819428	8	FALSE	TRUE	TRUE	53	411	12.8954	Tnon_mito	NEDD3|Q9Y295	ENSG00000185721
EXOSC9	Isoform 2 of Exosome complex component RRP45 OS=Homo sapiens GN=EXOSC9	1	1	2			6000000	9000000									7500000	0	0					0	0			0	TRUE	FALSE	FALSE	62	411	15.0852	Tnon_mito	PM/Scl-75|PMSCL1|RRP45|Rrp45p|p5|p6|Q06265	ENSG00000123737
PSMC1	26S protease regulatory subunit 4 OS=Homo sapiens GN=PSMC1 PE=1 SV=1	8	9	75	52000000	49000000	32000000	54000000	18000000	21000000	18000000	17000000	12000000	16000000	39000000	37000000	46750000	22250000	0.475936	0.00702688	2.15324	26000000	18500000	0.55615	0.395722	-0.846455	-1.33744	8	TRUE	TRUE	TRUE	95	411	23.1144	Tnon_mito	P26S4|S4|p56|P62191	ENSG00000100764
PSMC2	26S protease regulatory subunit 7 OS=Homo sapiens GN=PSMC2 PE=1 SV=3	14	14	77	41000000	36000000	39000000	38000000	8800000	14000000	14000000	14000000	12000000	14000000	30000000	28000000	38500000	16850000	0.437662	4.74724e-05	4.32356	21000000	12700000	0.545455	0.32987	-0.874469	-1.60003	8	TRUE	TRUE	TRUE	126	411	30.6569	Tpossible_mito	MSS1|Nbla10058|S7|P35998	ENSG00000161057
PSMC5	26S protease regulatory subunit 8 OS=Homo sapiens GN=PSMC5 PE=1 SV=1	14	15	59	100000000	24000000	47000000	28000000	55000000	25000000	58000000	2700000	13000000	10000000	34000000	16000000	49750000	26712500	0.536935	0.289665	0.538104	18250000	35175000	0.366834	0.707035	-1.4468	-0.500146	8	FALSE	TRUE	TRUE	116	411	28.2238	Tnon_mito	S8|SUG-1|SUG1|TBP10|TRIP1|p45|p45/SUG|P62195	ENSG00000087191
RECQL	ATP-dependent DNA helicase Q1 OS=Homo sapiens GN=RECQL PE=1 SV=3	1	1	1												3700000	0	3700000				3700000		100	0	6.64386		1	TRUE	FALSE	FALSE	23	411	5.59611	Tnon_mito	RECQL1|RecQ1|P46063	ENSG00000004700
RFC2	Replication factor C subunit 2 OS=Homo sapiens GN=RFC2 PE=1 SV=3	2	2	16	30000000	24000000	13000000	11000000	12000000	14000000	13000000	13000000	14000000	13000000	21000000	25000000	19500000	15625000	0.801282	0.467922	0.329827	18250000	13000000	0.935897	0.666667	-0.0955777	-0.584963	8	FALSE	FALSE	TRUE	56	411	13.6253	Tnon_mito	RFC40|P35250	ENSG00000049541
RFC3	Replication factor C subunit 3 OS=Homo sapiens GN=RFC3 PE=1 SV=2	3	3	11	18000000	14000000	4400000	5400000						6200000	11000000	8400000	10450000	8.53333e+06	0.816587	0.622126	0.206122	8.53333e+06		0.816587	0	-0.292322		3	FALSE	TRUE	TRUE	37	411	9.00243	Tnon_mito	RFC38|P40938	ENSG00000133119
RFC4	Replication factor C subunit 4 OS=Homo sapiens GN=RFC4 PE=1 SV=2	8	8	18	14000000		18000000	21000000		23000000		17000000		24000000		16000000	1.76667e+07	20000000	1.13208	0.455584	0.341432	20000000	20000000	1.13208	1.13208	0.17897	0.17897	4	FALSE	TRUE	TRUE	58	411	14.1119	Tnon_mito	A1|RFC37|P35249	ENSG00000163918
RFC5	Replication factor C subunit 5 OS=Homo sapiens GN=RFC5 PE=1 SV=1	3	3	7	39000000	15000000		1900000			47000000		33000000		53000000		1.86333e+07	4.43333e+07	2.37925	0.126629	0.897467	43000000	47000000	2.30769	2.52236	1.20645	1.33477	3	FALSE	TRUE	TRUE	30	411	7.29927	Tnon_mito	RFC36|P40937	ENSG00000111445
SCD	Acyl-CoA desaturase OS=Homo sapiens GN=SCD PE=1 SV=2	3	3	13	30000000	26000000		13000000	14000000	19000000	24000000	18000000	14000000	18000000	24000000	18000000	23000000	18625000	0.809783	0.486864	0.312592	18500000	18750000	0.804348	0.815217	-0.314109	-0.294743	8	FALSE	TRUE	TRUE	6	411	1.45985	Tnon_mito	FADS5|MSTP008|SCD1|SCDOS|O00767	ENSG00000099194
TARBP2	RISC-loading complex subunit TARBP2 OS=Homo sapiens GN=TARBP2 PE=1 SV=3	1	1	3	6900000	7500000										4600000	7200000	4600000	0.638889			4600000		0.638889	0	-0.646363		1	TRUE	FALSE	FALSE	0	411	0	Tnon_mito	LOQS|TRBP|TRBP1|TRBP2|Q15633	ENSG00000139546
DDX39B	Spliceosome RNA helicase DDX39B OS=Homo sapiens GN=DDX39B PE=2 SV=1	6	14	66	31000000	38000000	10000000	12000000	15000000	17000000	19000000	19000000	14000000	17000000	28000000	37000000	22750000	20750000	0.912088	0.80235	0.0956361	24000000	17500000	1.05495	0.769231	0.0771679	-0.378512	8	FALSE	TRUE	TRUE	138	411	33.5766	Tnon_mito	BAT1|D6S81E|UAP56|Q13838	ENSG00000198563
RUVBL1	RuvB-like 1 OS=Homo sapiens GN=RUVBL1 PE=1 SV=1	13	13	99	79000000	56000000	65000000	62000000	44000000	34000000	55000000	25000000	49000000	32000000	84000000	53000000	65500000	47000000	0.717557	0.0462932	1.33448	54500000	39500000	0.832061	0.603053	-0.265239	-0.729642	8	TRUE	TRUE	TRUE	152	411	36.983	Tnon_mito	ECP54|INO80H|NMP238|PONTIN|Pontin52|RVB1|TIH1|TIP49|TIP49A|Q9Y265	ENSG00000175792
EIF4A3	Eukaryotic initiation factor 4A-III OS=Homo sapiens GN=EIF4A3 PE=1 SV=4	5	7	47	40000000	30000000	17000000	19000000	17000000	23000000	21000000	26000000	19000000	27000000	37000000	26000000	26500000	24500000	0.924528	0.745824	0.127364	27250000	21750000	1.0283	0.820755	0.0402639	-0.284977	8	FALSE	TRUE	TRUE	147	411	35.7664	Tnon_mito	DDX48|MUK34|NMP265|NUK34|eIF4AIII|P38919	ENSG00000141543
DDX39A	ATP-dependent RNA helicase DDX39A OS=Homo sapiens GN=DDX39A PE=1 SV=2	1	9	27												14000000	0	14000000				14000000		100	0	6.64386		1	TRUE	TRUE	TRUE	138	411	33.5766	Tnon_mito	BAT1|BAT1L|DDX39|DDXL|URH49|O00148	ENSG00000123136
SPTLC1	Serine palmitoyltransferase 1 OS=Homo sapiens GN=SPTLC1 PE=1 SV=1	6	6	26	36000000	35000000	22000000	21000000	27000000	33000000	23000000	21000000	22000000	47000000	45000000	35000000	28500000	31625000	1.10965	0.581362	0.235553	37250000	26000000	1.30702	0.912281	0.386279	-0.13245	8	FALSE	TRUE	TRUE	12	411	2.91971	Tnon_mito	HSAN1|HSN1|LBC1|LCB1|SPT1|SPTI|O15269	ENSG00000090054
METAP2	Methionine aminopeptidase 2 OS=Homo sapiens GN=METAP2 PE=1 SV=1	4	4	16	17000000	14000000	5000000	4700000							18000000	14000000	10175000	16000000	1.57248	0.192917	0.71463	16000000		1.57248	0	0.653043		2	FALSE	TRUE	TRUE	4	411	0.973236	Tnon_mito	MAP2|MNPEP|p67|p67eIF2|P50579	ENSG00000111142
DDX20	Probable ATP-dependent RNA helicase DDX20 OS=Homo sapiens GN=DDX20 PE=1 SV=2	4	4	22	26000000	39000000	13000000	15000000	8800000	12000000	12000000		16000000		15000000	27000000	23250000	1.51333e+07	0.650896	0.278575	0.555057	1.93333e+07	1.09333e+07	0.831541	0.470251	-0.26614	-1.0885	6	FALSE	TRUE	TRUE	40	411	9.73236	Tnon_mito	DP103|GEMIN3|Q9UHI6	ENSG00000064703
EXOSC8	Exosome complex component RRP43 OS=Homo sapiens GN=EXOSC8 PE=1 SV=1	1	1	4	21000000	22000000	9400000	11000000									15850000	0	0					0	0			0	TRUE	FALSE	FALSE	43	411	10.4623	Tnon_mito	CIP3|EAP2|OIP2|RP11-421P11.3|RRP43|Rrp43p|bA421P11.3|p9|Q96B26	ENSG00000120699
DNAJC8	DnaJ homolog subfamily C member 8 OS=Homo sapiens GN=DNAJC8 PE=1 SV=2	8	8	28	34000000	33000000		28000000	21000000	16000000	18000000	22000000	21000000	23000000	44000000	29000000	3.16667e+07	24250000	0.765789	0.0720614	1.1423	29250000	19250000	0.923684	0.607895	-0.114528	-0.718107	8	FALSE	TRUE	TRUE	51	411	12.4088	Tnon_mito	HSPC331|SPF31|O75937	ENSG00000126698
DICER1	Endoribonuclease Dicer OS=Homo sapiens GN=DICER1 PE=1 SV=3	1	1	1	16000000												16000000	0	0					0	0			0	TRUE	FALSE	FALSE	13	411	3.16302	Tnon_mito	DCR1|Dicer|HERNA|MNG1|RMSE2|Q9UPY3	ENSG00000100697
ACAP2	Arf-GAP with coiled-coil, ANK repeat and PH domain-containing protein 2 OS=Homo sapiens GN=ACAP2 PE=1 SV=3	2	2	2				7000000									7000000	0	0					0	0			0	TRUE	FALSE	FALSE	38	411	9.24574	Tnon_mito	CENTB2|CNT-B2|Q15057	ENSG00000114331
GNL3	Guanine nucleotide-binding protein-like 3 OS=Homo sapiens GN=GNL3 PE=1 SV=2	3	3	6	13000000	25000000		4700000							6300000		1.42333e+07	6300000	0.442623			6300000		0.442623	0	-1.17585		1	TRUE	TRUE	TRUE	80	411	19.4647	Tnon_mito	C77032|E2IG3|NNP47|NS|Q9BVP2	ENSG00000163938
DIMT1	Probable dimethyladenosine transferase OS=Homo sapiens GN=DIMT1 PE=1 SV=1	1	1	1				8700000									8700000	0	0					0	0			0	TRUE	FALSE	FALSE	20	411	4.86618	Tnon_mito	DIM1|DIMT1L|HSA9761|HUSSY5|Q9UNQ2	ENSG00000086189
TMX2	Thioredoxin-related transmembrane protein 2 OS=Homo sapiens GN=TMX2 PE=1 SV=1	1	1	1		18000000											18000000	0	0					0	0			0	TRUE	FALSE	FALSE	0	411	0	Tnon_mito	PDIA12|PIG26|TXNDC14|Q9Y320	ENSG00000213593
DDX47	Probable ATP-dependent RNA helicase DDX47 OS=Homo sapiens GN=DDX47 PE=1 SV=1	1	1	1													0	0						0	0			0	TRUE	FALSE	FALSE	45	411	10.9489	Tnon_mito	E4-DBP|HQ0256|MSTP162|RRP3|Q9H0S4	ENSG00000213782
ANKHD1	Isoform 6 of Ankyrin repeat and KH domain-containing protein 1 OS=Homo sapiens GN=ANKHD1	1	1	2						1800000				2300000			0	2050000				2300000	1800000	100	100	6.64386	6.64386	2	TRUE	FALSE	FALSE	35	411	8.51582	Tnon_mito	MASK|VBARP	ENSG00000131503
EXOSC5	Exosome complex component RRP46 OS=Homo sapiens GN=EXOSC5 PE=1 SV=1	3	3	12	41000000	13000000		12000000		9700000	7700000	7400000	6600000	11000000	24000000	6800000	22000000	1.04571e+07	0.475325	0.348041	0.458369	12100000	8.26667e+06	0.55	0.375758	-0.862496	-1.41213	7	FALSE	TRUE	TRUE	17	411	4.13625	Tnon_mito	RRP41B|RRP46|Rrp46p|hRrp46p|p12B|Q9NQT4	ENSG00000077348
NXN	Nucleoredoxin (Fragment) OS=Homo sapiens GN=NXN PE=4 SV=1	1	1	1			92000000										92000000	0	0					0	0			0	TRUE	FALSE	FALSE	5	411	1.21655	Tnon_mito	NRX|TRG-4|Q6DKJ4	ENSG00000167693
DDX50	ATP-dependent RNA helicase DDX50 OS=Homo sapiens GN=DDX50 PE=1 SV=1	1	2	10	6600000	6700000											6650000	0	0					0	0			0	TRUE	FALSE	TRUE	119	411	28.9538	Tnon_mito	GU2|GUB|RH-II/GuB|mcdrh|Q9BQ39	ENSG00000107625
DDX54	Isoform 2 of ATP-dependent RNA helicase DDX54 OS=Homo sapiens GN=DDX54	1	1	1		7900000											7900000	0	0					0	0			0	TRUE	FALSE	FALSE	49	411	11.9221	Tnon_mito	DP97|Q8TDD1	ENSG00000123064
TMX1	Thioredoxin-related transmembrane protein 1 OS=Homo sapiens GN=TMX1 PE=1 SV=1	9	9	109	80000000	94000000	36000000	49000000	61000000	69000000	65000000	75000000	66000000	82000000	79000000	83000000	64750000	72500000	1.11969	0.60905	0.215347	77500000	67500000	1.19691	1.04247	0.259316	0.0600073	8	FALSE	TRUE	TRUE	23	411	5.59611	Tnon_mito	PDIA11|TMX|TXNDC|TXNDC1|Q9H3N1	ENSG00000139921
ANKRD27	Ankyrin repeat domain-containing protein 27 OS=Homo sapiens GN=ANKRD27 PE=1 SV=2	1	1	1								76000000					0	76000000					76000000	0	100		6.64386	1	TRUE	FALSE	FALSE	0	411	0	Tnon_mito	VARP|Q96NW4	ENSG00000105186
IGF2R	Cation-independent mannose-6-phosphate receptor OS=Homo sapiens GN=IGF2R PE=1 SV=3	6	6	21	15000000	17000000			11000000		11000000	9700000	7000000	9700000	11000000	11000000	16000000	1.00571e+07	0.628571	0.0491283	1.30867	9675000	1.05667e+07	0.604688	0.660417	-0.725738	-0.598552	7	TRUE	TRUE	TRUE	20	411	4.86618	Tnon_mito	CD222|CIMPR|M6P-R|MPR1|MPRI|P11717	ENSG00000197081
KRT13	Keratin, type I cytoskeletal 13 OS=Homo sapiens GN=KRT13 PE=1 SV=4	2	11	145			6600000						13000000	17000000			6600000	15000000	2.27273			15000000		2.27273	0	1.18442		2	TRUE	TRUE	TRUE	235	411	57.1776	Tnon_mito	CK13|K13|P13646	ENSG00000171401
KRT17	SWISS-PROT:Q04695 Tax_Id=9606 Gene_Symbol=KRT17 Keratin, type I cytoskeletal 17	7	18	155			25000000	27000000			43000000	34000000	26000000	24000000		32000000	26000000	31800000	1.22308	0.163346	0.786891	2.73333e+07	38500000	1.05128	1.48077	0.0721498	0.566347	5	FALSE	TRUE	TRUE	248	411	60.3406	Tnon_mito	K17|PC|PC2|PCHC1|Q04695	ENSG00000128422
TRAPPC3	Trafficking protein particle complex subunit 3 OS=Homo sapiens GN=TRAPPC3 PE=1 SV=1	2	2	2											5700000	14000000	0	9850000				9850000		100	0	6.64386		2	TRUE	FALSE	FALSE	10	411	2.43309	Tnon_mito	BET3|O43617	ENSG00000054116
BNIP1	Isoform 3 of Vesicle transport protein SEC20 OS=Homo sapiens GN=BNIP1	1	1	6	16000000	17000000				11000000							16500000	11000000	0.666667				11000000	0	0.666667		-0.584963	1	TRUE	FALSE	TRUE	1	411	0.243309	Tpossible_mito	NIP1|SEC20|TRG-8|Q12981	ENSG00000113734
PFAS	Phosphoribosylformylglycinamidine synthase OS=Homo sapiens GN=PFAS PE=1 SV=4	1	1	1												5800000	0	5800000				5800000		100	0	6.64386		1	TRUE	FALSE	FALSE	40	411	9.73236	Tnon_mito	FGAMS|FGARAT|PURL|O15067	ENSG00000178921
STAU1	Double-stranded RNA-binding protein Staufen homolog 1 OS=Homo sapiens GN=STAU1 PE=1 SV=2	11	11	89	75000000	71000000	30000000	35000000	31000000	35000000	43000000	47000000	32000000	39000000	53000000	49000000	52750000	41125000	0.779621	0.400961	0.396897	43250000	39000000	0.819905	0.739336	-0.286471	-0.435697	8	FALSE	TRUE	TRUE	58	411	14.1119	Tnon_mito	STAU|O95793	ENSG00000124214
YARS	Tyrosine--tRNA ligase, cytoplasmic OS=Homo sapiens GN=YARS PE=1 SV=4	2	2	5			2200000000						980000000		1900000000		2200000000	1440000000	0.654545			1440000000		0.654545	0	-0.611435		2	TRUE	FALSE	TRUE	71	411	17.2749	Tnon_mito	CMTDIC|TYRRS|YRS|YTS|P54577	ENSG00000134684
EIF3I	Eukaryotic translation initiation factor 3 subunit I OS=Homo sapiens GN=EIF3I PE=1 SV=1	19	19	335	670000000	670000000	380000000	460000000	250000000	230000000	280000000	280000000	190000000	230000000	310000000	280000000	545000000	256250000	0.470183	0.027727	1.5571	252500000	260000000	0.463303	0.477064	-1.10997	-1.06774	8	TRUE	TRUE	TRUE	128	411	31.1436	Tnon_mito	EIF3S2|PRO2242|TRIP-1|TRIP1|eIF3-beta|eIF3-p36|Q13347	ENSG00000084623
USP10	Isoform 2 of Ubiquitin carboxyl-terminal hydrolase 10 OS=Homo sapiens GN=USP10	6	6	18	45000000	28000000	26000000		27000000		48000000	25000000	9700000	34000000	60000000	18000000	33000000	3.16714e+07	0.95974	0.886019	0.0525568	30425000	3.33333e+07	0.92197	1.0101	-0.117209	0.0144996	7	FALSE	TRUE	TRUE	35	411	8.51582	Tnon_mito	UBPO|Q14694	ENSG00000103194
STUB1	E3 ubiquitin-protein ligase CHIP OS=Homo sapiens GN=STUB1 PE=1 SV=2	1	1	1				6400000									6400000	0	0					0	0			0	TRUE	FALSE	FALSE	62	411	15.0852	Tnon_mito	CHIP|HSPABP2|NY-CO-7|SDCCAG7|UBOX1|Q9UNE7	ENSG00000103266
SUPT16H	FACT complex subunit SPT16 OS=Homo sapiens GN=SUPT16H PE=1 SV=1	8	8	36	27000000	30000000	33000000	40000000	12000000	18000000		11000000	10000000	16000000	14000000	19000000	32500000	1.42857e+07	0.43956	0.00303593	2.51771	14750000	1.36667e+07	0.453846	0.420513	-1.13972	-1.24978	7	TRUE	TRUE	TRUE	76	411	18.4915	Tnon_mito	CDC68|FACTP140|SPT16/CDC68|Q9Y5B9	ENSG00000092201
GEMIN5	Gem-associated protein 5 OS=Homo sapiens GN=GEMIN5 PE=1 SV=3	12	12	41	24000000	32000000	14000000	12000000	5300000	8900000	11000000		9600000	15000000	16000000	21000000	20500000	12400000	0.604878	0.181986	0.739962	15400000	8400000	0.75122	0.409756	-0.412694	-1.28716	7	FALSE	TRUE	TRUE	44	411	10.7056	Tnon_mito	GEMIN-5|Q8TEQ6	ENSG00000082516
PHGDH	D-3-phosphoglycerate dehydrogenase OS=Homo sapiens GN=PHGDH PE=1 SV=4	8	8	35	29000000	32000000	25000000	23000000	11000000	10000000	9100000		12000000	17000000	41000000	48000000	27250000	2.11571e+07	0.776409	0.377005	0.423653	29500000	1.00333e+07	1.08257	0.368196	0.114459	-1.44146	7	FALSE	TRUE	TRUE	152	411	36.983	Tnon_mito	3-PGDH|3PGDH|HEL-S-113|PDG|PGAD|PGD|PGDH|SERA|O43175	ENSG00000092621
IMP3	U3 small nucleolar ribonucleoprotein protein IMP3 OS=Homo sapiens GN=IMP3 PE=1 SV=1	2	2	5			65000000	73000000			16000000					13000000	69000000	14500000	0.210145	0.0266093	1.57497	13000000	16000000	0.188406	0.231884	-2.40808	-2.10852	2	TRUE	FALSE	TRUE	16	411	3.89294	Tpossible_mito	BRMS2|C15orf12|MRPS4|Q9NV31	ENSG00000177971
PNO1	RNA-binding protein PNO1 OS=Homo sapiens GN=PNO1 PE=1 SV=1	6	6	28	18000000	23000000	16000000	23000000	3900000	4500000			3300000		13000000	6900000	20000000	6320000	0.316	0.00103799	2.98381	7.73333e+06	4200000	0.386667	0.21	-1.37084	-2.25154	5	TRUE	TRUE	TRUE	17	411	4.13625	Tnon_mito	KHRBP1|RRP20|Q9NRX1	ENSG00000115946
RANBP10	Ran-binding protein 10 OS=Homo sapiens GN=RANBP10 PE=4 SV=1	1	1	4		13000000	9800000	12000000								6000000	11600000	6000000	0.517241			6000000		0.517241	0	-0.95109		1	TRUE	FALSE	FALSE	12	411	2.91971	Tnon_mito	Q6VN20	ENSG00000141084
WDR26	WD repeat-containing protein 26 OS=Homo sapiens GN=WDR26 PE=1 SV=3	5	5	14	28000000		13000000	14000000							30000000		1.83333e+07	30000000	1.63636			30000000		1.63636	0	0.710493		1	TRUE	TRUE	TRUE	28	411	6.81265	Tnon_mito	CDW2|GID7|MIP2|Q9H7D7	ENSG00000162923
SH3BGRL	SH3 domain-binding glutamic acid-rich-like protein OS=Homo sapiens GN=SH3BGRL PE=1 SV=1	1	1	2											6800000	7000000	0	6900000				6900000		100	0	6.64386		2	TRUE	FALSE	FALSE	1	411	0.243309	Tnon_mito	HEL-S-115|SH3BGR|O75368	ENSG00000131171
NPC2	Epididymal secretory protein E1 (Fragment) OS=Homo sapiens GN=NPC2 PE=2 SV=1	3	3	8									8600000	11000000	22000000	25000000	0	16650000	100	0.0257572	1.5891	16650000		100	0	6.64386		4	TRUE	TRUE	TRUE	0	411	0	Tnon_mito	EDDM1|HE1|P61916	ENSG00000119655
CAMK2D	Calcium/calmodulin-dependent protein kinase type II subunit delta OS=Homo sapiens GN=CAMK2D PE=2 SV=1	1	1	3	12000000	14000000											13000000	0	0					0	0			0	TRUE	FALSE	FALSE	15	411	3.64964	Tnon_mito	CAMKD|Q13557	ENSG00000145349
FLOT2	Flotillin-2 OS=Homo sapiens GN=FLOT2 PE=2 SV=1	1	1	2	23000000										25000000		23000000	25000000	1.08696			25000000		1.08696	0	0.120294		1	TRUE	FALSE	FALSE	11	411	2.6764	Tnon_mito	ECS-1|ECS1|ESA|ESA1|M17S1|Q14254	ENSG00000132589
GNB1	Guanine nucleotide-binding protein G(I)/G(S)/G(T) subunit beta-1 OS=Homo sapiens GN=GNB1 PE=1 SV=3	3	5	24	35000000	17000000		10000000	27000000	21000000	34000000	19000000	20000000	20000000	40000000	15000000	2.06667e+07	24500000	1.18548	0.669323	0.174364	23750000	25250000	1.14919	1.22177	0.200622	0.288978	8	FALSE	TRUE	TRUE	59	411	14.3552	Tnon_mito	P62873	ENSG00000078369
KIF5B	Kinesin-1 heavy chain OS=Homo sapiens GN=KIF5B PE=1 SV=1	13	13	35	22000000	14000000	12000000	15000000	9700000		9700000		4200000	7500000	18000000	13000000	15750000	10350000	0.657143	0.105984	0.974759	10675000	9700000	0.677778	0.615873	-0.561116	-0.699295	6	FALSE	TRUE	TRUE	97	411	23.601	Tnon_mito	HEL-S-61|KINH|KNS|KNS1|UKHC|P33176	ENSG00000170759
MYH10	Isoform 4 of Myosin-10 OS=Homo sapiens GN=MYH10	44	51	280	100000000	62000000	43000000	30000000	22000000	13000000	21000000	13000000	32000000	19000000	65000000	31000000	58750000	27000000	0.459574	0.125262	0.902181	36750000	17250000	0.625532	0.293617	-0.676845	-1.76799	8	FALSE	TRUE	TRUE	166	411	40.3893	Tnon_mito	NMMHC-IIB|NMMHCB|P35580	ENSG00000133026
MYO6	Unconventional myosin-VI OS=Homo sapiens GN=MYO6 PE=1 SV=4	1	1	2			6700000	9700000									8200000	0	0					0	0			0	TRUE	FALSE	FALSE	42	411	10.219	Tnon_mito	DFNA22|DFNB37|Q9UM54	ENSG00000196586
PGD	6-phosphogluconate dehydrogenase, decarboxylating OS=Homo sapiens GN=PGD PE=1 SV=3	4	4	7			3800000								19000000	12000000	3800000	15500000	4.07895			15500000		4.07895	0	2.0282		2	TRUE	TRUE	TRUE	67	411	16.3017	Tnon_mito	6PGD|P52209	ENSG00000142657
RAN	GTP-binding nuclear protein Ran OS=Homo sapiens GN=RAN PE=4 SV=1	7	7	55	82000000	120000000	42000000	36000000	39000000		42000000	56000000	33000000	27000000	180000000	220000000	70000000	8.52857e+07	1.21837	0.680429	0.167217	115000000	4.56667e+07	1.64286	0.652381	0.716207	-0.616213	7	FALSE	TRUE	TRUE	154	411	37.4696	Tnon_mito	ARA24|Gsp1|TC4|P62826	ENSG00000132341
RPL27A	60S ribosomal protein L27a OS=Homo sapiens GN=RPL27A PE=1 SV=2	3	3	54	230000000	270000000	93000000	110000000	74000000	31000000	100000000	92000000	90000000	120000000	150000000	180000000	175750000	104625000	0.595306	0.205031	0.688181	135000000	74250000	0.768137	0.422475	-0.380565	-1.24306	8	FALSE	TRUE	TRUE	198	411	48.1752	Tnon_mito	L27A|P46776	ENSG00000166441
SRPRB	Signal recognition particle receptor subunit beta OS=Homo sapiens GN=SRPRB PE=1 SV=3	11	11	88	85000000	82000000	19000000	20000000	36000000	50000000	44000000	58000000	44000000	56000000	48000000	59000000	51500000	49375000	0.958738	0.916412	0.037909	51750000	47000000	1.00485	0.912621	0.00698643	-0.131912	8	FALSE	TRUE	TRUE	35	411	8.51582	Tnon_mito	APMCF1|Q9Y5M8	ENSG00000144867
EFHD2	EF-hand domain-containing protein D2 OS=Homo sapiens GN=EFHD2 PE=1 SV=1	1	1	1											4400000		0	4400000				4400000		100	0	6.64386		1	TRUE	FALSE	FALSE	31	411	7.54258	Tnon_mito	SWS1|Q96C19	ENSG00000142634
CSTF3	Cleavage stimulation factor subunit 3 OS=Homo sapiens GN=CSTF3 PE=1 SV=1	1	1	1									6500000				0	6500000				6500000		100	0	6.64386		1	TRUE	FALSE	FALSE	32	411	7.78589	Tnon_mito	CSTF-77|Q12996	ENSG00000176102
RCN1	Reticulocalbin-1 OS=Homo sapiens GN=RCN1 PE=1 SV=1	11	11	70	52000000	61000000		9200000	12000000	16000000	23000000	25000000	17000000	23000000	68000000	79000000	4.07333e+07	32875000	0.807079	0.694492	0.158333	46750000	19000000	1.14771	0.466448	0.198756	-1.10021	8	FALSE	TRUE	TRUE	54	411	13.1387	Tnon_mito	HEL-S-84|PIG20|RCAL|RCN|Q15293	ENSG00000049449
DUSP14	Dual specificity protein phosphatase 14 OS=Homo sapiens GN=DUSP14 PE=1 SV=1	1	1	1					23000000								0	23000000					23000000	0	100		6.64386	1	TRUE	FALSE	FALSE	4	411	0.973236	Tnon_mito	MKP-L|MKP6|O95147	ENSG00000161326
OLFML3	Isoform 3 of Olfactomedin-like protein 3 OS=Homo sapiens GN=OLFML3	1	1	1									3400000				0	3400000				3400000		100	0	6.64386		1	TRUE	FALSE	FALSE	0	411	0	Tnon_mito	HNOEL-iso|OLF44|Q9NRN5	ENSG00000116774
MANF	Mesencephalic astrocyte-derived neurotrophic factor OS=Homo sapiens GN=MANF PE=1 SV=3	2	2	5	18000000	20000000									21000000	22000000	19000000	21500000	1.13158	0.198727	0.701742	21500000		1.13158	0	0.178337		2	FALSE	FALSE	TRUE	15	411	3.64964	Tnon_mito	ARMET|ARP|P55145	ENSG00000145050
KIAA0391	Mitochondrial ribonuclease P protein 3 OS=Homo sapiens GN=KIAA0391 PE=1 SV=2	1	1	4					7400000		9900000			4100000	5800000			6800000		0.0117551	1.92978	4950000	8650000	100	100	6.64386	6.64386	4	TRUE	FALSE	FALSE	4	411	0.973236	Tmito	MRPP3|PRORP|O15091	ENSG00000100890
CIRBP	Cold-inducible RNA-binding protein OS=Homo sapiens GN=CIRBP PE=1 SV=1	4	4	138	270000000	250000000	160000000	170000000	200000000	260000000	240000000	240000000	200000000	240000000	190000000	200000000	212500000	221250000	1.04118	0.781458	0.107095	207500000	235000000	0.976471	1.10588	-0.0343515	0.145198	8	FALSE	TRUE	TRUE	107	411	26.0341	Tnon_mito	CIRP|Q14011	ENSG00000099622
FLII	Protein flightless-1 homolog OS=Homo sapiens GN=FLII PE=1 SV=2	2	2	2	16000000				20000000								16000000	20000000	1.25				20000000	0	1.25		0.321928	1	TRUE	FALSE	FALSE	36	411	8.75912	Tnon_mito	FLI|FLIL|Fli1|Q13045	ENSG00000177731
NRAS	GTPase NRas OS=Homo sapiens GN=NRAS PE=1 SV=1	1	1	1						12000000							0	12000000					12000000	0	100		6.64386	1	TRUE	FALSE	FALSE	10	411	2.43309	Tnon_mito	ALPS4|N-ras|NRAS1|NS6|P01111	ENSG00000213281
FOCAD	Focadhesin OS=Homo sapiens GN=FOCAD PE=1 SV=1	1	1	1			2000000										2000000	0	0					0	0			0	TRUE	FALSE	FALSE	2	411	0.486618	Tnon_mito	KIAA1797|Q5VW36	ENSG00000188352
KTN1	Kinectin OS=Homo sapiens GN=KTN1 PE=1 SV=1	14	14	33	38000000	29000000					8900000				23000000	19000000	33500000	1.69667e+07	0.506468	0.0893745	1.04879	21000000	8900000	0.626866	0.265672	-0.673772	-1.91228	3	FALSE	TRUE	TRUE	39	411	9.48905	Tnon_mito	CG1|KNT|MU-RMS-40.19|Q86UP2	ENSG00000126777
CORO7	Isoform 3 of Coronin-7 OS=Homo sapiens GN=CORO7	2	2	11	31000000				21000000	15000000	27000000		9300000	14000000	19000000	12000000	31000000	1.67571e+07	0.540553			13575000	21000000	0.437903	0.677419	-1.19132	-0.561879	7	TRUE	FALSE	TRUE	5	411	1.21655	Tnon_mito	0610011B16Rik|CRN7|POD1|P57737	ENSG00000262246
ATP5J2-PTCD1	Pentatricopeptide repeat-containing protein 1, mitochondrial OS=Homo sapiens GN=ATP5J2-PTCD1 PE=4 SV=1	2	2	4						2800000		2000000				9500000	0	4.76667e+06				9500000	2400000	100	100	6.64386	6.64386	3	TRUE	FALSE	FALSE				Tmito	B4DJ38	ENSG00000106246
DNMT1	Isoform 2 of DNA (cytosine-5)-methyltransferase 1 OS=Homo sapiens GN=DNMT1	2	2	11	9200000	17000000	4400000	5200000		8400000	6000000		5800000	7300000	11000000	11000000	8950000	8250000	0.921788	0.82985	0.0810002	8775000	7200000	0.980447	0.804469	-0.0284886	-0.313891	6	FALSE	FALSE	TRUE	42	411	10.219	Tnon_mito	ADCADN|AIM|CXXC9|DNMT|HSN1E|MCMT|P26358	ENSG00000130816
HNRNPL	Heterogeneous nuclear ribonucleoprotein L OS=Homo sapiens GN=HNRNPL PE=1 SV=2	12	12	55	89000000	91000000	38000000	44000000	14000000	18000000	19000000	20000000	9400000	21000000	17000000	24000000	65500000	17800000	0.271756	0.0428763	1.36778	17850000	17750000	0.272519	0.270992	-1.87557	-1.88368	8	TRUE	TRUE	TRUE	190	411	46.2287	Tnon_mito	HNRPL|hnRNP-L|P14866	ENSG00000104824
ADAP1	Arf-GAP with dual PH domain-containing protein 1 (Fragment) OS=Homo sapiens GN=ADAP1 PE=4 SV=1	2	2	4			21000000			20000000							21000000	20000000	0.952381				20000000	0	0.952381		-0.0703893	1	TRUE	FALSE	FALSE	0	411	0	Tnon_mito	CENTA1|GCS1L|p42IP4|O75689	ENSG00000105963
PSPC1	Paraspeckle component 1 OS=Homo sapiens GN=PSPC1 PE=1 SV=1	7	7	55	46000000	50000000	19000000	28000000	35000000	32000000	44000000	27000000	34000000	35000000	27000000	35000000	35750000	33625000	0.940559	0.795798	0.0991971	32750000	34500000	0.916084	0.965035	-0.126448	-0.0513469	8	FALSE	TRUE	TRUE	82	411	19.9513	Tnon_mito	PSP1|Q8WXF1	ENSG00000121390
DHX40	Probable ATP-dependent RNA helicase DHX40 OS=Homo sapiens GN=DHX40 PE=1 SV=2	1	1	1	9200000												9200000	0	0					0	0			0	TRUE	FALSE	FALSE	5	411	1.21655	Tnon_mito	DDX40|PAD|Q8IX18	ENSG00000108406
SSH2	Protein phosphatase Slingshot homolog 2 OS=Homo sapiens GN=SSH2 PE=2 SV=1	1	1	1		1100000											1100000	0	0					0	0			0	TRUE	FALSE	FALSE	1	411	0.243309	Tnon_mito	SSH-2|SSH-2L|Q76I76	ENSG00000141298
ACTC1	Actin, alpha cardiac muscle 1 OS=Homo sapiens GN=ACTC1 PE=1 SV=1	1	13	369	1500000000	1600000000	670000000	1000000000	290000000	250000000	320000000	450000000	280000000	340000000	480000000	700000000	1192500000	388750000	0.325996	0.0309573	1.50924	450000000	327500000	0.377358	0.274633	-1.40599	-1.86442	8	TRUE	TRUE	TRUE	354	411	86.1314	Tnon_mito	ACTC|ASD5|CMD1R|CMH11|LVNC4|P68032	ENSG00000159251
CPD	Carboxypeptidase D OS=Homo sapiens GN=CPD PE=1 SV=2	3	3	17	14000000	16000000			7300000	4400000	8700000	4500000	6400000	5300000	11000000	11000000	15000000	7325000	0.488333	0.00932373	2.03041	8425000	6225000	0.561667	0.415	-0.832214	-1.26882	8	TRUE	TRUE	TRUE	4	411	0.973236	Tnon_mito	GP180|O75976	ENSG00000108582
CSNK2A2	Casein kinase II subunit alpha' OS=Homo sapiens GN=CSNK2A2 PE=1 SV=1	1	1	1		16000000											16000000	0	0					0	0			0	TRUE	FALSE	FALSE	23	411	5.59611	Tnon_mito	CK2A2|CSNK2A1|P19784	ENSG00000070770
DSP	Desmoplakin OS=Homo sapiens GN=DSP PE=1 SV=3	27	27	73	35000000	46000000	38000000	43000000	68000000	73000000	7900000	7500000	11000000	14000000	20000000	30000000	40500000	28925000	0.714198	0.270141	0.56841	18750000	39100000	0.462963	0.965432	-1.11103	-0.0507533	8	FALSE	TRUE	TRUE	126	411	30.6569	Tpossible_mito	DP|DPI|DPII|P15924	ENSG00000096696
EIF4B	Eukaryotic translation initiation factor 4B (Fragment) OS=Homo sapiens GN=EIF4B PE=2 SV=1	1	12	353	11000000	9500000	13000000	12000000									11375000	0	0					0	0			0	TRUE	TRUE	TRUE	167	411	40.6326	Tnon_mito	EIF-4B|PRO1843|P23588	ENSG00000063046
EIF4B	Eukaryotic translation initiation factor 4B OS=Homo sapiens GN=EIF4B PE=2 SV=1	7	18	522	920000000	920000000	620000000	790000000	160000000	200000000	210000000	220000000	120000000	150000000	300000000	340000000	812500000	212500000	0.261538	0.0016036	2.7949	227500000	197500000	0.28	0.243077	-1.8365	-2.04052	8	TRUE	TRUE	TRUE	167	411	40.6326	Tnon_mito	EIF-4B|PRO1843|P23588	ENSG00000063046
CTTN	Src substrate cortactin OS=Homo sapiens GN=CTTN PE=1 SV=2	14	14	88	72000000	83000000	40000000	50000000	25000000	22000000	24000000	27000000	15000000	18000000	36000000	38000000	61250000	25625000	0.418367	0.0315198	1.50142	26750000	24500000	0.436735	0.4	-1.19517	-1.32193	8	TRUE	TRUE	TRUE	73	411	17.7616	Tnon_mito	EMS1|Q14247	ENSG00000085733
GRB2	Growth factor receptor-bound protein 2 OS=Homo sapiens GN=GRB2 PE=1 SV=1	1	1	2											8200000	10000000	0	9100000				9100000		100	0	6.64386		2	TRUE	FALSE	FALSE	7	411	1.70316	Tnon_mito	ASH|EGFRBP-GRB2|Grb3-3|MST084|MSTP084|NCKAP2|P62993	ENSG00000177885
LASP1	Isoform 2 of LIM and SH3 domain protein 1 OS=Homo sapiens GN=LASP1	1	1	1			8500000										8500000	0	0					0	0			0	TRUE	FALSE	FALSE	26	411	6.32603	Tnon_mito	Lasp-1|MLN50|Q14847	ENSG00000002834
PPID	Peptidyl-prolyl cis-trans isomerase D OS=Homo sapiens GN=PPID PE=1 SV=3	2	2	2												10000000	0	10000000				10000000		100	0	6.64386		1	TRUE	FALSE	FALSE	3	411	0.729927	Tpossible_mito	CYP-40|CYPD|Q08752	ENSG00000171497
PPP5C	Serine/threonine-protein phosphatase 5 OS=Homo sapiens GN=PPP5C PE=1 SV=1	1	1	1											15000000		0	15000000				15000000		100	0	6.64386		1	TRUE	FALSE	FALSE	17	411	4.13625	Tnon_mito	PP5|PPP5|PPT|P53041	ENSG00000011485
PRSS1	Trypsin-1 OS=Homo sapiens GN=PRSS1 PE=2 SV=1	1	1	1				13000000									13000000	0	0					0	0			0	TRUE	FALSE	FALSE	65	411	15.8151	Tnon_mito	TRP1|TRY1|TRY4|TRYP1|P07477	ENSG00000204983
PSMA1	Isoform Long of Proteasome subunit alpha type-1 OS=Homo sapiens GN=PSMA1	5	5	23	39000000	26000000	49000000	53000000				6500000	37000000	28000000	40000000	38000000	41750000	29900000	0.716168	0.213192	0.671228	35750000	6500000	0.856287	0.155689	-0.223833	-2.68326	5	FALSE	TRUE	TRUE	86	411	20.9246	Tnon_mito	HC2|HEL-S-275|NU|PROS30|P25786	ENSG00000129084
PSMA3	Proteasome subunit alpha type-3 OS=Homo sapiens GN=PSMA3 PE=1 SV=2	2	2	9		12000000	19000000	21000000					7200000	8300000	16000000	19000000	1.73333e+07	12625000	0.728365	0.290395	0.537011	12625000		0.728365	0	-0.457266		4	FALSE	FALSE	TRUE	78	411	18.9781	Tnon_mito	HC8|PSC3|P25788	ENSG00000100567
SDCBP	Syndecan binding protein (Syntenin), isoform CRA_a OS=Homo sapiens GN=SDCBP PE=4 SV=1	1	1	1									9100000				0	9100000				9100000		100	0	6.64386		1	TRUE	FALSE	FALSE	13	411	3.16302	Tnon_mito	MDA-9|ST1|SYCL|TACIP18|O00560	ENSG00000137575
SEL1L	Protein sel-1 homolog 1 OS=Homo sapiens GN=SEL1L PE=1 SV=3	2	2	2								2800000			6600000		0	4700000				6600000	2800000	100	100	6.64386	6.64386	2	TRUE	FALSE	FALSE	3	411	0.729927	Tnon_mito	PRO1063|SEL1-LIKE|SEL1L1|Q9UBV2	ENSG00000071537
SNRNP70	U1 small nuclear ribonucleoprotein 70 kDa OS=Homo sapiens GN=SNRNP70 PE=1 SV=2	8	8	46	31000000	44000000	19000000	15000000	21000000	18000000	22000000	36000000	14000000	24000000		10000000	27250000	2.07143e+07	0.760157	0.413758	0.383253	16000000	24250000	0.587156	0.889908	-0.768184	-0.168271	7	FALSE	TRUE	TRUE	108	411	26.2774	Tnon_mito	RNPU1Z|RPU1|SNRP70|Snp1|U1-70K|U170K|U1AP|U1RNP|P08621	ENSG00000104852
SNRPB2	U2 small nuclear ribonucleoprotein B'' OS=Homo sapiens GN=SNRPB2 PE=1 SV=1	3	5	34	75000000	62000000	89000000	52000000	33000000	49000000	45000000	53000000	36000000	27000000	45000000	42000000	69500000	41250000	0.593525	0.0313876	1.50324	37500000	45000000	0.539568	0.647482	-0.890122	-0.627088	8	TRUE	TRUE	TRUE	94	411	22.871	Tnon_mito	Msl1|P08579	ENSG00000125870
TRIM25	E3 ubiquitin/ISG15 ligase TRIM25 OS=Homo sapiens GN=TRIM25 PE=1 SV=2	4	4	17	18000000	20000000		6900000	6900000	10000000	8400000	10000000	7500000	10000000	14000000	13000000	1.49667e+07	9975000	0.666481	0.344638	0.462637	11125000	8825000	0.743318	0.589644	-0.427948	-0.762085	8	FALSE	TRUE	TRUE	29	411	7.05596	Tnon_mito	EFP|RNF147|Z147|ZNF147|Q14258	ENSG00000121060
ANP32A	Acidic leucine-rich nuclear phosphoprotein 32 family member A OS=Homo sapiens GN=ANP32A PE=1 SV=1	3	4	18	18000000	17000000									31000000	25000000	17500000	28000000	1.6	0.16898	0.772164	28000000		1.6	0	0.678072		2	FALSE	TRUE	TRUE	45	411	10.9489	Tnon_mito	C15orf1|HPPCn|I1PP2A|LANP|MAPM|PHAP1|PHAPI|PP32|P39687	ENSG00000140350
DNAH11	Dynein heavy chain 11, axonemal OS=Homo sapiens GN=DNAH11 PE=1 SV=3	1	1	1				26000000									26000000	0	0					0	0			0	TRUE	FALSE	FALSE				Tnon_mito	CILD7|DNAHBL|DNAHC11|DNHBL|DPL11|Q96DT5	ENSG00000105877
HUWE1	E3 ubiquitin-protein ligase HUWE1 OS=Homo sapiens GN=HUWE1 PE=1 SV=3	1	1	1				4600000									4600000	0	0					0	0			0	TRUE	FALSE	FALSE	74	411	18.0049	Tnon_mito	ARF-BP1|HECTH9|HSPC272|Ib772|LASU1|MULE|URE-B1|UREB1|Q7Z6Z7	ENSG00000086758
PGRMC2	Isoform 2 of Membrane-associated progesterone receptor component 2 OS=Homo sapiens GN=PGRMC2	3	4	19		21000000			14000000	15000000	16000000	18000000	9500000	21000000		17000000	21000000	1.57857e+07	0.751701			1.58333e+07	15750000	0.753968	0.75	-0.407424	-0.415037	7	TRUE	TRUE	TRUE	35	411	8.51582	Tnon_mito	DG6|PMBP|O15173	ENSG00000164040
RBM14	RNA-binding protein 14 OS=Homo sapiens GN=RBM14 PE=1 SV=2	12	12	100	40000000	41000000	24000000	26000000	27000000	32000000	36000000	37000000	23000000	35000000	23000000	29000000	32750000	30250000	0.923664	0.636638	0.196107	27500000	33000000	0.839695	1.00763	-0.252063	0.0109711	8	FALSE	TRUE	TRUE	52	411	12.6521	Tnon_mito	COAA|PSP2|SIP|SYTIP1|TMEM137|A0A0S2Z4Z0	ENSG00000239306
TCERG1	Transcription elongation regulator 1 OS=Homo sapiens GN=TCERG1 PE=1 SV=2	2	2	4	10000000	8900000										12000000	9450000	12000000	1.26984			12000000		1.26984	0	0.344648		1	TRUE	FALSE	FALSE	64	411	15.5718	Tnon_mito	CA150|TAF2S|Urn1|O14776	ENSG00000113649
SPEN	Msx2-interacting protein OS=Homo sapiens GN=SPEN PE=1 SV=1	1	1	2			190000000	270000000									230000000	0	0					0	0			0	TRUE	FALSE	FALSE	31	411	7.54258	Tnon_mito	HIAA0929|MINT|RBM15C|SHARP|Q96T58	ENSG00000065526
MGA	Isoform 4 of MAX gene-associated protein OS=Homo sapiens GN=MGA	2	2	4	12000000	15000000	11000000	13000000									12750000	0	0					0	0			0	TRUE	FALSE	FALSE	47	411	11.4355	Tnon_mito	MAD5|MXD5|Q8IWI9	ENSG00000174197
KIF4A	Chromosome-associated kinesin KIF4A OS=Homo sapiens GN=KIF4A PE=1 SV=3	7	7	21	10000000000	8700000	29000000000		3100000		3100000	4000000	17000000000	7500000	9300000000	4800000	13002900000	3.76036e+09	0.289194	0.392241	0.406447	6578075000	3400000	0.505893	0.00026148	-0.983096	-11.901	7	FALSE	TRUE	TRUE	35	411	8.51582	Tnon_mito	KIF4|KIF4G1|O95239	ENSG00000090889
DBNL	Isoform 3 of Drebrin-like protein OS=Homo sapiens GN=DBNL	1	1	2											12000000	12000000	0	12000000				12000000		100	0	6.64386		2	TRUE	FALSE	FALSE	37	411	9.00243	Tnon_mito	ABP1|HIP-55|HIP55|SH3P7|Q9UJU6	ENSG00000136279
NENF	Neudesin OS=Homo sapiens GN=NENF PE=1 SV=1	2	2	4	12000000	13000000									15000000		12500000	15000000	1.2			15000000		1.2	0	0.263034		1	TRUE	FALSE	FALSE	1	411	0.243309	Tnon_mito	CIR2|SCIRP10|SPUF|Q9UMX5	ENSG00000117691
ACTR2	Isoform 2 of Actin-related protein 2 OS=Homo sapiens GN=ACTR2	1	1	1				8300000									8300000	0	0					0	0			0	TRUE	FALSE	FALSE	51	411	12.4088	Tnon_mito	ARP2|P61160	ENSG00000138071
BAG2	BAG family molecular chaperone regulator 2 OS=Homo sapiens GN=BAG2 PE=1 SV=1	3	3	21	26000000	14000000	10000000	10000000			29000000				26000000	9900000	15000000	2.16333e+07	1.44222	0.405137	0.392398	17950000	29000000	1.19667	1.93333	0.259021	0.95109	3	FALSE	TRUE	TRUE	96	411	23.3577	Tnon_mito	BAG-2|dJ417I1.2|O95816	ENSG00000112208
EIF4E	Isoform 2 of Eukaryotic translation initiation factor 4E OS=Homo sapiens GN=EIF4E	7	7	118	200000000	230000000	140000000	180000000	170000000	220000000	160000000	200000000	170000000	210000000	160000000	170000000	187500000	182500000	0.973333	0.820032	0.086169	177500000	187500000	0.946667	1	-0.0790716	0	8	FALSE	TRUE	TRUE	19	411	4.62287	Tnon_mito	AUTS19|CBP|EIF4E1|EIF4EL1|EIF4F|P06730	ENSG00000151247
COPS5	COP9 signalosome complex subunit 5 OS=Homo sapiens GN=COPS5 PE=1 SV=4	1	1	6	8000000		5100000	5400000				4900000			7700000	8300000	6.16667e+06	6.96667e+06	1.12973	0.597459	0.223692	8000000	4900000	1.2973	0.794595	0.375509	-0.331709	3	FALSE	FALSE	TRUE	26	411	6.32603	Tnon_mito	CSN5|JAB1|MOV-34|SGN5|Q92905	ENSG00000121022
SRPR	Signal recognition particle receptor subunit alpha OS=Homo sapiens GN=SRPR PE=1 SV=2	3	3	21	21000000	17000000			9800000	13000000		17000000	14000000	19000000	9400000	24000000	19000000	1.51714e+07	0.798496	0.257228	0.589682	16600000	1.32667e+07	0.873684	0.698246	-0.194816	-0.518193	7	FALSE	TRUE	TRUE	25	411	6.08273	Tnon_mito	DP|Sralpha|P08240	ENSG00000182934
DOCK7	Dedicator of cytokinesis protein 7 OS=Homo sapiens GN=DOCK7 PE=1 SV=4	3	3	4	12000000	12000000		550000									8.18333e+06	0	0					0	0			0	TRUE	TRUE	FALSE	30	411	7.29927	Tnon_mito	ZIR2|Q96N67	ENSG00000116641
NAA10	N-alpha-acetyltransferase 10 OS=Homo sapiens GN=NAA10 PE=1 SV=1	7	7	21	42000000	31000000	12000000	13000000	36000000		41000000		19000000		33000000	30000000	24500000	31800000	1.29796	0.416344	0.380548	2.73333e+07	38500000	1.11565	1.57143	0.15788	0.652077	5	FALSE	TRUE	TRUE	29	411	7.05596	Tnon_mito	ARD1|ARD1A|ARD1P|DXS707|MCOPS1|NATD|TE2|P41227	ENSG00000102030
LSM1	U6 snRNA-associated Sm-like protein LSm1 OS=Homo sapiens GN=LSM1 PE=1 SV=1	1	1	3	22000000		8800000				26000000						15400000	26000000	1.68831				26000000	0	1.68831		0.755581	1	TRUE	FALSE	FALSE	4	411	0.973236	Tnon_mito	CASM|YJL124C|O15116	ENSG00000175324
GEMIN7	Gem-associated protein 7 OS=Homo sapiens GN=GEMIN7 PE=1 SV=1	2	2	4		5600000	3000000	10000000									6200000	0	0					0	0			0	TRUE	FALSE	FALSE	0	411	0	Tnon_mito	SIP3|Q9H840	ENSG00000142252
KRT19	SWISS-PROT:P19001 Tax_Id=10090 Gene_Symbol=Krt19 Keratin, type I cytoskeletal 19	1	8	66												31000000	0	31000000				31000000		100	0	6.64386		1	TRUE	TRUE	TRUE	247	411	60.0973	Tnon_mito	CK19|K19|K1CS|P08727	ENSG00000171345
RPL35A	60S ribosomal protein L35a OS=Homo sapiens GN=RPL35A PE=1 SV=2	3	3	39	93000000	140000000	11000000	48000000	38000000	18000000	79000000	50000000	89000000	69000000	23000000	120000000	73000000	60750000	0.832192	0.707885	0.150037	75250000	46250000	1.03082	0.633562	0.0437951	-0.658443	8	FALSE	TRUE	TRUE	108	411	26.2774	Tmito	DBA5|L35A|P18077	ENSG00000182899
ARPC5L	Actin-related protein 2/3 complex subunit 5-like protein OS=Homo sapiens GN=ARPC5L PE=1 SV=1	2	2	4	20000000		11000000	11000000									14000000	0	0					0	0			0	TRUE	FALSE	FALSE	3	411	0.729927	Tnon_mito	ARC16-2|Q9BPX5	ENSG00000136950
SEPT7	Septin-7 OS=Homo sapiens GN=SEPT7 PE=1 SV=2	8	9	79	62000000	63000000	15000000	20000000	13000000	15000000	26000000	21000000	18000000	29000000	54000000	48000000	40000000	28000000	0.7	0.442031	0.354547	37250000	18750000	0.93125	0.46875	-0.10276	-1.09311	8	FALSE	TRUE	TRUE	70	411	17.0316	Tnon_mito	CDC10|CDC3|NBLA02942|SEPT7A|Q16181	ENSG00000122545
MLLT4	Isoform 5 of Afadin OS=Homo sapiens GN=MLLT4	3	3	6	11000000	12000000						4400000			7700000	8700000	11500000	6.93333e+06	0.602899	0.059302	1.22693	8200000	4400000	0.713043	0.382609	-0.487938	-1.38606	3	FALSE	TRUE	TRUE	25	411	6.08273	Tnon_mito	AF6|RP3-431P23.3|P55196	ENSG00000130396
NCL	Nucleolin OS=Homo sapiens GN=NCL PE=1 SV=3	16	16	432	630000000	800000000	450000000	550000000	260000000	350000000	340000000	410000000	360000000	390000000	500000000	560000000	607500000	396250000	0.652263	0.056067	1.25129	452500000	340000000	0.744856	0.559671	-0.424967	-0.83735	8	FALSE	TRUE	TRUE	261	411	63.5036	Tnon_mito	C23|P19338	ENSG00000115053
PRKCSH	Glucosidase 2 subunit beta OS=Homo sapiens GN=PRKCSH PE=2 SV=1	14	14	254	250000000	210000000	89000000	100000000	120000000	140000000	190000000	170000000	110000000	110000000	260000000	220000000	162250000	165000000	1.01695	0.95342	0.0207158	175000000	155000000	1.07858	0.955316	0.109136	-0.0659503	8	FALSE	TRUE	TRUE	75	411	18.2482	Tnon_mito	AGE-R2|G19P1|PCLD|PKCSH|PLD1|P14314	ENSG00000130175
ST13	Hsc70-interacting protein OS=Homo sapiens GN=ST13 PE=1 SV=2	6	6	45	64000000	69000000	28000000	36000000	31000000	43000000	30000000	32000000	29000000	42000000	75000000	64000000	49250000	43250000	0.878173	0.632933	0.198642	52500000	34000000	1.06599	0.690355	0.0921937	-0.534589	8	FALSE	TRUE	TRUE	83	411	20.1946	Tnon_mito	AAG2|FAM10A1|FAM10A4|HIP|HOP|HSPABP|HSPABP1|P48|PRO0786|SNC6|P50502	ENSG00000100380
ERLIN2	Erlin-2 OS=Homo sapiens GN=ERLIN2 PE=1 SV=1	1	3	15											16000000	20000000	0	18000000				18000000		100	0	6.64386		2	TRUE	TRUE	TRUE	45	411	10.9489	Tnon_mito	C8orf2|Erlin-2|NET32|SPFH2|SPG18|O94905	ENSG00000147475
MACF1	Microtubule-actin cross-linking factor 1, isoforms 1/2/3/5 OS=Homo sapiens GN=MACF1 PE=2 SV=1	1	1	2	7500000	8500000											8000000	0	0					0	0			0	TRUE	FALSE	FALSE	39	411	9.48905	Tnon_mito	ABP620|ACF7|MACF|OFC4|Q9UPN3	ENSG00000127603
AHNAK	Neuroblast differentiation-associated protein AHNAK OS=Homo sapiens GN=AHNAK PE=1 SV=2	2	2	3	18000000										16000000		18000000	16000000	0.888889			16000000		0.888889	0	-0.169925		1	TRUE	FALSE	FALSE	62	411	15.0852	Tnon_mito	AHNAKRS|Q09666	ENSG00000124942
APRT	Adenine phosphoribosyltransferase OS=Homo sapiens GN=APRT PE=1 SV=2	1	1	2											14000000	12000000	0	13000000				13000000		100	0	6.64386		2	TRUE	FALSE	FALSE	25	411	6.08273	Tnon_mito	AMP|APRTD|P07741	ENSG00000198931
FLNA	Filamin-A OS=Homo sapiens GN=FLNA PE=1 SV=4	83	87	800	170000000	180000000	110000000	140000000	47000000	58000000	56000000	66000000	46000000	60000000	88000000	97000000	150000000	64750000	0.431667	0.0072823	2.13773	72750000	56750000	0.485	0.378333	-1.04394	-1.40227	8	TRUE	TRUE	TRUE	226	411	54.9878	Tnon_mito	ABP-280|ABPX|CSBS|CVD1|FLN|FLN-A|FLN1|FMD|MNS|NHBP|OPD|OPD1|OPD2|XLVD|XMVD|P21333	ENSG00000196924
HEXB	Beta-hexosaminidase subunit beta OS=Homo sapiens GN=HEXB PE=1 SV=3	1	1	1												20000000	0	20000000				20000000		100	0	6.64386		1	TRUE	FALSE	FALSE	7	411	1.70316	Tnon_mito	ENC-1AS|HEL-248|P07686	ENSG00000049860
LYZ	Lysozyme C OS=Homo sapiens GN=LYZ PE=1 SV=1	2	2	6									32000000	40000000			0	36000000				36000000		100	0	6.64386		2	TRUE	FALSE	TRUE	58	411	14.1119	Tnon_mito	LZM|P61626	ENSG00000090382
TPM4	Tropomyosin alpha-4 chain OS=Homo sapiens GN=TPM4 PE=1 SV=3	4	5	32	24000000	31000000	12000000	15000000		13000000	11000000	6400000	7900000	12000000	16000000	22000000	20500000	1.26143e+07	0.615331	0.168094	0.774447	14475000	1.01333e+07	0.706098	0.494309	-0.502061	-1.01652	7	FALSE	TRUE	TRUE	127	411	30.9002	Tnon_mito	HEL-S-108|P67936	ENSG00000167460
SEC61B	Protein transport protein Sec61 subunit beta OS=Homo sapiens GN=SEC61B PE=1 SV=2	2	2	27	60000000	91000000	15000000	18000000	37000000	45000000	50000000	55000000	33000000	44000000	63000000	66000000	46000000	49125000	1.06793	0.876612	0.0571925	51500000	46750000	1.11957	1.0163	0.162939	0.0233325	8	FALSE	FALSE	TRUE	35	411	8.51582	Tnon_mito	P60468	ENSG00000106803
SEC61G	Protein transport protein Sec61 subunit gamma OS=Homo sapiens GN=SEC61G PE=1 SV=1	1	1	3	20000000						15000000			10000000			20000000	12500000	0.625			10000000	15000000	0.5	0.75	-1	-0.415037	2	TRUE	FALSE	FALSE	2	411	0.486618	Tnon_mito	SSS1|P60059	ENSG00000132432
ATP1A2	Sodium/potassium-transporting ATPase subunit alpha-2 OS=Homo sapiens GN=ATP1A2 PE=1 SV=1	1	6	57	19000000						11000000						19000000	11000000	0.578947				11000000	0	0.578947		-0.788496	1	TRUE	TRUE	TRUE	94	411	22.871	Tnon_mito	FHM2|MHP2|P50993	ENSG00000018625
DPY30	Protein dpy-30 homolog OS=Homo sapiens GN=DPY30 PE=1 SV=1	3	3	10	18000000	20000000	14000000	9200000	23000000			17000000	26000000	13000000	18000000		15300000	19400000	1.26797	0.256565	0.590803	19000000	20000000	1.24183	1.30719	0.312468	0.386468	5	FALSE	TRUE	TRUE	43	411	10.4623	Tnon_mito	Cps25|HDPY-30|Saf19|Q9C005	ENSG00000162961
TRIP4	Activating signal cointegrator 1 OS=Homo sapiens GN=TRIP4 PE=1 SV=4	3	3	5	34000000	20000000		14000000									2.26667e+07	0	0					0	0			0	TRUE	TRUE	TRUE	2	411	0.486618	Tnon_mito	ASC-1|ASC1|HsT17391|Q15650	ENSG00000103671
MCM4	DNA replication licensing factor MCM4 OS=Homo sapiens GN=MCM4 PE=1 SV=5	8	8	27	13000000	14000000	23000000	18000000						5200000	13000000	12000000	17000000	1.00667e+07	0.592157	0.0971309	1.01264	1.00667e+07		0.592157	0	-0.755949		3	FALSE	TRUE	TRUE	113	411	27.4939	Tnon_mito	CDC21|CDC54|NKCD|NKGCD|P1-CDC21|hCdc21|P33991	ENSG00000104738
PFKFB3	Isoform 4 of 6-phosphofructo-2-kinase/fructose-2,6-bisphosphatase 3 OS=Homo sapiens GN=PFKFB3	3	3	6	8300000		10000000	14000000									1.07667e+07	0	0					0	0			0	TRUE	TRUE	TRUE	12	411	2.91971	Tnon_mito	IPFK2|PFK2|Q16875	ENSG00000170525
AATK	Serine/threonine-protein kinase LMTK1 OS=Homo sapiens GN=AATK PE=1 SV=2	1	1	3	94000000						24000000	50000000					94000000	37000000	0.393617				37000000	0	0.393617		-1.34514	2	TRUE	FALSE	FALSE	0	411	0	Tpossible_mito	AATYK|AATYK1|LMR1|LMTK1|p35BP|Q6ZMQ8	ENSG00000181409
KHDRBS1	KH domain-containing, RNA-binding, signal transduction-associated protein 1 OS=Homo sapiens GN=KHDRBS1 PE=1 SV=1	5	5	43	80000000	95000000	30000000	36000000	26000000	17000000	32000000	40000000	40000000	33000000	39000000	40000000	60250000	33375000	0.553942	0.192832	0.714822	38000000	28750000	0.630705	0.477178	-0.664962	-1.0674	8	FALSE	TRUE	TRUE	138	411	33.5766	Tnon_mito	Sam68|p62|p68|Q07666	ENSG00000121774
SRSF10	Serine/arginine-rich splicing factor 10 OS=Homo sapiens GN=SRSF10 PE=1 SV=1	1	1	3				4600000				7400000		4900000			4600000	6150000	1.33696			4900000	7400000	1.06522	1.6087	0.0911479	0.685891	2	TRUE	FALSE	FALSE	71	411	17.2749	Tnon_mito	FUSIP1|FUSIP2|NSSR|SFRS13|SFRS13A|SRp38|SRrp40|TASR|TASR1|TASR2|O75494	ENSG00000188529
KIF2C	Kinesin-like protein KIF2C OS=Homo sapiens GN=KIF2C PE=1 SV=2	2	2	3	5200000	9600000							4600000				7400000	4600000	0.621622			4600000		0.621622	0	-0.685891		1	TRUE	FALSE	FALSE	23	411	5.59611	Tnon_mito	CT139|KNSL6|MCAK|Q99661	ENSG00000142945
PRPF6	Pre-mRNA-processing factor 6 OS=Homo sapiens GN=PRPF6 PE=1 SV=1	4	4	10	13000000	13000000	13000000	11000000						5700000			12500000	5700000	0.456			5700000		0.456	0	-1.13289		1	TRUE	TRUE	TRUE	92	411	22.3844	Tpossible_mito	ANT-1|ANT1|C20orf14|Prp6|RP60|SNRNP102|TOM|U5-102K|hPrp6|O94906	ENSG00000101161
TRA2A	Transformer-2 protein homolog alpha OS=Homo sapiens GN=TRA2A PE=1 SV=1	1	1	1		7900000											7900000	0	0					0	0			0	TRUE	FALSE	FALSE	64	411	15.5718	Tnon_mito	AWMS1|HSU53209|Q13595	ENSG00000164548
SF3B6	Splicing factor 3B subunit 6 OS=Homo sapiens GN=SF3B6 PE=1 SV=1	6	6	46	50000000	65000000	33000000	38000000		15000000	15000000	17000000	16000000	16000000	26000000	31000000	46500000	1.94286e+07	0.417819	0.025917	1.58642	22250000	1.56667e+07	0.478495	0.336918	-1.06343	-1.56953	7	TRUE	TRUE	TRUE				Tnon_mito	HSPC175|Ht006|P14|SAP14|SAP14a|SF3B14|SF3B14a|Q9Y3B4	ENSG00000115128
ALKBH5	RNA demethylase ALKBH5 OS=Homo sapiens GN=ALKBH5 PE=1 SV=2	10	10	82	34000000	31000000	20000000	16000000	16000000	26000000	17000000	24000000	17000000	22000000	19000000	28000000	25250000	21125000	0.836634	0.422127	0.374556	21500000	20750000	0.851485	0.821782	-0.231947	-0.283172	8	FALSE	TRUE	TRUE	12	411	2.91971	Tnon_mito	ABH5|OFOXD|OFOXD1|Q6P6C2	ENSG00000091542
RBM25	RNA-binding protein 25 OS=Homo sapiens GN=RBM25 PE=1 SV=3	2	2	6	16000000	16000000				6300000				6400000	3000000	9500000	16000000	6300000	0.39375	0.00529074	2.27648	6300000	6300000	0.39375	0.39375	-1.34465	-1.34465	4	TRUE	FALSE	TRUE	77	411	18.7348	Tnon_mito	NET52|RED120|RNPC7|S164|Snu71|fSAP94|P49756	ENSG00000119707
SLC35B2	Adenosine 3'-phospho 5'-phosphosulfate transporter 1 OS=Homo sapiens GN=SLC35B2 PE=1 SV=1	1	1	4	4900000	3000000									5300000	3200000	3950000	4250000	1.07595	0.852013	0.0695536	4250000		1.07595	0	0.10561		2	FALSE	FALSE	FALSE	4	411	0.973236	Tnon_mito	PAPST1|SLL|UGTrel4|Q8TB61	ENSG00000157593
PSMD8	26S proteasome non-ATPase regulatory subunit 8 OS=Homo sapiens GN=PSMD8 PE=1 SV=2	6	6	39	19000000	13000000	10000000	41000000	8800000	16000000	12000000	12000000	8700000	13000000	23000000	24000000	20750000	14687500	0.707831	0.459077	0.338115	17175000	12200000	0.827711	0.587952	-0.272801	-0.76623	8	FALSE	TRUE	TRUE	44	411	10.7056	Tnon_mito	HEL-S-91n|HIP6|HYPF|Nin1p|Rpn12|S14|p31|P48556	ENSG00000099341
PARG	Poly(ADP-ribose) glycohydrolase OS=Homo sapiens GN=PARG PE=1 SV=1	1	1	1			6000000										6000000	0	0					0	0			0	TRUE	FALSE	FALSE	7	411	1.70316	Tpossible_mito	PARG99	ENSG00000214982
MGRN1	E3 ubiquitin-protein ligase MGRN1 (Fragment) OS=Homo sapiens GN=MGRN1 PE=2 SV=1	1	1	1	20000000												20000000	0	0					0	0			0	TRUE	FALSE	FALSE	0	411	0	Tnon_mito	RNF156|O60291	ENSG00000102858
CHD4	Isoform 2 of Chromodomain-helicase-DNA-binding protein 4 OS=Homo sapiens GN=CHD4	2	3	3	9600000	12000000											10800000	0	0					0	0			0	TRUE	TRUE	FALSE	80	411	19.4647	Tnon_mito	Mi-2b|Mi2-BETA|Q14839	ENSG00000111642
DHX15	Putative pre-mRNA-splicing factor ATP-dependent RNA helicase DHX15 OS=Homo sapiens GN=DHX15 PE=1 SV=2	8	8	34	34000000	35000000	13000000	14000000			12000000		9700000	13000000	17000000	16000000	24000000	13540000	0.564167	0.182777	0.738079	13925000	12000000	0.580208	0.5	-0.785357	-1	5	FALSE	TRUE	TRUE	168	411	40.8759	Tnon_mito	DBP1|DDX15|HRH2|PRP43|PRPF43|PrPp43p|O43143	ENSG00000109606
MARK2	Serine/threonine-protein kinase MARK2 OS=Homo sapiens GN=MARK2 PE=1 SV=2	4	4	15	14000000	16000000	13000000	19000000		8800000	8100000	11000000	8500000	10000000	12000000	12000000	15500000	1.00571e+07	0.648848	0.017444	1.75835	10625000	9300000	0.685484	0.6	-0.544805	-0.736966	7	TRUE	TRUE	TRUE	6	411	1.45985	Tnon_mito	EMK-1|EMK1|PAR-1|Par-1b|Par1b|Q7KZI7	ENSG00000072518
HNRNPU	Heterogeneous nuclear ribonucleoprotein U OS=Homo sapiens GN=HNRNPU PE=1 SV=6	29	29	600	930000000	1200000000	650000000	830000000	620000000	720000000	760000000	910000000	570000000	800000000	680000000	710000000	902500000	721250000	0.799169	0.214406	0.668763	690000000	752500000	0.764543	0.833795	-0.387331	-0.262235	8	FALSE	TRUE	TRUE	280	411	68.1265	Tnon_mito	HNRPU|SAF-A|U21.1|hnRNP U|Q00839	ENSG00000153187
SRSF2	Serine/arginine-rich splicing factor 2 OS=Homo sapiens GN=SRSF2 PE=1 SV=4	2	2	22	38000000	68000000	31000000	45000000	34000000		36000000	46000000	28000000	42000000	46000000	68000000	45500000	4.28571e+07	0.941915	0.789122	0.102856	46000000	3.86667e+07	1.01099	0.849817	0.0157673	-0.234776	7	FALSE	FALSE	TRUE	135	411	32.8467	Tnon_mito	PR264|SC-35|SC35|SFRS2|SFRS2A|SRp30b|Q01130	ENSG00000161547
RBM39	RNA-binding protein 39 OS=Homo sapiens GN=RBM39 PE=1 SV=2	6	6	27	22000000	29000000	12000000	15000000	10000000	13000000	12000000	13000000	12000000	15000000	13000000	16000000	19500000	13000000	0.666667	0.185003	0.732821	14000000	12000000	0.717949	0.615385	-0.478047	-0.70044	8	FALSE	TRUE	TRUE	163	411	39.6594	Tnon_mito	CAPER|CAPERalpha|FSAP59|HCC1|RNPC2|Q14498	ENSG00000131051
PPIE	Isoform 3 of Peptidyl-prolyl cis-trans isomerase E OS=Homo sapiens GN=PPIE	1	1	1	15000000												15000000	0	0					0	0			0	TRUE	FALSE	FALSE	10	411	2.43309	Tnon_mito	CYP-33|CYP33|Q9UNP9	ENSG00000084072
RNPS1	RNA-binding protein with serine-rich domain 1 OS=Homo sapiens GN=RNPS1 PE=1 SV=1	1	1	15	31000000	34000000	30000000	29000000	28000000	30000000	28000000	26000000	21000000	23000000	26000000	29000000	31000000	26375000	0.850806	0.015559	1.80802	24750000	28000000	0.798387	0.903226	-0.32484	-0.146841	8	TRUE	FALSE	TRUE	109	411	26.5207	Tnon_mito	E5.1|Q15287	ENSG00000205937
ATXN2L	Ataxin-2-like protein OS=Homo sapiens GN=ATXN2L PE=1 SV=2	13	13	81	51000000	57000000	24000000	35000000	27000000	43000000	42000000	29000000	35000000	45000000	44000000	50000000	41750000	39375000	0.943114	0.783094	0.106186	43500000	35250000	1.04192	0.844311	0.0592392	-0.244153	8	FALSE	TRUE	TRUE	127	411	30.9002	Tnon_mito	A2D|A2LG|A2LP|A2RP|Q8WWM7	ENSG00000168488
SMG1	Serine/threonine-protein kinase SMG1 OS=Homo sapiens GN=SMG1 PE=2 SV=1	1	1	1		2000000											2000000	0	0					0	0			0	TRUE	FALSE	FALSE	3	411	0.729927	Tnon_mito	61E3.4|ATX|LIP|Q96Q15	ENSG00000157106
SH3GLB1	Isoform 2 of Endophilin-B1 OS=Homo sapiens GN=SH3GLB1	1	1	4	8000000			3900000			5400000			3000000			5950000	4200000	0.705882	0.553411	0.256952	3000000	5400000	0.504202	0.907563	-0.987927	-0.13993	2	FALSE	FALSE	FALSE	5	411	1.21655	Tpossible_mito	Bif-1|PPP1R70|dJ612B15.2|Q9Y371	ENSG00000097033
LRCH2	Leucine-rich repeat and calponin homology domain-containing protein 2 OS=Homo sapiens GN=LRCH2 PE=2 SV=2	2	2	2	10000000	8900000											9450000	0	0					0	0			0	TRUE	FALSE	FALSE	5	411	1.21655	Tnon_mito	dA204F4.4|Q5VUJ6	ENSG00000130224
YTHDC2	Probable ATP-dependent RNA helicase YTHDC2 OS=Homo sapiens GN=YTHDC2 PE=1 SV=2	1	1	1												5500000	0	5500000				5500000		100	0	6.64386		1	TRUE	FALSE	FALSE	42	411	10.219	Tnon_mito	CAHL|Q9H6S0	ENSG00000047188
DHX57	Putative ATP-dependent RNA helicase DHX57 OS=Homo sapiens GN=DHX57 PE=1 SV=2	1	2	2	6100000												6100000	0	0					0	0			0	TRUE	FALSE	FALSE	14	411	3.40633	Tnon_mito	DDX57|Q6P158	ENSG00000163214
ARHGAP12	Rho GTPase-activating protein 12 OS=Homo sapiens GN=ARHGAP12 PE=1 SV=1	1	1	1	2300000												2300000	0	0					0	0			0	TRUE	FALSE	FALSE	0	411	0	Tnon_mito	Q8IWW6	ENSG00000165322
RTN4RL2	Reticulon 4 receptor-like 2, isoform CRA_a OS=Homo sapiens GN=RTN4RL2 PE=4 SV=1	1	1	6	30000000						13000000				66000000	78000000	30000000	5.23333e+07	1.74444			72000000	13000000	2.4	0.433333	1.26303	-1.20645	3	TRUE	FALSE	TRUE	0	411	0	Tnon_mito	NGRH1|NgR2|Q86UN3	ENSG00000186907
GOLPH3	Golgi phosphoprotein 3 OS=Homo sapiens GN=GOLPH3 PE=1 SV=1	1	1	1													0	0						0	0			0	TRUE	FALSE	FALSE	3	411	0.729927	Tmito	GOPP1|GPP34|MIDAS|Q9H4A6	ENSG00000113384
RB1CC1	RB1-inducible coiled-coil protein 1 OS=Homo sapiens GN=RB1CC1 PE=1 SV=3	17	18	37	17000000	21000000	14000000	20000000							4400000	7100000	18000000	5750000	0.319444	0.00648049	2.18839	5750000		0.319444	0	-1.64636		2	TRUE	TRUE	TRUE	1	411	0.243309	Tnon_mito	ATG17|CC1|FIP200|Q8TDY2	ENSG00000023287
NCAPD2	Condensin complex subunit 1 OS=Homo sapiens GN=NCAPD2 PE=1 SV=3	1	1	1				12000000									12000000	0	0					0	0			0	TRUE	FALSE	FALSE	52	411	12.6521	Tnon_mito	CAP-D2|CNAP1|hCAP-D2|Q15021	ENSG00000010292
MAP4	Microtubule-associated protein OS=Homo sapiens GN=MAP4 PE=2 SV=1	18	18	100	41000000	44000000	21000000	26000000	14000000	15000000	18000000	17000000	19000000	25000000	35000000	40000000	33000000	22875000	0.693182	0.180665	0.743125	29750000	16000000	0.901515	0.484848	-0.149576	-1.04439	8	FALSE	TRUE	TRUE	86	411	20.9246	Tnon_mito	P27816	ENSG00000047849
RPL21	60S ribosomal protein L21 OS=Homo sapiens GN=RPL21 PE=1 SV=2	4	4	35	210000000	270000000		110000000	140000000	190000000	160000000	90000000	93000000	130000000	180000000	380000000	1.96667e+08	170375000	0.866314	0.667389	0.175621	195750000	145000000	0.995339	0.737288	-0.00674015	-0.4397	8	FALSE	TRUE	TRUE	135	411	32.8467	Tnon_mito	L21|P46778	ENSG00000122026
CTAGE5	cTAGE family member 5 OS=Homo sapiens GN=CTAGE5 PE=4 SV=1	1	1	4		9700000					5000000				5600000	7500000	9700000	6.03333e+06	0.621993			6550000	5000000	0.675258	0.515464	-0.56649	-0.956057	3	TRUE	FALSE	FALSE	0	411	0	Tnon_mito	MEA6|MGEA|MGEA11|MGEA6|O15320	ENSG00000150527
SRP68	Signal recognition particle subunit SRP68 OS=Homo sapiens GN=SRP68 PE=1 SV=2	10	10	76	34000000	34000000	11000000	11000000	15000000	18000000	15000000	18000000	19000000	24000000	24000000	31000000	22500000	20500000	0.911111	0.788656	0.103112	24500000	16500000	1.08889	0.733333	0.122857	-0.447459	8	FALSE	TRUE	TRUE	71	411	17.2749	Tnon_mito	Q9UHB9	ENSG00000167881
ZNF598	Zinc finger protein 598 OS=Homo sapiens GN=ZNF598 PE=1 SV=1	1	1	3	10000000										7900000	8600000	10000000	8250000	0.825			8250000		0.825	0	-0.277534		2	TRUE	FALSE	FALSE	17	411	4.13625	Tnon_mito	Q86UK7	ENSG00000167962
SCARB2	Lysosome membrane protein 2 OS=Homo sapiens GN=SCARB2 PE=1 SV=2	3	3	19	11000000	9500000	6800000	5900000	6100000	8600000		12000000	9700000	11000000	12000000	15000000	8300000	1.06286e+07	1.28055	0.185508	0.731638	11925000	8900000	1.43675	1.07229	0.522806	0.100694	7	FALSE	TRUE	TRUE	0	411	0	Tnon_mito	AMRF|CD36L2|EPM4|HLGP85|LGP85|LIMP-2|LIMPII|SR-BII|Q14108	ENSG00000138760
GRN	Granulins OS=Homo sapiens GN=GRN PE=1 SV=2	5	5	21	14000000	25000000	12000000	16000000	8600000		21000000		16000000	16000000	19000000		16750000	16120000	0.962388	0.865466	0.0627501	17000000	14800000	1.01493	0.883582	0.0213737	-0.178564	5	FALSE	TRUE	TRUE	9	411	2.18978	Tpossible_mito	CLN11|GEP|GP88|PCDGF|PEPI|PGRN|P28799	ENSG00000030582
EIF1B	Eukaryotic translation initiation factor 1b OS=Homo sapiens GN=EIF1B PE=1 SV=2	3	7	99	48000000	30000000	6500000	14000000	11000000	18000000	39000000	13000000	8300000	19000000	28000000	16000000	24625000	19037500	0.773096	0.601972	0.220424	17825000	20250000	0.723858	0.822335	-0.466222	-0.282202	8	FALSE	TRUE	TRUE	19	411	4.62287	Tnon_mito	GC20|O60739	ENSG00000114784
MOV10	Putative helicase MOV-10 OS=Homo sapiens GN=MOV10 PE=1 SV=2	2	2	3	7900000	8900000											8400000	0	0					0	0			0	TRUE	FALSE	FALSE	44	411	10.7056	Tnon_mito	fSAP113|gb110|Q9HCE1	ENSG00000155363
NELFA	Negative elongation factor A (Fragment) OS=Homo sapiens GN=NELFA PE=2 SV=1	2	2	6	11000000	24000000		6500000			5500000				8300000	8900000	1.38333e+07	7.56667e+06	0.546988	0.354491	0.450394	8600000	5500000	0.621687	0.39759	-0.68574	-1.33065	3	FALSE	FALSE	TRUE	10	411	2.43309	Tnon_mito	NELF-A|WHSC2|Q9H3P2	ENSG00000185049
BZW1	Isoform 3 of Basic leucine zipper and W2 domain-containing protein 1 OS=Homo sapiens GN=BZW1	4	6	25	14000000	15000000	12000000	10000000	17000000	19000000	15000000	8500000	18000000	17000000	20000000	31000000	12750000	18187500	1.42647	0.0541681	1.26626	21500000	14875000	1.68627	1.16667	0.753839	0.222392	8	FALSE	TRUE	TRUE	12	411	2.91971	Tnon_mito	BZAP45|Nbla10236|Q7L1Q6	ENSG00000082153
NPM3	Nucleoplasmin-3 OS=Homo sapiens GN=NPM3 PE=1 SV=3	5	5	41	31000000	42000000	16000000	20000000	13000000	18000000	8100000	20000000	14000000	20000000	23000000	34000000	27250000	18762500	0.688532	0.253769	0.595561	22750000	14775000	0.834862	0.542202	-0.26039	-0.883098	8	FALSE	TRUE	TRUE	49	411	11.9221	Tnon_mito	PORMIN|TMEM123|O75607	ENSG00000107833
KRTAP11-1	Keratin-associated protein 11-1 OS=Homo sapiens GN=KRTAP11-1 PE=1 SV=1	1	1	9					220000000	48000000							0	134000000					134000000	0	100		6.64386	2	TRUE	FALSE	TRUE	2	411	0.486618	Tnon_mito	HACL-1|HACL1|KAP11.1|Q8IUC1	ENSG00000182591
FAM195B	HCG1818442, isoform CRA_a OS=Homo sapiens GN=FAM195B PE=4 SV=1	4	4	42	29000000	43000000	23000000	26000000	44000000	76000000	45000000	57000000	41000000	66000000	52000000	43000000	30250000	53000000	1.75207	0.00612415	2.21295	50500000	55500000	1.66942	1.83471	0.739348	0.875553	8	TRUE	TRUE	TRUE	47	411	11.4355	Tnon_mito	C9JLW8	ENSG00000225663
TMEM106B	Transmembrane protein 106B OS=Homo sapiens GN=TMEM106B PE=1 SV=2	1	1	1		4700000											4700000	0	0					0	0			0	TRUE	FALSE	FALSE	1	411	0.243309	Tnon_mito	Q9NUM4	ENSG00000106460
COPA	Isoform 2 of Coatomer subunit alpha OS=Homo sapiens GN=COPA	24	24	131	63000000	53000000	33000000	39000000	18000000	18000000	22000000	19000000	27000000	26000000	38000000	32000000	47000000	25000000	0.531915	0.0401486	1.39633	30750000	19250000	0.654255	0.409574	-0.612074	-1.2878	8	TRUE	TRUE	TRUE	86	411	20.9246	Tnon_mito	HEP-COP|P53621	ENSG00000122218
HDLBP	Vigilin OS=Homo sapiens GN=HDLBP PE=1 SV=2	24	24	147	64000000	66000000	17000000	26000000	25000000	24000000	23000000	32000000	33000000	32000000	46000000	48000000	43250000	32875000	0.760116	0.480714	0.318113	39750000	26000000	0.919075	0.601156	-0.121745	-0.734189	8	FALSE	TRUE	TRUE	71	411	17.2749	Tnon_mito	HBP|PRO2900|VGL|Q00341	ENSG00000115677
NUCB1	Nucleobindin-1 OS=Homo sapiens GN=NUCB1 PE=1 SV=4	7	7	33	28000000	16000000		4800000	11000000	6500000	13000000	8600000	5100000	6400000	27000000	13000000	1.62667e+07	11325000	0.696209	0.546282	0.262583	12875000	9775000	0.791496	0.600922	-0.337346	-0.73475	8	FALSE	TRUE	TRUE	11	411	2.6764	Tnon_mito	CALNUC|NUC|Q02818	ENSG00000104805
NUCB2	Nucleobindin-2 OS=Homo sapiens GN=NUCB2 PE=1 SV=2	1	1	2									13000000		32000000		0	22500000				22500000		100	0	6.64386		2	TRUE	FALSE	FALSE	12	411	2.91971	Tmito	HEL-S-109|NEFA|P80303	ENSG00000070081
PCBP2	Isoform 5 of Poly(rC)-binding protein 2 OS=Homo sapiens GN=PCBP2	8	11	172	180000000	200000000	55000000	42000000	98000000	140000000	73000000	120000000	99000000	140000000	150000000	120000000	119250000	117500000	0.985325	0.969273	0.0135537	127250000	107750000	1.06709	0.903564	0.0936764	-0.146301	8	FALSE	TRUE	TRUE	189	411	45.9854	Tnon_mito	HNRNPE2|HNRPE2|hnRNP-E2|Q15366	ENSG00000197111
PTBP1	Isoform 3 of Polypyrimidine tract-binding protein 1 OS=Homo sapiens GN=PTBP1	14	14	249	250000000	150000000	49000000	110000000	210000000	130000000	200000000	120000000	96000000	150000000	270000000	130000000	139750000	163250000	1.16816	0.640332	0.193595	161500000	165000000	1.15564	1.18068	0.208686	0.239618	8	FALSE	TRUE	TRUE	172	411	41.8491	Tnon_mito	HNRNP-I|HNRNPI|HNRPI|PTB|PTB-1|PTB-T|PTB2|PTB3|PTB4|pPTB|P26599	ENSG00000011304
RPL4	60S ribosomal protein L4 OS=Homo sapiens GN=RPL4 PE=1 SV=5	15	15	201	350000000	320000000	170000000	170000000	130000000	150000000	140000000	130000000	140000000	180000000	240000000	210000000	252500000	165000000	0.653465	0.164869	0.78286	192500000	137500000	0.762376	0.544554	-0.391425	-0.876852	8	FALSE	TRUE	TRUE	197	411	47.9319	Tnon_mito	L4|P36578	ENSG00000174444
STIM1	Stromal interaction molecule 1 OS=Homo sapiens GN=STIM1 PE=1 SV=3	1	1	3					3100000			4100000		3000000			0	3400000				3000000	3600000	100	100	6.64386	6.64386	3	TRUE	FALSE	FALSE	2	411	0.486618	Tnon_mito	D11S4896E|GOK|IMD10|TAM|Q13586	ENSG00000167323
FXR1	Fragile X mental retardation syndrome-related protein 1 OS=Homo sapiens GN=FXR1 PE=1 SV=3	7	9	41	27000000	27000000	7200000		4900000	18000000	11000000	11000000	8400000	17000000	15000000	18000000	20400000	12912500	0.632966	0.374668	0.426353	14600000	11225000	0.715686	0.550245	-0.482601	-0.861854	8	FALSE	TRUE	TRUE	46	411	11.1922	Tnon_mito	FXR1P|P51114	ENSG00000114416
COPB2	Coatomer subunit beta' OS=Homo sapiens GN=COPB2 PE=1 SV=2	19	19	105	43000000	45000000	32000000	39000000	17000000	25000000	20000000	26000000	21000000	28000000	46000000	51000000	39750000	29250000	0.735849	0.0737718	1.13211	36500000	22000000	0.918239	0.553459	-0.123058	-0.853451	8	FALSE	TRUE	TRUE	79	411	19.2214	Tnon_mito	beta'-COP|P35606	ENSG00000184432
SLC9A3R1	Na(+)/H(+) exchange regulatory cofactor NHE-RF1 OS=Homo sapiens GN=SLC9A3R1 PE=1 SV=4	1	1	1												16000000	0	16000000				16000000		100	0	6.64386		1	TRUE	FALSE	FALSE	7	411	1.70316	Tnon_mito	EBP50|NHERF|NHERF-1|NHERF1|NPHLOP2|O14745	ENSG00000109062
ROCK2	Rho-associated protein kinase 2 OS=Homo sapiens GN=ROCK2 PE=1 SV=4	1	4	11	7800000												7800000	0	0					0	0			0	TRUE	TRUE	TRUE	11	411	2.6764	Tnon_mito	ROCK-II|O75116	ENSG00000134318
MPDU1	Mannose-P-dolichol utilization defect 1 protein OS=Homo sapiens GN=MPDU1 PE=1 SV=2	1	1	4					6300000	4300000	6100000				9100000			6450000		0.00737134	2.13245	9100000	5.56667e+06	100	100	6.64386	6.64386	4	TRUE	FALSE	FALSE	5	411	1.21655	Tpossible_mito	CDGIF|HBEBP2BPA|Lec35|My008|PP3958|PQLC5|SL15|O75352	ENSG00000129255
SLK	STE20-like serine/threonine-protein kinase OS=Homo sapiens GN=SLK PE=1 SV=1	1	1	1		5000000											5000000	0	0					0	0			0	TRUE	FALSE	FALSE	41	411	9.97567	Tnon_mito	LOSK|STK2|bA16H23.1|se20-9|Q9H2G2	ENSG00000065613
SYNCRIP	Heterogeneous nuclear ribonucleoprotein Q OS=Homo sapiens GN=SYNCRIP PE=1 SV=2	11	15	157	230000000	150000000	66000000	75000000	77000000	58000000	100000000	71000000	67000000	69000000	130000000	75000000	130250000	80875000	0.620921	0.288793	0.539413	85250000	76500000	0.654511	0.587332	-0.611512	-0.767752	8	FALSE	TRUE	TRUE	197	411	47.9319	Tnon_mito	GRY-RBP|GRYRBP|HNRNPQ|HNRPQ1|NSAP1|PP68|hnRNP-Q|O60506	ENSG00000135316
VAT1	Synaptic vesicle membrane protein VAT-1 homolog OS=Homo sapiens GN=VAT1 PE=1 SV=2	13	13	205	63000000	80000000	44000000	53000000	55000000	60000000	56000000	67000000	66000000	95000000	71000000	77000000	60000000	68375000	1.13958	0.39261	0.406039	77250000	59500000	1.2875	0.991667	0.364572	-0.0120728	8	FALSE	TRUE	TRUE	35	411	8.51582	Tpossible_mito	VATI|Q99536	ENSG00000108828
TBL2	Transducin beta-like protein 2 OS=Homo sapiens GN=TBL2 PE=1 SV=1	3	3	7	12000000	16000000					6300000	6100000			8500000		14000000	6.96667e+06	0.497619	0.140033	0.853771	8500000	6200000	0.607143	0.442857	-0.719892	-1.17509	3	FALSE	TRUE	TRUE	24	411	5.83942	Tnon_mito	WBSCR13|WS-betaTRP|Q9Y4P3	ENSG00000106638
PCYOX1	Prenylcysteine oxidase 1 OS=Homo sapiens GN=PCYOX1 PE=1 SV=3	8	8	43	16000000	12000000	4500000	7300000	11000000	15000000	12000000	17000000	20000000	21000000	18000000	22000000	9950000	17000000	1.70854	0.0604846	1.21836	20250000	13750000	2.03518	1.38191	1.02515	0.466663	8	FALSE	TRUE	TRUE	3	411	0.729927	Tnon_mito	PCL1|Q9UHG3	ENSG00000116005
LRRCC1	Leucine-rich repeat and coiled-coil domain-containing protein 1 OS=Homo sapiens GN=LRRCC1 PE=1 SV=2	1	1	1				7500000									7500000	0	0					0	0			0	TRUE	FALSE	FALSE	0	411	0	Tnon_mito	CLERC|SAP2|VFL1|Q9C099	ENSG00000133739
REEP6	Receptor expression-enhancing protein 6 OS=Homo sapiens GN=REEP6 PE=1 SV=1	1	1	1								7100000					0	7100000					7100000	0	100		6.64386	1	TRUE	FALSE	FALSE	1	411	0.243309	Tnon_mito	C19orf32|DP1L1|TB2L1|Q96HR9	ENSG00000115255
MIA3	Melanoma inhibitory activity protein 3 OS=Homo sapiens GN=MIA3 PE=2 SV=1	5	5	13	16000000	18000000							8800000	9800000	13000000		17000000	1.05333e+07	0.619608	0.0284815	1.54544	1.05333e+07		0.619608	0	-0.690573		3	TRUE	TRUE	TRUE	16	411	3.89294	Tnon_mito	ARNT|D320|TANGO|TANGO1|UNQ6077|Q5JRA6	ENSG00000154305
ATP6V1G1	V-type proton ATPase subunit G 1 OS=Homo sapiens GN=ATP6V1G1 PE=1 SV=3	1	1	10	14000000	18000000	5100000	9000000		11000000	12000000		7400000	7300000	20000000	22000000	11525000	1.32833e+07	1.15257	0.659009	0.181108	14175000	11500000	1.22993	0.997831	0.298582	-0.00313289	6	FALSE	FALSE	TRUE	13	411	3.16302	Tnon_mito	ATP6G|ATP6G1|ATP6GL|ATP6J|Vma10|O75348	ENSG00000136888
PALLD	Palladin OS=Homo sapiens GN=PALLD PE=1 SV=3	2	2	3	7800000	8000000										4800000	7900000	4800000	0.607595			4800000		0.607595	0	-0.718818		1	TRUE	FALSE	FALSE	23	411	5.59611	Tnon_mito	CGI151|MYN|PNCA1|SIH002|Q8WX93	ENSG00000129116
PARVA	Alpha-parvin OS=Homo sapiens GN=PARVA PE=4 SV=1	1	1	1											2600000		0	2600000				2600000		100	0	6.64386		1	TRUE	FALSE	FALSE	2	411	0.486618	Tnon_mito	CH-ILKBP|MXRA2|Q9NVD7	ENSG00000197702
CSDE1	Isoform 4 of Cold shock domain-containing protein E1 OS=Homo sapiens GN=CSDE1	17	17	90	36000000	40000000	19000000	20000000	14000000	20000000	18000000	20000000	16000000	22000000	34000000	40000000	28750000	23000000	0.8	0.401286	0.396546	28000000	18000000	0.973913	0.626087	-0.0381351	-0.675565	8	FALSE	TRUE	TRUE	67	411	16.3017	Tpossible_mito	D1S155E|RP5-1000E10.3|UNR|O75534	ENSG00000009307
PTMS	Parathymosin OS=Homo sapiens GN=PTMS PE=2 SV=1	1	1	1			48000000										48000000	0	0					0	0			0	TRUE	FALSE	FALSE	23	411	5.59611	Tnon_mito	ParaT|P20962	ENSG00000159335
DDRGK1	DDRGK domain-containing protein 1 OS=Homo sapiens GN=DDRGK1 PE=1 SV=2	5	5	14	9900000	18000000		1900000	5100000		7800000	14000000		7500000	6200000	14000000	9.93333e+06	9100000	0.916107	0.878185	0.0564138	9.23333e+06	8.96667e+06	0.92953	0.902685	-0.105426	-0.147706	6	FALSE	TRUE	TRUE	3	411	0.729927	Tnon_mito	C20orf116|UFBP1|dJ1187M17.3|Q96HY6	ENSG00000198171
ALDOA	Fructose-bisphosphate aldolase A OS=Homo sapiens GN=ALDOA PE=1 SV=2	17	19	184	170000000	170000000	64000000	60000000	32000000	40000000	50000000	62000000	40000000	58000000	220000000	260000000	116000000	95250000	0.821121	0.653961	0.184448	144500000	46000000	1.24569	0.396552	0.316945	-1.33442	8	FALSE	TRUE	TRUE	172	411	41.8491	Tpossible_mito	ALDA|GSD12|HEL-S-87p|P04075	ENSG00000149925
KRT35	Keratin, type I cuticular Ha5 OS=Homo sapiens GN=KRT35 PE=2 SV=1	5	14	81					100000000	98000000							0	99000000					99000000	0	100		6.64386	2	TRUE	TRUE	TRUE	189	411	45.9854	Tnon_mito	HA5|Ha-5|KRTHA5|hHa5|Q92764	ENSG00000197079
KRT75	SWISS-PROT:O95678 Tax_Id=9606 Gene_Symbol=KRT75 Keratin, type II cytoskeletal 75	3	13	150			3700000	4200000	350000000	440000000							3950000	395000000	100	0.0729303	1.13709		395000000	0	100		6.64386	2	FALSE	TRUE	TRUE	276	411	67.1533	Tnon_mito	K6HF|KB18|PFB|O95678	ENSG00000170454
ARFGAP1	Isoform 2 of ADP-ribosylation factor GTPase-activating protein 1 OS=Homo sapiens GN=ARFGAP1	2	2	8		12000000			10000000	13000000	12000000		11000000	15000000		20000000	12000000	13500000	1.125			1.53333e+07	1.16667e+07	1.27778	0.972222	0.353637	-0.040642	6	TRUE	FALSE	TRUE	24	411	5.83942	Tnon_mito	ARF1GAP|HRIHFB2281|Q8N6T3	ENSG00000101199
NCAPG	Condensin complex subunit 3 OS=Homo sapiens GN=NCAPG PE=1 SV=1	1	1	3				5600000							11000000	5500000	5600000	8250000	1.47321			8250000		1.47321	0	0.558967		2	TRUE	FALSE	FALSE	59	411	14.3552	Tnon_mito	CAPG|CHCG|NY-MEL-3|YCG1|Q9BPX3	ENSG00000109805
RPL13	60S ribosomal protein L13 OS=Homo sapiens GN=RPL13 PE=1 SV=4	7	7	99	360000000	500000000	170000000	210000000	120000000	170000000	140000000	170000000	160000000	200000000	240000000	290000000	310000000	186250000	0.600806	0.199353	0.700378	222500000	150000000	0.717742	0.483871	-0.478463	-1.04731	8	FALSE	TRUE	TRUE	218	411	53.0414	Tnon_mito	BBC1|D16S444E|D16S44E|L13|P26373	ENSG00000167526
RPL28	60S ribosomal protein L28 OS=Homo sapiens GN=RPL28 PE=2 SV=1	4	4	51	170000000	260000000	68000000	79000000	71000000	80000000	70000000	84000000	76000000	100000000	140000000	160000000	144250000	97625000	0.676776	0.380624	0.419504	119000000	76250000	0.824957	0.528596	-0.27761	-0.919762	8	FALSE	TRUE	TRUE	109	411	26.5207	Tnon_mito	L28|P46779	ENSG00000108107
TMEM230	Isoform 1 of Transmembrane protein 230 OS=Homo sapiens GN=TMEM230	1	1	4	5700000						4900000		3000000			7100000	5700000	5000000	0.877193			5050000	4900000	0.885965	0.859649	-0.174679	-0.21818	3	TRUE	FALSE	FALSE	0	411	0	Tnon_mito	C20orf30|HSPC274|dJ1116H23.2.1|Q96A57	ENSG00000089063
C1orf122	Uncharacterized protein C1orf122 OS=Homo sapiens GN=C1orf122 PE=2 SV=2	1	1	3									7500000	12000000	10000000		0	9.83333e+06				9.83333e+06		100	0	6.64386		3	TRUE	FALSE	FALSE	1	411	0.243309	Tnon_mito	ALAESM|Q6ZSJ8	ENSG00000197982
SYNRG	Synergin gamma OS=Homo sapiens GN=SYNRG PE=1 SV=2	1	1	1		16000000											16000000	0	0					0	0			0	TRUE	FALSE	FALSE	8	411	1.94647	Tnon_mito	AP1GBP1|SYNG|Q9UMZ2	ENSG00000006114
HYPK	Huntingtin-interacting protein K OS=Homo sapiens GN=HYPK PE=1 SV=2	1	1	5	12000000		12000000	6100000					31000000				1.00333e+07	31000000	3.0897			31000000		3.0897	0	1.62747		1	TRUE	FALSE	TRUE	33	411	8.0292	Tnon_mito	C15orf63|Q9NX55	ENSG00000140264
MXRA7	Matrix-remodeling-associated protein 7 OS=Homo sapiens GN=MXRA7 PE=1 SV=1	1	1	1												19000000	0	19000000				19000000		100	0	6.64386		1	TRUE	FALSE	FALSE	7	411	1.70316	Tnon_mito	PS1TP1|TMAP1|P84157	ENSG00000182534
ATP2A2	Sarcoplasmic/endoplasmic reticulum calcium ATPase 2 OS=Homo sapiens GN=ATP2A2 PE=1 SV=1	16	16	89	59000000	52000000	11000000	18000000	28000000	22000000	36000000	26000000	15000000	22000000	50000000	32000000	35000000	28875000	0.825	0.654643	0.183996	29750000	28000000	0.85	0.8	-0.234465	-0.321928	8	FALSE	TRUE	TRUE	92	411	22.3844	Tnon_mito	ATP2B|DAR|DD|SERCA2|P16615	ENSG00000174437
GLO1	Lactoylglutathione lyase OS=Homo sapiens GN=GLO1 PE=1 SV=4	4	4	12		10000000							5700000		15000000	28000000	10000000	1.62333e+07	1.62333			1.62333e+07		1.62333	0	0.698959		3	TRUE	TRUE	TRUE	46	411	11.1922	Tnon_mito	GLOD1|GLYI|HEL-S-74|Q04760	ENSG00000124767
TBC1D4	TBC1 domain family member 4 OS=Homo sapiens GN=TBC1D4 PE=1 SV=2	1	1	1			1300000										1300000	0	0					0	0			0	TRUE	FALSE	FALSE	67	411	16.3017	Tnon_mito	AS160|O60343	ENSG00000136111
SMC2	Structural maintenance of chromosomes protein 2 OS=Homo sapiens GN=SMC2 PE=1 SV=2	8	8	21	98000000	23000000	9800000	9500000			6000000	6100000	8000000	8100000	15000000	16000000	35075000	9.86667e+06	0.281302	0.320504	0.494167	11775000	6050000	0.335709	0.172488	-1.57472	-2.53544	6	FALSE	TRUE	TRUE	82	411	19.9513	Tnon_mito	CAP-E|CAPE|SMC-2|SMC2L1|O95347	ENSG00000136824
CLCC1	Chloride channel CLIC-like protein 1 OS=Homo sapiens GN=CLCC1 PE=1 SV=1	5	5	27	30000000	28000000	9800000	10000000	9600000	18000000	17000000	13000000	21000000	12000000	15000000	27000000	19450000	16575000	0.852185	0.651173	0.186303	18750000	14400000	0.96401	0.74036	-0.0528796	-0.433701	8	FALSE	TRUE	TRUE	21	411	5.10949	Tnon_mito	MCLC|Q96S66	ENSG00000121940
NOSIP	Nitric oxide synthase-interacting protein OS=Homo sapiens GN=NOSIP PE=1 SV=1	1	1	5	3200000	3400000							2000000		3200000	2900000	3300000	2700000	0.818182	0.234112	0.630575	2700000		0.818182	0	-0.289507		3	FALSE	FALSE	TRUE	12	411	2.91971	Tnon_mito	Q9Y314	ENSG00000142546
CINP	Isoform 3 of Cyclin-dependent kinase 2-interacting protein OS=Homo sapiens GN=CINP	1	1	2	210000000							33000000					210000000	33000000	0.157143				33000000	0	0.157143		-2.66985	1	TRUE	FALSE	FALSE	0	411	0	Tnon_mito	Q9BW66	ENSG00000100865
C17orf75	Protein Njmu-R1 OS=Homo sapiens GN=C17orf75 PE=2 SV=1	1	1	8	5000000	5200000		1700000	1700000		2400000		1600000		3700000	3900000	3.96667e+06	2660000	0.670588	0.373735	0.427436	3.06667e+06	2050000	0.773109	0.516807	-0.371256	-0.952303	5	FALSE	FALSE	TRUE	2	411	0.486618	Tnon_mito	NJMU-R1|Q9HAS0	ENSG00000108666
C7orf50	Uncharacterized protein C7orf50 OS=Homo sapiens GN=C7orf50 PE=1 SV=1	3	3	27	22000000	29000000	20000000	18000000	11000000	15000000	14000000	19000000	16000000	16000000	19000000	20000000	22250000	16250000	0.730337	0.0801697	1.09599	17750000	14750000	0.797753	0.662921	-0.325986	-0.59309	8	FALSE	TRUE	TRUE	25	411	6.08273	Tnon_mito	YCR016W|Q9BRJ6	ENSG00000146540
ALG5	Dolichyl-phosphate beta-glucosyltransferase OS=Homo sapiens GN=ALG5 PE=1 SV=1	1	1	4	20000000	20000000						17000000				19000000	20000000	18000000	0.9	0.295167	0.529932	19000000	17000000	0.95	0.85	-0.0740006	-0.234465	2	FALSE	FALSE	FALSE	2	411	0.486618	Tnon_mito	RP11-421P11.2|bA421P11.2|Q9Y673	ENSG00000120697
TAGLN2	Transgelin-2 OS=Homo sapiens GN=TAGLN2 PE=1 SV=3	6	6	39	30000000	37000000	16000000	20000000	8900000	10000000	8900000	8900000	9400000	9400000	50000000	56000000	25750000	20187500	0.783981	0.533349	0.272989	31200000	9175000	1.21165	0.356311	0.276974	-1.48879	8	FALSE	TRUE	TRUE	156	411	37.9562	Tnon_mito	HA1756|P37802	ENSG00000158710
DPYSL3	Isoform LCRMP-4 of Dihydropyrimidinase-related protein 3 OS=Homo sapiens GN=DPYSL3	2	2	4		12000000									14000000	24000000	12000000	19000000	1.58333			19000000		1.58333	0	0.662965		2	TRUE	FALSE	FALSE	50	411	12.1655	Tnon_mito	CRMP-4|CRMP4|DRP-3|DRP3|LCRMP|ULIP|ULIP-1|Q14195	ENSG00000113657
GBA	Glucosylceramidase OS=Homo sapiens GN=GBA PE=1 SV=3	5	5	25	24000000	19000000			22000000	21000000	24000000	17000000	17000000	24000000	23000000	16000000	21500000	20500000	0.953488	0.762344	0.117849	20000000	21000000	0.930233	0.976744	-0.104337	-0.0339473	8	FALSE	TRUE	TRUE	2	411	0.486618	Tnon_mito	GBA1|GCB|GLUC|P04062	ENSG00000177628
GMFB	Glia maturation factor beta (Fragment) OS=Homo sapiens GN=GMFB PE=2 SV=1	1	1	1											19000000		0	19000000				19000000		100	0	6.64386		1	TRUE	FALSE	FALSE	2	411	0.486618	Tnon_mito	GMF|P60983	ENSG00000197045
SFN	14-3-3 protein sigma OS=Homo sapiens GN=SFN PE=1 SV=1	6	8	66					29000000	44000000							0	36500000					36500000	0	100		6.64386	2	TRUE	TRUE	TRUE	116	411	28.2238	Tnon_mito	YWHAS|P31947	ENSG00000175793
GSN	Gelsolin OS=Homo sapiens GN=GSN PE=1 SV=1	5	5	7			6500000	10000000									8250000	0	0					0	0			0	TRUE	TRUE	TRUE	26	411	6.32603	Tnon_mito	ADF|AGEL|P06396	ENSG00000148180
KRT14	SWISS-PROT:P02533 Tax_Id=9606 Gene_Symbol=KRT14 Keratin, type I cytoskeletal 14	12	28	386	84000000	91000000	77000000	94000000	44000000	51000000	78000000	85000000	86000000	100000000	82000000	96000000	86500000	77750000	0.898844	0.303263	0.51818	91000000	64500000	1.05202	0.745665	0.0731664	-0.423401	8	FALSE	TRUE	TRUE	284	411	69.0998	Tnon_mito	CK14|EBS3|EBS4|K14|NFJ|P02533	ENSG00000186847
LGALS3BP	Galectin-3-binding protein OS=Homo sapiens GN=LGALS3BP PE=1 SV=1	3	3	5	32000000							9700000	7300000	20000000	27000000		32000000	16000000	0.5			18100000	9700000	0.565625	0.303125	-0.822082	-1.72202	4	TRUE	TRUE	TRUE	25	411	6.08273	Tnon_mito	90K|BTBD17B|MAC-2-BP|TANGO10B|Q08380	ENSG00000108679
MARCKS	Myristoylated alanine-rich C-kinase substrate OS=Homo sapiens GN=MARCKS PE=1 SV=4	11	11	309	350000000	390000000	190000000	220000000	210000000	260000000	260000000	300000000	310000000	340000000	310000000	340000000	287500000	291250000	1.01304	0.945478	0.0243486	325000000	257500000	1.13043	0.895652	0.176878	-0.15899	8	FALSE	TRUE	TRUE	95	411	23.1144	Tnon_mito	80K-L|MACS|PKCSL|PRKCSL|P29966	ENSG00000155130
MFGE8	Lactadherin OS=Homo sapiens GN=MFGE8 PE=1 SV=2	1	1	4						13000000		14000000	16000000	22000000				16250000		0.00398617	2.39944	19000000	13500000	100	100	6.64386	6.64386	4	TRUE	FALSE	FALSE	1	411	0.243309	Tnon_mito	BA46|EDIL1|HMFG|HsT19888|MFG-E8|MFGM|OAcGD3S|SED1|SPAG10|hP47|Q08431	ENSG00000140545
NHP2L1	NHP2-like protein 1 OS=Homo sapiens GN=NHP2L1 PE=2 SV=1	3	3	19	17000000	23000000	11000000	15000000	14000000	25000000	14000000	14000000		20000000	14000000	17000000	16500000	1.68571e+07	1.02165	0.908642	0.041607	17000000	16750000	1.0303	1.01515	0.0430687	0.0216951	7	FALSE	TRUE	TRUE	59	411	14.3552	Tnon_mito	15.5K|FA-1|FA1|NHPX|OTK27|SNRNP15-5|SNU13|SPAG12|SSFA1|P55769	ENSG00000100138
PNP	Purine nucleoside phosphorylase OS=Homo sapiens GN=PNP PE=1 SV=2	1	1	1											10000000		0	10000000				10000000		100	0	6.64386		1	TRUE	FALSE	FALSE	36	411	8.75912	Tnon_mito	NP|PRO1837|PUNP|P00491	ENSG00000198805
PPP1CA	Isoform 2 of Serine/threonine-protein phosphatase PP1-alpha catalytic subunit OS=Homo sapiens GN=PPP1CA	2	10	28	28000000	23000000	16000000	18000000					12000000	12000000		23000000	21250000	1.56667e+07	0.737255	0.28733	0.54162	1.56667e+07		0.737255	0	-0.439765		3	FALSE	TRUE	TRUE	123	411	29.927	Tnon_mito	PP-1A|PP1A|PP1alpha|PPP1A|P62136	ENSG00000172531
PSME1	Proteasome activator complex subunit 1 OS=Homo sapiens GN=PSME1 PE=1 SV=1	2	2	2											4500000	5800000	0	5150000				5150000		100	0	6.64386		2	TRUE	FALSE	FALSE	37	411	9.00243	Tnon_mito	IFI5111|PA28A|PA28alpha|REGalpha|Q06323	ENSG00000092010
PTMA	Prothymosin alpha OS=Homo sapiens GN=PTMA PE=1 SV=2	1	1	13	180000000	210000000	170000000	190000000							300000000	390000000	187500000	345000000	1.84	0.166558	0.778434	345000000		1.84	0	0.879706		2	FALSE	FALSE	TRUE	68	411	16.545	Tnon_mito	TMSA|P06454	ENSG00000187514
RPL29	60S ribosomal protein L29 OS=Homo sapiens GN=RPL29 PE=1 SV=2	2	2	49	940000000	960000000	250000000	290000000	290000000	350000000	360000000	420000000	430000000	470000000	610000000	660000000	610000000	448750000	0.735656	0.47717	0.321327	542500000	355000000	0.889344	0.581967	-0.169186	-0.78099	8	FALSE	FALSE	TRUE	169	411	41.1192	Tnon_mito	HIP|HUMRPL29|L29|RPL29P10|RPL29_3_370|P47914	ENSG00000162244
RPL32	60S ribosomal protein L32 OS=Homo sapiens GN=RPL32 PE=2 SV=1	3	3	74	250000000	270000000	53000000	58000000	55000000	72000000	92000000	100000000	61000000	70000000	120000000	180000000	157750000	93750000	0.594295	0.363063	0.440018	107750000	79750000	0.683043	0.505547	-0.549952	-0.984084	8	FALSE	TRUE	TRUE	72	411	17.5182	Tnon_mito	L32|P62910	ENSG00000144713
SKP1	S-phase kinase-associated protein 1 OS=Homo sapiens GN=SKP1 PE=2 SV=1	5	5	32	31000000	25000000	22000000	20000000	26000000	23000000	27000000	27000000	26000000	26000000	47000000	28000000	24500000	28750000	1.17347	0.265337	0.576202	31750000	25750000	1.29592	1.05102	0.373975	0.0717907	8	FALSE	TRUE	TRUE	145	411	35.2798	Tnon_mito	EMC19|OCP-II|OCP2|SKP1A|TCEB1L|p19A|P63208	ENSG00000113558
TBCA	Tubulin-specific chaperone A OS=Homo sapiens GN=TBCA PE=2 SV=1	2	2	2												21000000	0	21000000				21000000		100	0	6.64386		1	TRUE	FALSE	FALSE	24	411	5.83942	Tnon_mito	O75347	ENSG00000171530
STX7	Syntaxin-7 OS=Homo sapiens GN=STX7 PE=1 SV=4	6	6	37	24000000	28000000	11000000		12000000	14000000	17000000	18000000	12000000	13000000	22000000	25000000	21000000	16625000	0.791667	0.489414	0.310324	18000000	15250000	0.857143	0.72619	-0.222392	-0.46158	8	FALSE	TRUE	TRUE	5	411	1.21655	Tnon_mito	O15400	ENSG00000079950
AP3B1	AP-3 complex subunit beta-1 OS=Homo sapiens GN=AP3B1 PE=1 SV=3	3	3	9	9300000	15000000		6100000	9400000						11000000	13000000	1.01333e+07	1.11333e+07	1.09868	0.748021	0.126086	12000000	9400000	1.18421	0.927632	0.243926	-0.108376	3	FALSE	TRUE	TRUE	41	411	9.97567	Tnon_mito	ADTB3|ADTB3A|HPS|HPS2|PE|O00203	ENSG00000132842
AP3D1	Isoform 5 of AP-3 complex subunit delta-1 OS=Homo sapiens GN=AP3D1	1	1	11	27000000	34000000	6700000		7900000					14000000	21000000	16000000	2.25667e+07	14725000	0.652511	0.443786	0.352826	17000000	7900000	0.753323	0.350074	-0.408659	-1.51427	4	FALSE	FALSE	TRUE	73	411	17.7616	Tnon_mito	ADTD|hBLVR|O14617	ENSG00000065000
RTN3	Isoform 3 of Reticulon-3 OS=Homo sapiens GN=RTN3	3	3	57	82000000	92000000	33000000	44000000	31000000	48000000	45000000	100000000	100000000	56000000	72000000	93000000	62750000	68125000	1.08566	0.766007	0.115768	80250000	56000000	1.27888	0.89243	0.354886	-0.164189	8	FALSE	TRUE	TRUE	10	411	2.43309	Tnon_mito	ASYIP|HAP|NSPL2|NSPLII|RTN3-A1|O95197	ENSG00000133318
RPL36	60S ribosomal protein L36 OS=Homo sapiens GN=RPL36 PE=1 SV=3	3	3	34	130000000	210000000	87000000	98000000	25000000	65000000	54000000	68000000	41000000	65000000	110000000	130000000	131250000	69750000	0.531429	0.109314	0.961326	86500000	53000000	0.659048	0.40381	-0.601545	-1.30825	8	FALSE	TRUE	TRUE	93	411	22.6277	Tnon_mito	L36|Q9Y3U8	ENSG00000130255
AP3M1	AP-3 complex subunit mu-1 OS=Homo sapiens GN=AP3M1 PE=1 SV=1	1	1	1					14000000								0	14000000					14000000	0	100		6.64386	1	TRUE	FALSE	FALSE	14	411	3.40633	Tnon_mito	RP11-178G16.4|Q9Y2T2	ENSG00000185009
SCPEP1	Retinoid-inducible serine carboxypeptidase OS=Homo sapiens GN=SCPEP1 PE=1 SV=1	1	1	9	24000000			11000000	19000000	27000000	19000000	29000000		34000000	29000000	34000000	17500000	2.72857e+07	1.55918	0.352496	0.452845	3.23333e+07	23500000	1.84762	1.34286	0.885667	0.425306	7	FALSE	FALSE	TRUE	2	411	0.486618	Tnon_mito	HSCP1|RISC|Q9HB40	ENSG00000121064
BLOC1S2	Biogenesis of lysosome-related organelles complex 1 subunit 2 OS=Homo sapiens GN=BLOC1S2 PE=1 SV=1	1	1	4		10000000		11000000				5300000				9900000	10500000	7600000	0.72381	0.420329	0.37641	9900000	5300000	0.942857	0.504762	-0.0848889	-0.986325	2	FALSE	FALSE	FALSE	27	411	6.56934	Tpossible_mito	BLOS2|CEAP|CEAP11|RP11-316M21.4|Q6QNY1	ENSG00000196072
NPM1	Nucleophosmin OS=Homo sapiens GN=NPM1 PE=1 SV=2	10	10	249	1100000000	1300000000	350000000	440000000	340000000	390000000	530000000	620000000	330000000	560000000	730000000	700000000	797500000	525000000	0.658307	0.336469	0.473055	580000000	470000000	0.727273	0.589342	-0.459432	-0.762824	8	FALSE	TRUE	TRUE	252	411	61.3139	Tnon_mito	B23|NPM|P06748	ENSG00000181163
TPD52L2	Isoform 7 of Tumor protein D54 OS=Homo sapiens GN=TPD52L2	5	5	33	41000000	26000000	32000000	32000000	45000000	29000000	44000000	28000000	47000000	40000000	45000000	23000000	32750000	37625000	1.14885	0.312206	0.505559	38750000	36500000	1.18321	1.1145	0.242701	0.156402	8	FALSE	TRUE	TRUE	33	411	8.0292	Tnon_mito	D54|O43399	ENSG00000101150
NAPA	Alpha-soluble NSF attachment protein OS=Homo sapiens GN=NAPA PE=1 SV=3	5	5	34	24000000	21000000	6200000	7300000	18000000	16000000	15000000	16000000	13000000	16000000	22000000	21000000	14625000	17125000	1.17094	0.629445	0.201042	18000000	16250000	1.23077	1.11111	0.29956	0.152003	8	FALSE	TRUE	TRUE	3	411	0.729927	Tnon_mito	SNAPA|P54920	ENSG00000105402
CKAP4	Cytoskeleton-associated protein 4 OS=Homo sapiens GN=CKAP4 PE=1 SV=2	7	7	21	22000000	21000000			8400000	11000000	12000000	13000000	6700000	10000000	14000000	15000000	21500000	11262500	0.523837	2.23959e-05	4.64983	11425000	11100000	0.531395	0.516279	-0.912142	-0.953777	8	TRUE	TRUE	TRUE	58	411	14.1119	Tnon_mito	CLIMP-63|ERGIC-63|p63|Q07065	ENSG00000136026
TMEM109	Transmembrane protein 109 OS=Homo sapiens GN=TMEM109 PE=1 SV=1	2	2	28	56000000	90000000	19000000	26000000	56000000	83000000	36000000	69000000	48000000	74000000	75000000	58000000	47750000	62375000	1.30628	0.444754	0.35188	63750000	61000000	1.33508	1.27749	0.416925	0.353309	8	FALSE	FALSE	TRUE	29	411	7.05596	Tnon_mito	Q9BVC6	ENSG00000110108
PSMD3	26S proteasome non-ATPase regulatory subunit 3 OS=Homo sapiens GN=PSMD3 PE=1 SV=2	15	15	69	32000000	37000000	43000000	55000000	16000000	21000000	17000000	18000000	9700000	16000000	34000000	31000000	41750000	20337500	0.487126	0.0129055	1.88923	22675000	18000000	0.543114	0.431138	-0.880674	-1.21378	8	TRUE	TRUE	TRUE	111	411	27.0073	Tnon_mito	P58|RPN3|S3|TSTA2|O43242	ENSG00000108344
PSMD12	26S proteasome non-ATPase regulatory subunit 12 OS=Homo sapiens GN=PSMD12 PE=1 SV=3	10	10	34	25000000	23000000	24000000	32000000	13000000	17000000	10000000	11000000	11000000	16000000	18000000	26000000	26000000	15250000	0.586538	0.0048892	2.31076	17750000	12750000	0.682692	0.490385	-0.550693	-1.02801	8	TRUE	TRUE	TRUE	97	411	23.601	Tnon_mito	Rpn5|p55|O00232	ENSG00000197170
PSMD13	26S proteasome non-ATPase regulatory subunit 13 OS=Homo sapiens GN=PSMD13 PE=1 SV=2	13	13	30	14000000	10000000	35000000	30000000				16000000		8000000	23000000	19000000	22250000	16500000	0.741573	0.442749	0.353842	1.66667e+07	16000000	0.749064	0.719101	-0.41684	-0.475733	4	FALSE	TRUE	TRUE	79	411	19.2214	Tnon_mito	HSPC027|Rpn9|S11|p40.5|Q9UNM6	ENSG00000185627
TALDO1	Transaldolase OS=Homo sapiens GN=TALDO1 PE=1 SV=2	3	3	3											20000000	17000000	0	18500000				18500000		100	0	6.64386		2	TRUE	TRUE	FALSE	41	411	9.97567	Tnon_mito	TAL|TAL-H|TALDOR|TALH|P37837	ENSG00000177156
UBE4A	Isoform 2 of Ubiquitin conjugation factor E4 A OS=Homo sapiens GN=UBE4A	1	1	5	5000000						3500000			4700000	5300000	6300000	5000000	4950000	0.99			5.43333e+06	3500000	1.08667	0.7	0.119909	-0.514573	4	TRUE	FALSE	TRUE	2	411	0.486618	Tnon_mito	E4|UBOX2|UFD2|Q14139	ENSG00000110344
UBE2O	Ubiquitin-conjugating enzyme E2 O OS=Homo sapiens GN=UBE2O PE=1 SV=3	2	2	3				5000000							7000000		5000000	7000000	1.4			7000000		1.4	0	0.485427		1	TRUE	FALSE	FALSE	35	411	8.51582	Tnon_mito	E2-230K|Q9C0C9	ENSG00000175931
MMS19	Isoform 5 of MMS19 nucleotide excision repair protein homolog OS=Homo sapiens GN=MMS19	1	1	1				1200000									1200000	0	0					0	0			0	TRUE	FALSE	FALSE	25	411	6.08273	Tnon_mito	MET18|MMS19L|hMMS19|Q96T76	ENSG00000155229
NAP1L4	Isoform 2 of Nucleosome assembly protein 1-like 4 OS=Homo sapiens GN=NAP1L4	5	6	23	17000000	38000000	31000000	33000000							22000000	37000000	29750000	29500000	0.991597	0.980081	0.00873819	29500000		0.991597	0	-0.0121747		2	FALSE	TRUE	TRUE	90	411	21.8978	Tnon_mito	NAP1L4b|NAP2|NAP2L|hNAP2|Q99733	ENSG00000205531
BAG6	Isoform 3 of Large proline-rich protein BAG6 OS=Homo sapiens GN=BAG6	1	1	3									4500000	8500000		7500000	0	6.83333e+06				6.83333e+06		100	0	6.64386		3	TRUE	FALSE	FALSE	44	411	10.7056	Tnon_mito	BAG-6|BAT3|D6S52E|G3|P46379	ENSG00000096155
PCNA	Proliferating cell nuclear antigen OS=Homo sapiens GN=PCNA PE=1 SV=1	8	8	30	18000000	19000000	11000000	12000000			11000000	17000000	12000000	16000000	43000000	44000000	15000000	2.38333e+07	1.58889	0.230062	0.638155	28750000	14000000	1.91667	0.933333	0.938599	-0.0995357	6	FALSE	TRUE	TRUE	97	411	23.601	Tnon_mito	P12004	ENSG00000132646
RELB	Transcription factor RelB OS=Homo sapiens GN=RELB PE=1 SV=2	1	1	1												11000000	0	11000000				11000000		100	0	6.64386		1	TRUE	FALSE	FALSE	0	411	0	Tnon_mito	I-REL|IREL|REL-B|Q01201	ENSG00000104856
TCOF1	Isoform 3 of Treacle protein OS=Homo sapiens GN=TCOF1	15	15	84	41000000	46000000	13000000	13000000	21000000	31000000	25000000	21000000	21000000	28000000	35000000	40000000	28250000	27750000	0.982301	0.95969	0.0178689	31000000	24500000	1.09735	0.867257	0.134017	-0.205469	8	FALSE	TRUE	TRUE	103	411	25.0608	Tnon_mito	MFD1|TCS1|treacle|Q13428	ENSG00000070814
IRS4	Insulin receptor substrate 4 OS=Homo sapiens GN=IRS4 PE=1 SV=1	14	14	88	52000000	66000000	27000000	34000000	14000000	26000000	26000000	32000000	24000000	29000000	42000000	47000000	44750000	30000000	0.670391	0.196462	0.706722	35500000	24500000	0.793296	0.547486	-0.334069	-0.869106	8	FALSE	TRUE	TRUE	152	411	36.983	Tnon_mito	IRS-4|PY160|O14654	ENSG00000133124
EIF4G3	Isoform 3 of Eukaryotic translation initiation factor 4 gamma 3 OS=Homo sapiens GN=EIF4G3	5	8	35	58000000	43000000	11000000	19000000			15000000	15000000		19000000	33000000	22000000	32750000	20800000	0.635115	0.357219	0.447065	2.46667e+07	15000000	0.753181	0.458015	-0.408932	-1.12653	5	FALSE	TRUE	TRUE	42	411	10.219	Tnon_mito	eIF-4G 3|eIF4G 3|eIF4GII|O43432	ENSG00000075151
SCFD1	Sec1 family domain-containing protein 1 OS=Homo sapiens GN=SCFD1 PE=1 SV=4	6	6	44	29000000	23000000	8600000	11000000	19000000	16000000	23000000	19000000	16000000	21000000	31000000	20000000	17900000	20625000	1.15223	0.626301	0.203217	22000000	19250000	1.22905	1.07542	0.297544	0.104899	8	FALSE	TRUE	TRUE	17	411	4.13625	Tnon_mito	C14orf163|RA410|SLY1|SLY1P|STXBP1L2|Q8WVM8	ENSG00000092108
SLAIN1	SLAIN motif-containing protein 1 OS=Homo sapiens GN=SLAIN1 PE=1 SV=3	4	4	7		21000000	22000000	16000000		9500000							1.96667e+07	9500000	0.483051				9500000	0	0.483051		-1.04975	1	TRUE	TRUE	TRUE	0	411	0	Tnon_mito	C13orf32|Q8ND83	ENSG00000139737
LAYN	Isoform 3 of Layilin OS=Homo sapiens GN=LAYN	1	1	1						89000000							0	89000000					89000000	0	100		6.64386	1	TRUE	FALSE	FALSE	0	411	0	Tnon_mito	Q6UX15	ENSG00000204381
LAMP1	Lysosome-associated membrane glycoprotein 1 OS=Homo sapiens GN=LAMP1 PE=1 SV=3	2	2	33	69000000	23000000		19000000	45000000	49000000	71000000	18000000	18000000	74000000	74000000	60000000	37000000	51125000	1.38176	0.488148	0.311449	56500000	45750000	1.52703	1.23649	0.610726	0.306246	8	FALSE	FALSE	TRUE	15	411	3.64964	Tnon_mito	CD107a|LAMPA|LGP120|P11279	ENSG00000185896
CAPZB	Isoform 2 of F-actin-capping protein subunit beta OS=Homo sapiens GN=CAPZB	10	10	74	65000000	80000000	67000000	62000000	16000000	21000000	30000000	22000000	17000000	26000000	47000000	50000000	68500000	28625000	0.417883	9.06794e-05	4.04249	35000000	22250000	0.510949	0.324818	-0.968749	-1.6223	8	TRUE	TRUE	TRUE	115	411	27.9805	Tnon_mito	CAPB|CAPPB|CAPZ|P47756	ENSG00000077549
ARPC5	Isoform 2 of Actin-related protein 2/3 complex subunit 5 OS=Homo sapiens GN=ARPC5	1	1	1			11000000										11000000	0	0					0	0			0	TRUE	FALSE	FALSE	12	411	2.91971	Tnon_mito	ARC16|dJ127C7.3|p16-Arc|O15511	ENSG00000162704
DYNC1I2	Cytoplasmic dynein 1 intermediate chain 2 OS=Homo sapiens GN=DYNC1I2 PE=2 SV=1	8	8	38	32000000	35000000	19000000	20000000	9600000	12000000	13000000	9600000		12000000	28000000	32000000	26500000	16600000	0.626415	0.108542	0.964402	24000000	11050000	0.90566	0.416981	-0.142958	-1.26195	7	FALSE	TRUE	TRUE	66	411	16.0584	Tnon_mito	DNCI2|IC2|Q13409	ENSG00000077380
ELAVL1	ELAV-like protein 1 OS=Homo sapiens GN=ELAVL1 PE=2 SV=1	3	3	7		33000000		21000000						16000000	12000000	16000000	27000000	1.46667e+07	0.54321	0.276276	0.558657	1.46667e+07		0.54321	0	-0.880418		3	FALSE	TRUE	TRUE	101	411	24.5742	Tnon_mito	ELAV1|HUR|Hua|MelG|Q15717	ENSG00000066044
LMO7	LIM domain only protein 7 OS=Homo sapiens GN=LMO7 PE=1 SV=3	1	1	1		2900000											2900000	0	0					0	0			0	TRUE	FALSE	FALSE	34	411	8.27251	Tnon_mito	FBX20|FBXO20|LOMP|Q8WWI1	ENSG00000136153
OSBP	Oxysterol-binding protein 1 OS=Homo sapiens GN=OSBP PE=1 SV=1	3	3	5	14000000	21000000		5600000			7600000						1.35333e+07	7600000	0.561576				7600000	0	0.561576		-0.832446	1	TRUE	TRUE	TRUE	4	411	0.973236	Tnon_mito	OSBP1|P22059	ENSG00000110048
RBBP4	Histone-binding protein RBBP4 OS=Homo sapiens GN=RBBP4 PE=1 SV=3	9	14	99	110000000	76000000	52000000	64000000	44000000	37000000	22000000	34000000	23000000	33000000	98000000	52000000	75500000	42875000	0.567881	0.0756083	1.12143	51500000	34250000	0.682119	0.453642	-0.551904	-1.14037	8	FALSE	TRUE	TRUE	148	411	36.0097	Tnon_mito	NURF55|RBAP48|Q09028	ENSG00000162521
RCN2	Reticulocalbin-2 OS=Homo sapiens GN=RCN2 PE=2 SV=1	9	9	88	130000000	110000000	44000000	44000000	45000000	46000000	58000000	44000000	38000000	43000000	89000000	89000000	82000000	56500000	0.689024	0.343944	0.463512	64750000	48250000	0.789634	0.588415	-0.340744	-0.765095	8	FALSE	TRUE	TRUE	126	411	30.6569	Tmito	E6BP|ERC-55|ERC55|TCBP49|Q14257	ENSG00000117906
RNH1	Ribonuclease inhibitor OS=Homo sapiens GN=RNH1 PE=1 SV=2	1	1	2											4000000	4200000	0	4100000				4100000		100	0	6.64386		2	TRUE	FALSE	FALSE	32	411	7.78589	Tnon_mito	RAI|RNH|P13489	ENSG00000023191
SMARCE1	SWI/SNF-related matrix-associated actin-dependent regulator of chromatin subfamily E member 1 OS=Homo sapiens GN=SMARCE1 PE=1 SV=2	2	2	2		16000000	5700000										10850000	0	0					0	0			0	TRUE	FALSE	FALSE	55	411	13.382	Tnon_mito	BAF57|Q969G3	ENSG00000073584
SSB	Lupus La protein OS=Homo sapiens GN=SSB PE=1 SV=2	12	12	85	52000000	55000000	29000000	36000000	22000000	26000000	21000000	19000000	4900000	18000000	53000000	56000000	43000000	27487500	0.639244	0.116457	0.933834	32975000	22000000	0.76686	0.511628	-0.382964	-0.966833	8	FALSE	TRUE	TRUE	102	411	24.8175	Tnon_mito	LARP3|La|P05455	ENSG00000138385
SSRP1	FACT complex subunit SSRP1 OS=Homo sapiens GN=SSRP1 PE=1 SV=1	10	10	38	31000000	34000000	27000000	29000000	16000000	15000000		11000000	8500000	13000000		10000000	30250000	12250000	0.404959	5.14701e-05	4.28845	10500000	14000000	0.347107	0.46281	-1.52655	-1.11151	6	TRUE	TRUE	TRUE	73	411	17.7616	Tnon_mito	FACT|FACT80|T160|Q08945	ENSG00000149136
TOP1	DNA topoisomerase 1 OS=Homo sapiens GN=TOP1 PE=1 SV=2	1	1	4	19000000	22000000		12000000					8200000				1.76667e+07	8200000	0.464151			8200000		0.464151	0	-1.10733		1	TRUE	FALSE	FALSE	110	411	26.764	Tnon_mito	TOPI|P11387	ENSG00000198900
TUBA1A	Tubulin alpha-1A chain OS=Homo sapiens GN=TUBA1A PE=1 SV=1	1	19	314					14000000						16000000		0	15000000				16000000	14000000	100	100	6.64386	6.64386	2	TRUE	TRUE	TRUE	389	411	94.6472	Tnon_mito	B-ALPHA-1|LIS3|TUBA3|Q71U36	ENSG00000167552
CDK13	Cyclin-dependent kinase 13 OS=Homo sapiens GN=CDK13 PE=1 SV=2	1	2	5	13000000												13000000	0	0					0	0			0	TRUE	FALSE	TRUE	36	411	8.75912	Tnon_mito	CDC2L|CDC2L5|CHED|hCDK13|Q14004	ENSG00000065883
FUBP1	Far upstream element-binding protein 1 OS=Homo sapiens GN=FUBP1 PE=2 SV=1	10	13	106	56000000	66000000	15000000	16000000	36000000	47000000	55000000	65000000	35000000	44000000	67000000	74000000	38250000	52875000	1.38235	0.364202	0.438658	55000000	50750000	1.43791	1.3268	0.523972	0.407948	8	FALSE	TRUE	TRUE	55	411	13.382	Tnon_mito	FBP|FUBP|Q96AE4	ENSG00000162613
BUB3	Mitotic checkpoint protein BUB3 OS=Homo sapiens GN=BUB3 PE=1 SV=1	5	5	45	38000000	39000000	15000000	22000000	13000000	19000000	22000000	25000000	22000000	24000000	32000000	38000000	28500000	24375000	0.855263	0.560333	0.251554	29000000	19750000	1.01754	0.692982	0.025091	-0.529109	8	FALSE	TRUE	TRUE	112	411	27.2506	Tnon_mito	BUB3L|hBUB3|O43684	ENSG00000154473
SNRNP40	U5 small nuclear ribonucleoprotein 40 kDa protein OS=Homo sapiens GN=SNRNP40 PE=1 SV=1	6	6	24	31000000	27000000	21000000	16000000		12000000			7100000	12000000	15000000	16000000	23750000	12420000	0.522947	0.0325063	1.48803	12525000	12000000	0.527368	0.505263	-0.923117	-0.984893	5	TRUE	TRUE	TRUE	71	411	17.2749	Tnon_mito	40K|HPRP8BP|PRP8BP|PRPF8BP|RP11-490K7.3|SPF38|WDR57|Q96DI7	ENSG00000060688
TLK1	Isoform 3 of Serine/threonine-protein kinase tousled-like 1 OS=Homo sapiens GN=TLK1	1	1	1							15000000						0	15000000					15000000	0	100		6.64386	1	TRUE	FALSE	FALSE	0	411	0	Tnon_mito	PKU-beta|Q9UKI8	ENSG00000198586
ILVBL	Acetolactate synthase-like protein OS=Homo sapiens GN=ILVBL PE=1 SV=2	3	3	10	35000000	21000000			21000000			9800000	14000000		25000000		28000000	17450000	0.623214	0.34356	0.463998	19500000	15400000	0.696429	0.55	-0.521953	-0.862496	4	FALSE	TRUE	TRUE	9	411	2.18978	Tnon_mito	209L8|AHAS|ILV2H|A1L0T0	ENSG00000105135
STK38L	Serine/threonine-protein kinase 38-like OS=Homo sapiens GN=STK38L PE=1 SV=3	4	6	19	25000000		18000000	24000000		12000000				15000000			2.23333e+07	13500000	0.604478	0.0447013	1.34968	15000000	12000000	0.671642	0.537313	-0.574236	-0.896164	2	TRUE	TRUE	TRUE	118	411	28.7105	Tnon_mito	NDR2|Q9Y2H1	ENSG00000211455
TAB2	TGF-beta-activated kinase 1 and MAP3K7-binding protein 2 OS=Homo sapiens GN=TAB2 PE=1 SV=1	2	2	13	30000000	33000000	17000000	18000000							11000000	11000000	24500000	11000000	0.44898	0.0457823	1.3393	11000000		0.44898	0	-1.15528		2	TRUE	FALSE	TRUE	10	411	2.43309	Tnon_mito	CHTD2|MAP3K7IP2|Q9NYJ8	ENSG00000055208
RSL1D1	Ribosomal L1 domain-containing protein 1 OS=Homo sapiens GN=RSL1D1 PE=1 SV=3	1	1	1										5600000			0	5600000				5600000		100	0	6.64386		1	TRUE	FALSE	FALSE	98	411	23.8443	Tnon_mito	CSIG|PBK1|UTP30|O76021	ENSG00000171490
PABPC1	Polyadenylate-binding protein 1 OS=Homo sapiens GN=PABPC1 PE=1 SV=2	18	26	478	420000000	530000000	220000000	290000000	340000000	510000000	390000000	480000000	300000000	470000000	310000000	390000000	365000000	398750000	1.09247	0.673694	0.171537	367500000	430000000	1.00685	1.17808	0.00984779	0.23644	8	FALSE	TRUE	TRUE	172	411	41.8491	Tnon_mito	PAB1|PABP|PABP1|PABPC2|PABPL1|P11940	ENSG00000070756
ANAPC7	Anaphase-promoting complex subunit 7 OS=Homo sapiens GN=ANAPC7 PE=1 SV=4	2	2	3									7500000				0	7500000				7500000		100	0	6.64386		1	TRUE	FALSE	FALSE	9	411	2.18978	Tnon_mito	APC7|Q9UJX3	ENSG00000196510
FKBP10	Peptidyl-prolyl cis-trans isomerase FKBP10 OS=Homo sapiens GN=FKBP10 PE=1 SV=1	4	4	13	15000000	18000000							5600000	7100000	18000000	23000000	16500000	13425000	0.813636	0.533768	0.272647	13425000		0.813636	0	-0.297544		4	FALSE	TRUE	TRUE	8	411	1.94647	Tmito	FKBP65|OI11|OI6|PPIASE|hFKBP65|Q96AY3	ENSG00000141756
ACBD3	Golgi resident protein GCP60 OS=Homo sapiens GN=ACBD3 PE=1 SV=4	3	3	4		16000000						9300000			15000000		16000000	12150000	0.759375			15000000	9300000	0.9375	0.58125	-0.0931094	-0.782769	2	TRUE	TRUE	FALSE	22	411	5.3528	Tpossible_mito	GCP60|GOCAP1|GOLPH1|PAP7|Q9H3P7	ENSG00000182827
SLC35E1	Solute carrier family 35 member E1 OS=Homo sapiens GN=SLC35E1 PE=1 SV=2	1	1	2						7100000		7900000					0	7500000					7500000	0	100		6.64386	2	TRUE	FALSE	FALSE	4	411	0.973236	Tnon_mito	Q96K37	ENSG00000127526
OBFC1	CST complex subunit STN1 OS=Homo sapiens GN=OBFC1 PE=1 SV=2	1	1	1		470000000											470000000	0	0					0	0			0	TRUE	FALSE	FALSE	0	411	0	Tnon_mito	AAF-44|AAF44|RP11-541N10.2|RPA-32|STN1|bA541N10.2|Q9H668	ENSG00000107960
CSNK1E	Casein kinase I isoform epsilon OS=Homo sapiens GN=CSNK1E PE=1 SV=1	1	1	1		5000000											5000000	0	0					0	0			0	TRUE	FALSE	FALSE	18	411	4.37956	Tnon_mito	CKIe|LOC400927-CSNK1E|B3KRV2
KIAA0368	Proteasome-associated protein ECM29 homolog OS=Homo sapiens GN=KIAA0368 PE=2 SV=1	1	1	1			76000000										76000000	0	0					0	0			0	TRUE	FALSE	FALSE	26	411	6.32603	Tnon_mito	ECM29|Q5VYK3	ENSG00000136813
CNOT11	CCR4-NOT transcription complex subunit 11 OS=Homo sapiens GN=CNOT11 PE=1 SV=1	1	1	9	9200000	11000000				3400000	4600000	3800000	5000000	5200000	7500000	8300000	10100000	5400000	0.534653	0.038984	1.40911	6500000	3.93333e+06	0.643564	0.389439	-0.635844	-1.36053	7	TRUE	FALSE	TRUE	12	411	2.91971	Tnon_mito	C2orf29|Q9UKZ1	ENSG00000158435
RDX	Isoform 5 of Radixin OS=Homo sapiens GN=RDX	8	11	41	18000000	13000000	12000000	14000000			3800000		3800000		21000000	25000000	14250000	13400000	0.940351	0.891073	0.0500865	16600000	3800000	1.16491	0.266667	0.220221	-1.90689	4	FALSE	TRUE	TRUE	78	411	18.9781	Tnon_mito	DFNB24|P35241	ENSG00000137710
CACYBP	Calcyclin-binding protein OS=Homo sapiens GN=CACYBP PE=1 SV=2	8	8	38	71000000	35000000	19000000	22000000			35000000	19000000	23000000	31000000	110000000	55000000	36750000	45500000	1.2381	0.645551	0.19007	54750000	27000000	1.4898	0.734694	0.575115	-0.444785	6	FALSE	TRUE	TRUE	67	411	16.3017	Tnon_mito	GIG5|RP1-102G20.6|S100A6BP|SIP|Q9HB71	ENSG00000116161
GOLGA3	Golgin subfamily A member 3 OS=Homo sapiens GN=GOLGA3 PE=1 SV=2	5	5	6	17000000	9400000	6500000	5700000									9650000	0	0					0	0			0	TRUE	TRUE	TRUE	23	411	5.59611	Tnon_mito	GCP170|MEA-2|Q08378	ENSG00000090615
SNRPA1	U2 small nuclear ribonucleoprotein A' OS=Homo sapiens GN=SNRPA1 PE=1 SV=2	10	10	140	180000000	200000000	120000000	120000000	46000000	67000000	70000000	74000000	71000000	69000000	79000000	110000000	155000000	73250000	0.472581	0.0236413	1.62633	82250000	64250000	0.530645	0.414516	-0.914181	-1.2705	8	TRUE	TRUE	TRUE	120	411	29.1971	Tnon_mito	Lea1|P09661	ENSG00000131876
PDS5A	Sister chromatid cohesion protein PDS5 homolog A OS=Homo sapiens GN=PDS5A PE=1 SV=1	9	9	39	14000000	19000000	12000000	11000000	5500000	6200000	12000000	6200000	10000000	6900000	19000000	11000000	14000000	9600000	0.685714	0.104917	0.979155	11725000	7475000	0.8375	0.533929	-0.255839	-0.905281	8	FALSE	TRUE	TRUE	43	411	10.4623	Tnon_mito	SCC-112|SCC112|Q29RF7	ENSG00000121892
FAM208A	Protein FAM208A OS=Homo sapiens GN=FAM208A PE=1 SV=3	1	1	1								16000000					0	16000000					16000000	0	100		6.64386	1	TRUE	FALSE	FALSE	37	411	9.00243	Tnon_mito	C3orf63|RAP140|se89-1|Q9UK61	ENSG00000163946
HEATR5A	HEAT repeat-containing protein 5A OS=Homo sapiens GN=HEATR5A PE=2 SV=1	1	1	1										110000			0	110000				110000		100	0	6.64386		1	TRUE	FALSE	FALSE	8	411	1.94647	Tnon_mito	C14orf125|Q86XA9	ENSG00000129493
YLPM1	Isoform 4 of YLP motif-containing protein 1 OS=Homo sapiens GN=YLPM1	1	1	3		12000000			4700000							6600000	12000000	5650000	0.470833			6600000	4700000	0.55	0.391667	-0.862496	-1.3523	2	TRUE	FALSE	FALSE	45	411	10.9489	Tnon_mito	C14orf170|ZAP113|ZAP3|P49750	ENSG00000119596
RALGAPB	Ral GTPase-activating protein subunit beta OS=Homo sapiens GN=RALGAPB PE=1 SV=1	2	2	2									14000000	12000000			0	13000000				13000000		100	0	6.64386		2	TRUE	FALSE	FALSE	2	411	0.486618	Tnon_mito	KIAA1219|RalGAPbeta|Q86X10	ENSG00000170471
CCDC146	Coiled-coil domain-containing protein 146 OS=Homo sapiens GN=CCDC146 PE=2 SV=2	1	1	1									190000000				0	190000000				190000000		100	0	6.64386		1	TRUE	FALSE	FALSE	0	411	0	Tnon_mito	Q8IYE0	ENSG00000135205
PALB2	Partner and localizer of BRCA2 OS=Homo sapiens GN=PALB2 PE=1 SV=1	1	1	1												7500000	0	7500000				7500000		100	0	6.64386		1	TRUE	FALSE	FALSE	5	411	1.21655	Tnon_mito	FANCN|PNCA3|Q86YC2	ENSG00000083093
MTDH	Protein LYRIC OS=Homo sapiens GN=MTDH PE=1 SV=2	9	9	60	47000000	48000000	17000000	19000000			14000000	11000000	11000000	13000000	25000000	30000000	32750000	1.73333e+07	0.529262	0.168712	0.772853	19750000	12500000	0.603053	0.381679	-0.729642	-1.38957	6	FALSE	TRUE	TRUE	50	411	12.1655	Tnon_mito	3D3|AEG-1|AEG1|LYRIC|LYRIC/3D3|Q86UE4	ENSG00000147649
SBSN	Suprabasin OS=Homo sapiens GN=SBSN PE=2 SV=2	2	2	7			7400000	3700000				1300000		3300000			5550000	2300000	0.414414	0.29674	0.527624	3300000	1300000	0.594595	0.234234	-0.750022	-2.09398	2	FALSE	FALSE	TRUE	41	411	9.97567	Tnon_mito	UNQ698|Q6UWP8	ENSG00000189001
PIN4	Isoform 2 of Peptidyl-prolyl cis-trans isomerase NIMA-interacting 4 OS=Homo sapiens GN=PIN4	1	1	15	50000000	55000000			14000000	15000000	23000000	22000000	17000000	17000000	70000000	79000000	52500000	32125000	0.611905	0.0694779	1.15815	45750000	18500000	0.871429	0.352381	-0.198546	-1.50479	8	FALSE	FALSE	TRUE	81	411	19.708	Tpossible_mito	EPVH|PAR14|PAR17|Q9Y237	ENSG00000102309
GTF3C5	Isoform 3 of General transcription factor 3C polypeptide 5 OS=Homo sapiens GN=GTF3C5	1	1	7		8300000	2600000			4400000		4700000	3000000	4500000		7900000	5450000	4900000	0.899083	0.879713	0.0556589	5.13333e+06	4550000	0.941896	0.834862	-0.0863603	-0.26039	5	FALSE	FALSE	TRUE	41	411	9.97567	Tnon_mito	TFIIIC63|TFIIICepsilon|TFiiiC2-63|Q9Y5Q8	ENSG00000148308
SUMF2	Sulfatase-modifying factor 2 OS=Homo sapiens GN=SUMF2 PE=2 SV=1	1	1	1												11000000	0	11000000				11000000		100	0	6.64386		1	TRUE	FALSE	FALSE	4	411	0.973236	Tnon_mito	pFGE|Q8NBJ7	ENSG00000129103
VIM	Vimentin OS=Homo sapiens GN=VIM PE=1 SV=4	24	25	219	86000000	66000000	50000000	59000000	95000000	89000000	170000000	120000000	98000000	130000000	77000000	53000000	65250000	104000000	1.59387	0.0256456	1.59099	89500000	118500000	1.37165	1.81609	0.45591	0.860837	8	TRUE	TRUE	TRUE	257	411	62.5304	Tnon_mito	CTRCT30|HEL113|P08670	ENSG00000026025
DBN1	Isoform 3 of Drebrin OS=Homo sapiens GN=DBN1	13	13	88	150000000	170000000	110000000	110000000	30000000	9500000	32000000	35000000	35000000	28000000	50000000	61000000	135000000	35062500	0.259722	0.00391325	2.40746	43500000	26625000	0.322222	0.197222	-1.63387	-2.34211	8	TRUE	TRUE	TRUE	87	411	21.1679	Tnon_mito	D0S117E|Q16643	ENSG00000113758
DGCR14	Protein DGCR14 OS=Homo sapiens GN=DGCR14 PE=1 SV=1	1	1	1										4900000			0	4900000				4900000		100	0	6.64386		1	TRUE	FALSE	FALSE	12	411	2.91971	Tnon_mito	DGCR13|DGS-H|DGS-I|DGSH|DGSI|ES2|Es2el|Q96DF8	ENSG00000100056
ELMOD2	ELMO domain-containing protein 2 OS=Homo sapiens GN=ELMOD2 PE=1 SV=1	2	2	13	29000000	26000000				20000000	19000000	20000000	23000000	25000000	27000000	25000000	27500000	2.27143e+07	0.825974	0.105961	0.974853	25000000	1.96667e+07	0.909091	0.715152	-0.137504	-0.483679	7	FALSE	FALSE	TRUE	1	411	0.243309	Tnon_mito	9830169G11Rik|Q8IZ81	ENSG00000179387
RPL19	60S ribosomal protein L19 OS=Homo sapiens GN=RPL19 PE=1 SV=1	2	2	58	320000000	430000000	140000000	170000000	55000000	73000000	93000000	93000000	97000000	100000000	230000000	270000000	265000000	126375000	0.476887	0.130015	0.886008	174250000	78500000	0.657547	0.296226	-0.604834	-1.75523	8	FALSE	FALSE	TRUE	210	411	51.0949	Tnon_mito	L19|P84098	ENSG00000108298
RPS28	40S ribosomal protein S28 OS=Homo sapiens GN=RPS28 PE=1 SV=1	2	2	124	1200000000	950000000	900000000	950000000	870000000	660000000	1100000000	600000000	580000000	720000000	610000000	490000000	1000000000	703750000	0.70375	0.0143776	1.84231	600000000	807500000	0.6	0.8075	-0.736966	-0.308466	8	TRUE	FALSE	TRUE	182	411	44.2822	Tnon_mito	S28|P62857	ENSG00000233927
RPL14	60S ribosomal protein L14 OS=Homo sapiens GN=RPL14 PE=1 SV=4	4	4	77	360000000	360000000	86000000	100000000	150000000	130000000	130000000	210000000	120000000	170000000	220000000	250000000	226500000	172500000	0.761589	0.539275	0.26819	190000000	155000000	0.838852	0.684327	-0.253512	-0.547243	8	FALSE	TRUE	TRUE	156	411	37.9562	Tnon_mito	CAG-ISL-7|CTG-B33|L14|RL14|hRL14|P50914	ENSG00000188846
BLMH	Bleomycin hydrolase OS=Homo sapiens GN=BLMH PE=1 SV=1	2	2	5				12000000							20000000	25000000	12000000	22500000	1.875			22500000		1.875	0	0.906891		2	TRUE	FALSE	TRUE	35	411	8.51582	Tnon_mito	BH|BMH|Q13867	ENSG00000108578
HSPA1A	Heat shock 70 kDa protein 1A/1B OS=Homo sapiens GN=HSPA1A PE=1 SV=5	22	31	1433	2400000000	2900000000	1800000000	2200000000	1000000000	1400000000	1300000000	1500000000	1300000000	1700000000	2700000000	2800000000	2325000000	1712500000	0.736559	0.0972944	1.01191	2125000000	1300000000	0.913978	0.55914	-0.129768	-0.838719	8	FALSE	TRUE	TRUE	395	411	96.1071	Tpossible_mito	HEL-S-103|HSP70-1|HSP70-1A|HSP70I|HSP72|HSPA1|B3KTT5	ENSG00000204388
SCD5	Stearoyl-CoA desaturase 5 OS=Homo sapiens GN=SCD5 PE=1 SV=2	1	1	2						4600000				4800000			0	4700000				4800000	4600000	100	100	6.64386	6.64386	2	TRUE	FALSE	FALSE	0	411	0	Tnon_mito	ACOD4|FADS4|HSCD5|SCD2|SCD4|Q86SK9	ENSG00000145284
POTEE	POTE ankyrin domain family member E OS=Homo sapiens GN=POTEE PE=1 SV=3	1	10	333					33000000		55000000						0	44000000					44000000	0	100		6.64386	2	TRUE	TRUE	TRUE	352	411	85.6448	Tnon_mito	A26C1|A26C1A|CT104.2|POTE-2|POTE2|POTE2gamma|Q6S8J3	ENSG00000188219
BOLA2	BolA-like protein 2 (Fragment) OS=Homo sapiens GN=BOLA2 PE=3 SV=1	1	1	2			16000000								25000000		16000000	25000000	1.5625			25000000		1.5625	0	0.643856		1	TRUE	FALSE	FALSE	72	411	17.5182	Tnon_mito	BOLA2A|My016	ENSG00000157106
CGGBP1	CGG triplet repeat-binding protein 1 OS=Homo sapiens GN=CGGBP1 PE=1 SV=2	1	1	3	14000000			10000000							11000000		12000000	11000000	0.916667			11000000		0.916667	0	-0.125531		1	TRUE	FALSE	FALSE	4	411	0.973236	Tnon_mito	CGGBP|p20-CGGBP|Q9UFW8	ENSG00000163320
IER2	Immediate early response gene 2 protein OS=Homo sapiens GN=IER2 PE=1 SV=1	1	1	1							4100000						0	4100000					4100000	0	100		6.64386	1	TRUE	FALSE	FALSE	0	411	0	Tnon_mito	ETR101|Q9BTL4	ENSG00000160888
TSHZ3	Teashirt homolog 3 OS=Homo sapiens GN=TSHZ3 PE=1 SV=2	1	1	1					100000000								0	100000000					100000000	0	100		6.64386	1	TRUE	FALSE	FALSE	2	411	0.486618	Tpossible_mito	TSH3|ZNF537|Q63HK5	ENSG00000121297
LAMC1	Laminin subunit gamma-1 OS=Homo sapiens GN=LAMC1 PE=1 SV=3	2	2	10	8600000	8500000					4100000	3700000	3600000	2900000		7300000	8550000	4320000	0.505263	0.0052542	2.27949	4600000	3900000	0.538012	0.45614	-0.894291	-1.13245	5	TRUE	FALSE	TRUE	14	411	3.40633	Tmito	LAMB2|P11047	ENSG00000135862
ESYT1	Isoform 2 of Extended synaptotagmin-1 OS=Homo sapiens GN=ESYT1	7	7	19	8800000				11000000	5800000	10000000	5700000	6000000	7900000	8700000	6200000	8800000	7662500	0.870739			7200000	8125000	0.818182	0.923295	-0.289507	-0.115136	8	TRUE	TRUE	TRUE	53	411	12.8954	Tnon_mito	FAM62A|MBC2|Q9BSJ8	ENSG00000139641
TMED9	Transmembrane emp24 domain-containing protein 9 OS=Homo sapiens GN=TMED9 PE=1 SV=2	2	2	18	45000000	47000000	12000000	16000000	23000000	39000000	29000000	34000000	27000000	36000000	37000000	43000000	30000000	33500000	1.11667	0.736402	0.132885	35750000	31250000	1.19167	1.04167	0.252981	0.0588937	8	FALSE	FALSE	TRUE	11	411	2.6764	Tnon_mito	GMP25|HSGP25L2G|p25|Q9BVK6	ENSG00000184840
TPP1	Tripeptidyl-peptidase 1 OS=Homo sapiens GN=TPP1 PE=1 SV=2	4	4	29	29000000	23000000	11000000	22000000	13000000	15000000	20000000	21000000	20000000	22000000	19000000	15000000	21250000	18125000	0.852941	0.475511	0.322839	19000000	17250000	0.894118	0.811765	-0.161463	-0.300866	8	FALSE	TRUE	TRUE	4	411	0.973236	Tpossible_mito	CLN2|LPIC|SCAR7|TPP-1|O14773	ENSG00000166340
KIAA0430	Meiosis arrest female protein 1 OS=Homo sapiens GN=KIAA0430 PE=1 SV=6	1	1	2			2700000										2700000	0	0					0	0			0	TRUE	FALSE	FALSE	1	411	0.243309	Tnon_mito	LKAP|MARF1|PPP1R34|Q9Y4F3	ENSG00000166783
ZC3H18	Zinc finger CCCH domain-containing protein 18 OS=Homo sapiens GN=ZC3H18 PE=2 SV=1	1	1	2	2700000	3700000											3200000	0	0					0	0			0	TRUE	FALSE	FALSE	54	411	13.1387	Tnon_mito	NHN1|Q86VM9	ENSG00000158545
RBM33	RNA-binding protein 33 OS=Homo sapiens GN=RBM33 PE=1 SV=3	1	1	1		6500000											6500000	0	0					0	0			0	TRUE	FALSE	FALSE	27	411	6.56934	Tnon_mito	PRR8|Q96EV2	ENSG00000184863
FAM98B	Isoform 2 of Protein FAM98B OS=Homo sapiens GN=FAM98B	8	10	75	42000000	46000000	38000000	41000000	29000000	38000000	36000000	34000000	32000000	42000000	34000000	36000000	41750000	35125000	0.841317	0.0174051	1.75932	36000000	34250000	0.862275	0.820359	-0.213779	-0.285672	8	TRUE	TRUE	TRUE	54	411	13.1387	Tnon_mito	Q52LJ0	ENSG00000171262
ADD1	Isoform 3 of Alpha-adducin OS=Homo sapiens GN=ADD1	6	7	11	11000000	16000000	16000000	18000000									15250000	0	0					0	0			0	TRUE	TRUE	TRUE	42	411	10.219	Tnon_mito	ADDA|P35611	ENSG00000087274
GBF1	Golgi-specific brefeldin A-resistance guanine nucleotide exchange factor 1 OS=Homo sapiens GN=GBF1 PE=1 SV=2	2	2	2												6500000	0	6500000				6500000		100	0	6.64386		1	TRUE	FALSE	FALSE	6	411	1.45985	Tpossible_mito	ARF1GEF|Q92538	ENSG00000107862
AAMP	Angio-associated migratory cell protein OS=Homo sapiens GN=AAMP PE=4 SV=1	2	2	3											6300000	6800000		6550000		0.0242867	1.61463	6550000		100	0	6.64386		2	TRUE	FALSE	FALSE	4	411	0.973236	Tnon_mito	Q13685	ENSG00000127837
PARP1	Poly [ADP-ribose] polymerase 1 OS=Homo sapiens GN=PARP1 PE=1 SV=4	31	31	263	150000000	160000000	67000000	81000000	47000000	62000000	64000000	67000000	58000000	82000000	110000000	140000000	114500000	78750000	0.687773	0.236962	0.625321	97500000	60000000	0.851528	0.524017	-0.231873	-0.932313	8	FALSE	TRUE	TRUE	182	411	44.2822	Tpossible_mito	ADPRT|ADPRT 1|ADPRT1|ARTD1|PARP|PARP-1|PPOL|pADPRT-1|P09874	ENSG00000143799
BMX	Cytoplasmic tyrosine-protein kinase BMX OS=Homo sapiens GN=BMX PE=1 SV=1	1	1	14		140000000	130000000			53000000	33000000	45000000		49000000			135000000	45000000	0.333333	0.00181742	2.74055	49000000	4.36667e+07	0.362963	0.323457	-1.46211	-1.62836	4	TRUE	FALSE	TRUE	0	411	0	Tnon_mito	ETK|PSCTK2|PSCTK3|P51813	ENSG00000102010
CALU	Isoform 3 of Calumenin OS=Homo sapiens GN=CALU	9	9	70	73000000	88000000	16000000	22000000		22000000	28000000	33000000	21000000	26000000	91000000	95000000	49750000	4.51429e+07	0.907394	0.840746	0.0753352	58250000	2.76667e+07	1.17085	0.556114	0.227562	-0.846548	7	FALSE	TRUE	TRUE	61	411	14.8418	Tnon_mito	O43852	ENSG00000128595
CDK1	Cyclin-dependent kinase 1 OS=Homo sapiens GN=CDK1 PE=1 SV=3	2	3	8	14000000		7000000		11000000							13000000	10500000	12000000	1.14286	0.743351	0.128806	13000000	11000000	1.2381	1.04762	0.308122	0.0671142	2	FALSE	TRUE	TRUE	81	411	19.708	Tpossible_mito	CDC2|CDC28A|P34CDC2|P06493	ENSG00000170312
CDK2	Cyclin-dependent kinase 2 OS=Homo sapiens GN=CDK2 PE=4 SV=1	1	2	5											8600000		0	8600000				8600000		100	0	6.64386		1	TRUE	FALSE	TRUE	45	411	10.9489	Tnon_mito	p33(CDK2)|P24941	ENSG00000123374
CDK9	Isoform 2 of Cyclin-dependent kinase 9 OS=Homo sapiens GN=CDK9	1	2	14	18000000	20000000	8900000	10000000		7700000	6500000	7000000	7200000	6500000		10000000	14225000	7.48333e+06	0.526069	0.0926873	1.03298	7900000	7.06667e+06	0.55536	0.496778	-0.848504	-1.00933	6	FALSE	FALSE	TRUE	47	411	11.4355	Tnon_mito	C-2k|CDC2L4|CTK1|PITALRE|TAK|P50750	ENSG00000136807
CDKN2B	Cyclin-dependent kinase 4 inhibitor B OS=Homo sapiens GN=CDKN2B PE=1 SV=1	1	1	1		5000000											5000000	0	0					0	0			0	TRUE	FALSE	FALSE	2	411	0.486618	Tnon_mito	CDK4I|INK4B|MTS2|P15|TP15|p15INK4b|P42772	ENSG00000147883
CYP51A1	Lanosterol 14-alpha demethylase OS=Homo sapiens GN=CYP51A1 PE=1 SV=3	4	4	27	23000000	17000000		6500000	12000000	13000000	11000000	13000000	17000000	16000000	20000000	20000000	15500000	15250000	0.983871	0.964038	0.0159061	18250000	12250000	1.17742	0.790323	0.235628	-0.339486	8	FALSE	TRUE	TRUE	8	411	1.94647	Tnon_mito	CP51|CYP51|CYPL1|LDM|P450-14DM|P450L1|Q16850	ENSG00000001630
DNA2	DNA replication ATP-dependent helicase/nuclease DNA2 (Fragment) OS=Homo sapiens GN=DNA2 PE=4 SV=1	1	1	3			29000000000		35000000000				17000000000				29000000000	26000000000	0.896552			17000000000	35000000000	0.586207	1.2069	-0.770518	0.271302	2	TRUE	FALSE	FALSE	1	411	0.243309	Tmito	DNA2L|PEOA6|hDNA2|P51530	ENSG00000138346
EIF2S1	Eukaryotic translation initiation factor 2 subunit 1 OS=Homo sapiens GN=EIF2S1 PE=1 SV=3	15	15	154	220000000	160000000	110000000	120000000	83000000	75000000	45000000	63000000	69000000	82000000	140000000	86000000	152500000	80375000	0.527049	0.0553649	1.25677	94250000	66500000	0.618033	0.436066	-0.694245	-1.19738	8	FALSE	TRUE	TRUE	101	411	24.5742	Tnon_mito	EIF-2|EIF-2A|EIF-2alpha|EIF2|EIF2A|P05198	ENSG00000134001
FBL	rRNA 2'-O-methyltransferase fibrillarin OS=Homo sapiens GN=FBL PE=1 SV=2	4	4	13	190000000	42000000	48000000		48000000	28000000	59000000			24000000	92000000		9.33333e+07	50200000	0.537857	0.46923	0.328614	58000000	45000000	0.621429	0.482143	-0.68634	-1.05247	5	FALSE	TRUE	TRUE	161	411	39.1727	Tnon_mito	FIB|FLRN|RNU3IP1|P22087	ENSG00000105202
EWSR1	Isoform 5 of RNA-binding protein EWS OS=Homo sapiens GN=EWSR1	10	10	355	1300000000	1600000000	1100000000	1200000000	1400000000	1800000000	1600000000	2000000000	1500000000	1700000000	1100000000	1500000000	1300000000	1575000000	1.21154	0.0954562	1.0202	1450000000	1700000000	1.11538	1.30769	0.157541	0.387023	8	FALSE	TRUE	TRUE	143	411	34.7932	Tnon_mito	EWS|bK984G1.4|Q01844	ENSG00000182944
FUS	RNA-binding protein FUS OS=Homo sapiens GN=FUS PE=1 SV=1	9	11	318	470000000	440000000	180000000	210000000	310000000	370000000	460000000	450000000	290000000	380000000	240000000	230000000	325000000	341250000	1.05	0.851978	0.0695715	285000000	397500000	0.876923	1.22308	-0.189478	0.290515	8	FALSE	TRUE	TRUE	188	411	45.7421	Tnon_mito	ALS6|ETM4|FUS1|HNRNPP2|POMP75|TLS|P35637	ENSG00000089280
HELLS	Lymphoid-specific helicase OS=Homo sapiens GN=HELLS PE=1 SV=1	1	1	1											5400000		0	5400000				5400000		100	0	6.64386		1	TRUE	FALSE	FALSE	15	411	3.64964	Tnon_mito	LSH|PASG|SMARCA6|Q9NRZ9	ENSG00000119969
HMGB1	High mobility group protein B1 OS=Homo sapiens GN=HMGB1 PE=1 SV=3	4	5	46	47000000	66000000	20000000	31000000	29000000	20000000	39000000	29000000	29000000	39000000	91000000	100000000	41000000	47000000	1.14634	0.693767	0.158786	64750000	29250000	1.57927	0.713415	0.659256	-0.487187	8	FALSE	TRUE	TRUE	106	411	25.7908	Tnon_mito	HMG1|HMG3|SBP-1|P09429	ENSG00000189403
HMGB2	High mobility group protein B2 OS=Homo sapiens GN=HMGB2 PE=1 SV=2	4	5	52	80000000	100000000	17000000	35000000	29000000	37000000	39000000	50000000	35000000	50000000	110000000	120000000	58000000	58750000	1.01293	0.975117	0.0109434	78750000	38750000	1.35776	0.668103	0.441227	-0.581857	8	FALSE	TRUE	TRUE	65	411	15.8151	Tnon_mito	HMG2|P26583	ENSG00000164104
HMGB3	High mobility group protein B3 OS=Homo sapiens GN=HMGB3 PE=1 SV=4	2	2	2											23000000		0	23000000				23000000		100	0	6.64386		1	TRUE	FALSE	FALSE	38	411	9.24574	Tnon_mito	HMG-2a|HMG-4|HMG2A|HMG4|O15347	ENSG00000029993
HNRNPA1	Heterogeneous nuclear ribonucleoprotein A1 OS=Homo sapiens GN=HNRNPA1 PE=1 SV=5	14	16	331	610000000	680000000	310000000	360000000	460000000	440000000	640000000	530000000	420000000	440000000	370000000	380000000	490000000	460000000	0.938776	0.772209	0.112265	402500000	517500000	0.821429	1.05612	-0.283793	0.0787771	8	FALSE	TRUE	TRUE	268	411	65.2068	Tnon_mito	ALS19|ALS20|HNRPA1|HNRPA1L3|IBMPFD3|hnRNP A1|hnRNP-A1|P09651	ENSG00000135486
HNRNPA2B1	Heterogeneous nuclear ribonucleoproteins A2/B1 OS=Homo sapiens GN=HNRNPA2B1 PE=1 SV=2	13	15	214	460000000	480000000	200000000	240000000	230000000	250000000	320000000	280000000	150000000	220000000	260000000	250000000	345000000	245000000	0.710145	0.264822	0.577045	220000000	270000000	0.637681	0.782609	-0.649093	-0.353637	8	FALSE	TRUE	TRUE	262	411	63.747	Tnon_mito	HNRNPA2|HNRNPB1|HNRPA2|HNRPA2B1|HNRPB1|IBMPFD2|RNPA2|SNRPB1|P22626	ENSG00000122566
HNRNPAB	Isoform 2 of Heterogeneous nuclear ribonucleoprotein A/B OS=Homo sapiens GN=HNRNPAB	8	9	143	270000000	310000000	160000000	190000000	140000000	190000000	180000000	210000000	150000000	190000000	160000000	180000000	232500000	175000000	0.752688	0.196256	0.707178	170000000	180000000	0.731183	0.774194	-0.451696	-0.369234	8	FALSE	TRUE	TRUE	206	411	50.1217	Tnon_mito	ABBP1|HNRPAB|Q99729	ENSG00000197451
HNRNPC	Heterogeneous nuclear ribonucleoproteins C1/C2 OS=Homo sapiens GN=HNRNPC PE=1 SV=4	7	7	89	180000000	120000000	70000000	80000000	57000000	74000000	93000000	81000000	54000000	72000000	100000000	82000000	112500000	76625000	0.681111	0.247373	0.606647	77000000	76250000	0.684444	0.677778	-0.546995	-0.561116	8	FALSE	TRUE	TRUE	180	411	43.7956	Tnon_mito	C1|C2|HNRNP|HNRPC|SNRPC|P07910	ENSG00000092199
HNRNPD	Heterogeneous nuclear ribonucleoprotein D0 OS=Homo sapiens GN=HNRNPD PE=1 SV=1	9	11	164	380000000	480000000	250000000	300000000	220000000	290000000	290000000	340000000	240000000	310000000	270000000	320000000	352500000	285000000	0.808511	0.274963	0.560725	285000000	285000000	0.808511	0.808511	-0.306661	-0.306661	8	FALSE	TRUE	TRUE	216	411	52.5547	Tnon_mito	AUF1|AUF1A|HNRPD|P37|hnRNPD0|Q14103	ENSG00000138668
HNRNPF	Heterogeneous nuclear ribonucleoprotein F OS=Homo sapiens GN=HNRNPF PE=1 SV=3	7	9	80	51000000	61000000	9400000	20000000	12000000			7700000	14000000		18000000	27000000	35350000	15740000	0.445262	0.20946	0.6789	1.96667e+07	9850000	0.556341	0.278642	-0.845958	-1.84351	5	FALSE	TRUE	TRUE	243	411	59.1241	Tnon_mito	HNRPF|OK/SW-cl.23|mcs94-1|P52597	ENSG00000169813
HNRNPH1	Heterogeneous nuclear ribonucleoprotein H OS=Homo sapiens GN=HNRNPH1 PE=2 SV=1	8	16	229	120000000	160000000	120000000	80000000	42000000	56000000	53000000	42000000	44000000	53000000	80000000	89000000	120000000	57375000	0.478125	0.0240285	1.61927	66500000	48250000	0.554167	0.402083	-0.851608	-1.31443	8	TRUE	TRUE	TRUE	263	411	63.9903	Tnon_mito	HNRPH|HNRPH1|hnRNPH|P31943	ENSG00000169045
HNRNPH2	Heterogeneous nuclear ribonucleoprotein H2 OS=Homo sapiens GN=HNRNPH2 PE=1 SV=1	3	10	123	25000000	32000000	9700000	11000000								13000000	19425000	13000000	0.669241			13000000		0.669241	0	-0.579403		1	TRUE	TRUE	TRUE	266	411	64.7202	Tnon_mito	FTP3|HNRPH'|HNRPH2|hnRNPH'|P55795	ENSG00000126945
HNRNPH3	Heterogeneous nuclear ribonucleoprotein H3 OS=Homo sapiens GN=HNRNPH3 PE=1 SV=2	3	4	21	25000000	29000000	7100000	11000000	14000000	15000000	9300000	17000000	7400000	8100000	17000000	14000000	18025000	12725000	0.705964	0.397054	0.401151	11625000	13825000	0.644938	0.76699	-0.632769	-0.38272	8	FALSE	TRUE	TRUE	96	411	23.3577	Tnon_mito	2H9|HNRPH3|P31942	ENSG00000096746
IMPDH2	Inosine-5'-monophosphate dehydrogenase 2 OS=Homo sapiens GN=IMPDH2 PE=1 SV=2	12	12	58	38000000	33000000	24000000	26000000	14000000	14000000	9000000	10000000	9800000	11000000	51000000	44000000	30250000	20350000	0.672727	0.177423	0.75099	28950000	11750000	0.957025	0.38843	-0.0633718	-1.36427	8	FALSE	TRUE	TRUE	83	411	20.1946	Tnon_mito	IMPD2|IMPDH-II|P12268	ENSG00000178035
KLC1	Kinesin light chain 1 OS=Homo sapiens GN=KLC1 PE=4 SV=1	1	1	1											32000000		0	32000000				32000000		100	0	6.64386		1	TRUE	FALSE	FALSE	60	411	14.5985	Tnon_mito	KLC|KNS2|KNS2A|RP11-73M18.7|RP11-73M18.8|Q07866	ENSG00000126214
KIF11	Kinesin-like protein KIF11 OS=Homo sapiens GN=KIF11 PE=1 SV=2	48	48	648	480000000	470000000	490000000	570000000	84000000	77000000	98000000	91000000	46000000	60000000	300000000	270000000	502500000	128250000	0.255224	4.20616e-06	5.37611	169000000	87500000	0.336318	0.174129	-1.5721	-2.52177	8	TRUE	TRUE	TRUE	163	411	39.6594	Tnon_mito	EG5|HKSP|KNSL1|MCLMR|TRIP5|P52732	ENSG00000138160
KIFC1	Kinesin-like protein KIFC1 OS=Homo sapiens GN=KIFC1 PE=1 SV=2	1	1	2											3400000	4100000	0	3750000				3750000		100	0	6.64386		2	TRUE	FALSE	FALSE	26	411	6.32603	Tnon_mito	HSET|KNSL2|Q9BW19	ENSG00000056678
MCM2	DNA replication licensing factor MCM2 OS=Homo sapiens GN=MCM2 PE=1 SV=4	6	6	16	21000000	28000000	13000000	19000000	3600000				9900000	13000000	24000000	14000000	20250000	12900000	0.637037	0.149275	0.826012	15225000	3600000	0.751852	0.177778	-0.41148	-2.49185	5	FALSE	TRUE	TRUE	95	411	23.1144	Tnon_mito	BM28|CCNL1|CDCL1|D3S3194|MITOTIN|cdc19|P49736	ENSG00000073111
MCM7	DNA replication licensing factor MCM7 OS=Homo sapiens GN=MCM7 PE=1 SV=4	5	5	15	34000000	13000000	9400000	8200000			12000000		4300000	4200000	10000000	9600000	16150000	8020000	0.496594	0.273617	0.562857	7025000	12000000	0.434985	0.743034	-1.20096	-0.4285	5	FALSE	TRUE	TRUE	123	411	29.927	Tnon_mito	CDC47|MCM2|P1.1-MCM3|P1CDC47|P85MCM|PNAS146|P33993	ENSG00000166508
MGST2	Microsomal glutathione S-transferase 2 OS=Homo sapiens GN=MGST2 PE=1 SV=1	1	1	2		31000000										16000000	31000000	16000000	0.516129			16000000		0.516129	0	-0.954196		1	TRUE	FALSE	FALSE	1	411	0.243309	Tnon_mito	GST2|MGST-II|Q99735	ENSG00000085871
HNRNPM	Heterogeneous nuclear ribonucleoprotein M OS=Homo sapiens GN=HNRNPM PE=1 SV=3	11	11	102	91000000	130000000	29000000	40000000	25000000	53000000	30000000	57000000	36000000	58000000	60000000	100000000	72500000	52375000	0.722414	0.466503	0.331146	63500000	41250000	0.875862	0.568966	-0.191224	-0.813587	8	FALSE	TRUE	TRUE	220	411	53.528	Tnon_mito	CEAR|HNRNPM4|HNRPM|HNRPM4|HTGR1|NAGR1|hnRNP M|P52272	ENSG00000099783
NASP	Nuclear autoantigenic sperm protein OS=Homo sapiens GN=NASP PE=1 SV=2	18	18	96	34000000	45000000	42000000	43000000	5300000	6400000	6600000	11000000	6200000	8600000	61000000	56000000	41000000	20137500	0.491159	0.0439338	1.3572	32950000	7325000	0.803659	0.178659	-0.315345	-2.48472	8	TRUE	TRUE	TRUE	110	411	26.764	Tnon_mito	FLB7527|PRO1999|P49321	ENSG00000132780
NOP2	Isoform 4 of Putative ribosomal RNA methyltransferase NOP2 OS=Homo sapiens GN=NOP2	1	1	2	8200000	9200000											8700000	0	0					0	0			0	TRUE	FALSE	FALSE	91	411	22.1411	Tnon_mito	NOL1|NOP120|NSUN1|p120|P46087	ENSG00000111641
NONO	Non-POU domain-containing octamer-binding protein OS=Homo sapiens GN=NONO PE=1 SV=4	14	15	256	190000000	220000000	83000000	98000000	95000000	100000000	140000000	170000000	79000000	91000000	140000000	120000000	147750000	116875000	0.791032	0.437865	0.35866	107500000	126250000	0.72758	0.854484	-0.458821	-0.226875	8	FALSE	TRUE	TRUE	220	411	53.528	Tnon_mito	NMT55|NRB54|P54|P54NRB|Q15233	ENSG00000147140
PFDN2	Prefoldin subunit 2 OS=Homo sapiens GN=PFDN2 PE=1 SV=1	2	2	7			15000000	14000000			8300000				45000000	13000000	14500000	22100000	1.52414	0.577652	0.238334	29000000	8300000	2	0.572414	1	-0.80487	3	FALSE	FALSE	TRUE	57	411	13.8686	Tpossible_mito	PFD2|Q9UHV9	ENSG00000143256
PLRG1	Pleiotropic regulator 1 OS=Homo sapiens GN=PLRG1 PE=2 SV=1	3	3	16	20000000	25000000	14000000	17000000				7200000			13000000	14000000	19000000	11400000	0.6	0.0618239	1.20884	13500000	7200000	0.710526	0.378947	-0.49304	-1.39993	3	FALSE	TRUE	TRUE	38	411	9.24574	Tnon_mito	Cwc1|PRL1|PRP46|PRPF46|TANGO4|O43660	ENSG00000171566
PPM1G	Protein phosphatase 1G OS=Homo sapiens GN=PPM1G PE=1 SV=1	2	2	6		7500000	5700000	7200000							9700000	10000000	6800000	9850000	1.44853	0.0255188	1.59314	9850000		1.44853	0	0.534589		2	TRUE	FALSE	TRUE	42	411	10.219	Tnon_mito	PP2CG|PP2CGAMMA|PPP2CG|O15355	ENSG00000115241
PKN2	Serine/threonine-protein kinase N2 OS=Homo sapiens GN=PKN2 PE=1 SV=1	2	2	2		19000000									7100000		19000000	7100000	0.373684			7100000		0.373684	0	-1.42011		1	TRUE	FALSE	FALSE	12	411	2.91971	Tnon_mito	PAK2|PRK2|PRKCL2|PRO2042|Pak-2|Q16513	ENSG00000065243
EIF2AK2	Interferon-induced, double-stranded RNA-activated protein kinase OS=Homo sapiens GN=EIF2AK2 PE=1 SV=2	2	2	6	7700000	15000000	1500000	3300000							8100000	4100000	6875000	6100000	0.887273	0.84068	0.0753692	6100000		0.887273	0	-0.17255		2	FALSE	FALSE	TRUE	14	411	3.40633	Tnon_mito	EIF2AK1|PKR|PRKR|P19525	ENSG00000055332
PSMA4	Proteasome subunit alpha type-4 OS=Homo sapiens GN=PSMA4 PE=1 SV=1	3	3	14	19000000	47000000	27000000	29000000					16000000		46000000	46000000	30500000	36000000	1.18033	0.664883	0.177255	36000000		1.18033	0	0.239188		3	FALSE	TRUE	TRUE	82	411	19.9513	Tnon_mito	HC9|HsT17706|PSC9|P25789	ENSG00000041357
RBBP7	Histone-binding protein RBBP7 OS=Homo sapiens GN=RBBP7 PE=1 SV=1	8	13	43	35000000	27000000	22000000	29000000				14000000			21000000	22000000	28250000	19000000	0.672566	0.0546158	1.26268	21500000	14000000	0.761062	0.495575	-0.393914	-1.01282	3	FALSE	TRUE	TRUE	148	411	36.0097	Tnon_mito	RbAp46|Q16576	ENSG00000102054
RBM3	Putative RNA-binding protein 3 OS=Homo sapiens GN=RBM3 PE=1 SV=1	4	4	71	120000000	98000000	41000000	65000000	46000000	60000000	71000000	62000000	68000000	76000000	98000000	58000000	81000000	67375000	0.83179	0.502359	0.298986	75000000	59750000	0.925926	0.737654	-0.111031	-0.438983	8	FALSE	TRUE	TRUE	88	411	21.4112	Tnon_mito	IS1-RNPL|RNPL|P98179	ENSG00000102317
RBM4	RNA-binding protein 4 OS=Homo sapiens GN=RBM4 PE=1 SV=1	8	8	34	23000000	30000000	17000000	21000000			14000000	16000000	10000000	11000000	13000000	13000000	22750000	1.28333e+07	0.564103	0.0298761	1.52468	11750000	15000000	0.516484	0.659341	-0.953206	-0.600904	6	TRUE	TRUE	TRUE	33	411	8.0292	Tnon_mito	LARK|RBM4A|RP11-658F2.8|ZCCHC21|ZCRB3A|Q9BWF3	ENSG00000173933
UPF1	Regulator of nonsense transcripts 1 OS=Homo sapiens GN=UPF1 PE=1 SV=2	14	14	39	54000000	14000000	4500000	7800000	3800000	7600000	6700000	7800000	5800000	7900000	45000000	15000000	20075000	12450000	0.620174	0.572339	0.242347	18425000	6475000	0.917808	0.32254	-0.123735	-1.63245	8	FALSE	TRUE	TRUE	35	411	8.51582	Tnon_mito	HUPF1|NORF1|RENT1|pNORF1|smg-2|Q92900	ENSG00000005007
ROCK1	Rho-associated protein kinase 1 OS=Homo sapiens GN=ROCK1 PE=1 SV=1	16	19	54	31000000	29000000	25000000	26000000			7200000				11000000	13000000	27750000	10400000	0.374775	0.00104955	2.979	12000000	7200000	0.432432	0.259459	-1.20945	-1.94642	3	TRUE	TRUE	TRUE	28	411	6.81265	Tnon_mito	P160ROCK|ROCK-I|Q13464	ENSG00000067900
RPA1	Replication protein A 70 kDa DNA-binding subunit OS=Homo sapiens GN=RPA1 PE=1 SV=2	11	11	47	74000000	35000000	22000000	29000000	6400000	11000000	39000000	11000000	40000000	19000000	64000000	21000000	40000000	26425000	0.660625	0.360853	0.442669	36000000	16850000	0.9	0.42125	-0.152003	-1.24725	8	FALSE	TRUE	TRUE	84	411	20.438	Tnon_mito	HSSB|MST075|REPA1|RF-A|RP-A|RPA70|P27694	ENSG00000132383
RPA2	Isoform 3 of Replication protein A 32 kDa subunit OS=Homo sapiens GN=RPA2	4	4	16	21000000	3500000	19000000	21000000			13000000	6300000	11000000		14000000	3000000	16125000	9460000	0.586667	0.224157	0.649448	9.33333e+06	9650000	0.578811	0.59845	-0.788835	-0.740698	5	FALSE	TRUE	TRUE	55	411	13.382	Tnon_mito	REPA2|RPA32|P15927	ENSG00000117748
SEC13	Isoform 3 of Protein SEC13 homolog OS=Homo sapiens GN=SEC13	2	2	7	14000000	13000000	7900000	9600000							13000000	15000000	11125000	14000000	1.25843	0.176983	0.752068	14000000		1.25843	0	0.331621		2	FALSE	FALSE	TRUE	61	411	14.8418	Tnon_mito	D3S1231E|SEC13L1|SEC13R|npp-20|P55735	ENSG00000157020
SRSF1	Isoform ASF-2 of Serine/arginine-rich splicing factor 1 OS=Homo sapiens GN=SRSF1	9	9	114	120000000	140000000	67000000	86000000	38000000	53000000	61000000	71000000	43000000	52000000	61000000	67000000	103250000	55750000	0.539952	0.059092	1.22847	55750000	55750000	0.539952	0.539952	-0.889098	-0.889098	8	FALSE	TRUE	TRUE	134	411	32.6034	Tnon_mito	ASF|SF2|SF2p33|SFRS1|SRp30a|Q07955	ENSG00000136450
SRSF3	Serine/arginine-rich splicing factor 3 OS=Homo sapiens GN=SRSF3 PE=1 SV=1	2	3	53	140000000	120000000	65000000	81000000	38000000	56000000	75000000	76000000	56000000	51000000	62000000	66000000	101500000	60000000	0.591133	0.0919145	1.03662	58750000	61250000	0.578818	0.603448	-0.788819	-0.728698	8	FALSE	TRUE	TRUE	197	411	47.9319	Tnon_mito	SFRS3|SRp20|P84103	ENSG00000112081
SRSF5	Serine/arginine-rich splicing factor 5 OS=Homo sapiens GN=SRSF5 PE=1 SV=1	6	7	63	47000000	53000000	22000000	30000000	16000000	11000000	17000000	24000000	21000000	23000000	29000000	35000000	38000000	22000000	0.578947	0.109066	0.962312	27000000	17000000	0.710526	0.447368	-0.49304	-1.16046	8	FALSE	TRUE	TRUE	112	411	27.2506	Tnon_mito	HRS|SFRS5|SRP40|Q13243	ENSG00000100650
SRSF7	Serine/arginine-rich splicing factor 7 OS=Homo sapiens GN=SRSF7 PE=1 SV=1	2	3	44	57000000	91000000	23000000	29000000	29000000	37000000	39000000	53000000	30000000	35000000	38000000	42000000	50000000	37875000	0.7575	0.495134	0.305277	36250000	39500000	0.725	0.79	-0.463947	-0.340075	8	FALSE	TRUE	TRUE	191	411	46.472	Tnon_mito	9G8|AAG3|SFRS7|Q16629	ENSG00000115875
TRA2B	Transformer-2 protein homolog beta OS=Homo sapiens GN=TRA2B PE=1 SV=1	2	2	5		20000000				7800000		10000000	5800000			11000000	20000000	8650000	0.4325			8400000	8900000	0.42	0.445	-1.25154	-1.16812	4	TRUE	FALSE	TRUE	85	411	20.6813	Tnon_mito	Htra2-beta|SFRS10|SRFS10|TRA2-BETA|TRAN2B|P62995	ENSG00000136527
SNRPA	U1 small nuclear ribonucleoprotein A OS=Homo sapiens GN=SNRPA PE=1 SV=3	3	5	49	76000000	66000000	95000000	72000000	130000000	160000000	120000000	77000000	110000000	140000000	28000000	34000000	77250000	99875000	1.29288	0.250269	0.601593	78000000	121750000	1.00971	1.57605	0.0139392	0.656315	8	FALSE	TRUE	TRUE	68	411	16.545	Tnon_mito	Mud1|U1-A|U1A|P09012	ENSG00000077312
SOS2	Son of sevenless homolog 2 OS=Homo sapiens GN=SOS2 PE=1 SV=2	1	1	1												81000000	0	81000000				81000000		100	0	6.64386		1	TRUE	FALSE	FALSE	1	411	0.243309	Tnon_mito	Q07890	ENSG00000100485
SRP72	Signal recognition particle subunit SRP72 OS=Homo sapiens GN=SRP72 PE=1 SV=3	16	16	126	50000000	57000000	27000000	31000000	45000000	33000000	54000000	29000000	59000000	48000000	67000000	52000000	41250000	48375000	1.17273	0.43931	0.357229	56500000	40250000	1.3697	0.975758	0.453857	-0.0354053	8	FALSE	TRUE	TRUE	65	411	15.8151	Tnon_mito	BMFF|HEL103|O76094	ENSG00000174780
SRPK1	Isoform 1 of SRSF protein kinase 1 OS=Homo sapiens GN=SRPK1	7	7	30	35000000	39000000	13000000	18000000	7900000	4900000	23000000	11000000	17000000	13000000	25000000	19000000	26250000	15100000	0.575238	0.178035	0.749494	18500000	11700000	0.704762	0.445714	-0.504792	-1.16581	8	FALSE	TRUE	TRUE	52	411	12.6521	Tnon_mito	SFRSK1|Q96SB4	ENSG00000096063
TRIM21	E3 ubiquitin-protein ligase TRIM21 OS=Homo sapiens GN=TRIM21 PE=2 SV=1	8	9	26	27000000	17000000	24000000	31000000			33000000				52000000		24750000	42500000	1.71717	0.292588	0.533744	52000000	33000000	2.10101	1.33333	1.07108	0.415037	2	FALSE	TRUE	TRUE	146	411	35.5231	Tnon_mito	RNF81|RO52|SSA|SSA1|P19474	ENSG00000132109
[truncated: 1,004 more rows]

## Sheet: S112A-ACPM-MITO HITS
Gene	Protein Description	# Unique Peptides	# Peptides	# PSMs	Areas: Control -BioRep1-Inj1	Areas: Control -BioRep1-Inj2	Areas: Control -BioRep2-Inj1	Areas: Control -BioRep2-Inj2	Areas: BioRep1- (Injection1)	Areas: BioRep1 (Injection2)	Areas: BioRep2 (Injection1)	Areas: BioRep2 (Injection2)	Areas: BioRep3- (Injection1)	Areas: BioRep3 (Injection2)	Areas: BioRep4 (Injection1)	Areas: BioRep4 (Injection2)	Avg Areas - Control Samples	Avg Areas - Samples	Fold Change (Sample/Control)	p-Value	Avg Areas - BioRep1&2	Avg Areas - BioRep3&4	Avg Fold Change_BR1&2	Avg Fold Change_BR3&4	Log2_FoldChange_BR1&2	Log2_FoldChange_BR3&4	Detected in # Injections (Sample Only)	Is pval<0.05?	>3 Unq Peptides?	>5 PSMs?	# Datasets protein found in Crapome	Total Crapome Datasets	% Crapome Probability	MitoCarta2.0 Dataset Annotation	Protein Synonyms	EnsemblGeneID
[truncated: 10 more rows]

[truncated: 1 more sheets: S112A-ACPM-NonMitoHits]
